# Supplementary material for: Mapping the micro-proteome of the nuclear lamina and lamina-associated domains
Source: Life Sci Alliance. 2021 Mar 23;4(5):e202000774. doi: 10.26508/lsa.202000774 (PMC8008952; doi:10.26508/lsa.202000774)
Supplement: Supplementary file 1 [file LSA-2020-00774_TableS1.xlsx]

## Sheet: Proteins above threshold
Gene symbol	Protein Description	Abundance Ratio: (Lap2_BioID) / (m6A-Tracer-BioID alone) - Log2(Median ratio)	Additional notes
Tmpo	lamina-associated polypeptide 2	6.64386
Sec61b	protein transport protein Sec61 subunit beta	6.64386
Lemd3	inner nuclear membrane protein Man1	6.64386
Lmnb1	lamin-B1	6.64386
Lmnb2	lamin-B2	6.64386
Tmem199	transmembrane protein 199	6.64386
Vrk2	serine/threonine-protein kinase VRK2	6.64386
Sun1	SUN domain-containing protein 1	6.64386
Slc39a7	zinc transporter SLC39A7 precursor	6.64386
Ndc1	nucleoporin NDC1	6.64386
Sun2	SUN domain-containing protein 2	6.64386
Tor1aip1	torsin-1A-interacting protein 1	6.64386
Smpd4	sphingomyelin phosphodiesterase 4	6.64386
Ube2j1	ubiquitin-conjugating enzyme E2 J1	6.64386
Ckap4	cytoskeleton-associated protein 4	6.64386
Nup153	nuclear pore complex protein Nup153	6.64386
Vapb	vesicle-associated membrane protein-associated protein B	6.64386
Efhd2	EF-hand domain-containing protein D2	6.64386
Pom121	nuclear envelope pore membrane protein POM 121	6.64386
Mtdh	protein LYRIC	6.64386
Vapa	vesicle-associated membrane protein-associated protein A	6.64386
Nup133	nuclear pore complex protein Nup133	6.64386
Ptpn2	tyrosine-protein phosphatase non-receptor type 2	6.64386
Clint1	clathrin interactor 1	6.64386
Syne1	nesprin-1	6.64386
Senp2	sentrin-specific protease 2	6.64386
Syne3	nesprin-3	6.64386
Ano6	anoctamin-6	6.64386
Igf2r	cation-independent mannose-6-phosphate receptor precursor	6.64386
Itpr3	inositol 1,4,5-trisphosphate receptor type 3	6.64386
Pdcd11	protein RRP5 homolog	6.64386
Rrbp1	ribosome-binding protein 1	6.64386
Syne2	nesprin-2	6.64386
Tmem214	transmembrane protein 214	6.33689
Nup98	nuclear pore complex protein Nup98-Nup96	6.08529
Emd	emerin	6.07907
Vangl1	vang-like protein 1	6.01099
Ssfa2	sperm-specific antigen 2 homolog	5.68025
Prr14	proline-rich protein 14	5.65991
Lmna	prelamin-A/C	5.40987
Lbr	lamin-B receptor	5.30071
Atp6ap2	renin receptor precursor	5.26986
Pgrmc2	membrane-associated progesterone receptor component 2	4.89695
Senp1	sentrin-specific protease 1	4.81844
Nup107	nuclear pore complex protein Nup107	4.80421
Arl6ip6	ADP-ribosylation factor-like protein 6-interacting protein 6	4.77984
Cdkal1	threonylcarbamoyladenosine tRNA methylthiotransferase	4.60398
Nup88	nuclear pore complex protein Nup88	4.21482
Ahctf1	protein ELYS	3.69443
Vamp1	vesicle-associated membrane protein 1	3.11453
Nup93	nuclear pore complex protein Nup93	3.0878
Pcx	pyruvate carboxylase, mitochondrial	2.85609	Mitochondrial, endogenously biotinylated
Hmgn3	high mobility group nucleosome-binding domain-containing protein 3	2.74351
Wwox	WW domain-containing oxidoreductase	2.30772
Nup50	nuclear pore complex protein Nup50	2.18365
Zc3hav1	zinc finger CCCH-type antiviral protein 1	1.63738
Seh1l	nucleoporin SEH1	1.4813
Myof	myoferlin	1.15316
Nup214	nuclear pore complex protein Nup214	1.00432

## Sheet: Protein level view
Gene symbol	Gene ID	Database ID	RefSeq Accession	Protein Description	# Lysines	MW [kDa]	calc. pI	Abundance Ratio: (Lap2_BioID) / (m6A-Tracer-BioID alone) - Log2(Median ratio)	LAP2 BioID - #Biotin sites	m6A-tracer-BioID alone - #Biotin sites	LAP2 BioID - Biotin sites	m6A-tracer-BioID alone - Biotin sites	LAP2 BioID - Total #PSMs	m6A-tracer-BioID alone - Total #PSMs	# Biotin Sites Total for Experiment	Biotin Sites Total for Experiment
Tmpo	21917	121949769	NP_001073601.1	lamina-associated polypeptide 2	31	38.5	9.17	6.64386	18	5	15; 17; 34; 97; 100; 106; 147; 194; 197; 202; 206; 212; 224; 236; 258; 279; 283; X	34; 206; 212; 279; 283	327	7	18	15; 17; 34; 97; 100; 106; 147; 194; 197; 202; 206; 212; 224; 236; 258; 279; 283; X
BirA_LAP2B	N/A	N/A	N/A	Bait	55	87.1	8.85	6.64386	28	14	4; 194; 288; 294; 318; 349; 351; 368; 431; 434; 440; 481; 528; 531; 536; 540; 546; 593; 619; 636; 656; 657; 667; 679; 701; 722; 726; X	194; 288; 294; 368; 540; 546; 619; 636; 656; 657; 667; 722; 726; X	575	36	28	4; 194; 288; 294; 318; 349; 351; 368; 431; 434; 440; 481; 528; 531; 536; 540; 546; 593; 619; 636; 656; 657; 667; 679; 701; 722; 726; X
Tmpo	21917	121949760	NP_035735.2	lamina-associated polypeptide 2	47	75.1	8.05	6.64386	12	3	15; 17; 34; 97; 100; 106; 147; 241; 262; 267; 288; X	34; 262; 288	139	7	12	15; 17; 34; 97; 100; 106; 147; 241; 262; 267; 288; X
Sec61b	66212	13324684	NP_077133.1	protein transport protein Sec61 subunit beta	4	10	11.56	6.64386	1	0	20		1	0	1	20
Lemd3	380664	145864461	NP_001074662.2	inner nuclear membrane protein Man1	42	100.1	7.55	6.64386	9	0	281; 296; 370; 446; 453; 695; 763; 770; X		23	0	9	281; 296; 370; 446; 453; 695; 763; 770; X
Lmnb1	16906	188219589	NP_034851.2	lamin-B1	38	66.7	5.16	6.64386	5	0	50; 272; 390; 529; 533		7	0	5	50; 272; 390; 529; 533
Lmnb2	16907	113195686	NP_034852.2	lamin-B2	35	67.3	5.5	6.64386	4	0	381; 465; 492; 496		5	0	4	381; 465; 492; 496
Tmem199	195040	72384367	NP_954669.2	transmembrane protein 199	9	23.1	9.1	6.64386	1	0	107		2	0	1	107
Vrk2	69922	568970467	XP_006514864.1	serine/threonine-protein kinase VRK2	40	58.1	9.04	6.64386	4	0	328; 341; 346; 358		6	0	4	328; 341; 346; 358
Sun1	77053	568938833	XP_006504821.1	SUN domain-containing protein 1	43	105.2	7.05	6.64386	4	0	129; 140; 175; 308		21	0	4	129; 140; 175; 308
Slc39a7	14977	118150668	NP_001071177.1	zinc transporter SLC39A7 precursor	12	50.6	6.87	6.64386	1	0	288		2	0	1	288
Ndc1	72787	28077005	NP_082631.1	nucleoporin NDC1	25	75.4	8.9	6.64386	2	0	429; 436		6	0	2	429; 436
Sun2	223697	329299035	NP_001192274.1	SUN domain-containing protein 2	27	81.6	7.02	6.64386	2	0	52; X		14	0	2	52; X
Tor1aip1	208263	229608946	NP_001153490.1	torsin-1A-interacting protein 1	27	64.8	7.14	6.64386	2	0	89; 123		2	0	2	89; 123
Smpd4	77626	568996564	XP_006522783.1	sphingomyelin phosphodiesterase 4	32	96.7	8.32	6.64386	2	0	267; 317		3	0	2	267; 317
Ube2j1	56228	31980960	NP_062532.2	ubiquitin-conjugating enzyme E2 J1	16	35	6.99	6.64386	1	0	8		4	0	1	8
Ckap4	216197	62526118	NP_780660.1	cytoskeleton-associated protein 4	38	63.7	5.64	6.64386	2	0	21; 35		4	0	2	21; 35
Nup153	218210	254588102	NP_786925.2	nuclear pore complex protein Nup153	96	151.9	8.84	6.64386	5	1	264; 372; 385; 597; 609	597	10	2	5	264; 372; 385; 597; 609
Vapb	56491	31543940	NP_062780.2	vesicle-associated membrane protein-associated protein B	21	26.9	7.78	6.64386	1	0	X		2	0	1	X
Efhd2	27984	31981086	NP_080270.2	EF-hand domain-containing protein D2	22	26.8	5.14	6.64386	1	0	197		1	0	1	197
Pom121	107939	156231054	NP_683734.2	nuclear envelope pore membrane protein POM 121	45	120.9	10.2	6.64386	2	0	135; 402		3	0	2	135; 402
Mtdh	67154	568990625	XP_006520213.1	protein LYRIC	71	60.1	9.48	6.64386	3	0	260; 263; 455		6	0	3	260; 263; 455
Vapa	30960	569000519	XP_006524448.1	vesicle-associated membrane protein-associated protein A	26	31.7	8.59	6.64386	1	0	192		2	0	1	192
Nup133	234865	283806543	NP_758492.2	nuclear pore complex protein Nup133	54	128.5	5.2	6.64386	2	0	508; 1088		6	0	2	508; 1088
Ptpn2	19255	187608416	NP_001120649.1	tyrosine-protein phosphatase non-receptor type 2	29	47.3	8.37	6.64386	1	0	312		1	0	1	312
Clint1	216705	568972933	XP_006532901.1	clathrin interactor 1	41	69.7	6.65	6.64386	1	0	6		1	0	1	6
Syne1	64009	119120865	NP_001073154.1	nesprin-1	187	344.3	5.24	6.64386	4	0	9; 23; 2554; 2573		5	0	4	9; 23; 2554; 2573
Senp2	75826	568996500	XP_006522751.1	sentrin-specific protease 2	50	68.2	9.64	6.64386	1	0	133		1	0	1	133
Syne3	212073	755542410	XP_006515715.2	nesprin-3	54	112	6.33	6.64386	1	0	774		4	0	1	774
Ano6	105722	359465539	NP_001240742.1	anoctamin-6	56	108.4	6.79	6.64386	1	0	188		1	0	1	188
Igf2r	16004	133778978	NP_034645.2	cation-independent mannose-6-phosphate receptor precursor	138	273.6	5.71	6.64386	1	0	X		3	0	1	X
Itpr3	16440	568999131	XP_006523775.1	inositol 1,4,5-trisphosphate receptor type 3	163	318.4	6.99	6.64386	1	0	1671		2	0	1	1671
Syne1	64009	755532685	XP_011241385.1	nesprin-1	672	1010.8	5.58	6.64386	4	0	5796; 8330; 8355; 8374		5	0	4	5796; 8330; 8355; 8374
Pdcd11	18572	54607128	NP_035183.2	protein RRP5 homolog	170	207.6	8.75	6.64386	1	0	58		1	0	1	58
Rrbp1	81910	124486712	NP_077243.2	ribosome-binding protein 1	206	158.3	9.19	6.64386	1	0	166		1	0	1	166
Syne2	319565	145699091	NP_001005510.2	nesprin-2	509	782.2	5.33	6.64386	2	0	6477; 6482		7	0	2	6477; 6482
Tmem214	68796	31559970	NP_653108.2	transmembrane protein 214	42	76.4	9.29	6.33689	1	0	66		3	0	1	66
Nup98	269966	568950761	XP_006507958.1	nuclear pore complex protein Nup98-Nup96	83	197.2	6.15	6.08529	2	0	639; 1051		4	0	2	639; 1051
Emd	13726	6679641	NP_031953.1	emerin	10	29.4	5.01	6.07907	4	0	89; 104; 116; X		10	0	4	89; 104; 116; X
Vangl1	229658	260099697	NP_808213.2	vang-like protein 1	26	60	8.81	6.01099	1	0	312		8	0	1	312
Ssfa2	70599	194473671	NP_542125.3	sperm-specific antigen 2 homolog	56	136.9	5.26	5.68025	2	0	300; 580		3	0	2	300; 580
Prr14	233895	34328357	NP_663564.2	proline-rich protein 14	27	67.8	9.94	5.65991	2	1	189; 329	329	2	1	2	189; 329
Lmna	16905	568921945	XP_006501136.1	prelamin-A/C	39	74.2	6.98	5.40987	5	1	208; 233; 420; 450; X	208	19	1	5	208; 233; 420; 450; X
Lbr	98386	568911330	XP_006497134.1	lamin-B receptor	35	71.4	9.36	5.30071	6	3	64; 126; 133; 159; 200; 535	126; 133; 159	98	9	6	64; 126; 133; 159; 200; 535
Atp6ap2	70495	21361250	NP_081715.1	renin receptor precursor	14	39.1	5.54	5.26986	1	0	346		7	0	1	346
Pgrmc2	70804	226442772	NP_081834.1	membrane-associated progesterone receptor component 2	12	23.3	5.15	4.89695	2	0	129; X		16	0	2	129; X
Senp1	223870	568992265	XP_006520943.1	sentrin-specific protease 1	46	78.8	8.69	4.81844	1	0	168		3	0	1	168
Nup107	103468	29789351	NP_598771.1	nuclear pore complex protein Nup107	49	106.7	5.43	4.80421	1	0	786		2	0	1	786
Arl6ip6	65103	254281227	NP_075365.3	ADP-ribosylation factor-like protein 6-interacting protein 6	7	24.9	7.77	4.77984	1	0	86		1	0	1	86
Cdkal1	68916	21617853	NP_653119.1	threonylcarbamoyladenosine tRNA methylthiotransferase	43	65.2	7.65	4.60398	2	0	37; 64		2	0	2	37; 64
Nup88	19069	134053894	NP_001076800.1	nuclear pore complex protein Nup88	45	84.9	6.27	4.21482	1	1	228	228	1	1	1	228
Ahctf1	226747	568910764	XP_006496863.1	protein ELYS	128	254.6	6.65	3.69443	10	1	1328; 1337; 1352; 1382; 1745; 1771; 2078; 2267; 2307; X	X	33	1	10	1328; 1337; 1352; 1382; 1745; 1771; 2078; 2267; 2307; X
Vamp1	22317	6678549	NP_033522.1	vesicle-associated membrane protein 1	7	12.9	6.65	3.11453	1	0	54		1	0	1	54
Nup93	71805	27369533	NP_765998.1	nuclear pore complex protein Nup93	40	93.2	5.72	3.0878	1	1	59	59	1	1	1	59
Pcx	18563	251823980	NP_001156418.1	pyruvate carboxylase, mitochondrial	58	129.7	6.71	2.85609	1	1	1145	1145	37	22	1	1145
Hmgn3	94353	568962379	XP_006511654.1	high mobility group nucleosome-binding domain-containing protein 3	19	14	9.86	2.74351	0	1		120	0	1	1	120
Wwox	80707	31980962	NP_062519.2	WW domain-containing oxidoreductase	18	46.5	7.02	2.30772	1	1	28	28	7	3	1	28
Nup50	18141	38016154	NP_057923.2	nuclear pore complex protein Nup50	45	49.5	6.24	2.18365	1	0	59		2	0	1	59
Zc3hav1	78781	568943224	XP_006506842.1	zinc finger CCCH-type antiviral protein 1	55	112.5	8.07	1.63738	2	0	504; 556		3	0	2	504; 556
Seh1l	72124	569004573	XP_006526341.1	nucleoporin SEH1	19	46.1	7.84	1.4813	1	0	96		1	0	1	96
Myof	226101	569007058	XP_006527057.1	myoferlin	146	236.4	6.23	1.15316	1	1	1365	1365	2	1	1	1365
Nup214	227720	568913494	XP_006498008.1	nuclear pore complex protein Nup214	89	213	7.08	1.00432	2	1	1079; 1155	1155	4	1	2	1079; 1155
Rpl4	67891	30794450	NP_077174.1	60S ribosomal protein L4	56	47.1	11	0.88049	1	0	364		1	0	1	364
Mccc1	72039	186700620	NP_076133.3	methylcrotonoyl-CoA carboxylase subunit alpha, mitochondrial	44	79.3	7.83	0.77484	1	1	677	677	18	8	1	677
Ranbp2	19386	153792534	NP_035370.2	E3 SUMO-protein ligase RanBP2	257	340.9	6.18	0.703987	20	15	5; 776; 982; 996; 1133; 1448; 1695; 1703; 1721; 1822; 2002; 2011; 2015; 2018; 2303; 2351; 2360; 2430; 2594; X	5; 812; 982; 996; 1133; 1448; 1721; 1993; 2002; 2018; 2303; 2351; 2360; 2430; X	44	31	22	5; 776; 812; 982; 996; 1133; 1448; 1695; 1703; 1721; 1822; 1993; 2002; 2011; 2015; 2018; 2303; 2351; 2360; 2430; 2594; X
Rpl29	19944	6677781	NP_033108.1	60S ribosomal protein L29	32	17.6	11.84	0.362891	2	1	151; 158	158	3	1	2	151; 158
Snd1	56463	77404392	NP_062750.2	staphylococcal nuclease domain-containing protein 1	57	102	7.43	0.0962619	1	1	497	497	1	1	1	497
Cyb5a	109672	13385268	NP_080073.1	cytochrome b5	10	15.2	5.07	0	1	0	33		1	0	1	33
Rpl24	68193	18250296	NP_077180.1	60S ribosomal protein L24	27	17.8	11.25	-0.47694	1	1	141	147	1	1	2	141; 147
Wdr60	217935	568979469	XP_006515843.1	WD repeat-containing protein 60	85	119.2	7.3	-0.516636	0	1		413	0	1	1	413
Tpr	108989	270309140	NP_598541.3	nucleoprotein TPR	176	273.8	5.03	-0.556393	1	1	464	464	10	12	1	464
Rps3a1	20091	254553321	NP_058655.3	40S ribosomal protein S3a	38	29.9	9.73	-0.650635	1	1	249	249	1	2	1	249
Mllt4	17356	568999211	XP_006523815.1	afadin	121	216.8	6.51	-0.673463	1	1	1734	1734	2	2	1	1734
Rpl19	19921	226958653	NP_033104.2	60S ribosomal protein L19	32	23.5	11.47	-0.72261	0	1		196	0	1	1	196
Rangap1	19387	568991782	XP_006520709.1	ran GTPase-activating protein 1	39	68.7	4.6	-0.77967	2	3	63; 502	63; 463; 502	3	5	3	63; 463; 502
Cbx5	12419	116008461	NP_001070257.1	chromobox protein homolog 5	29	22.2	5.86	-0.913216	1	1	190	190	1	1	1	190
Hist2h2bb	319189	68226433	NP_783597.2	histone H2B type 2-B	20	13.9	10.32	-0.915936	4	4	21; 86; 109; X	21; 109; 117; X	9	12	5	21; 86; 109; 117; X
Sf3a1	67465	165932270	NP_080451.4	splicing factor 3A subunit 1	58	88.5	5.22	-1.14242	0	1		531	0	1	1	531
Erc1	111173	568940315	XP_006505434.1	ELKS/Rab6-interacting/CAST family member 1	110	128.3	5.91	-1.18442	0	1		187	0	1	1	187
Hist1h3a	360198	32880233	NP_038578.2	histone H3.1	13	15.4	11.12	-1.18606	4	5	5; 19; 24; 28	5; 19; 24; 28; 123	8	11	5	5; 19; 24; 28; 123
Hist1h3d	319149	30061337	NP_835511.1	histone H3.2	13	15.4	11.27	-1.18606	4	5	5; 19; 24; 28	5; 19; 24; 28; 123	8	11	5	5; 19; 24; 28; 123
Hmgn1	15312	41406074	NP_032277.3	non-histone chromosomal protein HMG-14	19	10.1	9.76	-1.21759	0	1		31	0	2	1	31
LOC102641436	102641436	568897055	XP_006542900.1	eukaryotic translation initiation factor 5	49	48.9	5.52	-1.28983	1	1	411	411	1	1	1	411
H2afx	15270	7106331	NP_034566.1	histone H2AX	13	15.1	10.74	-1.33097	1	2	X	128; X	4	5	2	128; X
Hist1h2bp	319188	160420308	NP_835509.2	histone H2B type 1-P	21	15.6	10.24	-1.35476	4	4	21; 86; 109; X	21; 109; 117; X	6	7	5	21; 86; 109; 117; X
Hist1h2bb	319178	28316760	NP_783595.1	histone H2B type 1-B	20	13.9	10.32	-1.35476	3	4	86; 109; X	21; 109; 117; X	5	7	5	21; 86; 109; 117; X
C330007P06Rik	77644	569009123	XP_006541473.1	UPF0428 protein CXorf56 homolog	22	26.3	7.64	-1.37333	1	1	128	128	5	6	1	128
Orc3	50793	227116261	NP_056639.3	origin recognition complex subunit 3	56	82.3	7.4	-1.37707	1	2	530	530; 538	1	3	2	530; 538
Pdap1	231887	84781781	NP_001028485.1	28 kDa heat- and acid-stable phosphoprotein	27	20.6	7.39	-1.44222	0	1		181	0	1	1	181
Pinx1	72400	18129616	NP_082504.1	PIN2/TERF1-interacting telomerase inhibitor 1	53	37.2	9.63	-1.44615	0	2		43; X	0	3	2	43; X
Hist1h4k	319160	30061359	NP_835583.1	histone H4	11	11.4	11.36	-1.47393	3	5	9; 13; X	9; 13; 21; 92; X	16	26	5	9; 13; 21; 92; X
Bop1	12181	7304931	NP_038509.1	ribosome biogenesis protein BOP1	30	82.5	6.28	-1.59074	0	1		325	0	3	1	325
Ktn1	16709	568986868	XP_006518690.1	kinectin	163	152.4	5.9	-1.60823	1	1	150	1272	1	1	2	150; 1272
Pabpn1	54196	9506945	NP_062275.1	polyadenylate-binding protein 2	10	32.3	5.17	-1.68966	1	1	203	203	1	2	1	203
Cald1	109624	21704156	NP_663550.1	caldesmon	62	60.4	7.37	-1.68966	5	12	378; 383; 450; 495; X	113; 241; 373; 378; 383; 411; 450; 455; 489; 495; 529; X	8	23	12	113; 241; 373; 378; 383; 411; 450; 455; 489; 495; 529; X
Cald1	109624	568940266	XP_006505411.1	caldesmon	89	89.8	5.5	-1.68966	6	12	439; 620; 625; 692; 737; X	119; 439; 483; 615; 620; 625; 653; 692; 697; 731; 737; X	10	24	12	119; 439; 483; 615; 620; 625; 653; 692; 697; 731; 737; X
Hmgn2	15331	8393534	NP_058653.1	non-histone chromosomal protein HMG-17	22	9.4	9.99	-1.83136	2	2	90; X	90; X	3	3	2	90; X
Cdca7	66953	21313220	NP_080142.1	cell division cycle-associated protein 7	24	43.8	8.6	-1.84944	1	1	17	17	1	3	1	17
Sqstm1	18412	6754954	NP_035148.1	sequestosome-1	21	48.1	5.21	-1.8625	0	1		437	0	2	1	437
Zmat2	66492	13385046	NP_079870.1	zinc finger matrin-type protein 2	34	23.6	9.01	-1.90509	1	1	64	64	1	1	1	64
2310036O22Rik	68544	85362708	NP_081036.2	uncharacterized protein C19orf43 homolog	17	18.4	9.67	-1.91866	1	1	143	143	1	3	1	143
Tpx2	72119	568918482	XP_006500277.1	targeting protein for Xklp2	97	85.8	9.38	-1.96016	3	7	258; 492; X	258; 492; 523; 566; 708; 739; X	12	21	7	258; 492; 523; 566; 708; 739; X
Sipa1	20469	257153348	NP_001157952.1	signal-induced proliferation-associated protein 1	25	112.2	6.44	-1.96578	0	1		801	0	2	1	801
Hnrnpdl	50926	148664250	NP_057899.2	heterogeneous nuclear ribonucleoprotein D-like	28	46.2	9.57	-2.05889	0	1		302	0	2	1	302
Ik	24010	33468955	NP_036009.1	protein Red	65	65.6	6.64	-2.13924	2	2	164; 173	164; 173	2	5	2	164; 173
Rnps1	19826	121674793	NP_033096.2	RNA-binding protein with serine-rich domain 1	29	34.2	11.84	-2.15843	1	1	X	X	4	8	1	X
Prrc2a	53761	92110037	NP_064411.2	protein PRRC2A	99	229.1	9.39	-2.15843	0	2		49; 788	0	2	2	49; 788
Wdr70	545085	124487149	NP_001074871.1	WD repeat-containing protein 70	48	73	6.05	-2.15843	0	1		593	0	1	1	593
Fus	233908	20982845	NP_631888.1	RNA-binding protein FUS	14	52.6	9.36	-2.191	0	1		358	0	2	1	358
Tfe3	209446	157384990	NP_766060.2	transcription factor E3	19	61.4	5.59	-2.20091	1	1	177	177	2	7	1	177
Erh	13877	755542186	XP_011242297.1	enhancer of rudimentary homolog	8	16.6	5.59	-2.22432	0	1		145	0	2	1	145
Hnrnpf	98758	261878607	NP_001159904.1	heterogeneous nuclear ribonucleoprotein F	16	45.7	5.49	-2.31473	1	1	224	224	2	3	1	224
Surf6	20935	6678185	NP_033324.1	surfeit locus protein 6	58	41.2	10.52	-2.35845	1	1	122	122	4	6	1	122
Hmga1	15361	86198323	NP_057869.2	high mobility group protein HMG-I/HMG-Y	16	11.6	10.32	-2.36959	2	3	74; X	15; 74; X	9	8	3	15; 74; X
Hmga1	15361	262331580	NP_001160009.1	high mobility group protein HMG-I/HMG-Y	16	10.6	10.32	-2.36959	2	3	63; X	15; 63; X	9	8	3	15; 63; X
Vim	22352	31982755	NP_035831.2	vimentin	22	53.7	5.12	-2.45799	2	5	439; 445	104; 143; 294; 439; 445	16	34	5	104; 143; 294; 439; 445
Zfp280c	208968	40254197	NP_705760.2	zinc finger protein 280C	74	83.1	9.06	-2.47393	1	2	186	180; 186	1	6	2	180; 186
Psip1	101739	19527168	NP_598709.1	PC4 and SFRS1-interacting protein	83	59.7	9.13	-2.47794	2	3	200; X	200; 302; X	3	6	3	200; 302; X
Ahnak2	100041194	568899234	XP_006543088.1	protein AHNAK2	149	209.3	5.95	-2.48197	0	3		592; 602; 606	0	5	3	592; 602; 606
Top2a	21973	568973595	XP_006533216.1	DNA topoisomerase 2-alpha	175	172.7	8.6	-2.50635	0	1		1480	0	1	1	1480
Tfeb	21425	239835744	NP_035679.3	transcription factor EB	21	59.4	5.54	-2.53116	1	1	149	149	1	2	1	149
Ddx5	13207	568971472	XP_006532198.1	probable ATP-dependent RNA helicase DDX5	34	69.2	8.92	-2.57347	1	1	470	470	1	3	1	470
Cwc15	66070	568959923	XP_006510600.1	spliceosome-associated protein CWC15 homolog	23	26.6	5.71	-2.58208	1	1	40	40	4	5	1	40
Tjp1	21872	568947647	XP_006540841.1	tight junction protein ZO-1	118	209.6	7.25	-2.64386	0	1		1449	0	2	1	1449
Slu7	193116	27477103	NP_683514.2	pre-mRNA-splicing factor SLU7	70	68	7.08	-2.662	0	1		358	0	2	1	358
Serbp1	66870	165932375	NP_080090.2	plasminogen activator inhibitor 1 RNA-binding protein	35	44.7	8.54	-2.81604	2	2	122; 302	122; 302	3	7	2	122; 302
Shroom4	208431	569008587	XP_006527610.1	protein Shroom4	91	165	6.84	-2.88897	1	1	555	555	3	9	1	555
Rsl24d1	225215	38348464	NP_941011.1	probable ribosome biogenesis protein RLP24	28	19.6	9.98	-2.88897	0	1		128	0	1	1	128
Knop1	66356	158966725	NP_075686.2	lysine-rich nucleolar protein 1	88	59.6	9.98	-2.9885	1	1	516	516	3	5	1	516
Nono	53610	357394934	NP_001239447.1	non-POU domain-containing octamer-binding protein	27	54.5	8.95	-3.07097	2	4	5; 373	5; 192; 251; 373	2	11	4	5; 192; 251; 373
Khdrbs1	20218	110626031	NP_035447.3	KH domain-containing, RNA-binding, signal transduction-associated protein 1	25	48.3	8.72	-3.09542	0	2		21; 432	0	5	2	21; 432
Smchd1	74355	148839318	NP_083163.3	structural maintenance of chromosomes flexible hinge domain-containing protein 1	162	225.5	7.24	-3.1078	1	1	1977	1977	2	3	1	1977
Wdr18	216156	83649741	NP_780659.2	WD repeat-containing protein 18	16	47.2	6.89	-3.13289	0	1		431	0	1	1	431
Nat10	98956	23346561	NP_694766.1	N-acetyltransferase 10	73	115.3	8.32	-3.15843	0	2		88; 922	0	2	2	88; 922
Myo1c	17913	568972076	XP_006532492.1	unconventional myosin-Ic	67	121.9	9.35	-3.17137	0	1		532	0	2	1	532
Rbmx2	209003	27734072	NP_775552.1	RNA-binding motif protein, X-linked 2	42	37.5	9.72	-3.22432	0	1		6	0	1	1	6
Snw1	66354	146149191	NP_079783.2	SNW domain-containing protein 1	53	61.4	9.48	-3.23786	0	3		95; 153; 193	0	4	3	95; 153; 193
Rrs1	59014	227908779	NP_067486.2	ribosome biogenesis regulatory protein homolog	43	41.5	10.77	-3.35107	1	1	198	198	2	4	1	198
Flna	192176	569009889	XP_006527974.1	filamin-A	160	281	6.04	-3.35107	0	1		916	0	1	1	916
Zc3h18	76014	568957777	XP_006531532.1	zinc finger CCCH domain-containing protein 18	81	112.4	8.44	-3.36587	0	2		365; 956	0	3	2	365; 956
Mecp2	17257	126517469	NP_001075448.1	methyl-CpG-binding protein 2	64	53.5	9.88	-3.38082	1	1	338	338	3	7	1	338
Nup205	70699	568942833	XP_006506652.1	nuclear pore complex protein Nup205	86	233.2	6.51	-3.38082	1	1	1985	1985	1	1	1	1985
Pnn	18949	112420990	NP_032917.2	pinin	61	82.5	7.01	-3.50635	3	3	108; 109; 212	108; 109; 212	4	8	4	1; 108; 109; 212
LOC105243690	105243690	755490560	XP_011236511.1	nucleophosmin-like	26	19.1	5.2	-3.53952	4	8	62; 66; 75; 85	75; 85; 95; 120; 135; 139; 145; X	4	13	10	62; 66; 75; 85; 95; 120; 135; 139; 145; X
Esf1	66580	568918050	XP_006500074.1	ESF1 homolog	127	98	5.05	-3.54793	1	1	721	721	1	6	1	721
Cbx3	12417	108860695	NP_031650.3	chromobox protein homolog 3	25	20.8	5.33	-3.55639	0	1		44	0	1	1	44
Lyar	17089	568933823	XP_006503825.1	cell growth-regulating nucleolar protein	66	43.7	9.5	-3.59074	0	1		61	0	1	1	61
Raly	19383	213417799	NP_001132984.1	RNA-binding protein Raly short	22	31.2	9.38	-3.60823	0	2		130; 149	0	3	2	130; 149
Smarca5	93762	40254124	NP_444354.2	SWI/SNF-related matrix-associated actin-dependent regulator of chromatin subfamily A member 5	94	121.6	8.15	-3.75633	1	1	723	723	2	8	1	723
Puf60	67959	76677895	NP_598452.2	poly(U)-binding-splicing factor PUF60	32	58.5	5.35	-3.75633	0	1		442	0	6	1	442
Whsc1	107823	295424164	NP_001074571.2	histone-lysine N-methyltransferase NSD2	134	152.3	8.51	-3.79586	0	2		14; X	0	3	2	14; X
Npm1	18148	356582426	NP_001239190.1	nucleophosmin	29	28.4	4.69	-3.8365	3	6	201; 211; X	201; 211; 221; 246; 248; X	8	32	6	201; 211; 221; 246; 248; X
Hist1h1c	50708	9845257	NP_056601.1	histone H1.2	58	21.3	11	-3.8365	1	2	190	190; X	1	4	2	190; X
Ccnt1	12455	6753316	NP_033963.1	cyclin-T1	47	80.5	8.68	-3.86775	1	2	484	484; 556	1	3	2	484; 556
Alyref	21681	6755763	NP_035698.1	THO complex subunit 4	11	26.9	11.15	-3.92139	1	1	85	85	1	3	1	85
Maff	17133	756761817	NP_001291760.1	transcription factor MafF	14	19.8	10.05	-3.96578	0	1		169	0	2	1	169
Ddx3x	13205	6753620	NP_034158.1	ATP-dependent RNA helicase DDX3X	32	73.1	7.18	-4.01159	0	1		81	0	1	1	81
Sart1	20227	124244096	NP_058578.3	U4/U6.U5 tri-snRNP-associated protein 1	76	90.8	5.82	-4.02327	0	2		654; 663	0	3	2	654; 663
Plec	18810	254675265	NP_958796.2	plectin	262	517	5.8	-4.03505	1	9	430	430; 1578; 1585; 2256; 2424; 2490; 2496; 2912; 4468	2	18	9	430; 1578; 1585; 2256; 2424; 2490; 2496; 2912; 4468
Plec	18810	254675115	NP_001157012.1	plectin	264	533.9	5.96	-4.03505	1	9	578	578; 1726; 1733; 2404; 2572; 2638; 2644; 3060; 4616	2	18	9	578; 1726; 1733; 2404; 2572; 2638; 2644; 3060; 4616
Nol8	70930	406353182	NP_001258326.1	nucleolar protein 8	132	130.6	6.51	-4.04692	0	2		286; 1069	0	4	2	286; 1069
Hp1bp3	15441	171846285	NP_001116369.1	heterochromatin protein 1-binding protein 3	78	60.8	9.7	-4.08314	0	1		X	0	2	1	X
Racgap1	26934	6755266	NP_036155.1	rac GTPase-activating protein 1	48	70.1	8.51	-4.1078	0	1		620	0	2	1	620
Atxn2l	233871	755522553	XP_011240077.1	ataxin-2-like protein	44	115.8	8.66	-4.13289	0	1		532	0	1	1	532
Bcl7c	12055	568949472	XP_006507332.1	B-cell CLL/lymphoma 7 protein family member C	13	26.3	10.65	-4.13289	0	1		27	0	1	1	27
Cttn	13043	75677414	NP_031829.2	src substrate cortactin	50	61.2	5.4	-4.2109	2	6	107; 255	107; 235; 255; 309; 336; 346	2	7	6	107; 235; 255; 309; 336; 346
Larp7	28036	110665742	NP_613059.2	la-related protein 7	88	64.8	9.54	-4.22432	0	2		392; 556	0	2	2	392; 556
Rif1	51869	146231944	NP_780447.4	telomere-associated protein RIF1	188	267	5.6	-4.23786	1	7	1177	1049; 1077; 1177; 1276; 2041; 2155; 2337	1	14	7	1049; 1077; 1177; 1276; 2041; 2155; 2337
Orc2	18393	6679176	NP_032791.1	origin recognition complex subunit 2	48	65.9	6.81	-4.23786	1	2	154	154; 250	1	4	2	154; 250
Chd1	12648	239985588	NP_031716.2	chromodomain-helicase-DNA-binding protein 1	155	196.3	7.37	-4.23786	0	1		399	0	2	1	399
Epb4.1l1	13821	568915341	XP_006498771.1	band 4.1-like protein 1	99	174.6	5.39	-4.26534	0	1		536	0	1	1	536
Ibtk	108837	124486857	NP_001074751.1	inhibitor of Bruton tyrosine kinase	106	149.5	7.72	-4.29336	0	1		1145	0	1	1	1145
Ebna1bp2	69072	21312728	NP_081208.1	probable rRNA-processing protein EBP2	45	34.7	10.08	-4.32193	0	2		33; 209	0	2	2	33; 209
Gnl2	230737	240120093	NP_663527.2	nucleolar GTP-binding protein 2	76	83.3	9.2	-4.32193	0	1		131	0	1	1	131
Mybbp1a	18432	31982724	NP_058056.2	myb-binding protein 1A	106	151.9	8.95	-4.32193	0	2		1297; 1302	0	8	2	1297; 1302
Sdpr	20324	20270267	NP_620080.1	serum deprivation-response protein	36	46.7	5.21	-4.32193	0	1		261	0	3	1	261
S100a6	20200	6755392	NP_035443.1	protein S100-A6	10	10	5.48	-4.38082	0	1		47	0	1	1	47
Zfp512	269639	254553392	NP_766581.2	zinc finger protein 512	63	63.9	9.51	-4.4112	0	1		79	0	1	1	79
Ruvbl1	56505	9790083	NP_062659.1	ruvB-like 1	41	50.2	6.42	-4.44222	0	1		2	0	12	1	2
Snrpa1	68981	228480232	NP_067311.4	U2 small nuclear ribonucleoprotein A'	21	28.3	8.62	-4.45799	1	1	205	205	4	13	1	205
Ddx21	56200	72384374	NP_062426.2	nucleolar RNA helicase 2	101	93.5	9.11	-4.47393	1	1	649	649	1	2	1	649
Fam32a	67922	13385950	NP_080731.1	protein FAM32A	24	13.2	9.94	-4.50635	0	1		107	0	2	1	107
Hcfc2	67933	755534989	XP_011241845.1	host cell factor 2	46	95.6	9.11	-4.50635	0	1		587	0	2	1	587
Top2b	21974	34328148	NP_033435.2	DNA topoisomerase 2-beta	187	181.8	8.29	-4.50635	0	1		1477	0	1	1	1477
Cpsf2	51786	568980060	XP_006516134.1	cleavage and polyadenylation specificity factor subunit 2	57	88.3	5.11	-4.53952	0	1		611	0	2	1	611
Rbm39	170791	118403314	NP_573505.2	RNA-binding protein 39	36	59.4	10.1	-4.53952	0	1		111	0	2	1	111
Lima1	65970	165905585	NP_001107017.1	LIM domain and actin-binding protein 1	66	84	6.6	-4.59074	0	5		186; 198; 203; 649; 719	0	6	5	186; 198; 203; 649; 719
Lima1	65970	158518433	NP_075550.2	LIM domain and actin-binding protein 1	52	66	5.91	-4.59074	0	5		26; 38; 43; 489; 559	0	6	5	26; 38; 43; 489; 559
Arhgap21	71435	568912535	XP_006497601.1	rho GTPase-activating protein 21	126	217.5	7.83	-4.60823	1	1	287	287	1	3	1	287
Top1	21969	112734855	NP_033434.2	DNA topoisomerase 1	133	90.8	9.33	-4.71786	0	1		150	0	2	1	150
Trip12	14897	755493353	XP_011236956.1	E3 ubiquitin-protein ligase TRIP12	128	229.5	8.59	-4.71786	0	1		1127	0	2	1	1127
Taf1	270627	595582247	NP_001277658.1	transcription initiation factor TFIID subunit 1	144	214.5	5.12	-4.75633	1	1	1556	1556	1	3	1	1556
Gtf3c4	269252	260436918	NP_766565.2	general transcription factor 3C polypeptide 4	52	91.6	6.73	-4.79586	0	1		119	0	1	1	119
Srsf11	69207	568923916	XP_006502078.1	serine/arginine-rich splicing factor 11	50	57.4	10.61	-4.79586	0	1		225	0	1	1	225
Baz1b	22385	170295818	NP_035844.2	tyrosine-protein kinase BAZ1B	161	170.5	8.6	-4.8365	2	3	297; X	297; 335; X	8	23	3	297; 335; X
2210018M11Rik	233545	568950187	XP_006507678.1	protein EMSY	80	141.9	9.33	-4.8365	0	1		1072	0	1	1	1072
Snrpe	20643	27883844	NP_033253.1	small nuclear ribonucleoprotein E	6	10.8	9.44	-4.87832	0	1		9	0	2	1	9
Tfip11	54723	10190660	NP_061253.2	tuftelin-interacting protein 11	63	96.2	5.9	-4.87832	0	1		278	0	2	1	278
Thrap3	230753	755508129	XP_011238805.1	thyroid hormone receptor-associated protein 3	99	108.1	10.17	-4.94342	0	3		452; 524; X	0	13	3	452; 524; X
Rbm10	236732	269847199	NP_001161248.1	RNA-binding protein 10	49	94.4	6.7	-5.01159	1	2	124	124; 843	4	14	2	124; 843
Rbm10	236732	21704124	NP_663602.1	RNA-binding protein 10	50	103.4	5.92	-5.01159	1	2	201	201; 920	4	14	2	201; 920
Hnrnpa2b1	53379	755517048	XP_006506436.2	heterogeneous nuclear ribonucleoproteins A2/B1	19	37.4	8.95	-5.01159	0	1		3	0	3	1	3
Pes1	64934	12584984	NP_075027.1	pescadillo homolog	56	67.8	6.84	-5.05889	0	1		546	0	4	1	546
Fip1l1	66899	568935060	XP_006504327.1	pre-mRNA 3'-end-processing factor FIP1	31	67.5	5.59	-5.1078	0	1		234	0	2	1	234
Fmr1	14265	51036613	NP_032057.2	fragile X mental retardation protein 1 homolog	41	68.8	7.42	-5.15843	0	1		371	0	1	1	371
Polr2a	20020	597517934	NP_001277997.1	DNA-directed RNA polymerase II subunit RPB1	105	217	7.37	-5.15843	0	1		992	0	4	1	992
Smarcc1	20588	112421097	NP_033237.2	SWI/SNF complex subunit SMARCC1	80	122.8	5.73	-5.26534	0	1		739	0	1	1	739
Tead1	21676	262205246	NP_001160056.1	transcriptional enhancer factor TEF-1	31	49.1	8.97	-5.32193	0	1		114	0	2	1	114
Mki67	17345	169234624	NP_001074586.2	antigen KI-67	312	350.7	9.72	-5.35107	1	10	1604	351; 508; 685; 748; 853; 945; 999; 1047; 1604; 2369	1	19	10	351; 508; 685; 748; 853; 945; 999; 1047; 1604; 2369
Ddx46	212880	530585119	NP_001268984.1	probable ATP-dependent RNA helicase DDX46	105	117.4	9.26	-5.35107	0	4		263; 895; 904; 908	0	7	4	263; 895; 904; 908
Sf3b2	319322	268837785	NP_084385.2	splicing factor 3B subunit 2	81	98.1	5.62	-5.44222	0	1		258	0	2	1	258
Nipbl	71175	568990286	XP_006520058.1	nipped-B-like protein	243	315.3	7.91	-5.50635	0	2		222; 959	0	2	2	222; 959
G3bp1	27041	7305075	NP_038744.1	ras GTPase-activating protein-binding protein 1	19	51.8	5.59	-5.57347	0	2		76; 374	0	2	2	76; 374
Ints12	71793	21313674	NP_082203.1	integrator complex subunit 12	53	48.5	9.69	-5.57347	0	1		360	0	4	1	360
Ncl	17975	84875537	NP_035010.3	nucleolin	90	76.7	4.75	-5.64386	2	8	102; X	3; 63; 102; 116; 132; 230; 478; X	2	27	8	3; 63; 102; 116; 132; 230; 478; X
Exosc10	50912	568931575	XP_006539086.1	exosome component 10	64	102	7.46	-5.64386	0	2		178; 716	0	2	2	178; 716
Rad18	58186	267844910	NP_001161202.1	E3 ubiquitin-protein ligase RAD18	44	62.5	6.68	-5.64386	0	2		127; 135	0	7	2	127; 135
Champ1	101994	568953079	XP_006508742.1	chromosome alignment-maintaining phosphoprotein 1	74	87.5	7.85	-5.71786	0	2		506; 546	0	4	2	506; 546
U2surp	67958	171460910	NP_001108449.1	U2 snRNP-associated SURP motif-containing protein	107	118.2	8.47	-5.79586	0	3		82; 88; X	0	5	3	82; 88; X
Mdn1	100019	568925788	XP_006537539.1	midasin	306	629.9	5.72	-5.8365	0	1		22	0	3	1	22
Sin3b	20467	568956372	XP_006530852.1	paired amphipathic helix protein Sin3b	67	128.8	6.95	-5.8365	0	1		1021	0	2	1	1021
Ep400	75560	755512930	XP_011247885.1	E1A-binding protein p400	160	347.5	9.25	-6.01159	0	2		1604; 3034	0	4	2	1604; 3034
Zbtb33	56805	118442830	NP_001072981.1	transcriptional regulator Kaiso	40	74	5.06	-6.01159	0	2		412; X	0	9	2	412; X
Cstf2	108062	569011221	XP_006528541.1	cleavage stimulation factor subunit 2	13	66.3	7.08	-6.05889	1	3	189	145; 189; 619	1	5	3	145; 189; 619
Cstf2t	83410	148277061	NP_112539.2	cleavage stimulation factor subunit 2 tau variant	16	65.8	7.25	-6.05889	0	3		145; 194; 622	0	4	3	145; 194; 622
Ppp1r10	52040	255308881	NP_001157290.1	serine/threonine-protein phosphatase 1 regulatory subunit 10	66	94.3	9.16	-6.15843	0	1		235	0	4	1	235
Yeats2	208146	568994852	XP_006521965.1	YEATS domain-containing protein 2	94	148.9	9.04	-6.26534	0	2		586; 891	0	4	2	586; 891
Kmt2b	75410	594542481	NP_001277502.1	histone-lysine N-methyltransferase 2B	121	295.7	8.03	-6.38082	0	3		805; 2195; 2201	0	9	3	805; 2195; 2201
Pogz	229584	755503733	XP_011238393.1	pogo transposable element with ZNF domain	71	154.8	7.52	-6.38082	0	1		867	0	12	1	867
Zfp871	208292	140969612	NP_766046.3	zinc finger protein 871	51	71.5	8.28	-6.38082	0	1		308	0	2	1	308
Tox4	268741	166706895	NP_075923.2	TOX high mobility group box family member 4	27	65.9	5.01	-6.64386	1	2	199	199; 492	2	18	2	199; 492
Sap30bp	57230	31560336	NP_065229.2	SAP30-binding protein	32	33.8	4.87	-6.64386	1	2	205	205; 220	1	5	2	205; 220
Numa1	101706	568949271	XP_006507236.1	nuclear mitotic apparatus protein 1	149	237.2	5.85	-6.64386	1	3	1762	1078; 1762; 1931	1	11	3	1078; 1762; 1931
Ahnak	66395	569007630	XP_006527317.1	neuroblast differentiation-associated protein AHNAK	790	596.6	6.32	-6.64386	3	83	1053; 1319; X	129; 184; 204; 245; 393; 503; 543; 562; 569; 633; 697; 713; 827; 890; 944; 996; 1011; 1053; 1065; 1183; 1190; 1193; 1252; 1267; 1309; 1316; 1319; 1328; 1384; 1391; 1445; 1507; 1519; 1582; 1628; 1697; 1761; 1775; 1823; 1885; 1889; 1892; 1903; 1966; 2228; 2239; 2302; 2369; 2380; 2497; 2508; 2522; 2556; 2818; 2825; 3024; 3065; 3075; 3086; 3277; 3898; 3964; 3967; 3978; 4120; 4169; 4219; 4226; 4303; 4…	6	188	83	129; 184; 204; 245; 393; 503; 543; 562; 569; 633; 697; 713; 827; 890; 944; 996; 1011; 1053; 1065; 1183; 1190; 1193; 1252; 1267; 1309; 1316; 1319; 1328; 1384; 1391; 1445; 1507; 1519; 1582; 1628; 1697; 1761; 1775; 1823; 1885; 1889; 1892; 1903; 1966; 2228; 2239; 2302; 2369; 2380; 2497; 2508; 2522; 2556; 2818; 2825; 3024; 3065; 3075; 3086; 3277; 3898; 3964; 3967; 3978; 4120; 4169; 4219; 4226; 4303; 4…
Acin1	56215	146231985	NP_075679.2	apoptotic chromatin condensation inducer in the nucleus	94	150.6	5.91	-6.64386	0	4		103; 823; 831; 985	0	7	4	103; 823; 831; 985
Acin1	56215	568988260	XP_006519359.1	apoptotic chromatin condensation inducer in the nucleus	94	150.6	5.91	-6.64386	0	3		103; 830; 984	0	5	3	103; 830; 984
Adnp	11538	851330596	NP_001297015.1	activity-dependent neuroprotector homeobox protein	98	124.2	6.86	-6.64386	0	2		203; 266	0	9	2	203; 266
Ankrd11	77087	323423025	NP_001074848.2	ankyrin repeat domain-containing protein 11	315	296	6.98	-6.64386	0	1		385	0	1	1	385
Ankrd17	81702	568936351	XP_006535350.1	ankyrin repeat domain-containing protein 17	131	303.9	7.47	-6.64386	0	1		1947	0	1	1	1947
Anln	68743	568960015	XP_006510644.1	actin-binding protein anillin	85	124.9	6.8	-6.64386	0	1		685	0	1	1	685
Arid1b	239985	145553997	NP_001078824.1	AT-rich interactive domain-containing protein 1B	81	237.6	6.73	-6.64386	0	1		1574	0	1	1	1574
Arid2	77044	262231796	NP_780460.3	AT-rich interactive domain-containing protein 2	78	195.9	7.47	-6.64386	0	2		706; 1527	0	7	2	706; 1527
Asun	71177	133922586	NP_620096.2	protein asunder homolog	46	82.7	6.92	-6.64386	0	1		496	0	1	1	496
Atrx	22589	755565325	XP_011245864.1	transcriptional regulator ATRX	275	278.8	6.73	-6.64386	0	4		10; 460; 560; 576	0	5	4	10; 460; 560; 576
Bclaf1	72567	70906447	NP_001020563.1	bcl-2-associated transcription factor 1	92	105.9	9.99	-6.64386	0	4		333; 419; 460; 548	0	5	4	333; 419; 460; 548
Bclaf1	72567	70906449	NP_001020564.1	bcl-2-associated transcription factor 1	87	100.2	9.96	-6.64386	0	4		333; 419; 460; 548	0	5	4	333; 419; 460; 548
Bptf	207165	755537881	XP_011247144.1	nucleosome-remodeling factor subunit BPTF	239	346.3	6.81	-6.64386	0	1		2100	0	1	1	2100
Brd4	57261	569001137	XP_006524749.1	bromodomain-containing protein 4	115	156	9.2	-6.64386	0	1		1054	0	2	1	1054
Casc5	76464	125628638	NP_083893.2	protein CASC5	188	238	5.72	-6.64386	0	2		405; 767	0	2	2	405; 767
Ccdc102a	234582	755526634	XP_011246656.1	coiled-coil domain-containing protein 102A	36	62.6	5.69	-6.64386	0	1		267	0	1	1	267
Ccdc174	232236	147899958	NP_766318.2	coiled-coil domain-containing protein 174	54	53.9	6.05	-6.64386	0	1		369	0	1	1	369
Cdkn2aip	70925	27369527	NP_765995.1	CDKN2A-interacting protein	47	59.7	9.16	-6.64386	0	1		367	0	1	1	367
Cebpb	12608	567757569	NP_001274667.1	CCAAT/enhancer-binding protein beta	21	29.1	8.47	-6.64386	0	1		18	0	1	1	18
Cherp	27967	119672912	NP_613051.3	calcium homeostasis endoplasmic reticulum protein	40	106.3	9.19	-6.64386	0	2		890; 921	0	2	2	890; 921
Cux1	13047	601984298	NP_001278162.1	protein CASP	104	175.3	6.06	-6.64386	0	1		917	0	1	1	917
Ddx42	72047	568975951	XP_006534344.1	ATP-dependent RNA helicase DDX42	63	101.9	6.98	-6.64386	0	1		61	0	1	1	61
Dhx9	13211	755493774	XP_011246220.1	ATP-dependent RNA helicase A	65	149.6	6.83	-6.64386	0	1		149	0	1	1	149
Dlg1	13383	568994554	XP_006521824.1	disks large homolog 1	61	104.2	5.86	-6.64386	0	1		556	0	2	1	556
Dmap1	66233	12963557	NP_075667.1	DNA methyltransferase 1-associated protein 1	50	53.1	9.5	-6.64386	0	1		270	0	1	1	270
Dnmt1	13433	568958803	XP_006510051.1	DNA (cytosine-5)-methyltransferase 1	128	189.7	8.07	-6.64386	0	1		1516	0	1	1	1516
Dnttip2	99480	24418931	NP_722501.1	deoxynucleotidyltransferase terminal-interacting protein 2	78	84.2	6.44	-6.64386	0	3		317; 361; 366	0	4	3	317; 361; 366
Dot1l	208266	755534307	XP_011241692.1	histone-lysine N-methyltransferase, H3 lysine-79 specific	98	185.2	9.31	-6.64386	0	1		776	0	1	1	776
Ehmt1	77683	568914498	XP_006498485.1	histone-lysine N-methyltransferase EHMT1	78	143.5	5.99	-6.64386	0	1		331	0	3	1	331
Eif2s3x	26905	6753738	NP_036140.1	eukaryotic translation initiation factor 2 subunit 3, X-linked	36	51	8.4	-6.64386	0	1		27	0	2	1	27
Gatad2a	234366	568955385	XP_006509699.1	transcriptional repressor p66 alpha	40	67.7	9.89	-6.64386	0	2		550; 576	0	2	2	550; 576
Gatad2b	229542	21314854	NP_647465.1	transcriptional repressor p66-beta	36	65.4	9.7	-6.64386	0	1		44	0	2	1	44
Gpatch1	67471	13385692	NP_080457.1	G patch domain-containing protein 1	92	102.9	6.98	-6.64386	0	1		923	0	2	1	923
H2afy	26914	41152517	NP_036145.1	core histone macro-H2A.1	47	39.7	9.8	-6.64386	0	1		189	0	2	1	189
Hcfc1	15161	569009735	XP_006527898.1	host cell factor 1	72	214.9	6.89	-6.64386	0	3		665; 813; 836	0	7	3	665; 813; 836
Hist1h1b	56702	21426893	NP_064418.1	histone H1.5	65	22.6	10.92	-6.64386	0	1		52	0	1	1	52
Hmg20a	66867	568961903	XP_006511431.1	high mobility group protein 20A	29	43.3	8.91	-6.64386	0	1		176	0	1	1	176
Hmgxb4	70823	568957557	XP_006531425.1	HMG domain-containing protein 4	82	69.8	9.51	-6.64386	0	1		X	0	2	1	X
Hnrnpu	51810	160333923	NP_058085.2	heterogeneous nuclear ribonucleoprotein U	67	87.9	6.24	-6.64386	0	5		12; 176; 181; 210; X	0	11	5	12; 176; 181; 210; X
Hspa8	15481	31981690	NP_112442.2	heat shock cognate 71 kDa protein	54	70.8	5.52	-6.64386	0	1		507	0	2	1	507
Junb	16477	6680512	NP_032442.1	transcription factor jun-B	19	35.7	9.22	-6.64386	0	2		33; 340	0	3	2	33; 340
Kdm2a	225876	569005736	XP_006531785.1	lysine-specific demethylase 2A	74	132.6	7.52	-6.64386	0	1		818	0	1	1	818
Kdm6b	216850	755538168	XP_011247225.1	lysine-specific demethylase 6B	67	176.2	8.62	-6.64386	0	1		817	0	1	1	817
Larp1	73158	226442901	NP_082727.1	la-related protein 1	83	121.1	8.79	-6.64386	0	1		125	0	1	1	125
Lcor	212391	755563036	XP_011245516.1	ligand-dependent corepressor	129	200.7	6.18	-6.64386	0	1		303	0	2	1	303
Mafg	17134	6754610	NP_034886.1	transcription factor MafG	17	17.9	10.04	-6.64386	0	1		144	0	1	1	144
Map4	17758	568963499	XP_006512019.1	microtubule-associated protein 4	91	117.5	4.98	-6.64386	0	1		486	0	1	1	486
Matr3	17184	25141233	NP_034901.2	matrin-3	66	94.6	6.25	-6.64386	0	1		797	0	1	1	797
Mcph1	244329	755524470	XP_011240358.1	microcephalin	72	96.9	8.28	-6.64386	0	1		405	0	1	1	405
Med1	19014	121582398	NP_001073587.1	mediator of RNA polymerase II transcription subunit 1	124	167	8.73	-6.64386	0	2		1076; 1393	0	2	2	1076; 1393
Mfap1b	100034361	126517472	NP_001075444.1	microfibrillar-associated protein 1	44	51.9	4.98	-6.64386	0	1		376	0	1	1	376
Myo5a	17918	568960777	XP_006510890.1	unconventional myosin-Va	167	218.6	8.51	-6.64386	0	1		1301	0	1	1	1301
Nepro	212547	22122411	NP_666084.1	uncharacterized protein C3orf17 homolog	52	63.4	9.94	-6.64386	0	1		517	0	1	1	517
Nes	18008	50363232	NP_057910.3	nestin	74	207	4.34	-6.64386	0	4		380; 657; 855; X	0	16	4	380; 657; 855; X
Nfrkb	235134	568959267	XP_006510281.1	nuclear factor related to kappa-B-binding protein	81	140.1	9.14	-6.64386	0	1		1216	0	1	1	1216
Noc3l	57753	188497644	NP_067290.2	nucleolar complex protein 3 homolog	95	93.2	9.09	-6.64386	0	1		106	0	1	1	106
Nop58	55989	120407050	NP_061356.2	nucleolar protein 58	72	60.3	8.34	-6.64386	0	1		411	0	1	1	411
Nsd1	18193	568983119	XP_006517200.1	histone-lysine N-methyltransferase, H3 lysine-36 and H4 lysine-20 specific	225	296.2	8.13	-6.64386	0	1		864	0	2	1	864
Phc3	241915	568920912	XP_006535530.1	polyhomeotic-like protein 3	29	108.5	6.68	-6.64386	0	1		610	0	1	1	610
Pnisr	66625	226437597	NP_079945.1	arginine/serine-rich protein PNISR	72	93.1	10.08	-6.64386	0	1		730	0	1	1	730
Prkcdbp	109042	22324938	NP_082720.1	protein kinase C delta-binding protein	11	27.8	5.57	-6.64386	0	1		205	0	1	1	205
Prpf40a	56194	9055218	NP_061255.1	pre-mRNA-processing factor 40 homolog A	101	108.4	7.69	-6.64386	0	2		205; 233	0	3	2	205; 233
Prrc2c	226562	568910696	XP_006496829.1	protein PRRC2C	198	311.3	9.1	-6.64386	0	1		923	0	1	1	923
Ptbp1	19205	116517301	NP_001070831.1	polypyrimidine tract-binding protein 1	33	59.3	9.16	-6.64386	0	1		270	0	1	1	270
Ptbp2	56195	568923316	XP_006501794.1	polypyrimidine tract-binding protein 2	33	58	8.81	-6.64386	0	1		268	0	1	1	268
Ptbp3	230257	568926551	XP_006537914.1	polypyrimidine tract-binding protein 3	31	60	8.94	-6.64386	0	1		273	0	1	1	273
Ptrf	19285	6679567	NP_033012.1	polymerase I and transcript release factor	39	43.9	5.52	-6.64386	0	1		154	0	1	1	154
Rai14	75646	13507620	NP_109615.1	ankycorbin	101	108.8	6.27	-6.64386	0	1		505	0	1	1	505
Rbbp6	19647	163937858	NP_035377.2	E3 ubiquitin-protein ligase RBBP6	225	199.5	9.63	-6.64386	0	1		85	0	1	1	85
Rbm17	76938	22779924	NP_690037.1	splicing factor 45	36	45.3	5.82	-6.64386	0	3		24; 58; 276	0	6	3	24; 58; 276
Rbm25	67039	568980261	XP_006516228.1	RNA-binding protein 25	88	101.7	6.51	-6.64386	0	1		279	0	1	1	279
Rlf	109263	568928201	XP_006502719.1	zinc finger protein Rlf	146	217.3	6.71	-6.64386	0	1		1474	0	2	1	1474
Safb	224903	569000056	XP_006524223.1	scaffold attachment factor B1	59	105.3	5.38	-6.64386	0	4		458; 497; 592; 600	0	6	4	458; 497; 592; 600
Scaf11	72193	568993404	XP_006521493.1	protein SCAF11	93	163.7	6.77	-6.64386	0	2		1133; 1374	0	2	2	1133; 1374
Sept9	53860	568974836	XP_006533807.1	septin-9	40	63.7	8.32	-6.64386	0	1		10	0	1	1	10
Setd2	235626	568963777	XP_006512150.1	histone-lysine N-methyltransferase SETD2	197	287.2	6.37	-6.64386	0	1		785	0	2	1	785
Sf3b1	81898	153791358	NP_112456.2	splicing factor 3B subunit 1	84	145.7	7.09	-6.64386	0	3		6; 141; 182	0	5	3	6; 141; 182
Sgol2a	68549	51092285	NP_950172.1	shugoshin-like 2	130	130.2	8.76	-6.64386	0	1		508	0	1	1	508
Sin3a	20466	755529837	XP_011240987.1	paired amphipathic helix protein Sin3a	87	145.4	7.25	-6.64386	0	1		X	0	2	1	X
Smarce1	57376	10181166	NP_065643.1	SWI/SNF-related matrix-associated actin-dependent regulator of chromatin subfamily E member 1	30	46.6	4.88	-6.64386	0	1		92	0	4	1	92
Snrpc	20630	6755596	NP_035562.1	U1 small nuclear ribonucleoprotein C	8	17.4	9.67	-6.64386	0	1		52	0	1	1	52
Snrpd2	107686	58037145	NP_081219.1	small nuclear ribonucleoprotein Sm D2	17	13.5	9.91	-6.64386	0	1		118	0	1	1	118
Son	20658	568997402	XP_006523032.1	protein SON	118	268.7	5.71	-6.64386	0	1		284	0	1	1	284
Spen	56381	568931674	XP_006539132.1	msx2-interacting protein	237	398.4	8.54	-6.64386	0	1		2613	0	1	1	2613
Srrm2	75956	569001947	XP_006525139.1	serine/arginine repetitive matrix protein 2	137	294.7	12.03	-6.64386	0	3		1116; 1130; 1172	0	4	3	1116; 1130; 1172
Stat2	20847	568967116	XP_006513496.1	signal transducer and activator of transcription 2	46	105.7	5.27	-6.64386	0	1		289	0	1	1	289
Suz12	52615	40353214	NP_954666.1	polycomb protein Suz12	61	83	8.81	-6.64386	0	1		370	0	1	1	370
Tcf20	21411	166706891	NP_001107612.1	transcription factor 20	119	215.6	8.98	-6.64386	0	1		861	0	2	1	861
Tcf7l2	21416	569006774	XP_006526922.1	transcription factor 7-like 2	41	71.5	8.21	-6.64386	0	1		132	0	1	1	132
Tcof1	21453	312176443	NP_001185913.1	treacle protein	157	138.5	9.26	-6.64386	0	5		144; 241; 301; 318; 442	0	11	5	144; 241; 301; 318; 442
Tead4	21679	148352315	NP_035697.3	transcriptional enhancer factor TEF-3	27	48	8.06	-6.64386	0	1		140	0	1	1	140
Ubn1	170644	71534247	NP_080942.1	ubinuclein-1	120	122.3	9.31	-6.64386	0	1		805	0	2	1	805
Urb1	207932	256818750	NP_083773.1	nucleolar pre-ribosomal-associated protein 1	134	254.7	6.96	-6.64386	0	1		1582	0	2	1	1582
Usp7	252870	568995352	XP_006522201.1	ubiquitin carboxyl-terminal hydrolase 7	78	132.8	5.66	-6.64386	0	1		1137	0	2	1	1137
Utp15	105372	30725776	NP_849249.1	U3 small nucleolar RNA-associated protein 15 homolog	40	59.3	8.79	-6.64386	0	1		384	0	1	1	384
Vezf1	22344	569017593	XP_006536517.1	vascular endothelial zinc finger 1	36	57.2	9.57	-6.64386	0	1		100	0	1	1	100
Wdhd1	218973	568987294	XP_006518893.1	WD repeat and HMG-box DNA-binding protein 1	74	124.3	5.6	-6.64386	0	1		906	0	1	1	906
Wdr33	74320	569004614	XP_006526361.1	pre-mRNA 3' end processing protein WDR33	57	145.2	7.21	-6.64386	0	1		560	0	2	1	560
Wdr36	225348	158517940	NP_001103485.1	WD repeat-containing protein 36	48	99.7	7.11	-6.64386	0	1		762	0	1	1	762
Wdr43	72515	755559096	XP_011244946.1	WD repeat-containing protein 43	53	75.3	5.38	-6.64386	0	1		X	0	2	1	X
Wdr75	73674	83523742	NP_082875.1	WD repeat-containing protein 75	59	94	6.18	-6.64386	0	1		700	0	1	1	700
Wiz	22404	568999838	XP_006524118.1	protein Wiz	66	122.5	9	-6.64386	0	4		604; 669; 864; 940	0	8	4	604; 669; 864; 940
Xab2	67439	13385660	NP_080432.1	pre-mRNA-splicing factor SYF1	43	99.9	6.23	-6.64386	0	1		794	0	3	1	794
Xrcc1	22594	568945263	XP_006539800.1	DNA repair protein XRCC1	41	68.9	6.33	-6.64386	0	1		166	0	1	1	166
Zc3h4	330474	568946013	XP_006540165.1	zinc finger CCCH domain-containing protein 4	74	140.9	6.27	-6.64386	0	1		1056	0	1	1	1056
Zfhx3	11906	568955957	XP_006530648.1	zinc finger homeobox protein 3	226	405.9	6.24	-6.64386	0	1		367	0	1	1	367
Zfml	18139	568941002	XP_006505767.1	zinc finger protein 638	191	227.9	6.99	-6.64386	0	1		497	0	2	1	497
Zfp148	22661	755553520	XP_011244190.1	zinc finger protein 148	62	89.4	6.54	-6.64386	0	1		13	0	1	1	13
Zfp281	226442	237681154	NP_001153723.1	zinc finger protein 281	58	96.6	8.56	-6.64386	0	2		461; 596	0	3	2	461; 596
Zfp318	57908	157823950	NP_997554.2	zinc finger protein 318	155	246.2	7.01	-6.64386	0	1		626	0	1	1	626
Zfp516	329003	569005379	XP_006526562.1	zinc finger protein 516	72	124.7	8.51	-6.64386	0	3		138; 1051; 1056	0	6	3	138; 1051; 1056
Zfp609	214812	209447068	NP_766124.2	zinc finger protein 609	129	151	8	-6.64386	0	1		567	0	1	1	567
Zfp687	78266	27229259	NP_084350.1	zinc finger protein 687	67	130.3	8.12	-6.64386	0	3		397; 439; 1216	0	5	3	397; 439; 1216
Zfr	22763	568990435	XP_006520120.1	zinc finger RNA-binding protein	75	117.7	9.01	-6.64386	0	1		509	0	3	1	509
Zmym4	67785	167555112	NP_001107871.1	zinc finger MYM-type protein 4	117	172.3	6.8	-6.64386	0	1		152	0	1	1	152
Zmynd8	228880	568916742	XP_006499441.1	protein kinase C-binding protein 1	117	140.4	7.36	-6.64386	0	4		443; 448; 877; 1224	0	5	4	443; 448; 877; 1224

## Sheet: Peptide level view
Gene symbol	Gene ID	Database ID	RefSeq Accession	Protein Description	# Lysines	# Protein Groups	Annotated Sequence	Peptide Sequence	Peptide Modifications	m/z [Da]	Charge	Protein Positions	# Missed Cleavages	Peptide Window	Master Protein Accessions	m6A-tracer-BioID alone_REP1.raw - #Biotin sites	m6A-tracer-BioID alone_REP2.raw - #Biotin sites	LAP2 BioID_REP1.raw - #Biotin sites	LAP2 BioID_REP2.raw - #Biotin sites	m6A-tracer-BioID alone_REP1.raw - #PSMs	m6A-tracer-BioID alone_REP2.raw - #PSMs	LAP2 BioID_REP1.raw - #PSMs	LAP2 BioID_REP2.raw - #PSMs	m6A-tracer-BioID alone_REP1.raw - Abundance	m6A-tracer-BioID alone_REP2.raw - Abundance	LAP2 BioID_REP1.raw - Abundance	LAP2 BioID_REP2.raw - Abundance	LAP2 BioID - Biotin sites	LAP2 BioID - Total #PSMs	LAP2 BioID - #Biotin sites	m6A-tracer-BioID alone - Biotin sites
Tmem199	195040	72384367	NP_954669.2	transmembrane protein 199 [Mus musculus]	9	1	[K].IKIQLANEEYKR.[I]	IkIQLANEEYKR	[K2](Biotin)	577.647	3	107	2	VARLEKIkIQLANEE	72384367	0	0	1	1	0	0	1	1	0	0	1.17226e+06	891697	107	2	1
Tor1aip1	208263	229608946	NP_001153490.1	torsin-1A-interacting protein 1 isoform 1 [Mus musculus]	27	1	[R].TPPEKFRPASAGEEVR.[E]	TPPEkFRPASAGEEVR	[K5](Biotin)	666.335	3	89	1	GRRTPPEkFRPASAG	229608946	0	0	0	1	0	0	0	1	0	0	0	215098	89; 123	2	2
Tor1aip1	208263	229608946	NP_001153490.1	torsin-1A-interacting protein 1 isoform 1 [Mus musculus]	27	1	[R].RAQEAEEMKTRR.[S]	RAQEAEEMkTRR	[K9](Biotin)	577.619	3	123	3	AQEAEEMkTRRSARL	229608946	0	0	1	0	0	0	1	0	0	0	107711	0	89; 123	2	2
Efhd2	27984	31981086	NP_080270.2	EF-hand domain-containing protein D2 [Mus musculus]	22	1	[K].NFFEAKVQAINVSSR.[F]	NFFEAkVQAINVSSR	[K6](Biotin)	645.996	3	197	1	AKNFFEAkVQAINVS	31981086	0	0	1	0	0	0	1	0	0	0	36966.2	0	197	1	1
Vapa	30960	569000519	XP_006524448.1	vesicle-associated membrane protein-associated protein A isoform X1 [Mus musculus]	26	1	[K].AVPLNASKQDGPLPKPHSVSLNDTETR.[K]	AVPLNASkQDGPLPKPHSVSLNDTETR	[K8](Biotin)	775.15	4	192	1	AVPLNASkQDGPLPK	569000519	0	0	1	1	0	0	1	1	0	0	1.30419e+06	1.12936e+06	192	2	1
Vapb	56491	31543940	NP_062780.2	vesicle-associated membrane protein-associated protein B [Mus musculus]	21	1	[R].CVFELPAENAKPHDVEINKIIPTSASK.[T]	CVFELPAENAKPHDVEINKIIPTSASK	[K](Biotin)			X	1
Ube2j1	56228	31980960	NP_062532.2	ubiquitin-conjugating enzyme E2 J1 [Mus musculus]	16	1	[R].YNLKSPAVK.[R]	YNLkSPAVK	[K4](Biotin)	623.337	2	8	1	METRYNLkSPAVKRL	31980960	0	0	1	1	0	0	1	1	0	0	610994	470547	8	4	1
Ube2j1	56228	31980960	NP_062532.2	ubiquitin-conjugating enzyme E2 J1 [Mus musculus]	16	1	[R].YNLKSPAVKR.[L]	YNLkSPAVKR	[K4](Biotin)	467.927	3	8	2	METRYNLkSPAVKRL	31980960	0	0	1	1	0	0	1	1	0	0	1.24673e+06	838781	8	4	1
Gpkow	209416	125991228	NP_776108.2	G patch domain and KOW motifs-containing protein [Mus musculus]	30	1	[R].KLQSVNPPEAPK.[E]	kLQSVNPPEAPK	[K1](Biotin)	767.41	2	54	1	LATVEGRkLQSVNPP	125991228	1	0	0	0	1	0	0	0	0	0	0	0				54
Ano6	105722	359465539	NP_001240742.1	anoctamin-6 isoform 1 [Mus musculus]	56	1	[R].SPFGNLNWFTKVLR.[V]	SPFGNLNWFTkVLR	[K11](Biotin)	635.666	3	188	1	GNLNWFTkVLRVNES	359465539	0	0	1	0	0	0	1	0	0	0	31029.3	0	188	1	1
Ptpn2	19255	187608416	NP_001120649.1	tyrosine-protein phosphatase non-receptor type 2 isoform b [Mus musculus]	29	1	[R].VMVEKYNGKR.[I]	VMVEkYNGKR	[K5](Biotin)	483.916	3	312	2	QNRVMVEkYNGKRIG	187608416	0	0	0	1	0	0	0	1	0	0	0	52351.8	312	1	1
Slc39a7	14977	118150668	NP_001071177.1	zinc transporter SLC39A7 precursor [Mus musculus]	12	1	[K].EKPSTEEEKEVGGLR.[K]	EKPSTEEEkEVGGLR	[K9](Biotin)	638.647	3	288	1	KPSTEEEkEVGGLRK	118150668	0	0	1	1	0	0	1	1	0	0	150636	152171	288	2	1
Senp2	75826	568996500	XP_006522751.1	sentrin-specific protease 2 isoform X1 [Mus musculus]	50	1	[K].LGNKSPNGISDYPKIR.[V]	LGNKSPNGISDYPkIR	[K14](Biotin)	662.349	3	133	2	NGISDYPkIRVTVTR	568996500	0	0	1	0	0	0	1	0	0	0	608672	0	133	1	1
Pom121	107939	156231054	NP_683734.2	nuclear envelope pore membrane protein POM 121 [Mus musculus]	45	1	[R].GISQLWKR.[S]	GISQLWkR	[K7](Biotin)	607.33	2	402	1	RGISQLWkRSGPTSS	156231054	0	0	1	1	0	0	1	1	0	0	381829	250156	135; 402	3	2
Pom121	107939	156231054	NP_683734.2	nuclear envelope pore membrane protein POM 121 [Mus musculus]	45	1	[R].SPLGGPDPAELLLMGSYLGKPGPPEPALRQDPR.[E]	SPLGGPDPAELLLMGSYLGkPGPPEPALRQDPR	[K20](Biotin)	913.724	4	135	1	LMGSYLGkPGPPEPA	156231054	0	0	1	0	0	0	1	0	0	0	76074	0	135; 402	3	2
Tmpo	21917	121949769	NP_001073601.1	lamina-associated polypeptide 2 isoform beta [Mus musculus]	31	3	[K].LLKLREQGTESR.[S]	LLkLREQGTESR	[K3](Biotin)	552.635	3	147	2	LYEKKLLkLREQGTE	121949769	0	0	1	1	0	0	1	2	0	0	395690	604031	15; 17; 34; 97; 100; 106; 147; 194; 197; 202; 206; 212; 224; 236; 258; 279; 283	201	17	34; 212; 279; 283
Tmpo	21917	121949769	NP_001073601.1	lamina-associated polypeptide 2 isoform beta [Mus musculus]	31	2	[K].LEKREPLKGR.[A]	LEKREPLKGR	[K](Biotin)			X	3
Tmpo	21917	121949769	NP_001073601.1	lamina-associated polypeptide 2 isoform beta [Mus musculus]	31	2	[K].IELKLEK.[R]	IELkLEK	[K4](Biotin)	549.814	2	194	1	EDSKIELkLEKREPL	121949769	0	0	0	1	0	0	0	1	0	0	0	433922	15; 17; 34; 97; 100; 106; 147; 194; 197; 202; 206; 212; 224; 236; 258; 279; 283	201	17	34; 212; 279; 283
Tmpo	21917	121949769	NP_001073601.1	lamina-associated polypeptide 2 isoform beta [Mus musculus]	31	2	[K].IELKLEKR.[E]	IELkLEKR	[K4](Biotin)	627.865	2	194	2	EDSKIELkLEKREPL	121949769	0	0	1	1	0	0	2	2	0	0	4024205	3.26373e+06	15; 17; 34; 97; 100; 106; 147; 194; 197; 202; 206; 212; 224; 236; 258; 279; 283	201	17	34; 212; 279; 283
Tmpo	21917	121949769	NP_001073601.1	lamina-associated polypeptide 2 isoform beta [Mus musculus]	31	2	[K].IELKLEKREPLK.[G]	IELkLEKREPLK	[K4](Biotin)	431.255	4	194	3	EDSKIELkLEKREPL	121949769	0	0	1	0	0	0	1	0	0	0	488246	0	15; 17; 34; 97; 100; 106; 147; 194; 197; 202; 206; 212; 224; 236; 258; 279; 283	201	17	34; 212; 279; 283
Tmpo	21917	121949769	NP_001073601.1	lamina-associated polypeptide 2 isoform beta [Mus musculus]	31	3	[K].LKSELVANNVTLPAGEQR.[K]	LkSELVANNVTLPAGEQR	[K2](Biotin)	722.385	3	17	1	VLTKDKLkSELVANN	121949769	0	0	1	1	0	0	1	1	0	0	4765741	2.82471e+06	15; 17; 34; 97; 100; 106; 147; 194; 197; 202; 206; 212; 224; 236; 258; 279; 283	201	17	34; 212; 279; 283
Tmpo	21917	121949769	NP_001073601.1	lamina-associated polypeptide 2 isoform beta [Mus musculus]	31	3	[K].LKSELVANNVTLPAGEQRK.[D]	LkSELVANNVTLPAGEQRK	[K2](Biotin)	1147.12	2	17	2	VLTKDKLkSELVANN	121949769	0	0	1	1	0	0	3	2	0	0	1.84496e+07	1.43806e+07	15; 17; 34; 97; 100; 106; 147; 194; 197; 202; 206; 212; 224; 236; 258; 279; 283	201	17	34; 212; 279; 283
Tmpo	21917	121949769	NP_001073601.1	lamina-associated polypeptide 2 isoform beta [Mus musculus]	31	2	[K].YVPKYAPLADVKSEK.[T]	YVPkYAPLADVKSEK	[K4](Biotin)	645.342	3	283	2	FSSKYVPkYAPLADV	121949769	0	0	1	1	0	0	1	2	0	0	13498074	24303020	15; 17; 34; 97; 100; 106; 147; 194; 197; 202; 206; 212; 224; 236; 258; 279; 283	201	17	34; 212; 279; 283
Tmpo	21917	121949769	NP_001073601.1	lamina-associated polypeptide 2 isoform beta [Mus musculus]	31	2	[R].MEESFSSKYVPK.[Y]	MEESFSSkYVPK	[K8](Biotin)	829.387	2	279	1	MEESFSSkYVPKYAP	121949769	1	0	1	1	1	0	9	11	1.04191e+06	0	467418230	4.30684e+08	15; 17; 34; 97; 100; 106; 147; 194; 197; 202; 206; 212; 224; 236; 258; 279; 283	201	17	34; 212; 279; 283
Tmpo	21917	121949769	NP_001073601.1	lamina-associated polypeptide 2 isoform beta [Mus musculus]	31	2	[R].MEESFSSKYVPK.[Y]	MEESFSSkYVPK	[K8](Biotin)	829.387	2	279	1	MEESFSSkYVPKYAP	121949769	1	0	1	1	1	0	9	11	1.04191e+06	0	467418230	4.30684e+08	15; 17; 34; 97; 100; 106; 147; 194; 197; 202; 206; 212; 224; 236; 258; 279; 283	201	17	34; 212; 279; 283
Tmpo	21917	121949769	NP_001073601.1	lamina-associated polypeptide 2 isoform beta [Mus musculus]	31	2	[R].MEESFSSKYVPKYAPLADVK.[S]	MEESFSSkYVPkYAPLADVK	[K8; K12](Biotin)	919.771	3	279; 283	2	MEESFSSkYVPKYAP; FSSKYVPkYAPLADV	121949769	0	0	2	2	0	0	4	2	0	0	6.74203e+06	2.25238e+06	15; 17; 34; 97; 100; 106; 147; 194; 197; 202; 206; 212; 224; 236; 258; 279; 283	201	17	34; 212; 279; 283
Tmpo	21917	121949769	NP_001073601.1	lamina-associated polypeptide 2 isoform beta [Mus musculus]	31	2	[R].MEESFSSKYVPKYAPLADVKSEK.[T]	MEESFSSkYVPkYAPLADVKSEK	[K8; K12](Biotin)	772.125	4	279; 283	3	MEESFSSkYVPKYAP; FSSKYVPkYAPLADV	121949769	0	0	2	0	0	0	1	0	0	0	304803	0	15; 17; 34; 97; 100; 106; 147; 194; 197; 202; 206; 212; 224; 236; 258; 279; 283	201	17	34; 212; 279; 283
Tmpo	21917	121949769	NP_001073601.1	lamina-associated polypeptide 2 isoform beta [Mus musculus]	31	3	[K].KTDKPR.[L]	kTDkPR	[K1; K4](Biotin)	598.8	2	97; 100	1	VGRKATKkTDKPRLE; KATKKTDkPRLEDKD	121949769	0	0	0	2	0	0	0	1	0	0	0	73545.9	15; 17; 34; 97; 100; 106; 147; 194; 197; 202; 206; 212; 224; 236; 258; 279; 283	201	17	34; 212; 279; 283
Tmpo	21917	121949769	NP_001073601.1	lamina-associated polypeptide 2 isoform beta [Mus musculus]	31	3	[K].KTDKPR.[L]	KTDKPR	[K](Biotin)			X	1
Tmpo	21917	121949769	NP_001073601.1	lamina-associated polypeptide 2 isoform beta [Mus musculus]	31	2	[K].GAAGRPLELSDFRMEESFSSKYVPK.[Y]	GAAGRPLELSDFRMEESFSSkYVPK	[K21](Biotin)	761.624	4	279	2	MEESFSSkYVPKYAP	121949769	0	0	1	0	0	0	1	0	0	0	321348	0	15; 17; 34; 97; 100; 106; 147; 194; 197; 202; 206; 212; 224; 236; 258; 279; 283	201	17	34; 212; 279; 283
Tmpo	21917	121949769	NP_001073601.1	lamina-associated polypeptide 2 isoform beta [Mus musculus]	31	3	[K].KLLKLR.[CE]	KLLKLR	[K](Biotin)			X	2
Tmpo	21917	121949769	NP_001073601.1	lamina-associated polypeptide 2 isoform beta [Mus musculus]	31	3	[K].TDKPRLEDKDDLDVTELSNEELLDQLVR.[Y]	TDKPRLEDKDDLDVTELSNEELLDQLVR	[K](Biotin)			X	2
Tmpo	21917	121949769	NP_001073601.1	lamina-associated polypeptide 2 isoform beta [Mus musculus]	31	1	[R].TEHNQVGEKTEER.[R]	TEHNQVGEkTEER	[K9](Biotin)	594.941	3	224	1	EHNQVGEkTEERRVD	121949769	0	0	1	1	0	0	1	1	0	0	398519	378523	15; 17; 34; 97; 100; 106; 147; 194; 197; 202; 206; 212; 224; 236; 258; 279; 283	201	17	34; 212; 279; 283
Tmpo	21917	121949769	NP_001073601.1	lamina-associated polypeptide 2 isoform beta [Mus musculus]	31	2	[K].TPVTLKQR.[R]	TPVTLkQR	[K6](Biotin)	584.83	2	212	1	AKTPVTLkQRRTEHN	121949769	0	0	1	1	0	0	3	4	0	0	3.50985e+07	3.84766e+07	15; 17; 34; 97; 100; 106; 147; 194; 197; 202; 206; 212; 224; 236; 258; 279; 283	201	17	34; 212; 279; 283
Tmpo	21917	121949769	NP_001073601.1	lamina-associated polypeptide 2 isoform beta [Mus musculus]	31	2	[R].VDRDILKEMFPYEASTPTGISASCR.[R]	VDRDILkEMFPYEASTPTGISASCR	[K7](Biotin)	768.118	4	236	2	RVDRDILkEMFPYEA	121949769	0	0	1	1	0	0	4	4	0	0	5.47524e+06	3.61184e+06	15; 17; 34; 97; 100; 106; 147; 194; 197; 202; 206; 212; 224; 236; 258; 279; 283	201	17	34; 212; 279; 283
Tmpo	21917	121949769	NP_001073601.1	lamina-associated polypeptide 2 isoform beta [Mus musculus]	31	2	[R].DILKEMFPYEASTPTGISASCR.[R]	DILkEMFPYEASTPTGISASCR	[K4](Biotin)	905.755	3	236	1	RVDRDILkEMFPYEA	121949769	0	0	1	1	0	0	6	4	0	0	2.68208e+07	3.50007e+07	15; 17; 34; 97; 100; 106; 147; 194; 197; 202; 206; 212; 224; 236; 258; 279; 283	201	17	34; 212; 279; 283
Tmpo	21917	121949769	NP_001073601.1	lamina-associated polypeptide 2 isoform beta [Mus musculus]	31	2	[R].QNGSNDSDRYSDNDEDSKIELKLEK.[R]	QNGSNDSDRYSDNDEDSKIELkLEK	[K22](Biotin)	782.105	4	194	3	EDSKIELkLEKREPL	121949769	0	0	1	0	0	0	1	0	0	0	2161974	0	15; 17; 34; 97; 100; 106; 147; 194; 197; 202; 206; 212; 224; 236; 258; 279; 283	201	17	34; 212; 279; 283
Tmpo	21917	121949769	NP_001073601.1	lamina-associated polypeptide 2 isoform beta [Mus musculus]	31	2	[K].REPLKGR.[A]	REPLkGR	[K5](Biotin)	541.301	2	202	2	LEKREPLkGRAKTPV	121949769	0	0	1	1	0	0	2	2	0	0	13495970	1.12707e+07	15; 17; 34; 97; 100; 106; 147; 194; 197; 202; 206; 212; 224; 236; 258; 279; 283	201	17	34; 212; 279; 283
Tmpo	21917	121949769	NP_001073601.1	lamina-associated polypeptide 2 isoform beta [Mus musculus]	31	2	[R].RPIKGAAGRPLELSDFR.[M]	RPIkGAAGRPLELSDFR	[K4](Biotin)	528.041	4	258	1	ASCRRPIkGAAGRPL	121949769	0	0	1	1	0	0	3	4	0	0	97716168	67947060	15; 17; 34; 97; 100; 106; 147; 194; 197; 202; 206; 212; 224; 236; 258; 279; 283	201	17	34; 212; 279; 283
Tmpo	21917	121949769	NP_001073601.1	lamina-associated polypeptide 2 isoform beta [Mus musculus]	31	2	[R].RPIKGAAGRPLELSDFRMEESFSSK.[Y]	RPIkGAAGRPLELSDFRMEESFSSK	[K4](Biotin)	607.711	5	258	2	ASCRRPIkGAAGRPL	121949769	0	0	1	0	0	0	1	0	0	0	356482	0	15; 17; 34; 97; 100; 106; 147; 194; 197; 202; 206; 212; 224; 236; 258; 279; 283	201	17	34; 212; 279; 283
Tmpo	21917	121949769	NP_001073601.1	lamina-associated polypeptide 2 isoform beta [Mus musculus]	31	2	[R].RVDRDILKEMFPYEASTPTGISASCR.[R]	RVDRDILkEMFPYEASTPTGISASCR	[K8](Biotin)	811.142	4	236	3	RVDRDILkEMFPYEA	121949769	0	0	1	1	0	0	7	7	0	0	1.23235e+08	1.61163e+08	15; 17; 34; 97; 100; 106; 147; 194; 197; 202; 206; 212; 224; 236; 258; 279; 283	201	17	34; 212; 279; 283
Tmpo	21917	121949769	NP_001073601.1	lamina-associated polypeptide 2 isoform beta [Mus musculus]	31	2	[R].RVDRDILKEMFPYEASTPTGISASCR.[R]	RVDRDILkEMFPYEASTPTGISASCR	[K8](Biotin)	811.142	4	236	3	RVDRDILkEMFPYEA	121949769	0	0	1	1	0	0	7	7	0	0	1.23235e+08	1.61163e+08	15; 17; 34; 97; 100; 106; 147; 194; 197; 202; 206; 212; 224; 236; 258; 279; 283	201	17	34; 212; 279; 283
Tmpo	21917	121949769	NP_001073601.1	lamina-associated polypeptide 2 isoform beta [Mus musculus]	31	2	[R].DILKEMFPYEASTPTGISASCR.[R]	DILkEMFPYEASTPTGISASCR	[K4](Biotin)	905.755	3	236	1	RVDRDILkEMFPYEA	121949769	0	0	1	1	0	0	6	4	0	0	2.68208e+07	3.50007e+07	15; 17; 34; 97; 100; 106; 147; 194; 197; 202; 206; 212; 224; 236; 258; 279; 283	201	17	34; 212; 279; 283
Tmpo	21917	121949769	NP_001073601.1	lamina-associated polypeptide 2 isoform beta [Mus musculus]	31	2	[K].YVPKYAPLADVKSEKTK.[K]	YVPkYAPLADVKSEKTK	[K4](Biotin)	721.722	3	283	3	FSSKYVPkYAPLADV	121949769	0	0	1	1	0	0	1	1	0	0	916199	150123	15; 17; 34; 97; 100; 106; 147; 194; 197; 202; 206; 212; 224; 236; 258; 279; 283	201	17	34; 212; 279; 283
Tmpo	21917	121949769	NP_001073601.1	lamina-associated polypeptide 2 isoform beta [Mus musculus]	31	3	[K].DKLKSELVANNVTLPAGEQR.[K]	DKLKSELVANNVTLPAGEQR	[K](Biotin)			X	2
Tmpo	21917	121949769	NP_001073601.1	lamina-associated polypeptide 2 isoform beta [Mus musculus]	31	3	[K].DKLKSELVANNVTLPAGEQRK.[D]	DkLkSELVANNVTLPAGEQRK	[K2; K4](Biotin)	921.482	3	15; 17	3	PSVLTKDkLKSELVA; VLTKDKLkSELVANN	121949769	0	0	2	0	0	0	1	0	0	0	970181	0	15; 17; 34; 97; 100; 106; 147; 194; 197; 202; 206; 212; 224; 236; 258; 279; 283	201	17	34; 212; 279; 283
Tmpo	21917	121949769	NP_001073601.1	lamina-associated polypeptide 2 isoform beta [Mus musculus]	31	2	[R].AKTPVTLKQR.[R]	AkTPVTLkQR	[K2; K8](Biotin)	797.434	2	206; 212	2	EPLKGRAkTPVTLKQ; AKTPVTLkQRRTEHN	121949769	0	0	2	0	0	0	1	0	0	0	1.06577e+06	0	15; 17; 34; 97; 100; 106; 147; 194; 197; 202; 206; 212; 224; 236; 258; 279; 283	201	17	34; 212; 279; 283
Tmpo	21917	121949769	NP_001073601.1	lamina-associated polypeptide 2 isoform beta [Mus musculus]	31	2	[R].AKTPVTLK.[Q]	AkTPVTLK	[K2](Biotin)	542.315	2	206	1	EPLKGRAkTPVTLKQ	121949769	0	0	1	1	0	0	2	4	0	0	208200432	207826480	15; 17; 34; 97; 100; 106; 147; 194; 197; 202; 206; 212; 224; 236; 258; 279; 283	201	17	34; 212; 279; 283
Tmpo	21917	121949769	NP_001073601.1	lamina-associated polypeptide 2 isoform beta [Mus musculus]	31	3	[K].DKLKSELVANNVTLPAGEQR.[K]	DkLkSELVANNVTLPAGEQR	[K2; K4](Biotin)	878.787	3	15; 17	2	PSVLTKDkLKSELVA; VLTKDKLkSELVANN	121949769	0	0	2	2	0	0	1	2	0	0	1.30107e+06	1.14822e+06	15; 17; 34; 97; 100; 106; 147; 194; 197; 202; 206; 212; 224; 236; 258; 279; 283	201	17	34; 212; 279; 283
Tmpo	21917	121949769	NP_001073601.1	lamina-associated polypeptide 2 isoform beta [Mus musculus]	31	3	[K].DKLKSELVANNVTLPAGEQRK.[D]	DKLKSELVANNVTLPAGEQRK	[K](Biotin)			X	3
Tmpo	21917	121949769	NP_001073601.1	lamina-associated polypeptide 2 isoform beta [Mus musculus]	31	2	[R].AKTPVTLKQRR.[T]	AKTPVTLkQRR	[K8](Biotin)	381.726	4	212	3	AKTPVTLkQRRTEHN	121949769	0	0	1	1	0	0	2	2	0	0	7.68886e+06	6.67029e+06	15; 17; 34; 97; 100; 106; 147; 194; 197; 202; 206; 212; 224; 236; 258; 279; 283	201	17	34; 212; 279; 283
Tmpo	21917	121949769	NP_001073601.1	lamina-associated polypeptide 2 isoform beta [Mus musculus]	31	2	[R].AKTPVTLKQR.[R]	AKTPVTLkQR	[K8](Biotin)	456.601	3	212	2	AKTPVTLkQRRTEHN	121949769	0	1	1	1	0	1	3	4	0	89348.4	305956726	188934824	15; 17; 34; 97; 100; 106; 147; 194; 197; 202; 206; 212; 224; 236; 258; 279; 283	201	17	34; 212; 279; 283
Tmpo	21917	121949769	NP_001073601.1	lamina-associated polypeptide 2 isoform beta [Mus musculus]	31	1	[R].RTEHNQVGEKTEER.[R]	RTEHNQVGEkTEER	[K10](Biotin)	646.975	3	224	2	EHNQVGEkTEERRVD	121949769	0	0	1	1	0	0	2	2	0	0	1.04117e+06	1.5061e+06	15; 17; 34; 97; 100; 106; 147; 194; 197; 202; 206; 212; 224; 236; 258; 279; 283	201	17	34; 212; 279; 283
Tmpo	21917	121949769	NP_001073601.1	lamina-associated polypeptide 2 isoform beta [Mus musculus]	31	2	[K].LEKREPLK.[G]	LEkREPLK	[K3](Biotin)	619.85	2	197	2	KIELKLEkREPLKGR	121949769	0	0	1	1	0	0	2	1	0	0	3.18989e+06	273193	15; 17; 34; 97; 100; 106; 147; 194; 197; 202; 206; 212; 224; 236; 258; 279; 283	201	17	34; 212; 279; 283
Tmpo	21917	121949769	NP_001073601.1	lamina-associated polypeptide 2 isoform beta [Mus musculus]	31	3	[K].KTDKPRLEDKDDLDVTELSNEELLDQLVR.[Y]	KTDKPRLEDKDDLDVTELSNEELLDQLVR	[K](Biotin)			X	3
Tmpo	21917	121949769	NP_001073601.1	lamina-associated polypeptide 2 isoform beta [Mus musculus]	31	2	[K].YVPKYAPLADVK.[S]	YVPkYAPLADVK	[K4](Biotin)	795.425	2	283	1	FSSKYVPkYAPLADV	121949769	0	1	1	1	0	1	2	4	0	15499.8	59198532	3.52316e+07	15; 17; 34; 97; 100; 106; 147; 194; 197; 202; 206; 212; 224; 236; 258; 279; 283	201	17	34; 212; 279; 283
Tmpo	21917	121949769	NP_001073601.1	lamina-associated polypeptide 2 isoform beta [Mus musculus]	31	3	[R].LEDKDDLDVTELSNEELLDQLVR.[Y]	LEDkDDLDVTELSNEELLDQLVR	[K4](Biotin)	1464.21	2	106	1	DKPRLEDkDDLDVTE	121949769	0	0	1	0	0	0	2	0	0	0	2.00501e+06	0	15; 17; 34; 97; 100; 106; 147; 194; 197; 202; 206; 212; 224; 236; 258; 279; 283	201	17	34; 212; 279; 283
Tmpo	21917	121949769	NP_001073601.1	lamina-associated polypeptide 2 isoform beta [Mus musculus]	31	3	[R].KDVYVQLYLQHLTAR.[N]	kDVYVQLYLQHLTAR	[K1](Biotin)	691.704	3	34	1	LPAGEQRkDVYVQLY	121949769	0	1	1	1	0	2	4	6	0	158105	8.1752e+07	1.37083e+08	15; 17; 34; 97; 100; 106; 147; 194; 197; 202; 206; 212; 224; 236; 258; 279; 283	201	17	34; 212; 279; 283
Tmpo	21917	121949769	NP_001073601.1	lamina-associated polypeptide 2 isoform beta [Mus musculus]	31	2	[R].MEESFSSKYVPKYAPLADVK.[S]	MEESFSSkYVPkYAPLADVK	[K8; K12](Biotin)	919.771	3	279; 283	2	MEESFSSkYVPKYAP; FSSKYVPkYAPLADV	121949769	0	0	2	2	0	0	4	2	0	0	6.74203e+06	2.25238e+06	15; 17; 34; 97; 100; 106; 147; 194; 197; 202; 206; 212; 224; 236; 258; 279; 283	201	17	34; 212; 279; 283
Tmpo	21917	121949769	NP_001073601.1	lamina-associated polypeptide 2 isoform beta [Mus musculus]	31	4	[R].KLYEKK.[IL]	KLYEKK	[K](Biotin)			X	2
BirA_LAP2B	33333	33333	33333		55	3	[K].LLKLREQGTESR.[S]	LLkLREQGTESR	[K3](Biotin)	552.635	3	481	2	LYEKKLLkLREQGTE	33333	0	0	1	1	0	0	1	2	0	0	395690	604031	4; 194; 288; 294; 318; 349; 351; 368; 431; 434; 440; 481; 528; 531; 536; 540; 546; 593; 619; 636; 656; 657; 667; 679; 701; 722; 726	385	27	194; 288; 294; 368; 546; 619; 636; 667; 722; 726
BirA_LAP2B	33333	33333	33333		55	2	[K].LEKREPLKGR.[A]	LEKREPLKGR	[K](Biotin)			X	3
BirA_LAP2B	33333	33333	33333		55	2	[K].IELKLEK.[R]	IELkLEK	[K4](Biotin)	549.814	2	528	1	EDSKIELkLEKREPL	33333	0	0	0	1	0	0	0	1	0	0	0	433922	4; 194; 288; 294; 318; 349; 351; 368; 431; 434; 440; 481; 528; 531; 536; 540; 546; 593; 619; 636; 656; 657; 667; 679; 701; 722; 726	385	27	194; 288; 294; 368; 546; 619; 636; 667; 722; 726
BirA_LAP2B	33333	33333	33333		55	2	[K].IELKLEKR.[E]	IELkLEKR	[K4](Biotin)	627.865	2	528	2	EDSKIELkLEKREPL	33333	0	0	1	1	0	0	2	2	0	0	4024205	3.26373e+06	4; 194; 288; 294; 318; 349; 351; 368; 431; 434; 440; 481; 528; 531; 536; 540; 546; 593; 619; 636; 656; 657; 667; 679; 701; 722; 726	385	27	194; 288; 294; 368; 546; 619; 636; 667; 722; 726
BirA_LAP2B	33333	33333	33333		55	2	[K].IELKLEKREPLK.[G]	IELkLEKREPLK	[K4](Biotin)	431.255	4	528	3	EDSKIELkLEKREPL	33333	0	0	1	0	0	0	1	0	0	0	488246	0	4; 194; 288; 294; 318; 349; 351; 368; 431; 434; 440; 481; 528; 531; 536; 540; 546; 593; 619; 636; 656; 657; 667; 679; 701; 722; 726	385	27	194; 288; 294; 368; 546; 619; 636; 667; 722; 726
BirA_LAP2B	33333	33333	33333		55	3	[K].LKSELVANNVTLPAGEQR.[K]	LkSELVANNVTLPAGEQR	[K2](Biotin)	722.385	3	351	1	VLTKDKLkSELVANN	33333	0	0	1	1	0	0	1	1	0	0	4765741	2.82471e+06	4; 194; 288; 294; 318; 349; 351; 368; 431; 434; 440; 481; 528; 531; 536; 540; 546; 593; 619; 636; 656; 657; 667; 679; 701; 722; 726	385	27	194; 288; 294; 368; 546; 619; 636; 667; 722; 726
BirA_LAP2B	33333	33333	33333		55	3	[K].LKSELVANNVTLPAGEQRK.[D]	LkSELVANNVTLPAGEQRK	[K2](Biotin)	1147.12	2	351	2	VLTKDKLkSELVANN	33333	0	0	1	1	0	0	3	2	0	0	1.84496e+07	1.43806e+07	4; 194; 288; 294; 318; 349; 351; 368; 431; 434; 440; 481; 528; 531; 536; 540; 546; 593; 619; 636; 656; 657; 667; 679; 701; 722; 726	385	27	194; 288; 294; 368; 546; 619; 636; 667; 722; 726
BirA_LAP2B	33333	33333	33333		55	2	[K].YVPKYAPLADVKSEK.[T]	YVPkYAPLADVKSEK	[K4](Biotin)	645.342	3	726	2	FSSKYVPkYAPLADV	33333	0	0	1	1	0	0	1	2	0	0	13498074	24303020	4; 194; 288; 294; 318; 349; 351; 368; 431; 434; 440; 481; 528; 531; 536; 540; 546; 593; 619; 636; 656; 657; 667; 679; 701; 722; 726	385	27	194; 288; 294; 368; 546; 619; 636; 667; 722; 726
BirA_LAP2B	33333	33333	33333		55	2	[R].MEESFSSKYVPK.[Y]	MEESFSSkYVPK	[K8](Biotin)	829.387	2	722	1	MEESFSSkYVPKYAP	33333	1	0	1	1	1	0	9	11	1.04191e+06	0	467418230	4.30684e+08	4; 194; 288; 294; 318; 349; 351; 368; 431; 434; 440; 481; 528; 531; 536; 540; 546; 593; 619; 636; 656; 657; 667; 679; 701; 722; 726	385	27	194; 288; 294; 368; 546; 619; 636; 667; 722; 726
BirA_LAP2B	33333	33333	33333		55	2	[R].MEESFSSKYVPK.[Y]	MEESFSSkYVPK	[K8](Biotin)	829.387	2	722	1	MEESFSSkYVPKYAP	33333	1	0	1	1	1	0	9	11	1.04191e+06	0	467418230	4.30684e+08	4; 194; 288; 294; 318; 349; 351; 368; 431; 434; 440; 481; 528; 531; 536; 540; 546; 593; 619; 636; 656; 657; 667; 679; 701; 722; 726	385	27	194; 288; 294; 368; 546; 619; 636; 667; 722; 726
BirA_LAP2B	33333	33333	33333		55	2	[R].MEESFSSKYVPKYAPLADVK.[S]	MEESFSSkYVPkYAPLADVK	[K8; K12](Biotin)	919.771	3	722; 726	2	MEESFSSkYVPKYAP; FSSKYVPkYAPLADV	33333	0	0	2	2	0	0	4	2	0	0	6.74203e+06	2.25238e+06	4; 194; 288; 294; 318; 349; 351; 368; 431; 434; 440; 481; 528; 531; 536; 540; 546; 593; 619; 636; 656; 657; 667; 679; 701; 722; 726	385	27	194; 288; 294; 368; 546; 619; 636; 667; 722; 726
BirA_LAP2B	33333	33333	33333		55	2	[R].MEESFSSKYVPKYAPLADVKSEK.[T]	MEESFSSkYVPkYAPLADVKSEK	[K8; K12](Biotin)	772.125	4	722; 726	3	MEESFSSkYVPKYAP; FSSKYVPkYAPLADV	33333	0	0	2	0	0	0	1	0	0	0	304803	0	4; 194; 288; 294; 318; 349; 351; 368; 431; 434; 440; 481; 528; 531; 536; 540; 546; 593; 619; 636; 656; 657; 667; 679; 701; 722; 726	385	27	194; 288; 294; 368; 546; 619; 636; 667; 722; 726
BirA_LAP2B	33333	33333	33333		55	2	[-].MEQKLISEEDLDKDNTVPLK.[L]	MEQkLISEEDLDKDNTVPLK	[K4](Biotin)	871.767	3	4	2	MEQkLISEEDL	33333	0	0	1	1	0	0	4	4	0	0	8.49984e+06	9.8042e+06	4; 194; 288; 294; 318; 349; 351; 368; 431; 434; 440; 481; 528; 531; 536; 540; 546; 593; 619; 636; 656; 657; 667; 679; 701; 722; 726	385	27	194; 288; 294; 368; 546; 619; 636; 667; 722; 726
BirA_LAP2B	33333	33333	33333		55	3	[K].KTDKPR.[L]	kTDkPR	[K1; K4](Biotin)	598.8	2	431; 434	1	VGRKATKkTDKPRLE; KATKKTDkPRLEDKD	33333	0	0	0	2	0	0	0	1	0	0	0	73545.9	4; 194; 288; 294; 318; 349; 351; 368; 431; 434; 440; 481; 528; 531; 536; 540; 546; 593; 619; 636; 656; 657; 667; 679; 701; 722; 726	385	27	194; 288; 294; 368; 546; 619; 636; 667; 722; 726
BirA_LAP2B	33333	33333	33333		55	3	[K].KTDKPR.[L]	KTDKPR	[K](Biotin)			X	1
BirA_LAP2B	33333	33333	33333		55	2	[K].GAAGRPLELSDFRMEESFSSKYVPK.[Y]	GAAGRPLELSDFRMEESFSSkYVPK	[K21](Biotin)	761.624	4	722	2	MEESFSSkYVPKYAP	33333	0	0	1	0	0	0	1	0	0	0	321348	0	4; 194; 288; 294; 318; 349; 351; 368; 431; 434; 440; 481; 528; 531; 536; 540; 546; 593; 619; 636; 656; 657; 667; 679; 701; 722; 726	385	27	194; 288; 294; 368; 546; 619; 636; 667; 722; 726
BirA_LAP2B	33333	33333	33333		55	2	[R].GIDKQGALLLEQDGIIKPWMGGEISLR.[S]	GIDKQGALLLEQDGIIKPWMGGEISLR	[K](Biotin)			X	1
BirA_LAP2B	33333	33333	33333		55	3	[K].KLLKLR.[CE]	KLLKLR	[K](Biotin)			X	2
BirA_LAP2B	33333	33333	33333		55	1	[K].KPLTRAEVGEKTEER.[R]	KPLTRAEVGEKTEER	[K](Biotin)			X	2
BirA_LAP2B	33333	33333	33333		55	1	[R].KRVETSQHFR.[I]	kRVETSQHFR	[K1](Biotin)	757.39	2	593	2	GSRRTPRkRVETSQH	33333	0	0	1	1	0	0	2	3	0	0	1.069e+07	1.26037e+07	4; 194; 288; 294; 318; 349; 351; 368; 431; 434; 440; 481; 528; 531; 536; 540; 546; 593; 619; 636; 656; 657; 667; 679; 701; 722; 726	385	27	194; 288; 294; 368; 546; 619; 636; 667; 722; 726
BirA_LAP2B	33333	33333	33333		55	3	[K].TDKPRLEDKDDLDVTELSNEELLDQLVR.[Y]	TDKPRLEDKDDLDVTELSNEELLDQLVR	[K](Biotin)			X	2
BirA_LAP2B	33333	33333	33333		55	1	[R].TPKKPLTR.[A]	TPkKPLTR	[K3](Biotin)	583.84	2	656	1	DITRRTPkKPLTRAE	33333	0	0	1	1	0	0	3	2	0	0	3.81753e+07	19134584	4; 194; 288; 294; 318; 349; 351; 368; 431; 434; 440; 481; 528; 531; 536; 540; 546; 593; 619; 636; 656; 657; 667; 679; 701; 722; 726	385	27	194; 288; 294; 368; 546; 619; 636; 667; 722; 726
BirA_LAP2B	33333	33333	33333		55	2	[K].TPVTLKQR.[R]	TPVTLkQR	[K6](Biotin)	584.83	2	546	1	AKTPVTLkQRRTEHN	33333	0	0	1	1	0	0	3	4	0	0	3.50985e+07	3.84766e+07	4; 194; 288; 294; 318; 349; 351; 368; 431; 434; 440; 481; 528; 531; 536; 540; 546; 593; 619; 636; 656; 657; 667; 679; 701; 722; 726	385	27	194; 288; 294; 368; 546; 619; 636; 667; 722; 726
BirA_LAP2B	33333	33333	33333		55	2	[R].VDRDILKEMFPYEASTPTGISASCR.[R]	VDRDILkEMFPYEASTPTGISASCR	[K7](Biotin)	768.118	4	679	2	RVDRDILkEMFPYEA	33333	0	0	1	1	0	0	4	4	0	0	5.47524e+06	3.61184e+06	4; 194; 288; 294; 318; 349; 351; 368; 431; 434; 440; 481; 528; 531; 536; 540; 546; 593; 619; 636; 656; 657; 667; 679; 701; 722; 726	385	27	194; 288; 294; 368; 546; 619; 636; 667; 722; 726
BirA_LAP2B	33333	33333	33333		55	2	[R].WEKLDNFINRPVKLIIGDKEIFGISR.[G]	WEKLDNFINRPVKLIIGDKEIFGISR	[K](Biotin)			X	3
BirA_LAP2B	33333	33333	33333		55	2	[R].DILKEMFPYEASTPTGISASCR.[R]	DILkEMFPYEASTPTGISASCR	[K4](Biotin)	905.755	3	679	1	RVDRDILkEMFPYEA	33333	0	0	1	1	0	0	6	4	0	0	2.68208e+07	3.50007e+07	4; 194; 288; 294; 318; 349; 351; 368; 431; 434; 440; 481; 528; 531; 536; 540; 546; 593; 619; 636; 656; 657; 667; 679; 701; 722; 726	385	27	194; 288; 294; 368; 546; 619; 636; 667; 722; 726
BirA_LAP2B	33333	33333	33333		55	2	[K].QGALLLEQDGIIKPWMGGEISLR.[S]	QGALLLEQDGIIkPWMGGEISLR	[K13](Biotin)	917.485	3	318	0	LEQDGIIkPWMGGEI	33333	0	0	1	0	0	0	1	0	0	0	215831	0	4; 194; 288; 294; 318; 349; 351; 368; 431; 434; 440; 481; 528; 531; 536; 540; 546; 593; 619; 636; 656; 657; 667; 679; 701; 722; 726	385	27	194; 288; 294; 368; 546; 619; 636; 667; 722; 726
BirA_LAP2B	33333	33333	33333		55	2	[R].QNGSNDSDRYSDNDEDSKIELKLEK.[R]	QNGSNDSDRYSDNDEDSKIELkLEK	[K22](Biotin)	782.105	4	528	3	EDSKIELkLEKREPL	33333	0	0	1	0	0	0	1	0	0	0	2161974	0	4; 194; 288; 294; 318; 349; 351; 368; 431; 434; 440; 481; 528; 531; 536; 540; 546; 593; 619; 636; 656; 657; 667; 679; 701; 722; 726	385	27	194; 288; 294; 368; 546; 619; 636; 667; 722; 726
BirA_LAP2B	33333	33333	33333		55	2	[K].REPLKGR.[A]	REPLkGR	[K5](Biotin)	541.301	2	536	2	LEKREPLkGRAKTPV	33333	0	0	1	1	0	0	2	2	0	0	13495970	1.12707e+07	4; 194; 288; 294; 318; 349; 351; 368; 431; 434; 440; 481; 528; 531; 536; 540; 546; 593; 619; 636; 656; 657; 667; 679; 701; 722; 726	385	27	194; 288; 294; 368; 546; 619; 636; 667; 722; 726
BirA_LAP2B	33333	33333	33333		55	2	[R].RPIKGAAGRPLELSDFR.[M]	RPIkGAAGRPLELSDFR	[K4](Biotin)	528.041	4	701	1	ASCRRPIkGAAGRPL	33333	0	0	1	1	0	0	3	4	0	0	97716168	67947060	4; 194; 288; 294; 318; 349; 351; 368; 431; 434; 440; 481; 528; 531; 536; 540; 546; 593; 619; 636; 656; 657; 667; 679; 701; 722; 726	385	27	194; 288; 294; 368; 546; 619; 636; 667; 722; 726
BirA_LAP2B	33333	33333	33333		55	2	[R].RPIKGAAGRPLELSDFRMEESFSSK.[Y]	RPIkGAAGRPLELSDFRMEESFSSK	[K4](Biotin)	607.711	5	701	2	ASCRRPIkGAAGRPL	33333	0	0	1	0	0	0	1	0	0	0	356482	0	4; 194; 288; 294; 318; 349; 351; 368; 431; 434; 440; 481; 528; 531; 536; 540; 546; 593; 619; 636; 656; 657; 667; 679; 701; 722; 726	385	27	194; 288; 294; 368; 546; 619; 636; 667; 722; 726
BirA_LAP2B	33333	33333	33333		55	1	[R].RTPKKPLTR.[A]	RTPKKPLTR	[K](Biotin)			X	2
BirA_LAP2B	33333	33333	33333		55	1	[R].RTPKKPLTR.[A]	RTPkkPLTR	[K4; K5](Biotin)	516.955	3	656; 657	2	DITRRTPkKPLTRAE; ITRRTPKkPLTRAEV	33333	0	0	2	2	0	0	1	1	0	0	743059	557906	4; 194; 288; 294; 318; 349; 351; 368; 431; 434; 440; 481; 528; 531; 536; 540; 546; 593; 619; 636; 656; 657; 667; 679; 701; 722; 726	385	27	194; 288; 294; 368; 546; 619; 636; 667; 722; 726
BirA_LAP2B	33333	33333	33333		55	2	[R].RVDRDILKEMFPYEASTPTGISASCR.[R]	RVDRDILkEMFPYEASTPTGISASCR	[K8](Biotin)	811.142	4	679	3	RVDRDILkEMFPYEA	33333	0	0	1	1	0	0	7	7	0	0	1.23235e+08	1.61163e+08	4; 194; 288; 294; 318; 349; 351; 368; 431; 434; 440; 481; 528; 531; 536; 540; 546; 593; 619; 636; 656; 657; 667; 679; 701; 722; 726	385	27	194; 288; 294; 368; 546; 619; 636; 667; 722; 726
BirA_LAP2B	33333	33333	33333		55	2	[R].RVDRDILKEMFPYEASTPTGISASCR.[R]	RVDRDILkEMFPYEASTPTGISASCR	[K8](Biotin)	811.142	4	679	3	RVDRDILkEMFPYEA	33333	0	0	1	1	0	0	7	7	0	0	1.23235e+08	1.61163e+08	4; 194; 288; 294; 318; 349; 351; 368; 431; 434; 440; 481; 528; 531; 536; 540; 546; 593; 619; 636; 656; 657; 667; 679; 701; 722; 726	385	27	194; 288; 294; 368; 546; 619; 636; 667; 722; 726
BirA_LAP2B	33333	33333	33333		55	2	[R].DILKEMFPYEASTPTGISASCR.[R]	DILkEMFPYEASTPTGISASCR	[K4](Biotin)	905.755	3	679	1	RVDRDILkEMFPYEA	33333	0	0	1	1	0	0	6	4	0	0	2.68208e+07	3.50007e+07	4; 194; 288; 294; 318; 349; 351; 368; 431; 434; 440; 481; 528; 531; 536; 540; 546; 593; 619; 636; 656; 657; 667; 679; 701; 722; 726	385	27	194; 288; 294; 368; 546; 619; 636; 667; 722; 726
BirA_LAP2B	33333	33333	33333		55	2	[K].YVPKYAPLADVKSEKTK.[K]	YVPkYAPLADVKSEKTK	[K4](Biotin)	721.722	3	726	3	FSSKYVPkYAPLADV	33333	0	0	1	1	0	0	1	1	0	0	916199	150123	4; 194; 288; 294; 318; 349; 351; 368; 431; 434; 440; 481; 528; 531; 536; 540; 546; 593; 619; 636; 656; 657; 667; 679; 701; 722; 726	385	27	194; 288; 294; 368; 546; 619; 636; 667; 722; 726
BirA_LAP2B	33333	33333	33333		55	3	[K].DKLKSELVANNVTLPAGEQR.[K]	DKLKSELVANNVTLPAGEQR	[K](Biotin)			X	2
BirA_LAP2B	33333	33333	33333		55	1	[R].AEVGEKTEER.[R]	AEVGEkTEER	[K6](Biotin)	687.325	2	667	1	TRAEVGEkTEERRVD	33333	1	1	1	1	1	1	4	6	300500	29965.1	120855252	9.64959e+07	4; 194; 288; 294; 318; 349; 351; 368; 431; 434; 440; 481; 528; 531; 536; 540; 546; 593; 619; 636; 656; 657; 667; 679; 701; 722; 726	385	27	194; 288; 294; 368; 546; 619; 636; 667; 722; 726
BirA_LAP2B	33333	33333	33333		55	3	[K].DKLKSELVANNVTLPAGEQRK.[D]	DkLkSELVANNVTLPAGEQRK	[K2; K4](Biotin)	921.482	3	349; 351	3	PSVLTKDkLKSELVA; VLTKDKLkSELVANN	33333	0	0	2	0	0	0	1	0	0	0	970181	0	4; 194; 288; 294; 318; 349; 351; 368; 431; 434; 440; 481; 528; 531; 536; 540; 546; 593; 619; 636; 656; 657; 667; 679; 701; 722; 726	385	27	194; 288; 294; 368; 546; 619; 636; 667; 722; 726
BirA_LAP2B	33333	33333	33333		55	1	[R].AEVGEKTEERR.[V]	AEVGEkTEERR	[K6](Biotin)	510.584	3	667	2	TRAEVGEkTEERRVD	33333	0	0	1	1	0	0	1	1	0	0	1251828	1.20003e+06	4; 194; 288; 294; 318; 349; 351; 368; 431; 434; 440; 481; 528; 531; 536; 540; 546; 593; 619; 636; 656; 657; 667; 679; 701; 722; 726	385	27	194; 288; 294; 368; 546; 619; 636; 667; 722; 726
BirA_LAP2B	33333	33333	33333		55	2	[R].AKTPVTLKQR.[R]	AkTPVTLkQR	[K2; K8](Biotin)	797.434	2	540; 546	2	EPLKGRAkTPVTLKQ; AKTPVTLkQRRTEHN	33333	0	0	2	0	0	0	1	0	0	0	1.06577e+06	0	4; 194; 288; 294; 318; 349; 351; 368; 431; 434; 440; 481; 528; 531; 536; 540; 546; 593; 619; 636; 656; 657; 667; 679; 701; 722; 726	385	27	194; 288; 294; 368; 546; 619; 636; 667; 722; 726
BirA_LAP2B	33333	33333	33333		55	2	[R].AKTPVTLK.[Q]	AkTPVTLK	[K2](Biotin)	542.315	2	540	1	EPLKGRAkTPVTLKQ	33333	0	0	1	1	0	0	2	4	0	0	208200432	207826480	4; 194; 288; 294; 318; 349; 351; 368; 431; 434; 440; 481; 528; 531; 536; 540; 546; 593; 619; 636; 656; 657; 667; 679; 701; 722; 726	385	27	194; 288; 294; 368; 546; 619; 636; 667; 722; 726
BirA_LAP2B	33333	33333	33333		55	3	[K].DKLKSELVANNVTLPAGEQR.[K]	DkLkSELVANNVTLPAGEQR	[K2; K4](Biotin)	878.787	3	349; 351	2	PSVLTKDkLKSELVA; VLTKDKLkSELVANN	33333	0	0	2	2	0	0	1	2	0	0	1.30107e+06	1.14822e+06	4; 194; 288; 294; 318; 349; 351; 368; 431; 434; 440; 481; 528; 531; 536; 540; 546; 593; 619; 636; 656; 657; 667; 679; 701; 722; 726	385	27	194; 288; 294; 368; 546; 619; 636; 667; 722; 726
BirA_LAP2B	33333	33333	33333		55	3	[K].DKLKSELVANNVTLPAGEQRK.[D]	DKLKSELVANNVTLPAGEQRK	[K](Biotin)			X	3
BirA_LAP2B	33333	33333	33333		55	2	[R].AKTPVTLKQRR.[T]	AKTPVTLkQRR	[K8](Biotin)	381.726	4	546	3	AKTPVTLkQRRTEHN	33333	0	0	1	1	0	0	2	2	0	0	7.68886e+06	6.67029e+06	4; 194; 288; 294; 318; 349; 351; 368; 431; 434; 440; 481; 528; 531; 536; 540; 546; 593; 619; 636; 656; 657; 667; 679; 701; 722; 726	385	27	194; 288; 294; 368; 546; 619; 636; 667; 722; 726
BirA_LAP2B	33333	33333	33333		55	2	[R].AKTPVTLKQR.[R]	AKTPVTLkQR	[K8](Biotin)	456.601	3	546	2	AKTPVTLkQRRTEHN	33333	0	1	1	1	0	1	3	4	0	89348.4	305956726	188934824	4; 194; 288; 294; 318; 349; 351; 368; 431; 434; 440; 481; 528; 531; 536; 540; 546; 593; 619; 636; 656; 657; 667; 679; 701; 722; 726	385	27	194; 288; 294; 368; 546; 619; 636; 667; 722; 726
BirA_LAP2B	33333	33333	33333		55	2	[K].LEKREPLK.[G]	LEkREPLK	[K3](Biotin)	619.85	2	531	2	KIELKLEkREPLKGR	33333	0	0	1	1	0	0	2	1	0	0	3.18989e+06	273193	4; 194; 288; 294; 318; 349; 351; 368; 431; 434; 440; 481; 528; 531; 536; 540; 546; 593; 619; 636; 656; 657; 667; 679; 701; 722; 726	385	27	194; 288; 294; 368; 546; 619; 636; 667; 722; 726
BirA_LAP2B	33333	33333	33333		55	1	[R].IDGAVISESTPIAETIKASSNESLVANR.[L]	IDGAVISESTPIAETIkASSNESLVANR	[K17](Biotin)	1033.53	3	619	1	TPIAETIkASSNESL	33333	1	0	1	1	1	0	11	15	0	0	1.49781e+08	1.0868e+08	4; 194; 288; 294; 318; 349; 351; 368; 431; 434; 440; 481; 528; 531; 536; 540; 546; 593; 619; 636; 656; 657; 667; 679; 701; 722; 726	385	27	194; 288; 294; 368; 546; 619; 636; 667; 722; 726
BirA_LAP2B	33333	33333	33333		55	3	[K].KTDKPRLEDKDDLDVTELSNEELLDQLVR.[Y]	KTDKPRLEDKDDLDVTELSNEELLDQLVR	[K](Biotin)			X	3
BirA_LAP2B	33333	33333	33333		55	1	[R].LTGNFKHASSILPITEFSDITRR.[T]	LTGNFkHASSILPITEFSDITRR	[K6](Biotin)	708.125	4	636	2	NRLTGNFkHASSILP	33333	1	1	1	1	1	2	8	13	765368	159191	4.44e+08	2.78748e+08	4; 194; 288; 294; 318; 349; 351; 368; 431; 434; 440; 481; 528; 531; 536; 540; 546; 593; 619; 636; 656; 657; 667; 679; 701; 722; 726	385	27	194; 288; 294; 368; 546; 619; 636; 667; 722; 726
BirA_LAP2B	33333	33333	33333		55	2	[K].YVPKYAPLADVK.[S]	YVPkYAPLADVK	[K4](Biotin)	795.425	2	726	1	FSSKYVPkYAPLADV	33333	0	1	1	1	0	1	2	4	0	15499.8	59198532	3.52316e+07	4; 194; 288; 294; 318; 349; 351; 368; 431; 434; 440; 481; 528; 531; 536; 540; 546; 593; 619; 636; 656; 657; 667; 679; 701; 722; 726	385	27	194; 288; 294; 368; 546; 619; 636; 667; 722; 726
BirA_LAP2B	33333	33333	33333		55	3	[R].LEDKDDLDVTELSNEELLDQLVR.[Y]	LEDkDDLDVTELSNEELLDQLVR	[K4](Biotin)	1464.21	2	440	1	DKPRLEDkDDLDVTE	33333	0	0	1	0	0	0	2	0	0	0	2.00501e+06	0	4; 194; 288; 294; 318; 349; 351; 368; 431; 434; 440; 481; 528; 531; 536; 540; 546; 593; 619; 636; 656; 657; 667; 679; 701; 722; 726	385	27	194; 288; 294; 368; 546; 619; 636; 667; 722; 726
BirA_LAP2B	33333	33333	33333		55	1	[K].ASSNESLVANRLTGNFKHASSILPITEFSDITR.[R]	ASSNESLVANRLTGNFkHASSILPITEFSDITR	[K17](Biotin)	951.236	4	636	2	NRLTGNFkHASSILP	33333	0	0	1	1	0	0	1	3	0	0	821911	1.48662e+06	4; 194; 288; 294; 318; 349; 351; 368; 431; 434; 440; 481; 528; 531; 536; 540; 546; 593; 619; 636; 656; 657; 667; 679; 701; 722; 726	385	27	194; 288; 294; 368; 546; 619; 636; 667; 722; 726
BirA_LAP2B	33333	33333	33333		55	3	[R].KDVYVQLYLQHLTAR.[N]	kDVYVQLYLQHLTAR	[K1](Biotin)	691.704	3	368	1	LPAGEQRkDVYVQLY	33333	0	1	1	1	0	2	4	6	0	158105	8.1752e+07	1.37083e+08	4; 194; 288; 294; 318; 349; 351; 368; 431; 434; 440; 481; 528; 531; 536; 540; 546; 593; 619; 636; 656; 657; 667; 679; 701; 722; 726	385	27	194; 288; 294; 368; 546; 619; 636; 667; 722; 726
BirA_LAP2B	33333	33333	33333		55	1	[R].LTGNFKHASSILPITEFSDITR.[R]	LTGNFkHASSILPITEFSDITR	[K6](Biotin)	891.796	3	636	1	NRLTGNFkHASSILP	33333	1	1	1	1	1	3	9	32	1108492	474897	654422587	1.59513e+09	4; 194; 288; 294; 318; 349; 351; 368; 431; 434; 440; 481; 528; 531; 536; 540; 546; 593; 619; 636; 656; 657; 667; 679; 701; 722; 726	385	27	194; 288; 294; 368; 546; 619; 636; 667; 722; 726
BirA_LAP2B	33333	33333	33333		55	2	[R].GIDKQGALLLEQDGIIKPWMGGEISLR.[S]	GIDKQGALLLEQDGIIKPWMGGEISLR	[K](Biotin)			X	1
BirA_LAP2B	33333	33333	33333		55	2	[R].KLAGILVELTGK.[T]	kLAGILVELTGK	[K1](Biotin)	734.434	2	194	1	DLYLQDRkLAGILVE	33333	1	1	1	1	2	1	6	10	624030	24326.4	4.61296e+07	8.10889e+07	4; 194; 288; 294; 318; 349; 351; 368; 431; 434; 440; 481; 528; 531; 536; 540; 546; 593; 619; 636; 656; 657; 667; 679; 701; 722; 726	385	27	194; 288; 294; 368; 546; 619; 636; 667; 722; 726
BirA_LAP2B	33333	33333	33333		55	2	[K].LDNFINRPVKLIIGDKEIFGISR.[G]	LDNFINRPVkLIIGDKEIFGISR	[K10](Biotin)	721.654	4	288	2	NFINRPVkLIIGDKE	33333	1	0	1	1	1	0	3	8	162264	0	6.86682e+06	1.52829e+07	4; 194; 288; 294; 318; 349; 351; 368; 431; 434; 440; 481; 528; 531; 536; 540; 546; 593; 619; 636; 656; 657; 667; 679; 701; 722; 726	385	27	194; 288; 294; 368; 546; 619; 636; 667; 722; 726
BirA_LAP2B	33333	33333	33333		55	2	[R].MEESFSSKYVPKYAPLADVK.[S]	MEESFSSkYVPkYAPLADVK	[K8; K12](Biotin)	919.771	3	722; 726	2	MEESFSSkYVPKYAP; FSSKYVPkYAPLADV	33333	0	0	2	2	0	0	4	2	0	0	6.74203e+06	2.25238e+06	4; 194; 288; 294; 318; 349; 351; 368; 431; 434; 440; 481; 528; 531; 536; 540; 546; 593; 619; 636; 656; 657; 667; 679; 701; 722; 726	385	27	194; 288; 294; 368; 546; 619; 636; 667; 722; 726
BirA_LAP2B	33333	33333	33333		55	2	[K].LIIGDKEIFGISR.[G]	LIIGDkEIFGISR	[K6](Biotin)	843.967	2	294	1	VKLIIGDkEIFGISR	33333	1	1	1	1	3	6	17	20	3.87176e+06	336754	3.10759e+08	3.18821e+08	4; 194; 288; 294; 318; 349; 351; 368; 431; 434; 440; 481; 528; 531; 536; 540; 546; 593; 619; 636; 656; 657; 667; 679; 701; 722; 726	385	27	194; 288; 294; 368; 546; 619; 636; 667; 722; 726
BirA_LAP2B	33333	33333	33333		55	4	[R].KLYEKK.[IL]	KLYEKK	[K](Biotin)			X	2
BirA_LAP2B	33333	33333	33333		55	1	[R].IDGAVISESTPIAETIKASSNESLVANRLTGNFK.[H]	IDGAVISESTPIAETIkASSNESLVANRLTGNFK	[K17](Biotin)	1253.64	3	619	2	TPIAETIkASSNESL	33333	0	0	1	0	0	0	1	0	0	0	0	0	4; 194; 288; 294; 318; 349; 351; 368; 431; 434; 440; 481; 528; 531; 536; 540; 546; 593; 619; 636; 656; 657; 667; 679; 701; 722; 726	385	27	194; 288; 294; 368; 546; 619; 636; 667; 722; 726
Tmem214	68796	31559970	NP_653108.2	transmembrane protein 214 [Mus musculus]	42	1	[R].GFEKIMK.[R]	GFEkIMK	[K4](Biotin)	539.775	2	66	1	LYERGFEkIMKRQNK	31559970	0	0	0	1	0	0	0	1	0	0	0	783548	66	3	1
Tmem214	68796	31559970	NP_653108.2	transmembrane protein 214 [Mus musculus]	42	1	[R].GFEKIMKR.[Q]	GFEkIMKR	[K4](Biotin)	412.22	3	66	2	LYERGFEkIMKRQNK	31559970	0	0	1	1	0	0	1	1	0	0	1.88287e+06	1.79001e+06	66	3	1
Cdkal1	68916	21617853	NP_653119.1	threonylcarbamoyladenosine tRNA methylthiotransferase isoform 1 [Mus musculus]	43	1	[R].KHVFPKVR.[R]	KHVFPkVR	[K6](Biotin)	412.906	3	37	2	SRKHVFPkVRRRNTQ	21617853	0	0	1	0	0	0	1	0	0	0	221649	0	37; 64	2	2
Cdkal1	68916	21617853	NP_653119.1	threonylcarbamoyladenosine tRNA methylthiotransferase isoform 1 [Mus musculus]	43	1	[K].YLQEEPRPPSDSTIPGIQKIWIR.[T]	YLQEEPRPPSDSTIPGIQkIWIR	[K19](Biotin)	983.85	3	64	1	STIPGIQkIWIRTWG	21617853	0	0	1	0	0	0	1	0	0	0	193785	0	37; 64	2	2
Vangl1	229658	260099697	NP_808213.2	vang-like protein 1 [Mus musculus]	26	1	[K].HMAGLKVYNVDGPSNNATGQSR.[A]	HMAGLkVYNVDGPSNNATGQSR	[K6](Biotin)	848.071	3	312	1	AKHMAGLkVYNVDGP	260099697	0	0	1	1	0	0	3	1	0	0	2.5484e+06	1.1383e+06	312	8	1
Vangl1	229658	260099697	NP_808213.2	vang-like protein 1 [Mus musculus]	26	1	[K].HMAGLKVYNVDGPSNNATGQSR.[A]	HMAGLkVYNVDGPSNNATGQSR	[K6](Biotin)	848.071	3	312	1	AKHMAGLkVYNVDGP	260099697	0	0	1	1	0	0	3	1	0	0	2.5484e+06	1.1383e+06	312	8	1
Arl6ip6	65103	254281227	NP_075365.3	ADP-ribosylation factor-like protein 6-interacting protein 6 [Mus musculus]	7	1	[R].VGDGSPVLPDKR.[N]	VGDGSPVLPDkR	[K11](Biotin)	733.378	2	86	1	GSPVLPDkRNGIFPA	254281227	0	0	1	0	0	0	1	0	0	0	1.35544e+06	0	86	1	1
Atp6ap2	70495	21361250	NP_081715.1	renin receptor precursor [Mus musculus]	14	1	[R].MTNQKIR.[I]	MTNQkIR	[K5](Biotin)	566.784	2	346	1	IYRMTNQkIRID	21361250	0	0	1	1	0	0	2	1	0	0	2.34431e+06	1.79797e+06	346	7	1
Atp6ap2	70495	21361250	NP_081715.1	renin receptor precursor [Mus musculus]	14	1	[R].MTNQKIRID.[-]	MTNQkIRID	[K5](Biotin)	672.843	2	346	2	IYRMTNQkIRID	21361250	0	0	0	1	0	0	0	1	0	0	0	1.67626e+06	346	7	1
Atp6ap2	70495	21361250	NP_081715.1	renin receptor precursor [Mus musculus]	14	1	[R].MTNQKIR.[I]	MTNQkIR	[K5](Biotin)	566.784	2	346	1	IYRMTNQkIRID	21361250	0	0	1	1	0	0	2	1	0	0	2.34431e+06	1.79797e+06	346	7	1
Lemd3	380664	145864461	NP_001074662.2	inner nuclear membrane protein Man1 [Mus musculus]	42	1	[K].KLAPLLSPPSPDGDSTLESPTGPLLK.[T]	kLAPLLSPPSPDGDSTLESPTGPLLK	[K1](Biotin)	952.839	3	370	1	RYRAGAKkLAPLLSP	145864461	0	0	1	0	0	0	1	0	0	0	144174	0	281; 296; 370; 446; 453; 695; 763; 770	17	8
Lemd3	380664	145864461	NP_001074662.2	inner nuclear membrane protein Man1 [Mus musculus]	42	1	[K].TAYGKPKLCEPEEELLQQFK.[R]	TAYGKPkLCEPEEELLQQFK	[K7](Biotin)	878.77	3	453	1	KTAYGKPkLCEPEEE	145864461	0	0	1	0	0	0	1	0	0	0	177418	0	281; 296; 370; 446; 453; 695; 763; 770	17	8
Lemd3	380664	145864461	NP_001074662.2	inner nuclear membrane protein Man1 [Mus musculus]	42	1	[K].TAYGKPKLCEPEEELLQQFKR.[E]	TAYGKPKLCEPEEELLQQFKR	[K](Biotin)			X	2
Lemd3	380664	145864461	NP_001074662.2	inner nuclear membrane protein Man1 [Mus musculus]	42	1	[K].TLVIPSKVWQGQAFHLDRR.[N]	TLVIPSkVWQGQAFHLDRR	[K7](Biotin)	620.088	4	770	2	KTLVIPSkVWQGQAF	145864461	0	0	1	1	0	0	2	1	0	0	4477415	827634	281; 296; 370; 446; 453; 695; 763; 770	17	8
Lemd3	380664	145864461	NP_001074662.2	inner nuclear membrane protein Man1 [Mus musculus]	42	1	[R].WIQPSASCDKTLVIPSK.[V]	WIQPSASCDkTLVIPSK	[K10](Biotin)	719.368	3	763	1	QPSASCDkTLVIPSK	145864461	0	0	1	1	0	0	1	1	0	0	534011	0	281; 296; 370; 446; 453; 695; 763; 770	17	8
Lemd3	380664	145864461	NP_001074662.2	inner nuclear membrane protein Man1 [Mus musculus]	42	1	[R].WIQPSASCDKTLVIPSKVWQGQAFHLDRR.[N]	WIQPSASCDKTLVIPSKVWQGQAFHLDRR	[K](Biotin)			X	3
Lemd3	380664	145864461	NP_001074662.2	inner nuclear membrane protein Man1 [Mus musculus]	42	1	[R].SHSKPFSALTAK.[S]	SHSkPFSALTAK	[K4](Biotin)	500.594	3	296	0	RPRRSHSkPFSALTA	145864461	0	0	1	0	0	0	1	0	0	0	291165	0	281; 296; 370; 446; 453; 695; 763; 770	17	8
Lemd3	380664	145864461	NP_001074662.2	inner nuclear membrane protein Man1 [Mus musculus]	42	1	[R].RSHSKPFSALTAK.[S]	RSHSkPFSALTAK	[K5](Biotin)	552.626	3	296	1	RPRRSHSkPFSALTA	145864461	0	0	1	0	0	0	2	0	0	0	520883	0	281; 296; 370; 446; 453; 695; 763; 770	17	8
Lemd3	380664	145864461	NP_001074662.2	inner nuclear membrane protein Man1 [Mus musculus]	42	1	[R].INHANHTGSNHTYLKTAYGKPK.[L]	INHANHTGSNHTYLkTAYGKPK	[K15](Biotin)	670.337	4	446	1	GSNHTYLkTAYGKPK	145864461	0	0	1	1	0	0	2	2	0	0	6575420	5.79079e+06	281; 296; 370; 446; 453; 695; 763; 770	17	8
Lemd3	380664	145864461	NP_001074662.2	inner nuclear membrane protein Man1 [Mus musculus]	42	1	[R].SHNEACQETKDLQPYMPLPHVR.[D]	SHNEACQETkDLQPYMPLPHVR	[K10](Biotin)	719.838	4	695	1	NEACQETkDLQPYMP	145864461	0	0	0	1	0	0	0	1	0	0	0	697982	281; 296; 370; 446; 453; 695; 763; 770	17	8
Lemd3	380664	145864461	NP_001074662.2	inner nuclear membrane protein Man1 [Mus musculus]	42	1	[R].QVLKDDSLAR.[H]	QVLkDDSLAR	[K4](Biotin)	685.859	2	281	1	APARQVLkDDSLARH	145864461	0	0	1	1	0	0	1	1	0	0	1242431	1.10744e+06	281; 296; 370; 446; 453; 695; 763; 770	17	8
Pgrmc2	70804	226442772	NP_081834.1	membrane-associated progesterone receptor component 2 [Mus musculus]	12	1	[K].GSKFYGPAGPYGIFAGR.[D]	GSkFYGPAGPYGIFAGR	[K3](Biotin)	985.985	2	129	1	FDVTKGSkFYGPAGP	226442772	0	0	1	1	0	0	4	6	0	0	7.5765e+06	8.5654e+06	129	10	1
Pgrmc2	70804	226442772	NP_081834.1	membrane-associated progesterone receptor component 2 [Mus musculus]	12	1	[K].VFDVTKGSKFYGPAGPYGIFAGR.[D]	VFDVTKGSKFYGPAGPYGIFAGR	[K](Biotin)			X	2
Lbr	98386	568911330	XP_006497134.1	lamin-B receptor isoform X1 [Mus musculus]	35	1	[K].LAHLKTIHTSTGK.[S]	LAHLkTIHTSTGK	[K5](Biotin)	408.977	4	535	1	DPKLAHLkTIHTSTG	568911330	0	0	1	0	0	0	1	0	0	0	410015	0	64; 126; 133; 159; 200; 535	84	6	126; 133; 159
Lbr	98386	568911330	XP_006497134.1	lamin-B receptor isoform X1 [Mus musculus]	35	1	[K].LTPLVLKPFGNSVSVYNGEPEHMEK.[N]	LTPLVLkPFGNSVSVYNGEPEHMEK	[K7](Biotin)	1004.51	3	133	0	KLTPLVLkPFGNSVS	568911330	1	0	1	1	2	0	5	9	1.00625e+06	0	3.44623e+07	50755306	64; 126; 133; 159; 200; 535	84	6	126; 133; 159
Lbr	98386	568911330	XP_006497134.1	lamin-B receptor isoform X1 [Mus musculus]	35	1	[R].KSGSISSSPSR.[R]	kSGSISSSPSR	[K1](Biotin)	659.824	2	64	1	LKSFKQRkSGSISSS	568911330	0	0	1	0	0	0	1	0	0	0	38813	0	64; 126; 133; 159; 200; 535	84	6	126; 133; 159
Lbr	98386	568911330	XP_006497134.1	lamin-B receptor isoform X1 [Mus musculus]	35	1	[K].EIESEEQNLVTKGPAPLGTFQVTTPQR.[K]	EIESEEQNLVTkGPAPLGTFQVTTPQR	[K12](Biotin)	1065.87	3	200	1	EEQNLVTkGPAPLGT	568911330	0	0	0	1	0	0	0	1	0	0	0	217561	64; 126; 133; 159; 200; 535	84	6	126; 133; 159
Lbr	98386	568911330	XP_006497134.1	lamin-B receptor isoform X1 [Mus musculus]	35	1	[R].EILQVKLTPLVLKPFGNSVSVYNGEPEHMEK.[N]	EILQVkLTPLVLkPFGNSVSVYNGEPEHMEK	[K6; K13](Biotin)	991.762	4	126; 133	1	RREILQVkLTPLVLK; KLTPLVLkPFGNSVS	568911330	0	0	2	0	0	0	1	0	0	0	60876.5	0	64; 126; 133; 159; 200; 535	84	6	126; 133; 159
Lbr	98386	568911330	XP_006497134.1	lamin-B receptor isoform X1 [Mus musculus]	35	1	[R].REILQVKLTPLVLKPFGNSVSVYNGEPEHMEK.[N]	REILQVkLTPLVLKPFGNSVSVYNGEPEHMEK	[K7](Biotin)	970.269	4	126	2	RREILQVkLTPLVLK	568911330	0	0	1	1	0	0	3	2	0	0	2.99816e+06	1.29662e+06	64; 126; 133; 159; 200; 535	84	6	126; 133; 159
Lbr	98386	568911330	XP_006497134.1	lamin-B receptor isoform X1 [Mus musculus]	35	1	[R].EILQVKLTPLVLKPFGNSVSVYNGEPEHMEK.[N]	EILQVkLTPLVLKPFGNSVSVYNGEPEHMEK	[K6](Biotin)	931.241	4	126	1	RREILQVkLTPLVLK	568911330	1	0	1	1	1	0	3	9	408537	0	12456099	2.28321e+07	64; 126; 133; 159; 200; 535	84	6	126; 133; 159
Lbr	98386	568911330	XP_006497134.1	lamin-B receptor isoform X1 [Mus musculus]	35	1	[K].AKEIESEEQNLVTKGPAPLGTFQVTTPQRK.[D]	AKEIESEEQNLVTkGPAPLGTFQVTTPQRK	[K14](Biotin)	881.465	4	200	3	EEQNLVTkGPAPLGT	568911330	0	0	1	1	0	0	4	3	0	0	7.91632e+06	5073920	64; 126; 133; 159; 200; 535	84	6	126; 133; 159
Lbr	98386	568911330	XP_006497134.1	lamin-B receptor isoform X1 [Mus musculus]	35	1	[R].REILQVKLTPLVLKPFGNSVSVYNGEPEHMEK.[N]	REILQVkLTPLVLKPFGNSVSVYNGEPEHMEK	[K7](Biotin)	970.269	4	126	2	RREILQVkLTPLVLK	568911330	0	0	1	1	0	0	3	2	0	0	2.99816e+06	1.29662e+06	64; 126; 133; 159; 200; 535	84	6	126; 133; 159
Lbr	98386	568911330	XP_006497134.1	lamin-B receptor isoform X1 [Mus musculus]	35	1	[K].NATPYKDKQER.[I]	NATPYKDkQER	[K8](Biotin)	788.383	2	159	2	NATPYKDkQERIILS	568911330	1	1	1	1	1	1	2	2	280861	45189.8	8.84835e+06	8.0017e+06	64; 126; 133; 159; 200; 535	84	6	126; 133; 159
Lbr	98386	568911330	XP_006497134.1	lamin-B receptor isoform X1 [Mus musculus]	35	1	[K].LTPLVLKPFGNSVSVYNGEPEHMEK.[N]	LTPLVLkPFGNSVSVYNGEPEHMEK	[K7](Biotin)	1004.51	3	133	0	KLTPLVLkPFGNSVS	568911330	1	0	1	1	2	0	5	9	1.00625e+06	0	3.44623e+07	50755306	64; 126; 133; 159; 200; 535	84	6	126; 133; 159
Lbr	98386	568911330	XP_006497134.1	lamin-B receptor isoform X1 [Mus musculus]	35	1	[R].EILQVKLTPLVLKPFGNSVSVYNGEPEHMEK.[N]	EILQVkLTPLVLKPFGNSVSVYNGEPEHMEK	[K6](Biotin)	931.241	4	126	1	RREILQVkLTPLVLK	568911330	1	0	1	1	1	0	3	9	408537	0	12456099	2.28321e+07	64; 126; 133; 159; 200; 535	84	6	126; 133; 159
Lbr	98386	568911330	XP_006497134.1	lamin-B receptor isoform X1 [Mus musculus]	35	1	[K].EIESEEQNLVTKGPAPLGTFQVTTPQRK.[D]	EIESEEQNLVTkGPAPLGTFQVTTPQRK	[K12](Biotin)	1108.57	3	200	2	EEQNLVTkGPAPLGT	568911330	0	0	1	1	0	0	3	4	0	0	8.37081e+06	4.21289e+06	64; 126; 133; 159; 200; 535	84	6	126; 133; 159
Clint1	216705	568972933	XP_006532901.1	clathrin interactor 1 isoform X1 [Mus musculus]	41	1	[-].MLNMWKVR.[E]	MLNMWkVR	[K6](Biotin)	673.331	2	6	1	MLNMWkVRELVDK	568972933	0	0	1	0	0	0	1	0	0	0	26215.6	0	6	1	1
Vamp1	22317	6678549	NP_033522.1	vesicle-associated membrane protein 1 isoform a [Mus musculus]	7	1	[R].VNVDKVLER.[D]	VNVDkVLER	[K5](Biotin)	649.353	2	54	1	IMRVNVDkVLERDQK	6678549	0	0	1	0	0	0	1	0	0	0	272849	0	54	1	1
Syne2	319565	145699091	NP_001005510.2	nesprin-2 [Mus musculus]	509	1	[K].HMEGDRTEAPVPTDASTPFKSDYVK.[L]	HMEGDRTEAPVPTDASTPFkSDYVK	[K20](Biotin)	751.852	4	6477	2	TDASTPFkSDYVKLL	145699091	0	0	1	1	0	0	1	1	0	0	2153960	1.39749e+06	6477; 6482	7	2
Syne2	319565	145699091	NP_001005510.2	nesprin-2 [Mus musculus]	509	1	[K].HMEGDRTEAPVPTDASTPFKSDYVKLLLR.[Q]	HMEGDRTEAPVPTDASTPFKSDYVkLLLR	[K25](Biotin)	875.69	4	6482	3	PFKSDYVkLLLRQGT	145699091	0	0	1	1	0	0	2	2	0	0	1.58642e+06	745405	6477; 6482	7	2
Syne2	319565	145699091	NP_001005510.2	nesprin-2 [Mus musculus]	509	1	[K].SDYVKLLLR.[Q]	SDYVkLLLR	[K5](Biotin)	666.871	2	6482	1	PFKSDYVkLLLRQGT	145699091	0	0	0	1	0	0	0	1	0	0	0	667820	6477; 6482	7	2
Hmgn3	94353	568962379	XP_006511654.1	high mobility group nucleosome-binding domain-containing protein 3 isoform X1 [Mus musculus]	19	1	[R].VKGTVDILHACSD.[-]	VkGTVDILHACSD	[K2](Biotin)	820.892	2	120	1	QIETVRVkGTVDILH	568962379	1	0	0	0	1	0	0	0	580829	0	0	0				120
Syne1	64009	119120865	NP_001073154.1	nesprin-1 isoform 3 [Mus musculus]	187	2	[K].IKGYQEQIDSLNSKCK.[M]	IKGYQEQIDSLNSkCK	[K14](Biotin)	713.021	3	23	2	QIDSLNSkCKMLTMK	119120865	0	0	1	1	0	0	1	1	0	0	499254	401259	9; 23; 2554; 2573	5	4
Syne1	64009	119120865	NP_001073154.1	nesprin-1 isoform 3 [Mus musculus]	187	2	[R].QLDKALDDSR.[F]	QLDkALDDSR	[K4](Biotin)	693.838	2	2554	1	SQMRQLDkALDDSRF	119120865	0	0	1	0	0	0	1	0	0	0	259139	0	9; 23; 2554; 2573	5	4
Syne1	64009	119120865	NP_001073154.1	nesprin-1 isoform 3 [Mus musculus]	187	2	[R].SKTPTGPDLDTSYK.[G]	SkTPTGPDLDTSYK	[K2](Biotin)	868.413	2	2573	1	TANILRSkTPTGPDL	119120865	0	0	1	0	0	0	1	0	0	0	306481	0	9; 23; 2554; 2573	5	4
Syne1	64009	119120865	NP_001073154.1	nesprin-1 isoform 3 [Mus musculus]	187	1	[-].MFPQELAQKIK.[G]	MFPQELAQkIK	[K9](Biotin)	800.915	2	9	1	FPQELAQkIKGYQEQ	119120865	0	0	1	0	0	0	1	0	0	0	338356	0	9; 23; 2554; 2573	5	4
Wwox	80707	31980962	NP_062519.2	WW domain-containing oxidoreductase [Mus musculus]	18	1	[R].TTKDGWVYYANHTEEKTQWEHPKTGK.[R]	TTkDGWVYYANHTEEKTQWEHPKTGK	[K3](Biotin)	672.923	5	28	3	GWEERTTkDGWVYYA	31980962	0	0	1	1	0	0	1	1	0	0	549105	488712	28	7	1	28
Wwox	80707	31980962	NP_062519.2	WW domain-containing oxidoreductase [Mus musculus]	18	1	[R].TTKDGWVYYANHTEEKTQWEHPK.[T]	TTkDGWVYYANHTEEKTQWEHPK	[K3](Biotin)	615.688	5	28	2	GWEERTTkDGWVYYA	31980962	1	0	1	1	1	0	2	1	503317	0	3.54621e+06	1.55083e+06	28	7	1	28
Wwox	80707	31980962	NP_062519.2	WW domain-containing oxidoreductase [Mus musculus]	18	1	[R].TTKDGWVYYANHTEEK.[T]	TTkDGWVYYANHTEEK	[K3](Biotin)	723.333	3	28	1	GWEERTTkDGWVYYA	31980962	1	1	1	1	1	1	1	1	691319	62328	3.80703e+06	2.3249e+06	28	7	1	28
Itpr3	16440	568999131	XP_006523775.1	inositol 1,4,5-trisphosphate receptor type 3 isoform X1 [Mus musculus]	163	1	[R].SAANYKTATR.[T]	SAANYkTATR	[K6](Biotin)	654.822	2	1671	1	QRSAANYkTATRTFP	568999131	0	0	1	1	0	0	1	1	0	0	354585	258151	1671	2	1
Zc3hav1	78781	568943224	XP_006506842.1	zinc finger CCCH-type antiviral protein 1 isoform X1 [Mus musculus]	55	1	[K].SAVTGGKEAVYSGVQSLR.[S]	SAVTGGkEAVYSGVQSLR	[K7](Biotin)	679.016	3	504	1	KSAVTGGkEAVYSGV	568943224	0	0	1	1	0	0	1	1	0	0	224299	74545.7	504; 556	3	2
Zc3hav1	78781	568943224	XP_006506842.1	zinc finger CCCH-type antiviral protein 1 isoform X1 [Mus musculus]	55	1	[R].VAASGSPGKSSTHASVSPASEPSR.[M]	VAASGSPGkSSTHASVSPASEPSR	[K9](Biotin)	827.4	3	556	1	AASGSPGkSSTHASV	568943224	0	0	0	1	0	0	0	1	0	0	0	0	504; 556	3	2
Actn4	60595	11230802	NP_068695.1	alpha-actinin-4 [Mus musculus]	56	1	[K].NVNVQNFHISWKDGLAFNALIHR.[H]	NVNVQNFHISWkDGLAFNALIHR	[K12](Biotin)	730.627	4	194	1	QNFHISWkDGLAFNA	11230802	1	0	0	0	1	0	0	0	76400.7	0	0	0				194
Ssfa2	70599	194473671	NP_542125.3	sperm-specific antigen 2 homolog [Mus musculus]	56	1	[K].TLSKLNLCVDKTEKGEGGSSPATEK.[G]	TLSkLNLCVDKTEKGEGGSSPATEK	[K4](Biotin)	719.609	4	300	3	RLMKTLSkLNLCVDK	194473671	0	0	1	0	0	0	1	0	0	0	275282	0	300; 580	3	2
Ssfa2	70599	194473671	NP_542125.3	sperm-specific antigen 2 homolog [Mus musculus]	56	1	[R].AKVEIVAEKR.[K]	AkVEIVAEKR	[K2](Biotin)	456.927	3	580	2	PLQKGRAkVEIVAEK	194473671	0	0	1	1	0	0	1	1	0	0	2.21166e+06	1.32813e+06	300; 580	3	2
Ptbp3	230257	568926551	XP_006537914.1	polypyrimidine tract-binding protein 3 isoform X1 [Mus musculus]	31	3	[K].YNNDKSR.[D]	YNNDkSR	[K5](Biotin)	561.756	2	273	1	NVKYNNDkSRDFTRL	568926551	1	0	0	0	1	0	0	0	45313.5	0	0	0				273
Igf2r	16004	133778978	NP_034645.2	cation-independent mannose-6-phosphate receptor precursor [Mus musculus]	138	1	[R].KPTAPAKLVSFHDDSDEDLLHI.[-]	KPTAPAKLVSFHDDSDEDLLHI	[K](Biotin)			X	1
Mccc1	72039	186700620	NP_076133.3	methylcrotonoyl-CoA carboxylase subunit alpha, mitochondrial [Mus musculus]	44	1	[K].AGDSLMVMIAMKMEHTIKAPK.[D]	AGDSLMVMIAMkMEHTIKAPK	[K12](Biotin)	636.819	4	677	2	LMVMIAMkMEHTIKA	186700620	1	0	1	1	3	0	6	2	641916	0	1.24057e+06	1.23933e+06	677	18	1	677
Mccc1	72039	186700620	NP_076133.3	methylcrotonoyl-CoA carboxylase subunit alpha, mitochondrial [Mus musculus]	44	1	[K].AGDSLMVMIAMKMEHTIKAPK.[D]	AGDSLMVMIAMkMEHTIKAPK	[K12](Biotin)	636.819	4	677	2	LMVMIAMkMEHTIKA	186700620	1	0	1	1	3	0	6	2	641916	0	1.24057e+06	1.23933e+06	677	18	1	677
Mccc1	72039	186700620	NP_076133.3	methylcrotonoyl-CoA carboxylase subunit alpha, mitochondrial [Mus musculus]	44	1	[K].AGDSLMVMIAMKMEHTIKAPKDGR.[I]	AGDSLMVMIAMkMEHTIKAPKDGR	[K12](Biotin)	572.088	5	677	3	LMVMIAMkMEHTIKA	186700620	1	0	0	1	1	0	0	1	132869	0	0	88937.1	677	18	1	677
Mccc1	72039	186700620	NP_076133.3	methylcrotonoyl-CoA carboxylase subunit alpha, mitochondrial [Mus musculus]	44	1	[K].AGDSLMVMIAMKMEHTIK.[A]	AGDSLMVMIAMkMEHTIK	[K12](Biotin)	744.696	3	677	1	LMVMIAMkMEHTIKA	186700620	1	0	1	0	1	0	1	0	505551	0	437853	0	677	18	1	677
Zfp516	329003	569005379	XP_006526562.1	zinc finger protein 516 isoform X1 [Mus musculus]	72	1	[K].TYIPKDFATLYQGWGVSSPGPEHR.[G]	TYIPkDFATLYQGWGVSSPGPEHR	[K5](Biotin)	978.144	3	1056	1	IFKTYIPkDFATLYQ	569005379	1	1	0	0	3	1	0	0	1.05102e+06	56437.9	0	0				138; 1051; 1056
Zfp516	329003	569005379	XP_006526562.1	zinc finger protein 516 isoform X1 [Mus musculus]	72	1	[R].VLNGAVPMDGSKILLR.[S]	VLNGAVPMDGSkILLR	[K12](Biotin)	637.017	3	138	1	AVPMDGSkILLRSSR	569005379	1	0	0	0	1	0	0	0	67503.6	0	0	0				138; 1051; 1056
Zfp516	329003	569005379	XP_006526562.1	zinc finger protein 516 isoform X1 [Mus musculus]	72	1	[K].RLDILSIFKTYIPK.[D]	RLDILSIFkTYIPK	[K9](Biotin)	645.038	3	1051	2	LDILSIFkTYIPKDF	569005379	1	0	0	0	1	0	0	0	350749	0	0	0				138; 1051; 1056
Urb1	207932	256818750	NP_083773.1	nucleolar pre-ribosomal-associated protein 1 [Mus musculus]	134	1	[R].SLGKSLWQQPSVGDILR.[L]	SLGkSLWQQPSVGDILR	[K4](Biotin)	704.042	3	1582	1	KTCRSLGkSLWQQPS	256818750	1	1	0	0	1	1	0	0	198234	25737.2	0	0				1582
Ahctf1	226747	568910764	XP_006496863.1	protein ELYS isoform X1 [Mus musculus]	128	1	[K].TSDKNTYFPLDVPAKGPQKVVAESLATHSGR.[L]	TSDkNTYFPLDVPAKGPQKVVAESLATHSGR	[K4](Biotin)	708.766	5	1352	3	EWMKTSDkNTYFPLD	568910764	0	0	1	0	0	0	1	0	0	0	624637	0	1328; 1337; 1352; 1382; 1745; 1771; 2078; 2267; 2307	18	9
Ahctf1	226747	568910764	XP_006496863.1	protein ELYS isoform X1 [Mus musculus]	128	1	[K].VVAESLATHSGRLEKLDVSKEDSTASTR.[S]	VVAESLATHSGRLEkLDVSKEDSTASTR	[K15](Biotin)	803.912	4	1382	3	THSGRLEkLDVSKED	568910764	0	0	0	1	0	0	0	1	0	0	0	170080	1328; 1337; 1352; 1382; 1745; 1771; 2078; 2267; 2307	18	9
Ahctf1	226747	568910764	XP_006496863.1	protein ELYS isoform X1 [Mus musculus]	128	1	[R].NTKAFVSTSFHK.[C]	NTkAFVSTSFHK	[K3](Biotin)	531.601	3	1328	1	ATDDRNTkAFVSTSF	568910764	0	0	0	1	0	0	0	1	0	0	0	114728	1328; 1337; 1352; 1382; 1745; 1771; 2078; 2267; 2307	18	9
Ahctf1	226747	568910764	XP_006496863.1	protein ELYS isoform X1 [Mus musculus]	128	1	[R].NVSTLEKSVLVPNKEAALVVTSK.[R]	NVSTLEkSVLVPNKEAALVVTSK	[K7](Biotin)	884.828	3	2078	2	RNVSTLEkSVLVPNK	568910764	0	0	1	1	0	0	1	1	0	0	341951	294286	1328; 1337; 1352; 1382; 1745; 1771; 2078; 2267; 2307	18	9
Ahctf1	226747	568910764	XP_006496863.1	protein ELYS isoform X1 [Mus musculus]	128	1	[K].AFVSTSFHKCGLPAETEWMK.[T]	AFVSTSFHkCGLPAETEWMK	[K9](Biotin)	856.73	3	1337	1	FVSTSFHkCGLPAET	568910764	0	0	1	1	0	0	2	1	0	0	2.4541e+06	1.86108e+06	1328; 1337; 1352; 1382; 1745; 1771; 2078; 2267; 2307	18	9
Ahctf1	226747	568910764	XP_006496863.1	protein ELYS isoform X1 [Mus musculus]	128	1	[R].ATDDRNTKAFVSTSFHK.[C]	ATDDRNTkAFVSTSFHK	[K8](Biotin)	717.683	3	1328	2	ATDDRNTkAFVSTSF	568910764	0	0	1	1	0	0	1	1	0	0	570367	537927	1328; 1337; 1352; 1382; 1745; 1771; 2078; 2267; 2307	18	9
Ahctf1	226747	568910764	XP_006496863.1	protein ELYS isoform X1 [Mus musculus]	128	1	[K].TSDKNTYFPLDVPAKGPQK.[V]	TSDKNTYFPLDVPAKGPQK	[K](Biotin)			X	2
Ahctf1	226747	568910764	XP_006496863.1	protein ELYS isoform X1 [Mus musculus]	128	1	[K].AFVSTSFHKCGLPAETEWMK.[T]	AFVSTSFHkCGLPAETEWMK	[K9](Biotin)	856.73	3	1337	1	FVSTSFHkCGLPAET	568910764	0	0	1	1	0	0	2	1	0	0	2.4541e+06	1.86108e+06	1328; 1337; 1352; 1382; 1745; 1771; 2078; 2267; 2307	18	9
Ahctf1	226747	568910764	XP_006496863.1	protein ELYS isoform X1 [Mus musculus]	128	1	[K].LTLNLKEDEIEAHVPKENVGLPEESPR.[I]	LTLNLKEDEIEAHVPKENVGLPEESPR	[K](Biotin)			X	2
Ahctf1	226747	568910764	XP_006496863.1	protein ELYS isoform X1 [Mus musculus]	128	1	[R].SLGQKLTLNLKEDEIEAHVPKENVGLPEESPR.[I]	SLGQKLTLNLKEDEIEAHVPKENVGLPEESPR	[K](Biotin)			X	3
Ahctf1	226747	568910764	XP_006496863.1	protein ELYS isoform X1 [Mus musculus]	128	1	[R].KKPSSFPKQILR.[R]	KKPSSFPkQILR	[K8](Biotin)	552.318	3	2307	2	KKPSSFPkQILRRKM	568910764	0	0	0	1	0	0	0	1	0	0	0	394934	1328; 1337; 1352; 1382; 1745; 1771; 2078; 2267; 2307	18	9
Ahctf1	226747	568910764	XP_006496863.1	protein ELYS isoform X1 [Mus musculus]	128	1	[R].SKEATPVAAGEAGDEDGAVIVSKAAHSSR.[L]	SKEATPVAAGEAGDEDGAVIVSkAAHSSR	[K23](Biotin)	759.873	4	1771	2	DGAVIVSkAAHSSRL	568910764	0	0	1	1	0	0	1	1	0	0	2.21608e+06	1664941	1328; 1337; 1352; 1382; 1745; 1771; 2078; 2267; 2307	18	9
Ahctf1	226747	568910764	XP_006496863.1	protein ELYS isoform X1 [Mus musculus]	128	1	[K].VAIAENLLDVIKDTR.[S]	VAIAENLLDVIkDTR	[K12](Biotin)	632.68	3	1745	1	ENLLDVIkDTRSKEA	568910764	0	0	1	0	0	0	1	0	0	0	127962	0	1328; 1337; 1352; 1382; 1745; 1771; 2078; 2267; 2307	18	9
Ahctf1	226747	568910764	XP_006496863.1	protein ELYS isoform X1 [Mus musculus]	128	1	[K].CGLPAETEWMKTSDKNTYFPLDVPAKGPQK.[V]	CGLPAETEWMKTSDKNTYFPLDVPAKGPQK	[K](Biotin)			X	3
Ahctf1	226747	568910764	XP_006496863.1	protein ELYS isoform X1 [Mus musculus]	128	1	[K].GSSWSPPPVEIKLVSPLASPVDEIK.[T]	GSSWSPPPVEIkLVSPLASPVDEIK	[K12](Biotin)	953.506	3	2267	1	SPPPVEIkLVSPLAS	568910764	0	0	1	0	0	0	1	0	0	0	0	0	1328; 1337; 1352; 1382; 1745; 1771; 2078; 2267; 2307	18	9
Cdc23	52563	30387632	NP_848124.1	cell division cycle protein 23 homolog [Mus musculus]	40	1	[R].YLAQYYFKCK.[L]	YLAQYYFkCK	[K8](Biotin)	805.383	2	522	1	YLAQYYFkCKLWDEA	30387632	0	1	0	0	0	1	0	0	0	30824.6	0	0				522
Myo1c	17913	568972076	XP_006532492.1	unconventional myosin-Ic isoform X1 [Mus musculus]	67	1	[K].LADQKTR.[K]	LADQkTR	[K5](Biotin)	529.277	2	532	1	THKLADQkTRKSLDR	568972076	1	1	0	0	1	1	0	0	461430	46017.1	0	0				532
Pcx	18563	251823980	NP_001156418.1	pyruvate carboxylase, mitochondrial isoform 1 [Mus musculus]	58	1	[K].GQPLCVLSAMKMETVVTSPMEGTIR.[K]	GQPLCVLSAMkMETVVTSPMEGTIR	[K11](Biotin)	1481.22	2	1145	1	LCVLSAMkMETVVTS	251823980	1	1	1	1	10	1	15	3	1.47184e+07	496516	2.12699e+07	3.42795e+06	1145	37	1	1145
Pcx	18563	251823980	NP_001156418.1	pyruvate carboxylase, mitochondrial isoform 1 [Mus musculus]	58	1	[K].GQPLCVLSAMKMETVVTSPMEGTIR.[K]	GQPLCVLSAMkMETVVTSPMEGTIR	[K11](Biotin)	1481.22	2	1145	1	LCVLSAMkMETVVTS	251823980	1	1	1	1	10	1	15	3	1.47184e+07	496516	2.12699e+07	3.42795e+06	1145	37	1	1145
Pcx	18563	251823980	NP_001156418.1	pyruvate carboxylase, mitochondrial isoform 1 [Mus musculus]	58	1	[K].GQPLCVLSAMKMETVVTSPMEGTIRK.[V]	GQPLCVLSAMkMETVVTSPMEGTIRK	[K11](Biotin)	1030.51	3	1145	2	LCVLSAMkMETVVTS	251823980	0	0	1	0	0	0	1	0	0	0	0	0	1145	37	1	1145
Srsf11	69207	568923916	XP_006502078.1	serine/arginine-rich splicing factor 11 isoform X1 [Mus musculus]	50	1	[K].LMSTVDPKLNHVAAGLVSPSLK.[S]	LMSTVDPkLNHVAAGLVSPSLK	[K8](Biotin)	835.12	3	225	1	LMSTVDPkLNHVAAG	568923916	0	1	0	0	0	1	0	0	0	36616.3	0	0				225
Med1	19014	121582398	NP_001073587.1	mediator of RNA polymerase II transcription subunit 1 isoform 3 [Mus musculus]	124	1	[K].GTVMVGKPSSHSQYTSSGSVSSSGSK.[S]	GTVMVGkPSSHSQYTSSGSVSSSGSK	[K7](Biotin)	919.095	3	1076	0	KGTVMVGkPSSHSQY	121582398	1	0	0	0	1	0	0	0	152369	0	0	0				1076; 1393
Med1	19014	121582398	NP_001073587.1	mediator of RNA polymerase II transcription subunit 1 isoform 3 [Mus musculus]	124	1	[K].NVGSTGVAKIIISK.[H]	NVGSTGVAkIIISK	[K9](Biotin)	806.961	2	1393	1	VGSTGVAkIIISKHD	121582398	1	0	0	0	1	0	0	0	192943	0	0	0				1076; 1393
Flna	192176	569009889	XP_006527974.1	filamin-A isoform X2 [Mus musculus]	160	1	[K].GKLDVQFSGLAKGDAVR.[D]	GKLDVQFSGLAkGDAVR	[K12](Biotin)	663.017	3	916	2	VQFSGLAkGDAVRDV	569009889	1	0	0	0	1	0	0	0	415615	0	0	0				916
Vrk2	69922	568970467	XP_006514864.1	serine/threonine-protein kinase VRK2 isoform X1 [Mus musculus]	40	1	[K].ILNPDGVPLGPLEFSTKVQSVHVR.[T]	ILNPDGVPLGPLEFSTkVQSVHVR	[K17](Biotin)	943.513	3	328	1	GPLEFSTkVQSVHVR	568970467	0	0	1	0	0	0	2	0	0	0	285567	0	328; 341; 346; 358	6	4
Vrk2	69922	568970467	XP_006514864.1	serine/threonine-protein kinase VRK2 isoform X1 [Mus musculus]	40	1	[R].KPANEFPAKFPK.[K]	KPANEFPAkFPK	[K9](Biotin)	533.951	3	358	1	PANEFPAkFPKKVHR	568970467	0	0	1	1	0	0	1	1	0	0	266031	212309	328; 341; 346; 358	6	4
Vrk2	69922	568970467	XP_006514864.1	serine/threonine-protein kinase VRK2 isoform X1 [Mus musculus]	40	1	[R].TPAQQKVDSPK.[A]	TPAQQkVDSPK	[K6](Biotin)	712.865	2	341	1	VRTPAQQkVDSPKAT	568970467	0	0	1	0	0	0	1	0	0	0	229201	0	328; 341; 346; 358	6	4
Vrk2	69922	568970467	XP_006514864.1	serine/threonine-protein kinase VRK2 isoform X1 [Mus musculus]	40	1	[R].TPAQQKVDSPKATR.[K]	TPAQQKVDSPkATR	[K11](Biotin)	584.974	3	346	2	QQKVDSPkATRKPAN	568970467	0	0	1	0	0	0	1	0	0	0	57823.4	0	328; 341; 346; 358	6	4
Arid2	77044	262231796	NP_780460.3	AT-rich interactive domain-containing protein 2 [Mus musculus]	78	1	[K].TVKRPAEDNDRDTVPGIPNKVGVR.[I]	TVKRPAEDNDRDTVPGIPNkVGVR	[K20](Biotin)	715.628	4	1527	3	TVPGIPNkVGVRIVT	262231796	1	1	0	0	1	2	0	0	830196	190307	0	0				706; 1527
Arid2	77044	262231796	NP_780460.3	AT-rich interactive domain-containing protein 2 [Mus musculus]	78	1	[K].RPAEDNDRDTVPGIPNKVGVR.[I]	RPAEDNDRDTVPGIPNkVGVR	[K17](Biotin)	633.576	4	1527	2	TVPGIPNkVGVRIVT	262231796	1	1	0	0	1	2	0	0	2.34969e+06	468400	0	0				706; 1527
Arid2	77044	262231796	NP_780460.3	AT-rich interactive domain-containing protein 2 [Mus musculus]	78	1	[R].IPPNPSVHTHQQQNSPVTVIQNKAPIPCEVVK.[A]	IPPNPSVHTHQQQNSPVTVIQNkAPIPCEVVK	[K23](Biotin)	946.495	4	706	1	PVTVIQNkAPIPCEV	262231796	1	0	0	0	1	0	0	0	0	0	0	0				706; 1527
Utrn	22288	568965341	XP_006512769.1	utrophin isoform X2 [Mus musculus]	248	1	[R].MAAHPNVQKVVLVSSASDAPLR.[G]	MAAHPNVQkVVLVSSASDAPLR	[K9](Biotin)	839.444	3	2210	1	AAHPNVQkVVLVSSA	568965341	1	0	0	0	1	0	0	0	0	0	0	0				2210
Cald1	109624	568940266	XP_006505411.1	caldesmon isoform X4 [Mus musculus]	89	2	[K].GSSLKIEERAEFLNK.[S]	GSSLkIEERAEFLNK	[K5](Biotin)	649.672	3	625	2	TPKGSSLkIEERAEF	568940266	1	0	0	0	1	0	0	0	350901	0	0	0	439; 620; 625; 692; 737	8	5	119; 439; 483; 615; 620; 625; 653; 692; 697; 731; 737
Cald1	109624	568940266	XP_006505411.1	caldesmon isoform X4 [Mus musculus]	89	2	[R].INEWLTKSPDGNKSPAPKPSDLRPGDVSGKR.[N]	INEWLTkSPDGNKSPAPKPSDLRPGDVSGKR	[K7](Biotin)	715.373	5	731	3	RINEWLTkSPDGNKS	568940266	1	0	0	0	1	0	0	0	220797	0	0	0	439; 620; 625; 692; 737	8	5	119; 439; 483; 615; 620; 625; 653; 692; 697; 731; 737
Cald1	109624	568940266	XP_006505411.1	caldesmon isoform X4 [Mus musculus]	89	2	[K].CFTPKGSSLKIEER.[A]	CFTPkGSSLKIEER	[K5](Biotin)	626.648	3	620	2	PFKCFTPkGSSLKIE	568940266	1	1	1	0	1	1	1	0	433054	35457.4	178083	0	439; 620; 625; 692; 737	8	5	119; 439; 483; 615; 620; 625; 653; 692; 697; 731; 737
Cald1	109624	568940266	XP_006505411.1	caldesmon isoform X4 [Mus musculus]	89	2	[K].SPDGNKSPAPKPSDLRPGDVSGKR.[N]	SPDGNkSPAPKPSDLRPGDVSGKR	[K6](Biotin)	672.845	4	737	2	TKSPDGNkSPAPKPS	568940266	1	1	1	1	1	1	1	1	212453	33051.9	115977	115777	439; 620; 625; 692; 737	8	5	119; 439; 483; 615; 620; 625; 653; 692; 697; 731; 737
Cald1	109624	568940266	XP_006505411.1	caldesmon isoform X4 [Mus musculus]	89	2	[R].STHQAAVVSKIDSR.[L]	STHQAAVVSkIDSR	[K10](Biotin)	575.63	3	653	1	HQAAVVSkIDSRLEQ	568940266	1	1	0	0	2	1	0	0	2.44057e+06	223938	0	0	439; 620; 625; 692; 737	8	5	119; 439; 483; 615; 620; 625; 653; 692; 697; 731; 737
Cald1	109624	568940266	XP_006505411.1	caldesmon isoform X4 [Mus musculus]	89	2	[R].NIKSMWEK.[G]	NIkSMWEK	[K3](Biotin)	631.307	2	692	1	AEGVRNIkSMWEKGS	568940266	1	1	1	1	1	2	1	1	2.53318e+06	375319	1.44255e+06	728715	439; 620; 625; 692; 737	8	5	119; 439; 483; 615; 620; 625; 653; 692; 697; 731; 737
Cald1	109624	568940266	XP_006505411.1	caldesmon isoform X4 [Mus musculus]	89	2	[K].GSSLKIEER.[A]	GSSLkIEER	[K5](Biotin)	622.82	2	625	1	TPKGSSLkIEERAEF	568940266	1	1	0	1	1	1	0	1	15838522	1.32883e+06	0	3.40483e+06	439; 620; 625; 692; 737	8	5	119; 439; 483; 615; 620; 625; 653; 692; 697; 731; 737
Cald1	109624	568940266	XP_006505411.1	caldesmon isoform X4 [Mus musculus]	89	2	[R].QKMPEDGLSEDKKPFKCFTPK.[G]	QKMPEDGLSEDKKPFkCFTPK	[K16](Biotin)	684.836	4	615	3	SEDKKPFkCFTPKGS	568940266	1	0	0	0	1	0	0	0	520133	0	0	0	439; 620; 625; 692; 737	8	5	119; 439; 483; 615; 620; 625; 653; 692; 697; 731; 737
Cald1	109624	568940266	XP_006505411.1	caldesmon isoform X4 [Mus musculus]	89	2	[R].QKEFDPTITDGSLSGPSRR.[M]	QkEFDPTITDGSLSGPSRR	[K2](Biotin)	773.046	3	119	2	QEALERQkEFDPTIT	568940266	1	1	0	0	1	1	0	0	901072	73207.7	0	0	439; 620; 625; 692; 737	8	5	119; 439; 483; 615; 620; 625; 653; 692; 697; 731; 737
Cald1	109624	568940266	XP_006505411.1	caldesmon isoform X4 [Mus musculus]	89	2	[K].AQNGEFMTHKLK.[Q]	AQNGEFMTHKLK	[K](Biotin)			X	1
Cald1	109624	568940266	XP_006505411.1	caldesmon isoform X4 [Mus musculus]	89	1	[R].KEEIKDEK.[I]	kEEIKDEK	[K1](Biotin)	622.814	2	439	2	DDKPAFRkEEIKDEK	568940266	1	0	1	1	2	0	1	1	2.08583e+06	0	565087	405668	439; 620; 625; 692; 737	8	5	119; 439; 483; 615; 620; 625; 653; 692; 697; 731; 737
Cald1	109624	568940266	XP_006505411.1	caldesmon isoform X4 [Mus musculus]	89	2	[K].SMWEKGSVFSAPSASGTPNKETAGLK.[V]	SMWEkGSVFSAPSASGTPNKETAGLK	[K5](Biotin)	965.134	3	697	2	NIKSMWEkGSVFSAP	568940266	1	0	0	0	1	0	0	0	440027	0	0	0	439; 620; 625; 692; 737	8	5	119; 439; 483; 615; 620; 625; 653; 692; 697; 731; 737
Cald1	109624	568940266	XP_006505411.1	caldesmon isoform X4 [Mus musculus]	89	2	[K].LKQTENAFSPSR.[S]	LkQTENAFSPSR	[K2](Biotin)	802.401	2	483	1	EFMTHKLkQTENAFS	568940266	1	1	0	0	1	1	0	0	347249	24550	0	0	439; 620; 625; 692; 737	8	5	119; 439; 483; 615; 620; 625; 653; 692; 697; 731; 737
Xab2	67439	13385660	NP_080432.1	pre-mRNA-splicing factor SYF1 [Mus musculus]	43	1	[R].AQSKIFFVR.[S]	AQSkIFFVR	[K4](Biotin)	661.359	2	794	1	QPPRAQSkIFFVRSD	13385660	1	1	0	0	1	2	0	0	1.07667e+06	198388	0	0				794
Top2b	21974	34328148	NP_033435.2	DNA topoisomerase 2-beta [Mus musculus]	187	1	[K].QTDKLPSKTVAAK.[K]	QTDKLPSkTVAAK	[K8](Biotin)	538.296	3	1477	2	QTDKLPSkTVAAKKG	34328148	1	0	0	0	1	0	0	0	205339	0	0	0				1477
Dbn1	56320	293651558	NP_001170843.1	drebrin isoform 2 [Mus musculus]	23	1	[K].VPPPVFYNKPPEIDITCWDADPVPEEEEGFEGGD.[-]	VPPPVFYNkPPEIDITCWDADPVPEEEEGFEGGD	[K9](Biotin)	1018.46	4	636	0	PPPVFYNkPPEIDIT	293651558	1	0	0	0	2	0	0	0	0	0	0	0				636
Larp1	73158	226442901	NP_082727.1	la-related protein 1 [Mus musculus]	83	1	[K].HAPPPAAVNGQPPPEPSAPAKVVR.[A]	HAPPPAAVNGQPPPEPSAPAkVVR	[K21](Biotin)	870.792	3	125	1	PEPSAPAkVVRAAAP	226442901	1	0	0	0	1	0	0	0	307489	0	0	0				125
Hspa8	15481	31981690	NP_112442.2	heat shock cognate 71 kDa protein [Mus musculus]	54	1	[K].ITITNDKGR.[L]	ITITNDkGR	[K7](Biotin)	622.327	2	507	1	KITITNDkGRLSKED	31981690	0	1	0	0	0	2	0	0	0	114401	0	0				507
Cherp	27967	119672912	NP_613051.3	calcium homeostasis endoplasmic reticulum protein [Mus musculus]	40	1	[R].MKARDEFSTFGTR.[K]	MkARDEFSTFGTR	[K2](Biotin)	591.28	3	921	2	YSFIARMkARDEFST	119672912	1	0	0	0	1	0	0	0	453943	0	0	0				890; 921
Cherp	27967	119672912	NP_613051.3	calcium homeostasis endoplasmic reticulum protein [Mus musculus]	40	1	[R].DKWDQYKGVGVALDDPYENYRR.[N]	DkWDQYKGVGVALDDPYENYRR	[K2](Biotin)	729.098	4	890	3	KGGDVRDkWDQYKGV	119672912	1	0	0	0	1	0	0	0	73042.5	0	0	0				890; 921
Tjp1	21872	568947647	XP_006540841.1	tight junction protein ZO-1 isoform X1 [Mus musculus]	118	1	[R].KQLSYFDRR.[S]	kQLSYFDRR	[K1](Biotin)	480.247	3	1449	2	EDEEYYRkQLSYFDR	568947647	1	1	0	0	1	1	0	0	628486	57768.2	0	0				1449
Rlf	109263	568928201	XP_006502719.1	zinc finger protein Rlf isoform X1 [Mus musculus]	146	1	[R].HKDYYDNLFSSQKVANER.[L]	HKDYYDNLFSSQkVANER	[K13](Biotin)	610.79	4	1474	2	DNLFSSQkVANERLL	568928201	1	1	0	0	1	1	0	0	311407	88114.8	0	0				1474
Senp1	223870	568992265	XP_006520943.1	sentrin-specific protease 1 isoform X1 [Mus musculus]	46	1	[R].KTSSGLSNTFVGKSNHHCHMSAYEK.[S]	KTSSGLSNTFVGkSNHHCHMSAYEK	[K13](Biotin)	759.101	4	168	2	LSNTFVGkSNHHCHM	568992265	0	0	1	1	0	0	1	2	0	0	142507	440320	168	3	1
Tcf20	21411	166706891	NP_001107612.1	transcription factor 20 isoform a [Mus musculus]	119	1	[K].SSSTAPEMKQINLSDYPIPR.[K]	SSSTAPEMkQINLSDYPIPR	[K9](Biotin)	820.735	3	861	1	SSTAPEMkQINLSDY	166706891	1	1	0	0	1	1	0	0	259508	38239.3	0	0				861
Ndc1	72787	28077005	NP_082631.1	nucleoporin NDC1 [Mus musculus]	25	1	[K].KLSSAEETAFQTPKPSQTPSVPPLVKTSLFSPK.[L]	KLSSAEETAFQTPKPSQTPSVPPLVkTSLFSPK	[K26](Biotin)	939.254	4	429	2	PSVPPLVkTSLFSPK	28077005	0	0	1	1	0	0	1	1	0	0	1.49923e+06	602947	429; 436	6	2
Ndc1	72787	28077005	NP_082631.1	nucleoporin NDC1 [Mus musculus]	25	1	[K].TSLFSPKLSTPNVSSPFGTPFGSSVVNR.[M]	TSLFSPkLSTPNVSSPFGTPFGSSVVNR	[K7](Biotin)	1046.2	3	436	1	KTSLFSPkLSTPNVS	28077005	0	0	1	1	0	0	2	2	0	0	2.00726e+06	3.6556e+06	429; 436	6	2
Cald1	109624	21704156	NP_663550.1	caldesmon [Mus musculus]	62	2	[K].GSSLKIEERAEFLNK.[S]	GSSLkIEERAEFLNK	[K5](Biotin)	649.672	3	383	2	TPKGSSLkIEERAEF	21704156	1	0	0	0	1	0	0	0	350901	0	0	0	378; 383; 450; 495	6	4	113; 241; 373; 378; 383; 411; 450; 455; 489; 495; 529
Cald1	109624	21704156	NP_663550.1	caldesmon [Mus musculus]	62	2	[R].INEWLTKSPDGNKSPAPKPSDLRPGDVSGKR.[N]	INEWLTkSPDGNKSPAPKPSDLRPGDVSGKR	[K7](Biotin)	715.373	5	489	3	RINEWLTkSPDGNKS	21704156	1	0	0	0	1	0	0	0	220797	0	0	0	378; 383; 450; 495	6	4	113; 241; 373; 378; 383; 411; 450; 455; 489; 495; 529
Cald1	109624	21704156	NP_663550.1	caldesmon [Mus musculus]	62	2	[K].CFTPKGSSLKIEER.[A]	CFTPkGSSLKIEER	[K5](Biotin)	626.648	3	378	2	PFKCFTPkGSSLKIE	21704156	1	1	1	0	1	1	1	0	433054	35457.4	178083	0	378; 383; 450; 495	6	4	113; 241; 373; 378; 383; 411; 450; 455; 489; 495; 529
Cald1	109624	21704156	NP_663550.1	caldesmon [Mus musculus]	62	2	[K].SPDGNKSPAPKPSDLRPGDVSGKR.[N]	SPDGNkSPAPKPSDLRPGDVSGKR	[K6](Biotin)	672.845	4	495	2	TKSPDGNkSPAPKPS	21704156	1	1	1	1	1	1	1	1	212453	33051.9	115977	115777	378; 383; 450; 495	6	4	113; 241; 373; 378; 383; 411; 450; 455; 489; 495; 529
Cald1	109624	21704156	NP_663550.1	caldesmon [Mus musculus]	62	2	[R].STHQAAVVSKIDSR.[L]	STHQAAVVSkIDSR	[K10](Biotin)	575.63	3	411	1	HQAAVVSkIDSRLEQ	21704156	1	1	0	0	2	1	0	0	2.44057e+06	223938	0	0	378; 383; 450; 495	6	4	113; 241; 373; 378; 383; 411; 450; 455; 489; 495; 529
Cald1	109624	21704156	NP_663550.1	caldesmon [Mus musculus]	62	2	[R].NIKSMWEK.[G]	NIkSMWEK	[K3](Biotin)	631.307	2	450	1	AEGVRNIkSMWEKGS	21704156	1	1	1	1	1	2	1	1	2.53318e+06	375319	1.44255e+06	728715	378; 383; 450; 495	6	4	113; 241; 373; 378; 383; 411; 450; 455; 489; 495; 529
Cald1	109624	21704156	NP_663550.1	caldesmon [Mus musculus]	62	2	[K].GSSLKIEER.[A]	GSSLkIEER	[K5](Biotin)	622.82	2	383	1	TPKGSSLkIEERAEF	21704156	1	1	0	1	1	1	0	1	15838522	1.32883e+06	0	3.40483e+06	378; 383; 450; 495	6	4	113; 241; 373; 378; 383; 411; 450; 455; 489; 495; 529
Cald1	109624	21704156	NP_663550.1	caldesmon [Mus musculus]	62	2	[R].QKMPEDGLSEDKKPFKCFTPK.[G]	QKMPEDGLSEDKKPFkCFTPK	[K16](Biotin)	684.836	4	373	3	SEDKKPFkCFTPKGS	21704156	1	0	0	0	1	0	0	0	520133	0	0	0	378; 383; 450; 495	6	4	113; 241; 373; 378; 383; 411; 450; 455; 489; 495; 529
Cald1	109624	21704156	NP_663550.1	caldesmon [Mus musculus]	62	2	[R].QKEFDPTITDGSLSGPSRR.[M]	QkEFDPTITDGSLSGPSRR	[K2](Biotin)	773.046	3	113	2	QEALERQkEFDPTIT	21704156	1	1	0	0	1	1	0	0	901072	73207.7	0	0	378; 383; 450; 495	6	4	113; 241; 373; 378; 383; 411; 450; 455; 489; 495; 529
Cald1	109624	21704156	NP_663550.1	caldesmon [Mus musculus]	62	2	[K].AQNGEFMTHKLK.[Q]	AQNGEFMTHKLK	[K](Biotin)			X	1
Cald1	109624	21704156	NP_663550.1	caldesmon [Mus musculus]	62	2	[K].SMWEKGSVFSAPSASGTPNKETAGLK.[V]	SMWEkGSVFSAPSASGTPNKETAGLK	[K5](Biotin)	965.134	3	455	2	NIKSMWEkGSVFSAP	21704156	1	0	0	0	1	0	0	0	440027	0	0	0	378; 383; 450; 495	6	4	113; 241; 373; 378; 383; 411; 450; 455; 489; 495; 529
Cald1	109624	21704156	NP_663550.1	caldesmon [Mus musculus]	62	2	[K].LKQTENAFSPSR.[S]	LkQTENAFSPSR	[K2](Biotin)	802.401	2	241	1	EFMTHKLkQTENAFS	21704156	1	1	0	0	1	1	0	0	347249	24550	0	0	378; 383; 450; 495	6	4	113; 241; 373; 378; 383; 411; 450; 455; 489; 495; 529
Cald1	109624	21704156	NP_663550.1	caldesmon [Mus musculus]	62	1	[K].QSVDKVTSPTKV.[-]	QSVDKVTSPTkV	[K11](Biotin)	757.899	2	529	2	DKVTSPTkV	21704156	1	0	0	0	1	0	0	0	355628	0	0	0	378; 383; 450; 495	6	4	113; 241; 373; 378; 383; 411; 450; 455; 489; 495; 529
Nup214	227720	568913494	XP_006498008.1	nuclear pore complex protein Nup214 isoform X1 [Mus musculus]	89	1	[K].VIPQGADSTMLATKTVK.[H]	VIPQGADSTMLATkTVK	[K14](Biotin)	662.685	3	1079	1	DSTMLATkTVKHGAP	568913494	0	0	1	1	0	0	1	1	0	0	781709	713220	1079; 1155	4	2	1155
Nup214	227720	568913494	XP_006498008.1	nuclear pore complex protein Nup214 isoform X1 [Mus musculus]	89	1	[R].SNPSPPSAAMGSAVQHSAAKTPHAVLTPVANSQAK.[Q]	SNPSPPSAAMGSAVQHSAAkTPHAVLTPVANSQAK	[K20](Biotin)	909.709	4	1155	1	AVQHSAAkTPHAVLT	568913494	0	1	1	1	0	1	1	1	0	81101.8	1.74093e+06	1.17198e+06	1079; 1155	4	2	1155
Epb4.1l2	13822	568964823	XP_006512572.1	band 4.1-like protein 2 isoform X1 [Mus musculus]	81	2	[K].TVKGGISETR.[I]	TVkGGISETR	[K3](Biotin)	637.332	2	1003	1	THITKTVkGGISETR	568964823	1	0	0	0	1	0	0	0	0	0	0	0				1003
Emd	13726	6679641	NP_031953.1	emerin [Mus musculus]	10	1	[K].KEDALLYQSKDYNDDYYEESYLTTK.[T]	KEDALLYQSkDYNDDYYEESYLTTK	[K10](Biotin)	1107.5	3	89	2	DALLYQSkDYNDDYY	6679641	0	0	1	0	0	0	1	0	0	0	319329	0	89; 104; 116	4	3
Emd	13726	6679641	NP_031953.1	emerin [Mus musculus]	10	1	[K].TYGEPESVGMSKSFRQPGTSLVDADTFHHQVR.[D]	TYGEPESVGMSkSFRQPGTSLVDADTFHHQVR	[K12](Biotin)	758.763	5	116	2	PESVGMSkSFRQPGT	6679641	0	0	1	0	0	0	1	0	0	0	803016	0	89; 104; 116	4	3
Emd	13726	6679641	NP_031953.1	emerin [Mus musculus]	10	1	[K].DYNDDYYEESYLTTKTYGEPESVGMSK.[S]	DYNDDYYEESYLTTkTYGEPESVGMSK	[K15](Biotin)	853.361	4	104	1	EESYLTTkTYGEPES	6679641	0	0	1	0	0	0	2	0	0	0	1.11145e+06	0	89; 104; 116	4	3
Emd	13726	6679641	NP_031953.1	emerin [Mus musculus]	10	4	[R].KLYEKK.[IL]	KLYEKK	[K](Biotin)			X	2
Incenp	16319	755562819	XP_006526770.2	inner centromere protein isoform X1 [Mus musculus]	85	1	[R].VLSPILLNNILPTTAKSPLGNIR.[S]	VLSPILLNNILPTTAkSPLGNIR	[K16](Biotin)	890.852	3	279	1	NILPTTAkSPLGNIR	755562819	1	0	1	0	1	0	1	0	0	0	0	0	279; 304	2	2	279
Incenp	16319	755562819	XP_006526770.2	inner centromere protein isoform X1 [Mus musculus]	85	1	[R].SLISQDSQVPLASKYNLVAK.[Q]	SLISQDSQVPLASkYNLVAK	[K14](Biotin)	796.424	3	304	1	SQVPLASkYNLVAKQ	755562819	0	0	1	0	0	0	1	0	0	0	42070.7	0	279; 304	2	2	279
Nup153	218210	254588102	NP_786925.2	nuclear pore complex protein Nup153 [Mus musculus]	96	1	[R].LMTPKPVSIATNR.[T]	LMTPkPVSIATNR	[K5](Biotin)	551.965	3	372	0	VQRLMTPkPVSIATN	254588102	0	0	1	0	0	0	1	0	0	0	297443	0	264; 372; 385; 597; 609	10	5	597
Nup153	218210	254588102	NP_786925.2	nuclear pore complex protein Nup153 [Mus musculus]	96	1	[R].TVYFKPSLTPSGDLR.[K]	TVYFkPSLTPSGDLR	[K5](Biotin)	636.33	3	385	0	TNRTVYFkPSLTPSG	254588102	0	0	0	1	0	0	0	1	0	0	0	88281.5	264; 372; 385; 597; 609	10	5	597
Nup153	218210	254588102	NP_786925.2	nuclear pore complex protein Nup153 [Mus musculus]	96	1	[R].TVYFKPSLTPSGDLRK.[T]	TVYFkPSLTPSGDLRK	[K5](Biotin)	679.029	3	385	1	TNRTVYFkPSLTPSG	254588102	0	0	0	1	0	0	0	1	0	0	0	121076	264; 372; 385; 597; 609	10	5	597
Nup153	218210	254588102	NP_786925.2	nuclear pore complex protein Nup153 [Mus musculus]	96	1	[K].TSQLGDSPFYPGKTTYGGAAAAVR.[Q]	TSQLGDSPFYPGkTTYGGAAAAVR	[K13](Biotin)	881.097	3	264	1	DSPFYPGkTTYGGAA	254588102	0	0	1	0	0	0	1	0	0	0	325513	0	264; 372; 385; 597; 609	10	5	597
Nup153	218210	254588102	NP_786925.2	nuclear pore complex protein Nup153 [Mus musculus]	96	1	[R].EGSVLDILKTPGFASPK.[V]	EGSVLDILkTPGFASPK	[K9](Biotin)	662.352	3	609	1	GSVLDILkTPGFASP	254588102	0	0	1	1	0	0	1	1	0	0	315323	787916	264; 372; 385; 597; 609	10	5	597
Nup153	218210	254588102	NP_786925.2	nuclear pore complex protein Nup153 [Mus musculus]	96	1	[R].SAPCEDPFTPAKILR.[E]	SAPCEDPFTPAkILR	[K12](Biotin)	643.319	3	597	1	EDPFTPAkILREGSV	254588102	1	1	1	1	1	1	2	2	325366	40906	1.56076e+06	1.45502e+06	264; 372; 385; 597; 609	10	5	597
Nup88	19069	134053894	NP_001076800.1	nuclear pore complex protein Nup88 isoform 2 [Mus musculus]	45	1	[K].VIVLSEAEEESLILNKGR.[A]	VIVLSEAEEESLILNkGR	[K16](Biotin)	742.401	3	228	1	EESLILNkGRAYTAS	134053894	1	0	1	0	1	0	1	0	127193	0	379454	0	228	1	1	228
Mfap1b	100034361	126517472	NP_001075444.1	microfibrillar-associated protein 1 [Mus musculus]	44	1	[K].TILPKVMQVK.[N]	TILPkVMQVK	[K5](Biotin)	691.9	2	376	1	FNKTILPkVMQVKNF	126517472	1	0	0	0	1	0	0	0	893158	0	0	0				376
Fmr1	14265	51036613	NP_032057.2	fragile X mental retardation protein 1 homolog isoform 1 [Mus musculus]	41	1	[K].ENTHFSQPNSTKVQR.[VG]	ENTHFSQPNSTkVQR	[K12](Biotin)	666.986	3	371	1	FSQPNSTkVQRVLVV	51036613	1	0	0	0	1	0	0	0	423901	0	0	0				371
Sun1	77053	568938833	XP_006504821.1	SUN domain-containing protein 1 isoform X2 [Mus musculus]	43	1	[R].EQTKVDHFWGLDDDGDLKGGNK.[A]	EQTkVDHFWGLDDDGDLKGGNK	[K4](Biotin)	675.815	4	175	2	SLIREQTkVDHFWGL	568938833	0	0	1	1	0	0	1	2	0	0	2.87919e+06	3.37346e+06	129; 140; 175; 308	21	4
Sun1	77053	568938833	XP_006504821.1	SUN domain-containing protein 1 isoform X2 [Mus musculus]	43	1	[R].HPVLDESLIREQTKVDHFWGLDDDGDLKGGNK.[A]	HPVLDESLIREQTkVDHFWGLDDDGDLKGGNK	[K14](Biotin)	772.777	5	175	3	SLIREQTkVDHFWGL	568938833	0	0	1	0	0	0	1	0	0	0	334660	0	129; 140; 175; 308	21	4
Sun1	77053	568938833	XP_006504821.1	SUN domain-containing protein 1 isoform X2 [Mus musculus]	43	1	[R].RSASKPAFSINHLSGKGLSSSTSHDSSCSLR.[S]	RSASKPAFSINHLSGkGLSSSTSHDSSCSLR	[K16](Biotin)	872.673	4	140	2	SINHLSGkGLSSSTS	568938833	0	0	1	1	0	0	2	2	0	0	1.51812e+06	1.03991e+06	129; 140; 175; 308	21	4
Sun1	77053	568938833	XP_006504821.1	SUN domain-containing protein 1 isoform X2 [Mus musculus]	43	1	[R].SASKPAFSINHLSGK.[G]	SASkPAFSINHLSGK	[K4](Biotin)	590.639	3	129	0	KQRRSASkPAFSINH	568938833	0	0	1	1	0	0	1	2	0	0	2.10833e+06	2049914	129; 140; 175; 308	21	4
Sun1	77053	568938833	XP_006504821.1	SUN domain-containing protein 1 isoform X2 [Mus musculus]	43	1	[R].SASKPAFSINHLSGKGLSSSTSHDSSCSLR.[S]	SASKPAFSINHLSGkGLSSSTSHDSSCSLR	[K15](Biotin)	667.122	5	140	1	SINHLSGkGLSSSTS	568938833	0	0	1	1	0	0	2	2	0	0	6.18852e+06	3.86792e+06	129; 140; 175; 308	21	4
Sun1	77053	568938833	XP_006504821.1	SUN domain-containing protein 1 isoform X2 [Mus musculus]	43	1	[R].AYESQSYETKSHESEAHLGHCGR.[M]	AYESQSYETkSHESEAHLGHCGR	[K10](Biotin)	723.061	4	308	1	ESQSYETkSHESEAH	568938833	0	0	1	1	0	0	2	1	0	0	245888	108112	129; 140; 175; 308	21	4
Sun1	77053	568938833	XP_006504821.1	SUN domain-containing protein 1 isoform X2 [Mus musculus]	43	1	[R].RSASKPAFSINHLSGK.[G]	RSASkPAFSINHLSGK	[K5](Biotin)	482.256	4	129	1	KQRRSASkPAFSINH	568938833	0	0	1	1	0	0	1	2	0	0	661361	415512	129; 140; 175; 308	21	4
Snrpd2	107686	58037145	NP_081219.1	small nuclear ribonucleoprotein Sm D2 [Mus musculus]	17	1	[R].GDSVIVVLRNPLIAGK.[-]	GDSVIVVLRNPLIAGk	[K16](Biotin)	626.361	3	118	1	RNPLIAGk	58037145	1	0	0	0	1	0	0	0	101458	0	0	0				118
Ddx46	212880	530585119	NP_001268984.1	probable ATP-dependent RNA helicase DDX46 [Mus musculus]	105	1	[K].TIAEQLAEKINAK.[L]	TIAEQLAEkINAK	[K9](Biotin)	552.3	3	904	1	IAEQLAEkINAKLNY	530585119	1	0	0	0	1	0	0	0	156065	0	0	0				263; 895; 904; 908
Ddx46	212880	530585119	NP_001268984.1	probable ATP-dependent RNA helicase DDX46 [Mus musculus]	105	1	[K].SGPTVTKVVTVVTTKK.[A]	SGPTVTkVVTVVTTKK	[K7](Biotin)	624.362	3	263	2	KSGPTVTkVVTVVTT	530585119	1	1	0	0	1	1	0	0	804479	53112.6	0	0				263; 895; 904; 908
Ddx46	212880	530585119	NP_001268984.1	probable ATP-dependent RNA helicase DDX46 [Mus musculus]	105	1	[K].INAKLNYVPLEKQEEERQEGGQSESFK.[R]	INAkLNYVPLEKQEEERQEGGQSESFK	[K4](Biotin)	844.919	4	908	3	LAEKINAkLNYVPLE	530585119	1	0	0	0	1	0	0	0	1.12671e+06	0	0	0				263; 895; 904; 908
Ddx46	212880	530585119	NP_001268984.1	probable ATP-dependent RNA helicase DDX46 [Mus musculus]	105	1	[R].GGTILAPTVSAKTIAEQLAEK.[I]	GGTILAPTVSAkTIAEQLAEK	[K12](Biotin)	775.421	3	895	1	LAPTVSAkTIAEQLA	530585119	1	0	0	0	1	0	0	0	87343.9	0	0	0				263; 895; 904; 908
Ddx46	212880	530585119	NP_001268984.1	probable ATP-dependent RNA helicase DDX46 [Mus musculus]	105	1	[R].GGTILAPTVSAKTIAEQLAEKINAK.[L]	GGTILAPTVSAkTIAEQLAEKINAK	[K12](Biotin)	917.511	3	895	2	LAPTVSAkTIAEQLA	530585119	1	0	0	0	1	0	0	0	269553	0	0	0				263; 895; 904; 908
Ddx46	212880	530585119	NP_001268984.1	probable ATP-dependent RNA helicase DDX46 [Mus musculus]	105	1	[K].KSGPTVTKVVTVVTTK.[K]	KSGPTVTkVVTVVTTK	[K8](Biotin)	624.361	3	263	2	KSGPTVTkVVTVVTT	530585119	1	0	0	0	1	0	0	0	217803	0	0	0				263; 895; 904; 908
Arid1b	239985	145553997	NP_001078824.1	AT-rich interactive domain-containing protein 1B [Mus musculus]	81	1	[K].SPFLPTMKMQK.[V]	SPFLPTMkMQK	[K8](Biotin)	767.386	2	1574	1	SPFLPTMkMQKVMPT	145553997	1	0	0	0	1	0	0	0	715308	0	0	0				1574
Lima1	65970	165905585	NP_001107017.1	LIM domain and actin-binding protein 1 isoform a [Mus musculus]	66	2	[K].MMFEKGEHNQTK.[S]	MMFEkGEHNQTK	[K5](Biotin)	569.255	3	203	1	RLKMMFEkGEHNQTK	165905585	1	0	0	0	1	0	0	0	470000	0	0	0				186; 198; 203; 649; 719
Lima1	65970	165905585	NP_001107017.1	LIM domain and actin-binding protein 1 isoform a [Mus musculus]	66	2	[R].LKMMFEKGEHNQTK.[S]	LkMMFEKGEHNQTK	[K2](Biotin)	487.489	4	198	2	NVPLNRLkMMFEKGE	165905585	1	0	0	0	1	0	0	0	1.12492e+06	0	0	0				186; 198; 203; 649; 719
Lima1	65970	165905585	NP_001107017.1	LIM domain and actin-binding protein 1 isoform a [Mus musculus]	66	2	[R].HEAEKPETSENTETSGKIEK.[Y]	HEAEKPETSENTETSGkIEK	[K17](Biotin)	618.291	4	186	1	ENTETSGkIEKYNVP	165905585	1	0	0	0	1	0	0	0	177407	0	0	0				186; 198; 203; 649; 719
Lima1	65970	165905585	NP_001107017.1	LIM domain and actin-binding protein 1 isoform a [Mus musculus]	66	2	[K].EFTTQNQKSQDVGFWEGEVVR.[E]	EFTTQNQkSQDVGFWEGEVVR	[K8](Biotin)	904.094	3	719	1	EFTTQNQkSQDVGFW	165905585	1	0	0	0	1	0	0	0	287322	0	0	0				186; 198; 203; 649; 719
Lima1	65970	165905585	NP_001107017.1	LIM domain and actin-binding protein 1 isoform a [Mus musculus]	66	2	[R].HEAEKPETSENTETSGKIEKYNVPLNR.[L]	HEAEKPETSENTETSGkIEKYNVPLNR	[K17](Biotin)	666.127	5	186	2	ENTETSGkIEKYNVP	165905585	1	0	0	0	1	0	0	0	269186	0	0	0				186; 198; 203; 649; 719
Lima1	65970	165905585	NP_001107017.1	LIM domain and actin-binding protein 1 isoform a [Mus musculus]	66	2	[K].QTENARPSGEKENVGKSR.[W]	QTENARPSGEKENVGkSR	[K16](Biotin)	554.023	4	649	2	GEKENVGkSRWQGEE	165905585	1	0	0	0	1	0	0	0	76839.3	0	0	0				186; 198; 203; 649; 719
Ep400	75560	755512930	XP_011247885.1	E1A-binding protein p400 isoform X1 [Mus musculus]	160	1	[K].VAYAAQPALKTQFLTTPISQAQK.[L]	VAYAAQPALkTQFLTTPISQAQK	[K10](Biotin)	901.152	3	3034	1	YAAQPALkTQFLTTP	755512930	1	1	0	0	1	2	0	0	1101960	192108	0	0				1604; 3034
Ep400	75560	755512930	XP_011247885.1	E1A-binding protein p400 isoform X1 [Mus musculus]	160	1	[R].LPSGEVVKIAQLASIAGPQSR.[V]	LPSGEVVkIAQLASIAGPQSR	[K8](Biotin)	783.099	3	1604	1	LPSGEVVkIAQLASI	755512930	1	0	0	0	1	0	0	0	28652.8	0	0	0				1604; 3034
Nepro	212547	22122411	NP_666084.1	uncharacterized protein C3orf17 homolog [Mus musculus]	52	1	[K].TKVVVHGNLTGGSRNESGFQAK.[T]	TkVVVHGNLTGGSRNESGFQAK	[K2](Biotin)	628.823	4	517	2	AKPDLKTkVVVHGNL	22122411	0	1	0	0	0	1	0	0	0	37555.3	0	0				517
Ccdc86	108673	165905619	NP_076220.2	coiled-coil domain-containing protein 86 [Mus musculus]	37	1	[K].SNSEETGELKSTR.[V]	SNSEETGELkSTR	[K10](Biotin)	832.383	2	48	1	SEETGELkSTRVPPL	165905619	1	0	0	0	1	0	0	0	0	0	0	0				48
Smpd4	77626	568996564	XP_006522783.1	sphingomyelin phosphodiesterase 4 isoform X2 [Mus musculus]	32	1	[K].MQSPHAKLEVLHYR.[L]	MQSPHAkLEVLHYR	[K7](Biotin)	484.498	4	317	1	KMQSPHAkLEVLHYR	568996564	0	0	1	0	0	0	1	0	0	0	747524	0	267; 317	3	2
Smpd4	77626	568996564	XP_006522783.1	sphingomyelin phosphodiesterase 4 isoform X2 [Mus musculus]	32	1	[R].TPAMPFASYGLHTSLLKR.[H]	TPAMPFASYGLHTSLLkR	[K17](Biotin)	739.385	3	267	1	GLHTSLLkRHISHQT	568996564	0	0	1	1	0	0	1	1	0	0	636795	621643	267; 317	3	2
Rbm39	170791	118403314	NP_573505.2	RNA-binding protein 39 isoform a [Mus musculus]	36	1	[R].GKIGLPHSIK.[L]	GkIGLPHSIK	[K2](Biotin)	425.913	3	111	1	FNSAIRGkIGLPHSI	118403314	1	1	0	0	1	1	0	0	557339	48964.5	0	0				111
Ehmt1	77683	568914498	XP_006498485.1	histone-lysine N-methyltransferase EHMT1 isoform X1 [Mus musculus]	78	1	[R].TVIEMFKSITHSTVGAKGEK.[A]	TVIEMFkSITHSTVGAKGEK	[K7](Biotin)	598.062	4	331	2	RTVIEMFkSITHSTV	568914498	1	0	0	0	1	0	0	0	540303	0	0	0				331
Ehmt1	77683	568914498	XP_006498485.1	histone-lysine N-methyltransferase EHMT1 isoform X1 [Mus musculus]	78	1	[R].TVIEMFKSITHSTVGAK.[G]	TVIEMFkSITHSTVGAK	[K7](Biotin)	692.361	3	331	1	RTVIEMFkSITHSTV	568914498	1	1	0	0	1	1	0	0	650155	45973.6	0	0				331
Snrpa1	68981	228480232	NP_067311.4	U2 small nuclear ribonucleoprotein A' [Mus musculus]	21	1	[K].KGGPSAGDVEAIKNAIANASTLAEVER.[L]	KGGPSAGDVEAIkNAIANASTLAEVER	[K13](Biotin)	965.498	3	205	2	AGDVEAIkNAIANAS	228480232	1	1	1	1	4	2	1	1	6.46907e+06	240243	214409	295150	205	4	1	205
Snrpa1	68981	228480232	NP_067311.4	U2 small nuclear ribonucleoprotein A' [Mus musculus]	21	1	[K].GGPSAGDVEAIKNAIANASTLAEVER.[L]	GGPSAGDVEAIkNAIANASTLAEVER	[K12](Biotin)	922.797	3	205	1	AGDVEAIkNAIANAS	228480232	1	0	1	0	3	0	1	0	3.02971e+06	0	148407	0	205	4	1	205
Snrpa1	68981	228480232	NP_067311.4	U2 small nuclear ribonucleoprotein A' [Mus musculus]	21	1	[K].KGGPSAGDVEAIKNAIANASTLAEVERLK.[G]	KGGPSAGDVEAIkNAIANASTLAEVERLK	[K13](Biotin)	784.668	4	205	3	AGDVEAIkNAIANAS	228480232	1	1	1	0	2	1	1	0	1.83918e+06	44930.8	91305.3	0	205	4	1	205
Snrpa1	68981	228480232	NP_067311.4	U2 small nuclear ribonucleoprotein A' [Mus musculus]	21	1	[K].KKGGPSAGDVEAIKNAIANASTLAEVER.[L]	KKGGPSAGDVEAIkNAIANASTLAEVER	[K14](Biotin)	756.397	4	205	3	AGDVEAIkNAIANAS	228480232	1	0	0	0	1	0	0	0	337535	0	0	0	205	4	1	205
Sf3b1	81898	153791358	NP_112456.2	splicing factor 3B subunit 1 [Mus musculus]	84	1	[R].TMIISPERLDPFADGGKTPDPK.[M]	TMIISPERLDPFADGGkTPDPK	[K17](Biotin)	871.102	3	141	2	DPFADGGkTPDPKMN	153791358	1	0	0	0	1	0	0	0	224863	0	0	0				6; 141; 182
Sf3b1	81898	153791358	NP_112456.2	splicing factor 3B subunit 1 [Mus musculus]	84	1	[K].AGELKVVNGAAASQPPSKR.[K]	AGELkVVNGAAASQPPSKR	[K5](Biotin)	702.709	3	182	2	KAKAGELkVVNGAAA	153791358	1	1	0	0	1	1	0	0	288846	20922.7	0	0				6; 141; 182
Sf3b1	81898	153791358	NP_112456.2	splicing factor 3B subunit 1 [Mus musculus]	84	1	[K].IAKTHEDIEAQIR.[E]	IAkTHEDIEAQIR	[K3](Biotin)	583.97	3	6	1	MAKIAkTHEDIEA	153791358	1	1	0	0	1	1	0	0	475346	40482.9	0	0				6; 141; 182
Cpsf2	51786	568980060	XP_006516134.1	cleavage and polyadenylation specificity factor subunit 2 isoform X1 [Mus musculus]	57	1	[R].LKDSLVSSLQFCK.[A]	LkDSLVSSLQFCK	[K2](Biotin)	584.299	3	611	1	HIYQVRLkDSLVSSL	568980060	1	0	0	0	2	0	0	0	394975	0	0	0				611
Prr14	233895	34328357	NP_663564.2	proline-rich protein 14 [Mus musculus]	27	1	[R].SLKGPGK.[H]	SLkGPGK	[K3](Biotin)	456.752	2	189	1	QSTFRSLkGPGKHCH	34328357	0	0	0	1	0	0	0	1	0	0	0	333393	189; 329	2	2	329
Prr14	233895	34328357	NP_663564.2	proline-rich protein 14 [Mus musculus]	27	1	[R].ATEKITSVSPRPPIR.[Q]	ATEkITSVSPRPPIR	[K4](Biotin)	626.681	3	329	1	EQSRATEkITSVSPR	34328357	1	0	0	1	1	0	0	1	140978	0	0	109375	189; 329	2	2	329
Lmnb2	16907	113195686	NP_034852.2	lamin-B2 [Mus musculus]	35	2	[R].LKLSPSPSSR.[VI]	LkLSPSPSSR	[K2](Biotin)	649.351	2	381	1	EGEEERLkLSPSPSS	113195686	0	0	1	0	0	0	1	0	0	0	418565	0	381; 465; 492; 496	5	4
Lmnb2	16907	113195686	NP_034852.2	lamin-B2 [Mus musculus]	35	1	[R].LKNSSDKDQSLGNWR.[I]	LkNSSDKDQSLGNWR	[K2](Biotin)	658.656	3	465	2	EGRFVRLkNSSDKDQ	113195686	0	0	1	0	0	0	1	0	0	0	212519	0	381; 465; 492; 496	5	4
Lmnb2	16907	113195686	NP_034852.2	lamin-B2 [Mus musculus]	35	1	[K].FTPKYVLR.[A]	FTPkYVLR	[K4](Biotin)	625.343	2	496	1	IAYKFTPkYVLRAGQ	113195686	0	0	1	1	0	0	1	1	0	0	1.57619e+06	1.04241e+06	381; 465; 492; 496	5	4
Lmnb2	16907	113195686	NP_034852.2	lamin-B2 [Mus musculus]	35	1	[R].QVLEGEDIAYKFTPK.[Y]	QVLEGEDIAYkFTPK	[K11](Biotin)	655.333	3	492	1	EGEDIAYkFTPKYVL	113195686	0	0	1	0	0	0	1	0	0	0	93428.1	0	381; 465; 492; 496	5	4
Mdn1	100019	568925788	XP_006537539.1	midasin isoform X1 [Mus musculus]	306	1	[R].LIAAKNEKSSGELNR.[F]	LIAAKNEkSSGELNR	[K8](Biotin)	619.329	3	22	2	LIAAKNEkSSGELNR	568925788	1	1	0	0	1	1	0	0	399924	43902.4	0	0				22
Mdn1	100019	568925788	XP_006537539.1	midasin isoform X1 [Mus musculus]	306	1	[K].NEKSSGELNR.[F]	NEkSSGELNR	[K3](Biotin)	680.321	2	22	1	LIAAKNEkSSGELNR	568925788	1	0	0	0	1	0	0	0	368873	0	0	0				22
Bptf	207165	755537881	XP_011247144.1	nucleosome-remodeling factor subunit BPTF isoform X2 [Mus musculus]	239	1	[K].VMVAPLSGSVTPGTKMVLATK.[V]	VMVAPLSGSVTPGTkMVLATK	[K15](Biotin)	771.752	3	2100	1	GSVTPGTkMVLATKV	755537881	1	0	0	0	1	0	0	0	195753	0	0	0				2100
Sqstm1	18412	6754954	NP_035148.1	sequestosome-1 isoform 1 [Mus musculus]	21	1	[K].NYDIGAALDTIQYSKHPPPL.[-]	NYDIGAALDTIQYSkHPPPL	[K15](Biotin)	813.739	3	437	1	LDTIQYSkHPPPL	6754954	1	0	0	0	2	0	0	0	954144	0	0	0				437
Ptbp2	56195	568923316	XP_006501794.1	polypyrimidine tract-binding protein 2 isoform X1 [Mus musculus]	33	3	[K].YNNDKSR.[D]	YNNDkSR	[K5](Biotin)	561.756	2	268	1	NVKYNNDkSRDYTRP	568923316	1	0	0	0	1	0	0	0	45313.5	0	0	0				268
G3bp1	27041	7305075	NP_038744.1	ras GTPase-activating protein-binding protein 1 [Mus musculus]	19	1	[R].INSGGKLPNFGFVVFDDSEPVQK.[V]	INSGGkLPNFGFVVFDDSEPVQK	[K6](Biotin)	907.453	3	374	1	LRINSGGkLPNFGFV	7305075	1	0	0	0	1	0	0	0	343072	0	0	0				76; 374
G3bp1	27041	7305075	NP_038744.1	ras GTPase-activating protein-binding protein 1 [Mus musculus]	19	1	[K].VMSQNFTNCHTKIR.[H]	VMSQNFTNCHTkIR	[K12](Biotin)	654.644	3	76	1	NFTNCHTkIRHVDAH	7305075	1	0	0	0	1	0	0	0	279877	0	0	0				76; 374
Spen	56381	568931674	XP_006539132.1	msx2-interacting protein isoform X1 [Mus musculus]	237	1	[K].VAPVIAPKITSVISR.[M]	VAPVIAPkITSVISR	[K8](Biotin)	593.018	3	2613	1	VAPVIAPkITSVISR	568931674	1	0	0	0	1	0	0	0	117035	0	0	0				2613
Wdr36	225348	158517940	NP_001103485.1	WD repeat-containing protein 36 isoform 1 [Mus musculus]	48	1	[R].FAVPEPSSDPQQSKVVNLGILAQK.[S]	FAVPEPSSDPQQSkVVNLGILAQK	[K14](Biotin)	926.822	3	762	1	SSDPQQSkVVNLGIL	158517940	1	0	0	0	1	0	0	0	749236	0	0	0				762
Nup50	18141	38016154	NP_057923.2	nuclear pore complex protein Nup50 [Mus musculus]	45	1	[R].NVGFESDSGGAFKGFK.[G]	NVGFESDSGGAFkGFK	[K13](Biotin)	624.958	3	59	1	SDSGGAFkGFKGLVV	38016154	0	0	1	0	0	0	2	0	0	0	261323	0	59	2	1
U2surp	67958	171460910	NP_001108449.1	U2 snRNP-associated SURP motif-containing protein isoform 1 [Mus musculus]	107	1	[K].AFSIGKMSTAKR.[T]	AFSIGkMSTAKR	[K6](Biotin)	508.267	3	88	2	LKAFSIGkMSTAKRT	171460910	0	1	0	0	0	1	0	0	0	62309.3	0	0				82; 88
U2surp	67958	171460910	NP_001108449.1	U2 snRNP-associated SURP motif-containing protein isoform 1 [Mus musculus]	107	1	[K].LKAFSIGK.[M]	LkAFSIGK	[K2](Biotin)	545.31	2	82	1	PLLENKLkAFSIGKM	171460910	1	1	0	0	1	1	0	0	448395	57398.4	0	0				82; 88
U2surp	67958	171460910	NP_001108449.1	U2 snRNP-associated SURP motif-containing protein isoform 1 [Mus musculus]	107	1	[R].ESLCDSPHQNLSRPLLENKLK.[A]	ESLCDSPHQNLSRPLLENKLK	[K](Biotin)			X	1
Utp15	105372	30725776	NP_849249.1	U3 small nucleolar RNA-associated protein 15 homolog [Mus musculus]	40	1	[R].VLEPKCVIR.[T]	VLEPkCVIR	[K5](Biotin)	670.366	2	384	1	LDRVLEPkCVIRTPE	30725776	1	0	0	0	1	0	0	0	276256	0	0	0				384
H2afy	26914	41152517	NP_036145.1	core histone macro-H2A.1 isoform 1 [Mus musculus]	47	1	[K].AASADSTTEGTPTDGFTVLSTKSLFLGQK.[L]	AASADSTTEGTPTDGFTVLSTkSLFLGQK	[K22](Biotin)	1052.85	3	189	1	GFTVLSTkSLFLGQK	41152517	1	1	0	0	1	1	0	0	432185	0	0	0				189
Sun2	223697	329299035	NP_001192274.1	SUN domain-containing protein 2 isoform 1 [Mus musculus]	27	1	[R].KSSNMKHLSPAPQLGPSSDSHTSYYSESVVR.[E]	KSSNMKHLSPAPQLGPSSDSHTSYYSESVVR	[K](Biotin)			X	2
Sun2	223697	329299035	NP_001192274.1	SUN domain-containing protein 2 isoform 1 [Mus musculus]	27	1	[K].SSNMKHLSPAPQLGPSSDSHTSYYSESVVR.[E]	SSNMkHLSPAPQLGPSSDSHTSYYSESVVR	[K5](Biotin)	869.41	4	52	1	KRKSSNMkHLSPAPQ	329299035	0	0	1	1	0	0	2	2	0	0	974551	1.39531e+06	52	8	1
Sun2	223697	329299035	NP_001192274.1	SUN domain-containing protein 2 isoform 1 [Mus musculus]	27	1	[K].SSNMKHLSPAPQLGPSSDSHTSYYSESVVR.[E]	SSNMkHLSPAPQLGPSSDSHTSYYSESVVR	[K5](Biotin)	869.41	4	52	1	KRKSSNMkHLSPAPQ	329299035	0	0	1	1	0	0	2	2	0	0	974551	1.39531e+06	52	8	1
Rai14	75646	13507620	NP_109615.1	ankycorbin [Mus musculus]	101	1	[K].ETQSKYEEAMKEVLSVQKQMK.[L]	ETQSKYEEAMKEVLSVQkQMK	[K18](Biotin)	685.839	4	505	3	KEVLSVQkQMKLGLL	13507620	0	1	0	0	0	1	0	0	0	42238.7	0	0				505
Nono	53610	357394934	NP_001239447.1	non-POU domain-containing octamer-binding protein [Mus musculus]	27	1	[-].MQSNKAFNLEKQNHTPR.[K]	MQSNkAFNLEKQNHTPR	[K5](Biotin)	771.041	3	5	2	MQSNkAFNLEKQ	357394934	0	1	0	0	0	1	0	0	0	42463.5	0	0	5; 373	2	2	5; 192; 251; 373
Nono	53610	357394934	NP_001239447.1	non-POU domain-containing octamer-binding protein [Mus musculus]	27	1	[K].NQQFHKER.[E]	NQQFHkER	[K6](Biotin)	438.212	3	251	1	IKNQQFHkEREQPPR	357394934	0	1	0	0	0	1	0	0	0	27739	0	0	5; 373	2	2	5; 192; 251; 373
Nono	53610	357394934	NP_001239447.1	non-POU domain-containing octamer-binding protein [Mus musculus]	27	1	[R].RQQEGFKGTFPDAR.[E]	RQQEGFkGTFPDAR	[K7](Biotin)	621.638	3	373	2	RRQQEGFkGTFPDAR	357394934	1	1	1	0	1	1	1	0	2.05055e+06	195455	334756	0	5; 373	2	2	5; 192; 251; 373
Nono	53610	357394934	NP_001239447.1	non-POU domain-containing octamer-binding protein [Mus musculus]	27	1	[-].MQSNKAFNLEK.[Q]	MQSNkAFNLEK	[K5](Biotin)	789.377	2	5	1	MQSNkAFNLEKQ	357394934	1	1	1	0	1	2	1	0	1.852e+06	230120	267922	0	5; 373	2	2	5; 192; 251; 373
Nono	53610	357394934	NP_001239447.1	non-POU domain-containing octamer-binding protein [Mus musculus]	27	1	[R].QQEGFKGTFPDAR.[E]	QQEGFkGTFPDAR	[K6](Biotin)	569.604	3	373	1	RRQQEGFkGTFPDAR	357394934	1	1	0	0	1	1	0	0	377750	32241.4	0	0	5; 373	2	2	5; 192; 251; 373
Nono	53610	357394934	NP_001239447.1	non-POU domain-containing octamer-binding protein [Mus musculus]	27	1	[R].RQQEGFKGTFPDAREQEIR.[M]	RQQEGFkGTFPDAREQEIR	[K7](Biotin)	630.313	4	373	3	RRQQEGFkGTFPDAR	357394934	0	1	0	0	0	1	0	0	0	56652	0	0	5; 373	2	2	5; 192; 251; 373
Nono	53610	357394934	NP_001239447.1	non-POU domain-containing octamer-binding protein [Mus musculus]	27	1	[R].GRPSGKGIVEFSGKPAAR.[K]	GRPSGkGIVEFSGKPAAR	[K6](Biotin)	510.775	4	192	1	DRGRPSGkGIVEFSG	357394934	1	0	0	0	1	0	0	0	0	0	0	0	5; 373	2	2	5; 192; 251; 373
Hnrnpdl	50926	148664250	NP_057899.2	heterogeneous nuclear ribonucleoprotein D-like [Mus musculus]	28	1	[R].YHQIGSGKCEIK.[V]	YHQIGSGkCEIK	[K8](Biotin)	549.266	3	302	1	YHQIGSGkCEIKVAQ	148664250	1	1	0	0	1	1	0	0	371319	30771.9	0	0				302
Exosc10	50912	568931575	XP_006539086.1	exosome component 10 isoform X2 [Mus musculus]	64	1	[R].LLHAKNIVRPQLR.[F]	LLHAkNIVRPQLR	[K5](Biotin)	446.767	4	178	1	TFRLLHAkNIVRPQL	568931575	1	0	0	0	1	0	0	0	722418	0	0	0				178; 716
Exosc10	50912	568931575	XP_006539086.1	exosome component 10 isoform X2 [Mus musculus]	64	1	[K].FDPSSKIYEISNR.[W]	FDPSSkIYEISNR	[K6](Biotin)	594.622	3	716	1	AKFDPSSkIYEISNR	568931575	1	0	0	0	1	0	0	0	140314	0	0	0				178; 716
Nup205	70699	568942833	XP_006506652.1	nuclear pore complex protein Nup205 isoform X1 [Mus musculus]	86	1	[R].TLFKSR.[R]	TLFkSR	[K4](Biotin)	489.266	2	1985	1	FASRTLFkSRRLQEP	568942833	1	0	1	0	1	0	1	0	425277	0	336291	0	1985	1	1	1985
Puf60	67959	76677895	NP_598452.2	poly(U)-binding-splicing factor PUF60 isoform b [Mus musculus]	32	1	[R].HMVMQKLLR.[K]	HMVMQkLLR	[K6](Biotin)	461.247	3	442	1	ARHMVMQkLLRKQES	76677895	1	1	0	0	2	1	0	0	865154	0	0	0				442
Puf60	67959	76677895	NP_598452.2	poly(U)-binding-splicing factor PUF60 isoform b [Mus musculus]	32	1	[R].HMVMQKLLR.[K]	HMVMQkLLR	[K6](Biotin)	461.247	3	442	1	ARHMVMQkLLRKQES	76677895	1	1	0	0	2	1	0	0	865154	0	0	0				442
Prrc2c	226562	568910696	XP_006496829.1	protein PRRC2C isoform X1 [Mus musculus]	198	1	[R].SVSHGSNHAQNAEEQRNEPSVSIPKVINR.[C]	SVSHGSNHAQNAEEQRNEPSVSIPkVINR	[K25](Biotin)	853.421	4	923	2	EPSVSIPkVINRCMD	568910696	1	0	0	0	1	0	0	0	323862	0	0	0				923
Rbm17	76938	22779924	NP_690037.1	splicing factor 45 [Mus musculus]	36	1	[R].GGKIIVGDATEKGEAQDASKK.[S]	GGkIIVGDATEKGEAQDASKK	[K3](Biotin)	582.804	4	276	3	KTSKRGGkIIVGDAT	22779924	1	0	0	0	1	0	0	0	120743	0	0	0				24; 58; 276
Rbm17	76938	22779924	NP_690037.1	splicing factor 45 [Mus musculus]	36	1	[K].NFKLLQSQLQVKK.[A]	NFkLLQSQLQVKK	[K3](Biotin)	600.678	3	24	2	EGWSKNFkLLQSQLQ	22779924	1	0	0	0	1	0	0	0	235199	0	0	0				24; 58; 276
Rbm17	76938	22779924	NP_690037.1	splicing factor 45 [Mus musculus]	36	1	[K].QSTVLAPVIDLKR.[G]	QSTVLAPVIDLkR	[K12](Biotin)	555.984	3	58	1	LAPVIDLkRGGSSDD	22779924	1	1	0	0	1	1	0	0	196803	16293.5	0	0				24; 58; 276
Rbm17	76938	22779924	NP_690037.1	splicing factor 45 [Mus musculus]	36	1	[K].RGGKIIVGDATEKGEAQDASK.[K]	RGGkIIVGDATEKGEAQDASK	[K4](Biotin)	589.802	4	276	3	KTSKRGGkIIVGDAT	22779924	0	1	0	0	0	1	0	0	0	30046.6	0	0				24; 58; 276
Rbm17	76938	22779924	NP_690037.1	splicing factor 45 [Mus musculus]	36	1	[R].GGKIIVGDATEKGEAQDASK.[K]	GGkIIVGDATEKGEAQDASK	[K3](Biotin)	734.038	3	276	2	KTSKRGGkIIVGDAT	22779924	1	0	0	0	1	0	0	0	0	0	0	0				24; 58; 276
Smarca5	93762	40254124	NP_444354.2	SWI/SNF-related matrix-associated actin-dependent regulator of chromatin subfamily A member 5 [Mus musculus]	94	1	[K].QKIAFTEWIEPPKR.[E]	QkIAFTEWIEPPKR	[K2](Biotin)	657.017	3	723	2	EDYREKQkIAFTEWI	40254124	1	1	1	1	2	3	1	1	5994386	889715	386269	403074	723	2	1	723
Smarca5	93762	40254124	NP_444354.2	SWI/SNF-related matrix-associated actin-dependent regulator of chromatin subfamily A member 5 [Mus musculus]	94	1	[K].QKIAFTEWIEPPKRER.[K]	QkIAFTEWIEPPKRER	[K2](Biotin)	564.301	4	723	3	EDYREKQkIAFTEWI	40254124	1	1	0	0	1	2	0	0	331928	189302	0	0	723	2	1	723
Rpl29	19944	6677781	NP_033108.1	60S ribosomal protein L29 [Mus musculus]	32	1	[K].GAQAPVKAP.[-]	GAQAPVkAP	[K7](Biotin)	532.782	2	158	1	KGAQAPVkAP	6677781	1	0	1	1	1	0	1	1	586004	0	891590	630950	151; 158	3	2	158
Rpl29	19944	6677781	NP_033108.1	60S ribosomal protein L29 [Mus musculus]	32	1	[K].GAQAPKGAQAPVKAP.[-]	GAQAPkGAQAPVKAP	[K6](Biotin)	808.934	2	151	2	PKGAQAPkGAQAPVK	6677781	0	0	1	0	0	0	1	0	0	0	0	0	151; 158	3	2	158
Zmym4	67785	167555112	NP_001107871.1	zinc finger MYM-type protein 4 [Mus musculus]	117	1	[R].KDFCLVR.[E]	kDFCLVR	[K1](Biotin)	582.289	2	152	1	SVFKSIRkDFCLVRE	167555112	1	0	0	0	1	0	0	0	150130	0	0	0				152
Hnrnpf	98758	261878607	NP_001159904.1	heterogeneous nuclear ribonucleoprotein F [Mus musculus]	16	1	[R].RYIGIVKQAGLDR.[M]	RYIGIVkQAGLDR	[K7](Biotin)	572.32	3	224	2	RRYIGIVkQAGLDRM	261878607	1	1	1	1	1	2	1	1	1.0641e+06	148402	307460	189634	224	2	1	224
Sf3a1	67465	165932270	NP_080451.4	splicing factor 3A subunit 1 [Mus musculus]	58	1	[K].AKGLVPEDDTKEK.[I]	AkGLVPEDDTKEK	[K2](Biotin)	552.616	3	531	2	IEAIHKAkGLVPEDD	165932270	1	0	0	0	1	0	0	0	747575	0	0	0				531
Son	20658	568997402	XP_006523032.1	protein SON isoform X1 [Mus musculus]	118	1	[K].SLETMPPETSKTTLVELPIAK.[V]	SLETMPPETSkTTLVELPIAK	[K11](Biotin)	837.776	3	284	1	TMPPETSkTTLVELP	568997402	1	0	0	0	1	0	0	0	150073	0	0	0				284
Cyb5a	109672	13385268	NP_080073.1	cytochrome b5 [Mus musculus]	10	1	[K].STWVILHHKVYDLTK.[F]	STWVILHHkVYDLTK	[K9](Biotin)	517.279	4	33	1	TWVILHHkVYDLTKF	13385268	0	0	1	0	0	0	1	0	0	0	226492	0	33	1	1
Tpr	108989	270309140	NP_598541.3	nucleoprotein TPR [Mus musculus]	176	1	[K].IVKPGMK.[L]	IVkPGMK	[K3](Biotin)	507.778	2	464	0	AAVAKIVkPGMKLTE	270309140	1	1	1	1	3	3	2	3	3.04759e+07	4.89919e+06	2.0565e+07	2.3709e+07	464	10	1	464
Tpr	108989	270309140	NP_598541.3	nucleoprotein TPR [Mus musculus]	176	1	[K].IVKPGMK.[L]	IVkPGMK	[K3](Biotin)	507.778	2	464	0	AAVAKIVkPGMKLTE	270309140	1	1	1	1	3	3	2	3	3.04759e+07	4.89919e+06	2.0565e+07	2.3709e+07	464	10	1	464
Gatad2b	229542	21314854	NP_647465.1	transcriptional repressor p66-beta [Mus musculus]	36	1	[R].LKMLALLK.[R]	LkMLALLK	[K2](Biotin)	578.353	2	44	1	HEAMERLkMLALLKR	21314854	1	0	0	0	2	0	0	0	878225	0	0	0				44
Plec	18810	254675115	NP_001157012.1	plectin isoform 12alpha [Mus musculus]	264	2	[R].LLASGKVAQR.[A]	LLASGkVAQR	[K6](Biotin)	634.862	2	578	1	IRLLASGkVAQRAGE	254675115	1	1	1	1	1	1	1	1	3.06449e+06	230597	447305	349196	578	2	1	578; 1726; 1733; 2404; 2572; 2638; 2644; 3060; 4616
Plec	18810	254675115	NP_001157012.1	plectin isoform 12alpha [Mus musculus]	264	2	[R].TELATQEKVTLVQTLEIQR.[Q]	TELATQEkVTLVQTLEIQR	[K8](Biotin)	809.438	3	2572	1	TELATQEkVTLVQTL	254675115	1	0	0	0	2	0	0	0	619081	0	0	0	578	2	1	578; 1726; 1733; 2404; 2572; 2638; 2644; 3060; 4616
Plec	18810	254675115	NP_001157012.1	plectin isoform 12alpha [Mus musculus]	264	2	[R].SAEVELQSKR.[A]	SAEVELQSkR	[K9](Biotin)	686.849	2	1726	1	AEVELQSkRASFAEK	254675115	1	1	0	0	1	1	0	0	800302	54648.7	0	0	578	2	1	578; 1726; 1733; 2404; 2572; 2638; 2644; 3060; 4616
Plec	18810	254675115	NP_001157012.1	plectin isoform 12alpha [Mus musculus]	264	2	[K].RASFAEKTAQLER.[T]	RASFAEkTAQLER	[K7](Biotin)	578.298	3	1733	2	KRASFAEkTAQLERT	254675115	1	1	0	0	1	1	0	0	938120	125810	0	0	578	2	1	578; 1726; 1733; 2404; 2572; 2638; 2644; 3060; 4616
Plec	18810	254675115	NP_001157012.1	plectin isoform 12alpha [Mus musculus]	264	2	[R].ASFAEKTAQLER.[T]	ASFAEkTAQLER	[K6](Biotin)	788.893	2	1733	1	KRASFAEkTAQLERT	254675115	1	1	0	0	1	2	0	0	536244	149339	0	0	578	2	1	578; 1726; 1733; 2404; 2572; 2638; 2644; 3060; 4616
Plec	18810	254675115	NP_001157012.1	plectin isoform 12alpha [Mus musculus]	264	2	[R].DKDNTQR.[F]	DkDNTQR	[K2](Biotin)	551.751	2	2404	1	RALILRDkDNTQRFL	254675115	1	0	0	0	1	0	0	0	357701	0	0	0	578	2	1	578; 1726; 1733; 2404; 2572; 2638; 2644; 3060; 4616
Plec	18810	254675115	NP_001157012.1	plectin isoform 12alpha [Mus musculus]	264	2	[K].SFLSEKDSLLQR.[E]	SFLSEkDSLLQR	[K6](Biotin)	550.284	3	2644	1	QKSFLSEkDSLLQRE	254675115	1	0	0	0	1	0	0	0	85060.3	0	0	0	578	2	1	578; 1726; 1733; 2404; 2572; 2638; 2644; 3060; 4616
Plec	18810	254675115	NP_001157012.1	plectin isoform 12alpha [Mus musculus]	264	2	[K].ATVSAPFGKFQGR.[T]	ATVSAPFGkFQGR	[K9](Biotin)	796.405	2	3060	1	TVSAPFGkFQGRTVT	254675115	1	0	0	0	1	0	0	0	408821	0	0	0	578	2	1	578; 1726; 1733; 2404; 2572; 2638; 2644; 3060; 4616
Plec	18810	254675115	NP_001157012.1	plectin isoform 12alpha [Mus musculus]	264	2	[K].LHRTELATQEKVTLVQTLEIQR.[Q]	LHRTELATQEkVTLVQTLEIQR	[K11](Biotin)	708.891	4	2572	2	TELATQEkVTLVQTL	254675115	1	0	0	0	1	0	0	0	309272	0	0	0	578	2	1	578; 1726; 1733; 2404; 2572; 2638; 2644; 3060; 4616
Plec	18810	254675115	NP_001157012.1	plectin isoform 12alpha [Mus musculus]	264	2	[R].LLEAAAQSSKGYYSPYSVSGSGSTAGSR.[T]	LLEAAAQSSkGYYSPYSVSGSGSTAGSR	[K10](Biotin)	1003.14	3	4616	1	EAAAQSSkGYYSPYS	254675115	1	1	0	0	1	1	0	0	1.03233e+06	110479	0	0	578	2	1	578; 1726; 1733; 2404; 2572; 2638; 2644; 3060; 4616
Plec	18810	254675115	NP_001157012.1	plectin isoform 12alpha [Mus musculus]	264	2	[K].SEEMQTVQQEQILQETQALQKSFLSEKDSLLQR.[E]	SEEMQTVQQEQILQETQALQkSFLSEKDSLLQR	[K21](Biotin)	1030.52	4	2638	2	QETQALQkSFLSEKD	254675115	1	0	0	0	1	0	0	0	284220	0	0	0	578	2	1	578; 1726; 1733; 2404; 2572; 2638; 2644; 3060; 4616
Nup133	234865	283806543	NP_758492.2	nuclear pore complex protein Nup133 [Mus musculus]	54	1	[R].GSESMVFETTTKNETVAHEDKTK.[L]	GSESMVFETTTkNETVAHEDKTK	[K12](Biotin)	699.579	4	508	2	MVFETTTkNETVAHE	283806543	0	0	1	0	0	0	1	0	0	0	343425	0	508; 1088	6	2
Nup133	234865	283806543	NP_758492.2	nuclear pore complex protein Nup133 [Mus musculus]	54	1	[R].ALQRDDWSGSDGKDDPIEVSKDSVFVK.[I]	ALQRDDWSGSDGkDDPIEVSKDSVFVK	[K13](Biotin)	1073.85	3	1088	3	DWSGSDGkDDPIEVS	283806543	0	0	1	1	0	0	2	1	0	0	3.20948e+06	1.93781e+06	508; 1088	6	2
Nup133	234865	283806543	NP_758492.2	nuclear pore complex protein Nup133 [Mus musculus]	54	1	[R].DDWSGSDGKDDPIEVSKDSVFVK.[I]	DDWSGSDGkDDPIEVSKDSVFVK	[K9](Biotin)	917.756	3	1088	2	DWSGSDGkDDPIEVS	283806543	0	0	1	1	0	0	1	1	0	0	907545	733930	508; 1088	6	2
Smchd1	74355	148839318	NP_083163.3	structural maintenance of chromosomes flexible hinge domain-containing protein 1 [Mus musculus]	162	1	[R].CNESLCHSPKIEVTECPIPTKR.[M]	CNESLCHSPkIEVTECPIPTKR	[K10](Biotin)	961.123	3	1977	2	ESLCHSPkIEVTECP	148839318	1	1	1	1	2	1	1	1	2809698	257528	338813	262560	1977	2	1	1977
Rai1	19377	83649747	NP_033047.2	retinoic acid-induced protein 1 [Mus musculus]	122	1	[R].THSLHVPPPQPQQPLAYPKLQR.[Q]	THSLHVPPPQPQQPLAYPkLQR	[K19](Biotin)	690.373	4	180	1	QQPLAYPkLQRQKPQ	83649747	0	1	0	0	0	1	0	0	0	0	0	0				180
Sin3a	20466	755529837	XP_011240987.1	paired amphipathic helix protein Sin3a isoform X1 [Mus musculus]	87	1	[R].FKLNSYKMVYVIK.[S]	FKLNSYKMVYVIK	[K](Biotin)			X	2
Polr2a	20020	597517934	NP_001277997.1	DNA-directed RNA polymerase II subunit RPB1 [Mus musculus]	105	1	[R].MIWNAQKIFHINPR.[L]	MIWNAQkIFHINPR	[K7](Biotin)	665.347	3	992	1	RMIWNAQkIFHINPR	597517934	1	0	0	0	2	0	0	0	823845	0	0	0				992
Polr2a	20020	597517934	NP_001277997.1	DNA-directed RNA polymerase II subunit RPB1 [Mus musculus]	105	1	[R].MIWNAQKIFHINPR.[L]	MIWNAQkIFHINPR	[K7](Biotin)	665.347	3	992	1	RMIWNAQkIFHINPR	597517934	1	0	0	0	2	0	0	0	823845	0	0	0				992
Pnn	18949	112420990	NP_032917.2	pinin [Mus musculus]	61	1	[R].QESDPEDDDVKKPALQSSVVATSK.[E]	QESDPEDDDVkkPALQSSVVATSK	[K11; K12](Biotin)	757.106	4	108; 109	1	DPEDDDVkKPALQSS; PEDDDVKkPALQSSV	112420990	2	0	2	2	1	0	1	1	338445	0	183923	95173.8	108; 109; 212	4	3	108; 109; 212
Pnn	18949	112420990	NP_032917.2	pinin [Mus musculus]	61	1	[R].LLEQKVELAQLQEEWNEHNAK.[I]	LLEQkVELAQLQEEWNEHNAK	[K5](Biotin)	925.799	3	212	1	ELRLLEQkVELAQLQ	112420990	1	1	1	0	3	4	2	0	1.66506e+07	1.16716e+06	1.21564e+06	0	108; 109; 212	4	3	108; 109; 212
Pnn	18949	112420990	NP_032917.2	pinin [Mus musculus]	61	1	[RK].AKESIK.[LN]	AkESIK	[K2](Biotin)			1	1	mAVAVRAL
Pdcd11	18572	54607128	NP_035183.2	protein RRP5 homolog [Mus musculus]	170	1	[K].LKIEKR.[K]	LkIEKR	[K2](Biotin)	338.204	3	58	2	PAKTKKLkIEKRKSI	54607128	0	0	1	0	0	0	1	0	0	0	145323	0	58	1	1
Sf3b2	319322	268837785	NP_084385.2	splicing factor 3B subunit 2 [Mus musculus]	81	1	[K].IPQALEKILQLK.[E]	IPQALEkILQLK	[K7](Biotin)	540.657	3	258	1	KIPQALEkILQLKES	268837785	1	0	0	0	2	0	0	0	299102	0	0	0				258
Pes1	64934	12584984	NP_075027.1	pescadillo homolog [Mus musculus]	56	1	[K].YLYQKIMFGK.[R]	YLYQkIMFGK	[K5](Biotin)	758.89	2	546	1	REKYLYQkIMFGKRR	12584984	1	1	0	0	1	1	0	0	326165	29633.9	0	0				546
Pes1	64934	12584984	NP_075027.1	pescadillo homolog [Mus musculus]	56	1	[R].EKYLYQKIMFGK.[R]	EKYLYQkIMFGK	[K7](Biotin)	591.974	3	546	2	REKYLYQkIMFGKRR	12584984	1	0	0	0	1	0	0	0	561073	0	0	0				546
Pes1	64934	12584984	NP_075027.1	pescadillo homolog [Mus musculus]	56	1	[R].EKYLYQKIMFGKR.[R]	EKYLYQkIMFGKR	[K7](Biotin)	483.257	4	546	3	REKYLYQkIMFGKRR	12584984	1	0	0	0	1	0	0	0	174219	0	0	0				546
Lmna	16905	568921945	XP_006501136.1	prelamin-A/C isoform X1 [Mus musculus]	39	1	[R].VAVEEVDEEGKFVR.[L]	VAVEEVDEEGkFVR	[K11](Biotin)	611.301	3	450	1	EEVDEEGkFVRLRNK	568921945	0	0	1	1	0	0	1	1	0	0	1.04614e+06	351333	208; 233; 420; 450	15	4	208
Lmna	16905	568921945	XP_006501136.1	prelamin-A/C isoform X1 [Mus musculus]	39	1	[R].ASSHSSQSQGGGSVTKK.[R]	ASSHSSQSQGGGSVTKK	[K](Biotin)			X	1
Lmna	16905	568921945	XP_006501136.1	prelamin-A/C isoform X1 [Mus musculus]	39	1	[R].LVEIDNGKQREFESR.[L]	LVEIDNGkQREFESR	[K8](Biotin)	682.674	3	233	2	LVEIDNGkQREFESR	568921945	0	0	1	1	0	0	1	1	0	0	2.97214e+06	2.68481e+06	208; 233; 420; 450	15	4	208
Lmna	16905	568921945	XP_006501136.1	prelamin-A/C isoform X1 [Mus musculus]	39	1	[R].LVEIDNGKQR.[E]	LVEIDNGkQR	[K8](Biotin)	699.364	2	233	1	LVEIDNGkQREFESR	568921945	0	0	1	1	0	0	2	1	0	0	4.38652e+06	1.9956e+06	208; 233; 420; 450	15	4	208
Lmna	16905	568921945	XP_006501136.1	prelamin-A/C isoform X1 [Mus musculus]	39	1	[K].RKLESSESR.[S]	RkLESSESR	[K2](Biotin)	439.891	3	420	2	GSVTKKRkLESSESR	568921945	0	0	1	1	0	0	2	1	0	0	1.13179e+06	854490	208; 233; 420; 450	15	4	208
Lmna	16905	568921945	XP_006501136.1	prelamin-A/C isoform X1 [Mus musculus]	39	1	[R].KLESSESR.[S]	kLESSESR	[K1](Biotin)	581.282	2	420	1	GSVTKKRkLESSESR	568921945	0	0	1	1	0	0	2	2	0	0	17158108	12354636	208; 233; 420; 450	15	4	208
Lmna	16905	568921945	XP_006501136.1	prelamin-A/C isoform X1 [Mus musculus]	39	1	[R].LQTLKEELDFQKNIYSEELR.[E]	LQTLKEELDFQkNIYSEELR	[K12](Biotin)	908.134	3	208	2	KEELDFQkNIYSEEL	568921945	1	0	1	0	1	0	1	0	162221	0	295853	0	208; 233; 420; 450	15	4	208
Nup93	71805	27369533	NP_765998.1	nuclear pore complex protein Nup93 [Mus musculus]	40	1	[R].TSQETADVKASVLLGSR.[G]	TSQETADVkASVLLGSR	[K9](Biotin)	663.343	3	59	1	SQETADVkASVLLGS	27369533	1	0	1	0	1	0	1	0	206891	0	129379	0	59	1	1	59
Ranbp2	19386	153792534	NP_035370.2	E3 SUMO-protein ligase RanBP2 [Mus musculus]	257	1	[K].FGHVDQEKTPSFAFQGGSNTEFK.[S]	FGHVDQEkTPSFAFQGGSNTEFK	[K8](Biotin)	696.823	4	1703	1	FGHVDQEkTPSFAFQ	153792534	0	0	1	0	0	0	1	0	0	0	248224	0	5; 776; 982; 996; 1133; 1448; 1695; 1703; 1721; 1822; 2002; 2011; 2015; 2018; 2303; 2351; 2360; 2430; 2594	38	19	5; 812; 982; 996; 1133; 1448; 1721; 1993; 2002; 2018; 2303; 2351; 2360; 2430
Ranbp2	19386	153792534	NP_035370.2	E3 SUMO-protein ligase RanBP2 [Mus musculus]	257	1	[R].AEEMKSGLKDFK.[T]	AEEMkSGLKDFK	[K5](Biotin)	536.929	3	2011	2	IQRAEEMkSGLKDFK	153792534	0	0	0	1	0	0	0	1	0	0	0	154775	5; 776; 982; 996; 1133; 1448; 1695; 1703; 1721; 1822; 2002; 2011; 2015; 2018; 2303; 2351; 2360; 2430; 2594	38	19	5; 812; 982; 996; 1133; 1448; 1721; 1993; 2002; 2018; 2303; 2351; 2360; 2430
Ranbp2	19386	153792534	NP_035370.2	E3 SUMO-protein ligase RanBP2 [Mus musculus]	257	1	[K].VGISEQKFK.[F]	VGISEQKFk	[K9](Biotin)	631.337	2	1695	1	GISEQKFkFGHVDQE	153792534	0	0	0	1	0	0	0	1	0	0	0	252204	5; 776; 982; 996; 1133; 1448; 1695; 1703; 1721; 1822; 2002; 2011; 2015; 2018; 2303; 2351; 2360; 2430; 2594	38	19	5; 812; 982; 996; 1133; 1448; 1721; 1993; 2002; 2018; 2303; 2351; 2360; 2430
Ranbp2	19386	153792534	NP_035370.2	E3 SUMO-protein ligase RanBP2 [Mus musculus]	257	1	[K].SIKDGFSFCIPVSADGFKFGIQEK.[G]	SIkDGFSFCIPVSADGFKFGIQEK	[K3](Biotin)	968.478	3	1721	2	NTEFKSIkDGFSFCI	153792534	1	0	1	1	1	0	1	1	116732	0	102692	321234	5; 776; 982; 996; 1133; 1448; 1695; 1703; 1721; 1822; 2002; 2011; 2015; 2018; 2303; 2351; 2360; 2430; 2594	38	19	5; 812; 982; 996; 1133; 1448; 1721; 1993; 2002; 2018; 2303; 2351; 2360; 2430
Ranbp2	19386	153792534	NP_035370.2	E3 SUMO-protein ligase RanBP2 [Mus musculus]	257	1	[K].SIKDGFSFCIPVSADGFK.[F]	SIkDGFSFCIPVSADGFK	[K3](Biotin)	1101.03	2	1721	1	NTEFKSIkDGFSFCI	153792534	1	1	1	1	5	2	5	2	2.26969e+07	252181	2.24027e+07	5.93877e+06	5; 776; 982; 996; 1133; 1448; 1695; 1703; 1721; 1822; 2002; 2011; 2015; 2018; 2303; 2351; 2360; 2430; 2594	38	19	5; 812; 982; 996; 1133; 1448; 1721; 1993; 2002; 2018; 2303; 2351; 2360; 2430
Ranbp2	19386	153792534	NP_035370.2	E3 SUMO-protein ligase RanBP2 [Mus musculus]	257	1	[K].VKPDKCELPQNSDIKQSSDGKVK.[N]	VKPDKCELPQNSDIKQSSDGKVK	[K](Biotin)			X	3
Ranbp2	19386	153792534	NP_035370.2	E3 SUMO-protein ligase RanBP2 [Mus musculus]	257	1	[K].FKFGHVDQEKTPSFAFQGGSNTEFK.[S]	FKFGHVDQEkTPSFAFQGGSNTEFK	[K10](Biotin)	765.615	4	1703	2	FGHVDQEkTPSFAFQ	153792534	0	0	0	1	0	0	0	1	0	0	0	611008	5; 776; 982; 996; 1133; 1448; 1695; 1703; 1721; 1822; 2002; 2011; 2015; 2018; 2303; 2351; 2360; 2430; 2594	38	19	5; 812; 982; 996; 1133; 1448; 1721; 1993; 2002; 2018; 2303; 2351; 2360; 2430
Ranbp2	19386	153792534	NP_035370.2	E3 SUMO-protein ligase RanBP2 [Mus musculus]	257	1	[R].ESPCGKIAIAVLEETTR.[E]	ESPCGkIAIAVLEETTR	[K6](Biotin)	700.688	3	2303	1	PRESPCGkIAIAVLE	153792534	1	0	1	1	2	0	3	3	514270	0	1.11995e+06	1.11501e+06	5; 776; 982; 996; 1133; 1448; 1695; 1703; 1721; 1822; 2002; 2011; 2015; 2018; 2303; 2351; 2360; 2430; 2594	38	19	5; 812; 982; 996; 1133; 1448; 1721; 1993; 2002; 2018; 2303; 2351; 2360; 2430
Ranbp2	19386	153792534	NP_035370.2	E3 SUMO-protein ligase RanBP2 [Mus musculus]	257	1	[K].SGLKDFK.[T]	SGLkDFK	[K4](Biotin)	510.763	2	2015	1	EEMKSGLkDFKTFLT	153792534	0	0	1	0	0	0	1	0	0	0	430499	0	5; 776; 982; 996; 1133; 1448; 1695; 1703; 1721; 1822; 2002; 2011; 2015; 2018; 2303; 2351; 2360; 2430; 2594	38	19	5; 812; 982; 996; 1133; 1448; 1721; 1993; 2002; 2018; 2303; 2351; 2360; 2430
Ranbp2	19386	153792534	NP_035370.2	E3 SUMO-protein ligase RanBP2 [Mus musculus]	257	1	[R].SKADVER.[Y]	SkADVER	[K2](Biotin)	515.753	2	5	1	MRRSkADVERYI	153792534	1	1	1	0	1	1	1	0	206920	20664.9	451073	0	5; 776; 982; 996; 1133; 1448; 1695; 1703; 1721; 1822; 2002; 2011; 2015; 2018; 2303; 2351; 2360; 2430; 2594	38	19	5; 812; 982; 996; 1133; 1448; 1721; 1993; 2002; 2018; 2303; 2351; 2360; 2430
Ranbp2	19386	153792534	NP_035370.2	E3 SUMO-protein ligase RanBP2 [Mus musculus]	257	1	[K].SASSFVQTSFKFGQGDLPK.[S]	SASSFVQTSFkFGQGDLPK	[K11](Biotin)	753.039	3	1448	1	SFVQTSFkFGQGDLP	153792534	1	0	1	1	1	0	1	1	296801	0	363080	459600	5; 776; 982; 996; 1133; 1448; 1695; 1703; 1721; 1822; 2002; 2011; 2015; 2018; 2303; 2351; 2360; 2430; 2594	38	19	5; 812; 982; 996; 1133; 1448; 1721; 1993; 2002; 2018; 2303; 2351; 2360; 2430
Ranbp2	19386	153792534	NP_035370.2	E3 SUMO-protein ligase RanBP2 [Mus musculus]	257	1	[R].AAKLIQR.[A]	AAkLIQR	[K3](Biotin)	513.301	2	2002	1	VDTGRAAkLIQRAEE	153792534	0	1	1	0	0	1	1	0	0	118858	2.13973e+06	0	5; 776; 982; 996; 1133; 1448; 1695; 1703; 1721; 1822; 2002; 2011; 2015; 2018; 2303; 2351; 2360; 2430; 2594	38	19	5; 812; 982; 996; 1133; 1448; 1721; 1993; 2002; 2018; 2303; 2351; 2360; 2430
Ranbp2	19386	153792534	NP_035370.2	E3 SUMO-protein ligase RanBP2 [Mus musculus]	257	1	[R].KVCEAQK.[S]	kVCEAQK	[K1](Biotin)	544.765	2	2594	1	DFQSELRkVCEAQKS	153792534	0	0	0	1	0	0	0	1	0	0	0	561411	5; 776; 982; 996; 1133; 1448; 1695; 1703; 1721; 1822; 2002; 2011; 2015; 2018; 2303; 2351; 2360; 2430; 2594	38	19	5; 812; 982; 996; 1133; 1448; 1721; 1993; 2002; 2018; 2303; 2351; 2360; 2430
Ranbp2	19386	153792534	NP_035370.2	E3 SUMO-protein ligase RanBP2 [Mus musculus]	257	1	[R].SADSELKHSTPSPTK.[Y]	SADSELkHSTPSPTK	[K7](Biotin)	604.295	3	776	1	RSADSELkHSTPSPT	153792534	0	0	1	0	0	0	1	0	0	0	136185	0	5; 776; 982; 996; 1133; 1448; 1695; 1703; 1721; 1822; 2002; 2011; 2015; 2018; 2303; 2351; 2360; 2430; 2594	38	19	5; 812; 982; 996; 1133; 1448; 1721; 1993; 2002; 2018; 2303; 2351; 2360; 2430
Ranbp2	19386	153792534	NP_035370.2	E3 SUMO-protein ligase RanBP2 [Mus musculus]	257	1	[K].QSSDGKVK.[N]	QSSDGkVK	[K6](Biotin)	537.767	2	2430	1	IKQSSDGkVKNLSAF	153792534	0	1	0	1	0	1	0	1	0	36437.7	0	373174	5; 776; 982; 996; 1133; 1448; 1695; 1703; 1721; 1822; 2002; 2011; 2015; 2018; 2303; 2351; 2360; 2430; 2594	38	19	5; 812; 982; 996; 1133; 1448; 1721; 1993; 2002; 2018; 2303; 2351; 2360; 2430
Ranbp2	19386	153792534	NP_035370.2	E3 SUMO-protein ligase RanBP2 [Mus musculus]	257	1	[R].LLLDIPLQTPHKLVDTGR.[A]	LLLDIPLQTPHkLVDTGR	[K12](Biotin)	752.425	3	1993	1	IPLQTPHkLVDTGRA	153792534	1	1	0	0	1	1	0	0	269905	25969.8	0	0	5; 776; 982; 996; 1133; 1448; 1695; 1703; 1721; 1822; 2002; 2011; 2015; 2018; 2303; 2351; 2360; 2430; 2594	38	19	5; 812; 982; 996; 1133; 1448; 1721; 1993; 2002; 2018; 2303; 2351; 2360; 2430
Ranbp2	19386	153792534	NP_035370.2	E3 SUMO-protein ligase RanBP2 [Mus musculus]	257	1	[K].SGLKDFKTFLTNDQVK.[V]	SGLKDFkTFLTNDQVK	[K7](Biotin)	689.691	3	2018	2	KSGLKDFkTFLTNDQ	153792534	1	1	1	1	1	1	1	1	415728	43777.1	712073	309994	5; 776; 982; 996; 1133; 1448; 1695; 1703; 1721; 1822; 2002; 2011; 2015; 2018; 2303; 2351; 2360; 2430; 2594	38	19	5; 812; 982; 996; 1133; 1448; 1721; 1993; 2002; 2018; 2303; 2351; 2360; 2430
Ranbp2	19386	153792534	NP_035370.2	E3 SUMO-protein ligase RanBP2 [Mus musculus]	257	1	[K].FVFGSESVKSIFSSEK.[S]	FVFGSESVkSIFSSEK	[K9](Biotin)	668.666	3	2360	1	VFGSESVkSIFSSEK	153792534	1	0	1	0	1	0	1	0	73039.8	0	66130	0	5; 776; 982; 996; 1133; 1448; 1695; 1703; 1721; 1822; 2002; 2011; 2015; 2018; 2303; 2351; 2360; 2430; 2594	38	19	5; 812; 982; 996; 1133; 1448; 1721; 1993; 2002; 2018; 2303; 2351; 2360; 2430
Ranbp2	19386	153792534	NP_035370.2	E3 SUMO-protein ligase RanBP2 [Mus musculus]	257	1	[R].SDDMFAFHGPGKSVFTTAASELANK.[S]	SDDMFAFHGPGkSVFTTAASELANK	[K12](Biotin)	952.113	3	1133	1	FAFHGPGkSVFTTAA	153792534	1	1	1	1	1	1	1	1	827693	47966.7	586426	335598	5; 776; 982; 996; 1133; 1448; 1695; 1703; 1721; 1822; 2002; 2011; 2015; 2018; 2303; 2351; 2360; 2430; 2594	38	19	5; 812; 982; 996; 1133; 1448; 1721; 1993; 2002; 2018; 2303; 2351; 2360; 2430
Ranbp2	19386	153792534	NP_035370.2	E3 SUMO-protein ligase RanBP2 [Mus musculus]	257	1	[R].GDDYFNYNVQQTSTNPPLPEPGYFTKPPLVAHASR.[S]	GDDYFNYNVQQTSTNPPLPEPGYFTkPPLVAHASR	[K26](Biotin)	1037.51	4	982	0	PEPGYFTkPPLVAHA	153792534	1	1	1	1	2	1	1	1	2.25038e+06	66772.5	761221	366441	5; 776; 982; 996; 1133; 1448; 1695; 1703; 1721; 1822; 2002; 2011; 2015; 2018; 2303; 2351; 2360; 2430; 2594	38	19	5; 812; 982; 996; 1133; 1448; 1721; 1993; 2002; 2018; 2303; 2351; 2360; 2430
Ranbp2	19386	153792534	NP_035370.2	E3 SUMO-protein ligase RanBP2 [Mus musculus]	257	1	[R].SAESKVIEFGK.[S]	SAESkVIEFGK	[K5](Biotin)	710.861	2	996	1	ASRSAESkVIEFGKS	153792534	0	1	0	1	0	1	0	2	0	93404.6	0	1.38569e+06	5; 776; 982; 996; 1133; 1448; 1695; 1703; 1721; 1822; 2002; 2011; 2015; 2018; 2303; 2351; 2360; 2430; 2594	38	19	5; 812; 982; 996; 1133; 1448; 1721; 1993; 2002; 2018; 2303; 2351; 2360; 2430
Ranbp2	19386	153792534	NP_035370.2	E3 SUMO-protein ligase RanBP2 [Mus musculus]	257	1	[K].SHETDGGSAHGDEEDDGPHFEPVVPLPDKIEVK.[T]	SHETDGGSAHGDEEDDGPHFEPVVPLPDKIEVK	[K](Biotin)			X	1
Ranbp2	19386	153792534	NP_035370.2	E3 SUMO-protein ligase RanBP2 [Mus musculus]	257	1	[R].WAEDQNSLLKMICQQVEAIKK.[E]	WAEDQNSLLkMICQQVEAIKK	[K10](Biotin)	920.13	3	812	2	EDQNSLLkMICQQVE	153792534	1	0	0	0	2	0	0	0	881473	0	0	0	5; 776; 982; 996; 1133; 1448; 1695; 1703; 1721; 1822; 2002; 2011; 2015; 2018; 2303; 2351; 2360; 2430; 2594	38	19	5; 812; 982; 996; 1133; 1448; 1721; 1993; 2002; 2018; 2303; 2351; 2360; 2430
Ranbp2	19386	153792534	NP_035370.2	E3 SUMO-protein ligase RanBP2 [Mus musculus]	257	1	[K].LFSSQSGKVAEK.[A]	LFSSQSGkVAEK	[K8](Biotin)	753.884	2	1822	1	LFSSQSGkVAEKANT	153792534	0	0	1	0	0	0	1	0	0	0	0	0	5; 776; 982; 996; 1133; 1448; 1695; 1703; 1721; 1822; 2002; 2011; 2015; 2018; 2303; 2351; 2360; 2430; 2594	38	19	5; 812; 982; 996; 1133; 1448; 1721; 1993; 2002; 2018; 2303; 2351; 2360; 2430
Ranbp2	19386	153792534	NP_035370.2	E3 SUMO-protein ligase RanBP2 [Mus musculus]	257	1	[K].AVVSPPKFVFGSESVK.[S]	AVVSPPkFVFGSESVK	[K7](Biotin)	635.339	3	2351	1	KAVVSPPkFVFGSES	153792534	1	0	1	0	1	0	1	0	0	0	0	0	5; 776; 982; 996; 1133; 1448; 1695; 1703; 1721; 1822; 2002; 2011; 2015; 2018; 2303; 2351; 2360; 2430; 2594	38	19	5; 812; 982; 996; 1133; 1448; 1721; 1993; 2002; 2018; 2303; 2351; 2360; 2430
Erh	13877	755542186	XP_011242297.1	enhancer of rudimentary homolog isoform X1 [Mus musculus]	8	1	[R].RQAQQAGK.[-]	RQAQQAGk	[K8](Biotin)	556.785	2	145	1	RQAQQAGk	755542186	1	1	0	0	1	1	0	0	582985	88824.6	0	0				145
Nfrkb	235134	568959267	XP_006510281.1	nuclear factor related to kappa-B-binding protein isoform X1 [Mus musculus]	81	1	[K].SVVTAPIIKGNLGANLSGLGR.[N]	SVVTAPIIkGNLGANLSGLGR	[K9](Biotin)	755.092	3	1216	1	VVTAPIIkGNLGANL	568959267	1	0	0	0	1	0	0	0	351138	0	0	0				1216
Lmnb1	16906	188219589	NP_034851.2	lamin-B1 [Mus musculus]	38	1	[R].LAVYIDKVR.[S]	LAVYIDkVR	[K7](Biotin)	651.866	2	50	1	RLAVYIDkVRSLETE	188219589	0	0	1	1	0	0	1	1	0	0	1.28617e+06	382303	50; 272; 390; 529; 533	7	5
Lmnb1	16906	188219589	NP_034851.2	lamin-B1 [Mus musculus]	38	2	[R].LKLSPSPSSR.[VI]	LkLSPSPSSR	[K2](Biotin)	649.351	2	390	1	EGEEERLkLSPSPSS	188219589	0	0	1	0	0	0	1	0	0	0	418565	0	50; 272; 390; 529; 533	7	5
Lmnb1	16906	188219589	NP_034851.2	lamin-B1 [Mus musculus]	38	1	[K].NQNSWGTGEDVKVILK.[N]	NQNSWGTGEDVkVILK	[K12](Biotin)	672.006	3	529	1	WGTGEDVkVILKNSQ	188219589	0	0	1	0	0	0	1	0	0	0	163628	0	50; 272; 390; 529; 533	7	5
Lmnb1	16906	188219589	NP_034851.2	lamin-B1 [Mus musculus]	38	1	[R].LYKEELEQTYHAKLENAR.[L]	LYKEELEQTYHAkLENAR	[K13](Biotin)	616.061	4	272	2	LEQTYHAkLENARLS	188219589	0	0	1	1	0	0	1	1	0	0	2.62159e+06	2243967	50; 272; 390; 529; 533	7	5
Lmnb1	16906	188219589	NP_034851.2	lamin-B1 [Mus musculus]	38	1	[K].VILKNSQGEEVAQR.[S]	VILkNSQGEEVAQR	[K4](Biotin)	599.646	3	533	1	EDVKVILkNSQGEEV	188219589	0	0	0	1	0	0	0	1	0	0	0	0	50; 272; 390; 529; 533	7	5
Hnrnpa2b1	53379	755517048	XP_006506436.2	heterogeneous nuclear ribonucleoproteins A2/B1 isoform X1 [Mus musculus]	19	1	[-].MEKTLETVPLER.[K]	MEkTLETVPLER	[K3](Biotin)	857.432	2	3	1	MEkTLETVPL	755517048	1	1	0	0	2	1	0	0	275424	21949	0	0				3
Matr3	17184	25141233	NP_034901.2	matrin-3 [Mus musculus]	66	1	[R].IGPYQPNVPVGIDYVIPKTGFYCK.[L]	IGPYQPNVPVGIDYVIPkTGFYCK	[K18](Biotin)	984.505	3	797	1	GIDYVIPkTGFYCKL	25141233	1	0	0	0	1	0	0	0	69490.4	0	0	0				797
Poldip3	73826	30519969	NP_848742.1	polymerase delta-interacting protein 3 [Mus musculus]	37	1	[K].ALPLTKVVQNDAYTAPVLPSSVR.[T]	ALPLTkVVQNDAYTAPVLPSSVR	[K6](Biotin)	889.153	3	229	1	SKALPLTkVVQNDAY	30519969	1	0	0	0	1	0	0	0	92445.9	0	0	0				229
Prpf40a	56194	9055218	NP_061255.1	pre-mRNA-processing factor 40 homolog A [Mus musculus]	101	1	[K].ELEDLEGYQNTIVAGGLITKSNLHAMIK.[A]	ELEDLEGYQNTIVAGGLITkSNLHAMIK	[K20](Biotin)	1095.23	3	233	1	VAGGLITkSNLHAMI	9055218	1	0	0	0	1	0	0	0	165521	0	0	0				205; 233
Prpf40a	56194	9055218	NP_061255.1	pre-mRNA-processing factor 40 homolog A [Mus musculus]	101	1	[K].SDSGKPYYYNSQTKESR.[W]	SDSGKPYYYNSQTkESR	[K14](Biotin)	746.006	3	205	1	YYYNSQTkESRWAKP	9055218	1	1	0	0	1	1	0	0	253214	38645	0	0				205; 233
Ddx42	72047	568975951	XP_006534344.1	ATP-dependent RNA helicase DDX42 isoform X1 [Mus musculus]	63	1	[K].SAPPQLPSFYKIGSK.[R]	SAPPQLPSFYkIGSK	[K11](Biotin)	615.991	3	61	1	PQLPSFYkIGSKRAN	568975951	1	0	0	0	1	0	0	0	65169.7	0	0	0				61
Atrx	22589	755565325	XP_011245864.1	transcriptional regulator ATRX isoform X4 [Mus musculus]	275	1	[-].MTAEPMSGNKLSTLVQK.[L]	MTAEPMSGNkLSTLVQK	[K10](Biotin)	701.681	3	10	1	AEPMSGNkLSTLVQK	755565325	1	0	0	0	2	0	0	0	414935	0	0	0				10; 460; 560; 576
Atrx	22589	755565325	XP_011245864.1	transcriptional regulator ATRX isoform X4 [Mus musculus]	275	1	[K].VRKELFVK.[L]	VRkELFVK	[K3](Biotin)	415.578	3	576	2	KVTAKVRkELFVKLT	755565325	1	0	0	0	1	0	0	0	350834	0	0	0				10; 460; 560; 576
Atrx	22589	755565325	XP_011245864.1	transcriptional regulator ATRX isoform X4 [Mus musculus]	275	1	[R].EFLKLDAR.[S]	EFLkLDAR	[K4](Biotin)	609.321	2	460	1	TEKREFLkLDARSSV	755565325	1	0	0	0	1	0	0	0	203641	0	0	0				10; 460; 560; 576
Atrx	22589	755565325	XP_011245864.1	transcriptional regulator ATRX isoform X4 [Mus musculus]	275	1	[K].LNVSSKDSR.[G]	LNVSSkDSR	[K6](Biotin)	616.309	2	560	1	VKLNVSSkDSRGNIK	755565325	1	0	0	0	1	0	0	0	0	0	0	0				10; 460; 560; 576
Mybbp1a	18432	31982724	NP_058056.2	myb-binding protein 1A [Mus musculus]	106	1	[R].KSPHPQSALPK.[K]	kSPHPQSALPK	[K1](Biotin)	472.587	3	1302	1	STKEVIRkSPHPQSA	31982724	1	1	0	0	1	1	0	0	710598	90805.9	0	0				1297; 1302
Mybbp1a	18432	31982724	NP_058056.2	myb-binding protein 1A [Mus musculus]	106	1	[K].KHHQEALSTKEVIR.[K]	KHHQEALSTkEVIR	[K10](Biotin)	634.674	3	1297	2	HQEALSTkEVIRKSP	31982724	1	1	0	0	2	2	0	0	1.3091e+06	159350	0	0				1297; 1302
Mybbp1a	18432	31982724	NP_058056.2	myb-binding protein 1A [Mus musculus]	106	1	[K].KHHQEALSTKEVIRK.[S]	KHHQEALSTkEVIRK	[K10](Biotin)	508.279	4	1297	3	HQEALSTkEVIRKSP	31982724	1	0	0	0	1	0	0	0	106784	0	0	0				1297; 1302
Mybbp1a	18432	31982724	NP_058056.2	myb-binding protein 1A [Mus musculus]	106	1	[K].HHQEALSTKEVIR.[K]	HHQEALSTkEVIR	[K9](Biotin)	591.974	3	1297	1	HQEALSTkEVIRKSP	31982724	1	0	0	0	1	0	0	0	227988	0	0	0				1297; 1302
Esf1	66580	568918050	XP_006500074.1	ESF1 homolog isoform X1 [Mus musculus]	127	1	[K].HFNYDKIVEHQNLSK.[K]	HFNYDkIVEHQNLSK	[K6](Biotin)	700.012	3	721	1	KKHFNYDkIVEHQNL	568918050	1	1	0	1	1	3	0	1	2689451	456614	0	312454	721	1	1	721
Esf1	66580	568918050	XP_006500074.1	ESF1 homolog isoform X1 [Mus musculus]	127	1	[K].HFNYDKIVEHQNLSKK.[K]	HFNYDkIVEHQNLSKK	[K6](Biotin)	557.284	4	721	2	KKHFNYDkIVEHQNL	568918050	1	1	0	0	1	1	0	0	697009	67811.7	0	0	721	1	1	721
Dhx9	13211	755493774	XP_011246220.1	ATP-dependent RNA helicase A isoform X1 [Mus musculus]	65	1	[R].GANLKDYYSR.[K]	GANLkDYYSR	[K5](Biotin)	706.835	2	149	1	WDRGANLkDYYSRKE	755493774	1	0	0	0	1	0	0	0	495569	0	0	0				149
LOC105243690	105243690	755490560	XP_011236511.1	nucleophosmin-like [Mus musculus]	26	1	[K].VKLDEDDEDDDEDDEDDDDDDFDEEETEEKVPVK.[K]	VKLDEDDEDDDEDDEDDDDDDFDEEETEEkVPVk	[K30; K34](Biotin)	1125.19	4	62; 66	2	DEEETEEkVPVKKSV; TEEKVPVkKSVRDTP	755490560	0	0	2	2	0	0	1	1	0	0	295534	0	62; 66; 75; 85	4	4	75; 85; 95; 120; 135; 139; 145
LOC105243690	105243690	755490560	XP_011236511.1	nucleophosmin-like [Mus musculus]	26	2	[R].DTPAKNAQK.[S]	DTPAkNAQK	[K5](Biotin)	599.799	2	75	1	SVRDTPAkNAQKSNQ	755490560	1	0	0	1	1	0	0	1	426556	0	0	78672.8	62; 66; 75; 85	4	4	75; 85; 95; 120; 135; 139; 145
LOC105243690	105243690	755490560	XP_011236511.1	nucleophosmin-like [Mus musculus]	26	2	[R].SKGQESFK.[K]	SkGQESFK	[K2](Biotin)	568.774	2	95	1	KPSTPRSkGQESFKK	755490560	1	1	0	0	1	1	0	0	815818	86889.7	0	0	62; 66; 75; 85	4	4	75; 85; 95; 120; 135; 139; 145
LOC105243690	105243690	755490560	XP_011236511.1	nucleophosmin-like [Mus musculus]	26	2	[K].SNQNGKDLKPSTPR.[S]	SNQNGkDLKPSTPR	[K6](Biotin)	589.965	3	85	1	QKSNQNGkDLKPSTP	755490560	0	1	1	0	0	1	1	0	0	174719	205428	0	62; 66; 75; 85	4	4	75; 85; 95; 120; 135; 139; 145
LOC105243690	105243690	755490560	XP_011236511.1	nucleophosmin-like [Mus musculus]	26	2	[K].TPKGPSSVEDIKAK.[M]	TPKGPSSVEDIkAK	[K12](Biotin)	561.631	3	120	2	PSSVEDIkAKMQASI	755490560	0	1	0	0	0	1	0	0	0	146156	0	0	62; 66; 75; 85	4	4	75; 85; 95; 120; 135; 139; 145
LOC105243690	105243690	755490560	XP_011236511.1	nucleophosmin-like [Mus musculus]	26	2	[K].GPSSVEDIKAK.[M]	GPSSVEDIKAK	[K](Biotin)			X	1
LOC105243690	105243690	755490560	XP_011236511.1	nucleophosmin-like [Mus musculus]	26	1	[K].MQASIEKGGSLPKVEAK.[F]	MQASIEKGGSLPkVEAK	[K13](Biotin)	667.017	3	135	2	EKGGSLPkVEAKFIN	755490560	1	0	0	0	1	0	0	0	514526	0	0	0	62; 66; 75; 85	4	4	75; 85; 95; 120; 135; 139; 145
LOC105243690	105243690	755490560	XP_011236511.1	nucleophosmin-like [Mus musculus]	26	1	[K].GGSLPKVEAKFINYVK.[N]	GGSLPKVEAkFINYVK	[K10](Biotin)	659.361	3	139	2	SLPKVEAkFINYVKN	755490560	1	0	0	0	1	0	0	0	201989	0	0	0	62; 66; 75; 85	4	4	75; 85; 95; 120; 135; 139; 145
LOC105243690	105243690	755490560	XP_011236511.1	nucleophosmin-like [Mus musculus]	26	1	[K].FINYVKNCFR.[M]	FINYVkNCFR	[K6](Biotin)	793.885	2	145	1	AKFINYVkNCFRMTD	755490560	1	1	0	0	1	1	0	0	109926	53233.6	0	0	62; 66; 75; 85	4	4	75; 85; 95; 120; 135; 139; 145
Seh1l	72124	569004573	XP_006526341.1	nucleoporin SEH1 isoform X1 [Mus musculus]	19	1	[R].TAAVWEEIVGESNDKLR.[G]	TAAVWEEIVGESNDkLR	[K15](Biotin)	715.02	3	96	1	IVGESNDkLRGQSHW	569004573	0	0	1	0	0	0	1	0	0	0	103489	0	96	1	1
Anln	68743	568960015	XP_006510644.1	actin-binding protein anillin isoform X1 [Mus musculus]	85	1	[R].FKETERPSIKQVIVR.[K]	FKETERPSIkQVIVR	[K10](Biotin)	514.79	4	685	2	ETERPSIkQVIVRKE	568960015	1	0	0	0	1	0	0	0	83962.7	0	0	0				685
Rpl4	67891	30794450	NP_077174.1	60S ribosomal protein L4 [Mus musculus]	56	1	[K].KLEAAATALATKSEK.[V]	KLEAAATALATkSEK	[K12](Biotin)	586.655	3	364	2	AATALATkSEKVVPE	30794450	0	0	1	0	0	0	1	0	0	0	144651	0	364	1	1
Srrm2	75956	569001947	XP_006525139.1	serine/arginine repetitive matrix protein 2 isoform X1 [Mus musculus]	137	1	[K].TKPDSSIYPLVDSKSFLVQSR.[L]	TKPDSSIYPLVDSkSFLVQSR	[K14](Biotin)	865.118	3	1116	1	IYPLVDSkSFLVQSR	569001947	1	1	0	0	1	1	0	0	2764654	304932	0	0				1116; 1130; 1172
Srrm2	75956	569001947	XP_006525139.1	serine/arginine repetitive matrix protein 2 isoform X1 [Mus musculus]	137	2	[KR].VLLKER.[ES]	VLLkER	[K4](Biotin)	492.289	2	1172	1	VTPRVLLkERSGAGS	569001947	0	1	0	0	0	1	0	0	0	113442	0	0				1116; 1130; 1172
Srrm2	75956	569001947	XP_006525139.1	serine/arginine repetitive matrix protein 2 isoform X1 [Mus musculus]	137	1	[R].LEPSELKER.[L]	LEPSELkER	[K7](Biotin)	663.84	2	1130	1	RLEPSELkERLGLIQ	569001947	1	0	0	0	1	0	0	0	807290	0	0	0				1116; 1130; 1172
Top2a	21973	568973595	XP_006533216.1	DNA topoisomerase 2-alpha isoform X1 [Mus musculus]	175	1	[R].AISKGATSKK.[A]	AISkGATSKK	[K4](Biotin)	406.228	3	1480	2	DFERAISkGATSKKA	568973595	1	0	0	0	1	0	0	0	283314	0	0	0				1480
Adnp	11538	851330596	NP_001297015.1	activity-dependent neuroprotector homeobox protein isoform 1 [Mus musculus]	98	1	[R].AKPLMLIAPKPQDKK.[G]	AkPLMLIAPKPQDKK	[K2](Biotin)	476.776	4	266	1	NVVVPRAkPLMLIAP	851330596	1	0	0	0	1	0	0	0	135837	0	0	0				203; 266
Adnp	11538	851330596	NP_001297015.1	activity-dependent neuroprotector homeobox protein isoform 1 [Mus musculus]	98	1	[K].AGEKSLNGAVSLGTNAREECNIHCKR.[C]	AGEkSLNGAVSLGTNAREECNIHCKR	[K4](Biotin)	620.301	5	203	3	YIAKAGEkSLNGAVS	851330596	1	1	0	0	2	2	0	0	2.72923e+06	388895	0	0				203; 266
Adnp	11538	851330596	NP_001297015.1	activity-dependent neuroprotector homeobox protein isoform 1 [Mus musculus]	98	1	[K].AGEKSLNGAVSLGTNAREECNIHCK.[R]	AGEkSLNGAVSLGTNAREECNIHCK	[K4](Biotin)	736.099	4	203	2	YIAKAGEkSLNGAVS	851330596	1	1	0	0	1	1	0	0	546453	58444.1	0	0				203; 266
Adnp	11538	851330596	NP_001297015.1	activity-dependent neuroprotector homeobox protein isoform 1 [Mus musculus]	98	1	[K].AGEKSLNGAVSLGTNAR.[E]	AGEkSLNGAVSLGTNAR	[K4](Biotin)	624.32	3	203	1	YIAKAGEkSLNGAVS	851330596	1	1	0	0	1	1	0	0	744186	56096	0	0				203; 266
Zfp687	78266	27229259	NP_084350.1	zinc finger protein 687 [Mus musculus]	67	1	[K].TMTKSVLGLVPQTLPK.[A]	TMTkSVLGLVPQTLPK	[K4](Biotin)	647.03	3	439	1	TSPKTMTkSVLGLVP	27229259	1	0	0	0	2	0	0	0	353270	0	0	0				397; 439; 1216
Zfp687	78266	27229259	NP_084350.1	zinc finger protein 687 [Mus musculus]	67	1	[R].LKGTVLPVATIQNASTAMLMAASVAR.[K]	LkGTVLPVATIQNASTAMLMAASVAR	[K2](Biotin)	947.514	3	397	1	LGDGTRLkGTVLPVA	27229259	1	0	0	0	1	0	0	0	53208.6	0	0	0				397; 439; 1216
Zfp687	78266	27229259	NP_084350.1	zinc finger protein 687 [Mus musculus]	67	1	[K].SCDSPLNLKTHFR.[T]	SCDSPLNLkTHFR	[K9](Biotin)	600.957	3	1216	1	CDSPLNLkTHFRTHG	27229259	1	1	0	0	1	1	0	0	515111	40920.1	0	0				397; 439; 1216
Pogz	229584	755503733	XP_011238393.1	pogo transposable element with ZNF domain isoform X1 [Mus musculus]	71	1	[R].VFDWSMKNTYLPPPLVPNK.[A]	VFDWSMkNTYLPPPLVPNK	[K7](Biotin)	824.754	3	867	1	RVFDWSMkNTYLPPP	755503733	1	1	0	0	4	2	0	0	4.44913e+06	190905	0	0				867
Pogz	229584	755503733	XP_011238393.1	pogo transposable element with ZNF domain isoform X1 [Mus musculus]	71	1	[R].VFDWSMKNTYLPPPLVPNK.[A]	VFDWSMkNTYLPPPLVPNK	[K7](Biotin)	824.754	3	867	1	RVFDWSMkNTYLPPP	755503733	1	1	0	0	4	2	0	0	4.44913e+06	190905	0	0				867
Nup107	103468	29789351	NP_598771.1	nuclear pore complex protein Nup107 [Mus musculus]	49	1	[K].HMNSAPQKPTLLSQATFTEKVAYEHR.[E]	HMNSAPQKPTLLSQATFTEkVAYEHR	[K20](Biotin)	642.923	5	786	1	SQATFTEkVAYEHRE	29789351	0	0	1	1	0	0	1	1	0	0	835260	522794	786	2	1
Rrs1	59014	227908779	NP_067486.2	ribosome biogenesis regulatory protein homolog [Mus musculus]	43	1	[R].AHKMQMPSSAGLHPTGHQSKEELGR.[A]	AHkMQMPSSAGLHPTGHQSKEELGR	[K3](Biotin)	735.857	4	198	2	RNLARAHkMQMPSSA	227908779	1	1	1	1	2	2	1	1	3441729	363228	77870.9	97797.2	198	2	1	198
Wdr18	216156	83649741	NP_780659.2	WD repeat-containing protein 18 [Mus musculus]	16	1	[R].IITRPSK.[-]	IITRPSk	[K7](Biotin)	520.8	2	431	0	RIITRPSk	83649741	1	0	0	0	1	0	0	0	1099178	0	0	0				431
Whsc1	107823	295424164	NP_001074571.2	histone-lysine N-methyltransferase NSD2 isoform 1 [Mus musculus]	134	1	[R].KSPLSVQKVVK.[C]	KSPLSVQkVVK	[K8](Biotin)	480.287	3	14	2	KSPLSVQkVVKCMKM	295424164	1	0	0	0	1	0	0	0	1.23645e+06	0	0	0				14
Whsc1	107823	295424164	NP_001074571.2	histone-lysine N-methyltransferase NSD2 isoform 1 [Mus musculus]	134	1	[K].FNGHDALPFLPAEKLK.[D]	FNGHDALPFLPAEKLK	[K](Biotin)			X	1
Brd4	57261	569001137	XP_006524749.1	bromodomain-containing protein 4 isoform X2 [Mus musculus]	115	1	[R].HHKSDPYSAGHLR.[E]	HHkSDPYSAGHLR	[K3](Biotin)	433.46	4	1054	1	HPSPRHHkSDPYSAG	569001137	1	1	0	0	1	1	0	0	146086	15549.8	0	0				1054
Nat10	98956	23346561	NP_694766.1	N-acetyltransferase 10 [Mus musculus]	73	1	[K].AIEEQMVAVKDVVMEPTMK.[T]	AIEEQMVAVkDVVMEPTMK	[K10](Biotin)	792.054	3	922	1	EEQMVAVkDVVMEPT	23346561	1	0	0	0	1	0	0	0	150753	0	0	0				88; 922
Nat10	98956	23346561	NP_694766.1	N-acetyltransferase 10 [Mus musculus]	73	1	[K].SGTLNLKQDDPFELFVAATNIR.[Y]	SGTLNLkQDDPFELFVAATNIR	[K7](Biotin)	892.457	3	88	1	KSGTLNLkQDDPFEL	23346561	1	0	0	0	1	0	0	0	0	0	0	0				88; 922
Bclaf1	72567	70906447	NP_001020563.1	bcl-2-associated transcription factor 1 isoform 1 [Mus musculus]	92	2	[K].LKMAPVPLDDSNRPASLTK.[D]	LkMAPVPLDDSNRPASLTK	[K2](Biotin)	760.402	3	548	1	HRPEVKLkMAPVPLD	70906447	1	0	0	0	1	0	0	0	1.2668e+06	0	0	0				333; 419; 460; 548
Bclaf1	72567	70906447	NP_001020563.1	bcl-2-associated transcription factor 1 isoform 1 [Mus musculus]	92	2	[K].SVLADQGKSFATSSHR.[N]	SVLADQGkSFATSSHR	[K8](Biotin)	639.648	3	419	1	SVLADQGkSFATSSH	70906447	0	1	0	0	0	1	0	0	0	35538.9	0	0				333; 419; 460; 548
Bclaf1	72567	70906447	NP_001020563.1	bcl-2-associated transcription factor 1 isoform 1 [Mus musculus]	92	2	[K].TGKFLKR.[F]	TGkFLKR	[K3](Biotin)	359.207	3	333	2	QETAKTGkFLKRFTD	70906447	1	0	0	0	1	0	0	0	626841	0	0	0				333; 419; 460; 548
Bclaf1	72567	70906447	NP_001020563.1	bcl-2-associated transcription factor 1 isoform 1 [Mus musculus]	92	2	[K].TGKFLK.[R]	TGkFLK	[K3](Biotin)	460.258	2	333	1	QETAKTGkFLKRFTD	70906447	1	0	0	0	1	0	0	0	147968	0	0	0				333; 419; 460; 548
Bclaf1	72567	70906447	NP_001020563.1	bcl-2-associated transcription factor 1 isoform 1 [Mus musculus]	92	2	[K].LKETAYIVERPSTAK.[D]	LkETAYIVERPSTAK	[K2](Biotin)	644.681	3	460	1	EEKNYKLkETAYIVE	70906447	1	0	0	0	1	0	0	0	657154	0	0	0				333; 419; 460; 548
Rbm10	236732	269847199	NP_001161248.1	RNA-binding protein 10 isoform 3 [Mus musculus]	49	2	[R].WMEANQHSLNILGQKVSMHYSDPKPK.[I]	WMEANQHSLNILGQkVSMHYSDPKPK	[K15](Biotin)	653.721	5	124	1	SLNILGQkVSMHYSD	269847199	1	1	1	1	2	4	1	1	7.93426e+06	1.76094e+06	1.43791e+06	1.05871e+06	124	4	1	124; 843
Rbm10	236732	269847199	NP_001161248.1	RNA-binding protein 10 isoform 3 [Mus musculus]	49	2	[R].GSSYGVTSTESYKETLHKTMVTR.[F]	GSSYGVTSTESYKETLHkTMVTR	[K18](Biotin)	697.84	4	843	2	SYKETLHkTMVTRFN	269847199	1	1	0	0	1	1	0	0	519118	68558.1	0	0	124	4	1	124; 843
Rbm10	236732	269847199	NP_001161248.1	RNA-binding protein 10 isoform 3 [Mus musculus]	49	2	[R].WMEANQHSLNILGQKVSMHYSDPKPK.[I]	WMEANQHSLNILGQkVSMHYSDPKPK	[K15](Biotin)	653.721	5	124	1	SLNILGQkVSMHYSD	269847199	1	1	1	1	2	4	1	1	7.93426e+06	1.76094e+06	1.43791e+06	1.05871e+06	124	4	1	124; 843
Ccdc12	72654	227496903	NP_082588.2	coiled-coil domain-containing protein 12 [Mus musculus]	18	1	[K].QLREEGEEVGKHR.[G]	QLREEGEEVGkHR	[K11](Biotin)	598.299	3	53	2	EEGEEVGkHRGLRLR	227496903	1	0	0	0	1	0	0	0	0	0	0	0				53
Wdr33	74320	569004614	XP_006526361.1	pre-mRNA 3' end processing protein WDR33 isoform X1 [Mus musculus]	57	1	[K].KKTQAEIEQEMATLQYTNPQLLEQLKIER.[L]	KKTQAEIEQEMATLQYTNPQLLEQLkIER	[K26](Biotin)	925.733	4	560	3	PQLLEQLkIERLAQK	569004614	1	0	0	0	1	0	0	0	690981	0	0	0				560
Wdr33	74320	569004614	XP_006526361.1	pre-mRNA 3' end processing protein WDR33 isoform X1 [Mus musculus]	57	1	[K].TQAEIEQEMATLQYTNPQLLEQLKIER.[L]	TQAEIEQEMATLQYTNPQLLEQLkIER	[K24](Biotin)	1148.58	3	560	1	PQLLEQLkIERLAQK	569004614	1	0	0	0	1	0	0	0	0	0	0	0				560
Bop1	12181	7304931	NP_038509.1	ribosome biogenesis protein BOP1 [Mus musculus]	30	1	[R].KLNFLPQKFPSLR.[T]	kLNFLPQKFPSLR	[K1](Biotin)	605.343	3	325	2	QQEPVERkLNFLPQK	7304931	1	1	0	0	2	1	0	0	611624	0	0	0				325
Plec	18810	254675265	NP_958796.2	plectin isoform 1a [Mus musculus]	262	2	[R].LLASGKVAQR.[A]	LLASGkVAQR	[K6](Biotin)	634.862	2	430	1	IRLLASGkVAQRAGE	254675265	1	1	1	1	1	1	1	1	3.06449e+06	230597	447305	349196	430	2	1	430; 1578; 1585; 2256; 2424; 2490; 2496; 2912; 4468
Plec	18810	254675265	NP_958796.2	plectin isoform 1a [Mus musculus]	262	2	[R].TELATQEKVTLVQTLEIQR.[Q]	TELATQEkVTLVQTLEIQR	[K8](Biotin)	809.438	3	2424	1	TELATQEkVTLVQTL	254675265	1	0	0	0	2	0	0	0	619081	0	0	0	430	2	1	430; 1578; 1585; 2256; 2424; 2490; 2496; 2912; 4468
Plec	18810	254675265	NP_958796.2	plectin isoform 1a [Mus musculus]	262	2	[R].SAEVELQSKR.[A]	SAEVELQSkR	[K9](Biotin)	686.849	2	1578	1	AEVELQSkRASFAEK	254675265	1	1	0	0	1	1	0	0	800302	54648.7	0	0	430	2	1	430; 1578; 1585; 2256; 2424; 2490; 2496; 2912; 4468
Plec	18810	254675265	NP_958796.2	plectin isoform 1a [Mus musculus]	262	2	[K].RASFAEKTAQLER.[T]	RASFAEkTAQLER	[K7](Biotin)	578.298	3	1585	2	KRASFAEkTAQLERT	254675265	1	1	0	0	1	1	0	0	938120	125810	0	0	430	2	1	430; 1578; 1585; 2256; 2424; 2490; 2496; 2912; 4468
Plec	18810	254675265	NP_958796.2	plectin isoform 1a [Mus musculus]	262	2	[R].ASFAEKTAQLER.[T]	ASFAEkTAQLER	[K6](Biotin)	788.893	2	1585	1	KRASFAEkTAQLERT	254675265	1	1	0	0	1	2	0	0	536244	149339	0	0	430	2	1	430; 1578; 1585; 2256; 2424; 2490; 2496; 2912; 4468
Plec	18810	254675265	NP_958796.2	plectin isoform 1a [Mus musculus]	262	2	[R].DKDNTQR.[F]	DkDNTQR	[K2](Biotin)	551.751	2	2256	1	RALILRDkDNTQRFL	254675265	1	0	0	0	1	0	0	0	357701	0	0	0	430	2	1	430; 1578; 1585; 2256; 2424; 2490; 2496; 2912; 4468
Plec	18810	254675265	NP_958796.2	plectin isoform 1a [Mus musculus]	262	2	[K].SFLSEKDSLLQR.[E]	SFLSEkDSLLQR	[K6](Biotin)	550.284	3	2496	1	QKSFLSEkDSLLQRE	254675265	1	0	0	0	1	0	0	0	85060.3	0	0	0	430	2	1	430; 1578; 1585; 2256; 2424; 2490; 2496; 2912; 4468
Plec	18810	254675265	NP_958796.2	plectin isoform 1a [Mus musculus]	262	2	[K].ATVSAPFGKFQGR.[T]	ATVSAPFGkFQGR	[K9](Biotin)	796.405	2	2912	1	TVSAPFGkFQGRTVT	254675265	1	0	0	0	1	0	0	0	408821	0	0	0	430	2	1	430; 1578; 1585; 2256; 2424; 2490; 2496; 2912; 4468
Plec	18810	254675265	NP_958796.2	plectin isoform 1a [Mus musculus]	262	2	[K].LHRTELATQEKVTLVQTLEIQR.[Q]	LHRTELATQEkVTLVQTLEIQR	[K11](Biotin)	708.891	4	2424	2	TELATQEkVTLVQTL	254675265	1	0	0	0	1	0	0	0	309272	0	0	0	430	2	1	430; 1578; 1585; 2256; 2424; 2490; 2496; 2912; 4468
Plec	18810	254675265	NP_958796.2	plectin isoform 1a [Mus musculus]	262	2	[R].LLEAAAQSSKGYYSPYSVSGSGSTAGSR.[T]	LLEAAAQSSkGYYSPYSVSGSGSTAGSR	[K10](Biotin)	1003.14	3	4468	1	EAAAQSSkGYYSPYS	254675265	1	1	0	0	1	1	0	0	1.03233e+06	110479	0	0	430	2	1	430; 1578; 1585; 2256; 2424; 2490; 2496; 2912; 4468
Plec	18810	254675265	NP_958796.2	plectin isoform 1a [Mus musculus]	262	2	[K].SEEMQTVQQEQILQETQALQKSFLSEKDSLLQR.[E]	SEEMQTVQQEQILQETQALQkSFLSEKDSLLQR	[K21](Biotin)	1030.52	4	2490	2	QETQALQkSFLSEKD	254675265	1	0	0	0	1	0	0	0	284220	0	0	0	430	2	1	430; 1578; 1585; 2256; 2424; 2490; 2496; 2912; 4468
Smarcc1	20588	112421097	NP_033237.2	SWI/SNF complex subunit SMARCC1 [Mus musculus]	80	1	[K].KVQEAAR.[A]	kVQEAAR	[K1](Biotin)	514.271	2	739	1	LVEAHVKkVQEAARA	112421097	1	0	0	0	1	0	0	0	824502	0	0	0				739
Lcor	212391	755563036	XP_011245516.1	ligand-dependent corepressor isoform X2 [Mus musculus]	129	1	[K].LCNHHQKQFIR.[V]	LCNHHQkQFIR	[K7](Biotin)	569.617	3	303	1	KLCNHHQkQFIRVLS	755563036	1	0	0	0	2	0	0	0	331154	0	0	0				303
Scaf11	72193	568993404	XP_006521493.1	protein SCAF11 isoform X1 [Mus musculus]	93	1	[K].LAESKVSVR.[V]	LAESkVSVR	[K5](Biotin)	607.832	2	1374	1	AVKLAESkVSVRVEA	568993404	1	0	0	0	1	0	0	0	709329	0	0	0				1133; 1374
Scaf11	72193	568993404	XP_006521493.1	protein SCAF11 isoform X1 [Mus musculus]	93	1	[R].TPLSGSDSFKSAEQQPSKR.[K]	TPLSGSDSFkSAEQQPSKR	[K10](Biotin)	759.37	3	1133	2	LSGSDSFkSAEQQPS	568993404	1	0	0	0	1	0	0	0	0	0	0	0				1133; 1374
Nup98	269966	568950761	XP_006507958.1	nuclear pore complex protein Nup98-Nup96 isoform X1 [Mus musculus]	83	1	[R].FSFLSKPVDENNQQDGEDDSLVSR.[F]	FSFLSkPVDENNQQDGEDDSLVSR	[K6](Biotin)	984.785	3	639	0	ERFSFLSkPVDENNQ	568950761	0	0	1	1	0	0	1	1	0	0	709923	500653	639; 1051	4	2
Nup98	269966	568950761	XP_006507958.1	nuclear pore complex protein Nup98-Nup96 isoform X1 [Mus musculus]	83	1	[R].SIVGGLLQSKFASGTFLSPSASVQECR.[T]	SIVGGLLQSkFASGTFLSPSASVQECR	[K10](Biotin)	763.887	4	1051	1	VGGLLQSkFASGTFL	568950761	0	0	1	0	0	0	2	0	0	0	2.46118e+06	0	639; 1051	4	2
Cux1	13047	601984298	NP_001278162.1	protein CASP isoform c [Mus musculus]	104	1	[R].GSTWKDPWWSPIQPERR.[N]	GSTWkDPWWSPIQPERR	[K5](Biotin)	784.715	3	917	2	LVRGSTWkDPWWSPI	601984298	1	0	0	0	1	0	0	0	223776	0	0	0				917
Tmpo	21917	121949760	NP_035735.2	lamina-associated polypeptide 2 isoform alpha [Mus musculus]	47	3	[K].LLKLREQGTESR.[S]	LLkLREQGTESR	[K3](Biotin)	552.635	3	147	2	LYEKKLLkLREQGTE	121949760	0	0	1	1	0	0	1	2	0	0	395690	604031	15; 17; 34; 97; 100; 106; 147; 241; 262; 267; 288	34	11	34; 262; 288
Tmpo	21917	121949760	NP_035735.2	lamina-associated polypeptide 2 isoform alpha [Mus musculus]	47	3	[K].LKSELVANNVTLPAGEQR.[K]	LkSELVANNVTLPAGEQR	[K2](Biotin)	722.385	3	17	1	VLTKDKLkSELVANN	121949760	0	0	1	1	0	0	1	1	0	0	4765741	2.82471e+06	15; 17; 34; 97; 100; 106; 147; 241; 262; 267; 288	34	11	34; 262; 288
Tmpo	21917	121949760	NP_035735.2	lamina-associated polypeptide 2 isoform alpha [Mus musculus]	47	3	[K].LKSELVANNVTLPAGEQRK.[D]	LkSELVANNVTLPAGEQRK	[K2](Biotin)	1147.12	2	17	2	VLTKDKLkSELVANN	121949760	0	0	1	1	0	0	3	2	0	0	1.84496e+07	1.43806e+07	15; 17; 34; 97; 100; 106; 147; 241; 262; 267; 288	34	11	34; 262; 288
Tmpo	21917	121949760	NP_035735.2	lamina-associated polypeptide 2 isoform alpha [Mus musculus]	47	3	[K].KTDKPR.[L]	kTDkPR	[K1; K4](Biotin)	598.8	2	97; 100	1	VGRKATKkTDKPRLE; KATKKTDkPRLEDKD	121949760	0	0	0	2	0	0	0	1	0	0	0	73545.9	15; 17; 34; 97; 100; 106; 147; 241; 262; 267; 288	34	11	34; 262; 288
Tmpo	21917	121949760	NP_035735.2	lamina-associated polypeptide 2 isoform alpha [Mus musculus]	47	3	[K].KTDKPR.[L]	KTDKPR	[K](Biotin)			X	1
Tmpo	21917	121949760	NP_035735.2	lamina-associated polypeptide 2 isoform alpha [Mus musculus]	47	3	[K].KLLKLR.[CE]	KLLKLR	[K](Biotin)			X	2
Tmpo	21917	121949760	NP_035735.2	lamina-associated polypeptide 2 isoform alpha [Mus musculus]	47	3	[K].TDKPRLEDKDDLDVTELSNEELLDQLVR.[Y]	TDKPRLEDKDDLDVTELSNEELLDQLVR	[K](Biotin)			X	2
Tmpo	21917	121949760	NP_035735.2	lamina-associated polypeptide 2 isoform alpha [Mus musculus]	47	3	[K].DKLKSELVANNVTLPAGEQR.[K]	DKLKSELVANNVTLPAGEQR	[K](Biotin)			X	2
Tmpo	21917	121949760	NP_035735.2	lamina-associated polypeptide 2 isoform alpha [Mus musculus]	47	3	[K].DKLKSELVANNVTLPAGEQRK.[D]	DkLkSELVANNVTLPAGEQRK	[K2; K4](Biotin)	921.482	3	15; 17	3	PSVLTKDkLKSELVA; VLTKDKLkSELVANN	121949760	0	0	2	0	0	0	1	0	0	0	970181	0	15; 17; 34; 97; 100; 106; 147; 241; 262; 267; 288	34	11	34; 262; 288
Tmpo	21917	121949760	NP_035735.2	lamina-associated polypeptide 2 isoform alpha [Mus musculus]	47	3	[K].DKLKSELVANNVTLPAGEQR.[K]	DkLkSELVANNVTLPAGEQR	[K2; K4](Biotin)	878.787	3	15; 17	2	PSVLTKDkLKSELVA; VLTKDKLkSELVANN	121949760	0	0	2	2	0	0	1	2	0	0	1.30107e+06	1.14822e+06	15; 17; 34; 97; 100; 106; 147; 241; 262; 267; 288	34	11	34; 262; 288
Tmpo	21917	121949760	NP_035735.2	lamina-associated polypeptide 2 isoform alpha [Mus musculus]	47	3	[K].DKLKSELVANNVTLPAGEQRK.[D]	DKLKSELVANNVTLPAGEQRK	[K](Biotin)			X	3
Tmpo	21917	121949760	NP_035735.2	lamina-associated polypeptide 2 isoform alpha [Mus musculus]	47	3	[K].KTDKPRLEDKDDLDVTELSNEELLDQLVR.[Y]	KTDKPRLEDKDDLDVTELSNEELLDQLVR	[K](Biotin)			X	3
Tmpo	21917	121949760	NP_035735.2	lamina-associated polypeptide 2 isoform alpha [Mus musculus]	47	3	[R].LEDKDDLDVTELSNEELLDQLVR.[Y]	LEDkDDLDVTELSNEELLDQLVR	[K4](Biotin)	1464.21	2	106	1	DKPRLEDkDDLDVTE	121949760	0	0	1	0	0	0	2	0	0	0	2.00501e+06	0	15; 17; 34; 97; 100; 106; 147; 241; 262; 267; 288	34	11	34; 262; 288
Tmpo	21917	121949760	NP_035735.2	lamina-associated polypeptide 2 isoform alpha [Mus musculus]	47	3	[R].KDVYVQLYLQHLTAR.[N]	kDVYVQLYLQHLTAR	[K1](Biotin)	691.704	3	34	1	LPAGEQRkDVYVQLY	121949760	0	1	1	1	0	2	4	6	0	158105	8.1752e+07	1.37083e+08	15; 17; 34; 97; 100; 106; 147; 241; 262; 267; 288	34	11	34; 262; 288
Tmpo	21917	121949760	NP_035735.2	lamina-associated polypeptide 2 isoform alpha [Mus musculus]	47	4	[R].KLYEKK.[IL]	KLYEKK	[K](Biotin)			X	2
Tmpo	21917	121949760	NP_035735.2	lamina-associated polypeptide 2 isoform alpha [Mus musculus]	47	1	[K].KVQTTK.[R]	kVQTTK	[K1](Biotin)	465.757	2	241	1	TELQAAKkVQTTKRD	121949760	0	0	1	0	0	0	1	0	0	0	348471	0	15; 17; 34; 97; 100; 106; 147; 241; 262; 267; 288	34	11	34; 262; 288
Tmpo	21917	121949760	NP_035735.2	lamina-associated polypeptide 2 isoform alpha [Mus musculus]	47	1	[K].RDPPRETCTDTALPGKGQTHK.[L]	RDPPRETCTDTALPGkGQTHK	[K16](Biotin)	648.568	4	262	3	TDTALPGkGQTHKLA	121949760	1	0	1	1	1	0	1	1	869026	0	550202	616788	15; 17; 34; 97; 100; 106; 147; 241; 262; 267; 288	34	11	34; 262; 288
Tmpo	21917	121949760	NP_035735.2	lamina-associated polypeptide 2 isoform alpha [Mus musculus]	47	1	[R].CVEKSSSPSSQR.[E]	CVEkSSSPSSQR	[K4](Biotin)	789.358	2	288	1	SYDRCVEkSSSPSSQ	121949760	1	1	1	0	1	1	1	0	732364	84911.4	442310	0	15; 17; 34; 97; 100; 106; 147; 241; 262; 267; 288	34	11	34; 262; 288
Tmpo	21917	121949760	NP_035735.2	lamina-associated polypeptide 2 isoform alpha [Mus musculus]	47	1	[R].ETCTDTALPGKGQTHK.[L]	ETCTDTALPGkGQTHK	[K11](Biotin)	657.309	3	262	1	TDTALPGkGQTHKLA	121949760	1	0	0	0	1	0	0	0	152536	0	0	0	15; 17; 34; 97; 100; 106; 147; 241; 262; 267; 288	34	11	34; 262; 288
Tmpo	21917	121949760	NP_035735.2	lamina-associated polypeptide 2 isoform alpha [Mus musculus]	47	1	[R].CVEKSSSPSSQREFAAR.[L]	CVEkSSSPSSQREFAAR	[K4](Biotin)	718.004	3	288	2	SYDRCVEkSSSPSSQ	121949760	1	0	1	0	1	0	1	0	0	0	0	0	15; 17; 34; 97; 100; 106; 147; 241; 262; 267; 288	34	11	34; 262; 288
Tmpo	21917	121949760	NP_035735.2	lamina-associated polypeptide 2 isoform alpha [Mus musculus]	47	1	[R].SLFIPSESSYDRCVEKSSSPSSQR.[E]	SLFIPSESSYDRCVEkSSSPSSQR	[K16](Biotin)	987.121	3	288	2	SYDRCVEkSSSPSSQ	121949760	0	0	1	0	0	0	1	0	0	0	0	0	15; 17; 34; 97; 100; 106; 147; 241; 262; 267; 288	34	11	34; 262; 288
Tmpo	21917	121949760	NP_035735.2	lamina-associated polypeptide 2 isoform alpha [Mus musculus]	47	1	[R].ETCTDTALPGKGQTHKLAPGR.[S]	ETCTDTALPGKGQTHkLAPGR	[K16](Biotin)	616.803	4	267	2	PGKGQTHkLAPGRSL	121949760	0	0	1	0	0	0	1	0	0	0	84506.3	0	15; 17; 34; 97; 100; 106; 147; 241; 262; 267; 288	34	11	34; 262; 288
Baz1b	22385	170295818	NP_035844.2	tyrosine-protein kinase BAZ1B [Mus musculus]	161	1	[K].KYSLPSKFSDFLLDPYKYMTLNPSTK.[R]	KYSLPSKFSDFLLDPYkYMTLNPSTK	[K17](Biotin)	828.17	4	297	3	DFLLDPYkYMTLNPS	170295818	1	0	1	0	1	0	1	0	641759	0	99852.3	0	297	6	1	297; 335
Baz1b	22385	170295818	NP_035844.2	tyrosine-protein kinase BAZ1B [Mus musculus]	161	1	[K].FSDFLLDPYKYMTLNPSTKR.[R]	FSDFLLDPYkYMTLNPSTKR	[K10](Biotin)	888.109	3	297	2	DFLLDPYkYMTLNPS	170295818	1	1	0	1	1	1	0	1	946133	42329.5	0	253118	297	6	1	297; 335
Baz1b	22385	170295818	NP_035844.2	tyrosine-protein kinase BAZ1B [Mus musculus]	161	1	[K].FSDFLLDPYKYMTLNPSTK.[R]	FSDFLLDPYkYMTLNPSTK	[K10](Biotin)	1253.61	2	297	1	DFLLDPYkYMTLNPS	170295818	1	1	1	0	4	2	2	0	1.1552e+07	622771	869625	0	297	6	1	297; 335
Baz1b	22385	170295818	NP_035844.2	tyrosine-protein kinase BAZ1B [Mus musculus]	161	1	[R].DSSSLSSPLNPKLWCHVHLEK.[S]	DSSSLSSPLNPkLWCHVHLEK	[K12](Biotin)	665.83	4	335	1	LSSPLNPkLWCHVHL	170295818	1	1	0	0	2	2	0	0	2.47233e+06	591229	0	0	297	6	1	297; 335
Baz1b	22385	170295818	NP_035844.2	tyrosine-protein kinase BAZ1B [Mus musculus]	161	1	[K].FSDFLLDPYKYMTLNPSTK.[R]	FSDFLLDPYkYMTLNPSTK	[K10](Biotin)	1253.61	2	297	1	DFLLDPYkYMTLNPS	170295818	1	1	1	0	4	2	2	0	1.1552e+07	622771	869625	0	297	6	1	297; 335
Baz1b	22385	170295818	NP_035844.2	tyrosine-protein kinase BAZ1B [Mus musculus]	161	1	[K].RDSSSLSSPLNPKLWCHVHLEK.[S]	RDSSSLSSPLNPkLWCHVHLEK	[K13](Biotin)	704.855	4	335	2	LSSPLNPkLWCHVHL	170295818	1	1	0	0	1	1	0	0	1.13868e+06	175272	0	0	297	6	1	297; 335
Baz1b	22385	170295818	NP_035844.2	tyrosine-protein kinase BAZ1B [Mus musculus]	161	1	[K].YSLPSKFSDFLLDPYKYMTLNPSTK.[R]	YSLPSKFSDFLLDPYKYMTLNPSTK	[K](Biotin)			X	2
Vim	22352	31982755	NP_035831.2	vimentin [Mus musculus]	22	1	[K].ILLAELEQLKGQGKSR.[L]	ILLAELEQLKGQGkSR	[K14](Biotin)	670.38	3	143	2	EQLKGQGkSRLGDLY	31982755	1	0	0	0	1	0	0	0	89426	0	0	0	439; 445	16	2	104; 143; 294; 439; 445
Vim	22352	31982755	NP_035831.2	vimentin [Mus musculus]	22	1	[K].RTLLIKTVETR.[D]	RTLLIkTVETR	[K6](Biotin)	778.453	2	445	2	SKRTLLIkTVETRDG	31982755	1	1	1	1	2	1	1	2	2.09753e+07	85572.7	4.31709e+06	5065025	439; 445	16	2	104; 143; 294; 439; 445
Vim	22352	31982755	NP_035831.2	vimentin [Mus musculus]	22	1	[R].TNEKVELQELNDRFANYIDKVR.[F]	TNEkVELQELNDRFANYIDKVR	[K4](Biotin)	730.871	4	104	3	KNTRTNEkVELQELN	31982755	1	0	0	0	1	0	0	0	221895	0	0	0	439; 445	16	2	104; 143; 294; 439; 445
Vim	22352	31982755	NP_035831.2	vimentin [Mus musculus]	22	1	[R].TLLIKTVETR.[D]	TLLIkTVETR	[K5](Biotin)	700.404	2	445	1	SKRTLLIkTVETRDG	31982755	1	1	1	1	8	13	5	5	1.59361e+08	5.00837e+07	4.91976e+07	3.92355e+07	439; 445	16	2	104; 143; 294; 439; 445
Vim	22352	31982755	NP_035831.2	vimentin [Mus musculus]	22	1	[R].TLLIKTVETRDGQVINETSQHHDDLE.[-]	TLLIkTVETRDGQVINETSQHHDDLE	[K5](Biotin)	805.151	4	445	2	SKRTLLIkTVETRDG	31982755	0	1	0	0	0	2	0	0	0	602008	0	0	439; 445	16	2	104; 143; 294; 439; 445
Vim	22352	31982755	NP_035831.2	vimentin [Mus musculus]	22	1	[R].ETNLESLPLVDTHSKR.[T]	ETNLESLPLVDTHSkR	[K15](Biotin)	689.018	3	439	1	PLVDTHSkRTLLIKT	31982755	1	1	1	1	2	3	1	2	41398512	3.65538e+06	4.46301e+06	1.86597e+06	439; 445	16	2	104; 143; 294; 439; 445
Vim	22352	31982755	NP_035831.2	vimentin [Mus musculus]	22	1	[K].SKFADLSEAANRNNDALR.[Q]	SkFADLSEAANRNNDALR	[K2](Biotin)	740.028	3	294	2	AEEWYKSkFADLSEA	31982755	1	0	0	0	1	0	0	0	236081	0	0	0	439; 445	16	2	104; 143; 294; 439; 445
Sart1	20227	124244096	NP_058578.3	U4/U6.U5 tri-snRNP-associated protein 1 [Mus musculus]	76	1	[R].GLAAALLLCQNKGLLETTVQK.[V]	GLAAALLLCQNkGLLETTVQK	[K12](Biotin)	823.119	3	654	1	ALLLCQNkGLLETTV	124244096	1	0	0	0	1	0	0	0	169357	0	0	0				654; 663
Sart1	20227	124244096	NP_058578.3	U4/U6.U5 tri-snRNP-associated protein 1 [Mus musculus]	76	1	[K].GLLETTVQKVAR.[V]	GLLETTVQkVAR	[K9](Biotin)	514.289	3	663	1	LLETTVQkVARVKAP	124244096	1	1	0	0	1	1	0	0	204523	34873.1	0	0				654; 663
Thrap3	230753	755508129	XP_011238805.1	thyroid hormone receptor-associated protein 3 isoform X1 [Mus musculus]	99	1	[R].SREEEWDPEYTPKSK.[K]	SREEEWDPEYTPKSK	[K](Biotin)			X	2
Thrap3	230753	755508129	XP_011238805.1	thyroid hormone receptor-associated protein 3 isoform X1 [Mus musculus]	99	1	[K].FMSKVIAGASK.[N]	FMSkVIAGASK	[K4](Biotin)	682.858	2	452	1	DEPKFMSkVIAGASK	755508129	1	1	0	0	1	2	0	0	1.94519e+06	221889	0	0				452; 524
Thrap3	230753	755508129	XP_011238805.1	thyroid hormone receptor-associated protein 3 isoform X1 [Mus musculus]	99	1	[K].FMSKVIAGASKNQEEEK.[S]	FMSkVIAGASKNQEEEK	[K4](Biotin)	708.017	3	452	2	DEPKFMSkVIAGASK	755508129	1	1	0	0	1	1	0	0	747333	42754.6	0	0				452; 524
Thrap3	230753	755508129	XP_011238805.1	thyroid hormone receptor-associated protein 3 isoform X1 [Mus musculus]	99	1	[R].VTAYKAVQEK.[S]	VTAYkAVQEK	[K5](Biotin)	681.856	2	524	1	NFRVTAYkAVQEKSS	755508129	1	0	0	0	1	0	0	0	306909	0	0	0				452; 524
Thrap3	230753	755508129	XP_011238805.1	thyroid hormone receptor-associated protein 3 isoform X1 [Mus musculus]	99	1	[R].SREEEWDPEYTPKSKK.[Y]	SREEEWDPEYTPKSKK	[K](Biotin)			X	3
Nes	18008	50363232	NP_057910.3	nestin [Mus musculus]	74	1	[R].IVKPLEKVSQVSLESLEKENVQSPR.[Y]	IVKPLEKVSQVSLESLEKENVQSPR	[K](Biotin)			X	2
Nes	18008	50363232	NP_057910.3	nestin [Mus musculus]	74	1	[R].SLDENQETIVLLESKNQRPLR.[S]	SLDENQETIVLLESkNQRPLR	[K15](Biotin)	903.474	3	855	1	TIVLLESkNQRPLRS	50363232	1	1	0	0	1	2	0	0	661373	132243	0	0				380; 657; 855
Nes	18008	50363232	NP_057910.3	nestin [Mus musculus]	74	1	[R].SSQASLGFPDPKLK.[L]	SSQASLGFPDPKLK	[K](Biotin)			X	1
Nes	18008	50363232	NP_057910.3	nestin [Mus musculus]	74	1	[R].SSEEQNLESLITFKEESQYPLGGPEAEDQMLER.[L]	SSEEQNLESLITFkEESQYPLGGPEAEDQMLER	[K14](Biotin)	1003.22	4	657	1	LESLITFkEESQYPL	50363232	1	0	0	0	1	0	0	0	241343	0	0	0				380; 657; 855
Nes	18008	50363232	NP_057910.3	nestin [Mus musculus]	74	1	[K].TQEFLKAR.[T]	TQEFLkAR	[K6](Biotin)	609.819	2	380	1	LKTQEFLkARTPTLA	50363232	1	1	0	0	1	1	0	0	941599	78517.3	0	0				380; 657; 855
Ddx21	56200	72384374	NP_062426.2	nucleolar RNA helicase 2 [Mus musculus]	101	1	[K].ASSKDAIR.[L]	ASSkDAIR	[K4](Biotin)	537.275	2	649	1	EIIKASSkDAIRLLD	72384374	1	1	0	1	1	1	0	1	441057	53290.2	0	0	649	1	1	649
Wdr43	72515	755559096	XP_011244946.1	WD repeat-containing protein 43 isoform X1 [Mus musculus]	53	1	[R].DISNCWAPTVETAITKVK.[T]	DISNCWAPTVETAITKVK	[K](Biotin)			X	1
Asun	71177	133922586	NP_620096.2	protein asunder homolog [Mus musculus]	46	1	[K].ESLTEEDVLNCQKTIYNLVDMER.[K]	ESLTEEDVLNCQkTIYNLVDMER	[K13](Biotin)	1009.14	3	496	1	EDVLNCQkTIYNLVD	133922586	1	0	0	0	1	0	0	0	177649	0	0	0				496
Hist1h1c	50708	9845257	NP_056601.1	histone H1.2 [Mus musculus]	58	1	[K].KPAAAAVTKK.[V]	KPAAAAVTKK	[K](Biotin)			X	1
Hist1h1c	50708	9845257	NP_056601.1	histone H1.2 [Mus musculus]	58	1	[K].SASKAVKPK.[A]	SASkAVKPK	[K4](Biotin)	381.218	3	190	1	KKVKSASkAVKPKAA	9845257	1	1	1	0	1	1	1	0	720906	116624	295426	0	190	1	1	190
Hist2h2bb	319189	68226433	NP_783597.2	histone H2B type 2-B [Mus musculus]	20	3	[R].LAHYNKR.[S]	LAHYNkR	[K6](Biotin)	376.531	3	86	1	SRLAHYNkRSTITSR	68226433	0	0	0	1	0	0	0	1	0	0	0	467668	21; 86; 109	6	3	21; 109; 117
Hist2h2bb	319189	68226433	NP_783597.2	histone H2B type 2-B [Mus musculus]	20	1	[K].KAVTKVQK.[K]	KAVTkVQK	[K5](Biotin)	564.334	2	21	2	GSKKAVTkVQKKDGK	68226433	0	0	1	0	0	0	1	0	0	0	235984	0	21; 86; 109	6	3	21; 109; 117
Hist2h2bb	319189	68226433	NP_783597.2	histone H2B type 2-B [Mus musculus]	20	1	[K].AVTKVQK.[K]	AVTkVQK	[K4](Biotin)	500.286	2	21	1	GSKKAVTkVQKKDGK	68226433	1	1	0	1	1	1	0	1	2198476	244483	0	1169228	21; 86; 109	6	3	21; 109; 117
Hist2h2bb	319189	68226433	NP_783597.2	histone H2B type 2-B [Mus musculus]	20	1	[K].AVTKVQKK.[D]	AVTkVQKK	[K4](Biotin)	564.334	2	21	2	GSKKAVTkVQKKDGK	68226433	1	1	1	1	2	2	1	1	8.98663e+06	1.52123e+06	5307206	5608089	21; 86; 109	6	3	21; 109; 117
Hist2h2bb	319189	68226433	NP_783597.2	histone H2B type 2-B [Mus musculus]	20	3	[R].LLLPGELAKHAVSEGTK.[A]	LLLPGELAkHAVSEGTK	[K9](Biotin)	663.7	3	109	1	LLPGELAkHAVSEGT	68226433	1	1	1	0	1	1	1	0	610497	37995.3	446898	0	21; 86; 109	6	3	21; 109; 117
Hist2h2bb	319189	68226433	NP_783597.2	histone H2B type 2-B [Mus musculus]	20	3	[K].AVTKYTSSK.[-I]	AVTKYTSSK	[K](Biotin)			X	1
Hist2h2bb	319189	68226433	NP_783597.2	histone H2B type 2-B [Mus musculus]	20	3	[K].HAVSEGTKAVTK.[Y]	HAVSEGTkAVTK	[K8](Biotin)	485.253	3	117	1	HAVSEGTkAVTKYTS	68226433	0	1	0	0	0	1	0	0	0	49880.8	0	0	21; 86; 109	6	3	21; 109; 117
Nol8	70930	406353182	NP_001258326.1	nucleolar protein 8 [Mus musculus]	132	1	[K].HGKIVCPNDPR.[F]	HGkIVCPNDPR	[K3](Biotin)	506.915	3	1069	1	IELVKHGkIVCPNDP	406353182	1	1	0	0	2	1	0	0	901348	83948.2	0	0				286; 1069
Nol8	70930	406353182	NP_001258326.1	nucleolar protein 8 [Mus musculus]	132	1	[K].STHPVTAHGTAPSTVNPSKQLLVSSSGTQKPK.[H]	STHPVTAHGTAPSTVNPSkQLLVSSSGTQKPK	[K19](Biotin)	694.562	5	286	1	PSTVNPSkQLLVSSS	406353182	1	0	0	0	1	0	0	0	196290	0	0	0				286; 1069
Hp1bp3	15441	171846285	NP_001116369.1	heterochromatin protein 1-binding protein 3 isoform 1 [Mus musculus]	78	1	[K].ALPLIVGAQLIHADKLGEKAEDTTMPIRR.[A]	ALPLIVGAQLIHADKLGEKAEDTTMPIRR	[K](Biotin)			X	3
Larp7	28036	110665742	NP_613059.2	la-related protein 7 [Mus musculus]	88	1	[R].LAKTQQASQHIR.[F]	LAkTQQASQHIR	[K3](Biotin)	536.287	3	556	1	AEKIRLAkTQQASQH	110665742	1	0	0	0	1	0	0	0	295534	0	0	0				392; 556
Larp7	28036	110665742	NP_613059.2	la-related protein 7 [Mus musculus]	88	1	[K].EYLALQKASMASLKK.[T]	EYLALQkASMASLKK	[K7](Biotin)	636.344	3	392	2	KEYLALQkASMASLK	110665742	1	0	0	0	1	0	0	0	113519	0	0	0				392; 556
Ddx3x	13205	6753620	NP_034158.1	ATP-dependent RNA helicase DDX3X [Mus musculus]	32	1	[R].GKSSFFGDRGSGSR.[G]	GkSSFFGDRGSGSR	[K2](Biotin)	557.594	3	81	2	SRGDSRGkSSFFGDR	6753620	1	0	0	0	1	0	0	0	371536	0	0	0				81
Zfr	22763	568990435	XP_006520120.1	zinc finger RNA-binding protein isoform X1 [Mus musculus]	75	1	[K].TSTPKINFVGGNKLQSTGNKTEDLK.[G]	TSTPkINFVGGNKLQSTGNKTEDLK	[K5](Biotin)	726.628	4	509	3	AKKTSTPkINFVGGN	568990435	1	0	0	0	1	0	0	0	720436	0	0	0				509
Zfr	22763	568990435	XP_006520120.1	zinc finger RNA-binding protein isoform X1 [Mus musculus]	75	1	[K].KTSTPKINFVGGNK.[L]	KTSTPkINFVGGNK	[K6](Biotin)	572.974	3	509	2	AKKTSTPkINFVGGN	568990435	1	1	0	0	1	1	0	0	0	43572	0	0				509
Zbtb33	56805	118442830	NP_001072981.1	transcriptional regulator Kaiso [Mus musculus]	40	1	[R].SKHVMEGQKIITLDTATEIEGLSTGCK.[V]	SKHVMEGQkIITLDTATEIEGLSTGCK	[K9](Biotin)	793.899	4	412	2	KHVMEGQkIITLDTA	118442830	1	1	0	0	2	1	0	0	1.89837e+06	111352	0	0				412
Zbtb33	56805	118442830	NP_001072981.1	transcriptional regulator Kaiso [Mus musculus]	40	1	[K].HVMEGQKIITLDTATEIEGLSTGCK.[V]	HVMEGQkIITLDTATEIEGLSTGCK	[K7](Biotin)	986.487	3	412	1	KHVMEGQkIITLDTA	118442830	1	0	0	0	1	0	0	0	1.11339e+06	0	0	0				412
Zbtb33	56805	118442830	NP_001072981.1	transcriptional regulator Kaiso [Mus musculus]	40	1	[R].SKHVMEGQKIITLDTATEIEGLSTGCK.[V]	SKHVMEGQKIITLDTATEIEGLSTGCK	[K](Biotin)			X	2
Suz12	52615	40353214	NP_954666.1	polycomb protein Suz12 isoform 1 [Mus musculus]	61	1	[R].WTGETNDKSTAPVAKPLATR.[N]	WTGETNDkSTAPVAKPLATR	[K8](Biotin)	790.4	3	370	1	WTGETNDkSTAPVAK	40353214	1	0	0	0	1	0	0	0	179970	0	0	0				370
Myof	226101	569007058	XP_006527057.1	myoferlin isoform X1 [Mus musculus]	146	1	[K].VFLPKEELYMPPLVIK.[V]	VFLPkEELYMPPLVIK	[K5](Biotin)	714.73	3	1365	1	FMKVFLPkEELYMPP	569007058	1	0	1	0	1	0	2	0	470998	0	906320	0	1365	2	1	1365
Hist1h4k	319160	30061359	NP_835583.1	histone H4 [Mus musculus]	11	1	[K].GGKGLGKGGAK.[R]	GGKGLGKGGAK	[K](Biotin)			X	2
Hist1h4k	319160	30061359	NP_835583.1	histone H4 [Mus musculus]	11	1	[R].GKGGKGLGK.[G]	GKGGKGLGK	[K](Biotin)			X	2
Hist1h4k	319160	30061359	NP_835583.1	histone H4 [Mus musculus]	11	1	[K].GGKGLGK.[G]	GGkGLGK	[K3](Biotin)	421.733	2	9	1	SGRGKGGkGLGKGGA	30061359	1	1	0	1	2	1	0	1	24747840	1.56411e+06	0	4844540	9; 13	7	2	9; 13; 21; 92
Hist1h4k	319160	30061359	NP_835583.1	histone H4 [Mus musculus]	11	1	[K].GLGKGGAKR.[H]	GLGkGGAKR	[K4](Biotin)	535.3	2	13	2	KGGKGLGkGGAKRHR	30061359	1	1	1	1	4	2	3	2	119824854	6090962	3.65888e+07	1.62512e+07	9; 13	7	2	9; 13; 21; 92
Hist1h4k	319160	30061359	NP_835583.1	histone H4 [Mus musculus]	11	1	[K].GLGKGGAK.[R]	GLGkGGAK	[K4](Biotin)	457.25	2	13	1	KGGKGLGkGGAKRHR	30061359	0	1	0	1	0	1	0	1	0	1.09397e+06	0	2.87798e+06	9; 13	7	2	9; 13; 21; 92
Hist1h4k	319160	30061359	NP_835583.1	histone H4 [Mus musculus]	11	1	[R].KVLRDNIQGITKPAIR.[R]	kVLRDNIQGITKPAIR	[K1](Biotin)	512.801	4	21	2	GGAKRHRkVLRDNIQ	30061359	1	1	0	0	1	1	0	0	338668	38070.5	0	0	9; 13	7	2	9; 13; 21; 92
Hist1h4k	319160	30061359	NP_835583.1	histone H4 [Mus musculus]	11	1	[K].TVTAMDVVYALKR.[Q]	TVTAMDVVYALkR	[K12](Biotin)	564.965	3	92	1	MDVVYALkRQGRTLY	30061359	1	0	0	0	1	0	0	0	28673.4	0	0	0	9; 13	7	2	9; 13; 21; 92
Acin1	56215	146231985	NP_075679.2	apoptotic chromatin condensation inducer in the nucleus isoform 2 [Mus musculus]	94	1	[R].KISVVSATK.[G]	kISVVSATK	[K1](Biotin)	579.831	2	823	1	MPKSFKRkISVVSAT	146231985	1	0	0	0	1	0	0	0	503181	0	0	0				103; 823; 831; 985
Acin1	56215	146231985	NP_075679.2	apoptotic chromatin condensation inducer in the nucleus isoform 2 [Mus musculus]	94	2	[R].SISQQKSGVSITIDDPVR.[T]	SISQQkSGVSITIDDPVR	[K6](Biotin)	719.374	3	985	1	RRSISQQkSGVSITI	146231985	1	1	0	0	1	1	0	0	707053	0	0	0				103; 823; 831; 985
Acin1	56215	146231985	NP_075679.2	apoptotic chromatin condensation inducer in the nucleus isoform 2 [Mus musculus]	94	1	[R].KISVVSATKGVQAGNSDTEGGQPGR.[K]	KISVVSATkGVQAGNSDTEGGQPGR	[K9](Biotin)	890.45	3	831	2	ISVVSATkGVQAGNS	146231985	1	1	0	0	1	1	0	0	0	31982.1	0	0				103; 823; 831; 985
Acin1	56215	146231985	NP_075679.2	apoptotic chromatin condensation inducer in the nucleus isoform 2 [Mus musculus]	94	1	[R].KISVVSATKGVQAGNSDTEGGQPGRK.[R]	KISVVSATkGVQAGNSDTEGGQPGRK	[K9](Biotin)	700.112	4	831	3	ISVVSATkGVQAGNS	146231985	1	0	0	0	1	0	0	0	353589	0	0	0				103; 823; 831; 985
Acin1	56215	146231985	NP_075679.2	apoptotic chromatin condensation inducer in the nucleus isoform 2 [Mus musculus]	94	2	[R].LKGALMLENLQK.[H]	LkGALMLENLQK	[K2](Biotin)	792.438	2	103	1	SALVKRLkGALMLEN	146231985	1	0	0	0	1	0	0	0	172353	0	0	0				103; 823; 831; 985
Khdrbs1	20218	110626031	NP_035447.3	KH domain-containing, RNA-binding, signal transduction-associated protein 1 [Mus musculus]	25	1	[K].APPARPVKGAYR.[E]	APPARPVkGAYR	[K8](Biotin)	503.61	3	432	1	APPARPVkGAYREHP	110626031	1	0	0	0	1	0	0	0	424387	0	0	0				21; 432
Khdrbs1	20218	110626031	NP_035447.3	KH domain-containing, RNA-binding, signal transduction-associated protein 1 [Mus musculus]	25	1	[R].SCSKDPSGAHPSVR.[L]	SCSkDPSGAHPSVR	[K4](Biotin)	570.928	3	21	1	SSGRSCSkDPSGAHP	110626031	1	1	0	0	1	1	0	0	788812	112085	0	0				21; 432
Khdrbs1	20218	110626031	NP_035447.3	KH domain-containing, RNA-binding, signal transduction-associated protein 1 [Mus musculus]	25	1	[K].APPARPVKGAYREHPYGRY.[-]	APPARPVkGAYREHPYGRY	[K8](Biotin)	483.05	5	432	3	APPARPVkGAYREHP	110626031	1	1	0	0	1	1	0	0	268350	26302	0	0				21; 432
Ptbp1	19205	116517301	NP_001070831.1	polypyrimidine tract-binding protein 1 isoform 1 [Mus musculus]	33	3	[K].YNNDKSR.[D]	YNNDkSR	[K5](Biotin)	561.756	2	270	1	NVKYNNDkSRDYTRP	116517301	1	0	0	0	1	0	0	0	45313.5	0	0	0				270
Fip1l1	66899	568935060	XP_006504327.1	pre-mRNA 3'-end-processing factor FIP1 isoform X1 [Mus musculus]	31	1	[R].FNLFKVQQGR.[T]	FNLFkVQQGR	[K5](Biotin)	488.26	3	234	1	DGRFNLFkVQQGRTG	568935060	1	0	0	0	2	0	0	0	606457	0	0	0				234
Zc3h18	76014	568957777	XP_006531532.1	zinc finger CCCH domain-containing protein 18 isoform X1 [Mus musculus]	81	1	[R].HAKEVLKK.[A]	HAkEVLKK	[K3](Biotin)	393.562	3	365	2	ERGLRHAkEVLKKAT	568957777	1	1	0	0	1	1	0	0	530608	90326.8	0	0				365; 956
Zc3h18	76014	568957777	XP_006531532.1	zinc finger CCCH domain-containing protein 18 isoform X1 [Mus musculus]	81	1	[K].GSSKVTSVPGKATDTATAGTK.[S]	GSSkVTSVPGKATDTATAGTK	[K4](Biotin)	730.708	3	956	2	PQSKGSSkVTSVPGK	568957777	1	0	0	0	1	0	0	0	0	0	0	0				365; 956
Rpl24	68193	18250296	NP_077180.1	60S ribosomal protein L24 [Mus musculus]	27	1	[K].QKIVKPVK.[V]	QkIVKPVK	[K2](Biotin)	389.242	3	141	1	TKAAPKQkIVKPVKV	18250296	0	0	1	0	0	0	1	0	0	0	390370	0	141	1	1	147
Rpl24	68193	18250296	NP_077180.1	60S ribosomal protein L24 [Mus musculus]	27	1	[K].IVKPVKVSAPR.[V]	IVKPVkVSAPR	[K6](Biotin)	473.955	3	147	1	QKIVKPVkVSAPRVG	18250296	0	1	0	0	0	1	0	0	0	28388.1	0	0	141	1	1	147
Ebna1bp2	69072	21312728	NP_081208.1	probable rRNA-processing protein EBP2 [Mus musculus]	45	1	[R].GLLKPGLNVVLEKPK.[K]	GLLkPGLNVVLEKPK	[K4](Biotin)	611.034	3	33	0	AFSRGLLkPGLNVVL	21312728	1	0	0	0	1	0	0	0	193765	0	0	0				33; 209
Ebna1bp2	69072	21312728	NP_081208.1	probable rRNA-processing protein EBP2 [Mus musculus]	45	1	[K].GFSDKLDFLEGDQKPVER.[S]	GFSDkLDFLEGDQKPVER	[K5](Biotin)	769.377	3	209	1	YQKGFSDkLDFLEGD	21312728	1	0	0	0	1	0	0	0	143702	0	0	0				33; 209
Wdr75	73674	83523742	NP_082875.1	WD repeat-containing protein 75 [Mus musculus]	59	1	[K].QLLAEESLPTTPFSFILGKHR.[Q]	QLLAEESLPTTPFSFILGkHR	[K19](Biotin)	870.797	3	700	1	PFSFILGkHRQQQGA	83523742	1	0	0	0	1	0	0	0	148977	0	0	0				700
Rangap1	19387	568991782	XP_006520709.1	ran GTPase-activating protein 1 isoform X1 [Mus musculus]	39	1	[K].LAETLAKTQVAGGQLSFK.[G]	LAETLAkTQVAGGQLSFK	[K7](Biotin)	696.711	3	63	1	KLAETLAkTQVAGGQ	568991782	1	1	1	1	2	1	1	1	554365	107351	658342	234152	63; 502	3	2	63; 463; 502
Rangap1	19387	568991782	XP_006520709.1	ran GTPase-activating protein 1 isoform X1 [Mus musculus]	39	1	[R].LGPKVSVLIVQQTDTSDPEKVVSAFLK.[V]	LGPkVSVLIVQQTDTSDPEKVVSAFLK	[K4](Biotin)	781.934	4	502	2	KLLRLGPkVSVLIVQ	568991782	1	0	1	0	1	0	1	0	162936	0	81343.1	0	63; 502	3	2	63; 463; 502
Rangap1	19387	568991782	XP_006520709.1	ran GTPase-activating protein 1 isoform X1 [Mus musculus]	39	1	[R].KILDPNSGEPAPVLSSPTPTDLSTFLSFPSPEK.[L]	kILDPNSGEPAPVLSSPTPTDLSTFLSFPSPEK	[K1](Biotin)	1232.29	3	463	1	EPATPSRkILDPNSG	568991782	1	0	0	0	1	0	0	0	0	0	0	0	63; 502	3	2	63; 463; 502
Gnl2	230737	240120093	NP_663527.2	nucleolar GTP-binding protein 2 [Mus musculus]	76	1	[R].IQPHNAKVHILDTESFESTFGPK.[S]	IQPHNAkVHILDTESFESTFGPK	[K7](Biotin)	706.104	4	131	1	RIQPHNAkVHILDTE	240120093	1	0	0	0	1	0	0	0	1.13166e+06	0	0	0				131
Snw1	66354	146149191	NP_079783.2	SNW domain-containing protein 1 [Mus musculus]	53	1	[R].YTPSQQGVAFNSGAKQR.[V]	YTPSQQGVAFNSGAkQR	[K15](Biotin)	689.003	3	193	1	VAFNSGAkQRVIRMV	146149191	1	1	0	0	1	1	0	0	470603	42707.5	0	0				95; 153; 193
Snw1	66354	146149191	NP_079783.2	SNW domain-containing protein 1 [Mus musculus]	53	1	[K].MSNALAIQVDPEGKIKYDAIAR.[Q]	MSNALAIQVDPEGkIKYDAIAR	[K14](Biotin)	877.124	3	95	2	IQVDPEGkIKYDAIA	146149191	1	0	0	0	1	0	0	0	408867	0	0	0				95; 153; 193
Snw1	66354	146149191	NP_079783.2	SNW domain-containing protein 1 [Mus musculus]	53	1	[R].VALEKSVSQK.[V]	VALEkSVSQK	[K5](Biotin)	657.858	2	153	1	KTRVALEkSVSQKVA	146149191	1	0	0	0	1	0	0	0	0	0	0	0				95; 153; 193
Dnttip2	99480	24418931	NP_722501.1	deoxynucleotidyltransferase terminal-interacting protein 2 [Mus musculus]	78	1	[K].SLEHKFAVVNVER.[W]	SLEHkFAVVNVER	[K5](Biotin)	585.308	3	366	1	LMKSLEHkFAVVNVE	24418931	1	1	0	0	1	1	0	0	2307852	140355	0	0				317; 361; 366
Dnttip2	99480	24418931	NP_722501.1	deoxynucleotidyltransferase terminal-interacting protein 2 [Mus musculus]	78	1	[K].VINEKDSQR.[S]	VINEkDSQR	[K5](Biotin)	657.828	2	317	1	EEKVINEkDSQRSLS	24418931	1	0	0	0	1	0	0	0	184188	0	0	0				317; 361; 366
Dnttip2	99480	24418931	NP_722501.1	deoxynucleotidyltransferase terminal-interacting protein 2 [Mus musculus]	78	1	[K].ALMKSLEHK.[F]	ALMkSLEHK	[K4](Biotin)	428.226	3	361	1	PDRKALMkSLEHKFA	24418931	1	0	0	0	1	0	0	0	445674	0	0	0				317; 361; 366
Syne1	64009	755532685	XP_011241385.1	nesprin-1 isoform X1 [Mus musculus]	672	2	[K].IKGYQEQIDSLNSKCK.[M]	IKGYQEQIDSLNSkCK	[K14](Biotin)	713.021	3	5796	2	QIDSLNSkCKMLTMK	755532685	0	0	1	1	0	0	1	1	0	0	499254	401259	5796; 8330; 8355; 8374	5	4
Syne1	64009	755532685	XP_011241385.1	nesprin-1 isoform X1 [Mus musculus]	672	1	[R].GAVGLSDVVIPENPEAYVKLTENAIR.[N]	GAVGLSDVVIPENPEAYVkLTENAIR	[K19](Biotin)	994.189	3	8330	1	ENPEAYVkLTENAIR	755532685	0	0	1	0	0	0	1	0	0	0	128332	0	5796; 8330; 8355; 8374	5	4
Syne1	64009	755532685	XP_011241385.1	nesprin-1 isoform X1 [Mus musculus]	672	2	[R].QLDKALDDSR.[F]	QLDkALDDSR	[K4](Biotin)	693.838	2	8355	1	SQMRQLDkALDDSRF	755532685	0	0	1	0	0	0	1	0	0	0	259139	0	5796; 8330; 8355; 8374	5	4
Syne1	64009	755532685	XP_011241385.1	nesprin-1 isoform X1 [Mus musculus]	672	2	[R].SKTPTGPDLDTSYK.[G]	SkTPTGPDLDTSYK	[K2](Biotin)	868.413	2	8374	1	TANILRSkTPTGPDL	755532685	0	0	1	0	0	0	1	0	0	0	306481	0	5796; 8330; 8355; 8374	5	4
Ckap5	75786	568918746	XP_006500406.1	cytoskeleton-associated protein 5 isoform X2 [Mus musculus]	214	1	[R].CEMPELVQHKLDDIFEPVLIPEPKIR.[A]	CEMPELVQHKLDDIFEPVLIPEPkIR	[K24](Biotin)	843.685	4	1531	2	PVLIPEPkIRAVSPH	568918746	1	0	0	0	1	0	0	0	0	0	0	0				1531
Rbm25	67039	568980261	XP_006516228.1	RNA-binding protein 25 isoform X2 [Mus musculus]	88	1	[R].RFPVAPLIPYPLITKEDINAIEMEEDKR.[D]	RFPVAPLIPYPLITkEDINAIEMEEDKR	[K15](Biotin)	881.715	4	279	3	IPYPLITkEDINAIE	568980261	1	0	0	0	1	0	0	0	227028	0	0	0				279
Pabpn1	54196	9506945	NP_062275.1	polyadenylate-binding protein 2 [Mus musculus]	10	1	[R].VTILCDKFSGHPK.[G]	VTILCDkFSGHPK	[K7](Biotin)	576.626	3	203	1	RVTILCDkFSGHPKG	9506945	1	1	1	0	1	1	1	0	1.57601e+06	101472	436647	0	203	1	1	203
Zmynd8	228880	568916742	XP_006499441.1	protein kinase C-binding protein 1 isoform X9 [Mus musculus]	117	1	[R].SSKAGLWSSSEEKR.[A]	SSkAGLWSSSEEKR	[K3](Biotin)	593.29	3	1224	2	KYHSRSSkAGLWSSS	568916742	1	0	0	0	1	0	0	0	383340	0	0	0				443; 448; 877; 1224
Zmynd8	228880	568916742	XP_006499441.1	protein kinase C-binding protein 1 isoform X9 [Mus musculus]	117	1	[K].VKLNFDMTASPKILLSKPLLSGGAGR.[R]	VKLNFDMTASPkILLSKPLLSGGAGR	[K12](Biotin)	735.661	4	443	2	FDMTASPkILLSKPL	568916742	1	0	0	0	1	0	0	0	186372	0	0	0				443; 448; 877; 1224
Zmynd8	228880	568916742	XP_006499441.1	protein kinase C-binding protein 1 isoform X9 [Mus musculus]	117	1	[K].ILLSKPLLSGGAGR.[R]	ILLSkPLLSGGAGR	[K5](Biotin)	804.471	2	448	0	SPKILLSkPLLSGGA	568916742	1	0	0	0	2	0	0	0	242003	0	0	0				443; 448; 877; 1224
Zmynd8	228880	568916742	XP_006499441.1	protein kinase C-binding protein 1 isoform X9 [Mus musculus]	117	1	[K].WHMQKIQR.[Q]	WHMQkIQR	[K5](Biotin)	451.563	3	877	1	SQKWHMQkIQRQQQQ	568916742	1	0	0	0	1	0	0	0	295698	0	0	0				443; 448; 877; 1224
Ik	24010	33468955	NP_036009.1	protein Red [Mus musculus]	65	1	[K].GLDFALLQKVR.[A]	GLDFALLQkVR	[K9](Biotin)	743.415	2	173	1	LDFALLQkVRAEIAS	33468955	1	1	1	0	3	1	1	0	400666	16393.8	70565.9	0	164; 173	2	2	164; 173
Ik	24010	33468955	NP_036009.1	protein Red [Mus musculus]	65	1	[K].FLGGDMEHTHLVKGLDFALLQK.[V]	FLGGDMEHTHLVkGLDFALLQK	[K13](Biotin)	674.6	4	164	1	MEHTHLVkGLDFALL	33468955	1	0	1	0	1	0	1	0	268455	0	90499.7	0	164; 173	2	2	164; 173
Usp7	252870	568995352	XP_006522201.1	ubiquitin carboxyl-terminal hydrolase 7 isoform X1 [Mus musculus]	78	1	[R].YTYLEKAIK.[I]	YTYLEkAIK	[K6](Biotin)	677.859	2	1137	1	SRYTYLEkAIKIHN	568995352	1	0	0	0	1	0	0	0	288219	0	0	0				1137
Usp7	252870	568995352	XP_006522201.1	ubiquitin carboxyl-terminal hydrolase 7 isoform X1 [Mus musculus]	78	1	[R].SRYTYLEKAIK.[I]	SRYTYLEkAIK	[K8](Biotin)	533.286	3	1137	2	SRYTYLEkAIKIHN	568995352	1	0	0	0	1	0	0	0	0	0	0	0				1137
Kmt2b	75410	594542481	NP_001277502.1	histone-lysine N-methyltransferase 2B isoform 1 [Mus musculus]	121	1	[K].RAKVQLFK.[I]	RAkVQLFK	[K3](Biotin)	405.906	3	805	2	FSLLKRAkVQLFKID	594542481	1	1	0	0	1	1	0	0	813054	59697.1	0	0				805; 2195; 2201
Kmt2b	75410	594542481	NP_001277502.1	histone-lysine N-methyltransferase 2B isoform 1 [Mus musculus]	121	1	[R].AKVQLFK.[I]	AkVQLFK	[K2](Biotin)	530.305	2	805	1	FSLLKRAkVQLFKID	594542481	1	1	0	0	1	2	0	0	3.02326e+06	440803	0	0				805; 2195; 2201
Kmt2b	75410	594542481	NP_001277502.1	histone-lysine N-methyltransferase 2B isoform 1 [Mus musculus]	121	1	[K].IILVNKLGQVFVK.[M]	IILVNkLGQVFVK	[K6](Biotin)	566.345	3	2201	1	SKIILVNkLGQVFVK	594542481	1	0	0	0	2	0	0	0	288920	0	0	0				805; 2195; 2201
Kmt2b	75410	594542481	NP_001277502.1	histone-lysine N-methyltransferase 2B isoform 1 [Mus musculus]	121	1	[R].AKVQLFKIDQQQQQK.[V]	AkVQLFKIDQQQQQK	[K2](Biotin)	686.039	3	805	2	FSLLKRAkVQLFKID	594542481	1	0	0	0	1	0	0	0	387223	0	0	0				805; 2195; 2201
Kmt2b	75410	594542481	NP_001277502.1	histone-lysine N-methyltransferase 2B isoform 1 [Mus musculus]	121	1	[R].VLSLGPAPEPPKPATSKIILVNK.[L]	VLSLGPAPEPPKPATSkIILVNK	[K17](Biotin)	865.84	3	2195	1	PPKPATSkIILVNKL	594542481	1	0	0	0	1	0	0	0	144407	0	0	0				805; 2195; 2201
Raly	19383	213417799	NP_001132984.1	RNA-binding protein Raly short isoform [Mus musculus]	22	1	[R].AVPVKRPR.[V]	AVPVkRPR	[K5](Biotin)	383.562	3	130	1	VPRAVPVkRPRVTVP	213417799	1	1	0	0	1	1	0	0	222924	26488.8	0	0				130; 149
Raly	19383	213417799	NP_001132984.1	RNA-binding protein Raly short isoform [Mus musculus]	22	1	[K].TTIPVKLFAR.[S]	TTIPVkLFAR	[K6](Biotin)	686.395	2	149	1	VKTTIPVkLFARSTA	213417799	1	0	0	0	1	0	0	0	126719	0	0	0				130; 149
Tead1	21676	262205246	NP_001160056.1	transcriptional enhancer factor TEF-1 isoform 1 [Mus musculus]	31	1	[R].DFHSKLK.[DV]	DFHSkLK	[K5](Biotin)	367.523	3	114	1	KSRDFHSkLKVTSMD	262205246	1	1	0	0	1	1	0	0	410201	46601.4	0	0				114
Setd2	235626	568963777	XP_006512150.1	histone-lysine N-methyltransferase SETD2 isoform X1 [Mus musculus]	197	1	[K].TIDYPKTLIKEPVDKR.[H]	TIDYPkTLIKEPVDKR	[K6](Biotin)	536.296	4	785	3	VKTIDYPkTLIKEPV	568963777	1	1	0	0	1	1	0	0	1.04764e+06	96381.3	0	0				785
Tfip11	54723	10190660	NP_061253.2	tuftelin-interacting protein 11 [Mus musculus]	63	1	[R].EQKVYYSYSQISHK.[H]	EQkVYYSYSQISHK	[K3](Biotin)	662.652	3	278	1	DMTGREQkVYYSYSQ	10190660	1	1	0	0	1	1	0	0	1.56477e+06	117892	0	0				278
Sin3b	20467	568956372	XP_006530852.1	paired amphipathic helix protein Sin3b isoform X1 [Mus musculus]	67	1	[R].LGTHKMVFIVNSEDYMYR.[R]	LGTHkMVFIVNSEDYMYR	[K5](Biotin)	810.389	3	1021	1	RFRLGTHkMVFIVNS	568956372	1	0	0	0	1	0	0	0	453900	0	0	0				1021
Sin3b	20467	568956372	XP_006530852.1	paired amphipathic helix protein Sin3b isoform X1 [Mus musculus]	67	1	[R].LGTHKMVFIVNSEDYMYRR.[G]	LGTHkMVFIVNSEDYMYRR	[K5](Biotin)	647.067	4	1021	2	RFRLGTHkMVFIVNS	568956372	1	0	0	0	1	0	0	0	365938	0	0	0				1021
Dlg1	13383	568994554	XP_006521824.1	disks large homolog 1 isoform X2 [Mus musculus]	61	1	[R].FEAKIHDLR.[E]	FEAkIHDLR	[K4](Biotin)	452.236	3	556	1	EYSRFEAkIHDLREQ	568994554	1	1	0	0	1	1	0	0	323574	24121.7	0	0				556
Rsl24d1	225215	38348464	NP_941011.1	probable ribosome biogenesis protein RLP24 [Mus musculus]	28	1	[K].EVKQNIHLIR.[A]	EVkQNIHLIR	[K3](Biotin)	492.609	3	128	1	VQDIKEVkQNIHLIR	38348464	1	0	0	0	1	0	0	0	677808	0	0	0				128
Safb	224903	569000056	XP_006524223.1	scaffold attachment factor B1 isoform X1 [Mus musculus]	59	1	[K].TELHGKMISVEK.[A]	TELHGkMISVEK	[K6](Biotin)	533.274	3	497	1	HKTELHGkMISVEKA	569000056	1	1	0	0	1	1	0	0	0	137527	0	0				458; 497; 592; 600
Safb	224903	569000056	XP_006524223.1	scaffold attachment factor B1 isoform X1 [Mus musculus]	59	1	[K].CISHLHKTELHGKMISVEK.[A]	CISHLHKTELHGkMISVEK	[K13](Biotin)	619.068	4	497	2	HKTELHGkMISVEKA	569000056	1	0	0	0	1	0	0	0	145421	0	0	0				458; 497; 592; 600
Safb	224903	569000056	XP_006524223.1	scaffold attachment factor B1 isoform X1 [Mus musculus]	59	1	[K].VVGAKVVTNAR.[S]	VVGAkVVTNAR	[K5](Biotin)	670.38	2	458	1	YGKVVGAkVVTNARS	569000056	1	0	0	0	1	0	0	0	187898	0	0	0				458; 497; 592; 600
Safb	224903	569000056	XP_006524223.1	scaffold attachment factor B1 isoform X1 [Mus musculus]	59	1	[K].SKGVPVISVK.[T]	SkGVPVISVK	[K2](Biotin)	620.36	2	592	1	TVVMDKSkGVPVISV	569000056	1	0	0	0	1	0	0	0	221930	0	0	0				458; 497; 592; 600
Safb	224903	569000056	XP_006524223.1	scaffold attachment factor B1 isoform X1 [Mus musculus]	59	1	[K].GVPVISVKTSGSKER.[A]	GVPVISVkTSGSKER	[K8](Biotin)	590.656	3	600	2	GVPVISVkTSGSKER	569000056	1	0	0	0	1	0	0	0	144332	0	0	0				458; 497; 592; 600
Zfp148	22661	755553520	XP_011244190.1	zinc finger protein 148 isoform X2 [Mus musculus]	62	1	[-].MNIDDKLEGLFLKCGGIDEMQSSR.[A]	MNIDDKLEGLFLkCGGIDEMQSSR	[K13](Biotin)	1008.81	3	13	2	KLEGLFLkCGGIDEM	755553520	1	0	0	0	1	0	0	0	227441	0	0	0				13
Noc3l	57753	188497644	NP_067290.2	nucleolar complex protein 3 homolog [Mus musculus]	95	1	[K].DLGQKASFLTR.[D]	DLGQkASFLTR	[K5](Biotin)	731.379	2	106	1	LMKDLGQkASFLTRD	188497644	1	0	0	0	1	0	0	0	156532	0	0	0				106
Ckap4	216197	62526118	NP_780660.1	cytoskeleton-associated protein 4 [Mus musculus]	38	1	[K].GGHGAASPSDKGAHPSGGADDVAK.[K]	GGHGAASPSDkGAHPSGGADDVAK	[K11](Biotin)	791.361	3	21	1	GAASPSDkGAHPSGG	62526118	0	0	1	1	0	0	1	1	0	0	212575	0	21; 35	4	2
Ckap4	216197	62526118	NP_780660.1	cytoskeleton-associated protein 4 [Mus musculus]	38	1	[R].GSKGGHGAASPSDKGAHPSGGADDVAK.[K]	GSKGGHGAASPSDkGAHPSGGADDVAK	[K14](Biotin)	661.809	4	21	2	GAASPSDkGAHPSGG	62526118	0	0	1	0	0	0	1	0	0	0	31016.8	0	21; 35	4	2
Ckap4	216197	62526118	NP_780660.1	cytoskeleton-associated protein 4 [Mus musculus]	38	1	[K].KPPAAPQQPQPPAPHPPQHPQNQAHR.[G]	kPPAAPQQPQPPAPHPPQHPQNQAHR	[K1](Biotin)	616.315	5	35	0	GADDVAKkPPAAPQQ	62526118	0	0	1	0	0	0	1	0	0	0	36520.2	0	21; 35	4	2
Nop58	55989	120407050	NP_061356.2	nucleolar protein 58 [Mus musculus]	72	1	[R].KISGTGKALAK.[A]	KISGTGkALAK	[K7](Biotin)	433.92	3	411	2	RKISGTGkALAKAEK	120407050	1	0	0	0	1	0	0	0	215466	0	0	0				411
Chd4	107932	568940125	XP_006505343.1	chromodomain-helicase-DNA-binding protein 4 isoform X1 [Mus musculus]	176	1	[R].LLDRNQDETEDTELQGMNEYLSSFKVAQYVVR.[E]	LLDRNQDETEDTELQGMNEYLSSFkVAQYVVR	[K25](Biotin)	1004.98	4	1281	2	NEYLSSFkVAQYVVR	568940125	1	0	0	0	1	0	0	0	0	0	0	0				1281
Cbx5	12419	116008461	NP_001070257.1	chromobox protein homolog 5 [Mus musculus]	29	1	[R].LTWHAYPEDAENKEKESAKS.[-]	LTWHAYPEDAENKEKESAkS	[K19](Biotin)	640.553	4	190	3	NKEKESAkS	116008461	1	0	1	0	1	0	1	0	360565	0	258220	0	190	1	1	190
Snrpc	20630	6755596	NP_035562.1	U1 small nuclear ribonucleoprotein C [Mus musculus]	8	1	[K].WMEEQAQSLIDKTTAAFQQGK.[I]	WMEEQAQSLIDkTTAAFQQGK	[K12](Biotin)	879.422	3	52	1	QAQSLIDkTTAAFQQ	6755596	1	0	0	0	1	0	0	0	417355	0	0	0				52
Lyar	17089	568933823	XP_006503825.1	cell growth-regulating nucleolar protein isoform X1 [Mus musculus]	66	1	[K].YGGKGYEAK.[T]	YGGkGYEAK	[K4](Biotin)	599.782	2	61	1	EGQKYGGkGYEAKTH	568933823	1	0	0	0	1	0	0	0	184149	0	0	0				61
Psip1	101739	19527168	NP_598709.1	PC4 and SFRS1-interacting protein isoform 1 [Mus musculus]	83	1	[R].KGFNEGLWEIDNNPKVK.[F]	KGFNEGLWEIDNNPKVK	[K](Biotin)			X	2
Psip1	101739	19527168	NP_598709.1	PC4 and SFRS1-interacting protein isoform 1 [Mus musculus]	83	1	[K].VVKQPCPSDGDMVIDEDKSK.[K]	VVkQPCPSDGDMVIDEDKSK	[K3](Biotin)	825.054	3	200	2	RGRPKVVkQPCPSDG	19527168	1	1	0	1	1	1	0	1	709222	47877.5	0	137868	200	1	1	200; 302
Psip1	101739	19527168	NP_598709.1	PC4 and SFRS1-interacting protein isoform 1 [Mus musculus]	83	1	[R].NMLKGQHEKEAGDR.[K]	NMLkGQHEKEAGDR	[K4](Biotin)	460.471	4	302	2	AHRRNMLkGQHEKEA	19527168	1	0	0	0	1	0	0	0	319031	0	0	0	200	1	1	200; 302
Psip1	101739	19527168	NP_598709.1	PC4 and SFRS1-interacting protein isoform 1 [Mus musculus]	83	1	[K].VVKQPCPSDGDMVIDEDKSKK.[K]	VVkQPCPSDGDMVIDEDKSKK	[K3](Biotin)	651.065	4	200	3	RGRPKVVkQPCPSDG	19527168	1	0	0	0	1	0	0	0	310404	0	0	0	200	1	1	200; 302
Epb4.1l3	13823	568998900	XP_006523666.1	band 4.1-like protein 3 isoform X1 [Mus musculus]	109	2	[K].TVKGGISETR.[I]	TVkGGISETR	[K3](Biotin)	637.332	2	1429	1	THITKTVkGGISETR	568998900	1	0	0	0	1	0	0	0	0	0	0	0				1429
Hnrnpu	51810	160333923	NP_058085.2	heterogeneous nuclear ribonucleoprotein U [Mus musculus]	67	1	[K].EAAGKSSGPTSLFAVTVAPPGAR.[Q]	EAAGkSSGPTSLFAVTVAPPGAR	[K5](Biotin)	799.747	3	181	1	AGKEAAGkSSGPTSL	160333923	1	1	0	0	2	3	0	0	1.36722e+06	221683	0	0				12; 176; 181; 210
Hnrnpu	51810	160333923	NP_058085.2	heterogeneous nuclear ribonucleoprotein U [Mus musculus]	67	1	[R].GAGKEAAGK.[S]	GAGkEAAGK	[K4](Biotin)	507.756	2	176	1	SQQRGAGkEAAGKSS	160333923	1	0	0	0	1	0	0	0	932087	0	0	0				12; 176; 181; 210
Hnrnpu	51810	160333923	NP_058085.2	heterogeneous nuclear ribonucleoprotein U [Mus musculus]	67	1	[K].LKVSELKEELKK.[R]	LkVSELKEELKK	[K2](Biotin)	418.244	4	12	3	PVNVKKLkVSELKEE	160333923	1	0	0	0	1	0	0	0	181478	0	0	0				12; 176; 181; 210
Hnrnpu	51810	160333923	NP_058085.2	heterogeneous nuclear ribonucleoprotein U [Mus musculus]	67	1	[R].GAGKEAAGKSSGPTSLFAVTVAPPGAR.[Q]	GAGKEAAGKSSGPTSLFAVTVAPPGAR	[K](Biotin)			X	2
Hnrnpu	51810	160333923	NP_058085.2	heterogeneous nuclear ribonucleoprotein U [Mus musculus]	67	1	[R].QGQQQAGGDGKTEQK.[G]	QGQQQAGGDGkTEQK	[K11](Biotin)	595.944	3	210	1	QQAGGDGkTEQKGGD	160333923	1	0	0	0	1	0	0	0	52204.6	0	0	0				12; 176; 181; 210
Snd1	56463	77404392	NP_062750.2	staphylococcal nuclease domain-containing protein 1 [Mus musculus]	57	1	[K].KEVPIHR.[V]	kEVPIHR	[K1](Biotin)	368.871	3	497	1	GKGLHSKkEVPIHRV	77404392	1	0	1	0	1	0	1	0	182132	0	247676	0	497	1	1	497
Trip12	14897	755493353	XP_011236956.1	E3 ubiquitin-protein ligase TRIP12 isoform X1 [Mus musculus]	128	1	[K].SSFLASLNPKTWGR.[L]	SSFLASLNPkTWGR	[K10](Biotin)	895.457	2	1127	1	FLASLNPkTWGRLSA	755493353	1	0	0	0	2	0	0	0	179956	0	0	0				1127
Fus	233908	20982845	NP_631888.1	RNA-binding protein FUS [Mus musculus]	14	1	[K].AAIDWFDGKEFSGNPIKVSFATRR.[A]	AAIDWFDGKEFSGNPIkVSFATRR	[K17](Biotin)	735.373	4	358	3	EFSGNPIkVSFATRR	20982845	1	0	0	0	1	0	0	0	101534	0	0	0				358
Fus	233908	20982845	NP_631888.1	RNA-binding protein FUS [Mus musculus]	14	1	[K].AAIDWFDGKEFSGNPIKVSFATR.[R]	AAIDWFDGKEFSGNPIkVSFATR	[K17](Biotin)	928.127	3	358	2	EFSGNPIkVSFATRR	20982845	1	0	0	0	1	0	0	0	261167	0	0	0				358
Top1	21969	112734855	NP_033434.2	DNA topoisomerase 1 [Mus musculus]	133	1	[R].LRDEDDADYKPK.[K]	LRDEDDADYkPK	[K10](Biotin)	564.263	3	150	1	DEDDADYkPKKIKTE	112734855	1	1	0	0	1	1	0	0	1.05784e+06	145991	0	0				150
Hist1h3d	319149	30061337	NP_835511.1	histone H3.2 [Mus musculus]	13	2	[R].KSAPATGGVK.[K]	kSAPATGGVK	[K1](Biotin)	571.307	2	28	1	LATKAARkSAPATGG	30061337	1	1	1	0	1	1	1	0	373164	34266.3	281211	0	5; 19; 24; 28	8	4	5; 19; 24; 28; 123
Hist1h3d	319149	30061337	NP_835511.1	histone H3.2 [Mus musculus]	13	2	[R].KQLATK.[A]	kQLATK	[K1](Biotin)	457.76	2	19	1	TGGKAPRkQLATKAA	30061337	0	1	1	1	0	2	1	1	0	3845055	9748534	7.72941e+06	5; 19; 24; 28	8	4	5; 19; 24; 28; 123
Hist1h3d	319149	30061337	NP_835511.1	histone H3.2 [Mus musculus]	13	2	[R].KQLATKAAR.[K]	KQLATkAAR	[K6](Biotin)	606.848	2	24	2	PRKQLATkAARKSAP	30061337	1	1	1	1	2	2	2	2	1.40444e+07	1.95366e+06	6.73171e+06	5889504	5; 19; 24; 28	8	4	5; 19; 24; 28; 123
Hist1h3d	319149	30061337	NP_835511.1	histone H3.2 [Mus musculus]	13	2	[K].RVTIMPKDIQLAR.[R]	RVTIMPkDIQLAR	[K7](Biotin)	589.664	3	123	2	KRVTIMPkDIQLARR	30061337	1	0	0	0	1	0	0	0	276752	0	0	0	5; 19; 24; 28	8	4	5; 19; 24; 28; 123
Hist1h3d	319149	30061337	NP_835511.1	histone H3.2 [Mus musculus]	13	2	[R].TKQTAR.[K]	TkQTAR	[K2](Biotin)	465.745	2	5	1	MARTkQTARKST	30061337	1	1	1	0	1	1	1	0	3.04333e+06	607122	1.5106e+06	0	5; 19; 24; 28	8	4	5; 19; 24; 28; 123
Alyref	21681	6755763	NP_035698.1	THO complex subunit 4 [Mus musculus]	11	1	[K].QLPDKWQHDLFDSGFGGGAGVETGGK.[L]	QLPDkWQHDLFDSGFGGGAGVETGGK	[K5](Biotin)	977.129	3	85	1	RPKQLPDkWQHDLFD	6755763	1	1	1	0	1	2	1	0	854568	101171	323554	0	85	1	1	85
Lima1	65970	158518433	NP_075550.2	LIM domain and actin-binding protein 1 isoform b [Mus musculus]	52	2	[K].MMFEKGEHNQTK.[S]	MMFEkGEHNQTK	[K5](Biotin)	569.255	3	43	1	RLKMMFEkGEHNQTK	158518433	1	0	0	0	1	0	0	0	470000	0	0	0				26; 38; 43; 489; 559
Lima1	65970	158518433	NP_075550.2	LIM domain and actin-binding protein 1 isoform b [Mus musculus]	52	2	[R].LKMMFEKGEHNQTK.[S]	LkMMFEKGEHNQTK	[K2](Biotin)	487.489	4	38	2	NVPLNRLkMMFEKGE	158518433	1	0	0	0	1	0	0	0	1.12492e+06	0	0	0				26; 38; 43; 489; 559
Lima1	65970	158518433	NP_075550.2	LIM domain and actin-binding protein 1 isoform b [Mus musculus]	52	2	[R].HEAEKPETSENTETSGKIEK.[Y]	HEAEKPETSENTETSGkIEK	[K17](Biotin)	618.291	4	26	1	ENTETSGkIEKYNVP	158518433	1	0	0	0	1	0	0	0	177407	0	0	0				26; 38; 43; 489; 559
Lima1	65970	158518433	NP_075550.2	LIM domain and actin-binding protein 1 isoform b [Mus musculus]	52	2	[K].EFTTQNQKSQDVGFWEGEVVR.[E]	EFTTQNQkSQDVGFWEGEVVR	[K8](Biotin)	904.094	3	559	1	EFTTQNQkSQDVGFW	158518433	1	0	0	0	1	0	0	0	287322	0	0	0				26; 38; 43; 489; 559
Lima1	65970	158518433	NP_075550.2	LIM domain and actin-binding protein 1 isoform b [Mus musculus]	52	2	[R].HEAEKPETSENTETSGKIEKYNVPLNR.[L]	HEAEKPETSENTETSGkIEKYNVPLNR	[K17](Biotin)	666.127	5	26	2	ENTETSGkIEKYNVP	158518433	1	0	0	0	1	0	0	0	269186	0	0	0				26; 38; 43; 489; 559
Lima1	65970	158518433	NP_075550.2	LIM domain and actin-binding protein 1 isoform b [Mus musculus]	52	2	[K].QTENARPSGEKENVGKSR.[W]	QTENARPSGEKENVGkSR	[K16](Biotin)	554.023	4	489	2	GEKENVGkSRWQGEE	158518433	1	0	0	0	1	0	0	0	76839.3	0	0	0				26; 38; 43; 489; 559
Ddx5	13207	568971472	XP_006532198.1	probable ATP-dependent RNA helicase DDX5 isoform X1 [Mus musculus]	34	1	[R].EANQAINPKLLQLVEDR.[G]	EANQAINPkLLQLVEDR	[K9](Biotin)	726.384	3	470	1	ANQAINPkLLQLVED	568971472	1	1	1	0	2	1	1	0	1.35294e+06	111402	256206	0	470	1	1	470
Ruvbl1	56505	9790083	NP_062659.1	ruvB-like 1 [Mus musculus]	41	1	[-].MKIEEVKSTTK.[T]	MkIEEVKSTTK	[K2](Biotin)	507.267	3	2	2	MkIEEVKST	9790083	1	1	0	0	1	1	0	0	1.11853e+06	98129	0	0				2
Ruvbl1	56505	9790083	NP_062659.1	ruvB-like 1 [Mus musculus]	41	1	[-].MKIEEVK.[S]	MkIEEVK	[K2](Biotin)	572.791	2	2	1	MkIEEVKST	9790083	1	1	0	0	2	3	0	0	8.88147e+06	658890	0	0				2
Ruvbl1	56505	9790083	NP_062659.1	ruvB-like 1 [Mus musculus]	41	1	[-].MKIEEVK.[S]	MkIEEVK	[K2](Biotin)	572.791	2	2	1	MkIEEVKST	9790083	1	1	0	0	2	3	0	0	8.88147e+06	658890	0	0				2
Rrbp1	81910	124486712	NP_077243.2	ribosome-binding protein 1 isoform a [Mus musculus]	206	1	[K].KVAKVEPAVSSIVNSIQVLASKSAILEATPK.[E]	KVAKVEPAVSSIVNSIQVLASkSAILEATPK	[K22](Biotin)	851.736	4	166	3	SIQVLASkSAILEAT	124486712	0	0	1	0	0	0	1	0	0	0	467683	0	166	1	1
Hmga1	15361	86198323	NP_057869.2	high mobility group protein HMG-I/HMG-Y isoform a [Mus musculus]	16	2	[R].KVTTAPGR.[K]	kVTTAPGR	[K1](Biotin)	528.287	2	74	1	KGAAKTRkVTTAPGR	86198323	0	1	0	1	0	1	0	1	0	44072.3	0	130332	74	1	1	15; 74
Hmga1	15361	86198323	NP_057869.2	high mobility group protein HMG-I/HMG-Y isoform a [Mus musculus]	16	2	[K].SSQPLASKQEKDGTEKR.[G]	SSQPLASKQEKDGTEKR	[K](Biotin)			X	3
Hmga1	15361	86198323	NP_057869.2	high mobility group protein HMG-I/HMG-Y isoform a [Mus musculus]	16	2	[K].SSQPLASKQEK.[D]	SSQPLASkQEK	[K8](Biotin)	714.862	2	15	1	SSQPLASkQEKDGTE	86198323	1	0	0	0	1	0	0	0	227387	0	0	0	74	1	1	15; 74
Hmga1	15361	86198323	NP_057869.2	high mobility group protein HMG-I/HMG-Y isoform a [Mus musculus]	16	2	[K].SSQPLASKQEKDGTEK.[R]	SSQPLASKQEKDGTEK	[K](Biotin)			X	2
Rpl19	19921	226958653	NP_033104.2	60S ribosomal protein L19 isoform 1 [Mus musculus]	32	1	[K].TLSKEEETKK.[-]	TLSKEEETKk	[K10](Biotin)	473.578	3	196	2	SKEEETKk	226958653	1	0	0	0	1	0	0	0	71432.3	0	0	0				196
Bcl7c	12055	568949472	XP_006507332.1	B-cell CLL/lymphoma 7 protein family member C isoform X1 [Mus musculus]	13	1	[K].VMATIEKVR.[R]	VMATIEkVR	[K7](Biotin)	636.842	2	27	1	KVMATIEkVRRWEKR	568949472	1	0	0	0	1	0	0	0	217247	0	0	0				27
Hist1h1b	56702	21426893	NP_064418.1	histone H1.5 [Mus musculus]	65	1	[K].AVSASKER.[G]	AVSASkER	[K6](Biotin)	537.275	2	52	1	TKAVSASkERGGVSL	21426893	1	0	0	0	1	0	0	0	134880	0	0	0				52
Zfhx3	11906	568955957	XP_006530648.1	zinc finger homeobox protein 3 isoform X1 [Mus musculus]	226	1	[K].NFQHPLVSTANLIGPGHSFYGKFSGIR.[M]	NFQHPLVSTANLIGPGHSFYGkFSGIR	[K22](Biotin)	793.402	4	367	1	PGHSFYGkFSGIRME	568955957	1	0	0	0	1	0	0	0	195217	0	0	0				367
Hmgn1	15312	41406074	NP_032277.3	non-histone chromosomal protein HMG-14 [Mus musculus]	19	1	[R].LSAKPAPAKVDAKPK.[K]	LSAKPAPAkVDAKPK	[K9](Biotin)	583.002	3	31	1	SAKPAPAkVDAKPKK	41406074	1	0	0	0	2	0	0	0	368498	0	0	0				31
Dmap1	66233	12963557	NP_075667.1	DNA methyltransferase 1-associated protein 1 [Mus musculus]	50	1	[R].SQDLQKLITAADTTAEQR.[R]	SQDLQkLITAADTTAEQR	[K6](Biotin)	739.039	3	270	1	KRSQDLQkLITAADT	12963557	1	0	0	0	1	0	0	0	104407	0	0	0				270
Smarce1	57376	10181166	NP_065643.1	SWI/SNF-related matrix-associated actin-dependent regulator of chromatin subfamily E member 1 [Mus musculus]	30	1	[K].ASNPDLKLWEIGK.[I]	ASNPDLkLWEIGK	[K7](Biotin)	848.943	2	92	1	KASNPDLkLWEIGKI	10181166	1	1	0	0	2	2	0	0	636179	54226.3	0	0				92
Rbbp6	19647	163937858	NP_035377.2	E3 ubiquitin-protein ligase RBBP6 isoform 1 [Mus musculus]	225	1	[K].STSKTYVISR.[T]	STSkTYVISR	[K4](Biotin)	684.354	2	85	1	GGVKSTSkTYVISRT	163937858	0	1	0	0	0	1	0	0	0	54048.3	0	0				85
Wdr60	217935	568979469	XP_006515843.1	WD repeat-containing protein 60 isoform X1 [Mus musculus]	85	1	[R].VGELSLKMFQK.[Q]	VGELSLkMFQK	[K7](Biotin)	753.398	2	413	1	RVGELSLkMFQKQGW	568979469	1	0	0	0	1	0	0	0	123148	0	0	0				413
Zfp512	269639	254553392	NP_766581.2	zinc finger protein 512 [Mus musculus]	63	1	[R].KSTYWMKMR.[R]	KSTYWMkMR	[K7](Biotin)	486.235	3	79	2	RKSTYWMkMRRIKPA	254553392	1	0	0	0	1	0	0	0	226858	0	0	0				79
Surf6	20935	6678185	NP_033324.1	surfeit locus protein 6 [Mus musculus]	58	1	[R].LHEKIQLAR.[G]	LHEkIQLAR	[K4](Biotin)	667.375	2	122	1	LRQRLHEkIQLARGQ	6678185	1	0	1	1	2	0	1	1	1.91446e+07	0	3045391	2799697	122	4	1	122
Surf6	20935	6678185	NP_033324.1	surfeit locus protein 6 [Mus musculus]	58	1	[R].QRLHEKIQLAR.[G]	QRLHEkIQLAR	[K6](Biotin)	539.971	3	122	2	LRQRLHEkIQLARGQ	6678185	1	1	1	1	2	2	1	1	2.62879e+06	313980	369380	260813	122	4	1	122
Hcfc1	15161	569009735	XP_006527898.1	host cell factor 1 isoform X1 [Mus musculus]	72	1	[K].VMTSGTGAPAKIITAVPK.[I]	VMTSGTGAPAkIITAVPK	[K11](Biotin)	656.696	3	813	1	SGTGAPAkIITAVPK	569009735	1	0	0	0	1	0	0	0	587794	0	0	0				665; 813; 836
Hcfc1	15161	569009735	XP_006527898.1	host cell factor 1 isoform X1 [Mus musculus]	72	1	[K].TITLVKSPISVPGGSALISNLGK.[V]	TITLVkSPISVPGGSALISNLGK	[K6](Biotin)	826.807	3	665	1	TKTITLVkSPISVPG	569009735	1	1	0	0	2	1	0	0	1.19085e+06	45154.6	0	0				665; 813; 836
Hcfc1	15161	569009735	XP_006527898.1	host cell factor 1 isoform X1 [Mus musculus]	72	1	[K].IATGHGQQGVTQVVLKGAPGQPGTILR.[T]	IATGHGQQGVTQVVLkGAPGQPGTILR	[K16](Biotin)	728.15	4	836	1	GVTQVVLkGAPGQPG	569009735	1	1	0	0	2	1	0	0	1.70357e+06	39173	0	0				665; 813; 836
Snrpe	20643	27883844	NP_033253.1	small nuclear ribonucleoprotein E [Mus musculus]	6	1	[R].GQGQKVQK.[V]	GQGQkVQK	[K5](Biotin)	549.79	2	9	1	AYRGQGQkVQKVMVQ	27883844	1	1	0	0	1	1	0	0	544342	84103.2	0	0				9
Ptrf	19285	6679567	NP_033012.1	polymerase I and transcript release factor [Mus musculus]	39	1	[R].NFKVMIYQDEVKLPAK.[L]	NFkVMIYQDEVKLPAK	[K3](Biotin)	717.044	3	154	2	LLRRRNFkVMIYQDE	6679567	1	0	0	0	1	0	0	0	150025	0	0	0				154
Cbx3	12417	108860695	NP_031650.3	chromobox protein homolog 3 [Mus musculus]	25	1	[R].VVNGKVEYFLK.[W]	VVNGkVEYFLK	[K5](Biotin)	761.412	2	44	1	DRRVVNGkVEYFLKW	108860695	1	0	0	0	1	0	0	0	167592	0	0	0				44
Nipbl	71175	568990286	XP_006520058.1	nipped-B-like protein isoform X1 [Mus musculus]	243	1	[R].NIHDNKVSGPLSGNSANHHADNPR.[H]	NIHDNkVSGPLSGNSANHHADNPR	[K6](Biotin)	556.264	5	222	1	LRNIHDNkVSGPLSG	568990286	0	1	0	0	0	1	0	0	0	23369.8	0	0				222; 959
Nipbl	71175	568990286	XP_006520058.1	nipped-B-like protein isoform X1 [Mus musculus]	243	1	[R].DKDGNITQETK.[K]	DkDGNITQETK	[K2](Biotin)	737.845	2	959	1	IPKIKRDkDGNITQE	568990286	1	0	0	0	1	0	0	0	0	0	0	0				222; 959
Ncl	17975	84875537	NP_035010.3	nucleolin [Mus musculus]	90	1	[K].NITPAKVIPTPGKK.[G]	NITPAkVIPTPGKK	[K6](Biotin)	563.996	3	102	2	KKNITPAkVIPTPGK	84875537	1	1	1	0	1	2	1	0	1.96443e+06	421124	204752	0	102	1	1	3; 63; 102; 116; 132; 230; 478
Ncl	17975	84875537	NP_035010.3	nucleolin [Mus musculus]	90	1	[K].KTPAKVVPMK.[A]	KTPAkVVPMK	[K5](Biotin)	442.254	3	230	2	KGKKTPAkVVPMKAK	84875537	1	1	0	0	1	1	0	0	811603	67252.6	0	0	102	1	1	3; 63; 102; 116; 132; 230; 478
Ncl	17975	84875537	NP_035010.3	nucleolin [Mus musculus]	90	1	[K].KVVVSQTK.[K]	kVVVSQTK	[K1](Biotin)	557.818	2	63	1	ATTTPAKkVVVSQTK	84875537	0	1	0	0	0	1	0	0	0	136378	0	0	102	1	1	3; 63; 102; 116; 132; 230; 478
Ncl	17975	84875537	NP_035010.3	nucleolin [Mus musculus]	90	1	[K].GAAQAKALVPTPGKK.[G]	GAAQAkALVPTPGKK	[K6](Biotin)	554.984	3	116	2	KKGAAQAkALVPTPG	84875537	1	1	0	0	1	1	0	0	795605	99679.4	0	0	102	1	1	3; 63; 102; 116; 132; 230; 478
Ncl	17975	84875537	NP_035010.3	nucleolin [Mus musculus]	90	1	[K].KVVVSQTKK.[A]	KVVVSQTKK	[K](Biotin)			X	2
Ncl	17975	84875537	NP_035010.3	nucleolin [Mus musculus]	90	1	[K].VVVSQTKK.[A]	VVVSQTKK	[K](Biotin)			X	1
Ncl	17975	84875537	NP_035010.3	nucleolin [Mus musculus]	90	1	[K].TPAKVVPMK.[A]	TPAkVVPMK	[K4](Biotin)	598.83	2	230	1	KGKKTPAkVVPMKAK	84875537	1	0	0	0	1	0	0	0	905828	0	0	0	102	1	1	3; 63; 102; 116; 132; 230; 478
Ncl	17975	84875537	NP_035010.3	nucleolin [Mus musculus]	90	1	[R].TGKTSTWSGESK.[T]	TGkTSTWSGESK	[K3](Biotin)	747.85	2	478	1	QRQERTGkTSTWSGE	84875537	1	1	0	0	1	1	0	0	248185	26337.6	0	0	102	1	1	3; 63; 102; 116; 132; 230; 478
Ncl	17975	84875537	NP_035010.3	nucleolin [Mus musculus]	90	1	[K].NITPAKVIPTPGK.[K]	NITPAkVIPTPGK	[K6](Biotin)	781.442	2	102	1	KKNITPAkVIPTPGK	84875537	1	0	0	0	1	0	0	0	304658	0	0	0	102	1	1	3; 63; 102; 116; 132; 230; 478
Ncl	17975	84875537	NP_035010.3	nucleolin [Mus musculus]	90	1	[-].MVKLAK.[A]	MVkLAK	[K3](Biotin)	479.267	2	3	1	MVkLAKAGKT	84875537	1	1	0	0	1	2	0	0	229924	37097.7	0	0	102	1	1	3; 63; 102; 116; 132; 230; 478
Ncl	17975	84875537	NP_035010.3	nucleolin [Mus musculus]	90	1	[R].LVSQDGKSK.[G]	LVSQDGKSK	[K](Biotin)			X	1
Ncl	17975	84875537	NP_035010.3	nucleolin [Mus musculus]	90	1	[K].GAATPAKGAK.[N]	GAATPAkGAK	[K7](Biotin)	549.294	2	132	1	KGAATPAkGAKNGKN	84875537	1	0	0	0	1	0	0	0	225260	0	0	0	102	1	1	3; 63; 102; 116; 132; 230; 478
Eif2s3x	26905	6753738	NP_036140.1	eukaryotic translation initiation factor 2 subunit 3, X-linked [Mus musculus]	36	1	[R].QDLATLDVTKLTPLSHEVISR.[Q]	QDLATLDVTkLTPLSHEVISR	[K10](Biotin)	854.792	3	27	1	LATLDVTkLTPLSHE	6753738	1	1	0	0	1	1	0	0	411410	38795.3	0	0				27
Syne3	212073	755542410	XP_006515715.2	nesprin-3 isoform X1 [Mus musculus]	54	1	[K].QVFTNNIPKAGFLINPQDPIPR.[R]	QVFTNNIPkAGFLINPQDPIPR	[K9](Biotin)	902.48	3	774	1	VFTNNIPkAGFLINP	755542410	0	0	1	1	0	0	2	2	0	0	2.42025e+06	699189	774	4	1
Zfp280c	208968	40254197	NP_705760.2	zinc finger protein 280C isoform 1 [Mus musculus]	74	1	[K].HPSTSKVNSVNPK.[K]	HPSTSkVNSVNPK	[K6](Biotin)	540.944	3	186	1	LKHPSTSkVNSVNPK	40254197	1	0	0	0	1	0	0	0	365721	0	0	0	186	1	1	180; 186
Zfp280c	208968	40254197	NP_705760.2	zinc finger protein 280C isoform 1 [Mus musculus]	74	1	[R].TGVDQTLGLKHPSTSKVNSVNPK.[K]	TGVDQTLGLKHPSTSkVNSVNPK	[K16](Biotin)	659.101	4	186	2	LKHPSTSkVNSVNPK	40254197	1	1	1	0	2	1	1	0	1.77316e+06	170677	482312	0	186	1	1	180; 186
Zfp280c	208968	40254197	NP_705760.2	zinc finger protein 280C isoform 1 [Mus musculus]	74	1	[R].TGVDQTLGLKHPSTSK.[V]	TGVDQTLGLkHPSTSK	[K10](Biotin)	632.329	3	180	1	VDQTLGLkHPSTSKV	40254197	1	1	0	0	1	1	0	0	396656	30481.8	0	0	186	1	1	180; 186
Sec61b	66212	13324684	NP_077133.1	protein transport protein Sec61 subunit beta [Mus musculus]	4	1	[R].SPSKAVAAR.[A]	SPSkAVAAR	[K4](Biotin)	556.797	2	20	1	SSGRSPSkAVAARAA	13324684	0	0	1	0	0	0	1	0	0	0	249566	0	20	1	1
Rps3a1	20091	254553321	NP_058655.3	40S ribosomal protein S3a [Mus musculus]	38	1	[K].AAGDETGAKVER.[A]	AAGDETGAkVER	[K9](Biotin)	715.345	2	249	1	AGDETGAkVERADGY	254553321	1	1	1	0	1	1	1	0	369695	40275.7	263946	0	249	1	1	249
Cebpb	12608	567757569	NP_001274667.1	CCAAT/enhancer-binding protein beta isoform b [Mus musculus]	21	1	[-].MEVANFYYEPDCLAYGAKAAR.[A]	MEVANFYYEPDCLAYGAkAAR	[K18](Biotin)	903.07	3	18	1	DCLAYGAkAARAAPR	567757569	1	0	0	0	1	0	0	0	45772.7	0	0	0				18
Kdm2a	225876	569005736	XP_006531785.1	lysine-specific demethylase 2A isoform X1 [Mus musculus]	74	1	[K].ELHGTSIVPKLQAITASSANLRPNPR.[V]	ELHGTSIVPkLQAITASSANLRPNPR	[K10](Biotin)	749.909	4	818	1	HGTSIVPkLQAITAS	569005736	1	0	0	0	1	0	0	0	889822	0	0	0				818
Bclaf1	72567	70906449	NP_001020564.1	bcl-2-associated transcription factor 1 isoform 3 [Mus musculus]	87	2	[K].LKMAPVPLDDSNRPASLTK.[D]	LkMAPVPLDDSNRPASLTK	[K2](Biotin)	760.402	3	548	1	HRPEVKLkMAPVPLD	70906449	1	0	0	0	1	0	0	0	1.2668e+06	0	0	0				333; 419; 460; 548
Bclaf1	72567	70906449	NP_001020564.1	bcl-2-associated transcription factor 1 isoform 3 [Mus musculus]	87	2	[K].SVLADQGKSFATSSHR.[N]	SVLADQGkSFATSSHR	[K8](Biotin)	639.648	3	419	1	SVLADQGkSFATSSH	70906449	0	1	0	0	0	1	0	0	0	35538.9	0	0				333; 419; 460; 548
Bclaf1	72567	70906449	NP_001020564.1	bcl-2-associated transcription factor 1 isoform 3 [Mus musculus]	87	2	[K].TGKFLKR.[F]	TGkFLKR	[K3](Biotin)	359.207	3	333	2	QETAKTGkFLKRFTD	70906449	1	0	0	0	1	0	0	0	626841	0	0	0				333; 419; 460; 548
Bclaf1	72567	70906449	NP_001020564.1	bcl-2-associated transcription factor 1 isoform 3 [Mus musculus]	87	2	[K].TGKFLK.[R]	TGkFLK	[K3](Biotin)	460.258	2	333	1	QETAKTGkFLKRFTD	70906449	1	0	0	0	1	0	0	0	147968	0	0	0				333; 419; 460; 548
Bclaf1	72567	70906449	NP_001020564.1	bcl-2-associated transcription factor 1 isoform 3 [Mus musculus]	87	2	[K].LKETAYIVERPSTAK.[D]	LkETAYIVERPSTAK	[K2](Biotin)	644.681	3	460	1	EEKNYKLkETAYIVE	70906449	1	0	0	0	1	0	0	0	657154	0	0	0				333; 419; 460; 548
Mllt4	17356	568999211	XP_006523815.1	afadin isoform X1 [Mus musculus]	121	1	[R].NASYLKTQVLSPDSLFTAK.[F]	NASYLkTQVLSPDSLFTAK	[K6](Biotin)	770.401	3	1734	1	QRNASYLkTQVLSPD	568999211	1	0	1	0	2	0	2	0	421772	0	385848	0	1734	2	1	1734
Gpatch4	66614	160948594	NP_001104279.1	G patch domain-containing protein 4 [Mus musculus]	56	1	[R].LEAQEQAFLAQLKGSK.[A]	LEAQEQAFLAQLkGSK	[K13](Biotin)	663.016	3	186	1	QAFLAQLkGSKALGT	160948594	1	0	0	0	1	0	0	0	0	0	0	0				186
Dnmt1	13433	568958803	XP_006510051.1	DNA (cytosine-5)-methyltransferase 1 isoform X2 [Mus musculus]	128	1	[R].LGDGVIAHKLQYTFHDVK.[N]	LGDGVIAHkLQYTFHDVK	[K9](Biotin)	567.546	4	1516	1	GDGVIAHkLQYTFHD	568958803	1	0	0	0	1	0	0	0	117471	0	0	0				1516
Mki67	17345	169234624	NP_001074586.2	antigen KI-67 [Mus musculus]	312	1	[K].SLGTHSPAVLKTIIK.[E]	SLGTHSPAVLkTIIK	[K11](Biotin)	597.678	3	508	1	THSPAVLkTIIKERP	169234624	1	1	0	0	1	1	0	0	352460	57023.4	0	0	1604	1	1	351; 508; 685; 748; 853; 945; 999; 1047; 1604; 2369
Mki67	17345	169234624	NP_001074586.2	antigen KI-67 [Mus musculus]	312	1	[R].KSLGTHSPAVLKTIIK.[E]	KSLGTHSPAVLkTIIK	[K12](Biotin)	480.534	4	508	2	THSPAVLkTIIKERP	169234624	1	1	0	0	1	1	0	0	308024	41016.3	0	0	1604	1	1	351; 508; 685; 748; 853; 945; 999; 1047; 1604; 2369
Mki67	17345	169234624	NP_001074586.2	antigen KI-67 [Mus musculus]	312	1	[K].SLPKIILR.[K]	SLPkIILR	[K4](Biotin)	583.36	2	1604	1	INKKSLPkIILRKMD	169234624	1	1	1	0	2	2	1	0	1.31994e+06	273288	128333	0	1604	1	1	351; 508; 685; 748; 853; 945; 999; 1047; 1604; 2369
Mki67	17345	169234624	NP_001074586.2	antigen KI-67 [Mus musculus]	312	1	[R].HNPKILKLECEDIK.[A]	HNPkILKLECEDIK	[K4](Biotin)	491.509	4	1047	2	GESRHNPkILKLECE	169234624	0	1	0	0	0	2	0	0	0	113606	0	0	1604	1	1	351; 508; 685; 748; 853; 945; 999; 1047; 1604; 2369
Mki67	17345	169234624	NP_001074586.2	antigen KI-67 [Mus musculus]	312	1	[K].VLLAQKLEPAIYVTR.[G]	VLLAQkLEPAIYVTR	[K6](Biotin)	647.373	3	2369	1	GKVLLAQkLEPAIYV	169234624	1	0	0	0	2	0	0	0	182117	0	0	0	1604	1	1	351; 508; 685; 748; 853; 945; 999; 1047; 1604; 2369
Mki67	17345	169234624	NP_001074586.2	antigen KI-67 [Mus musculus]	312	1	[R].HSVNLDEGESAQAVHKTVTPGK.[L]	HSVNLDEGESAQAVHkTVTPGK	[K16](Biotin)	633.315	4	351	1	ESAQAVHkTVTPGKL	169234624	1	1	0	0	1	1	0	0	111178	26175.5	0	0	1604	1	1	351; 508; 685; 748; 853; 945; 999; 1047; 1604; 2369
Mki67	17345	169234624	NP_001074586.2	antigen KI-67 [Mus musculus]	312	1	[K].KVNIIVYATK.[E]	kVNIIVYATK	[K1](Biotin)	687.894	2	945	1	DQGITEKkVNIIVYA	169234624	1	0	0	0	1	0	0	0	230771	0	0	0	1604	1	1	351; 508; 685; 748; 853; 945; 999; 1047; 1604; 2369
Mki67	17345	169234624	NP_001074586.2	antigen KI-67 [Mus musculus]	312	1	[R].QLQVTNSGDIPEPITTEILGEKVLSSTR.[N]	QLQVTNSGDIPEPITTEILGEkVLSSTR	[K22](Biotin)	1084.57	3	748	1	TTEILGEkVLSSTRN	169234624	1	0	0	0	1	0	0	0	322128	0	0	0	1604	1	1	351; 508; 685; 748; 853; 945; 999; 1047; 1604; 2369
Mki67	17345	169234624	NP_001074586.2	antigen KI-67 [Mus musculus]	312	1	[R].VLCKSPQVTTENITTNTKPQTSTSGK.[K]	VLCkSPQVTTENITTNTKPQTSTSGK	[K4](Biotin)	1016.18	3	999	1	DRTRVLCkSPQVTTE	169234624	1	0	0	0	1	0	0	0	0	0	0	0	1604	1	1	351; 508; 685; 748; 853; 945; 999; 1047; 1604; 2369
Mki67	17345	169234624	NP_001074586.2	antigen KI-67 [Mus musculus]	312	1	[R].KVDFSEDLSGLTEMFKTPVKEK.[Q]	kVDFSEDLSGLTEMFKTPVKEK	[K1](Biotin)	689.346	4	685	3	NNLMLNRkVDFSEDL	169234624	1	0	0	0	1	0	0	0	0	0	0	0	1604	1	1	351; 508; 685; 748; 853; 945; 999; 1047; 1604; 2369
Mki67	17345	169234624	NP_001074586.2	antigen KI-67 [Mus musculus]	312	1	[R].EQKVDQQVQDNENAPQR.[C]	EQkVDQQVQDNENAPQR	[K3](Biotin)	751.351	3	853	1	RGTFREQkVDQQVQD	169234624	1	0	0	0	1	0	0	0	0	0	0	0	1604	1	1	351; 508; 685; 748; 853; 945; 999; 1047; 1604; 2369
Npm1	18148	356582426	NP_001239190.1	nucleophosmin isoform 3 [Mus musculus]	29	2	[R].DTPAKNAQK.[S]	DTPAkNAQK	[K5](Biotin)	599.799	2	201	1	SVRDTPAkNAQKSNQ	356582426	1	0	0	1	1	0	0	1	426556	0	0	78672.8	201; 211	2	2	201; 211; 221; 246; 248
Npm1	18148	356582426	NP_001239190.1	nucleophosmin isoform 3 [Mus musculus]	29	2	[R].SKGQESFK.[K]	SkGQESFK	[K2](Biotin)	568.774	2	221	1	KPSTPRSkGQESFKK	356582426	1	1	0	0	1	1	0	0	815818	86889.7	0	0	201; 211	2	2	201; 211; 221; 246; 248
Npm1	18148	356582426	NP_001239190.1	nucleophosmin isoform 3 [Mus musculus]	29	1	[R].SAPGGGNKVPQKK.[V]	SAPGGGNKVPQKK	[K](Biotin)			X	2
Npm1	18148	356582426	NP_001239190.1	nucleophosmin isoform 3 [Mus musculus]	29	2	[K].SNQNGKDLKPSTPR.[S]	SNQNGkDLKPSTPR	[K6](Biotin)	589.965	3	211	1	QKSNQNGkDLKPSTP	356582426	0	1	1	0	0	1	1	0	0	174719	205428	0	201; 211	2	2	201; 211; 221; 246; 248
Npm1	18148	356582426	NP_001239190.1	nucleophosmin isoform 3 [Mus musculus]	29	2	[K].TPKGPSSVEDIKAK.[M]	TPKGPSSVEDIkAK	[K12](Biotin)	561.631	3	246	2	PSSVEDIkAKMQASI	356582426	0	1	0	0	0	1	0	0	0	146156	0	0	201; 211	2	2	201; 211; 221; 246; 248
Npm1	18148	356582426	NP_001239190.1	nucleophosmin isoform 3 [Mus musculus]	29	2	[K].GPSSVEDIKAK.[M]	GPSSVEDIKAK	[K](Biotin)			X	1
Npm1	18148	356582426	NP_001239190.1	nucleophosmin isoform 3 [Mus musculus]	29	1	[K].RSAPGGGNKVPQKK.[V]	RSAPGGGNKVPQKK	[K](Biotin)			X	3
Npm1	18148	356582426	NP_001239190.1	nucleophosmin isoform 3 [Mus musculus]	29	1	[K].AKMQASIEKAH.[-]	AkMQASIEKAH	[K2](Biotin)	480.576	3	248	2	SVEDIKAkMQASIEK	356582426	1	1	0	0	1	1	0	0	647296	65457.8	0	0	201; 211	2	2	201; 211; 221; 246; 248
Npm1	18148	356582426	NP_001239190.1	nucleophosmin isoform 3 [Mus musculus]	29	1	[K].ADKDYHFKVDNDENEHQLSLR.[T]	ADKDYHFKVDNDENEHQLSLR	[K](Biotin)			X	2
Xrcc1	22594	568945263	XP_006539800.1	DNA repair protein XRCC1 isoform X1 [Mus musculus]	41	1	[K].FHSPPDKDEAEATSQKVTVTK.[L]	FHSPPDKDEAEATSQkVTVTK	[K16](Biotin)	636.063	4	166	2	EAEATSQkVTVTKLG	568945263	1	0	0	0	1	0	0	0	122481	0	0	0				166
Numa1	101706	568949271	XP_006507236.1	nuclear mitotic apparatus protein 1 isoform X2 [Mus musculus]	149	1	[R].LPPKVESLESLYFTPTPAR.[G]	LPPkVESLESLYFTPTPAR	[K4](Biotin)	791.086	3	1762	1	ISQRLPPkVESLESL	568949271	1	1	1	0	5	2	1	0	1.81587e+07	763202	125860	0	1762	1	1	1078; 1762; 1931
Numa1	101706	568949271	XP_006507236.1	nuclear mitotic apparatus protein 1 isoform X2 [Mus musculus]	149	1	[K].ELQQTLEQLKIQLVKK.[E]	ELQQTLEQLkIQLVKK	[K10](Biotin)	722.418	3	1078	2	QQTLEQLkIQLVKKE	568949271	1	0	0	0	1	0	0	0	422242	0	0	0	1762	1	1	1078; 1762; 1931
Numa1	101706	568949271	XP_006507236.1	nuclear mitotic apparatus protein 1 isoform X2 [Mus musculus]	149	1	[K].ELQQTLEQLKIQLVK.[K]	ELQQTLEQLkIQLVK	[K10](Biotin)	679.719	3	1078	1	QQTLEQLkIQLVKKE	568949271	1	0	0	0	1	0	0	0	265530	0	0	0	1762	1	1	1078; 1762; 1931
Numa1	101706	568949271	XP_006507236.1	nuclear mitotic apparatus protein 1 isoform X2 [Mus musculus]	149	1	[R].NRVCPPHLKTCYPLESRPTLSLATITDEEMK.[T]	NRVCPPHLkTCYPLESRPTLSLATITDEEMK	[K9](Biotin)	777.386	5	1931	2	RVCPPHLkTCYPLES	568949271	1	1	0	0	1	1	0	0	1.34687e+06	145601	0	0	1762	1	1	1078; 1762; 1931
Hcfc2	67933	755534989	XP_011241845.1	host cell factor 2 isoform X1 [Mus musculus]	46	1	[R].KNEVDEICALPATKISR.[V]	KNEVDEICALPATkISR	[K14](Biotin)	724.04	3	587	2	ICALPATkISRVEVH	755534989	1	1	0	0	1	1	0	0	925223	97307.1	0	0				587
A430005L14Rik	97159	247300747	NP_780496.2	UPF0688 protein C1orf174 homolog isoform 1 [Mus musculus]	15	1	[R].DVTSSTSAKTTCLASSSHK.[A]	DVTSSTSAkTTCLASSSHK	[K9](Biotin)	732.009	3	39	1	VTSSTSAkTTCLASS	247300747	1	0	0	0	1	0	0	0	0	0	0	0				39
Rad18	58186	267844910	NP_001161202.1	E3 ubiquitin-protein ligase RAD18 isoform 1 [Mus musculus]	44	1	[R].LMDKFLIR.[E]	LMDkFLIR	[K4](Biotin)	631.344	2	135	1	QANRLMDkFLIRETG	267844910	1	1	0	0	2	3	0	0	2.0413e+06	242296	0	0				127; 135
Rad18	58186	267844910	NP_001161202.1	E3 ubiquitin-protein ligase RAD18 isoform 1 [Mus musculus]	44	1	[K].VHNADAAQHPVKQANR.[L]	VHNADAAQHPVkQANR	[K12](Biotin)	496.25	4	127	1	DAAQHPVkQANRLMD	267844910	1	0	0	0	2	0	0	0	137647	0	0	0				127; 135
Mtdh	67154	568990625	XP_006520213.1	protein LYRIC isoform X3 [Mus musculus]	71	1	[K].SGKGDSTLQVSSR.[L]	SGkGDSTLQVSSR	[K3](Biotin)	774.38	2	263	1	VSNFKSGkGDSTLQV	568990625	0	0	1	1	0	0	1	1	0	0	328367	276548	260; 263; 455	6	3
Mtdh	67154	568990625	XP_006520213.1	protein LYRIC isoform X3 [Mus musculus]	71	1	[K].ACSLKTMSTSDPAEVLIK.[N]	ACSLkTMSTSDPAEVLIK	[K5](Biotin)	726.361	3	455	1	QEKACSLkTMSTSDP	568990625	0	0	1	1	0	0	1	1	0	0	290994	329447	260; 263; 455	6	3
Mtdh	67154	568990625	XP_006520213.1	protein LYRIC isoform X3 [Mus musculus]	71	1	[K].NKGDSHLNVQVSNFKSGKGDSTLQVSSR.[L]	NKGDSHLNVQVSNFkSGKGDSTLQVSSR	[K15](Biotin)	804.653	4	260	3	NVQVSNFkSGKGDST	568990625	0	0	1	0	0	0	2	0	0	0	0	0	260; 263; 455	6	3
Yeats2	208146	568994852	XP_006521965.1	YEATS domain-containing protein 2 isoform X1 [Mus musculus]	94	1	[K].AVTGGLGAFTKVIIK.[Q]	AVTGGLGAFTkVIIK	[K11](Biotin)	850.994	2	586	1	GGLGAFTkVIIKQEP	568994852	1	0	0	0	2	0	0	0	1131612	0	0	0				586; 891
Yeats2	208146	568994852	XP_006521965.1	YEATS domain-containing protein 2 isoform X1 [Mus musculus]	94	1	[K].VISGQKTTLFTQAATAGQASLLKLPDNTLK.[S]	VISGQkTTLFTQAATAGQASLLKLPDNTLK	[K6](Biotin)	836.207	4	891	2	LKVISGQkTTLFTQA	568994852	1	0	0	0	2	0	0	0	484448	0	0	0				586; 891
Ktn1	16709	568986868	XP_006518690.1	kinectin isoform X1 [Mus musculus]	163	1	[K].AQQSLNSIHSKISLK.[A]	AQQSLNSIHSkISLK	[K11](Biotin)	627.34	3	1272	1	SLNSIHSkISLKAAG	568986868	1	0	0	0	1	0	0	0	532924	0	0	0	150	1	1	1272
Ktn1	16709	568986868	XP_006518690.1	kinectin isoform X1 [Mus musculus]	163	1	[K].KVEPVLVTKQPAPPPPLEAAALK.[K]	KVEPVLVTkQPAPPPPLEAAALK	[K9](Biotin)	873.84	3	150	2	VEPVLVTkQPAPPPP	568986868	0	0	1	0	0	0	1	0	0	0	232012	0	150	1	1	1272
Hist1h2bb	319178	28316760	NP_783595.1	histone H2B type 1-B [Mus musculus]	20	3	[R].LAHYNKR.[S]	LAHYNkR	[K6](Biotin)	376.531	3	86	1	SRLAHYNkRSTITSR	28316760	0	0	0	1	0	0	0	1	0	0	0	467668	86; 109	2	2	21; 109; 117
Hist1h2bb	319178	28316760	NP_783595.1	histone H2B type 1-B [Mus musculus]	20	1	[K].AISKAQKK.[D]	AISkAQKK	[K4](Biotin)	367.214	3	21	2	GSKKAISkAQKKDGK	28316760	0	1	0	0	0	1	0	0	0	229712	0	0	86; 109	2	2	21; 109; 117
Hist1h2bb	319178	28316760	NP_783595.1	histone H2B type 1-B [Mus musculus]	20	3	[R].LLLPGELAKHAVSEGTK.[A]	LLLPGELAkHAVSEGTK	[K9](Biotin)	663.7	3	109	1	LLPGELAkHAVSEGT	28316760	1	1	1	0	1	1	1	0	610497	37995.3	446898	0	86; 109	2	2	21; 109; 117
Hist1h2bb	319178	28316760	NP_783595.1	histone H2B type 1-B [Mus musculus]	20	3	[K].AVTKYTSSK.[-I]	AVTKYTSSK	[K](Biotin)			X	1
Hist1h2bb	319178	28316760	NP_783595.1	histone H2B type 1-B [Mus musculus]	20	3	[K].HAVSEGTKAVTK.[Y]	HAVSEGTkAVTK	[K8](Biotin)	485.253	3	117	1	HAVSEGTkAVTKYTS	28316760	0	1	0	0	0	1	0	0	0	49880.8	0	0	86; 109	2	2	21; 109; 117
Tcof1	21453	312176443	NP_001185913.1	treacle protein isoform 1 [Mus musculus]	157	1	[K].TVNSVSHPGSGKTVVHLLSGKSPKK.[S]	TVNSVSHPGSGkTVVHLLSGKSPKK	[K12](Biotin)	693.381	4	144	3	VSHPGSGkTVVHLLS	312176443	1	0	0	0	1	0	0	0	137277	0	0	0				144; 241; 301; 318; 442
Tcof1	21453	312176443	NP_001185913.1	treacle protein isoform 1 [Mus musculus]	157	1	[K].TVNSVSHPGSGKTVVHLLSGKSPK.[K]	TVNSVSHPGSGkTVVHLLSGKSPK	[K12](Biotin)	661.36	4	144	2	VSHPGSGkTVVHLLS	312176443	1	1	0	0	2	2	0	0	2.14686e+06	198951	0	0				144; 241; 301; 318; 442
Tcof1	21453	312176443	NP_001185913.1	treacle protein isoform 1 [Mus musculus]	157	1	[K].VKPLGKSSQVRPVSTVTPGSSGK.[G]	VKPLGkSSQVRPVSTVTPGSSGK	[K6](Biotin)	631.347	4	442	1	AKVKPLGkSSQVRPV	312176443	1	0	0	0	1	0	0	0	437675	0	0	0				144; 241; 301; 318; 442
Tcof1	21453	312176443	NP_001185913.1	treacle protein isoform 1 [Mus musculus]	157	1	[R].TAPGPTKLGNVAPTPAKPAR.[A]	TAPGPTkLGNVAPTPAKPAR	[K7](Biotin)	724.068	3	241	1	RTAPGPTkLGNVAPT	312176443	1	0	0	0	1	0	0	0	238746	0	0	0				144; 241; 301; 318; 442
Tcof1	21453	312176443	NP_001185913.1	treacle protein isoform 1 [Mus musculus]	157	1	[K].TANKTVNSVSHPGSGKTVVHLLSGKSPK.[K]	TANKTVNSVSHPGSGkTVVHLLSGKSPK	[K16](Biotin)	612.133	5	144	3	VSHPGSGkTVVHLLS	312176443	1	0	0	0	1	0	0	0	218973	0	0	0				144; 241; 301; 318; 442
Tcof1	21453	312176443	NP_001185913.1	treacle protein isoform 1 [Mus musculus]	157	1	[K].ASGKGPHVR.[A]	ASGkGPHVR	[K4](Biotin)	378.866	3	301	1	SQVKASGkGPHVRAD	312176443	1	1	0	0	1	1	0	0	214269	39802.2	0	0				144; 241; 301; 318; 442
Tcof1	21453	312176443	NP_001185913.1	treacle protein isoform 1 [Mus musculus]	157	1	[K].GISGKGPILATPGKTGPAATQAK.[A]	GISGkGPILATPGKTGPAATQAK	[K5](Biotin)	783.096	3	318	2	SAKGISGkGPILATP	312176443	1	0	0	0	1	0	0	0	0	0	0	0				144; 241; 301; 318; 442
Tox4	268741	166706895	NP_075923.2	TOX high mobility group box family member 4 [Mus musculus]	27	1	[R].QLPAQKTVVVETGKK.[Q]	QLPAQkTVVVETGKK	[K6](Biotin)	926.522	2	199	2	RRQLPAQkTVVVETG	166706895	1	1	1	1	2	4	1	1	5.65755e+07	1.26823e+07	1.82382e+06	1.23857e+06	199	2	1	199; 492
Tox4	268741	166706895	NP_075923.2	TOX high mobility group box family member 4 [Mus musculus]	27	1	[R].INLQQQPPPLQSKIVPPPTLK.[I]	INLQQQPPPLQSkIVPPPTLK	[K13](Biotin)	854.821	3	492	1	QPPPLQSkIVPPPTL	166706895	1	0	0	0	1	0	0	0	225598	0	0	0	199	2	1	199; 492
Tox4	268741	166706895	NP_075923.2	TOX high mobility group box family member 4 [Mus musculus]	27	1	[R].RQLPAQKTVVVETGKK.[Q]	RQLPAQkTVVVETGKK	[K7](Biotin)	670.052	3	199	3	RRQLPAQkTVVVETG	166706895	1	1	0	0	2	1	0	0	2.9325e+06	216789	0	0	199	2	1	199; 492
Tox4	268741	166706895	NP_075923.2	TOX high mobility group box family member 4 [Mus musculus]	27	1	[R].RQLPAQKTVVVETGK.[K]	RQLPAQkTVVVETGK	[K7](Biotin)	627.353	3	199	2	RRQLPAQkTVVVETG	166706895	1	1	0	0	1	1	0	0	567067	43134.7	0	0	199	2	1	199; 492
Tox4	268741	166706895	NP_075923.2	TOX high mobility group box family member 4 [Mus musculus]	27	1	[R].QLPAQKTVVVETGK.[K]	QLPAQkTVVVETGK	[K6](Biotin)	862.474	2	199	1	RRQLPAQkTVVVETG	166706895	1	1	0	0	2	4	0	0	6048809	787827	0	0	199	2	1	199; 492
Cdca7	66953	21313220	NP_080142.1	cell division cycle-associated protein 7 [Mus musculus]	24	1	[K].NLKDVR.[Y]	NLkDVR	[K3](Biotin)	485.761	2	17	1	ALKVKNLkDVRYMKL	21313220	1	1	0	0	1	1	0	0	1.25456e+06	107813	0	0	17	1	1	17
Cdca7	66953	21313220	NP_080142.1	cell division cycle-associated protein 7 [Mus musculus]	24	1	[K].VKNLKDVR.[Y]	VKNLkDVR	[K5](Biotin)	399.897	3	17	2	ALKVKNLkDVRYMKL	21313220	1	0	0	1	1	0	0	1	226235	0	0	68045.8	17	1	1	17
Cwc15	66070	568959923	XP_006510600.1	spliceosome-associated protein CWC15 homolog isoform X1 [Mus musculus]	23	1	[R].DLPSHTKIK.[Y]	DLPSHTkIK	[K7](Biotin)	632.84	2	40	1	RDLPSHTkIKYRQTT	568959923	1	1	1	1	2	3	2	2	9167468	1.35325e+06	1.8991e+06	1.01366e+06	40	4	1	40
Zmat2	66492	13385046	NP_079870.1	zinc finger matrin-type protein 2 [Mus musculus]	34	1	[K].LGKTIVITK.[T]	LGkTIVITK	[K3](Biotin)	599.866	2	64	1	DLESKLGkTIVITKT	13385046	1	0	1	0	1	0	1	0	1.43504e+06	0	774047	0	64	1	1	64
Prrc2a	53761	92110037	NP_064411.2	protein PRRC2A isoform 1 [Mus musculus]	99	1	[R].HGLQSLGKVAIAR.[R]	HGLQSLGkVAIAR	[K8](Biotin)	525.964	3	49	1	HGLQSLGkVAIARRM	92110037	1	0	0	0	1	0	0	0	171403	0	0	0				49; 788
Prrc2a	53761	92110037	NP_064411.2	protein PRRC2A isoform 1 [Mus musculus]	99	1	[R].GTPPVDPKLAWVGDVFTTTPTDPRPLTSPLR.[Q]	GTPPVDPkLAWVGDVFTTTPTDPRPLTSPLR	[K8](Biotin)	890.218	4	788	1	GTPPVDPkLAWVGDV	92110037	1	0	0	0	1	0	0	0	0	0	0	0				49; 788
Rif1	51869	146231944	NP_780447.4	telomere-associated protein RIF1 [Mus musculus]	188	1	[K].EVLKTKR.[C]	EVLkTKR	[K4](Biotin)	367.215	3	1077	2	EHQKEVLkTKRCDIP	146231944	1	1	0	0	1	1	0	0	576963	80341	0	0	1177	1	1	1049; 1077; 1177; 1276; 2041; 2155; 2337
Rif1	51869	146231944	NP_780447.4	telomere-associated protein RIF1 [Mus musculus]	188	1	[R].KEVLISSK.[I]	kEVLISSK	[K1](Biotin)	565.319	2	1177	1	ITGFDARkEVLISSK	146231944	1	1	1	0	1	1	1	0	2.97275e+06	214567	464727	0	1177	1	1	1049; 1077; 1177; 1276; 2041; 2155; 2337
Rif1	51869	146231944	NP_780447.4	telomere-associated protein RIF1 [Mus musculus]	188	1	[K].SGKLLEEEKSTDFVFIPPEGK.[E]	SGKLLEEEkSTDFVFIPPEGK	[K9](Biotin)	859.439	3	1049	2	GKLLEEEkSTDFVFI	146231944	1	0	0	0	1	0	0	0	230827	0	0	0	1177	1	1	1049; 1077; 1177; 1276; 2041; 2155; 2337
Rif1	51869	146231944	NP_780447.4	telomere-associated protein RIF1 [Mus musculus]	188	1	[K].LLEEEKSTDFVFIPPEGK.[E]	LLEEEkSTDFVFIPPEGK	[K6](Biotin)	768.721	3	1049	1	GKLLEEEkSTDFVFI	146231944	1	1	0	0	1	1	0	0	350117	48328.2	0	0	1177	1	1	1049; 1077; 1177; 1276; 2041; 2155; 2337
Rif1	51869	146231944	NP_780447.4	telomere-associated protein RIF1 [Mus musculus]	188	1	[R].GLEEIPIFDISEKAVNGVESR.[T]	GLEEIPIFDISEkAVNGVESR	[K13](Biotin)	843.431	3	2337	1	PIFDISEkAVNGVES	146231944	1	0	0	0	1	0	0	0	337826	0	0	0	1177	1	1	1049; 1077; 1177; 1276; 2041; 2155; 2337
Rif1	51869	146231944	NP_780447.4	telomere-associated protein RIF1 [Mus musculus]	188	1	[R].SQEDEISPVNKIR.[R]	SQEDEISPVNkIR	[K11](Biotin)	580.959	3	2155	1	DEISPVNkIRRVSFA	146231944	1	1	0	0	1	1	0	0	311509	23321	0	0	1177	1	1	1049; 1077; 1177; 1276; 2041; 2155; 2337
Rif1	51869	146231944	NP_780447.4	telomere-associated protein RIF1 [Mus musculus]	188	1	[R].EVTNSKSDSENLANAGKK.[S]	EVTNSkSDSENLANAGKK	[K6](Biotin)	706.676	3	1276	2	KREVTNSkSDSENLA	146231944	1	1	0	0	1	1	0	0	182005	23576.6	0	0	1177	1	1	1049; 1077; 1177; 1276; 2041; 2155; 2337
Rif1	51869	146231944	NP_780447.4	telomere-associated protein RIF1 [Mus musculus]	188	1	[R].TVNCKTETSIELNKLDEAK.[L]	TVNCkTETSIELNKLDEAK	[K5](Biotin)	807.068	3	2041	2	GERTVNCkTETSIEL	146231944	1	1	0	0	1	1	0	0	1.11061e+06	96986.3	0	0	1177	1	1	1049; 1077; 1177; 1276; 2041; 2155; 2337
Cttn	13043	75677414	NP_031829.2	src substrate cortactin isoform 1 [Mus musculus]	50	1	[K].GFGGKFGVQTDRQDK.[C]	GFGGkFGVQTDRQDK	[K5](Biotin)	622.638	3	235	2	YVKGFGGkFGVQTDR	75677414	1	1	0	0	1	1	0	0	312382	28538.1	0	0	107; 255	2	2	107; 235; 255; 309; 336; 346
Cttn	13043	75677414	NP_031829.2	src substrate cortactin isoform 1 [Mus musculus]	50	1	[R].MDKNASTFEEVVQVPSAYQKTVPIEAVTSK.[T]	MDKNASTFEEVVQVPSAYQkTVPIEAVTSK	[K20](Biotin)	881.442	4	336	2	QVPSAYQkTVPIEAV	75677414	1	0	0	0	1	0	0	0	429950	0	0	0	107; 255	2	2	107; 235; 255; 309; 336; 346
Cttn	13043	75677414	NP_031829.2	src substrate cortactin isoform 1 [Mus musculus]	50	1	[K].CALGWDHQEKLQLHESQKDYK.[T]	CALGWDHQEkLQLHESQKDYK	[K10](Biotin)	710.59	4	255	2	LGWDHQEkLQLHESQ	75677414	1	0	1	0	1	0	1	0	313917	0	0	0	107; 255	2	2	107; 235; 255; 309; 336; 346
Cttn	13043	75677414	NP_031829.2	src substrate cortactin isoform 1 [Mus musculus]	50	1	[R].SAVGHEYQSKLSK.[H]	SAVGHEYQSkLSK	[K10](Biotin)	553.945	3	107	1	VGHEYQSkLSKHCSQ	75677414	1	0	1	0	1	0	1	0	223238	0	0	0	107; 255	2	2	107; 235; 255; 309; 336; 346
Cttn	13043	75677414	NP_031829.2	src substrate cortactin isoform 1 [Mus musculus]	50	1	[K].GFGGKYGVQKDR.[M]	GFGGkYGVQKDR	[K5](Biotin)	513.257	3	309	2	YAKGFGGkYGVQKDR	75677414	0	1	0	0	0	1	0	0	0	29887.8	0	0	107; 255	2	2	107; 235; 255; 309; 336; 346
Cttn	13043	75677414	NP_031829.2	src substrate cortactin isoform 1 [Mus musculus]	50	1	[K].TVPIEAVTSKTSNIR.[A]	TVPIEAVTSkTSNIR	[K10](Biotin)	614.664	3	346	1	PIEAVTSkTSNIRAN	75677414	1	0	0	0	1	0	0	0	116860	0	0	0	107; 255	2	2	107; 235; 255; 309; 336; 346
Erc1	111173	568940315	XP_006505434.1	ELKS/Rab6-interacting/CAST family member 1 isoform X1 [Mus musculus]	110	1	[K].LSSSMNSIKTFWSPELKK.[E]	LSSSMNSIkTFWSPELKK	[K9](Biotin)	770.393	3	187	2	SSSMNSIkTFWSPEL	568940315	1	0	0	0	1	0	0	0	200841	0	0	0				187
C330007P06Rik	77644	569009123	XP_006541473.1	UPF0428 protein CXorf56 homolog isoform X1 [Mus musculus]	22	1	[K].FGQGFGKTNIYTQKQEPPKK.[V]	FGQGFGkTNIYTQKQEPPKK	[K7](Biotin)	631.328	4	128	3	KFGQGFGkTNIYTQK	569009123	1	1	1	1	1	1	1	1	1.07149e+06	114168	594788	359652	128	5	1	128
C330007P06Rik	77644	569009123	XP_006541473.1	UPF0428 protein CXorf56 homolog isoform X1 [Mus musculus]	22	1	[K].FGQGFGKTNIYTQK.[Q]	FGQGFGkTNIYTQK	[K7](Biotin)	605.636	3	128	1	KFGQGFGkTNIYTQK	569009123	1	1	1	1	2	2	2	1	2.61765e+06	262798	1.10632e+06	307324	128	5	1	128
Rnps1	19826	121674793	NP_033096.2	RNA-binding protein with serine-rich domain 1 isoform 1 [Mus musculus]	29	1	[K].DHIMEIFSTYGKIK.[M]	DHIMEIFSTYGKIK	[K](Biotin)			X	1
Rnps1	19826	121674793	NP_033096.2	RNA-binding protein with serine-rich domain 1 isoform 1 [Mus musculus]	29	1	[R].NVTKDHIMEIFSTYGKIK.[M]	NVTKDHIMEIFSTYGKIK	[K](Biotin)			X	2
Hist1h2bp	319188	160420308	NP_835509.2	histone H2B type 1-P isoform 1 [Mus musculus]	21	3	[R].LAHYNKR.[S]	LAHYNkR	[K6](Biotin)	376.531	3	86	1	SRLAHYNkRSTITSR	160420308	0	0	0	1	0	0	0	1	0	0	0	467668	21; 86; 109	3	3	21; 109; 117
Hist1h2bp	319188	160420308	NP_835509.2	histone H2B type 1-P isoform 1 [Mus musculus]	21	1	[K].AVTKAQK.[K]	AVTkAQK	[K4](Biotin)	486.271	2	21	1	GSKKAVTkAQKKDGK	160420308	0	1	0	1	0	1	0	1	0	304270	0	828454	21; 86; 109	3	3	21; 109; 117
Hist1h2bp	319188	160420308	NP_835509.2	histone H2B type 1-P isoform 1 [Mus musculus]	21	3	[R].LLLPGELAKHAVSEGTK.[A]	LLLPGELAkHAVSEGTK	[K9](Biotin)	663.7	3	109	1	LLPGELAkHAVSEGT	160420308	1	1	1	0	1	1	1	0	610497	37995.3	446898	0	21; 86; 109	3	3	21; 109; 117
Hist1h2bp	319188	160420308	NP_835509.2	histone H2B type 1-P isoform 1 [Mus musculus]	21	3	[K].AVTKYTSSK.[-I]	AVTKYTSSK	[K](Biotin)			X	1
Hist1h2bp	319188	160420308	NP_835509.2	histone H2B type 1-P isoform 1 [Mus musculus]	21	3	[K].HAVSEGTKAVTK.[Y]	HAVSEGTkAVTK	[K8](Biotin)	485.253	3	117	1	HAVSEGTkAVTKYTS	160420308	0	1	0	0	0	1	0	0	0	49880.8	0	0	21; 86; 109	3	3	21; 109; 117
Hmga1	15361	262331580	NP_001160009.1	high mobility group protein HMG-I/HMG-Y isoform b [Mus musculus]	16	2	[R].KVTTAPGR.[K]	kVTTAPGR	[K1](Biotin)	528.287	2	63	1	KGAAKTRkVTTAPGR	262331580	0	1	0	1	0	1	0	1	0	44072.3	0	130332	63	1	1	15; 63
Hmga1	15361	262331580	NP_001160009.1	high mobility group protein HMG-I/HMG-Y isoform b [Mus musculus]	16	2	[K].SSQPLASKQEKDGTEKR.[G]	SSQPLASKQEKDGTEKR	[K](Biotin)			X	3
Hmga1	15361	262331580	NP_001160009.1	high mobility group protein HMG-I/HMG-Y isoform b [Mus musculus]	16	2	[K].SSQPLASKQEK.[D]	SSQPLASkQEK	[K8](Biotin)	714.862	2	15	1	SSQPLASkQEKDGTE	262331580	1	0	0	0	1	0	0	0	227387	0	0	0	63	1	1	15; 63
Hmga1	15361	262331580	NP_001160009.1	high mobility group protein HMG-I/HMG-Y isoform b [Mus musculus]	16	2	[K].SSQPLASKQEKDGTEK.[R]	SSQPLASKQEKDGTEK	[K](Biotin)			X	2
LOC102641436	102641436	568897055	XP_006542900.1	eukaryotic translation initiation factor 5 [Mus musculus]	49	1	[K].TASVPKVETVK.[S]	TASVPkVETVK	[K6](Biotin)	692.88	2	411	1	SKTASVPkVETVKSD	568897055	1	0	0	1	1	0	0	1	818597	0	0	193258	411	1	1	411
H2afx	15270	7106331	NP_034566.1	histone H2AX [Mus musculus]	13	1	[K].APAVGKK.[A]	APAVGKK	[K](Biotin)			X	1
H2afx	15270	7106331	NP_034566.1	histone H2AX [Mus musculus]	13	1	[K].KSSATVGPKAPAVGKK.[A]	KSSATVGPkAPAVGKK	[K9](Biotin)	438.751	4	128	3	SSATVGPkAPAVGKK	7106331	1	1	0	0	2	1	0	0	379238	34658.1	0	0				128
Zfp871	208292	140969612	NP_766046.3	zinc finger protein 871 [Mus musculus]	51	1	[R].IHTGEKPYVCKPCGK.[A]	IHTGEKPYVCkPCGK	[K11](Biotin)	667.323	3	308	0	GEKPYVCkPCGKAFI	140969612	1	1	0	0	1	1	0	0	473469	328714	0	0				308
Orc3	50793	227116261	NP_056639.3	origin recognition complex subunit 3 isoform 1 [Mus musculus]	56	1	[K].GLQKTDLYHLQK.[S]	GLQkTDLYHLQK	[K4](Biotin)	557.297	3	530	1	SQPKGLQkTDLYHLQ	227116261	1	1	1	0	1	1	1	0	587889	58808.6	154092	0	530	1	1	530; 538
Orc3	50793	227116261	NP_056639.3	origin recognition complex subunit 3 isoform 1 [Mus musculus]	56	1	[K].TDLYHLQKSLLEMK.[E]	TDLYHLQkSLLEMK	[K8](Biotin)	649.003	3	538	1	TDLYHLQkSLLEMKE	227116261	1	0	0	0	1	0	0	0	82533.4	0	0	0	530	1	1	530; 538
Pdap1	231887	84781781	NP_001028485.1	28 kDa heat- and acid-stable phosphoprotein [Mus musculus]	27	1	[R].MQSLSLNK.[-]	MQSLSLNk	[K8](Biotin)	573.786	2	181	0	MQSLSLNk	84781781	1	0	0	0	1	0	0	0	129470	0	0	0				181
Pinx1	72400	18129616	NP_082504.1	PIN2/TERF1-interacting telomerase inhibitor 1 [Mus musculus]	53	1	[K].GLGAQEQGATEHIKVK.[V]	GLGAQEQGATEHIKVK	[K](Biotin)			X	1
Pinx1	72400	18129616	NP_082504.1	PIN2/TERF1-interacting telomerase inhibitor 1 [Mus musculus]	53	1	[K].GKGLGAQEQGATEHIK.[V]	GkGLGAQEQGATEHIK	[K2](Biotin)	617.311	3	43	1	KMGWSKGkGLGAQEQ	18129616	1	0	0	0	1	0	0	0	0	0	0	0				43
Serbp1	66870	165932375	NP_080090.2	plasminogen activator inhibitor 1 RNA-binding protein isoform 1 [Mus musculus]	35	1	[R].VGRRPDQQLQGDGKLIDRR.[A]	VGRRPDQQLQGDGkLIDRR	[K14](Biotin)	609.078	4	122	3	QQLQGDGkLIDRRAE	165932375	1	1	0	1	1	1	0	1	830646	97587.7	0	175544	122; 302	3	2	122; 302
Serbp1	66870	165932375	NP_080090.2	plasminogen activator inhibitor 1 RNA-binding protein isoform 1 [Mus musculus]	35	1	[R].RPDQQLQGDGKLIDRR.[A]	RPDQQLQGDGkLIDRR	[K11](Biotin)	531.03	4	122	2	QQLQGDGkLIDRRAE	165932375	1	1	1	0	1	2	1	0	1.63442e+06	166338	480628	0	122; 302	3	2	122; 302
Serbp1	66870	165932375	NP_080090.2	plasminogen activator inhibitor 1 RNA-binding protein isoform 1 [Mus musculus]	35	1	[R].AKVEFNIR.[K]	AkVEFNIR	[K2](Biotin)	601.822	2	302	1	IQNKDRAkVEFNIRK	165932375	1	0	1	0	1	0	1	0	757668	0	175953	0	122; 302	3	2	122; 302
Serbp1	66870	165932375	NP_080090.2	plasminogen activator inhibitor 1 RNA-binding protein isoform 1 [Mus musculus]	35	1	[R].VGRRPDQQLQGDGKLIDR.[R]	VGRRPDQQLQGDGkLIDR	[K14](Biotin)	570.052	4	122	2	QQLQGDGkLIDRRAE	165932375	0	1	0	0	0	1	0	0	0	55524.4	0	0	122; 302	3	2	122; 302
Tpx2	72119	568918482	XP_006500277.1	targeting protein for Xklp2 isoform X1 [Mus musculus]	97	1	[K].AQPVPHYGVPYKPHIAEAR.[N]	AQPVPHYGVPYkPHIAEAR	[K12](Biotin)	589.805	4	523	0	PHYGVPYkPHIAEAR	568918482	1	0	0	0	1	0	0	0	482994	0	0	0	258; 492	10	2	258; 492; 523; 566; 708; 739
Tpx2	72119	568918482	XP_006500277.1	targeting protein for Xklp2 isoform X1 [Mus musculus]	97	1	[R].IRVPIKDEEEEKPVVIK.[A]	IRVPIKDEEEEKPVVIK	[K](Biotin)			X	2
Tpx2	72119	568918482	XP_006500277.1	targeting protein for Xklp2 isoform X1 [Mus musculus]	97	1	[K].SPVFALK.[N]	SPVFALk	[K7](Biotin)	494.27	2	492	0	KSPVFALkNRIRVPI	568918482	1	0	1	1	1	0	1	1	129266	0	116974	107231	258; 492	10	2	258; 492; 523; 566; 708; 739
Tpx2	72119	568918482	XP_006500277.1	targeting protein for Xklp2 isoform X1 [Mus musculus]	97	1	[R].LRKELVHK.[A]	LRkELVHK	[K3](Biotin)	416.913	3	708	2	EELARLRkELVHKAN	568918482	1	0	0	0	1	0	0	0	670590	0	0	0	258; 492	10	2	258; 492; 523; 566; 708; 739
Tpx2	72119	568918482	XP_006500277.1	targeting protein for Xklp2 isoform X1 [Mus musculus]	97	1	[K].STSQVTKTVDFHFLTDER.[I]	STSQVTkTVDFHFLTDER	[K7](Biotin)	779.712	3	258	1	KSTSQVTkTVDFHFL	568918482	1	1	1	1	1	2	1	1	4.01766e+06	653536	1.28486e+06	628426	258; 492	10	2	258; 492; 523; 566; 708; 739
Tpx2	72119	568918482	XP_006500277.1	targeting protein for Xklp2 isoform X1 [Mus musculus]	97	1	[K].SPVFALKNR.[I]	SPVFALkNR	[K7](Biotin)	629.343	2	492	1	KSPVFALkNRIRVPI	568918482	1	1	1	1	3	5	2	4	5.19647e+07	7.65197e+06	1.03197e+07	2.34481e+07	258; 492	10	2	258; 492; 523; 566; 708; 739
Tpx2	72119	568918482	XP_006500277.1	targeting protein for Xklp2 isoform X1 [Mus musculus]	97	1	[R].KELVHK.[A]	kELVHK	[K1](Biotin)	327.184	3	708	1	EELARLRkELVHKAN	568918482	1	0	0	0	1	0	0	0	564836	0	0	0	258; 492	10	2	258; 492; 523; 566; 708; 739
Tpx2	72119	568918482	XP_006500277.1	targeting protein for Xklp2 isoform X1 [Mus musculus]	97	1	[K].STSQVTKTVDFHFLTDERIK.[Q]	STSQVTkTVDFHFLTDERIK	[K7](Biotin)	645.33	4	258	2	KSTSQVTkTVDFHFL	568918482	1	0	0	0	1	0	0	0	282263	0	0	0	258; 492	10	2	258; 492; 523; 566; 708; 739
Tpx2	72119	568918482	XP_006500277.1	targeting protein for Xklp2 isoform X1 [Mus musculus]	97	1	[K].SSELPLTVPVSPKFSTR.[F]	SSELPLTVPVSPkFSTR	[K13](Biotin)	691.034	3	739	1	LTVPVSPkFSTRFQ	568918482	1	0	0	0	1	0	0	0	155090	0	0	0	258; 492	10	2	258; 492; 523; 566; 708; 739
Tpx2	72119	568918482	XP_006500277.1	targeting protein for Xklp2 isoform X1 [Mus musculus]	97	1	[K].FKALPVPHFDTINLPEKK.[V]	FkALPVPHFDTINLPEKK	[K2](Biotin)	580.819	4	566	2	KGEVPKFkALPVPHF	568918482	1	0	0	0	1	0	0	0	113915	0	0	0	258; 492	10	2	258; 492; 523; 566; 708; 739
Tpx2	72119	568918482	XP_006500277.1	targeting protein for Xklp2 isoform X1 [Mus musculus]	97	1	[K].KSTSQVTKTVDFHFLTDER.[I]	KSTSQVTkTVDFHFLTDER	[K8](Biotin)	617.058	4	258	2	KSTSQVTkTVDFHFL	568918482	1	0	0	0	1	0	0	0	204142	0	0	0	258; 492	10	2	258; 492; 523; 566; 708; 739
Ccdc102a	234582	755526634	XP_011246656.1	coiled-coil domain-containing protein 102A isoform X1 [Mus musculus]	36	2	[KR].VLLKER.[ES]	VLLkER	[K4](Biotin)	492.289	2	267	1	ESQKVLLkEREDKLA	755526634	0	1	0	0	0	1	0	0	0	113442	0	0				267
Wdr70	545085	124487149	NP_001074871.1	WD repeat-containing protein 70 [Mus musculus]	48	1	[R].VGTHGGTLSSYIVKNIALDKTDDSNPR.[E]	VGTHGGTLSSYIVkNIALDKTDDSNPR	[K14](Biotin)	771.893	4	593	2	TLSSYIVkNIALDKT	124487149	1	0	0	0	1	0	0	0	715755	0	0	0				593
Hmgn2	15331	8393534	NP_058653.1	non-histone chromosomal protein HMG-17 [Mus musculus]	22	1	[K].ADAGKDANNPAENGDAKTDQAQKAEGAGDAK.[-]	ADAGKDANNPAENGDAKTDQAQKAEGAGDAK	[K](Biotin)			X	3
Hmgn2	15331	8393534	NP_058653.1	non-histone chromosomal protein HMG-17 [Mus musculus]	22	1	[K].TDQAQKAEGAGDAK.[-]	TDQAQKAEGAGDAk	[K14](Biotin)	808.377	2	90	1	AEGAGDAk	8393534	1	0	1	0	1	0	1	0	309265	0	85847	0	90	1	1	90
Cstf2	108062	569011221	XP_006528541.1	cleavage stimulation factor subunit 2 isoform X1 [Mus musculus]	13	1	[R].IVDPEIALKILHR.[Q]	IVDPEIALkILHR	[K9](Biotin)	581.672	3	189	1	VDPEIALkILHRQTN	569011221	1	1	1	0	1	1	1	0	249939	17837.9	61265.5	0	189	1	1	145; 189; 619
Cstf2	108062	569011221	XP_006528541.1	cleavage stimulation factor subunit 2 isoform X1 [Mus musculus]	13	2	[R].QSILILKEQIQK.[S]	QSILILkEQIQK	[K7](Biotin)	833.984	2	619	1	RQSILILkEQIQKST	569011221	1	0	0	0	2	0	0	0	987319	0	0	0	189	1	1	145; 189; 619
Cstf2	108062	569011221	XP_006528541.1	cleavage stimulation factor subunit 2 isoform X1 [Mus musculus]	13	2	[KR].AVASLPPEQMFELMKQMK.[L]	AVASLPPEQMFELMkQMK	[K15](Biotin)	768.714	3	145	1	EQMFELMkQMKLCVQ	569011221	1	0	0	0	1	0	0	0	288462	0	0	0	189	1	1	145; 189; 619
Knop1	66356	158966725	NP_075686.2	lysine-rich nucleolar protein 1 isoform 1 [Mus musculus]	88	1	[R].KVFYIDRNASK.[S]	kVFYIDRNASK	[K1](Biotin)	522.943	3	516	2	GFNSEARkVFYIDRN	158966725	1	1	1	1	1	2	1	1	4420023	949937	758828	502334	516	3	1	516
Knop1	66356	158966725	NP_075686.2	lysine-rich nucleolar protein 1 isoform 1 [Mus musculus]	88	1	[R].KVFYIDR.[N]	kVFYIDR	[K1](Biotin)	583.806	2	516	1	GFNSEARkVFYIDRN	158966725	1	1	1	0	1	1	1	0	4.1498e+06	384841	440627	0	516	3	1	516
2310036O22Rik	68544	85362708	NP_081036.2	uncharacterized protein C19orf43 homolog [Mus musculus]	17	1	[K].KQKTEDEVLTSKGDAWAK.[Y]	KQKTEDEVLTSkGDAWAK	[K12](Biotin)	754.048	3	143	3	EDEVLTSkGDAWAKY	85362708	1	1	0	1	1	1	0	1	261677	100297	0	233935	143	1	1	143
2310036O22Rik	68544	85362708	NP_081036.2	uncharacterized protein C19orf43 homolog [Mus musculus]	17	1	[K].QKTEDEVLTSKGDAWAK.[Y]	QKTEDEVLTSkGDAWAK	[K11](Biotin)	711.349	3	143	2	EDEVLTSkGDAWAKY	85362708	1	0	0	0	1	0	0	0	661805	0	0	0	143	1	1	143
Sipa1	20469	257153348	NP_001157952.1	signal-induced proliferation-associated protein 1 [Mus musculus]	25	1	[K].LVILPPTKQLLHFCLK.[D]	LVILPPTkQLLHFCLK	[K8](Biotin)	716.082	3	801	1	LVILPPTkQLLHFCL	257153348	1	0	0	0	1	0	0	0	162869	0	0	0				801
Sipa1	20469	257153348	NP_001157952.1	signal-induced proliferation-associated protein 1 [Mus musculus]	25	1	[R].GGPEPVQDETGKLVILPPTKQLLHFCLK.[D]	GGPEPVQDETGKLVILPPTkQLLHFCLK	[K20](Biotin)	835.95	4	801	2	LVILPPTkQLLHFCL	257153348	1	0	0	0	1	0	0	0	245532	0	0	0				801
Tfe3	209446	157384990	NP_766060.2	transcription factor E3 isoform a [Mus musculus]	19	1	[R].EVLKVQTHLENPTR.[Y]	EVLkVQTHLENPTR	[K4](Biotin)	945.5	2	177	1	QVPREVLkVQTHLEN	157384990	1	1	1	1	2	1	1	1	3.01427e+06	144731	514917	405611	177	2	1	177
Tfe3	209446	157384990	NP_766060.2	transcription factor E3 isoform a [Mus musculus]	19	1	[R].EVLKVQTHLENPTRYHLQQAR.[R]	EVLkVQTHLENPTRYHLQQAR	[K4](Biotin)	558.096	5	177	2	QVPREVLkVQTHLEN	157384990	1	1	0	0	2	2	0	0	1.19904e+06	91809.5	0	0	177	2	1	177
Champ1	101994	568953079	XP_006508742.1	chromosome alignment-maintaining phosphoprotein 1 isoform X1 [Mus musculus]	74	1	[R].KHVFLPELPK.[S]	kHVFLPELPK	[K1](Biotin)	478.604	3	546	1	ALFPESRkHVFLPEL	568953079	1	1	0	0	1	2	0	0	1.2892e+06	205674	0	0				506; 546
Champ1	101994	568953079	XP_006508742.1	chromosome alignment-maintaining phosphoprotein 1 isoform X1 [Mus musculus]	74	1	[K].VASDIWKPVLSIDAEPR.[K]	VASDIWkPVLSIDAEPR	[K7](Biotin)	708.038	3	506	0	KVASDIWkPVLSIDA	568953079	1	0	0	0	1	0	0	0	76746.4	0	0	0				506; 546
Orc2	18393	6679176	NP_032791.1	origin recognition complex subunit 2 isoform A [Mus musculus]	48	1	[K].GHSTSEKAPLVNNNKTEFLSTQPHNLR.[K]	GHSTSEKAPLVNNNkTEFLSTQPHNLR	[K15](Biotin)	649.93	5	154	2	APLVNNNkTEFLSTQ	6679176	1	0	0	0	1	0	0	0	282383	0	0	0	154	1	1	154; 250
Orc2	18393	6679176	NP_032791.1	origin recognition complex subunit 2 isoform A [Mus musculus]	48	1	[K].SKGHSTSEKAPLVNNNKTEFLSTQPHNLR.[K]	SKGHSTSEKAPLVNNNkTEFLSTQPHNLR	[K17](Biotin)	692.956	5	154	3	APLVNNNkTEFLSTQ	6679176	1	1	1	0	1	1	1	0	884977	90356.5	218905	0	154	1	1	154; 250
Orc2	18393	6679176	NP_032791.1	origin recognition complex subunit 2 isoform A [Mus musculus]	48	1	[R].DKASDLVEEYFEAHSSSKVLTSDR.[T]	DKASDLVEEYFEAHSSSkVLTSDR	[K18](Biotin)	735.6	4	250	2	FEAHSSSkVLTSDRT	6679176	1	0	0	0	1	0	0	0	120079	0	0	0	154	1	1	154; 250
Ahnak	66395	569007630	XP_006527317.1	neuroblast differentiation-associated protein AHNAK isoform X2 [Mus musculus]	790	1	[K].APKISMPDVDLNMKGPK.[V]	APkISMPDVDLNMKGPK	[K3](Biotin)	689.687	3	1193	2	DMHFKAPkISMPDVD	569007630	1	0	0	0	1	0	0	0	891452	0	0	0	1053; 1319	4	2	129; 184; 204; 245; 393; 503; 543; 562; 569; 633; 697; 713; 827; 890; 944; 996; 1011; 1053; 1065; 1183; 1190; 1193; 1252; 1267; 1309; 1316; 1319; 1328; 1384; 1391; 1445; 1507; 1519; 1582; 1628; 1697; 1761; 1775; 1823; 1885; 1889; 1892; 1903; 1966; 2228; 2239; 2302; 2369; 2380; 2497; 2508; 2522; 2556; 2818; 2825; 3024; 3065; 3075; 3086; 3277; 3898; 3964; 3967; 3978; 4120; 4169; 4219; 4226; 4303; 4…
Ahnak	66395	569007630	XP_006527317.1	neuroblast differentiation-associated protein AHNAK isoform X2 [Mus musculus]	790	1	[K].APKISMPDLHLKGPK.[V]	APkISMPDLHLKGPK	[K3](Biotin)	465.258	4	1319	2	EMNIKAPkISMPDLH	569007630	1	1	0	1	2	4	0	1	2.5991e+06	747982	0	104260	1053; 1319	4	2	129; 184; 204; 245; 393; 503; 543; 562; 569; 633; 697; 713; 827; 890; 944; 996; 1011; 1053; 1065; 1183; 1190; 1193; 1252; 1267; 1309; 1316; 1319; 1328; 1384; 1391; 1445; 1507; 1519; 1582; 1628; 1697; 1761; 1775; 1823; 1885; 1889; 1892; 1903; 1966; 2228; 2239; 2302; 2369; 2380; 2497; 2508; 2522; 2556; 2818; 2825; 3024; 3065; 3075; 3086; 3277; 3898; 3964; 3967; 3978; 4120; 4169; 4219; 4226; 4303; 4…
Ahnak	66395	569007630	XP_006527317.1	neuroblast differentiation-associated protein AHNAK isoform X2 [Mus musculus]	790	1	[K].APKISMPDIDLNLKGPK.[V]	APkISMPDIDLNLKGPK	[K3](Biotin)	693.704	3	2497	2	EMNIKAPkISMPDID	569007630	1	1	0	0	2	2	0	0	7.20345e+06	796845	0	0	1053; 1319	4	2	129; 184; 204; 245; 393; 503; 543; 562; 569; 633; 697; 713; 827; 890; 944; 996; 1011; 1053; 1065; 1183; 1190; 1193; 1252; 1267; 1309; 1316; 1319; 1328; 1384; 1391; 1445; 1507; 1519; 1582; 1628; 1697; 1761; 1775; 1823; 1885; 1889; 1892; 1903; 1966; 2228; 2239; 2302; 2369; 2380; 2497; 2508; 2522; 2556; 2818; 2825; 3024; 3065; 3075; 3086; 3277; 3898; 3964; 3967; 3978; 4120; 4169; 4219; 4226; 4303; 4…
Ahnak	66395	569007630	XP_006527317.1	neuroblast differentiation-associated protein AHNAK isoform X2 [Mus musculus]	790	1	[R].IYTTKIKPR.[L]	IYTTkIKPR	[K5](Biotin)	449.26	3	129	1	YQRIYTTkIKPRLRS	569007630	0	1	0	0	0	1	0	0	0	268960	0	0	1053; 1319	4	2	129; 184; 204; 245; 393; 503; 543; 562; 569; 633; 697; 713; 827; 890; 944; 996; 1011; 1053; 1065; 1183; 1190; 1193; 1252; 1267; 1309; 1316; 1319; 1328; 1384; 1391; 1445; 1507; 1519; 1582; 1628; 1697; 1761; 1775; 1823; 1885; 1889; 1892; 1903; 1966; 2228; 2239; 2302; 2369; 2380; 2497; 2508; 2522; 2556; 2818; 2825; 3024; 3065; 3075; 3086; 3277; 3898; 3964; 3967; 3978; 4120; 4169; 4219; 4226; 4303; 4…
Ahnak	66395	569007630	XP_006527317.1	neuroblast differentiation-associated protein AHNAK isoform X2 [Mus musculus]	790	1	[K].VEAPDVEVHGPDWHLKMPK.[V]	VEAPDVEVHGPDWHLkMPK	[K16](Biotin)	603.298	4	1628	1	HGPDWHLkMPKVKMP	569007630	1	1	0	0	1	1	0	0	886185	0	0	0	1053; 1319	4	2	129; 184; 204; 245; 393; 503; 543; 562; 569; 633; 697; 713; 827; 890; 944; 996; 1011; 1053; 1065; 1183; 1190; 1193; 1252; 1267; 1309; 1316; 1319; 1328; 1384; 1391; 1445; 1507; 1519; 1582; 1628; 1697; 1761; 1775; 1823; 1885; 1889; 1892; 1903; 1966; 2228; 2239; 2302; 2369; 2380; 2497; 2508; 2522; 2556; 2818; 2825; 3024; 3065; 3075; 3086; 3277; 3898; 3964; 3967; 3978; 4120; 4169; 4219; 4226; 4303; 4…
Ahnak	66395	569007630	XP_006527317.1	neuroblast differentiation-associated protein AHNAK isoform X2 [Mus musculus]	790	1	[K].APKISMPDFDLNLKGPK.[V]	APkISMPDFDLNLKGPK	[K3](Biotin)	699.701	3	4169	2	DMHIKAPkISMPDFD	569007630	1	1	0	0	1	1	0	0	1.36251e+06	99546.1	0	0	1053; 1319	4	2	129; 184; 204; 245; 393; 503; 543; 562; 569; 633; 697; 713; 827; 890; 944; 996; 1011; 1053; 1065; 1183; 1190; 1193; 1252; 1267; 1309; 1316; 1319; 1328; 1384; 1391; 1445; 1507; 1519; 1582; 1628; 1697; 1761; 1775; 1823; 1885; 1889; 1892; 1903; 1966; 2228; 2239; 2302; 2369; 2380; 2497; 2508; 2522; 2556; 2818; 2825; 3024; 3065; 3075; 3086; 3277; 3898; 3964; 3967; 3978; 4120; 4169; 4219; 4226; 4303; 4…
Ahnak	66395	569007630	XP_006527317.1	neuroblast differentiation-associated protein AHNAK isoform X2 [Mus musculus]	790	1	[KS].LKGPKFK.[MV]	LKGPkFK	[K5](Biotin)	348.541	3	1053	2	EGKLKGPkFKMPEMH	569007630	1	1	1	1	3	2	1	1	22104641	1.15498e+06	512327	380006	1053; 1319	4	2	129; 184; 204; 245; 393; 503; 543; 562; 569; 633; 697; 713; 827; 890; 944; 996; 1011; 1053; 1065; 1183; 1190; 1193; 1252; 1267; 1309; 1316; 1319; 1328; 1384; 1391; 1445; 1507; 1519; 1582; 1628; 1697; 1761; 1775; 1823; 1885; 1889; 1892; 1903; 1966; 2228; 2239; 2302; 2369; 2380; 2497; 2508; 2522; 2556; 2818; 2825; 3024; 3065; 3075; 3086; 3277; 3898; 3964; 3967; 3978; 4120; 4169; 4219; 4226; 4303; 4…
Ahnak	66395	569007630	XP_006527317.1	neuroblast differentiation-associated protein AHNAK isoform X2 [Mus musculus]	790	1	[K].FSMPGFKGEGPEVDVSLPK.[A]	FSMPGFkGEGPEVDVSLPK	[K7](Biotin)	749.7	3	3277	1	KFSMPGFkGEGPEVD	569007630	1	0	0	0	1	0	0	0	832169	0	0	0	1053; 1319	4	2	129; 184; 204; 245; 393; 503; 543; 562; 569; 633; 697; 713; 827; 890; 944; 996; 1011; 1053; 1065; 1183; 1190; 1193; 1252; 1267; 1309; 1316; 1319; 1328; 1384; 1391; 1445; 1507; 1519; 1582; 1628; 1697; 1761; 1775; 1823; 1885; 1889; 1892; 1903; 1966; 2228; 2239; 2302; 2369; 2380; 2497; 2508; 2522; 2556; 2818; 2825; 3024; 3065; 3075; 3086; 3277; 3898; 3964; 3967; 3978; 4120; 4169; 4219; 4226; 4303; 4…
Ahnak	66395	569007630	XP_006527317.1	neuroblast differentiation-associated protein AHNAK isoform X2 [Mus musculus]	790	1	[K].APKISMPDLHLKGPK.[V]	APkISMPDLHLKGPK	[K3](Biotin)	465.258	4	1319	2	EMNIKAPkISMPDLH	569007630	1	1	0	1	2	4	0	1	2.5991e+06	747982	0	104260	1053; 1319	4	2	129; 184; 204; 245; 393; 503; 543; 562; 569; 633; 697; 713; 827; 890; 944; 996; 1011; 1053; 1065; 1183; 1190; 1193; 1252; 1267; 1309; 1316; 1319; 1328; 1384; 1391; 1445; 1507; 1519; 1582; 1628; 1697; 1761; 1775; 1823; 1885; 1889; 1892; 1903; 1966; 2228; 2239; 2302; 2369; 2380; 2497; 2508; 2522; 2556; 2818; 2825; 3024; 3065; 3075; 3086; 3277; 3898; 3964; 3967; 3978; 4120; 4169; 4219; 4226; 4303; 4…
Ahnak	66395	569007630	XP_006527317.1	neuroblast differentiation-associated protein AHNAK isoform X2 [Mus musculus]	790	1	[K].APKISMPEVDLNLKGPK.[V]	APkISMPEVDLNLKGPK	[K3](Biotin)	688.373	3	4303	2	DLHLKAPkISMPEVD	569007630	1	1	0	0	1	1	0	0	521902	39592.6	0	0	1053; 1319	4	2	129; 184; 204; 245; 393; 503; 543; 562; 569; 633; 697; 713; 827; 890; 944; 996; 1011; 1053; 1065; 1183; 1190; 1193; 1252; 1267; 1309; 1316; 1319; 1328; 1384; 1391; 1445; 1507; 1519; 1582; 1628; 1697; 1761; 1775; 1823; 1885; 1889; 1892; 1903; 1966; 2228; 2239; 2302; 2369; 2380; 2497; 2508; 2522; 2556; 2818; 2825; 3024; 3065; 3075; 3086; 3277; 3898; 3964; 3967; 3978; 4120; 4169; 4219; 4226; 4303; 4…
Ahnak	66395	569007630	XP_006527317.1	neuroblast differentiation-associated protein AHNAK isoform X2 [Mus musculus]	790	1	[K].FKVPGVEASGPKIEGNLKGPK.[V]	FKVPGVEASGPkIEGNLKGPK	[K12](Biotin)	595.329	4	4867	3	GVEASGPkIEGNLKG	569007630	1	0	0	0	1	0	0	0	361200	0	0	0	1053; 1319	4	2	129; 184; 204; 245; 393; 503; 543; 562; 569; 633; 697; 713; 827; 890; 944; 996; 1011; 1053; 1065; 1183; 1190; 1193; 1252; 1267; 1309; 1316; 1319; 1328; 1384; 1391; 1445; 1507; 1519; 1582; 1628; 1697; 1761; 1775; 1823; 1885; 1889; 1892; 1903; 1966; 2228; 2239; 2302; 2369; 2380; 2497; 2508; 2522; 2556; 2818; 2825; 3024; 3065; 3075; 3086; 3277; 3898; 3964; 3967; 3978; 4120; 4169; 4219; 4226; 4303; 4…
Ahnak	66395	569007630	XP_006527317.1	neuroblast differentiation-associated protein AHNAK isoform X2 [Mus musculus]	790	1	[K].FKMPFLSISSPK.[V]	FkMPFLSISSPK	[K2](Biotin)	804.422	2	3065	1	KVKGSKFkMPFLSIS	569007630	1	0	0	0	2	0	0	0	217479	0	0	0	1053; 1319	4	2	129; 184; 204; 245; 393; 503; 543; 562; 569; 633; 697; 713; 827; 890; 944; 996; 1011; 1053; 1065; 1183; 1190; 1193; 1252; 1267; 1309; 1316; 1319; 1328; 1384; 1391; 1445; 1507; 1519; 1582; 1628; 1697; 1761; 1775; 1823; 1885; 1889; 1892; 1903; 1966; 2228; 2239; 2302; 2369; 2380; 2497; 2508; 2522; 2556; 2818; 2825; 3024; 3065; 3075; 3086; 3277; 3898; 3964; 3967; 3978; 4120; 4169; 4219; 4226; 4303; 4…
Ahnak	66395	569007630	XP_006527317.1	neuroblast differentiation-associated protein AHNAK isoform X2 [Mus musculus]	790	1	[K].ISMPDLHLKGPK.[V]	ISMPDLHLkGPK	[K9](Biotin)	521.278	3	1328	1	SMPDLHLkGPKVKGD	569007630	1	0	0	0	1	0	0	0	472184	0	0	0	1053; 1319	4	2	129; 184; 204; 245; 393; 503; 543; 562; 569; 633; 697; 713; 827; 890; 944; 996; 1011; 1053; 1065; 1183; 1190; 1193; 1252; 1267; 1309; 1316; 1319; 1328; 1384; 1391; 1445; 1507; 1519; 1582; 1628; 1697; 1761; 1775; 1823; 1885; 1889; 1892; 1903; 1966; 2228; 2239; 2302; 2369; 2380; 2497; 2508; 2522; 2556; 2818; 2825; 3024; 3065; 3075; 3086; 3277; 3898; 3964; 3967; 3978; 4120; 4169; 4219; 4226; 4303; 4…
Ahnak	66395	569007630	XP_006527317.1	neuroblast differentiation-associated protein AHNAK isoform X2 [Mus musculus]	790	1	[K].APKISMPDVDLHLKGPK.[V]	APkISMPDVDLHLKGPK	[K3](Biotin)	522.779	4	1966	2	DMHFKAPkISMPDVD	569007630	1	0	0	0	3	0	0	0	4.23602e+06	0	0	0	1053; 1319	4	2	129; 184; 204; 245; 393; 503; 543; 562; 569; 633; 697; 713; 827; 890; 944; 996; 1011; 1053; 1065; 1183; 1190; 1193; 1252; 1267; 1309; 1316; 1319; 1328; 1384; 1391; 1445; 1507; 1519; 1582; 1628; 1697; 1761; 1775; 1823; 1885; 1889; 1892; 1903; 1966; 2228; 2239; 2302; 2369; 2380; 2497; 2508; 2522; 2556; 2818; 2825; 3024; 3065; 3075; 3086; 3277; 3898; 3964; 3967; 3978; 4120; 4169; 4219; 4226; 4303; 4…
Ahnak	66395	569007630	XP_006527317.1	neuroblast differentiation-associated protein AHNAK isoform X2 [Mus musculus]	790	1	[K].TPKISMPDVDLHIKGPK.[V]	TPkISMPDVDLHIKGPK	[K3](Biotin)	526.284	4	697	2	EVSVKTPkISMPDVD	569007630	1	1	0	0	2	3	0	0	1868351	471850	0	0	1053; 1319	4	2	129; 184; 204; 245; 393; 503; 543; 562; 569; 633; 697; 713; 827; 890; 944; 996; 1011; 1053; 1065; 1183; 1190; 1193; 1252; 1267; 1309; 1316; 1319; 1328; 1384; 1391; 1445; 1507; 1519; 1582; 1628; 1697; 1761; 1775; 1823; 1885; 1889; 1892; 1903; 1966; 2228; 2239; 2302; 2369; 2380; 2497; 2508; 2522; 2556; 2818; 2825; 3024; 3065; 3075; 3086; 3277; 3898; 3964; 3967; 3978; 4120; 4169; 4219; 4226; 4303; 4…
Ahnak	66395	569007630	XP_006527317.1	neuroblast differentiation-associated protein AHNAK isoform X2 [Mus musculus]	790	1	[K].GDVKGPQMAVKGSR.[V]	GDVKGPQMAVkGSR	[K11](Biotin)	552.617	3	543	2	KGPQMAVkGSRVDIE	569007630	1	1	0	0	1	1	0	0	565561	56085	0	0	1053; 1319	4	2	129; 184; 204; 245; 393; 503; 543; 562; 569; 633; 697; 713; 827; 890; 944; 996; 1011; 1053; 1065; 1183; 1190; 1193; 1252; 1267; 1309; 1316; 1319; 1328; 1384; 1391; 1445; 1507; 1519; 1582; 1628; 1697; 1761; 1775; 1823; 1885; 1889; 1892; 1903; 1966; 2228; 2239; 2302; 2369; 2380; 2497; 2508; 2522; 2556; 2818; 2825; 3024; 3065; 3075; 3086; 3277; 3898; 3964; 3967; 3978; 4120; 4169; 4219; 4226; 4303; 4…
Ahnak	66395	569007630	XP_006527317.1	neuroblast differentiation-associated protein AHNAK isoform X2 [Mus musculus]	790	1	[K].MDISAPDVDVHGPDWHLKMPK.[V]	MDISAPDVDVHGPDWHLkMPK	[K18](Biotin)	654.312	4	3898	1	HGPDWHLkMPKVKMP	569007630	1	1	0	0	1	1	0	0	852503	137114	0	0	1053; 1319	4	2	129; 184; 204; 245; 393; 503; 543; 562; 569; 633; 697; 713; 827; 890; 944; 996; 1011; 1053; 1065; 1183; 1190; 1193; 1252; 1267; 1309; 1316; 1319; 1328; 1384; 1391; 1445; 1507; 1519; 1582; 1628; 1697; 1761; 1775; 1823; 1885; 1889; 1892; 1903; 1966; 2228; 2239; 2302; 2369; 2380; 2497; 2508; 2522; 2556; 2818; 2825; 3024; 3065; 3075; 3086; 3277; 3898; 3964; 3967; 3978; 4120; 4169; 4219; 4226; 4303; 4…
Ahnak	66395	569007630	XP_006527317.1	neuroblast differentiation-associated protein AHNAK isoform X2 [Mus musculus]	790	1	[K].TPKISMPDIDLHLKSPK.[I]	TPkISMPDIDLHLKSPK	[K3](Biotin)	537.29	4	2302	2	DMHFKTPkISMPDID	569007630	1	1	0	0	1	2	0	0	969894	301981	0	0	1053; 1319	4	2	129; 184; 204; 245; 393; 503; 543; 562; 569; 633; 697; 713; 827; 890; 944; 996; 1011; 1053; 1065; 1183; 1190; 1193; 1252; 1267; 1309; 1316; 1319; 1328; 1384; 1391; 1445; 1507; 1519; 1582; 1628; 1697; 1761; 1775; 1823; 1885; 1889; 1892; 1903; 1966; 2228; 2239; 2302; 2369; 2380; 2497; 2508; 2522; 2556; 2818; 2825; 3024; 3065; 3075; 3086; 3277; 3898; 3964; 3967; 3978; 4120; 4169; 4219; 4226; 4303; 4…
Ahnak	66395	569007630	XP_006527317.1	neuroblast differentiation-associated protein AHNAK isoform X2 [Mus musculus]	790	1	[K].ISMPEIDLNLKGPK.[L]	ISMPEIDLNLkGPK	[K11](Biotin)	890.972	2	3978	1	PEIDLNLkGPKLKGD	569007630	1	0	0	0	2	0	0	0	267980	0	0	0	1053; 1319	4	2	129; 184; 204; 245; 393; 503; 543; 562; 569; 633; 697; 713; 827; 890; 944; 996; 1011; 1053; 1065; 1183; 1190; 1193; 1252; 1267; 1309; 1316; 1319; 1328; 1384; 1391; 1445; 1507; 1519; 1582; 1628; 1697; 1761; 1775; 1823; 1885; 1889; 1892; 1903; 1966; 2228; 2239; 2302; 2369; 2380; 2497; 2508; 2522; 2556; 2818; 2825; 3024; 3065; 3075; 3086; 3277; 3898; 3964; 3967; 3978; 4120; 4169; 4219; 4226; 4303; 4…
Ahnak	66395	569007630	XP_006527317.1	neuroblast differentiation-associated protein AHNAK isoform X2 [Mus musculus]	790	1	[K].LAGNLHFSGPKIEGDVK.[G]	LAGNLHFSGPkIEGDVK	[K11](Biotin)	670.015	3	5329	1	NLHFSGPkIEGDVKG	569007630	1	1	0	0	1	1	0	0	814985	43160	0	0	1053; 1319	4	2	129; 184; 204; 245; 393; 503; 543; 562; 569; 633; 697; 713; 827; 890; 944; 996; 1011; 1053; 1065; 1183; 1190; 1193; 1252; 1267; 1309; 1316; 1319; 1328; 1384; 1391; 1445; 1507; 1519; 1582; 1628; 1697; 1761; 1775; 1823; 1885; 1889; 1892; 1903; 1966; 2228; 2239; 2302; 2369; 2380; 2497; 2508; 2522; 2556; 2818; 2825; 3024; 3065; 3075; 3086; 3277; 3898; 3964; 3967; 3978; 4120; 4169; 4219; 4226; 4303; 4…
Ahnak	66395	569007630	XP_006527317.1	neuroblast differentiation-associated protein AHNAK isoform X2 [Mus musculus]	790	1	[K].FKMPEMNIK.[AP]	FkMPEMNIK	[K2](Biotin)	682.333	2	1309	1	KLKGPKFkMPEMNIK	569007630	1	1	0	0	1	2	0	0	992612	183454	0	0	1053; 1319	4	2	129; 184; 204; 245; 393; 503; 543; 562; 569; 633; 697; 713; 827; 890; 944; 996; 1011; 1053; 1065; 1183; 1190; 1193; 1252; 1267; 1309; 1316; 1319; 1328; 1384; 1391; 1445; 1507; 1519; 1582; 1628; 1697; 1761; 1775; 1823; 1885; 1889; 1892; 1903; 1966; 2228; 2239; 2302; 2369; 2380; 2497; 2508; 2522; 2556; 2818; 2825; 3024; 3065; 3075; 3086; 3277; 3898; 3964; 3967; 3978; 4120; 4169; 4219; 4226; 4303; 4…
Ahnak	66395	569007630	XP_006527317.1	neuroblast differentiation-associated protein AHNAK isoform X2 [Mus musculus]	790	1	[K].ISMPDFDLHLKGPK.[V]	ISMPDFDLHLkGPK	[K11](Biotin)	608.645	3	2380	1	PDFDLHLkGPKVKGD	569007630	1	0	0	0	1	0	0	0	469046	0	0	0	1053; 1319	4	2	129; 184; 204; 245; 393; 503; 543; 562; 569; 633; 697; 713; 827; 890; 944; 996; 1011; 1053; 1065; 1183; 1190; 1193; 1252; 1267; 1309; 1316; 1319; 1328; 1384; 1391; 1445; 1507; 1519; 1582; 1628; 1697; 1761; 1775; 1823; 1885; 1889; 1892; 1903; 1966; 2228; 2239; 2302; 2369; 2380; 2497; 2508; 2522; 2556; 2818; 2825; 3024; 3065; 3075; 3086; 3277; 3898; 3964; 3967; 3978; 4120; 4169; 4219; 4226; 4303; 4…
Ahnak	66395	569007630	XP_006527317.1	neuroblast differentiation-associated protein AHNAK isoform X2 [Mus musculus]	790	1	[K].VDVSVPDVDVHGPDWNLKMPK.[I]	VDVSVPDVDVHGPDWNLkMPK	[K18](Biotin)	858.424	3	996	1	HGPDWNLkMPKIKMP	569007630	1	1	0	0	1	1	0	0	999668	57184.2	0	0	1053; 1319	4	2	129; 184; 204; 245; 393; 503; 543; 562; 569; 633; 697; 713; 827; 890; 944; 996; 1011; 1053; 1065; 1183; 1190; 1193; 1252; 1267; 1309; 1316; 1319; 1328; 1384; 1391; 1445; 1507; 1519; 1582; 1628; 1697; 1761; 1775; 1823; 1885; 1889; 1892; 1903; 1966; 2228; 2239; 2302; 2369; 2380; 2497; 2508; 2522; 2556; 2818; 2825; 3024; 3065; 3075; 3086; 3277; 3898; 3964; 3967; 3978; 4120; 4169; 4219; 4226; 4303; 4…
Ahnak	66395	569007630	XP_006527317.1	neuroblast differentiation-associated protein AHNAK isoform X2 [Mus musculus]	790	1	[K].FSMPGFKGEGPEVDVNLPK.[A]	FSMPGFkGEGPEVDVNLPK	[K7](Biotin)	758.704	3	2825	1	KFSMPGFkGEGPEVD	569007630	1	1	0	0	2	1	0	0	2.22867e+06	93414.7	0	0	1053; 1319	4	2	129; 184; 204; 245; 393; 503; 543; 562; 569; 633; 697; 713; 827; 890; 944; 996; 1011; 1053; 1065; 1183; 1190; 1193; 1252; 1267; 1309; 1316; 1319; 1328; 1384; 1391; 1445; 1507; 1519; 1582; 1628; 1697; 1761; 1775; 1823; 1885; 1889; 1892; 1903; 1966; 2228; 2239; 2302; 2369; 2380; 2497; 2508; 2522; 2556; 2818; 2825; 3024; 3065; 3075; 3086; 3277; 3898; 3964; 3967; 3978; 4120; 4169; 4219; 4226; 4303; 4…
Ahnak	66395	569007630	XP_006527317.1	neuroblast differentiation-associated protein AHNAK isoform X2 [Mus musculus]	790	1	[K].LNIKAAK.[I]	LNIkAAK	[K4](Biotin)	492.289	2	1889	1	KMPKLNIkAAKISMP	569007630	1	0	0	0	1	0	0	0	522874	0	0	0	1053; 1319	4	2	129; 184; 204; 245; 393; 503; 543; 562; 569; 633; 697; 713; 827; 890; 944; 996; 1011; 1053; 1065; 1183; 1190; 1193; 1252; 1267; 1309; 1316; 1319; 1328; 1384; 1391; 1445; 1507; 1519; 1582; 1628; 1697; 1761; 1775; 1823; 1885; 1889; 1892; 1903; 1966; 2228; 2239; 2302; 2369; 2380; 2497; 2508; 2522; 2556; 2818; 2825; 3024; 3065; 3075; 3086; 3277; 3898; 3964; 3967; 3978; 4120; 4169; 4219; 4226; 4303; 4…
Ahnak	66395	569007630	XP_006527317.1	neuroblast differentiation-associated protein AHNAK isoform X2 [Mus musculus]	790	1	[K].VDIDVPDVDVHGPDWHLKMPK.[IV]	VDIDVPDVDVHGPDWHLKMPK	[K](Biotin)			X	1
Ahnak	66395	569007630	XP_006527317.1	neuroblast differentiation-associated protein AHNAK isoform X2 [Mus musculus]	790	1	[K].GVGGKVHIGADGVK.[M]	GVGGkVHIGADGVK	[K5](Biotin)	507.274	3	5050	1	DLKGVGGkVHIGADG	569007630	1	1	0	0	1	1	0	0	1.24596e+06	91667.5	0	0	1053; 1319	4	2	129; 184; 204; 245; 393; 503; 543; 562; 569; 633; 697; 713; 827; 890; 944; 996; 1011; 1053; 1065; 1183; 1190; 1193; 1252; 1267; 1309; 1316; 1319; 1328; 1384; 1391; 1445; 1507; 1519; 1582; 1628; 1697; 1761; 1775; 1823; 1885; 1889; 1892; 1903; 1966; 2228; 2239; 2302; 2369; 2380; 2497; 2508; 2522; 2556; 2818; 2825; 3024; 3065; 3075; 3086; 3277; 3898; 3964; 3967; 3978; 4120; 4169; 4219; 4226; 4303; 4…
Ahnak	66395	569007630	XP_006527317.1	neuroblast differentiation-associated protein AHNAK isoform X2 [Mus musculus]	790	1	[K].APKISMPDVDLELKGPK.[V]	APkISMPDVDLELKGPK	[K3](Biotin)	688.701	3	4559	2	EINIKAPkISMPDVD	569007630	1	1	0	0	1	1	0	0	940696	48121.3	0	0	1053; 1319	4	2	129; 184; 204; 245; 393; 503; 543; 562; 569; 633; 697; 713; 827; 890; 944; 996; 1011; 1053; 1065; 1183; 1190; 1193; 1252; 1267; 1309; 1316; 1319; 1328; 1384; 1391; 1445; 1507; 1519; 1582; 1628; 1697; 1761; 1775; 1823; 1885; 1889; 1892; 1903; 1966; 2228; 2239; 2302; 2369; 2380; 2497; 2508; 2522; 2556; 2818; 2825; 3024; 3065; 3075; 3086; 3277; 3898; 3964; 3967; 3978; 4120; 4169; 4219; 4226; 4303; 4…
Ahnak	66395	569007630	XP_006527317.1	neuroblast differentiation-associated protein AHNAK isoform X2 [Mus musculus]	790	1	[K].APKISMPDFDLHLKGPK.[V]	APkISMPDFDLHLKGPK	[K3](Biotin)	530.782	4	2369	2	EMNIKAPkISMPDFD	569007630	1	1	0	0	1	1	0	0	1.33211e+06	219666	0	0	1053; 1319	4	2	129; 184; 204; 245; 393; 503; 543; 562; 569; 633; 697; 713; 827; 890; 944; 996; 1011; 1053; 1065; 1183; 1190; 1193; 1252; 1267; 1309; 1316; 1319; 1328; 1384; 1391; 1445; 1507; 1519; 1582; 1628; 1697; 1761; 1775; 1823; 1885; 1889; 1892; 1903; 1966; 2228; 2239; 2302; 2369; 2380; 2497; 2508; 2522; 2556; 2818; 2825; 3024; 3065; 3075; 3086; 3277; 3898; 3964; 3967; 3978; 4120; 4169; 4219; 4226; 4303; 4…
Ahnak	66395	569007630	XP_006527317.1	neuroblast differentiation-associated protein AHNAK isoform X2 [Mus musculus]	790	1	[K].VDISAPDVDVHGPDWHLKMPK.[V]	VDISAPDVDVHGPDWHLkMPK	[K18](Biotin)	646.319	4	4362	1	HGPDWHLkMPKVKMP	569007630	1	1	0	0	1	1	0	0	1.28725e+06	0	0	0	1053; 1319	4	2	129; 184; 204; 245; 393; 503; 543; 562; 569; 633; 697; 713; 827; 890; 944; 996; 1011; 1053; 1065; 1183; 1190; 1193; 1252; 1267; 1309; 1316; 1319; 1328; 1384; 1391; 1445; 1507; 1519; 1582; 1628; 1697; 1761; 1775; 1823; 1885; 1889; 1892; 1903; 1966; 2228; 2239; 2302; 2369; 2380; 2497; 2508; 2522; 2556; 2818; 2825; 3024; 3065; 3075; 3086; 3277; 3898; 3964; 3967; 3978; 4120; 4169; 4219; 4226; 4303; 4…
Ahnak	66395	569007630	XP_006527317.1	neuroblast differentiation-associated protein AHNAK isoform X2 [Mus musculus]	790	1	[K].FKMPDMHFKAPK.[I]	FKMPDMHFKAPK	[K](Biotin)			X	2
Ahnak	66395	569007630	XP_006527317.1	neuroblast differentiation-associated protein AHNAK isoform X2 [Mus musculus]	790	1	[K].VKGDVDASLPKMEGELKGPGIDIK.[C]	VKGDVDASLPkMEGELKGPGIDIK	[K11](Biotin)	681.359	4	4120	3	DVDASLPkMEGELKG	569007630	1	0	0	0	1	0	0	0	203499	0	0	0	1053; 1319	4	2	129; 184; 204; 245; 393; 503; 543; 562; 569; 633; 697; 713; 827; 890; 944; 996; 1011; 1053; 1065; 1183; 1190; 1193; 1252; 1267; 1309; 1316; 1319; 1328; 1384; 1391; 1445; 1507; 1519; 1582; 1628; 1697; 1761; 1775; 1823; 1885; 1889; 1892; 1903; 1966; 2228; 2239; 2302; 2369; 2380; 2497; 2508; 2522; 2556; 2818; 2825; 3024; 3065; 3075; 3086; 3277; 3898; 3964; 3967; 3978; 4120; 4169; 4219; 4226; 4303; 4…
Ahnak	66395	569007630	XP_006527317.1	neuroblast differentiation-associated protein AHNAK isoform X2 [Mus musculus]	790	1	[K].VDINAPDVDVRGPDWHLKMPK.[VM]	VDINAPDVDVRGPDWHLkMPK	[K18](Biotin)	657.833	4	1823	2	RGPDWHLkMPKVKMP	569007630	1	1	0	0	1	1	0	0	698646	76434.4	0	0	1053; 1319	4	2	129; 184; 204; 245; 393; 503; 543; 562; 569; 633; 697; 713; 827; 890; 944; 996; 1011; 1053; 1065; 1183; 1190; 1193; 1252; 1267; 1309; 1316; 1319; 1328; 1384; 1391; 1445; 1507; 1519; 1582; 1628; 1697; 1761; 1775; 1823; 1885; 1889; 1892; 1903; 1966; 2228; 2239; 2302; 2369; 2380; 2497; 2508; 2522; 2556; 2818; 2825; 3024; 3065; 3075; 3086; 3277; 3898; 3964; 3967; 3978; 4120; 4169; 4219; 4226; 4303; 4…
Ahnak	66395	569007630	XP_006527317.1	neuroblast differentiation-associated protein AHNAK isoform X2 [Mus musculus]	790	1	[R].VDIETPNLEGTLTGPKISSPSGK.[I]	VDIETPNLEGTLTGPkISSPSGK	[K16](Biotin)	856.109	3	562	1	EGTLTGPkISSPSGK	569007630	1	0	0	0	1	0	0	0	166613	0	0	0	1053; 1319	4	2	129; 184; 204; 245; 393; 503; 543; 562; 569; 633; 697; 713; 827; 890; 944; 996; 1011; 1053; 1065; 1183; 1190; 1193; 1252; 1267; 1309; 1316; 1319; 1328; 1384; 1391; 1445; 1507; 1519; 1582; 1628; 1697; 1761; 1775; 1823; 1885; 1889; 1892; 1903; 1966; 2228; 2239; 2302; 2369; 2380; 2497; 2508; 2522; 2556; 2818; 2825; 3024; 3065; 3075; 3086; 3277; 3898; 3964; 3967; 3978; 4120; 4169; 4219; 4226; 4303; 4…
Ahnak	66395	569007630	XP_006527317.1	neuroblast differentiation-associated protein AHNAK isoform X2 [Mus musculus]	790	1	[R].EVGVDVNFPKVEANVQAGAGEGKWEESEVK.[L]	EVGVDVNFPkVEANVQAGAGEGKWEESEVK	[K10](Biotin)	1143.22	3	5392	2	GVDVNFPkVEANVQA	569007630	1	0	0	0	2	0	0	0	1.14286e+06	0	0	0	1053; 1319	4	2	129; 184; 204; 245; 393; 503; 543; 562; 569; 633; 697; 713; 827; 890; 944; 996; 1011; 1053; 1065; 1183; 1190; 1193; 1252; 1267; 1309; 1316; 1319; 1328; 1384; 1391; 1445; 1507; 1519; 1582; 1628; 1697; 1761; 1775; 1823; 1885; 1889; 1892; 1903; 1966; 2228; 2239; 2302; 2369; 2380; 2497; 2508; 2522; 2556; 2818; 2825; 3024; 3065; 3075; 3086; 3277; 3898; 3964; 3967; 3978; 4120; 4169; 4219; 4226; 4303; 4…
Ahnak	66395	569007630	XP_006527317.1	neuroblast differentiation-associated protein AHNAK isoform X2 [Mus musculus]	790	1	[K].FGMPGFKAESPEMEVNLPK.[S]	FGMPGFkAESPEMEVNLPK	[K7](Biotin)	778.704	3	890	1	KFGMPGFkAESPEME	569007630	1	0	0	0	1	0	0	0	123655	0	0	0	1053; 1319	4	2	129; 184; 204; 245; 393; 503; 543; 562; 569; 633; 697; 713; 827; 890; 944; 996; 1011; 1053; 1065; 1183; 1190; 1193; 1252; 1267; 1309; 1316; 1319; 1328; 1384; 1391; 1445; 1507; 1519; 1582; 1628; 1697; 1761; 1775; 1823; 1885; 1889; 1892; 1903; 1966; 2228; 2239; 2302; 2369; 2380; 2497; 2508; 2522; 2556; 2818; 2825; 3024; 3065; 3075; 3086; 3277; 3898; 3964; 3967; 3978; 4120; 4169; 4219; 4226; 4303; 4…
Ahnak	66395	569007630	XP_006527317.1	neuroblast differentiation-associated protein AHNAK isoform X2 [Mus musculus]	790	1	[K].GPKVDIDVPDVDVHGPDWHLKMPK.[IV]	GPKVDIDVPDVDVHGPDWHLkMPK	[K21](Biotin)	584.896	5	2556	2	HGPDWHLkMPKIKMP	569007630	1	1	0	0	2	1	0	0	2.88126e+06	123122	0	0	1053; 1319	4	2	129; 184; 204; 245; 393; 503; 543; 562; 569; 633; 697; 713; 827; 890; 944; 996; 1011; 1053; 1065; 1183; 1190; 1193; 1252; 1267; 1309; 1316; 1319; 1328; 1384; 1391; 1445; 1507; 1519; 1582; 1628; 1697; 1761; 1775; 1823; 1885; 1889; 1892; 1903; 1966; 2228; 2239; 2302; 2369; 2380; 2497; 2508; 2522; 2556; 2818; 2825; 3024; 3065; 3075; 3086; 3277; 3898; 3964; 3967; 3978; 4120; 4169; 4219; 4226; 4303; 4…
Ahnak	66395	569007630	XP_006527317.1	neuroblast differentiation-associated protein AHNAK isoform X2 [Mus musculus]	790	1	[K].VGIDAPDVEVHGPDWHLKMPKVK.[M]	VGIDAPDVEVHGPDWHLKMPkVK	[K21](Biotin)	559.49	5	1507	2	DWHLKMPkVKMPKFS	569007630	1	0	0	0	1	0	0	0	400957	0	0	0	1053; 1319	4	2	129; 184; 204; 245; 393; 503; 543; 562; 569; 633; 697; 713; 827; 890; 944; 996; 1011; 1053; 1065; 1183; 1190; 1193; 1252; 1267; 1309; 1316; 1319; 1328; 1384; 1391; 1445; 1507; 1519; 1582; 1628; 1697; 1761; 1775; 1823; 1885; 1889; 1892; 1903; 1966; 2228; 2239; 2302; 2369; 2380; 2497; 2508; 2522; 2556; 2818; 2825; 3024; 3065; 3075; 3086; 3277; 3898; 3964; 3967; 3978; 4120; 4169; 4219; 4226; 4303; 4…
Ahnak	66395	569007630	XP_006527317.1	neuroblast differentiation-associated protein AHNAK isoform X2 [Mus musculus]	790	1	[K].VGIDAPDVEVHGPDWHLKMPK.[V]	VGIDAPDVEVHGPDWHLKMPK	[K](Biotin)			X	1
Ahnak	66395	569007630	XP_006527317.1	neuroblast differentiation-associated protein AHNAK isoform X2 [Mus musculus]	790	1	[K].GPKVEAPDVEVHGPDWHLKMPK.[V]	GPKVEAPDVEVHGPDWHLkMPK	[K19](Biotin)	539.273	5	1628	2	HGPDWHLkMPKVKMP	569007630	1	1	0	0	1	1	0	0	601066	51288	0	0	1053; 1319	4	2	129; 184; 204; 245; 393; 503; 543; 562; 569; 633; 697; 713; 827; 890; 944; 996; 1011; 1053; 1065; 1183; 1190; 1193; 1252; 1267; 1309; 1316; 1319; 1328; 1384; 1391; 1445; 1507; 1519; 1582; 1628; 1697; 1761; 1775; 1823; 1885; 1889; 1892; 1903; 1966; 2228; 2239; 2302; 2369; 2380; 2497; 2508; 2522; 2556; 2818; 2825; 3024; 3065; 3075; 3086; 3277; 3898; 3964; 3967; 3978; 4120; 4169; 4219; 4226; 4303; 4…
Ahnak	66395	569007630	XP_006527317.1	neuroblast differentiation-associated protein AHNAK isoform X2 [Mus musculus]	790	1	[K].FSMPGFKAEGPEVDVNLPK.[AV]	FSMPGFkAEGPEVDVNLPK	[K7](Biotin)	763.376	3	1391	1	KFSMPGFkAEGPEVD	569007630	1	0	0	0	1	0	0	0	994847	0	0	0	1053; 1319	4	2	129; 184; 204; 245; 393; 503; 543; 562; 569; 633; 697; 713; 827; 890; 944; 996; 1011; 1053; 1065; 1183; 1190; 1193; 1252; 1267; 1309; 1316; 1319; 1328; 1384; 1391; 1445; 1507; 1519; 1582; 1628; 1697; 1761; 1775; 1823; 1885; 1889; 1892; 1903; 1966; 2228; 2239; 2302; 2369; 2380; 2497; 2508; 2522; 2556; 2818; 2825; 3024; 3065; 3075; 3086; 3277; 3898; 3964; 3967; 3978; 4120; 4169; 4219; 4226; 4303; 4…
Ahnak	66395	569007630	XP_006527317.1	neuroblast differentiation-associated protein AHNAK isoform X2 [Mus musculus]	790	1	[R].EGVKDIDITSPEFMIKIPR.[H]	EGVKDIDITSPEFMIkIPR	[K16](Biotin)	805.421	3	184	2	TSPEFMIkIPRHEVT	569007630	1	0	0	0	1	0	0	0	204462	0	0	0	1053; 1319	4	2	129; 184; 204; 245; 393; 503; 543; 562; 569; 633; 697; 713; 827; 890; 944; 996; 1011; 1053; 1065; 1183; 1190; 1193; 1252; 1267; 1309; 1316; 1319; 1328; 1384; 1391; 1445; 1507; 1519; 1582; 1628; 1697; 1761; 1775; 1823; 1885; 1889; 1892; 1903; 1966; 2228; 2239; 2302; 2369; 2380; 2497; 2508; 2522; 2556; 2818; 2825; 3024; 3065; 3075; 3086; 3277; 3898; 3964; 3967; 3978; 4120; 4169; 4219; 4226; 4303; 4…
Ahnak	66395	569007630	XP_006527317.1	neuroblast differentiation-associated protein AHNAK isoform X2 [Mus musculus]	790	1	[K].TPKVGISAPK.[L]	TPkVGISAPK	[K3](Biotin)	612.345	2	4640	1	NVHLKTPkVGISAPK	569007630	1	1	0	0	1	1	0	0	517272	36534.3	0	0	1053; 1319	4	2	129; 184; 204; 245; 393; 503; 543; 562; 569; 633; 697; 713; 827; 890; 944; 996; 1011; 1053; 1065; 1183; 1190; 1193; 1252; 1267; 1309; 1316; 1319; 1328; 1384; 1391; 1445; 1507; 1519; 1582; 1628; 1697; 1761; 1775; 1823; 1885; 1889; 1892; 1903; 1966; 2228; 2239; 2302; 2369; 2380; 2497; 2508; 2522; 2556; 2818; 2825; 3024; 3065; 3075; 3086; 3277; 3898; 3964; 3967; 3978; 4120; 4169; 4219; 4226; 4303; 4…
Ahnak	66395	569007630	XP_006527317.1	neuroblast differentiation-associated protein AHNAK isoform X2 [Mus musculus]	790	1	[R].HEVTEISNTDVETQPGKTVIR.[L]	HEVTEISNTDVETQPGkTVIR	[K17](Biotin)	860.434	3	204	1	DVETQPGkTVIRLPS	569007630	0	1	0	0	0	1	0	0	0	72672.4	0	0	1053; 1319	4	2	129; 184; 204; 245; 393; 503; 543; 562; 569; 633; 697; 713; 827; 890; 944; 996; 1011; 1053; 1065; 1183; 1190; 1193; 1252; 1267; 1309; 1316; 1319; 1328; 1384; 1391; 1445; 1507; 1519; 1582; 1628; 1697; 1761; 1775; 1823; 1885; 1889; 1892; 1903; 1966; 2228; 2239; 2302; 2369; 2380; 2497; 2508; 2522; 2556; 2818; 2825; 3024; 3065; 3075; 3086; 3277; 3898; 3964; 3967; 3978; 4120; 4169; 4219; 4226; 4303; 4…
Ahnak	66395	569007630	XP_006527317.1	neuroblast differentiation-associated protein AHNAK isoform X2 [Mus musculus]	790	1	[K].TPKISMPDIDLHLK.[S]	TPkISMPDIDLHLK	[K3](Biotin)	611.992	3	2302	1	DMHFKTPkISMPDID	569007630	0	1	0	0	0	1	0	0	0	44406.6	0	0	1053; 1319	4	2	129; 184; 204; 245; 393; 503; 543; 562; 569; 633; 697; 713; 827; 890; 944; 996; 1011; 1053; 1065; 1183; 1190; 1193; 1252; 1267; 1309; 1316; 1319; 1328; 1384; 1391; 1445; 1507; 1519; 1582; 1628; 1697; 1761; 1775; 1823; 1885; 1889; 1892; 1903; 1966; 2228; 2239; 2302; 2369; 2380; 2497; 2508; 2522; 2556; 2818; 2825; 3024; 3065; 3075; 3086; 3277; 3898; 3964; 3967; 3978; 4120; 4169; 4219; 4226; 4303; 4…
Ahnak	66395	569007630	XP_006527317.1	neuroblast differentiation-associated protein AHNAK isoform X2 [Mus musculus]	790	1	[K].VKTPEMIIQKPK.[I]	VKTPEMIIQkPK	[K10](Biotin)	546.642	3	503	1	TPEMIIQkPKISMQD	569007630	1	1	0	0	1	1	0	0	428070	38566.9	0	0	1053; 1319	4	2	129; 184; 204; 245; 393; 503; 543; 562; 569; 633; 697; 713; 827; 890; 944; 996; 1011; 1053; 1065; 1183; 1190; 1193; 1252; 1267; 1309; 1316; 1319; 1328; 1384; 1391; 1445; 1507; 1519; 1582; 1628; 1697; 1761; 1775; 1823; 1885; 1889; 1892; 1903; 1966; 2228; 2239; 2302; 2369; 2380; 2497; 2508; 2522; 2556; 2818; 2825; 3024; 3065; 3075; 3086; 3277; 3898; 3964; 3967; 3978; 4120; 4169; 4219; 4226; 4303; 4…
Ahnak	66395	569007630	XP_006527317.1	neuroblast differentiation-associated protein AHNAK isoform X2 [Mus musculus]	790	1	[R].AGAISASGPELEGAGHSKFQVTVPGAK.[V]	AGAISASGPELEGAGHSkFQVTVPGAK	[K18](Biotin)	931.472	3	245	1	LEGAGHSkFQVTVPG	569007630	1	1	0	0	1	2	0	0	576482	270552	0	0	1053; 1319	4	2	129; 184; 204; 245; 393; 503; 543; 562; 569; 633; 697; 713; 827; 890; 944; 996; 1011; 1053; 1065; 1183; 1190; 1193; 1252; 1267; 1309; 1316; 1319; 1328; 1384; 1391; 1445; 1507; 1519; 1582; 1628; 1697; 1761; 1775; 1823; 1885; 1889; 1892; 1903; 1966; 2228; 2239; 2302; 2369; 2380; 2497; 2508; 2522; 2556; 2818; 2825; 3024; 3065; 3075; 3086; 3277; 3898; 3964; 3967; 3978; 4120; 4169; 4219; 4226; 4303; 4…
Ahnak	66395	569007630	XP_006527317.1	neuroblast differentiation-associated protein AHNAK isoform X2 [Mus musculus]	790	1	[K].TMFGKMYFPDVEFDIKSPK.[F]	TMFGkMYFPDVEFDIKSPK	[K5](Biotin)	836.067	3	4800	2	VKKTMFGkMYFPDVE	569007630	1	0	0	0	1	0	0	0	209387	0	0	0	1053; 1319	4	2	129; 184; 204; 245; 393; 503; 543; 562; 569; 633; 697; 713; 827; 890; 944; 996; 1011; 1053; 1065; 1183; 1190; 1193; 1252; 1267; 1309; 1316; 1319; 1328; 1384; 1391; 1445; 1507; 1519; 1582; 1628; 1697; 1761; 1775; 1823; 1885; 1889; 1892; 1903; 1966; 2228; 2239; 2302; 2369; 2380; 2497; 2508; 2522; 2556; 2818; 2825; 3024; 3065; 3075; 3086; 3277; 3898; 3964; 3967; 3978; 4120; 4169; 4219; 4226; 4303; 4…
Ahnak	66395	569007630	XP_006527317.1	neuroblast differentiation-associated protein AHNAK isoform X2 [Mus musculus]	790	1	[K].MPKFSMPGFKGEGPEVDVNLPK.[A]	MPkFSMPGFKGEGPEVDVNLPK	[K3](Biotin)	877.434	3	2818	2	MPKVKMPkFSMPGFK	569007630	1	0	0	0	1	0	0	0	282417	0	0	0	1053; 1319	4	2	129; 184; 204; 245; 393; 503; 543; 562; 569; 633; 697; 713; 827; 890; 944; 996; 1011; 1053; 1065; 1183; 1190; 1193; 1252; 1267; 1309; 1316; 1319; 1328; 1384; 1391; 1445; 1507; 1519; 1582; 1628; 1697; 1761; 1775; 1823; 1885; 1889; 1892; 1903; 1966; 2228; 2239; 2302; 2369; 2380; 2497; 2508; 2522; 2556; 2818; 2825; 3024; 3065; 3075; 3086; 3277; 3898; 3964; 3967; 3978; 4120; 4169; 4219; 4226; 4303; 4…
Ahnak	66395	569007630	XP_006527317.1	neuroblast differentiation-associated protein AHNAK isoform X2 [Mus musculus]	790	1	[K].MPKFSMPGFKAEGPEVDVNLPK.[AV]	MPkFSMPGFKAEGPEVDVNLPK	[K3](Biotin)	882.104	3	1384	2	MPKMKMPkFSMPGFK	569007630	1	0	0	0	1	0	0	0	363422	0	0	0	1053; 1319	4	2	129; 184; 204; 245; 393; 503; 543; 562; 569; 633; 697; 713; 827; 890; 944; 996; 1011; 1053; 1065; 1183; 1190; 1193; 1252; 1267; 1309; 1316; 1319; 1328; 1384; 1391; 1445; 1507; 1519; 1582; 1628; 1697; 1761; 1775; 1823; 1885; 1889; 1892; 1903; 1966; 2228; 2239; 2302; 2369; 2380; 2497; 2508; 2522; 2556; 2818; 2825; 3024; 3065; 3075; 3086; 3277; 3898; 3964; 3967; 3978; 4120; 4169; 4219; 4226; 4303; 4…
Ahnak	66395	569007630	XP_006527317.1	neuroblast differentiation-associated protein AHNAK isoform X2 [Mus musculus]	790	1	[K].MPDLHLKAPK.[I]	MPDLHLkAPK	[K7](Biotin)	459.246	3	3964	1	KMPDLHLkAPKISMP	569007630	1	0	0	0	1	0	0	0	147218	0	0	0	1053; 1319	4	2	129; 184; 204; 245; 393; 503; 543; 562; 569; 633; 697; 713; 827; 890; 944; 996; 1011; 1053; 1065; 1183; 1190; 1193; 1252; 1267; 1309; 1316; 1319; 1328; 1384; 1391; 1445; 1507; 1519; 1582; 1628; 1697; 1761; 1775; 1823; 1885; 1889; 1892; 1903; 1966; 2228; 2239; 2302; 2369; 2380; 2497; 2508; 2522; 2556; 2818; 2825; 3024; 3065; 3075; 3086; 3277; 3898; 3964; 3967; 3978; 4120; 4169; 4219; 4226; 4303; 4…
Ahnak	66395	569007630	XP_006527317.1	neuroblast differentiation-associated protein AHNAK isoform X2 [Mus musculus]	790	1	[K].LHAPGLDLKGVGGK.[V]	LHAPGLDLkGVGGK	[K9](Biotin)	529.961	3	5045	1	HAPGLDLkGVGGKVH	569007630	1	0	0	0	1	0	0	0	315840	0	0	0	1053; 1319	4	2	129; 184; 204; 245; 393; 503; 543; 562; 569; 633; 697; 713; 827; 890; 944; 996; 1011; 1053; 1065; 1183; 1190; 1193; 1252; 1267; 1309; 1316; 1319; 1328; 1384; 1391; 1445; 1507; 1519; 1582; 1628; 1697; 1761; 1775; 1823; 1885; 1889; 1892; 1903; 1966; 2228; 2239; 2302; 2369; 2380; 2497; 2508; 2522; 2556; 2818; 2825; 3024; 3065; 3075; 3086; 3277; 3898; 3964; 3967; 3978; 4120; 4169; 4219; 4226; 4303; 4…
Ahnak	66395	569007630	XP_006527317.1	neuroblast differentiation-associated protein AHNAK isoform X2 [Mus musculus]	790	1	[K].APKISMPDVDLHLKGPK.[V]	APkISMPDVDLHLKGPK	[K3](Biotin)	522.779	4	1966	2	DMHFKAPkISMPDVD	569007630	1	0	0	0	3	0	0	0	4.23602e+06	0	0	0	1053; 1319	4	2	129; 184; 204; 245; 393; 503; 543; 562; 569; 633; 697; 713; 827; 890; 944; 996; 1011; 1053; 1065; 1183; 1190; 1193; 1252; 1267; 1309; 1316; 1319; 1328; 1384; 1391; 1445; 1507; 1519; 1582; 1628; 1697; 1761; 1775; 1823; 1885; 1889; 1892; 1903; 1966; 2228; 2239; 2302; 2369; 2380; 2497; 2508; 2522; 2556; 2818; 2825; 3024; 3065; 3075; 3086; 3277; 3898; 3964; 3967; 3978; 4120; 4169; 4219; 4226; 4303; 4…
Ahnak	66395	569007630	XP_006527317.1	neuroblast differentiation-associated protein AHNAK isoform X2 [Mus musculus]	790	1	[K].APKISMPDVDLNIKGPK.[G]	APkISMPDVDLNIKGPK	[K3](Biotin)	683.703	3	1445	2	DMHFKAPkISMPDVD	569007630	1	1	0	0	1	1	0	0	734574	75244.4	0	0	1053; 1319	4	2	129; 184; 204; 245; 393; 503; 543; 562; 569; 633; 697; 713; 827; 890; 944; 996; 1011; 1053; 1065; 1183; 1190; 1193; 1252; 1267; 1309; 1316; 1319; 1328; 1384; 1391; 1445; 1507; 1519; 1582; 1628; 1697; 1761; 1775; 1823; 1885; 1889; 1892; 1903; 1966; 2228; 2239; 2302; 2369; 2380; 2497; 2508; 2522; 2556; 2818; 2825; 3024; 3065; 3075; 3086; 3277; 3898; 3964; 3967; 3978; 4120; 4169; 4219; 4226; 4303; 4…
Ahnak	66395	569007630	XP_006527317.1	neuroblast differentiation-associated protein AHNAK isoform X2 [Mus musculus]	790	1	[K].APKISMPEIDLNLKGPK.[L]	APkISMPEIDLNLKGPK	[K3](Biotin)	693.046	3	3967	2	DLHLKAPkISMPEID	569007630	1	1	0	0	2	1	0	0	850545	27187.6	0	0	1053; 1319	4	2	129; 184; 204; 245; 393; 503; 543; 562; 569; 633; 697; 713; 827; 890; 944; 996; 1011; 1053; 1065; 1183; 1190; 1193; 1252; 1267; 1309; 1316; 1319; 1328; 1384; 1391; 1445; 1507; 1519; 1582; 1628; 1697; 1761; 1775; 1823; 1885; 1889; 1892; 1903; 1966; 2228; 2239; 2302; 2369; 2380; 2497; 2508; 2522; 2556; 2818; 2825; 3024; 3065; 3075; 3086; 3277; 3898; 3964; 3967; 3978; 4120; 4169; 4219; 4226; 4303; 4…
Ahnak	66395	569007630	XP_006527317.1	neuroblast differentiation-associated protein AHNAK isoform X2 [Mus musculus]	790	1	[K].MPKLNIK.[A]	MPkLNIK	[K3](Biotin)	535.299	2	1885	1	GSKFKMPkLNIKAAK	569007630	1	0	0	0	1	0	0	0	391820	0	0	0	1053; 1319	4	2	129; 184; 204; 245; 393; 503; 543; 562; 569; 633; 697; 713; 827; 890; 944; 996; 1011; 1053; 1065; 1183; 1190; 1193; 1252; 1267; 1309; 1316; 1319; 1328; 1384; 1391; 1445; 1507; 1519; 1582; 1628; 1697; 1761; 1775; 1823; 1885; 1889; 1892; 1903; 1966; 2228; 2239; 2302; 2369; 2380; 2497; 2508; 2522; 2556; 2818; 2825; 3024; 3065; 3075; 3086; 3277; 3898; 3964; 3967; 3978; 4120; 4169; 4219; 4226; 4303; 4…
Ahnak	66395	569007630	XP_006527317.1	neuroblast differentiation-associated protein AHNAK isoform X2 [Mus musculus]	790	1	[K].MDISAPDVEVHGPEWNLKMPK.[F]	MDISAPDVEVHGPEWNLkMPK	[K18](Biotin)	873.75	3	633	1	HGPEWNLkMPKFSVP	569007630	1	0	0	0	1	0	0	0	789600	0	0	0	1053; 1319	4	2	129; 184; 204; 245; 393; 503; 543; 562; 569; 633; 697; 713; 827; 890; 944; 996; 1011; 1053; 1065; 1183; 1190; 1193; 1252; 1267; 1309; 1316; 1319; 1328; 1384; 1391; 1445; 1507; 1519; 1582; 1628; 1697; 1761; 1775; 1823; 1885; 1889; 1892; 1903; 1966; 2228; 2239; 2302; 2369; 2380; 2497; 2508; 2522; 2556; 2818; 2825; 3024; 3065; 3075; 3086; 3277; 3898; 3964; 3967; 3978; 4120; 4169; 4219; 4226; 4303; 4…
Ahnak	66395	569007630	XP_006527317.1	neuroblast differentiation-associated protein AHNAK isoform X2 [Mus musculus]	790	1	[K].APKISMPDVDFNLKGPK.[I]	APkISMPDVDFNLKGPK	[K3](Biotin)	695.029	3	2228	2	DMHFKAPkISMPDVD	569007630	1	1	0	0	1	1	0	0	699164	0	0	0	1053; 1319	4	2	129; 184; 204; 245; 393; 503; 543; 562; 569; 633; 697; 713; 827; 890; 944; 996; 1011; 1053; 1065; 1183; 1190; 1193; 1252; 1267; 1309; 1316; 1319; 1328; 1384; 1391; 1445; 1507; 1519; 1582; 1628; 1697; 1761; 1775; 1823; 1885; 1889; 1892; 1903; 1966; 2228; 2239; 2302; 2369; 2380; 2497; 2508; 2522; 2556; 2818; 2825; 3024; 3065; 3075; 3086; 3277; 3898; 3964; 3967; 3978; 4120; 4169; 4219; 4226; 4303; 4…
Ahnak	66395	569007630	XP_006527317.1	neuroblast differentiation-associated protein AHNAK isoform X2 [Mus musculus]	790	1	[K].FKVPDVQFKTPQISMSDIDLNVKGPK.[I]	FKVPDVQFkTPQISMSDIDLNVKGPK	[K9](Biotin)	790.168	4	4226	3	KVPDVQFkTPQISMS	569007630	1	0	0	0	2	0	0	0	601652	0	0	0	1053; 1319	4	2	129; 184; 204; 245; 393; 503; 543; 562; 569; 633; 697; 713; 827; 890; 944; 996; 1011; 1053; 1065; 1183; 1190; 1193; 1252; 1267; 1309; 1316; 1319; 1328; 1384; 1391; 1445; 1507; 1519; 1582; 1628; 1697; 1761; 1775; 1823; 1885; 1889; 1892; 1903; 1966; 2228; 2239; 2302; 2369; 2380; 2497; 2508; 2522; 2556; 2818; 2825; 3024; 3065; 3075; 3086; 3277; 3898; 3964; 3967; 3978; 4120; 4169; 4219; 4226; 4303; 4…
Ahnak	66395	569007630	XP_006527317.1	neuroblast differentiation-associated protein AHNAK isoform X2 [Mus musculus]	790	1	[K].IKFPKFSLPK.[I]	IKFPkFSLPK	[K5](Biotin)	477.613	3	4948	2	EGKIKFPkFSLPKIS	569007630	1	0	0	0	1	0	0	0	158335	0	0	0	1053; 1319	4	2	129; 184; 204; 245; 393; 503; 543; 562; 569; 633; 697; 713; 827; 890; 944; 996; 1011; 1053; 1065; 1183; 1190; 1193; 1252; 1267; 1309; 1316; 1319; 1328; 1384; 1391; 1445; 1507; 1519; 1582; 1628; 1697; 1761; 1775; 1823; 1885; 1889; 1892; 1903; 1966; 2228; 2239; 2302; 2369; 2380; 2497; 2508; 2522; 2556; 2818; 2825; 3024; 3065; 3075; 3086; 3277; 3898; 3964; 3967; 3978; 4120; 4169; 4219; 4226; 4303; 4…
Ahnak	66395	569007630	XP_006527317.1	neuroblast differentiation-associated protein AHNAK isoform X2 [Mus musculus]	790	1	[K].ISMPDVDLHIKGPKVK.[G]	ISMPDVDLHIKGPKVk	[K16](Biotin)	501.527	4	713	2	HIKGPKVkGEYEVTP	569007630	1	0	0	0	1	0	0	0	320311	0	0	0	1053; 1319	4	2	129; 184; 204; 245; 393; 503; 543; 562; 569; 633; 697; 713; 827; 890; 944; 996; 1011; 1053; 1065; 1183; 1190; 1193; 1252; 1267; 1309; 1316; 1319; 1328; 1384; 1391; 1445; 1507; 1519; 1582; 1628; 1697; 1761; 1775; 1823; 1885; 1889; 1892; 1903; 1966; 2228; 2239; 2302; 2369; 2380; 2497; 2508; 2522; 2556; 2818; 2825; 3024; 3065; 3075; 3086; 3277; 3898; 3964; 3967; 3978; 4120; 4169; 4219; 4226; 4303; 4…
Ahnak	66395	569007630	XP_006527317.1	neuroblast differentiation-associated protein AHNAK isoform X2 [Mus musculus]	790	1	[K].ISMPDVDLHLKGPK.[V]	ISMPDVDLHLkGPK	[K11](Biotin)	592.644	3	1775	1	PDVDLHLkGPKVKGD	569007630	1	0	0	0	2	0	0	0	1.05226e+06	0	0	0	1053; 1319	4	2	129; 184; 204; 245; 393; 503; 543; 562; 569; 633; 697; 713; 827; 890; 944; 996; 1011; 1053; 1065; 1183; 1190; 1193; 1252; 1267; 1309; 1316; 1319; 1328; 1384; 1391; 1445; 1507; 1519; 1582; 1628; 1697; 1761; 1775; 1823; 1885; 1889; 1892; 1903; 1966; 2228; 2239; 2302; 2369; 2380; 2497; 2508; 2522; 2556; 2818; 2825; 3024; 3065; 3075; 3086; 3277; 3898; 3964; 3967; 3978; 4120; 4169; 4219; 4226; 4303; 4…
Ahnak	66395	569007630	XP_006527317.1	neuroblast differentiation-associated protein AHNAK isoform X2 [Mus musculus]	790	1	[K].ISMPDVDFNLKGPK.[I]	ISMPDVDFNLkGPK	[K11](Biotin)	596.301	3	2239	1	PDVDFNLkGPKIKGD	569007630	1	0	0	0	1	0	0	0	53870.1	0	0	0	1053; 1319	4	2	129; 184; 204; 245; 393; 503; 543; 562; 569; 633; 697; 713; 827; 890; 944; 996; 1011; 1053; 1065; 1183; 1190; 1193; 1252; 1267; 1309; 1316; 1319; 1328; 1384; 1391; 1445; 1507; 1519; 1582; 1628; 1697; 1761; 1775; 1823; 1885; 1889; 1892; 1903; 1966; 2228; 2239; 2302; 2369; 2380; 2497; 2508; 2522; 2556; 2818; 2825; 3024; 3065; 3075; 3086; 3277; 3898; 3964; 3967; 3978; 4120; 4169; 4219; 4226; 4303; 4…
Ahnak	66395	569007630	XP_006527317.1	neuroblast differentiation-associated protein AHNAK isoform X2 [Mus musculus]	790	1	[K].ISMPDIDLNLKGPK.[V]	ISMPDIDLNLkGPK	[K11](Biotin)	589.647	3	2508	1	PDIDLNLkGPKVKGD	569007630	1	1	0	0	2	1	0	0	591575	38164.8	0	0	1053; 1319	4	2	129; 184; 204; 245; 393; 503; 543; 562; 569; 633; 697; 713; 827; 890; 944; 996; 1011; 1053; 1065; 1183; 1190; 1193; 1252; 1267; 1309; 1316; 1319; 1328; 1384; 1391; 1445; 1507; 1519; 1582; 1628; 1697; 1761; 1775; 1823; 1885; 1889; 1892; 1903; 1966; 2228; 2239; 2302; 2369; 2380; 2497; 2508; 2522; 2556; 2818; 2825; 3024; 3065; 3075; 3086; 3277; 3898; 3964; 3967; 3978; 4120; 4169; 4219; 4226; 4303; 4…
Ahnak	66395	569007630	XP_006527317.1	neuroblast differentiation-associated protein AHNAK isoform X2 [Mus musculus]	790	1	[K].LSGPNLKMPSLEVSVPK.[I]	LSGPNLkMPSLEVSVPK	[K7](Biotin)	674.697	3	4616	1	KLSGPNLkMPSLEVS	569007630	1	0	0	0	1	0	0	0	203652	0	0	0	1053; 1319	4	2	129; 184; 204; 245; 393; 503; 543; 562; 569; 633; 697; 713; 827; 890; 944; 996; 1011; 1053; 1065; 1183; 1190; 1193; 1252; 1267; 1309; 1316; 1319; 1328; 1384; 1391; 1445; 1507; 1519; 1582; 1628; 1697; 1761; 1775; 1823; 1885; 1889; 1892; 1903; 1966; 2228; 2239; 2302; 2369; 2380; 2497; 2508; 2522; 2556; 2818; 2825; 3024; 3065; 3075; 3086; 3277; 3898; 3964; 3967; 3978; 4120; 4169; 4219; 4226; 4303; 4…
Ahnak	66395	569007630	XP_006527317.1	neuroblast differentiation-associated protein AHNAK isoform X2 [Mus musculus]	790	1	[K].APKVSLPDVDLDLKGPK.[M]	APkVSLPDVDLDLKGPK	[K3](Biotin)	673.372	3	1065	2	EMHFKAPkVSLPDVD	569007630	1	1	0	0	1	1	0	0	337100	60470	0	0	1053; 1319	4	2	129; 184; 204; 245; 393; 503; 543; 562; 569; 633; 697; 713; 827; 890; 944; 996; 1011; 1053; 1065; 1183; 1190; 1193; 1252; 1267; 1309; 1316; 1319; 1328; 1384; 1391; 1445; 1507; 1519; 1582; 1628; 1697; 1761; 1775; 1823; 1885; 1889; 1892; 1903; 1966; 2228; 2239; 2302; 2369; 2380; 2497; 2508; 2522; 2556; 2818; 2825; 3024; 3065; 3075; 3086; 3277; 3898; 3964; 3967; 3978; 4120; 4169; 4219; 4226; 4303; 4…
Ahnak	66395	569007630	XP_006527317.1	neuroblast differentiation-associated protein AHNAK isoform X2 [Mus musculus]	790	1	[K].ISMPDVDLNFKGPK.[L]	ISMPDVDLNFkGPK	[K11](Biotin)	596.301	3	1903	1	PDVDLNFkGPKLKGE	569007630	1	0	0	0	1	0	0	0	87193.3	0	0	0	1053; 1319	4	2	129; 184; 204; 245; 393; 503; 543; 562; 569; 633; 697; 713; 827; 890; 944; 996; 1011; 1053; 1065; 1183; 1190; 1193; 1252; 1267; 1309; 1316; 1319; 1328; 1384; 1391; 1445; 1507; 1519; 1582; 1628; 1697; 1761; 1775; 1823; 1885; 1889; 1892; 1903; 1966; 2228; 2239; 2302; 2369; 2380; 2497; 2508; 2522; 2556; 2818; 2825; 3024; 3065; 3075; 3086; 3277; 3898; 3964; 3967; 3978; 4120; 4169; 4219; 4226; 4303; 4…
Ahnak	66395	569007630	XP_006527317.1	neuroblast differentiation-associated protein AHNAK isoform X2 [Mus musculus]	790	1	[K].LKGPKFKVPDVQFK.[T]	LKGPKFKVPDVQFK	[K](Biotin)			X	3
Ahnak	66395	569007630	XP_006527317.1	neuroblast differentiation-associated protein AHNAK isoform X2 [Mus musculus]	790	1	[K].LKGPQITGPSLEGDLGLKGTK.[L]	LKGPQITGPSLEGDLGLkGTK	[K18](Biotin)	779.096	3	393	2	LEGDLGLkGTKLQGN	569007630	1	1	0	0	1	1	0	0	524782	63611.5	0	0	1053; 1319	4	2	129; 184; 204; 245; 393; 503; 543; 562; 569; 633; 697; 713; 827; 890; 944; 996; 1011; 1053; 1065; 1183; 1190; 1193; 1252; 1267; 1309; 1316; 1319; 1328; 1384; 1391; 1445; 1507; 1519; 1582; 1628; 1697; 1761; 1775; 1823; 1885; 1889; 1892; 1903; 1966; 2228; 2239; 2302; 2369; 2380; 2497; 2508; 2522; 2556; 2818; 2825; 3024; 3065; 3075; 3086; 3277; 3898; 3964; 3967; 3978; 4120; 4169; 4219; 4226; 4303; 4…
Ahnak	66395	569007630	XP_006527317.1	neuroblast differentiation-associated protein AHNAK isoform X2 [Mus musculus]	790	1	[K].ISMPDVSLNLKGPK.[V]	ISMPDVSLNLkGPK	[K11](Biotin)	575.641	3	1582	1	PDVSLNLkGPKVKAD	569007630	1	0	0	0	1	0	0	0	100028	0	0	0	1053; 1319	4	2	129; 184; 204; 245; 393; 503; 543; 562; 569; 633; 697; 713; 827; 890; 944; 996; 1011; 1053; 1065; 1183; 1190; 1193; 1252; 1267; 1309; 1316; 1319; 1328; 1384; 1391; 1445; 1507; 1519; 1582; 1628; 1697; 1761; 1775; 1823; 1885; 1889; 1892; 1903; 1966; 2228; 2239; 2302; 2369; 2380; 2497; 2508; 2522; 2556; 2818; 2825; 3024; 3065; 3075; 3086; 3277; 3898; 3964; 3967; 3978; 4120; 4169; 4219; 4226; 4303; 4…
Ahnak	66395	569007630	XP_006527317.1	neuroblast differentiation-associated protein AHNAK isoform X2 [Mus musculus]	790	1	[K].FNFSGSKVQTPEVDVK.[L]	FNFSGSkVQTPEVDVK	[K7](Biotin)	670.001	3	3024	1	KFNFSGSkVQTPEVD	569007630	1	1	0	0	1	1	0	0	395246	95700.8	0	0	1053; 1319	4	2	129; 184; 204; 245; 393; 503; 543; 562; 569; 633; 697; 713; 827; 890; 944; 996; 1011; 1053; 1065; 1183; 1190; 1193; 1252; 1267; 1309; 1316; 1319; 1328; 1384; 1391; 1445; 1507; 1519; 1582; 1628; 1697; 1761; 1775; 1823; 1885; 1889; 1892; 1903; 1966; 2228; 2239; 2302; 2369; 2380; 2497; 2508; 2522; 2556; 2818; 2825; 3024; 3065; 3075; 3086; 3277; 3898; 3964; 3967; 3978; 4120; 4169; 4219; 4226; 4303; 4…
Ahnak	66395	569007630	XP_006527317.1	neuroblast differentiation-associated protein AHNAK isoform X2 [Mus musculus]	790	1	[K].AAKISMPDVDLNFKGPK.[L]	AAkISMPDVDLNFKGPK	[K3](Biotin)	686.357	3	1892	2	KLNIKAAkISMPDVD	569007630	1	1	0	0	1	1	0	0	733421	59855.1	0	0	1053; 1319	4	2	129; 184; 204; 245; 393; 503; 543; 562; 569; 633; 697; 713; 827; 890; 944; 996; 1011; 1053; 1065; 1183; 1190; 1193; 1252; 1267; 1309; 1316; 1319; 1328; 1384; 1391; 1445; 1507; 1519; 1582; 1628; 1697; 1761; 1775; 1823; 1885; 1889; 1892; 1903; 1966; 2228; 2239; 2302; 2369; 2380; 2497; 2508; 2522; 2556; 2818; 2825; 3024; 3065; 3075; 3086; 3277; 3898; 3964; 3967; 3978; 4120; 4169; 4219; 4226; 4303; 4…
Ahnak	66395	569007630	XP_006527317.1	neuroblast differentiation-associated protein AHNAK isoform X2 [Mus musculus]	790	1	[K].ITGPDANVHLKTPK.[V]	ITGPDANVHLkTPK	[K11](Biotin)	572.975	3	4637	1	PDANVHLkTPKVGIS	569007630	1	1	0	0	1	1	0	0	456634	40361.8	0	0	1053; 1319	4	2	129; 184; 204; 245; 393; 503; 543; 562; 569; 633; 697; 713; 827; 890; 944; 996; 1011; 1053; 1065; 1183; 1190; 1193; 1252; 1267; 1309; 1316; 1319; 1328; 1384; 1391; 1445; 1507; 1519; 1582; 1628; 1697; 1761; 1775; 1823; 1885; 1889; 1892; 1903; 1966; 2228; 2239; 2302; 2369; 2380; 2497; 2508; 2522; 2556; 2818; 2825; 3024; 3065; 3075; 3086; 3277; 3898; 3964; 3967; 3978; 4120; 4169; 4219; 4226; 4303; 4…
Ahnak	66395	569007630	XP_006527317.1	neuroblast differentiation-associated protein AHNAK isoform X2 [Mus musculus]	790	1	[K].ISSPSGKIGACR.[I]	ISSPSGkIGACR	[K7](Biotin)	486.91	3	569	1	KISSPSGkIGACRIS	569007630	0	1	0	0	0	1	0	0	0	20322.4	0	0	1053; 1319	4	2	129; 184; 204; 245; 393; 503; 543; 562; 569; 633; 697; 713; 827; 890; 944; 996; 1011; 1053; 1065; 1183; 1190; 1193; 1252; 1267; 1309; 1316; 1319; 1328; 1384; 1391; 1445; 1507; 1519; 1582; 1628; 1697; 1761; 1775; 1823; 1885; 1889; 1892; 1903; 1966; 2228; 2239; 2302; 2369; 2380; 2497; 2508; 2522; 2556; 2818; 2825; 3024; 3065; 3075; 3086; 3277; 3898; 3964; 3967; 3978; 4120; 4169; 4219; 4226; 4303; 4…
Ahnak	66395	569007630	XP_006527317.1	neuroblast differentiation-associated protein AHNAK isoform X2 [Mus musculus]	790	1	[K].FSMPGFKAEGPEVSLPK.[A]	FSMPGFkAEGPEVSLPK	[K7](Biotin)	683.006	3	1267	1	KFSMPGFkAEGPEVS	569007630	1	0	0	0	1	0	0	0	126487	0	0	0	1053; 1319	4	2	129; 184; 204; 245; 393; 503; 543; 562; 569; 633; 697; 713; 827; 890; 944; 996; 1011; 1053; 1065; 1183; 1190; 1193; 1252; 1267; 1309; 1316; 1319; 1328; 1384; 1391; 1445; 1507; 1519; 1582; 1628; 1697; 1761; 1775; 1823; 1885; 1889; 1892; 1903; 1966; 2228; 2239; 2302; 2369; 2380; 2497; 2508; 2522; 2556; 2818; 2825; 3024; 3065; 3075; 3086; 3277; 3898; 3964; 3967; 3978; 4120; 4169; 4219; 4226; 4303; 4…
Ahnak	66395	569007630	XP_006527317.1	neuroblast differentiation-associated protein AHNAK isoform X2 [Mus musculus]	790	1	[K].FSMPGFKGEGPEVDIPK.[A]	FSMPGFkGEGPEVDIPK	[K7](Biotin)	687.667	3	1519	1	KFSMPGFkGEGPEVD	569007630	1	0	0	0	1	0	0	0	100666	0	0	0	1053; 1319	4	2	129; 184; 204; 245; 393; 503; 543; 562; 569; 633; 697; 713; 827; 890; 944; 996; 1011; 1053; 1065; 1183; 1190; 1193; 1252; 1267; 1309; 1316; 1319; 1328; 1384; 1391; 1445; 1507; 1519; 1582; 1628; 1697; 1761; 1775; 1823; 1885; 1889; 1892; 1903; 1966; 2228; 2239; 2302; 2369; 2380; 2497; 2508; 2522; 2556; 2818; 2825; 3024; 3065; 3075; 3086; 3277; 3898; 3964; 3967; 3978; 4120; 4169; 4219; 4226; 4303; 4…
Ahnak	66395	569007630	XP_006527317.1	neuroblast differentiation-associated protein AHNAK isoform X2 [Mus musculus]	790	1	[K].KTMFGKMYFPDVEFDIK.[S]	KTMFGkMYFPDVEFDIK	[K6](Biotin)	774.706	3	4800	2	VKKTMFGkMYFPDVE	569007630	1	0	0	0	1	0	0	0	191217	0	0	0	1053; 1319	4	2	129; 184; 204; 245; 393; 503; 543; 562; 569; 633; 697; 713; 827; 890; 944; 996; 1011; 1053; 1065; 1183; 1190; 1193; 1252; 1267; 1309; 1316; 1319; 1328; 1384; 1391; 1445; 1507; 1519; 1582; 1628; 1697; 1761; 1775; 1823; 1885; 1889; 1892; 1903; 1966; 2228; 2239; 2302; 2369; 2380; 2497; 2508; 2522; 2556; 2818; 2825; 3024; 3065; 3075; 3086; 3277; 3898; 3964; 3967; 3978; 4120; 4169; 4219; 4226; 4303; 4…
Ahnak	66395	569007630	XP_006527317.1	neuroblast differentiation-associated protein AHNAK isoform X2 [Mus musculus]	790	1	[QHR].GPDWHLKMPK.[MVI]	GPDWHLkMPK	[K7](Biotin)	478.906	3	1252	1	QGPDWHLkMPKMKMP	569007630	1	0	0	0	1	0	0	0	283494	0	0	0	1053; 1319	4	2	129; 184; 204; 245; 393; 503; 543; 562; 569; 633; 697; 713; 827; 890; 944; 996; 1011; 1053; 1065; 1183; 1190; 1193; 1252; 1267; 1309; 1316; 1319; 1328; 1384; 1391; 1445; 1507; 1519; 1582; 1628; 1697; 1761; 1775; 1823; 1885; 1889; 1892; 1903; 1966; 2228; 2239; 2302; 2369; 2380; 2497; 2508; 2522; 2556; 2818; 2825; 3024; 3065; 3075; 3086; 3277; 3898; 3964; 3967; 3978; 4120; 4169; 4219; 4226; 4303; 4…
Ahnak	66395	569007630	XP_006527317.1	neuroblast differentiation-associated protein AHNAK isoform X2 [Mus musculus]	790	1	[K].FKMPDMHFK.[AT]	FkMPDMHFK	[K2](Biotin)	469.553	3	1183	1	KLKGPKFkMPDMHFK	569007630	1	1	0	0	1	1	0	0	671790	33402.2	0	0	1053; 1319	4	2	129; 184; 204; 245; 393; 503; 543; 562; 569; 633; 697; 713; 827; 890; 944; 996; 1011; 1053; 1065; 1183; 1190; 1193; 1252; 1267; 1309; 1316; 1319; 1328; 1384; 1391; 1445; 1507; 1519; 1582; 1628; 1697; 1761; 1775; 1823; 1885; 1889; 1892; 1903; 1966; 2228; 2239; 2302; 2369; 2380; 2497; 2508; 2522; 2556; 2818; 2825; 3024; 3065; 3075; 3086; 3277; 3898; 3964; 3967; 3978; 4120; 4169; 4219; 4226; 4303; 4…
Ahnak	66395	569007630	XP_006527317.1	neuroblast differentiation-associated protein AHNAK isoform X2 [Mus musculus]	790	1	[K].FKMPDMHFKAPK.[I]	FKMPDMHFkAPK	[K9](Biotin)	426.462	4	1190	2	KMPDMHFkAPKISMP	569007630	1	0	0	0	3	0	0	0	1.1828e+06	0	0	0	1053; 1319	4	2	129; 184; 204; 245; 393; 503; 543; 562; 569; 633; 697; 713; 827; 890; 944; 996; 1011; 1053; 1065; 1183; 1190; 1193; 1252; 1267; 1309; 1316; 1319; 1328; 1384; 1391; 1445; 1507; 1519; 1582; 1628; 1697; 1761; 1775; 1823; 1885; 1889; 1892; 1903; 1966; 2228; 2239; 2302; 2369; 2380; 2497; 2508; 2522; 2556; 2818; 2825; 3024; 3065; 3075; 3086; 3277; 3898; 3964; 3967; 3978; 4120; 4169; 4219; 4226; 4303; 4…
Ahnak	66395	569007630	XP_006527317.1	neuroblast differentiation-associated protein AHNAK isoform X2 [Mus musculus]	790	1	[K].FKMPDLHLKAPK.[I]	FKMPDLHLkAPK	[K9](Biotin)	413.477	4	3964	2	KMPDLHLkAPKISMP	569007630	1	0	0	0	1	0	0	0	287231	0	0	0	1053; 1319	4	2	129; 184; 204; 245; 393; 503; 543; 562; 569; 633; 697; 713; 827; 890; 944; 996; 1011; 1053; 1065; 1183; 1190; 1193; 1252; 1267; 1309; 1316; 1319; 1328; 1384; 1391; 1445; 1507; 1519; 1582; 1628; 1697; 1761; 1775; 1823; 1885; 1889; 1892; 1903; 1966; 2228; 2239; 2302; 2369; 2380; 2497; 2508; 2522; 2556; 2818; 2825; 3024; 3065; 3075; 3086; 3277; 3898; 3964; 3967; 3978; 4120; 4169; 4219; 4226; 4303; 4…
Ahnak	66395	569007630	XP_006527317.1	neuroblast differentiation-associated protein AHNAK isoform X2 [Mus musculus]	790	1	[K].VSMPDVELNLKGPK.[V]	VSMPDVELNLkGPK	[K11](Biotin)	584.973	3	3086	1	PDVELNLkGPKVKGD	569007630	1	0	0	0	1	0	0	0	108131	0	0	0	1053; 1319	4	2	129; 184; 204; 245; 393; 503; 543; 562; 569; 633; 697; 713; 827; 890; 944; 996; 1011; 1053; 1065; 1183; 1190; 1193; 1252; 1267; 1309; 1316; 1319; 1328; 1384; 1391; 1445; 1507; 1519; 1582; 1628; 1697; 1761; 1775; 1823; 1885; 1889; 1892; 1903; 1966; 2228; 2239; 2302; 2369; 2380; 2497; 2508; 2522; 2556; 2818; 2825; 3024; 3065; 3075; 3086; 3277; 3898; 3964; 3967; 3978; 4120; 4169; 4219; 4226; 4303; 4…
Ahnak	66395	569007630	XP_006527317.1	neuroblast differentiation-associated protein AHNAK isoform X2 [Mus musculus]	790	1	[K].FKMPFLSISSPKVSMPDVELNLKGPK.[V]	FKMPFLSISSPkVSMPDVELNLKGPK	[K12](Biotin)	779.667	4	3075	3	FLSISSPkVSMPDVE	569007630	1	0	0	0	1	0	0	0	79123.1	0	0	0	1053; 1319	4	2	129; 184; 204; 245; 393; 503; 543; 562; 569; 633; 697; 713; 827; 890; 944; 996; 1011; 1053; 1065; 1183; 1190; 1193; 1252; 1267; 1309; 1316; 1319; 1328; 1384; 1391; 1445; 1507; 1519; 1582; 1628; 1697; 1761; 1775; 1823; 1885; 1889; 1892; 1903; 1966; 2228; 2239; 2302; 2369; 2380; 2497; 2508; 2522; 2556; 2818; 2825; 3024; 3065; 3075; 3086; 3277; 3898; 3964; 3967; 3978; 4120; 4169; 4219; 4226; 4303; 4…
Ahnak	66395	569007630	XP_006527317.1	neuroblast differentiation-associated protein AHNAK isoform X2 [Mus musculus]	790	1	[K].FKMPKLNIK.[A]	FKMPkLNIK	[K5](Biotin)	448.923	3	1885	2	GSKFKMPkLNIKAAK	569007630	1	0	0	0	1	0	0	0	183718	0	0	0	1053; 1319	4	2	129; 184; 204; 245; 393; 503; 543; 562; 569; 633; 697; 713; 827; 890; 944; 996; 1011; 1053; 1065; 1183; 1190; 1193; 1252; 1267; 1309; 1316; 1319; 1328; 1384; 1391; 1445; 1507; 1519; 1582; 1628; 1697; 1761; 1775; 1823; 1885; 1889; 1892; 1903; 1966; 2228; 2239; 2302; 2369; 2380; 2497; 2508; 2522; 2556; 2818; 2825; 3024; 3065; 3075; 3086; 3277; 3898; 3964; 3967; 3978; 4120; 4169; 4219; 4226; 4303; 4…
Ahnak	66395	569007630	XP_006527317.1	neuroblast differentiation-associated protein AHNAK isoform X2 [Mus musculus]	790	1	[K].FSMPSLKGEGPELDVNMPK.[A]	FSMPSLkGEGPELDVNMPK	[K7](Biotin)	768.034	3	1011	1	KFSMPSLkGEGPELD	569007630	1	0	0	0	1	0	0	0	123112	0	0	0	1053; 1319	4	2	129; 184; 204; 245; 393; 503; 543; 562; 569; 633; 697; 713; 827; 890; 944; 996; 1011; 1053; 1065; 1183; 1190; 1193; 1252; 1267; 1309; 1316; 1319; 1328; 1384; 1391; 1445; 1507; 1519; 1582; 1628; 1697; 1761; 1775; 1823; 1885; 1889; 1892; 1903; 1966; 2228; 2239; 2302; 2369; 2380; 2497; 2508; 2522; 2556; 2818; 2825; 3024; 3065; 3075; 3086; 3277; 3898; 3964; 3967; 3978; 4120; 4169; 4219; 4226; 4303; 4…
Ahnak	66395	569007630	XP_006527317.1	neuroblast differentiation-associated protein AHNAK isoform X2 [Mus musculus]	790	1	[K].APKISMPDIDLNLKGPK.[V]	APkISMPDIDLNLKGPK	[K3](Biotin)	693.704	3	2497	2	EMNIKAPkISMPDID	569007630	1	1	0	0	2	2	0	0	7.20345e+06	796845	0	0	1053; 1319	4	2	129; 184; 204; 245; 393; 503; 543; 562; 569; 633; 697; 713; 827; 890; 944; 996; 1011; 1053; 1065; 1183; 1190; 1193; 1252; 1267; 1309; 1316; 1319; 1328; 1384; 1391; 1445; 1507; 1519; 1582; 1628; 1697; 1761; 1775; 1823; 1885; 1889; 1892; 1903; 1966; 2228; 2239; 2302; 2369; 2380; 2497; 2508; 2522; 2556; 2818; 2825; 3024; 3065; 3075; 3086; 3277; 3898; 3964; 3967; 3978; 4120; 4169; 4219; 4226; 4303; 4…
Ahnak	66395	569007630	XP_006527317.1	neuroblast differentiation-associated protein AHNAK isoform X2 [Mus musculus]	790	1	[K].FKMPSMNIQTHKISMPDVGLNLKGPK.[L]	FKMPSMNIQTHkISMPDVGLNLKGPK	[K12](Biotin)	628.329	5	1697	3	SMNIQTHkISMPDVG	569007630	1	0	0	0	1	0	0	0	184777	0	0	0	1053; 1319	4	2	129; 184; 204; 245; 393; 503; 543; 562; 569; 633; 697; 713; 827; 890; 944; 996; 1011; 1053; 1065; 1183; 1190; 1193; 1252; 1267; 1309; 1316; 1319; 1328; 1384; 1391; 1445; 1507; 1519; 1582; 1628; 1697; 1761; 1775; 1823; 1885; 1889; 1892; 1903; 1966; 2228; 2239; 2302; 2369; 2380; 2497; 2508; 2522; 2556; 2818; 2825; 3024; 3065; 3075; 3086; 3277; 3898; 3964; 3967; 3978; 4120; 4169; 4219; 4226; 4303; 4…
Ahnak	66395	569007630	XP_006527317.1	neuroblast differentiation-associated protein AHNAK isoform X2 [Mus musculus]	790	1	[K].APKISMPDLHLK.[G]	APkISMPDLHLK	[K3](Biotin)	525.951	3	1319	1	EMNIKAPkISMPDLH	569007630	0	1	0	0	0	1	0	0	0	48754.5	0	0	1053; 1319	4	2	129; 184; 204; 245; 393; 503; 543; 562; 569; 633; 697; 713; 827; 890; 944; 996; 1011; 1053; 1065; 1183; 1190; 1193; 1252; 1267; 1309; 1316; 1319; 1328; 1384; 1391; 1445; 1507; 1519; 1582; 1628; 1697; 1761; 1775; 1823; 1885; 1889; 1892; 1903; 1966; 2228; 2239; 2302; 2369; 2380; 2497; 2508; 2522; 2556; 2818; 2825; 3024; 3065; 3075; 3086; 3277; 3898; 3964; 3967; 3978; 4120; 4169; 4219; 4226; 4303; 4…
Ahnak	66395	569007630	XP_006527317.1	neuroblast differentiation-associated protein AHNAK isoform X2 [Mus musculus]	790	1	[K].APKISMPDFDLHLK.[G]	APkISMPDFDLHLK	[K3](Biotin)	613.317	3	2369	1	EMNIKAPkISMPDFD	569007630	1	0	0	0	1	0	0	0	116215	0	0	0	1053; 1319	4	2	129; 184; 204; 245; 393; 503; 543; 562; 569; 633; 697; 713; 827; 890; 944; 996; 1011; 1053; 1065; 1183; 1190; 1193; 1252; 1267; 1309; 1316; 1319; 1328; 1384; 1391; 1445; 1507; 1519; 1582; 1628; 1697; 1761; 1775; 1823; 1885; 1889; 1892; 1903; 1966; 2228; 2239; 2302; 2369; 2380; 2497; 2508; 2522; 2556; 2818; 2825; 3024; 3065; 3075; 3086; 3277; 3898; 3964; 3967; 3978; 4120; 4169; 4219; 4226; 4303; 4…
Ahnak	66395	569007630	XP_006527317.1	neuroblast differentiation-associated protein AHNAK isoform X2 [Mus musculus]	790	1	[K].FKMPEMNIKAPK.[I]	FKMPEMNIkAPK	[K9](Biotin)	553.952	3	1316	2	KMPEMNIkAPKISMP	569007630	1	1	0	0	1	1	0	0	608176	74442.3	0	0	1053; 1319	4	2	129; 184; 204; 245; 393; 503; 543; 562; 569; 633; 697; 713; 827; 890; 944; 996; 1011; 1053; 1065; 1183; 1190; 1193; 1252; 1267; 1309; 1316; 1319; 1328; 1384; 1391; 1445; 1507; 1519; 1582; 1628; 1697; 1761; 1775; 1823; 1885; 1889; 1892; 1903; 1966; 2228; 2239; 2302; 2369; 2380; 2497; 2508; 2522; 2556; 2818; 2825; 3024; 3065; 3075; 3086; 3277; 3898; 3964; 3967; 3978; 4120; 4169; 4219; 4226; 4303; 4…
Ahnak	66395	569007630	XP_006527317.1	neuroblast differentiation-associated protein AHNAK isoform X2 [Mus musculus]	790	1	[K].VKMPKFSMPGFKGEGPEVDVSLPK.[A]	VKMPKFSMPGFKGEGPEVDVSLPK	[K](Biotin)			X	3
Ahnak	66395	569007630	XP_006527317.1	neuroblast differentiation-associated protein AHNAK isoform X2 [Mus musculus]	790	1	[K].VKGDVDVSLPKVEGEIKVPEVDIK.[GD]	VKGDVDVSLPkVEGEIKVPEVDIK	[K11](Biotin)	705.388	4	2522	3	DVDVSLPkVEGEIKV	569007630	1	0	0	0	1	0	0	0	0	0	0	0	1053; 1319	4	2	129; 184; 204; 245; 393; 503; 543; 562; 569; 633; 697; 713; 827; 890; 944; 996; 1011; 1053; 1065; 1183; 1190; 1193; 1252; 1267; 1309; 1316; 1319; 1328; 1384; 1391; 1445; 1507; 1519; 1582; 1628; 1697; 1761; 1775; 1823; 1885; 1889; 1892; 1903; 1966; 2228; 2239; 2302; 2369; 2380; 2497; 2508; 2522; 2556; 2818; 2825; 3024; 3065; 3075; 3086; 3277; 3898; 3964; 3967; 3978; 4120; 4169; 4219; 4226; 4303; 4…
Ahnak	66395	569007630	XP_006527317.1	neuroblast differentiation-associated protein AHNAK isoform X2 [Mus musculus]	790	1	[K].FKMPDMHFKTPK.[I]	FKMPDMHFkTPK	[K9](Biotin)	433.965	4	1761	2	KMPDMHFkTPKISMP	569007630	1	1	0	0	1	1	0	0	168543	22495.5	0	0	1053; 1319	4	2	129; 184; 204; 245; 393; 503; 543; 562; 569; 633; 697; 713; 827; 890; 944; 996; 1011; 1053; 1065; 1183; 1190; 1193; 1252; 1267; 1309; 1316; 1319; 1328; 1384; 1391; 1445; 1507; 1519; 1582; 1628; 1697; 1761; 1775; 1823; 1885; 1889; 1892; 1903; 1966; 2228; 2239; 2302; 2369; 2380; 2497; 2508; 2522; 2556; 2818; 2825; 3024; 3065; 3075; 3086; 3277; 3898; 3964; 3967; 3978; 4120; 4169; 4219; 4226; 4303; 4…
Ahnak	66395	569007630	XP_006527317.1	neuroblast differentiation-associated protein AHNAK isoform X2 [Mus musculus]	790	1	[K].FKMPEMNIKPQKISMPDVSLNLKGPK.[V]	FKMPEMNIKPQKISMPDVSLNLKGPK	[K](Biotin)			X	3
Ahnak	66395	569007630	XP_006527317.1	neuroblast differentiation-associated protein AHNAK isoform X2 [Mus musculus]	790	1	[K].FKVPDVQFK.[T]	FkVPDVQFK	[K2](Biotin)	667.351	2	4219	1	KLKGPKFkVPDVQFK	569007630	1	0	0	0	1	0	0	0	66775.4	0	0	0	1053; 1319	4	2	129; 184; 204; 245; 393; 503; 543; 562; 569; 633; 697; 713; 827; 890; 944; 996; 1011; 1053; 1065; 1183; 1190; 1193; 1252; 1267; 1309; 1316; 1319; 1328; 1384; 1391; 1445; 1507; 1519; 1582; 1628; 1697; 1761; 1775; 1823; 1885; 1889; 1892; 1903; 1966; 2228; 2239; 2302; 2369; 2380; 2497; 2508; 2522; 2556; 2818; 2825; 3024; 3065; 3075; 3086; 3277; 3898; 3964; 3967; 3978; 4120; 4169; 4219; 4226; 4303; 4…
Ahnak	66395	569007630	XP_006527317.1	neuroblast differentiation-associated protein AHNAK isoform X2 [Mus musculus]	790	1	[K].ISMPDVDLHLKGPNVKGEYDVTVPR.[A]	ISMPDVDLHLkGPNVKGEYDVTVPR	[K11](Biotin)	752.137	4	827	2	PDVDLHLkGPNVKGE	569007630	1	0	0	0	1	0	0	0	58142.6	0	0	0	1053; 1319	4	2	129; 184; 204; 245; 393; 503; 543; 562; 569; 633; 697; 713; 827; 890; 944; 996; 1011; 1053; 1065; 1183; 1190; 1193; 1252; 1267; 1309; 1316; 1319; 1328; 1384; 1391; 1445; 1507; 1519; 1582; 1628; 1697; 1761; 1775; 1823; 1885; 1889; 1892; 1903; 1966; 2228; 2239; 2302; 2369; 2380; 2497; 2508; 2522; 2556; 2818; 2825; 3024; 3065; 3075; 3086; 3277; 3898; 3964; 3967; 3978; 4120; 4169; 4219; 4226; 4303; 4…
Ahnak	66395	569007630	XP_006527317.1	neuroblast differentiation-associated protein AHNAK isoform X2 [Mus musculus]	790	1	[K].ISMPEVDLNLKGPK.[V]	ISMPEVDLNLkGPK	[K11](Biotin)	589.643	3	4314	1	PEVDLNLkGPKVKGD	569007630	0	1	0	0	0	1	0	0	0	38164.8	0	0	1053; 1319	4	2	129; 184; 204; 245; 393; 503; 543; 562; 569; 633; 697; 713; 827; 890; 944; 996; 1011; 1053; 1065; 1183; 1190; 1193; 1252; 1267; 1309; 1316; 1319; 1328; 1384; 1391; 1445; 1507; 1519; 1582; 1628; 1697; 1761; 1775; 1823; 1885; 1889; 1892; 1903; 1966; 2228; 2239; 2302; 2369; 2380; 2497; 2508; 2522; 2556; 2818; 2825; 3024; 3065; 3075; 3086; 3277; 3898; 3964; 3967; 3978; 4120; 4169; 4219; 4226; 4303; 4…
Ahnak	66395	569007630	XP_006527317.1	neuroblast differentiation-associated protein AHNAK isoform X2 [Mus musculus]	790	1	[K].APKISMPDVDLHMKGPK.[V]	APkISMPDVDLHMKGPK	[K3](Biotin)	523.27	4	944	2	EMNIKAPkISMPDVD	569007630	0	1	0	0	0	1	0	0	0	0	0	0	1053; 1319	4	2	129; 184; 204; 245; 393; 503; 543; 562; 569; 633; 697; 713; 827; 890; 944; 996; 1011; 1053; 1065; 1183; 1190; 1193; 1252; 1267; 1309; 1316; 1319; 1328; 1384; 1391; 1445; 1507; 1519; 1582; 1628; 1697; 1761; 1775; 1823; 1885; 1889; 1892; 1903; 1966; 2228; 2239; 2302; 2369; 2380; 2497; 2508; 2522; 2556; 2818; 2825; 3024; 3065; 3075; 3086; 3277; 3898; 3964; 3967; 3978; 4120; 4169; 4219; 4226; 4303; 4…
Ahnak	66395	569007630	XP_006527317.1	neuroblast differentiation-associated protein AHNAK isoform X2 [Mus musculus]	790	1	[K].GSRVDIETPNLEGTLTGPKISSPSGK.[I]	GSRVDIETPNLEGTLTGPkISSPSGK	[K19](Biotin)	717.372	4	562	2	EGTLTGPkISSPSGK	569007630	1	0	0	0	1	0	0	0	0	0	0	0	1053; 1319	4	2	129; 184; 204; 245; 393; 503; 543; 562; 569; 633; 697; 713; 827; 890; 944; 996; 1011; 1053; 1065; 1183; 1190; 1193; 1252; 1267; 1309; 1316; 1319; 1328; 1384; 1391; 1445; 1507; 1519; 1582; 1628; 1697; 1761; 1775; 1823; 1885; 1889; 1892; 1903; 1966; 2228; 2239; 2302; 2369; 2380; 2497; 2508; 2522; 2556; 2818; 2825; 3024; 3065; 3075; 3086; 3277; 3898; 3964; 3967; 3978; 4120; 4169; 4219; 4226; 4303; 4…
Ahnak	66395	569007630	XP_006527317.1	neuroblast differentiation-associated protein AHNAK isoform X2 [Mus musculus]	790	1	[K].VDISAPDVDVQGPDWHLKMPK.[M]	VDISAPDVDVQGPDWHLkMPK	[K18](Biotin)	858.425	3	1252	1	QGPDWHLkMPKMKMP	569007630	1	0	0	0	1	0	0	0	77587.8	0	0	0	1053; 1319	4	2	129; 184; 204; 245; 393; 503; 543; 562; 569; 633; 697; 713; 827; 890; 944; 996; 1011; 1053; 1065; 1183; 1190; 1193; 1252; 1267; 1309; 1316; 1319; 1328; 1384; 1391; 1445; 1507; 1519; 1582; 1628; 1697; 1761; 1775; 1823; 1885; 1889; 1892; 1903; 1966; 2228; 2239; 2302; 2369; 2380; 2497; 2508; 2522; 2556; 2818; 2825; 3024; 3065; 3075; 3086; 3277; 3898; 3964; 3967; 3978; 4120; 4169; 4219; 4226; 4303; 4…
Ahnak	66395	569007630	XP_006527317.1	neuroblast differentiation-associated protein AHNAK isoform X2 [Mus musculus]	790	1	[K].TMFGKMYFPDVEFDIK.[S]	TMFGkMYFPDVEFDIK	[K5](Biotin)	732.008	3	4800	1	VKKTMFGkMYFPDVE	569007630	1	0	0	0	1	0	0	0	0	0	0	0	1053; 1319	4	2	129; 184; 204; 245; 393; 503; 543; 562; 569; 633; 697; 713; 827; 890; 944; 996; 1011; 1053; 1065; 1183; 1190; 1193; 1252; 1267; 1309; 1316; 1319; 1328; 1384; 1391; 1445; 1507; 1519; 1582; 1628; 1697; 1761; 1775; 1823; 1885; 1889; 1892; 1903; 1966; 2228; 2239; 2302; 2369; 2380; 2497; 2508; 2522; 2556; 2818; 2825; 3024; 3065; 3075; 3086; 3277; 3898; 3964; 3967; 3978; 4120; 4169; 4219; 4226; 4303; 4…
Cstf2t	83410	148277061	NP_112539.2	cleavage stimulation factor subunit 2 tau variant [Mus musculus]	16	1	[R].KIHVTPLIPGK.[S]	kIHVTPLIPGK	[K1](Biotin)	476.951	3	194	1	ALKILHRkIHVTPLI	148277061	1	0	0	0	1	0	0	0	385220	0	0	0				145; 194; 622
Cstf2t	83410	148277061	NP_112539.2	cleavage stimulation factor subunit 2 tau variant [Mus musculus]	16	2	[R].QSILILKEQIQK.[S]	QSILILkEQIQK	[K7](Biotin)	833.984	2	622	1	RQSILILkEQIQKST	148277061	1	0	0	0	2	0	0	0	987319	0	0	0				145; 194; 622
Cstf2t	83410	148277061	NP_112539.2	cleavage stimulation factor subunit 2 tau variant [Mus musculus]	16	2	[KR].AVASLPPEQMFELMKQMK.[L]	AVASLPPEQMFELMkQMK	[K15](Biotin)	768.714	3	145	1	EQMFELMkQMKLCVQ	148277061	1	0	0	0	1	0	0	0	288462	0	0	0				145; 194; 622
Tfeb	21425	239835744	NP_035679.3	transcription factor EB isoform a [Mus musculus]	21	1	[K].VQSYLENPTSYHLQQSQHQKVR.[E]	VQSYLENPTSYHLQQSQHQkVR	[K20](Biotin)	724.862	4	149	1	LQQSQHQkVREYLSE	239835744	1	1	0	1	1	1	0	1	670900	70073.3	0	112102	149	1	1	149
Slu7	193116	27477103	NP_683514.2	pre-mRNA-splicing factor SLU7 [Mus musculus]	70	1	[K].SFKVKKEDFK.[E]	SFkVKKEDFK	[K3](Biotin)	494.6	3	358	3	ELLYKSFkVKKEDFK	27477103	1	1	0	0	1	1	0	0	667540	75175.1	0	0				358
Wiz	22404	568999838	XP_006524118.1	protein Wiz isoform X2 [Mus musculus]	66	1	[K].AKTYIQTELPFK.[A]	AkTYIQTELPFK	[K2](Biotin)	832.941	2	864	1	LPAEVKAkTYIQTEL	568999838	1	1	0	0	2	1	0	0	730268	75846.5	0	0				604; 669; 864; 940
Wiz	22404	568999838	XP_006524118.1	protein Wiz isoform X2 [Mus musculus]	66	1	[K].KLKPEHMR.[V]	KLkPEHMR	[K3](Biotin)	422.227	3	669	1	PSLPKKLkPEHMRVE	568999838	1	1	0	0	1	1	0	0	126734	22102.8	0	0				604; 669; 864; 940
Wiz	22404	568999838	XP_006524118.1	protein Wiz isoform X2 [Mus musculus]	66	1	[K].HRPQKVGAYR.[S]	HRPQkVGAYR	[K5](Biotin)	479.923	3	940	1	WIKHRPQkVGAYRSY	568999838	1	1	0	0	1	1	0	0	271191	33227.2	0	0				604; 669; 864; 940
Wiz	22404	568999838	XP_006524118.1	protein Wiz isoform X2 [Mus musculus]	66	1	[K].ALAKVLSTGGPGSSLEAR.[S]	ALAkVLSTGGPGSSLEAR	[K4](Biotin)	647.346	3	604	1	PSPKALAkVLSTGGP	568999838	1	0	0	0	1	0	0	0	364338	0	0	0				604; 669; 864; 940
Ahnak2	100041194	568899234	XP_006543088.1	protein AHNAK2 isoform X1 [Mus musculus]	149	1	[K].MPKVDLKGPHVDLKGPK.[V]	MPkVDLKGPHVDLKGPK	[K3](Biotin)	522.039	4	602	3	MPSLKMPkVDLKGPH	568899234	1	0	0	0	1	0	0	0	426896	0	0	0				592; 602; 606
Ahnak2	100041194	568899234	XP_006543088.1	protein AHNAK2 isoform X1 [Mus musculus]	149	1	[K].VDLKGPHVDLKGPK.[V]	VDLkGPHVDLKGPK	[K4](Biotin)	432.992	4	606	2	KMPKVDLkGPHVDLK	568899234	1	1	0	0	1	1	0	0	438576	0	0	0				592; 602; 606
Ahnak2	100041194	568899234	XP_006543088.1	protein AHNAK2 isoform X1 [Mus musculus]	149	1	[K].GHLPKVQMPSLK.[M]	GHLPkVQMPSLK	[K5](Biotin)	520.951	3	592	1	GLKGHLPkVQMPSLK	568899234	1	0	0	0	1	0	0	0	373976	0	0	0				592; 602; 606
Ahnak2	100041194	568899234	XP_006543088.1	protein AHNAK2 isoform X1 [Mus musculus]	149	1	[K].GHLPKVQMPSLKMPK.[V]	GHLPkVQMPSLKMPK	[K5](Biotin)	480.013	4	592	2	GLKGHLPkVQMPSLK	568899234	0	1	0	0	0	1	0	0	0	0	0	0				592; 602; 606
Sap30bp	57230	31560336	NP_065229.2	SAP30-binding protein [Mus musculus]	32	1	[K].AQKIEMDKLEK.[A]	AQkIEMDKLEK	[K3](Biotin)	520.271	3	205	2	EALAKAQkIEMDKLE	31560336	1	1	0	1	1	1	0	1	18292416	1.679e+06	0	1536518	205	1	1	205; 220
Sap30bp	57230	31560336	NP_065229.2	SAP30-binding protein [Mus musculus]	32	1	[R].TKIEFVTGTK.[K]	TkIEFVTGTK	[K2](Biotin)	675.362	2	220	1	KAKKERTkIEFVTGT	31560336	0	1	0	0	0	1	0	0	0	38539.4	0	0	205	1	1	205; 220
Sap30bp	57230	31560336	NP_065229.2	SAP30-binding protein [Mus musculus]	32	1	[R].TKIEFVTGTKK.[G]	TkIEFVTGTKK	[K2](Biotin)	493.274	3	220	2	KAKKERTkIEFVTGT	31560336	1	1	0	0	1	1	0	0	1.72575e+06	30487.3	0	0	205	1	1	205; 220
Sdpr	20324	20270267	NP_620080.1	serum deprivation-response protein [Mus musculus]	36	1	[K].LGTKIVSVERR.[E]	LGTkIVSVERR	[K4](Biotin)	495.285	3	261	2	KMNKLGTkIVSVERR	20270267	1	1	0	0	1	1	0	0	4.442e+06	313342	0	0				261
Sdpr	20324	20270267	NP_620080.1	serum deprivation-response protein [Mus musculus]	36	1	[K].LGTKIVSVER.[R]	LGTkIVSVER	[K4](Biotin)	664.376	2	261	1	KMNKLGTkIVSVERR	20270267	1	0	0	0	1	0	0	0	452617	0	0	0				261
Shroom4	208431	569008587	XP_006527610.1	protein Shroom4 isoform X1 [Mus musculus]	91	1	[R].DFLSAHKIVDHTEASEEGDNEPK.[E]	DFLSAHkIVDHTEASEEGDNEPK	[K7](Biotin)	699.322	4	555	1	RDFLSAHkIVDHTEA	569008587	1	1	0	0	1	1	0	0	1.31366e+06	140711	0	0	555	3	1	555
Shroom4	208431	569008587	XP_006527610.1	protein Shroom4 isoform X1 [Mus musculus]	91	1	[R].DFLSAHKIVDHTEASEEGDNEPKECGR.[L]	DFLSAHkIVDHTEASEEGDNEPKECGR	[K7](Biotin)	824.871	4	555	2	RDFLSAHkIVDHTEA	569008587	1	1	1	1	3	4	1	2	1.31972e+07	2579921	709469	1.40263e+06	555	3	1	555
Vezf1	22344	569017593	XP_006536517.1	vascular endothelial zinc finger 1 isoform X1 [Mus musculus]	36	1	[R].HQSCHTGIKLVSR.[A]	HQSCHTGIkLVSR	[K9](Biotin)	583.629	3	100	1	QSCHTGIkLVSRAKK	569017593	1	0	0	0	1	0	0	0	131693	0	0	0				100
Rbmx2	209003	27734072	NP_775552.1	RNA-binding motif protein, X-linked 2 [Mus musculus]	42	1	[-].MNPLTKVK.[L]	MNPLTkVK	[K6](Biotin)	599.82	2	6	1	MNPLTkVKLINEL	27734072	1	0	0	0	1	0	0	0	295553	0	0	0				6
Mecp2	17257	126517469	NP_001075448.1	methyl-CpG-binding protein 2 isoform 1 [Mus musculus]	64	1	[K].EVVKPLLVSTLGEK.[S]	EVVkPLLVSTLGEK	[K4](Biotin)	580	3	338	0	IEVKEVVkPLLVSTL	126517469	1	1	1	1	4	3	2	1	3.00954e+06	361246	207427	142066	338	3	1	338
Ccnt1	12455	6753316	NP_033963.1	cyclin-T1 [Mus musculus]	47	1	[R].IKVHSAGDKHNSIEDSVTK.[S]	IkVHSAGDKHNSIEDSVTK	[K2](Biotin)	764.385	3	484	2	EEIKMRIkVHSAGDK	6753316	1	0	1	0	2	0	1	0	1.06721e+06	0	140409	0	484	1	1	484; 556
Ccnt1	12455	6753316	NP_033963.1	cyclin-T1 [Mus musculus]	47	1	[K].HSSQTSTLAHKTYSLSSTLSSSSSTR.[K]	HSSQTSTLAHkTYSLSSTLSSSSSTR	[K11](Biotin)	742.608	4	556	1	QTSTLAHkTYSLSST	6753316	0	1	0	0	0	1	0	0	0	122483	0	0	484	1	1	484; 556
Hmg20a	66867	568961903	XP_006511431.1	high mobility group protein 20A isoform X1 [Mus musculus]	29	1	[K].TEAYKVFSR.[K]	TEAYkVFSR	[K5](Biotin)	663.829	2	176	1	YQKTEAYkVFSRKTQ	568961903	1	0	0	0	1	0	0	0	92758.3	0	0	0				176
Myo5a	17918	568960777	XP_006510890.1	unconventional myosin-Va isoform X1 [Mus musculus]	167	1	[K].NTMTDSTILLEDVQKMK.[D]	NTMTDSTILLEDVQkMK	[K15](Biotin)	731.692	3	1301	1	ILLEDVQkMKDKGEI	568960777	1	0	0	0	1	0	0	0	106509	0	0	0				1301
Maff	17133	756761817	NP_001291760.1	transcription factor MafF isoform 2 [Mus musculus]	14	1	[R].GPAALVAPASVITIVKSAPGPAPAADPAPCS.[-]	GPAALVAPASVITIVkSAPGPAPAADPAPCS	[K16](Biotin)	1027.21	3	169	1	ASVITIVkSAPGPAP	756761817	1	0	0	0	2	0	0	0	293350	0	0	0				169
Racgap1	26934	6755266	NP_036155.1	rac GTPase-activating protein 1 [Mus musculus]	48	1	[K].SATNLGQQGKFFPAPYLK.[-]	SATNLGQQGkFFPAPYLK	[K10](Biotin)	731.712	3	620	1	TNLGQQGkFFPAPYL	6755266	1	1	0	0	1	1	0	0	467856	63998.4	0	0				620
Atxn2l	233871	755522553	XP_011240077.1	ataxin-2-like protein isoform X1 [Mus musculus]	44	1	[R].IAGKVPGLQNEQKR.[F]	IAGkVPGLQNEQKR	[K4](Biotin)	588.658	3	532	2	ELARIAGkVPGLQNE	755522553	0	1	0	0	0	1	0	0	0	23431.4	0	0				532
Chd1	12648	239985588	NP_031716.2	chromodomain-helicase-DNA-binding protein 1 [Mus musculus]	155	1	[R].IIAHSNQKSAAGLPDYYCK.[W]	IIAHSNQkSAAGLPDYYCK	[K8](Biotin)	788.048	3	399	1	IIAHSNQkSAAGLPD	239985588	0	1	0	0	0	2	0	0	0	63140.2	0	0				399
Epb4.1l1	13821	568915341	XP_006498771.1	band 4.1-like protein 1 isoform X2 [Mus musculus]	99	1	[R].TLKEPNSKLIHR.[D]	TLKEPNSkLIHR	[K8](Biotin)	416.234	4	536	2	TLKEPNSkLIHRDRD	568915341	0	1	0	0	0	1	0	0	0	31183.4	0	0				536
Ibtk	108837	124486857	NP_001074751.1	inhibitor of Bruton tyrosine kinase [Mus musculus]	106	1	[K].SNLGKIISHGIK.[L]	SNLGkIISHGIK	[K5](Biotin)	498.282	3	1145	1	APKSNLGkIISHGIK	124486857	0	1	0	0	0	1	0	0	0	20792.4	0	0				1145
S100a6	20200	6755392	NP_035443.1	protein S100-A6 [Mus musculus]	10	1	[K].ELTIGSKLQDAEIAR.[L]	ELTIGSkLQDAEIAR	[K7](Biotin)	623.996	3	47	1	KELTIGSkLQDAEIA	6755392	1	0	0	0	1	0	0	0	94011.7	0	0	0				47
Fam32a	67922	13385950	NP_080731.1	protein FAM32A [Mus musculus]	24	1	[R].HLDTLTEHYDIPKVSWTK.[-]	HLDTLTEHYDIPkVSWTK	[K13](Biotin)	603.054	4	107	1	TEHYDIPkVSWTK	13385950	1	1	0	0	1	1	0	0	479510	74398.2	0	0				107
Arhgap21	71435	568912535	XP_006497601.1	rho GTPase-activating protein 21 isoform X3 [Mus musculus]	126	1	[R].TVIVPSEKVVDLLANR.[N]	TVIVPSEkVVDLLANR	[K8](Biotin)	660.373	3	287	1	TVIVPSEkVVDLLAN	568912535	1	1	1	0	2	1	1	0	739556	33395.4	53229.1	0	287	1	1	287
Taf1	270627	595582247	NP_001277658.1	transcription initiation factor TFIID subunit 1 [Mus musculus]	144	1	[K].KFVPDYYK.[V]	kFVPDYYK	[K1](Biotin)	643.318	2	1556	1	FHHPVNKkFVPDYYK	595582247	1	1	1	0	1	2	1	0	3648152	536379	201770	0	1556	1	1	1556
Gtf3c4	269252	260436918	NP_766565.2	general transcription factor 3C polypeptide 4 isoform 1 [Mus musculus]	52	1	[K].VGSKTEVAECKEK.[F]	VGSkTEVAECKEK	[K4](Biotin)	564.277	3	119	2	CLLKVGSkTEVAECK	260436918	1	0	0	0	1	0	0	0	217707	0	0	0				119
2210018M11Rik	233545	568950187	XP_006507678.1	protein EMSY isoform X1 [Mus musculus]	80	1	[K].TTQQLPKLQQAPNQPK.[I]	TTQQLPkLQQAPNQPK	[K7](Biotin)	682.698	3	1072	1	KTTQQLPkLQQAPNQ	568950187	1	0	0	0	1	0	0	0	590087	0	0	0				1072
Ints12	71793	21313674	NP_082203.1	integrator complex subunit 12 [Mus musculus]	53	1	[K].IGSGNSTSPSVPLKPLPPLTLGK.[T]	IGSGNSTSPSVPLkPLPPLTLGK	[K14](Biotin)	829.463	3	360	0	TSPSVPLkPLPPLTL	21313674	1	1	0	0	2	2	0	0	1.77217e+06	172315	0	0				360
Ppp1r10	52040	255308881	NP_001157290.1	serine/threonine-protein phosphatase 1 regulatory subunit 10 [Mus musculus]	66	1	[K].NSSTVVVSDKYNLKPIPLKR.[Q]	NSSTVVVSDkYNLKPIPLKR	[K10](Biotin)	621.849	4	235	2	STVVVSDkYNLKPIP	255308881	1	1	0	0	1	3	0	0	2.48815e+06	31694.7	0	0				235
Hist1h3a	360198	32880233	NP_038578.2	histone H3.1 [Mus musculus]	13	2	[R].KSAPATGGVK.[K]	kSAPATGGVK	[K1](Biotin)	571.307	2	28	1	LATKAARkSAPATGG	32880233	1	1	1	0	1	1	1	0	373164	34266.3	281211	0	5; 19; 24; 28	8	4	5; 19; 24; 28; 123
Hist1h3a	360198	32880233	NP_038578.2	histone H3.1 [Mus musculus]	13	2	[R].KQLATK.[A]	kQLATK	[K1](Biotin)	457.76	2	19	1	TGGKAPRkQLATKAA	32880233	0	1	1	1	0	2	1	1	0	3845055	9748534	7.72941e+06	5; 19; 24; 28	8	4	5; 19; 24; 28; 123
Hist1h3a	360198	32880233	NP_038578.2	histone H3.1 [Mus musculus]	13	2	[R].KQLATKAAR.[K]	KQLATkAAR	[K6](Biotin)	606.848	2	24	2	PRKQLATkAARKSAP	32880233	1	1	1	1	2	2	2	2	1.40444e+07	1.95366e+06	6.73171e+06	5889504	5; 19; 24; 28	8	4	5; 19; 24; 28; 123
Hist1h3a	360198	32880233	NP_038578.2	histone H3.1 [Mus musculus]	13	2	[K].RVTIMPKDIQLAR.[R]	RVTIMPkDIQLAR	[K7](Biotin)	589.664	3	123	2	KRVTIMPkDIQLARR	32880233	1	0	0	0	1	0	0	0	276752	0	0	0	5; 19; 24; 28	8	4	5; 19; 24; 28; 123
Hist1h3a	360198	32880233	NP_038578.2	histone H3.1 [Mus musculus]	13	2	[R].TKQTAR.[K]	TkQTAR	[K2](Biotin)	465.745	2	5	1	MARTkQTARKST	32880233	1	1	1	0	1	1	1	0	3.04333e+06	607122	1.5106e+06	0	5; 19; 24; 28	8	4	5; 19; 24; 28; 123
Mafg	17134	6754610	NP_034886.1	transcription factor MafG [Mus musculus]	17	1	[R].GPLAAGLGPLVPGKVAATSVITIVK.[S]	GPLAAGLGPLVPGkVAATSVITIVK	[K14](Biotin)	852.506	3	144	1	LGPLVPGkVAATSVI	6754610	1	0	0	0	1	0	0	0	621252	0	0	0				144
Ubn1	170644	71534247	NP_080942.1	ubinuclein-1 [Mus musculus]	120	1	[R].TSHGPQAAAPVPGPQVKVFHAGTQQQK.[S]	TSHGPQAAAPVPGPQVkVFHAGTQQQK	[K17](Biotin)	748.885	4	805	1	PVPGPQVkVFHAGTQ	71534247	1	1	0	0	1	1	0	0	391811	24524.3	0	0				805
Cdkn2aip	70925	27369527	NP_765995.1	CDKN2A-interacting protein [Mus musculus]	47	1	[K].STAQVAASLLATKSGASLGSVSQLAAK.[S]	STAQVAASLLATkSGASLGSVSQLAAK	[K13](Biotin)	686.623	4	367	1	AASLLATkSGASLGS	27369527	1	0	0	0	1	0	0	0	83642.9	0	0	0				367
Zfml	18139	568941002	XP_006505767.1	zinc finger protein 638 isoform X1 [Mus musculus]	191	1	[K].FTQAGAQKMK.[R]	FTQAGAQkMK	[K8](Biotin)	668.331	2	497	1	FTQAGAQkMKRLPTP	568941002	1	1	0	0	1	1	0	0	1.28878e+06	120269	0	0				497
Hmgxb4	70823	568957557	XP_006531425.1	HMG domain-containing protein 4 isoform X1 [Mus musculus]	82	1	[K].MKPLYVNTETLTLREPDGLKMK.[L]	MKPLYVNTETLTLREPDGLKMK	[K](Biotin)			X	2
Sgol2a	68549	51092285	NP_950172.1	shugoshin-like 2 isoform 1 [Mus musculus]	130	1	[K].FLQDGKFDLCQKTLHHNLSKPSR.[Q]	FLQDGKFDLCQkTLHHNLSKPSR	[K12](Biotin)	599.907	5	508	2	GKFDLCQkTLHHNLS	51092285	1	0	0	0	1	0	0	0	1.52041e+06	0	0	0				508
Nsd1	18193	568983119	XP_006517200.1	histone-lysine N-methyltransferase, H3 lysine-36 and H4 lysine-20 specific isoform X1 [Mus musculus]	225	1	[K].HVLSELKELSYR.[S]	HVLSELkELSYR	[K7](Biotin)	567.298	3	864	1	KHVLSELkELSYRSL	568983119	1	1	0	0	1	1	0	0	81975.7	36986.6	0	0				864
Kdm6b	216850	755538168	XP_011247225.1	lysine-specific demethylase 6B isoform X1 [Mus musculus]	67	1	[K].SLASVLEGQKYCYR.[G]	SLASVLEGQkYCYR	[K10](Biotin)	633.975	3	817	1	ASVLEGQkYCYRGTG	755538168	0	1	0	0	0	1	0	0	0	14498.5	0	0				817
Pnisr	66625	226437597	NP_079945.1	arginine/serine-rich protein PNISR [Mus musculus]	72	1	[R].SGSISVKVIR.[H]	SGSISVkVIR	[K7](Biotin)	636.361	2	730	1	RSGSISVkVIRHDSR	226437597	1	0	0	0	1	0	0	0	1.06063e+06	0	0	0				730
BirA_mCh_m6a	215	215	215		57	2	[-].MEQKLISEEDLDKDNTVPLK.[L]	MEQkLISEEDLDKDNTVPLK	[K4](Biotin)	871.767	3	4	2	MEQkLISEEDL	215	0	0	1	1	0	0	4	4	0	0	8.49984e+06	9.8042e+06	4; 194; 288; 294; 318	73	5	194; 288; 294; 609; 631; 637; 704; 710
BirA_mCh_m6a	215	215	215		57	2	[R].GIDKQGALLLEQDGIIKPWMGGEISLR.[S]	GIDKQGALLLEQDGIIKPWMGGEISLR	[K](Biotin)			X	1
BirA_mCh_m6a	215	215	215		57	2	[R].WEKLDNFINRPVKLIIGDKEIFGISR.[G]	WEKLDNFINRPVKLIIGDKEIFGISR	[K](Biotin)			X	3
BirA_mCh_m6a	215	215	215		57	2	[K].QGALLLEQDGIIKPWMGGEISLR.[S]	QGALLLEQDGIIkPWMGGEISLR	[K13](Biotin)	917.485	3	318	0	LEQDGIIkPWMGGEI	215	0	0	1	0	0	0	1	0	0	0	215831	0	4; 194; 288; 294; 318	73	5	194; 288; 294; 609; 631; 637; 704; 710
BirA_mCh_m6a	215	215	215		57	2	[R].GIDKQGALLLEQDGIIKPWMGGEISLR.[S]	GIDKQGALLLEQDGIIKPWMGGEISLR	[K](Biotin)			X	1
BirA_mCh_m6a	215	215	215		57	2	[R].KLAGILVELTGK.[T]	kLAGILVELTGK	[K1](Biotin)	734.434	2	194	1	DLYLQDRkLAGILVE	215	1	1	1	1	2	1	6	10	624030	24326.4	4.61296e+07	8.10889e+07	4; 194; 288; 294; 318	73	5	194; 288; 294; 609; 631; 637; 704; 710
BirA_mCh_m6a	215	215	215		57	2	[K].LDNFINRPVKLIIGDKEIFGISR.[G]	LDNFINRPVkLIIGDKEIFGISR	[K10](Biotin)	721.654	4	288	2	NFINRPVkLIIGDKE	215	1	0	1	1	1	0	3	8	162264	0	6.86682e+06	1.52829e+07	4; 194; 288; 294; 318	73	5	194; 288; 294; 609; 631; 637; 704; 710
BirA_mCh_m6a	215	215	215		57	2	[K].LIIGDKEIFGISR.[G]	LIIGDkEIFGISR	[K6](Biotin)	843.967	2	294	1	VKLIIGDkEIFGISR	215	1	1	1	1	3	6	17	20	3.87176e+06	336754	3.10759e+08	3.18821e+08	4; 194; 288; 294; 318	73	5	194; 288; 294; 609; 631; 637; 704; 710
BirA_mCh_m6a	215	215	215		57	1	[R].DKEIIEFKGR.[G]	DKEIIEFkGR	[K8](Biotin)	487.591	3	710	2	DKEIIEFkGRGKYRK	215	1	1	0	0	1	1	0	0	291800	37422.6	0	0	4; 194; 288; 294; 318	73	5	194; 288; 294; 609; 631; 637; 704; 710
BirA_mCh_m6a	215	215	215		57	1	[K].EFKQGLFLR.[K]	EFkQGLFLR	[K3](Biotin)	682.364	2	637	1	EKVTKEFkQGLFLRK	215	1	1	0	0	1	2	0	0	2120190	195087	0	0	4; 194; 288; 294; 318	73	5	194; 288; 294; 609; 631; 637; 704; 710
BirA_mCh_m6a	215	215	215		57	1	[R].HSTGGMDELYKSQVPSK.[G]	HSTGGMDELYkSQVPSK	[K11](Biotin)	697.33	3	609	1	GGMDELYkSQVPSKG	215	1	1	0	0	1	1	0	0	1.85385e+06	147147	0	0	4; 194; 288; 294; 318	73	5	194; 288; 294; 609; 631; 637; 704; 710
BirA_mCh_m6a	215	215	215		57	1	[R].DKEIIEFK.[G]	DkEIIEFK	[K2](Biotin)	624.321	2	704	1	QLQILRDkEIIEFKG	215	1	1	0	0	1	1	0	0	364550	47590.4	0	0	4; 194; 288; 294; 318	73	5	194; 288; 294; 609; 631; 637; 704; 710
BirA_mCh_m6a	215	215	215		57	1	[R].IFLVQDGQVRDPEKVTK.[E]	IFLVQDGQVRDPEkVTK	[K14](Biotin)	733.393	3	631	2	GQVRDPEkVTKEFKQ	215	1	0	0	0	1	0	0	0	606522	0	0	0	4; 194; 288; 294; 318	73	5	194; 288; 294; 609; 631; 637; 704; 710
BirA_mCh_m6a	215	215	215		57	1	[R].IFLVQDGQVRDPEKVTKEFK.[Q]	IFLVQDGQVRDPEKVTKEFK	[K](Biotin)			X	3
BirA_mCh_m6a	215	215	215		57	1	[K].EFKQGLFLRK.[S]	EFkQGLFLRK	[K3](Biotin)	497.943	3	637	2	EKVTKEFkQGLFLRK	215	1	0	0	0	1	0	0	0	904800	0	0	0	4; 194; 288; 294; 318	73	5	194; 288; 294; 609; 631; 637; 704; 710
BirA_mCh_m6a	215	215	215		57	1	[R].HSTGGMDELYKSQVPSKGR.[I]	HSTGGMDELYkSQVPSKGR	[K11](Biotin)	768.37	3	609	2	GGMDELYkSQVPSKG	215	1	0	0	0	1	0	0	0	0	0	0	0	4; 194; 288; 294; 318	73	5	194; 288; 294; 609; 631; 637; 704; 710
Zfp609	214812	209447068	NP_766124.2	zinc finger protein 609 [Mus musculus]	129	1	[R].SATPKVR.[L]	SATPkVR	[K5](Biotin)	492.768	2	567	1	PARSATPkVRLVEPH	209447068	0	1	0	0	0	1	0	0	0	28377.3	0	0				567
Tcf7l2	21416	569006774	XP_006526922.1	transcription factor 7-like 2 isoform X7 [Mus musculus]	41	1	[R].TYLQMKWPLLDVQAGSLQSR.[Q]	TYLQMkWPLLDVQAGSLQSR	[K6](Biotin)	854.107	3	132	1	ARTYLQMkWPLLDVQ	569006774	1	0	0	0	1	0	0	0	228349	0	0	0				132
Junb	16477	6680512	NP_032442.1	transcription factor jun-B [Mus musculus]	19	1	[K].VMTHVSNGCQLLLGVKGHAF.[-]	VMTHVSNGCQLLLGVkGHAF	[K16](Biotin)	798.737	3	340	1	CQLLLGVkGHAF	6680512	1	1	0	0	1	1	0	0	1483604	72600.5	0	0				33; 340
Junb	16477	6680512	NP_032442.1	transcription factor jun-B [Mus musculus]	19	1	[R].SPGSLSLHDYKLLKPTLALNLADPYR.[G]	SPGSLSLHDYkLLKPTLALNLADPYR	[K11](Biotin)	777.92	4	33	1	SLSLHDYkLLKPTLA	6680512	1	0	0	0	1	0	0	0	93930	0	0	0				33; 340
Dot1l	208266	755534307	XP_011241692.1	histone-lysine N-methyltransferase, H3 lysine-79 specific isoform X1 [Mus musculus]	98	1	[R].LSPAKIVLR.[R]	LSPAkIVLR	[K5](Biotin)	611.87	2	776	1	YTRLSPAkIVLRRHL	755534307	1	0	0	0	1	0	0	0	424608	0	0	0				776
Tead4	21679	148352315	NP_035697.3	transcriptional enhancer factor TEF-3 isoform a [Mus musculus]	27	1	[K].ALQSMAAMSSAQIVSATAFHSKMALAR.[G]	ALQSMAAMSSAQIVSATAFHSkMALAR	[K22](Biotin)	752.126	4	140	1	SATAFHSkMALARGP	148352315	1	0	0	0	1	0	0	0	196786	0	0	0				140
Phc3	241915	568920912	XP_006535530.1	polyhomeotic-like protein 3 isoform X1 [Mus musculus]	29	1	[K].VFSLKVYQVEDVCEEEMPEESDECAR.[M]	VFSLkVYQVEDVCEEEMPEESDECAR	[K5](Biotin)	1135.16	3	610	1	LHKVFSLkVYQVEDV	568920912	1	0	0	0	1	0	0	0	228381	0	0	0				610
Gpatch1	67471	13385692	NP_080457.1	G patch domain-containing protein 1 [Mus musculus]	92	1	[R].RLKCLPLR.[R]	RLkCLPLR	[K3](Biotin)	427.914	3	923	2	QELLRRLkCLPLRRQ	13385692	1	0	0	0	1	0	0	0	463635	0	0	0				923
Gpatch1	67471	13385692	NP_080457.1	G patch domain-containing protein 1 [Mus musculus]	92	1	[R].LKCLPLR.[R]	LkCLPLR	[K2](Biotin)	563.318	2	923	1	QELLRRLkCLPLRRQ	13385692	0	1	0	0	0	1	0	0	0	34603.8	0	0				923
Zfp281	226442	237681154	NP_001153723.1	zinc finger protein 281 [Mus musculus]	58	1	[K].RVPKLIFKK.[G]	RVPkLIFKK	[K4](Biotin)	452.284	3	461	3	ELQKRVPkLIFKKGS	237681154	1	0	0	0	1	0	0	0	363674	0	0	0				461; 596
Zfp281	226442	237681154	NP_001153723.1	zinc finger protein 281 [Mus musculus]	58	1	[K].RVPKLIFK.[K]	RVPkLIFK	[K4](Biotin)	409.586	3	461	2	ELQKRVPkLIFKKGS	237681154	1	0	0	0	1	0	0	0	410722	0	0	0				461; 596
Zfp281	226442	237681154	NP_001153723.1	zinc finger protein 281 [Mus musculus]	58	1	[K].SCHDKSGIPDEVLQSILDQYSGK.[S]	SCHDkSGIPDEVLQSILDQYSGK	[K5](Biotin)	934.777	3	596	1	EIKSCHDkSGIPDEV	237681154	1	0	0	0	1	0	0	0	389308	0	0	0				461; 596
Zc3h4	330474	568946013	XP_006540165.1	zinc finger CCCH domain-containing protein 4 isoform X1 [Mus musculus]	74	1	[R].ILKTVNVNTPGQSEKPSDPR.[V]	ILkTVNVNTPGQSEKPSDPR	[K3](Biotin)	802.753	3	1056	1	ELLSRILkTVNVNTP	568946013	1	0	0	0	1	0	0	0	1.2929e+06	0	0	0				1056
Sept9	53860	568974836	XP_006533807.1	septin-9 isoform X2 [Mus musculus]	40	1	[R].ITALKR.[S]	ITALkR	[K5](Biotin)	464.276	2	10	1	RDRITALkRSFEVEE	568974836	0	1	0	0	0	1	0	0	0	31864.7	0	0				10
Ankrd11	77087	323423025	NP_001074848.2	ankyrin repeat domain-containing protein 11 [Mus musculus]	315	1	[K].ANSFISIPKMEVK.[S]	ANSFISIPkMEVK	[K9](Biotin)	563.962	3	385	1	NSFISIPkMEVKSYS	323423025	1	0	0	0	1	0	0	0	108057	0	0	0				385
Ankrd17	81702	568936351	XP_006535350.1	ankyrin repeat domain-containing protein 17 isoform X1 [Mus musculus]	131	1	[K].KQPSVLVTFPKEERK.[S]	KQPSVLVTFPkEERK	[K11](Biotin)	503.781	4	1947	3	SVLVTFPkEERKSVS	568936351	1	0	0	0	1	0	0	0	199035	0	0	0				1947
Mcph1	244329	755524470	XP_011240358.1	microcephalin isoform X1 [Mus musculus]	72	1	[K].SALAIQLFKSDQSPPSTIR.[L]	SALAIQLFkSDQSPPSTIR	[K9](Biotin)	762.405	3	405	1	ALAIQLFkSDQSPPS	755524470	1	0	0	0	1	0	0	0	325505	0	0	0				405
Map4	17758	568963499	XP_006512019.1	microtubule-associated protein 4 isoform X2 [Mus musculus]	91	1	[K].DMSPLPESEVTLGKDVVILPETK.[V]	DMSPLPESEVTLGkDVVILPETK	[K14](Biotin)	908.469	3	486	1	ESEVTLGkDVVILPE	568963499	1	0	0	0	1	0	0	0	105548	0	0	0				486
Acin1	56215	568988260	XP_006519359.1	apoptotic chromatin condensation inducer in the nucleus isoform X3 [Mus musculus]	94	2	[R].SISQQKSGVSITIDDPVR.[T]	SISQQkSGVSITIDDPVR	[K6](Biotin)	719.374	3	984	1	RRSISQQkSGVSITI	568988260	1	1	0	0	1	1	0	0	707053	0	0	0				103; 830; 984
Acin1	56215	568988260	XP_006519359.1	apoptotic chromatin condensation inducer in the nucleus isoform X3 [Mus musculus]	94	2	[R].LKGALMLENLQK.[H]	LkGALMLENLQK	[K2](Biotin)	792.438	2	103	1	SALVKRLkGALMLEN	568988260	1	0	0	0	1	0	0	0	172353	0	0	0				103; 830; 984
Acin1	56215	568988260	XP_006519359.1	apoptotic chromatin condensation inducer in the nucleus isoform X3 [Mus musculus]	94	1	[R].KISVVSTKGVQAGNSDTEGGQPGR.[K]	KISVVSTkGVQAGNSDTEGGQPGR	[K8](Biotin)	866.769	3	830	2	KISVVSTkGVQAGNS	568988260	1	1	0	0	1	1	0	0	213551	16798.3	0	0				103; 830; 984
Casc5	76464	125628638	NP_083893.2	protein CASC5 [Mus musculus]	188	1	[K].SICSSPAIEGYKTIFHSSSNDAMELTK.[C]	SICSSPAIEGYkTIFHSSSNDAMELTK	[K12](Biotin)	1067.17	3	405	1	SPAIEGYkTIFHSSS	125628638	1	0	0	0	1	0	0	0	200862	0	0	0				405; 767
Casc5	76464	125628638	NP_083893.2	protein CASC5 [Mus musculus]	188	1	[R].SLLDKHDSHLVSLAGTSKTILHAR.[G]	SLLDKHDSHLVSLAGTSkTILHAR	[K18](Biotin)	565.909	5	767	2	VSLAGTSkTILHARG	125628638	1	0	0	0	1	0	0	0	203697	0	0	0				405; 767
Stat2	20847	568967116	XP_006513496.1	signal transducer and activator of transcription 2 isoform X1 [Mus musculus]	46	1	[R].YKGDMFGQGVDLQNAQVMELLQR.[L]	YkGDMFGQGVDLQNAQVMELLQR	[K2](Biotin)	961.456	3	289	1	MSHMLRYkGDMFGQG	568967116	1	0	0	0	1	0	0	0	214905	0	0	0				289
Ccdc174	232236	147899958	NP_766318.2	coiled-coil domain-containing protein 174 [Mus musculus]	54	1	[R].GKDFSFGFWSKK.[Q]	GkDFSFGFWSKK	[K2](Biotin)	553.938	3	369	2	IREWDRGkDFSFGFW	147899958	1	0	0	0	1	0	0	0	120395	0	0	0				369
Gatad2a	234366	568955385	XP_006509699.1	transcriptional repressor p66 alpha isoform X2 [Mus musculus]	40	1	[R].GVLHTFSQSPKLQNAASATALVSR.[T]	GVLHTFSQSPkLQNAASATALVSR	[K11](Biotin)	903.81	3	550	1	HTFSQSPkLQNAASA	568955385	0	1	0	0	0	1	0	0	0	89258.5	0	0				550; 576
Gatad2a	234366	568955385	XP_006509699.1	transcriptional repressor p66 alpha isoform X2 [Mus musculus]	40	1	[R].VVGTGKGTASNWKK.[T]	VVGTGkGTASNWKK	[K6](Biotin)	553.628	3	576	2	ERVVGTGkGTASNWK	568955385	1	0	0	0	1	0	0	0	159069	0	0	0				550; 576
Wdhd1	218973	568987294	XP_006518893.1	WD repeat and HMG-box DNA-binding protein 1 isoform X1 [Mus musculus]	74	1	[K].SGAVFSSSQGWVNPFKVVVSSKEPAVSANSTR.[S]	SGAVFSSSQGWVNPFkVVVSSKEPAVSANSTR	[K16](Biotin)	884.694	4	906	2	QGWVNPFkVVVSSKE	568987294	1	0	0	0	1	0	0	0	177207	0	0	0				906
Zfp318	57908	157823950	NP_997554.2	zinc finger protein 318 isoform 1 [Mus musculus]	155	1	[K].IHNLLKTIGLDIGVAEIGK.[L]	IHNLLkTIGLDIGVAEIGK	[K6](Biotin)	744.093	3	626	1	AKIHNLLkTIGLDIG	157823950	1	0	0	0	1	0	0	0	130052	0	0	0				626
Prkcdbp	109042	22324938	NP_082720.1	protein kinase C delta-binding protein [Mus musculus]	11	1	[R].KAAQPTPVKPPR.[V]	KAAQPTPVkPPR	[K9](Biotin)	505.954	3	205	1	AAQPTPVkPPRVGPV	22324938	1	0	0	0	1	0	0	0	136190	0	0	0				205
Phf3	213109	124487309	NP_001074549.1	PHD finger protein 3 [Mus musculus]	185	1	[R].MAPPIDDLSPKTVK.[V]	MAPPIDDLSPkTVK	[K11](Biotin)	579.967	3	1114	1	PIDDLSPkTVKVVVG	124487309	1	0	0	0	1	0	0	0	144101	0	0	0				1114
Jun	16476	6754402	NP_034721.1	transcription factor AP-1 [Mus musculus]	18	1	[K].ILKQSMTLNLADPVGSLKPHLR.[A]	ILkQSMTLNLADPVGSLKPHLR	[K3](Biotin)	665.122	4	35	1	YSNPKILkQSMTLNL	6754402	1	0	0	0	1	0	0	0	86199.8	0	0	0				35
Jun	16476	6754402	NP_034721.1	transcription factor AP-1 [Mus musculus]	18	1	[K].METTFYDDALNASFLQSESGAYGYSNPKILK.[Q]	METTFYDDALNASFLQSESGAYGYSNPKILK	[K](Biotin)			X	1
D430041D05Rik	241589	755499611	XP_011237828.1	UPF0606 protein KIAA1549L homolog isoform X1 [Mus musculus]	87	1	[R].FKRATTLGSYTVQMVK.[M]	FKRATTLGSYTVQMVk	[K16](Biotin)	412.019	5	1415	2	SYTVQMVkMQRVPGP	755499611	1	0	0	0	1	0	0	0	0	0	0	0				1415
Rbm10	236732	21704124	NP_663602.1	RNA-binding protein 10 isoform 1 [Mus musculus]	50	2	[R].WMEANQHSLNILGQKVSMHYSDPKPK.[I]	WMEANQHSLNILGQkVSMHYSDPKPK	[K15](Biotin)	653.721	5	201	1	SLNILGQkVSMHYSD	21704124	1	1	1	1	2	4	1	1	7.93426e+06	1.76094e+06	1.43791e+06	1.05871e+06	201	4	1	201; 920
Rbm10	236732	21704124	NP_663602.1	RNA-binding protein 10 isoform 1 [Mus musculus]	50	2	[R].GSSYGVTSTESYKETLHKTMVTR.[F]	GSSYGVTSTESYKETLHkTMVTR	[K18](Biotin)	697.84	4	920	2	SYKETLHkTMVTRFN	21704124	1	1	0	0	1	1	0	0	519118	68558.1	0	0	201	4	1	201; 920
Rbm10	236732	21704124	NP_663602.1	RNA-binding protein 10 isoform 1 [Mus musculus]	50	2	[R].WMEANQHSLNILGQKVSMHYSDPKPK.[I]	WMEANQHSLNILGQkVSMHYSDPKPK	[K15](Biotin)	653.721	5	201	1	SLNILGQkVSMHYSD	21704124	1	1	1	1	2	4	1	1	7.93426e+06	1.76094e+06	1.43791e+06	1.05871e+06	201	4	1	201; 920
Zfp532	328977	569004086	XP_006526107.1	zinc finger protein 532 isoform X2 [Mus musculus]	120	1	[K].LVPKTVHLANLNLLPQGAQATSELR.[Q]	LVPkTVHLANLNLLPQGAQATSELR	[K4](Biotin)	728.158	4	519	1	ANAKLVPkTVHLANL	569004086	1	0	0	0	1	0	0	0	107883	0	0	0				519
Smco1	69576	281427239	NP_899106.2	single-pass membrane and coiled-coil domain-containing protein 1 [Mus musculus]	17	1	[R].MYIKDVSFMITNMVK.[N]	MYIKDVSFMITNMVk	[K15](Biotin)	512.254	4	174	1	FMITNMVkNQALQDG	281427239	1	1	0	0	1	1	0	0	0	0	0	0				174
Igf2bp3	140488	225543383	NP_076159.3	insulin-like growth factor 2 mRNA-binding protein 3 [Mus musculus]	47	1	[K].FTEEIPLKILAHNNFVGR.[L]	FTEEIPLkILAHNNFVGR	[K8](Biotin)	775.412	3	280	1	FTEEIPLkILAHNNF	225543383	1	0	0	0	1	0	0	0	0	0	0	0				280
Rp9	55934	9055300	NP_061209.1	retinitis pigmentosa 9 protein homolog [Mus musculus]	34	1	[R].EFLAHAPTKGLWMPLGR.[E]	EFLAHAPTkGLWMPLGR	[K9](Biotin)	717.373	3	82	1	FLAHAPTkGLWMPLG	9055300	1	0	0	0	1	0	0	0	0	0	0	0				82
Luzp1	269593	119433663	NP_077772.2	leucine zipper protein 1 [Mus musculus]	98	1	[R].AIIKPVIIDKDVKK.[I]	AIIKPVIIDKDVKK	[K](Biotin)			X	2

## Sheet: Unambiguous Peptides
Gene symbol	Gene ID	Database ID	RefSeq Accession	Protein Description	# Lysines	# Biotin Sites	Biotin Sites	# PSMs for Peptide	# PSMs Biotinylated for Peptide	# PSMs Biotinylated for Protein	# PSMs for Protein	# Protein Groups	# Peptides	# Unique Peptides	Annotated Sequence	Peptide Sequence	Peptide Modifications	m/z [Da]	Charge	# Protein Groups	Protein Positions	# Missed Cleavages	Peptide Window	MW [kDa]	calc. pI	Master Protein Accessions	m6A-tracer-BioID alone_REP1.raw - #Biotin sites	m6A-tracer-BioID alone_REP2.raw - #Biotin sites	LAP2 BioID_REP1.raw - #Biotin sites	LAP2 BioID_REP2.raw - #Biotin sites	m6A-tracer-BioID alone_REP1.raw - #PSMs	m6A-tracer-BioID alone_REP2.raw - #PSMs	LAP2 BioID_REP1.raw - #PSMs	LAP2 BioID_REP2.raw - #PSMs	m6A-tracer-BioID alone_REP1.raw - Abundance	m6A-tracer-BioID alone_REP2.raw - Abundance	LAP2 BioID_REP1.raw - Abundance	LAP2 BioID_REP2.raw - Abundance	m6A-tracer-BioID alone - #PSMs	LAP2 BioID - #PSMs	LAP2 BioID - Biotin sites	LAP2 BioID_REP2.raw - Protein Abundance	LAP2 BioID_REP1.raw - Protein Abundance	LAP2 BioID - Total #PSMs	LAP2 BioID - #Biotin sites	m6A-tracer-BioID alone - Biotin sites	m6A-tracer-BioID alone_REP2.raw - Protein Abundance	m6A-tracer-BioID alone_REP1.raw - Protein Abundance	m6A-tracer-BioID alone - Total #PSMs
Tmem199	195040	72384367	NP_954669.2	transmembrane protein 199 [Mus musculus]	9	1	107	2	2	2	2	1	1	1	[K].IKIQLANEEYKR.[I]	IkIQLANEEYKR	[K2](Biotin)	577.647	3	1	107	2	VARLEKIkIQLANEE	23.1	9.1	72384367	0	0	1	1	0	0	1	1	0	0	1.17226e+06	891697	0	2	107	891697	1.17226e+06	2	1
Tor1aip1	208263	229608946	NP_001153490.1	torsin-1A-interacting protein 1 isoform 1 [Mus musculus]	27	2	89; 123	1	1	2	3	1	3	3	[R].TPPEKFRPASAGEEVR.[E]	TPPEkFRPASAGEEVR	[K5](Biotin)	666.335	3	1	89	1	GRRTPPEkFRPASAG	64.8	7.14	229608946	0	0	0	1	0	0	0	1	0	0	0	215098	0	1	89; 123	215098	107711	2	2
Tor1aip1	208263	229608946	NP_001153490.1	torsin-1A-interacting protein 1 isoform 1 [Mus musculus]	27	2	89; 123	1	1	2	3	1	3	3	[R].RAQEAEEMKTRR.[S]	RAQEAEEMkTRR	[K9](Biotin)	577.619	3	1	123	3	AQEAEEMkTRRSARL	64.8	7.14	229608946	0	0	1	0	0	0	1	0	0	0	107711	0	0	1	89; 123	215098	107711	2	2
Efhd2	27984	31981086	NP_080270.2	EF-hand domain-containing protein D2 [Mus musculus]	22	1	197	1	1	1	4	1	2	2	[K].NFFEAKVQAINVSSR.[F]	NFFEAkVQAINVSSR	[K6](Biotin)	645.996	3	1	197	1	AKNFFEAkVQAINVS	26.8	5.14	31981086	0	0	1	0	0	0	1	0	0	0	36966.2	0	0	1	197	0	36966.2	1	1
Vapa	30960	569000519	XP_006524448.1	vesicle-associated membrane protein-associated protein A isoform X1 [Mus musculus]	26	1	192	2	2	2	2	1	1	1	[K].AVPLNASKQDGPLPKPHSVSLNDTETR.[K]	AVPLNASkQDGPLPKPHSVSLNDTETR	[K8](Biotin)	775.15	4	1	192	1	AVPLNASkQDGPLPK	31.7	8.59	569000519	0	0	1	1	0	0	1	1	0	0	1.30419e+06	1.12936e+06	0	2	192	1.12936e+06	1.30419e+06	2	1
Ube2j1	56228	31980960	NP_062532.2	ubiquitin-conjugating enzyme E2 J1 [Mus musculus]	16	1	8	2	2	4	4	1	2	2	[R].YNLKSPAVK.[R]	YNLkSPAVK	[K4](Biotin)	623.337	2	1	8	1	METRYNLkSPAVKRL	35	6.99	31980960	0	0	1	1	0	0	1	1	0	0	610994	470547	0	2	8	1.30933e+06	1.85772e+06	4	1
Ube2j1	56228	31980960	NP_062532.2	ubiquitin-conjugating enzyme E2 J1 [Mus musculus]	16	1	8	2	2	4	4	1	2	2	[R].YNLKSPAVKR.[L]	YNLkSPAVKR	[K4](Biotin)	467.927	3	1	8	2	METRYNLkSPAVKRL	35	6.99	31980960	0	0	1	1	0	0	1	1	0	0	1.24673e+06	838781	0	2	8	1.30933e+06	1.85772e+06	4	1
Gpkow	209416	125991228	NP_776108.2	G patch domain and KOW motifs-containing protein [Mus musculus]	30	1	54	1	1	1	2	1	2	2	[R].KLQSVNPPEAPK.[E]	kLQSVNPPEAPK	[K1](Biotin)	767.41	2	1	54	1	LATVEGRkLQSVNPP	53.8	8.07	125991228	1	0	0	0	1	0	0	0	0	0	0	0	1	0						54	0	0	1
Ano6	105722	359465539	NP_001240742.1	anoctamin-6 isoform 1 [Mus musculus]	56	1	188	1	1	1	1	1	1	1	[R].SPFGNLNWFTKVLR.[V]	SPFGNLNWFTkVLR	[K11](Biotin)	635.666	3	1	188	1	GNLNWFTkVLRVNES	108.4	6.79	359465539	0	0	1	0	0	0	1	0	0	0	31029.3	0	0	1	188	0	31029.3	1	1
Ptpn2	19255	187608416	NP_001120649.1	tyrosine-protein phosphatase non-receptor type 2 isoform b [Mus musculus]	29	1	312	1	1	1	1	1	1	1	[R].VMVEKYNGKR.[I]	VMVEkYNGKR	[K5](Biotin)	483.916	3	1	312	2	QNRVMVEkYNGKRIG	47.3	8.37	187608416	0	0	0	1	0	0	0	1	0	0	0	52351.8	0	1	312	52351.8	0	1	1
Slc39a7	14977	118150668	NP_001071177.1	zinc transporter SLC39A7 precursor [Mus musculus]	12	1	288	2	2	2	2	1	1	1	[K].EKPSTEEEKEVGGLR.[K]	EKPSTEEEkEVGGLR	[K9](Biotin)	638.647	3	1	288	1	KPSTEEEkEVGGLRK	50.6	6.87	118150668	0	0	1	1	0	0	1	1	0	0	150636	152171	0	2	288	152171	150636	2	1
Senp2	75826	568996500	XP_006522751.1	sentrin-specific protease 2 isoform X1 [Mus musculus]	50	1	133	1	1	1	1	1	1	1	[K].LGNKSPNGISDYPKIR.[V]	LGNKSPNGISDYPkIR	[K14](Biotin)	662.349	3	1	133	2	NGISDYPkIRVTVTR	68.2	9.64	568996500	0	0	1	0	0	0	1	0	0	0	608672	0	0	1	133	0	608672	1	1
Pom121	107939	156231054	NP_683734.2	nuclear envelope pore membrane protein POM 121 [Mus musculus]	45	2	135; 402	2	2	3	3	1	2	2	[R].GISQLWKR.[S]	GISQLWkR	[K7](Biotin)	607.33	2	1	402	1	RGISQLWkRSGPTSS	120.9	10.2	156231054	0	0	1	1	0	0	1	1	0	0	381829	250156	0	2	135; 402	250156	457903	3	2
Pom121	107939	156231054	NP_683734.2	nuclear envelope pore membrane protein POM 121 [Mus musculus]	45	2	135; 402	1	1	3	3	1	2	2	[R].SPLGGPDPAELLLMGSYLGKPGPPEPALRQDPR.[E]	SPLGGPDPAELLLMGSYLGkPGPPEPALRQDPR	[K20](Biotin)	913.724	4	1	135	1	LMGSYLGkPGPPEPA	120.9	10.2	156231054	0	0	1	0	0	0	1	0	0	0	76074	0	0	1	135; 402	250156	457903	3	2
Tmpo	21917	121949769	NP_001073601.1	lamina-associated polypeptide 2 isoform beta [Mus musculus]	31	18	15; 17; 34; 97; 100; 106; 147; 194; 197; 202; 206; 212; 224; 236; 258; 279; 283; X	2	2	241	262	1	44	2	[R].TEHNQVGEKTEER.[R]	TEHNQVGEkTEER	[K9](Biotin)	594.941	3	1	224	1	EHNQVGEkTEERRVD	38.5	9.17	121949769	0	0	1	1	0	0	1	1	0	0	398519	378523	0	2	15; 17; 34; 97; 100; 106; 147; 194; 197; 202; 206; 212; 224; 236; 258; 279; 283	2.00459e+09	2.11867e+09	201	17	34; 212; 279; 283	262954	2.08383e+06	6
Tmpo	21917	121949769	NP_001073601.1	lamina-associated polypeptide 2 isoform beta [Mus musculus]	31	18	15; 17; 34; 97; 100; 106; 147; 194; 197; 202; 206; 212; 224; 236; 258; 279; 283; X	4	4	241	262	1	44	2	[R].RTEHNQVGEKTEER.[R]	RTEHNQVGEkTEER	[K10](Biotin)	646.975	3	1	224	2	EHNQVGEkTEERRVD	38.5	9.17	121949769	0	0	1	1	0	0	2	2	0	0	1.04117e+06	1.5061e+06	0	4	15; 17; 34; 97; 100; 106; 147; 194; 197; 202; 206; 212; 224; 236; 258; 279; 283	2.00459e+09	2.11867e+09	201	17	34; 212; 279; 283	262954	2.08383e+06	6
BirA_LAP2B	33333	33333	33333		55	28	4; 194; 288; 294; 318; 349; 351; 368; 431; 434; 440; 481; 528; 531; 536; 540; 546; 593; 619; 636; 656; 657; 667; 679; 701; 722; 726; X	5	5	490	523	1	63	14	[R].KRVETSQHFR.[I]	kRVETSQHFR	[K1](Biotin)	757.39	2	1	593	2	GSRRTPRkRVETSQH	87.1	8.85	33333	0	0	1	1	0	0	2	3	0	0	1.069e+07	1.26037e+07	0	5	4; 194; 288; 294; 318; 349; 351; 368; 431; 434; 440; 481; 528; 531; 536; 540; 546; 593; 619; 636; 656; 657; 667; 679; 701; 722; 726	4.54174e+09	3.91044e+09	385	27	194; 288; 294; 368; 546; 619; 636; 667; 722; 726	1.28809e+06	8.91624e+06	29
BirA_LAP2B	33333	33333	33333		55	28	4; 194; 288; 294; 318; 349; 351; 368; 431; 434; 440; 481; 528; 531; 536; 540; 546; 593; 619; 636; 656; 657; 667; 679; 701; 722; 726; X	5	5	490	523	1	63	14	[R].TPKKPLTR.[A]	TPkKPLTR	[K3](Biotin)	583.84	2	1	656	1	DITRRTPkKPLTRAE	87.1	8.85	33333	0	0	1	1	0	0	3	2	0	0	3.81753e+07	19134584	0	5	4; 194; 288; 294; 318; 349; 351; 368; 431; 434; 440; 481; 528; 531; 536; 540; 546; 593; 619; 636; 656; 657; 667; 679; 701; 722; 726	4.54174e+09	3.91044e+09	385	27	194; 288; 294; 368; 546; 619; 636; 667; 722; 726	1.28809e+06	8.91624e+06	29
BirA_LAP2B	33333	33333	33333		55	28	4; 194; 288; 294; 318; 349; 351; 368; 431; 434; 440; 481; 528; 531; 536; 540; 546; 593; 619; 636; 656; 657; 667; 679; 701; 722; 726; X	2	13	490	523	1	63	14	[R].RTPKKPLTR.[A]	RTPkkPLTR	[K4; K5](Biotin)	516.955	3	1	656; 657	2	DITRRTPkKPLTRAE; ITRRTPKkPLTRAEV	87.1	8.85	33333	0	0	2	2	0	0	1	1	0	0	743059	557906	0	2	4; 194; 288; 294; 318; 349; 351; 368; 431; 434; 440; 481; 528; 531; 536; 540; 546; 593; 619; 636; 656; 657; 667; 679; 701; 722; 726	4.54174e+09	3.91044e+09	385	27	194; 288; 294; 368; 546; 619; 636; 667; 722; 726	1.28809e+06	8.91624e+06	29
BirA_LAP2B	33333	33333	33333		55	28	4; 194; 288; 294; 318; 349; 351; 368; 431; 434; 440; 481; 528; 531; 536; 540; 546; 593; 619; 636; 656; 657; 667; 679; 701; 722; 726; X	12	12	490	523	1	63	14	[R].AEVGEKTEER.[R]	AEVGEkTEER	[K6](Biotin)	687.325	2	1	667	1	TRAEVGEkTEERRVD	87.1	8.85	33333	1	1	1	1	1	1	4	6	300500	29965.1	120855252	9.64959e+07	2	10	4; 194; 288; 294; 318; 349; 351; 368; 431; 434; 440; 481; 528; 531; 536; 540; 546; 593; 619; 636; 656; 657; 667; 679; 701; 722; 726	4.54174e+09	3.91044e+09	385	27	194; 288; 294; 368; 546; 619; 636; 667; 722; 726	1.28809e+06	8.91624e+06	29
BirA_LAP2B	33333	33333	33333		55	28	4; 194; 288; 294; 318; 349; 351; 368; 431; 434; 440; 481; 528; 531; 536; 540; 546; 593; 619; 636; 656; 657; 667; 679; 701; 722; 726; X	2	2	490	523	1	63	14	[R].AEVGEKTEERR.[V]	AEVGEkTEERR	[K6](Biotin)	510.584	3	1	667	2	TRAEVGEkTEERRVD	87.1	8.85	33333	0	0	1	1	0	0	1	1	0	0	1251828	1.20003e+06	0	2	4; 194; 288; 294; 318; 349; 351; 368; 431; 434; 440; 481; 528; 531; 536; 540; 546; 593; 619; 636; 656; 657; 667; 679; 701; 722; 726	4.54174e+09	3.91044e+09	385	27	194; 288; 294; 368; 546; 619; 636; 667; 722; 726	1.28809e+06	8.91624e+06	29
BirA_LAP2B	33333	33333	33333		55	28	4; 194; 288; 294; 318; 349; 351; 368; 431; 434; 440; 481; 528; 531; 536; 540; 546; 593; 619; 636; 656; 657; 667; 679; 701; 722; 726; X	27	27	490	523	1	63	14	[R].IDGAVISESTPIAETIKASSNESLVANR.[L]	IDGAVISESTPIAETIkASSNESLVANR	[K17](Biotin)	1033.53	3	1	619	1	TPIAETIkASSNESL	87.1	8.85	33333	1	0	1	1	1	0	11	15	0	0	1.49781e+08	1.0868e+08	1	26	4; 194; 288; 294; 318; 349; 351; 368; 431; 434; 440; 481; 528; 531; 536; 540; 546; 593; 619; 636; 656; 657; 667; 679; 701; 722; 726	4.54174e+09	3.91044e+09	385	27	194; 288; 294; 368; 546; 619; 636; 667; 722; 726	1.28809e+06	8.91624e+06	29
BirA_LAP2B	33333	33333	33333		55	28	4; 194; 288; 294; 318; 349; 351; 368; 431; 434; 440; 481; 528; 531; 536; 540; 546; 593; 619; 636; 656; 657; 667; 679; 701; 722; 726; X	24	24	490	523	1	63	14	[R].LTGNFKHASSILPITEFSDITRR.[T]	LTGNFkHASSILPITEFSDITRR	[K6](Biotin)	708.125	4	1	636	2	NRLTGNFkHASSILP	87.1	8.85	33333	1	1	1	1	1	2	8	13	765368	159191	4.44e+08	2.78748e+08	3	21	4; 194; 288; 294; 318; 349; 351; 368; 431; 434; 440; 481; 528; 531; 536; 540; 546; 593; 619; 636; 656; 657; 667; 679; 701; 722; 726	4.54174e+09	3.91044e+09	385	27	194; 288; 294; 368; 546; 619; 636; 667; 722; 726	1.28809e+06	8.91624e+06	29
BirA_LAP2B	33333	33333	33333		55	28	4; 194; 288; 294; 318; 349; 351; 368; 431; 434; 440; 481; 528; 531; 536; 540; 546; 593; 619; 636; 656; 657; 667; 679; 701; 722; 726; X	4	4	490	523	1	63	14	[K].ASSNESLVANRLTGNFKHASSILPITEFSDITR.[R]	ASSNESLVANRLTGNFkHASSILPITEFSDITR	[K17](Biotin)	951.236	4	1	636	2	NRLTGNFkHASSILP	87.1	8.85	33333	0	0	1	1	0	0	1	3	0	0	821911	1.48662e+06	0	4	4; 194; 288; 294; 318; 349; 351; 368; 431; 434; 440; 481; 528; 531; 536; 540; 546; 593; 619; 636; 656; 657; 667; 679; 701; 722; 726	4.54174e+09	3.91044e+09	385	27	194; 288; 294; 368; 546; 619; 636; 667; 722; 726	1.28809e+06	8.91624e+06	29
BirA_LAP2B	33333	33333	33333		55	28	4; 194; 288; 294; 318; 349; 351; 368; 431; 434; 440; 481; 528; 531; 536; 540; 546; 593; 619; 636; 656; 657; 667; 679; 701; 722; 726; X	45	45	490	523	1	63	14	[R].LTGNFKHASSILPITEFSDITR.[R]	LTGNFkHASSILPITEFSDITR	[K6](Biotin)	891.796	3	1	636	1	NRLTGNFkHASSILP	87.1	8.85	33333	1	1	1	1	1	3	9	32	1108492	474897	654422587	1.59513e+09	4	41	4; 194; 288; 294; 318; 349; 351; 368; 431; 434; 440; 481; 528; 531; 536; 540; 546; 593; 619; 636; 656; 657; 667; 679; 701; 722; 726	4.54174e+09	3.91044e+09	385	27	194; 288; 294; 368; 546; 619; 636; 667; 722; 726	1.28809e+06	8.91624e+06	29
BirA_LAP2B	33333	33333	33333		55	28	4; 194; 288; 294; 318; 349; 351; 368; 431; 434; 440; 481; 528; 531; 536; 540; 546; 593; 619; 636; 656; 657; 667; 679; 701; 722; 726; X	1	1	490	523	1	63	14	[R].IDGAVISESTPIAETIKASSNESLVANRLTGNFK.[H]	IDGAVISESTPIAETIkASSNESLVANRLTGNFK	[K17](Biotin)	1253.64	3	1	619	2	TPIAETIkASSNESL	87.1	8.85	33333	0	0	1	0	0	0	1	0	0	0	0	0	0	1	4; 194; 288; 294; 318; 349; 351; 368; 431; 434; 440; 481; 528; 531; 536; 540; 546; 593; 619; 636; 656; 657; 667; 679; 701; 722; 726	4.54174e+09	3.91044e+09	385	27	194; 288; 294; 368; 546; 619; 636; 667; 722; 726	1.28809e+06	8.91624e+06	29
Tmem214	68796	31559970	NP_653108.2	transmembrane protein 214 [Mus musculus]	42	1	66	1	1	3	3	1	2	2	[R].GFEKIMK.[R]	GFEkIMK	[K4](Biotin)	539.775	2	1	66	1	LYERGFEkIMKRQNK	76.4	9.29	31559970	0	0	0	1	0	0	0	1	0	0	0	783548	0	1	66	2.57356e+06	1.88287e+06	3	1
Tmem214	68796	31559970	NP_653108.2	transmembrane protein 214 [Mus musculus]	42	1	66	2	2	3	3	1	2	2	[R].GFEKIMKR.[Q]	GFEkIMKR	[K4](Biotin)	412.22	3	1	66	2	LYERGFEkIMKRQNK	76.4	9.29	31559970	0	0	1	1	0	0	1	1	0	0	1.88287e+06	1.79001e+06	0	2	66	2.57356e+06	1.88287e+06	3	1
Cdkal1	68916	21617853	NP_653119.1	threonylcarbamoyladenosine tRNA methylthiotransferase isoform 1 [Mus musculus]	43	2	37; 64	1	1	2	2	1	2	2	[R].KHVFPKVR.[R]	KHVFPkVR	[K6](Biotin)	412.906	3	1	37	2	SRKHVFPkVRRRNTQ	65.2	7.65	21617853	0	0	1	0	0	0	1	0	0	0	221649	0	0	1	37; 64	0	415435	2	2
Cdkal1	68916	21617853	NP_653119.1	threonylcarbamoyladenosine tRNA methylthiotransferase isoform 1 [Mus musculus]	43	2	37; 64	1	1	2	2	1	2	2	[K].YLQEEPRPPSDSTIPGIQKIWIR.[T]	YLQEEPRPPSDSTIPGIQkIWIR	[K19](Biotin)	983.85	3	1	64	1	STIPGIQkIWIRTWG	65.2	7.65	21617853	0	0	1	0	0	0	1	0	0	0	193785	0	0	1	37; 64	0	415435	2	2
Vangl1	229658	260099697	NP_808213.2	vang-like protein 1 [Mus musculus]	26	1	312	1	4	4	4	1	1	1	[K].HMAGLKVYNVDGPSNNATGQSR.[A]	HMAGLkVYNVDGPSNNATGQSR	[K6](Biotin)	848.071	3	1	312	1	AKHMAGLkVYNVDGP	60	8.81	260099697	0	0	1	1	0	0	3	1	0	0	2.5484e+06	1.1383e+06	0	4	312	2276601	5.0968e+06	8	1
Vangl1	229658	260099697	NP_808213.2	vang-like protein 1 [Mus musculus]	26	1	312	3	4	4	4	1	1	1	[K].HMAGLKVYNVDGPSNNATGQSR.[A]	HMAGLkVYNVDGPSNNATGQSR	[K6](Biotin)	848.071	3	1	312	1	AKHMAGLkVYNVDGP	60	8.81	260099697	0	0	1	1	0	0	3	1	0	0	2.5484e+06	1.1383e+06	0	4	312	2276601	5.0968e+06	8	1
Arl6ip6	65103	254281227	NP_075365.3	ADP-ribosylation factor-like protein 6-interacting protein 6 [Mus musculus]	7	1	86	1	1	1	1	1	1	1	[R].VGDGSPVLPDKR.[N]	VGDGSPVLPDkR	[K11](Biotin)	733.378	2	1	86	1	GSPVLPDkRNGIFPA	24.9	7.77	254281227	0	0	1	0	0	0	1	0	0	0	1.35544e+06	0	0	1	86	0	1.35544e+06	1	1
Atp6ap2	70495	21361250	NP_081715.1	renin receptor precursor [Mus musculus]	14	1	346	1	3	4	4	1	2	2	[R].MTNQKIR.[I]	MTNQkIR	[K5](Biotin)	566.784	2	1	346	1	IYRMTNQkIRID	39.1	5.54	21361250	0	0	1	1	0	0	2	1	0	0	2.34431e+06	1.79797e+06	0	3	346	5.2722e+06	4.68862e+06	7	1
Atp6ap2	70495	21361250	NP_081715.1	renin receptor precursor [Mus musculus]	14	1	346	1	1	4	4	1	2	2	[R].MTNQKIRID.[-]	MTNQkIRID	[K5](Biotin)	672.843	2	1	346	2	IYRMTNQkIRID	39.1	5.54	21361250	0	0	0	1	0	0	0	1	0	0	0	1.67626e+06	0	1	346	5.2722e+06	4.68862e+06	7	1
Atp6ap2	70495	21361250	NP_081715.1	renin receptor precursor [Mus musculus]	14	1	346	2	3	4	4	1	2	2	[R].MTNQKIR.[I]	MTNQkIR	[K5](Biotin)	566.784	2	1	346	1	IYRMTNQkIRID	39.1	5.54	21361250	0	0	1	1	0	0	2	1	0	0	2.34431e+06	1.79797e+06	0	3	346	5.2722e+06	4.68862e+06	7	1
Lemd3	380664	145864461	NP_001074662.2	inner nuclear membrane protein Man1 [Mus musculus]	42	9	281; 296; 370; 446; 453; 695; 763; 770; X	1	1	23	26	1	12	12	[K].KLAPLLSPPSPDGDSTLESPTGPLLK.[T]	kLAPLLSPPSPDGDSTLESPTGPLLK	[K1](Biotin)	952.839	3	1	370	1	RYRAGAKkLAPLLSP	100.1	7.55	145864461	0	0	1	0	0	0	1	0	0	0	144174	0	0	1	281; 296; 370; 446; 453; 695; 763; 770	8.42385e+06	1.39629e+07	17	8
Lemd3	380664	145864461	NP_001074662.2	inner nuclear membrane protein Man1 [Mus musculus]	42	9	281; 296; 370; 446; 453; 695; 763; 770; X	1	1	23	26	1	12	12	[K].TAYGKPKLCEPEEELLQQFK.[R]	TAYGKPkLCEPEEELLQQFK	[K7](Biotin)	878.77	3	1	453	1	KTAYGKPkLCEPEEE	100.1	7.55	145864461	0	0	1	0	0	0	1	0	0	0	177418	0	0	1	281; 296; 370; 446; 453; 695; 763; 770	8.42385e+06	1.39629e+07	17	8
Lemd3	380664	145864461	NP_001074662.2	inner nuclear membrane protein Man1 [Mus musculus]	42	9	281; 296; 370; 446; 453; 695; 763; 770; X	3	3	23	26	1	12	12	[K].TLVIPSKVWQGQAFHLDRR.[N]	TLVIPSkVWQGQAFHLDRR	[K7](Biotin)	620.088	4	1	770	2	KTLVIPSkVWQGQAF	100.1	7.55	145864461	0	0	1	1	0	0	2	1	0	0	4477415	827634	0	3	281; 296; 370; 446; 453; 695; 763; 770	8.42385e+06	1.39629e+07	17	8
Lemd3	380664	145864461	NP_001074662.2	inner nuclear membrane protein Man1 [Mus musculus]	42	9	281; 296; 370; 446; 453; 695; 763; 770; X	2	2	23	26	1	12	12	[R].WIQPSASCDKTLVIPSK.[V]	WIQPSASCDkTLVIPSK	[K10](Biotin)	719.368	3	1	763	1	QPSASCDkTLVIPSK	100.1	7.55	145864461	0	0	1	1	0	0	1	1	0	0	534011	0	0	2	281; 296; 370; 446; 453; 695; 763; 770	8.42385e+06	1.39629e+07	17	8
Lemd3	380664	145864461	NP_001074662.2	inner nuclear membrane protein Man1 [Mus musculus]	42	9	281; 296; 370; 446; 453; 695; 763; 770; X	1	1	23	26	1	12	12	[R].SHSKPFSALTAK.[S]	SHSkPFSALTAK	[K4](Biotin)	500.594	3	1	296	0	RPRRSHSkPFSALTA	100.1	7.55	145864461	0	0	1	0	0	0	1	0	0	0	291165	0	0	1	281; 296; 370; 446; 453; 695; 763; 770	8.42385e+06	1.39629e+07	17	8
Lemd3	380664	145864461	NP_001074662.2	inner nuclear membrane protein Man1 [Mus musculus]	42	9	281; 296; 370; 446; 453; 695; 763; 770; X	2	2	23	26	1	12	12	[R].RSHSKPFSALTAK.[S]	RSHSkPFSALTAK	[K5](Biotin)	552.626	3	1	296	1	RPRRSHSkPFSALTA	100.1	7.55	145864461	0	0	1	0	0	0	2	0	0	0	520883	0	0	2	281; 296; 370; 446; 453; 695; 763; 770	8.42385e+06	1.39629e+07	17	8
Lemd3	380664	145864461	NP_001074662.2	inner nuclear membrane protein Man1 [Mus musculus]	42	9	281; 296; 370; 446; 453; 695; 763; 770; X	4	4	23	26	1	12	12	[R].INHANHTGSNHTYLKTAYGKPK.[L]	INHANHTGSNHTYLkTAYGKPK	[K15](Biotin)	670.337	4	1	446	1	GSNHTYLkTAYGKPK	100.1	7.55	145864461	0	0	1	1	0	0	2	2	0	0	6575420	5.79079e+06	0	4	281; 296; 370; 446; 453; 695; 763; 770	8.42385e+06	1.39629e+07	17	8
Lemd3	380664	145864461	NP_001074662.2	inner nuclear membrane protein Man1 [Mus musculus]	42	9	281; 296; 370; 446; 453; 695; 763; 770; X	1	1	23	26	1	12	12	[R].SHNEACQETKDLQPYMPLPHVR.[D]	SHNEACQETkDLQPYMPLPHVR	[K10](Biotin)	719.838	4	1	695	1	NEACQETkDLQPYMP	100.1	7.55	145864461	0	0	0	1	0	0	0	1	0	0	0	697982	0	1	281; 296; 370; 446; 453; 695; 763; 770	8.42385e+06	1.39629e+07	17	8
Lemd3	380664	145864461	NP_001074662.2	inner nuclear membrane protein Man1 [Mus musculus]	42	9	281; 296; 370; 446; 453; 695; 763; 770; X	2	2	23	26	1	12	12	[R].QVLKDDSLAR.[H]	QVLkDDSLAR	[K4](Biotin)	685.859	2	1	281	1	APARQVLkDDSLARH	100.1	7.55	145864461	0	0	1	1	0	0	1	1	0	0	1242431	1.10744e+06	0	2	281; 296; 370; 446; 453; 695; 763; 770	8.42385e+06	1.39629e+07	17	8
Pgrmc2	70804	226442772	NP_081834.1	membrane-associated progesterone receptor component 2 [Mus musculus]	12	2	129; X	10	10	16	17	1	3	3	[K].GSKFYGPAGPYGIFAGR.[D]	GSkFYGPAGPYGIFAGR	[K3](Biotin)	985.985	2	1	129	1	FDVTKGSkFYGPAGP	23.3	5.15	226442772	0	0	1	1	0	0	4	6	0	0	7.5765e+06	8.5654e+06	0	10	129	8.5654e+06	7.5765e+06	10	1
Lbr	98386	568911330	XP_006497134.1	lamin-B receptor isoform X1 [Mus musculus]	35	6	64; 126; 133; 159; 200; 535	1	1	58	67	1	12	12	[K].LAHLKTIHTSTGK.[S]	LAHLkTIHTSTGK	[K5](Biotin)	408.977	4	1	535	1	DPKLAHLkTIHTSTG	71.4	9.36	568911330	0	0	1	0	0	0	1	0	0	0	410015	0	0	1	64; 126; 133; 159; 200; 535	1.67274e+08	1.25478e+08	84	6	126; 133; 159	45189.8	3.11043e+06	8
Lbr	98386	568911330	XP_006497134.1	lamin-B receptor isoform X1 [Mus musculus]	35	6	64; 126; 133; 159; 200; 535	1	16	58	67	1	12	12	[K].LTPLVLKPFGNSVSVYNGEPEHMEK.[N]	LTPLVLkPFGNSVSVYNGEPEHMEK	[K7](Biotin)	1004.51	3	1	133	0	KLTPLVLkPFGNSVS	71.4	9.36	568911330	1	0	1	1	2	0	5	9	1.00625e+06	0	3.44623e+07	50755306	2	14	64; 126; 133; 159; 200; 535	1.67274e+08	1.25478e+08	84	6	126; 133; 159	45189.8	3.11043e+06	8
Lbr	98386	568911330	XP_006497134.1	lamin-B receptor isoform X1 [Mus musculus]	35	6	64; 126; 133; 159; 200; 535	1	1	58	67	1	12	12	[R].KSGSISSSPSR.[R]	kSGSISSSPSR	[K1](Biotin)	659.824	2	1	64	1	LKSFKQRkSGSISSS	71.4	9.36	568911330	0	0	1	0	0	0	1	0	0	0	38813	0	0	1	64; 126; 133; 159; 200; 535	1.67274e+08	1.25478e+08	84	6	126; 133; 159	45189.8	3.11043e+06	8
Lbr	98386	568911330	XP_006497134.1	lamin-B receptor isoform X1 [Mus musculus]	35	6	64; 126; 133; 159; 200; 535	1	1	58	67	1	12	12	[K].EIESEEQNLVTKGPAPLGTFQVTTPQR.[K]	EIESEEQNLVTkGPAPLGTFQVTTPQR	[K12](Biotin)	1065.87	3	1	200	1	EEQNLVTkGPAPLGT	71.4	9.36	568911330	0	0	0	1	0	0	0	1	0	0	0	217561	0	1	64; 126; 133; 159; 200; 535	1.67274e+08	1.25478e+08	84	6	126; 133; 159	45189.8	3.11043e+06	8
Lbr	98386	568911330	XP_006497134.1	lamin-B receptor isoform X1 [Mus musculus]	35	6	64; 126; 133; 159; 200; 535	1	14	58	67	1	12	12	[R].EILQVKLTPLVLKPFGNSVSVYNGEPEHMEK.[N]	EILQVkLTPLVLkPFGNSVSVYNGEPEHMEK	[K6; K13](Biotin)	991.762	4	1	126; 133	1	RREILQVkLTPLVLK; KLTPLVLkPFGNSVS	71.4	9.36	568911330	0	0	2	0	0	0	1	0	0	0	60876.5	0	0	1	64; 126; 133; 159; 200; 535	1.67274e+08	1.25478e+08	84	6	126; 133; 159	45189.8	3.11043e+06	8
Lbr	98386	568911330	XP_006497134.1	lamin-B receptor isoform X1 [Mus musculus]	35	6	64; 126; 133; 159; 200; 535	1	5	58	67	1	12	12	[R].REILQVKLTPLVLKPFGNSVSVYNGEPEHMEK.[N]	REILQVkLTPLVLKPFGNSVSVYNGEPEHMEK	[K7](Biotin)	970.269	4	1	126	2	RREILQVkLTPLVLK	71.4	9.36	568911330	0	0	1	1	0	0	3	2	0	0	2.99816e+06	1.29662e+06	0	5	64; 126; 133; 159; 200; 535	1.67274e+08	1.25478e+08	84	6	126; 133; 159	45189.8	3.11043e+06	8
Lbr	98386	568911330	XP_006497134.1	lamin-B receptor isoform X1 [Mus musculus]	35	6	64; 126; 133; 159; 200; 535	11	14	58	67	1	12	12	[R].EILQVKLTPLVLKPFGNSVSVYNGEPEHMEK.[N]	EILQVkLTPLVLKPFGNSVSVYNGEPEHMEK	[K6](Biotin)	931.241	4	1	126	1	RREILQVkLTPLVLK	71.4	9.36	568911330	1	0	1	1	1	0	3	9	408537	0	12456099	2.28321e+07	1	12	64; 126; 133; 159; 200; 535	1.67274e+08	1.25478e+08	84	6	126; 133; 159	45189.8	3.11043e+06	8
Lbr	98386	568911330	XP_006497134.1	lamin-B receptor isoform X1 [Mus musculus]	35	6	64; 126; 133; 159; 200; 535	7	7	58	67	1	12	12	[K].AKEIESEEQNLVTKGPAPLGTFQVTTPQRK.[D]	AKEIESEEQNLVTkGPAPLGTFQVTTPQRK	[K14](Biotin)	881.465	4	1	200	3	EEQNLVTkGPAPLGT	71.4	9.36	568911330	0	0	1	1	0	0	4	3	0	0	7.91632e+06	5073920	0	7	64; 126; 133; 159; 200; 535	1.67274e+08	1.25478e+08	84	6	126; 133; 159	45189.8	3.11043e+06	8
Lbr	98386	568911330	XP_006497134.1	lamin-B receptor isoform X1 [Mus musculus]	35	6	64; 126; 133; 159; 200; 535	4	5	58	67	1	12	12	[R].REILQVKLTPLVLKPFGNSVSVYNGEPEHMEK.[N]	REILQVkLTPLVLKPFGNSVSVYNGEPEHMEK	[K7](Biotin)	970.269	4	1	126	2	RREILQVkLTPLVLK	71.4	9.36	568911330	0	0	1	1	0	0	3	2	0	0	2.99816e+06	1.29662e+06	0	5	64; 126; 133; 159; 200; 535	1.67274e+08	1.25478e+08	84	6	126; 133; 159	45189.8	3.11043e+06	8
Lbr	98386	568911330	XP_006497134.1	lamin-B receptor isoform X1 [Mus musculus]	35	6	64; 126; 133; 159; 200; 535	6	6	58	67	1	12	12	[K].NATPYKDKQER.[I]	NATPYKDkQER	[K8](Biotin)	788.383	2	1	159	2	NATPYKDkQERIILS	71.4	9.36	568911330	1	1	1	1	1	1	2	2	280861	45189.8	8.84835e+06	8.0017e+06	2	4	64; 126; 133; 159; 200; 535	1.67274e+08	1.25478e+08	84	6	126; 133; 159	45189.8	3.11043e+06	8
Lbr	98386	568911330	XP_006497134.1	lamin-B receptor isoform X1 [Mus musculus]	35	6	64; 126; 133; 159; 200; 535	15	16	58	67	1	12	12	[K].LTPLVLKPFGNSVSVYNGEPEHMEK.[N]	LTPLVLkPFGNSVSVYNGEPEHMEK	[K7](Biotin)	1004.51	3	1	133	0	KLTPLVLkPFGNSVS	71.4	9.36	568911330	1	0	1	1	2	0	5	9	1.00625e+06	0	3.44623e+07	50755306	2	14	64; 126; 133; 159; 200; 535	1.67274e+08	1.25478e+08	84	6	126; 133; 159	45189.8	3.11043e+06	8
Lbr	98386	568911330	XP_006497134.1	lamin-B receptor isoform X1 [Mus musculus]	35	6	64; 126; 133; 159; 200; 535	2	14	58	67	1	12	12	[R].EILQVKLTPLVLKPFGNSVSVYNGEPEHMEK.[N]	EILQVkLTPLVLKPFGNSVSVYNGEPEHMEK	[K6](Biotin)	931.241	4	1	126	1	RREILQVkLTPLVLK	71.4	9.36	568911330	1	0	1	1	1	0	3	9	408537	0	12456099	2.28321e+07	1	12	64; 126; 133; 159; 200; 535	1.67274e+08	1.25478e+08	84	6	126; 133; 159	45189.8	3.11043e+06	8
Lbr	98386	568911330	XP_006497134.1	lamin-B receptor isoform X1 [Mus musculus]	35	6	64; 126; 133; 159; 200; 535	7	7	58	67	1	12	12	[K].EIESEEQNLVTKGPAPLGTFQVTTPQRK.[D]	EIESEEQNLVTkGPAPLGTFQVTTPQRK	[K12](Biotin)	1108.57	3	1	200	2	EEQNLVTkGPAPLGT	71.4	9.36	568911330	0	0	1	1	0	0	3	4	0	0	8.37081e+06	4.21289e+06	0	7	64; 126; 133; 159; 200; 535	1.67274e+08	1.25478e+08	84	6	126; 133; 159	45189.8	3.11043e+06	8
Clint1	216705	568972933	XP_006532901.1	clathrin interactor 1 isoform X1 [Mus musculus]	41	1	6	1	1	1	5	1	4	4	[-].MLNMWKVR.[E]	MLNMWkVR	[K6](Biotin)	673.331	2	1	6	1	MLNMWkVRELVDK	69.7	6.65	568972933	0	0	1	0	0	0	1	0	0	0	26215.6	0	0	1	6	0	26215.6	1	1
Vamp1	22317	6678549	NP_033522.1	vesicle-associated membrane protein 1 isoform a [Mus musculus]	7	1	54	1	1	1	1	1	1	1	[R].VNVDKVLER.[D]	VNVDkVLER	[K5](Biotin)	649.353	2	1	54	1	IMRVNVDkVLERDQK	12.9	6.65	6678549	0	0	1	0	0	0	1	0	0	0	272849	0	0	1	54	0	272849	1	1
Syne2	319565	145699091	NP_001005510.2	nesprin-2 [Mus musculus]	509	2	6477; 6482	2	2	7	10	1	5	5	[K].HMEGDRTEAPVPTDASTPFKSDYVK.[L]	HMEGDRTEAPVPTDASTPFkSDYVK	[K20](Biotin)	751.852	4	1	6477	2	TDASTPFkSDYVKLL	782.2	5.33	145699091	0	0	1	1	0	0	1	1	0	0	2153960	1.39749e+06	0	2	6477; 6482	2.81071e+06	3.74038e+06	7	2
Syne2	319565	145699091	NP_001005510.2	nesprin-2 [Mus musculus]	509	2	6477; 6482	4	4	7	10	1	5	5	[K].HMEGDRTEAPVPTDASTPFKSDYVKLLLR.[Q]	HMEGDRTEAPVPTDASTPFKSDYVkLLLR	[K25](Biotin)	875.69	4	1	6482	3	PFKSDYVkLLLRQGT	782.2	5.33	145699091	0	0	1	1	0	0	2	2	0	0	1.58642e+06	745405	0	4	6477; 6482	2.81071e+06	3.74038e+06	7	2
Syne2	319565	145699091	NP_001005510.2	nesprin-2 [Mus musculus]	509	2	6477; 6482	1	1	7	10	1	5	5	[K].SDYVKLLLR.[Q]	SDYVkLLLR	[K5](Biotin)	666.871	2	1	6482	1	PFKSDYVkLLLRQGT	782.2	5.33	145699091	0	0	0	1	0	0	0	1	0	0	0	667820	0	1	6477; 6482	2.81071e+06	3.74038e+06	7	2
Hmgn3	94353	568962379	XP_006511654.1	high mobility group nucleosome-binding domain-containing protein 3 isoform X1 [Mus musculus]	19	1	120	1	1	1	1	1	1	1	[R].VKGTVDILHACSD.[-]	VkGTVDILHACSD	[K2](Biotin)	820.892	2	1	120	1	QIETVRVkGTVDILH	14	9.86	568962379	1	0	0	0	1	0	0	0	580829	0	0	0	1	0						120	0	580829	1
Syne1	64009	119120865	NP_001073154.1	nesprin-1 isoform 3 [Mus musculus]	187	4	9; 23; 2554; 2573	1	1	5	10	1	6	1	[-].MFPQELAQKIK.[G]	MFPQELAQkIK	[K9](Biotin)	800.915	2	1	9	1	FPQELAQkIKGYQEQ	344.3	5.24	119120865	0	0	1	0	0	0	1	0	0	0	338356	0	0	1	9; 23; 2554; 2573	401259	1.40323e+06	5	4
Wwox	80707	31980962	NP_062519.2	WW domain-containing oxidoreductase [Mus musculus]	18	1	28	2	2	10	10	1	3	3	[R].TTKDGWVYYANHTEEKTQWEHPKTGK.[R]	TTkDGWVYYANHTEEKTQWEHPKTGK	[K3](Biotin)	672.923	5	1	28	3	GWEERTTkDGWVYYA	46.5	7.02	31980962	0	0	1	1	0	0	1	1	0	0	549105	488712	0	2	28	4.36444e+06	7.90235e+06	7	1	28	62328	1.19464e+06	3
Wwox	80707	31980962	NP_062519.2	WW domain-containing oxidoreductase [Mus musculus]	18	1	28	4	4	10	10	1	3	3	[R].TTKDGWVYYANHTEEKTQWEHPK.[T]	TTkDGWVYYANHTEEKTQWEHPK	[K3](Biotin)	615.688	5	1	28	2	GWEERTTkDGWVYYA	46.5	7.02	31980962	1	0	1	1	1	0	2	1	503317	0	3.54621e+06	1.55083e+06	1	3	28	4.36444e+06	7.90235e+06	7	1	28	62328	1.19464e+06	3
Wwox	80707	31980962	NP_062519.2	WW domain-containing oxidoreductase [Mus musculus]	18	1	28	4	4	10	10	1	3	3	[R].TTKDGWVYYANHTEEK.[T]	TTkDGWVYYANHTEEK	[K3](Biotin)	723.333	3	1	28	1	GWEERTTkDGWVYYA	46.5	7.02	31980962	1	1	1	1	1	1	1	1	691319	62328	3.80703e+06	2.3249e+06	2	2	28	4.36444e+06	7.90235e+06	7	1	28	62328	1.19464e+06	3
Itpr3	16440	568999131	XP_006523775.1	inositol 1,4,5-trisphosphate receptor type 3 isoform X1 [Mus musculus]	163	1	1671	2	2	2	5	1	3	3	[R].SAANYKTATR.[T]	SAANYkTATR	[K6](Biotin)	654.822	2	1	1671	1	QRSAANYkTATRTFP	318.4	6.99	568999131	0	0	1	1	0	0	1	1	0	0	354585	258151	0	2	1671	258151	354585	2	1
Zc3hav1	78781	568943224	XP_006506842.1	zinc finger CCCH-type antiviral protein 1 isoform X1 [Mus musculus]	55	2	504; 556	2	2	3	3	1	2	2	[K].SAVTGGKEAVYSGVQSLR.[S]	SAVTGGkEAVYSGVQSLR	[K7](Biotin)	679.016	3	1	504	1	KSAVTGGkEAVYSGV	112.5	8.07	568943224	0	0	1	1	0	0	1	1	0	0	224299	74545.7	0	2	504; 556	74545.7	224299	3	2
Zc3hav1	78781	568943224	XP_006506842.1	zinc finger CCCH-type antiviral protein 1 isoform X1 [Mus musculus]	55	2	504; 556	1	1	3	3	1	2	2	[R].VAASGSPGKSSTHASVSPASEPSR.[M]	VAASGSPGkSSTHASVSPASEPSR	[K9](Biotin)	827.4	3	1	556	1	AASGSPGkSSTHASV	112.5	8.07	568943224	0	0	0	1	0	0	0	1	0	0	0	0	0	1	504; 556	74545.7	224299	3	2
Actn4	60595	11230802	NP_068695.1	alpha-actinin-4 [Mus musculus]	56	1	194	1	1	1	102	1	36	22	[K].NVNVQNFHISWKDGLAFNALIHR.[H]	NVNVQNFHISWkDGLAFNALIHR	[K12](Biotin)	730.627	4	1	194	1	QNFHISWkDGLAFNA	104.9	5.41	11230802	1	0	0	0	1	0	0	0	76400.7	0	0	0	1	0						194	0	76400.7	1
Ssfa2	70599	194473671	NP_542125.3	sperm-specific antigen 2 homolog [Mus musculus]	56	2	300; 580	1	1	3	3	1	2	2	[K].TLSKLNLCVDKTEKGEGGSSPATEK.[G]	TLSkLNLCVDKTEKGEGGSSPATEK	[K4](Biotin)	719.609	4	1	300	3	RLMKTLSkLNLCVDK	136.9	5.26	194473671	0	0	1	0	0	0	1	0	0	0	275282	0	0	1	300; 580	1.32813e+06	2.48694e+06	3	2
Ssfa2	70599	194473671	NP_542125.3	sperm-specific antigen 2 homolog [Mus musculus]	56	2	300; 580	2	2	3	3	1	2	2	[R].AKVEIVAEKR.[K]	AkVEIVAEKR	[K2](Biotin)	456.927	3	1	580	2	PLQKGRAkVEIVAEK	136.9	5.26	194473671	0	0	1	1	0	0	1	1	0	0	2.21166e+06	1.32813e+06	0	2	300; 580	1.32813e+06	2.48694e+06	3	2
Mccc1	72039	186700620	NP_076133.3	methylcrotonoyl-CoA carboxylase subunit alpha, mitochondrial [Mus musculus]	44	1	677	4	11	15	15	1	3	3	[K].AGDSLMVMIAMKMEHTIKAPK.[D]	AGDSLMVMIAMkMEHTIKAPK	[K12](Biotin)	636.819	4	1	677	2	LMVMIAMkMEHTIKA	79.3	7.83	186700620	1	0	1	1	3	0	6	2	641916	0	1.24057e+06	1.23933e+06	3	8	677	2.56761e+06	2.91899e+06	18	1	677	0	1922252	8
Mccc1	72039	186700620	NP_076133.3	methylcrotonoyl-CoA carboxylase subunit alpha, mitochondrial [Mus musculus]	44	1	677	7	11	15	15	1	3	3	[K].AGDSLMVMIAMKMEHTIKAPK.[D]	AGDSLMVMIAMkMEHTIKAPK	[K12](Biotin)	636.819	4	1	677	2	LMVMIAMkMEHTIKA	79.3	7.83	186700620	1	0	1	1	3	0	6	2	641916	0	1.24057e+06	1.23933e+06	3	8	677	2.56761e+06	2.91899e+06	18	1	677	0	1922252	8
Mccc1	72039	186700620	NP_076133.3	methylcrotonoyl-CoA carboxylase subunit alpha, mitochondrial [Mus musculus]	44	1	677	2	2	15	15	1	3	3	[K].AGDSLMVMIAMKMEHTIKAPKDGR.[I]	AGDSLMVMIAMkMEHTIKAPKDGR	[K12](Biotin)	572.088	5	1	677	3	LMVMIAMkMEHTIKA	79.3	7.83	186700620	1	0	0	1	1	0	0	1	132869	0	0	88937.1	1	1	677	2.56761e+06	2.91899e+06	18	1	677	0	1922252	8
Mccc1	72039	186700620	NP_076133.3	methylcrotonoyl-CoA carboxylase subunit alpha, mitochondrial [Mus musculus]	44	1	677	2	2	15	15	1	3	3	[K].AGDSLMVMIAMKMEHTIK.[A]	AGDSLMVMIAMkMEHTIK	[K12](Biotin)	744.696	3	1	677	1	LMVMIAMkMEHTIKA	79.3	7.83	186700620	1	0	1	0	1	0	1	0	505551	0	437853	0	1	1	677	2.56761e+06	2.91899e+06	18	1	677	0	1922252	8
Zfp516	329003	569005379	XP_006526562.1	zinc finger protein 516 isoform X1 [Mus musculus]	72	3	138; 1051; 1056	4	4	6	8	1	5	5	[K].TYIPKDFATLYQGWGVSSPGPEHR.[G]	TYIPkDFATLYQGWGVSSPGPEHR	[K5](Biotin)	978.144	3	1	1056	1	IFKTYIPkDFATLYQ	124.7	8.51	569005379	1	1	0	0	3	1	0	0	1.05102e+06	56437.9	0	0	4	0						138; 1051; 1056	56437.9	1.46927e+06	6
Zfp516	329003	569005379	XP_006526562.1	zinc finger protein 516 isoform X1 [Mus musculus]	72	3	138; 1051; 1056	1	1	6	8	1	5	5	[R].VLNGAVPMDGSKILLR.[S]	VLNGAVPMDGSkILLR	[K12](Biotin)	637.017	3	1	138	1	AVPMDGSkILLRSSR	124.7	8.51	569005379	1	0	0	0	1	0	0	0	67503.6	0	0	0	1	0						138; 1051; 1056	56437.9	1.46927e+06	6
Zfp516	329003	569005379	XP_006526562.1	zinc finger protein 516 isoform X1 [Mus musculus]	72	3	138; 1051; 1056	1	1	6	8	1	5	5	[K].RLDILSIFKTYIPK.[D]	RLDILSIFkTYIPK	[K9](Biotin)	645.038	3	1	1051	2	LDILSIFkTYIPKDF	124.7	8.51	569005379	1	0	0	0	1	0	0	0	350749	0	0	0	1	0						138; 1051; 1056	56437.9	1.46927e+06	6
Urb1	207932	256818750	NP_083773.1	nucleolar pre-ribosomal-associated protein 1 [Mus musculus]	134	1	1582	2	2	2	14	1	6	6	[R].SLGKSLWQQPSVGDILR.[L]	SLGkSLWQQPSVGDILR	[K4](Biotin)	704.042	3	1	1582	1	KTCRSLGkSLWQQPS	254.7	6.96	256818750	1	1	0	0	1	1	0	0	198234	25737.2	0	0	2	0						1582	25737.2	198234	2
Ahctf1	226747	568910764	XP_006496863.1	protein ELYS isoform X1 [Mus musculus]	128	10	1328; 1337; 1352; 1382; 1745; 1771; 2078; 2267; 2307; X	1	1	31	48	1	24	24	[K].TSDKNTYFPLDVPAKGPQKVVAESLATHSGR.[L]	TSDkNTYFPLDVPAKGPQKVVAESLATHSGR	[K4](Biotin)	708.766	5	1	1352	3	EWMKTSDkNTYFPLD	254.6	6.65	568910764	0	0	1	0	0	0	1	0	0	0	624637	0	0	1	1328; 1337; 1352; 1382; 1745; 1771; 2078; 2267; 2307	6.89906e+06	8.78919e+06	18	9
Ahctf1	226747	568910764	XP_006496863.1	protein ELYS isoform X1 [Mus musculus]	128	10	1328; 1337; 1352; 1382; 1745; 1771; 2078; 2267; 2307; X	1	1	31	48	1	24	24	[K].VVAESLATHSGRLEKLDVSKEDSTASTR.[S]	VVAESLATHSGRLEkLDVSKEDSTASTR	[K15](Biotin)	803.912	4	1	1382	3	THSGRLEkLDVSKED	254.6	6.65	568910764	0	0	0	1	0	0	0	1	0	0	0	170080	0	1	1328; 1337; 1352; 1382; 1745; 1771; 2078; 2267; 2307	6.89906e+06	8.78919e+06	18	9
Ahctf1	226747	568910764	XP_006496863.1	protein ELYS isoform X1 [Mus musculus]	128	10	1328; 1337; 1352; 1382; 1745; 1771; 2078; 2267; 2307; X	1	1	31	48	1	24	24	[R].NTKAFVSTSFHK.[C]	NTkAFVSTSFHK	[K3](Biotin)	531.601	3	1	1328	1	ATDDRNTkAFVSTSF	254.6	6.65	568910764	0	0	0	1	0	0	0	1	0	0	0	114728	0	1	1328; 1337; 1352; 1382; 1745; 1771; 2078; 2267; 2307	6.89906e+06	8.78919e+06	18	9
Ahctf1	226747	568910764	XP_006496863.1	protein ELYS isoform X1 [Mus musculus]	128	10	1328; 1337; 1352; 1382; 1745; 1771; 2078; 2267; 2307; X	2	2	31	48	1	24	24	[R].NVSTLEKSVLVPNKEAALVVTSK.[R]	NVSTLEkSVLVPNKEAALVVTSK	[K7](Biotin)	884.828	3	1	2078	2	RNVSTLEkSVLVPNK	254.6	6.65	568910764	0	0	1	1	0	0	1	1	0	0	341951	294286	0	2	1328; 1337; 1352; 1382; 1745; 1771; 2078; 2267; 2307	6.89906e+06	8.78919e+06	18	9
Ahctf1	226747	568910764	XP_006496863.1	protein ELYS isoform X1 [Mus musculus]	128	10	1328; 1337; 1352; 1382; 1745; 1771; 2078; 2267; 2307; X	1	3	31	48	1	24	24	[K].AFVSTSFHKCGLPAETEWMK.[T]	AFVSTSFHkCGLPAETEWMK	[K9](Biotin)	856.73	3	1	1337	1	FVSTSFHkCGLPAET	254.6	6.65	568910764	0	0	1	1	0	0	2	1	0	0	2.4541e+06	1.86108e+06	0	3	1328; 1337; 1352; 1382; 1745; 1771; 2078; 2267; 2307	6.89906e+06	8.78919e+06	18	9
Ahctf1	226747	568910764	XP_006496863.1	protein ELYS isoform X1 [Mus musculus]	128	10	1328; 1337; 1352; 1382; 1745; 1771; 2078; 2267; 2307; X	2	2	31	48	1	24	24	[R].ATDDRNTKAFVSTSFHK.[C]	ATDDRNTkAFVSTSFHK	[K8](Biotin)	717.683	3	1	1328	2	ATDDRNTkAFVSTSF	254.6	6.65	568910764	0	0	1	1	0	0	1	1	0	0	570367	537927	0	2	1328; 1337; 1352; 1382; 1745; 1771; 2078; 2267; 2307	6.89906e+06	8.78919e+06	18	9
Ahctf1	226747	568910764	XP_006496863.1	protein ELYS isoform X1 [Mus musculus]	128	10	1328; 1337; 1352; 1382; 1745; 1771; 2078; 2267; 2307; X	2	3	31	48	1	24	24	[K].AFVSTSFHKCGLPAETEWMK.[T]	AFVSTSFHkCGLPAETEWMK	[K9](Biotin)	856.73	3	1	1337	1	FVSTSFHkCGLPAET	254.6	6.65	568910764	0	0	1	1	0	0	2	1	0	0	2.4541e+06	1.86108e+06	0	3	1328; 1337; 1352; 1382; 1745; 1771; 2078; 2267; 2307	6.89906e+06	8.78919e+06	18	9
Ahctf1	226747	568910764	XP_006496863.1	protein ELYS isoform X1 [Mus musculus]	128	10	1328; 1337; 1352; 1382; 1745; 1771; 2078; 2267; 2307; X	1	1	31	48	1	24	24	[R].KKPSSFPKQILR.[R]	KKPSSFPkQILR	[K8](Biotin)	552.318	3	1	2307	2	KKPSSFPkQILRRKM	254.6	6.65	568910764	0	0	0	1	0	0	0	1	0	0	0	394934	0	1	1328; 1337; 1352; 1382; 1745; 1771; 2078; 2267; 2307	6.89906e+06	8.78919e+06	18	9
Ahctf1	226747	568910764	XP_006496863.1	protein ELYS isoform X1 [Mus musculus]	128	10	1328; 1337; 1352; 1382; 1745; 1771; 2078; 2267; 2307; X	2	2	31	48	1	24	24	[R].SKEATPVAAGEAGDEDGAVIVSKAAHSSR.[L]	SKEATPVAAGEAGDEDGAVIVSkAAHSSR	[K23](Biotin)	759.873	4	1	1771	2	DGAVIVSkAAHSSRL	254.6	6.65	568910764	0	0	1	1	0	0	1	1	0	0	2.21608e+06	1664941	0	2	1328; 1337; 1352; 1382; 1745; 1771; 2078; 2267; 2307	6.89906e+06	8.78919e+06	18	9
[truncated: 699 more rows]
[truncated: 1 more columns]

## Sheet: Ambiguous Peptides
Gene symbol	Gene ID	Database ID	RefSeq Accession	Protein Description	# Lysines	# Biotin Sites	Biotin Sites	# Protein Groups	Annotated Sequence	Peptide Sequence	Peptide Modifications	m/z [Da]	Charge	Protein Positions	# Missed Cleavages	Peptide Window	Master Protein Accessions	m6A-tracer-BioID alone_REP1.raw - #Biotin sites	m6A-tracer-BioID alone_REP2.raw - #Biotin sites	LAP2 BioID_REP1.raw - #Biotin sites	LAP2 BioID_REP2.raw - #Biotin sites	m6A-tracer-BioID alone_REP1.raw - #PSMs	m6A-tracer-BioID alone_REP2.raw - #PSMs	LAP2 BioID_REP1.raw - #PSMs	LAP2 BioID_REP2.raw - #PSMs	m6A-tracer-BioID alone_REP1.raw - Abundance	m6A-tracer-BioID alone_REP2.raw - Abundance	LAP2 BioID_REP1.raw - Abundance	LAP2 BioID_REP2.raw - Abundance	m6A-tracer-BioID alone - #PSMs	LAP2 BioID - #PSMs	LAP2 BioID - #Biotin sites
[truncated: 214 more rows]

[truncated: 2 more sheets: Degree of biotinyltion, Transmembrane domain analysis]
