# Supplementary material for: Mapping the micro-proteome of the nuclear lamina and lamina-associated domains
Source: Life Sci Alliance. 2021 Mar 23;4(5):e202000774. doi: 10.26508/lsa.202000774 (PMC8008952; doi:10.26508/lsa.202000774)
Supplement: Supplementary file 2 [file LSA-2020-00774_TableS2.xlsx]

## Sheet: Proteins above threshold
Gene symbol	Protein Description	Abundance Ratio: (plus) / (minus) - Log2(Median ratio)	Additional Notes
Wbp11	WW domain-binding protein 11	6.64386
Zmym3	zinc finger MYM-type protein 3	6.64386
Kifc1	kinesin-like protein KIFC1	6.64386
Sgol1	shugoshin-like 1	6.64386
Sox9	transcription factor SOX-9	6.64386
Smtn	smoothelin	6.64386
Ahdc1	AT-hook DNA-binding motif-containing protein 1	6.64386
Cfdp1	craniofacial development protein 1	6.64386
Kif20a	kinesin-like protein KIF20A	5.72829
Sun1	SUN domain-containing protein 1	5.70605
Lrif1	ligand-dependent nuclear receptor-interacting factor 1	5.6688
Zfp280d	zinc finger protein 280D	5.66854
Pinx1	PIN2/TERF1-interacting telomerase inhibitor 1	5.66663
Rbm22	pre-mRNA-splicing factor RBM22	5.66084
Mccc1	methylcrotonoyl-CoA carboxylase subunit alpha, mitochondrial	5.64749	Mitochondrial, endogenously biotinylated
B230219D22Rik	UPF0461 protein C5orf24 homolog	5.64576
Ccdc71l	coiled-coil domain-containing protein 71L	4.33478
Tsr1	pre-rRNA-processing protein TSR1 homolog	4.11836
Fam207a	protein FAM207A	4.0197
Lbr	lamin-B receptor	4.00558
Cbx8	chromobox protein homolog 8	3.9381
Nusap1	nucleolar and spindle-associated protein 1	3.91169
Eme1	crossover junction endonuclease EME1	3.81486
Aurkb	aurora kinase B	3.68151
Sgol2a	shugoshin-like 2	3.56523
Adnp2	ADNP homeobox protein 2	3.50144
Zfp652	zinc finger protein 652	3.42371
Ehmt2	histone-lysine N-methyltransferase EHMT2	3.33814
Pds5a	sister chromatid cohesion protein PDS5 homolog A	3.334
Mafg	transcription factor MafG	3.30976
Kif20b	kinesin-like protein KIF20B	3.23955
Dek	protein DEK	3.13258
LOC100044068	interferon-activable protein 202-like	2.87912
Nepro	uncharacterized protein C3orf17 homolog	2.87086
Khdrbs1	KH domain-containing, RNA-binding, signal transduction-associated protein 1	2.82609
Srfbp1	serum response factor-binding protein 1	2.7703
Ebna1bp2	probable rRNA-processing protein EBP2	2.58785
Senp1	sentrin-specific protease 1	2.35445
Ddx3x	ATP-dependent RNA helicase DDX3X	2.23419
Rbm25	RNA-binding protein 25	2.06419
Cdca8	borealin	2.05658
Lxn	latexin	2.05311
Mcm4	DNA replication licensing factor MCM4	1.94073
Tead4	transcriptional enhancer factor TEF-3	1.93357
Esco2	N-acetyltransferase ESCO2	1.86433
Incenp	inner centromere protein	1.78325
Tpx2	targeting protein for Xklp2	1.68572
Cbx1	chromobox protein homolog 1	1.61871
Cdk11b	cyclin-dependent kinase 11B	1.53157
Smchd1	structural maintenance of chromosomes flexible hinge domain-containing protein 1	1.52406
Atrx	transcriptional regulator ATRX	1.52381
Prr14	proline-rich protein 14	1.48543
Cdyl	chromodomain Y-like protein	1.41954
Rcc2	protein RCC2	1.41792
Trim28	transcription intermediary factor 1-beta	1.41522
Ahctf1	protein ELYS	1.39835
Lmnb2	lamin-B2	1.37351
Tmpo	lamina-associated polypeptide 2	1.30801
Cbx5	chromobox protein homolog 5	1.25912
S100a6	protein S100-A6	1.21599
Mki67	antigen KI-67	1.20945
Hmgn2	non-histone chromosomal protein HMG-17	1.20883
Cdca5	sororin	1.20727
Nup98	nuclear pore complex protein Nup98-Nup96	1.18301
Gtf2f2	general transcription factor IIF subunit 2	1.17951
Hnrnpr	heterogeneous nuclear ribonucleoprotein R	1.14209
Syncrip	heterogeneous nuclear ribonucleoprotein Q	1.14209
Zfp280c	zinc finger protein 280C	1.14111
Hmg20a	high mobility group protein 20A	1.13291
A430005L14Rik	UPF0688 protein C1orf174 homolog	1.12334
Ctdspl2	CTD small phosphatase-like protein 2	1.02857
Senp7	sentrin-specific protease 7	1.02503
Zfp512	zinc finger protein 512	1.02219
Sarnp	SAP domain-containing ribonucleoprotein	1.01293
Hmga1	high mobility group protein HMG-I/HMG-Y	1.00863
Hmgn1	non-histone chromosomal protein HMG-14	0.987685
Nop16	nucleolar protein 16	0.974529
Mecp2	methyl-CpG-binding protein 2	0.974529
Hdgfrp2	hepatoma-derived growth factor-related protein 2	0.967906
Gpkow	G patch domain and KOW motifs-containing protein	0.960141
Cbx3	chromobox protein homolog 3	0.957915
Kif4	chromosome-associated kinesin KIF4	0.946357
Suz12	polycomb protein Suz12	0.942984
Cdca7	cell division cycle-associated protein 7	0.941858
Anln	actin-binding protein anillin	0.930548
Cdca2	cell division cycle-associated protein 2	0.92448
Kif18b	kinesin-like protein KIF18B	0.910733
Rrp1b	ribosomal RNA processing protein 1 homolog B	0.896853
Orc2	origin recognition complex subunit 2	0.895303
Top2a	DNA topoisomerase 2-alpha	0.892974
Zfp871	zinc finger protein 871	0.892974
Ddx21	nucleolar RNA helicase 2	0.886745
Wiz	protein Wiz	0.88049
Zmat2	zinc finger matrin-type protein 2	0.88049
Baz1b	tyrosine-protein kinase BAZ1B	0.870266
H2afx	histone H2AX	0.851599
Emd	emerin	0.849599
Champ1	chromosome alignment-maintaining phosphoprotein 1	0.848798
Usp7	ubiquitin carboxyl-terminal hydrolase 7	0.836732
Pabpn1	polyadenylate-binding protein 2	0.830255
Fnbp1l	formin-binding protein 1-like	0.830255
Orc3	origin recognition complex subunit 3	0.824564
Lmna	prelamin-A/C	0.820894
Hist1h1b	histone H1.5	0.813114
C1d	nuclear nucleic acid-binding protein C1D	0.809826
Rif1	telomere-associated protein RIF1	0.798258
Numa1	nuclear mitotic apparatus protein 1	0.787432
Gnl2	nucleolar GTP-binding protein 2	0.787432
2310036O22Rik	uncharacterized protein C19orf43 homolog	0.78576
Krcc1	lysine-rich coiled-coil protein 1	0.782409
Hist1h1e	histone H1.4	0.754888
Lmnb1	lamin-B1	0.746743
Whsc1l1	histone-lysine N-methyltransferase NSD3	0.746743

## Sheet: Protein level view
Gene symbol	Gene ID	Database ID	RefSeq Accession	Protein Description	# Lysines	MW [kDa]	calc. pI	Abundance Ratio: (plus) / (minus) - Log2(Median ratio)	m6A-tracer-BioID w/ DAM-LMNB1 Shield(+) - #Biotin sites	m6A-tracer-BioID w/ DAM-LMNB1 Shield(-) - #Biotin sites	m6A-tracer-BioID w/ DAM-LMNB1 Shield(+) - Biotin sites	m6A-tracer-BioID w/ DAM-LMNB1 Shield(-) - Biotin sites	m6A-tracer-BioID w/ DAM-LMNB1 Shield(+) - Total #PSMs	m6A-tracer-BioID w/ DAM-LMNB1 Shield(-) - Total #PSMs	# Biotin Sites Total for Experiment	Biotin Sites Total for Experiment
Wbp11	60321	267844920	NP_068360.4	WW domain-binding protein 11	47	69.8	8.4	6.64386	1	1	218	218	2	3	1	218
Zmym3	56364	569010395	XP_006528223.1	zinc finger MYM-type protein 3	81	157.3	6.34	6.64386	1	1	690	690	1	1	1	690
Kifc1	100502766	305678350	NP_001182227.1	kinesin-like protein KIFC1	30	74.1	8.72	6.64386	2	2	14; 130	14; 130	3	2	2	14; 130
Sgol1	72415	13386294	NP_082508.1	shugoshin-like 1	51	58.9	9.58	6.64386	2		192; 432		3		2	192; 432
Sox9	20682	165932321	NP_035578.3	transcription factor SOX-9	25	56	6.81	6.64386	1		82		1		1	82
Smtn	29856	568970300	XP_006514787.1	smoothelin	40	103.3	9.1	6.64386	1		62		1		1	62
Ahdc1	230793	568930972	XP_006538800.1	AT-hook DNA-binding motif-containing protein 1	72	168	8.97	6.64386	1		942		1		1	942
Cfdp1	23837	6753412	NP_035931.1	craniofacial development protein 1	37	32.9	4.86	6.64386	1		163		1		1	163
Kif20a	19348	6679597	NP_033030.1	kinesin-like protein KIF20A	66	99.8	6.99	5.72829	2	1	107; X	107	4	1	2	107; X
Sun1	77053	568938833	XP_006504821.1	SUN domain-containing protein 1	43	105.2	7.05	5.70605	2		140; 175		3		2	140; 175
Lrif1	321000	87162474	NP_001034577.1	ligand-dependent nuclear receptor-interacting factor 1	71	82.9	9.5	5.6688	2	1	307; 461	461	4	1	2	307; 461
Zfp280d	235469	84452159	NP_666336.3	zinc finger protein 280D	75	107.8	6.84	5.66854	2		138; 571		3		2	138; 571
Pinx1	72400	18129616	NP_082504.1	PIN2/TERF1-interacting telomerase inhibitor 1	53	37.2	9.63	5.66663	1	1	X	X	7	3	1	X
Rbm22	66810	110625591	NP_080052.1	pre-mRNA-splicing factor RBM22	29	46.9	8.54	5.66084	2	1	139; 149	149	3	2	2	139; 149
Mccc1	72039	186700620	NP_076133.3	methylcrotonoyl-CoA carboxylase subunit alpha, mitochondrial	44	79.3	7.83	5.64749	2		677; X		14		2	677; X
B230219D22Rik	78521	31044487	NP_851795.1	UPF0461 protein C5orf24 homolog	16	20.1	9.92	5.64576	3	1	17; 49; X	X	4	1	3	17; 49; X
Ccdc71l	72123	242332520	NP_001156375.1	coiled-coil domain-containing protein 71L	5	24.2	11.52	4.33478	1		91		2		1	91
Tsr1	104662	126506294	NP_796299.2	pre-rRNA-processing protein TSR1 homolog	60	92	6.99	4.11836	1		38		1		1	38
Fam207a	108707	568966270	XP_006513096.1	protein FAM207A	16	24.8	11	4.0197	1		106		1		1	106
Lbr	98386	568911330	XP_006497134.1	lamin-B receptor	35	71.4	9.36	4.00558	4	3	126; 133; 200; X	133; 200; X	30	20	4	126; 133; 200; X
Cbx8	30951	7304947	NP_038954.1	chromobox protein homolog 8	28	39.8	9.94	3.9381	1	1	200	200	1	1	1	200
Nusap1	108907	19527068	NP_598612.1	nucleolar and spindle-associated protein 1	55	48.5	9.89	3.91169	1		326		2		1	326
Eme1	268465	568974144	XP_006533471.1	crossover junction endonuclease EME1	39	65.4	8.76	3.81486	1	1	103	103	2	1	1	103
Aurkb	20877	51317394	NP_035626.1	aurora kinase B	26	39.4	9.44	3.68151	3	1	15; 56; 61	15	5	2	3	15; 56; 61
Sgol2a	68549	51092285	NP_950172.1	shugoshin-like 2	130	130.2	8.76	3.56523	1	1	508	508	6	4	1	508
Adnp2	240442	569005305	XP_006526528.1	ADNP homeobox protein 2	74	140.9	9.38	3.50144	1		396		1		1	396
Zfp652	268469	124378028	NP_963903.2	zinc finger protein 652	57	69.4	8.75	3.42371		1		49		1	1	49
Ehmt2	110147	755568520	XP_011249656.1	histone-lysine N-methyltransferase EHMT2	54	138.9	5.8	3.33814	1		233		2		1	233
Pds5a	71521	568934559	XP_006504178.1	sister chromatid cohesion protein PDS5 homolog A	112	150.2	7.85	3.334	1		7		1		1	7
Mafg	17134	6754610	NP_034886.1	transcription factor MafG	17	17.9	10.04	3.30976	3	1	12; 144; X	12	4	1	3	12; 144; X
Kif20b	240641	569007257	XP_006527143.1	kinesin-like protein KIF20B	180	203.4	5.78	3.23955		1		800		1	1	800
Dek	110052	253795498	NP_080176.2	protein DEK	68	43.1	6.86	3.13258	1		372		2		1	372
LOC100044068	100044068	309261908	XP_001473923.2	interferon-activable protein 202-like	51	50.4	8.35	2.87912	2	1	340; 373	373	3	2	2	340; 373
Nepro	212547	22122411	NP_666084.1	uncharacterized protein C3orf17 homolog	52	63.4	9.94	2.87086		1		517		1	1	517
Khdrbs1	20218	110626031	NP_035447.3	KH domain-containing, RNA-binding, signal transduction-associated protein 1	25	48.3	8.72	2.82609	1	2	432	21; 432	3	3	2	21; 432
Srfbp1	67222	148540184	NP_080316.3	serum response factor-binding protein 1	52	48.7	9.54	2.7703	2	1	351; X	X	5	4	2	351; X
Ebna1bp2	69072	21312728	NP_081208.1	probable rRNA-processing protein EBP2	45	34.7	10.08	2.58785	2	2	33; 209	33; 209	4	4	2	33; 209
Senp1	223870	568992265	XP_006520943.1	sentrin-specific protease 1	46	78.8	8.69	2.35445	1		450		3		1	450
Ddx3x	13205	6753620	NP_034158.1	ATP-dependent RNA helicase DDX3X	32	73.1	7.18	2.23419	2	2	81; X	81; X	3	5	2	81; X
Rbm25	67039	568980261	XP_006516228.1	RNA-binding protein 25	88	101.7	6.51	2.06419	1		279		1		1	279
Cdca8	52276	227116268	NP_080836.3	borealin	28	32.2	10.13	2.05658	1	1	207	207	2	1	1	207
Lxn	17035	31980632	NP_058033.2	latexin	14	25.5	5.74	2.05311	1	1	42	42	2	1	1	42
Mcm4	17217	255918149	NP_032591.3	DNA replication licensing factor MCM4	45	96.7	7.2	1.94073	1		857		1		1	857
Tead4	21679	148352315	NP_035697.3	transcriptional enhancer factor TEF-3	27	48	8.06	1.93357	1	1	140	140	10	8	1	140
Esco2	71988	170932558	NP_082315.3	N-acetyltransferase ESCO2	66	67.2	9.48	1.86433	3	1	31; 271; 351	31	4	2	3	31; 271; 351
Incenp	16319	755562819	XP_006526770.2	inner centromere protein	85	101.9	9.51	1.78325	9	5	111; 210; 279; 304; 482; 499; 513; 763; 878	279; 304; 499; 763; 878	26	10	9	111; 210; 279; 304; 482; 499; 513; 763; 878
Tpx2	72119	568918482	XP_006500277.1	targeting protein for Xklp2	97	85.8	9.38	1.68572	28	14	58; 65; 75; 233; 239; 258; 307; 358; 362; 375; 396; 420; 425; 485; 492; 506; 523; 564; 566; 598; 603; 625; 684; 708; 719; 726; 739; X	75; 239; 258; 375; 485; 492; 506; 523; 566; 684; 708; 726; 739; X	111	55	28	58; 65; 75; 233; 239; 258; 307; 358; 362; 375; 396; 420; 425; 485; 492; 506; 523; 564; 566; 598; 603; 625; 684; 708; 719; 726; 739; X
Cbx1	12412	755537223	XP_011247003.1	chromobox protein homolog 1	28	22.4	4.93	1.61871	1		33		1		1	33
m6A-Tracer-BioID	N/A	N/A	N/A	Bait	57	80.5	6.65	1.56389	29	17	4; 183; 194; 278; 288; 294; 318; 387; 393; 452; 462; 470; 499; 517; 540; 546; 556; 563; 609; 615; 631; 634; 637; 644; 681; 686; 704; 710; X	4; 194; 288; 294; 452; 470; 609; 615; 631; 634; 637; 644; 681; 686; 704; 710; X	638	391	29	4; 183; 194; 278; 288; 294; 318; 387; 393; 452; 462; 470; 499; 517; 540; 546; 556; 563; 609; 615; 631; 634; 637; 644; 681; 686; 704; 710; X
Cdk11b	12537	568930501	XP_006538570.1	cyclin-dependent kinase 11B	67	91.5	5.39	1.53157	1		11		1		1	11
Smchd1	74355	148839318	NP_083163.3	structural maintenance of chromosomes flexible hinge domain-containing protein 1	162	225.5	7.24	1.52406	2	1	1636; 1977	1977	9	8	2	1636; 1977
Atrx	22589	755565325	XP_011245864.1	transcriptional regulator ATRX	275	278.8	6.73	1.52381	9	4	10; 17; 313; 460; 468; 560; 576; 703; 879	10; 460; 560; 576	32	18	9	10; 17; 313; 460; 468; 560; 576; 703; 879
Prr14	233895	34328357	NP_663564.2	proline-rich protein 14	27	67.8	9.94	1.48543	1	1	329	329	2	2	1	329
Cdyl	12593	6753398	NP_034011.1	chromodomain Y-like protein	45	65.2	8.6	1.41954	2	2	170; 186	170; X	2	3	3	170; 186; X
Rcc2	108911	33239431	NP_776292.1	protein RCC2	30	55.9	8.72	1.41792	1		75		1		1	75
Trim28	21849	170295840	NP_035718.2	transcription intermediary factor 1-beta	42	88.8	5.77	1.41522	1	1	186	186	1	1	1	186
Ahctf1	226747	568910764	XP_006496863.1	protein ELYS	128	254.6	6.65	1.39835	18	9	1041; 1328; 1337; 1352; 1542; 1554; 1560; 1721; 1750; 1771; 2078; 2085; 2220; 2255; 2267; 2280; 2307; X	1328; 1337; 1560; 1721; 1750; 1771; 2078; 2267; X	37	14	18	1041; 1328; 1337; 1352; 1542; 1554; 1560; 1721; 1750; 1771; 2078; 2085; 2220; 2255; 2267; 2280; 2307; X
Lmnb2	16907	113195686	NP_034852.2	lamin-B2	35	67.3	5.5	1.37351	2	1	492; 496	496	3	1	2	492; 496
Tmpo	21917	121949769	NP_001073601.1	lamina-associated polypeptide 2	31	38.5	9.17	1.30801	8	7	202; 206; 212; 224; 236; 258; 279; 283	206; 212; 224; 236; 258; 279; 283	26	18	8	202; 206; 212; 224; 236; 258; 279; 283
Cbx5	12419	116008461	NP_001070257.1	chromobox protein homolog 5	29	22.2	5.86	1.25912	3	2	32; 91; X	91; X	6	3	3	32; 91; X
Tmpo	21917	121949765	NP_001073598.1	lamina-associated polypeptide 2	36	50.3	9.45	1.22589	12	10	202; 206; 212; 259; 285; 302; 322; 333; 345; 367; 388; 392	206; 212; 285; 302; 322; 333; 345; 367; 388; 392	43	33	12	202; 206; 212; 259; 285; 302; 322; 333; 345; 367; 388; 392
S100a6	20200	6755392	NP_035443.1	protein S100-A6	10	10	5.48	1.21599	1	1	47	47	3	2	1	47
Mki67	17345	169234624	NP_001074586.2	antigen KI-67	312	350.7	9.72	1.20945	43	28	169; 289; 292; 351; 357; 508; 599; 666; 675; 685; 748; 785; 806; 831; 853; 945; 976; 999; 1034; 1047; 1050; 1057; 1113; 1136; 1261; 1377; 1420; 1438; 1464; 1604; 1621; 1646; 1668; 1696; 1732; 2027; 2087; 2204; 2344; 2369; 2662; 2995; X	289; 292; 351; 357; 508; 599; 666; 675; 685; 748; 785; 806; 831; 853; 945; 999; 1047; 1136; 1420; 1604; 1621; 1646; 2027; 2087; 2204; 2344; 2369; X	106	70	43	169; 289; 292; 351; 357; 508; 599; 666; 675; 685; 748; 785; 806; 831; 853; 945; 976; 999; 1034; 1047; 1050; 1057; 1113; 1136; 1261; 1377; 1420; 1438; 1464; 1604; 1621; 1646; 1668; 1696; 1732; 2027; 2087; 2204; 2344; 2369; 2662; 2995; X
Hmgn2	15331	8393534	NP_058653.1	non-histone chromosomal protein HMG-17	22	9.4	9.99	1.20883	5	3	31; 48; 76; 90; X	48; 90; X	25	12	5	31; 48; 76; 90; X
Cdca5	67849	13385902	NP_080686.1	sororin	24	29	9.58	1.20727	1	1	61	61	2	2	1	61
Nup98	269966	568950761	XP_006507958.1	nuclear pore complex protein Nup98-Nup96	83	197.2	6.15	1.18301	1	3	1051	551; 639; 1051	1	4	3	551; 639; 1051
Gtf2f2	68705	39930425	NP_081092.1	general transcription factor IIF subunit 2	27	28.4	9.22	1.17951	1		147		2		1	147
Hnrnpr	74326	568931988	XP_006539284.1	heterogeneous nuclear ribonucleoprotein R	44	71.1	8.13	1.14209	1		344		1		1	344
Syncrip	56403	114145493	NP_062640.2	heterogeneous nuclear ribonucleoprotein Q	46	69.6	8.59	1.14209	1		338		1		1	338
Zfp280c	208968	40254197	NP_705760.2	zinc finger protein 280C	74	83.1	9.06	1.14111	10	7	18; 135; 180; 186; 287; 516; 565; 673; 742; X	18; 135; 180; 186; 516; 742; X	30	22	10	18; 135; 180; 186; 287; 516; 565; 673; 742; X
Hmg20a	66867	568961903	XP_006511431.1	high mobility group protein 20A	29	43.3	8.91	1.13291	1	1	176	176	2	1	1	176
A430005L14Rik	97159	247300747	NP_780496.2	UPF0688 protein C1orf174 homolog	15	24.8	6.04	1.12334	2	1	39; 85	39	4	2	2	39; 85
Ctdspl2	329506	47059059	NP_997615.1	CTD small phosphatase-like protein 2	31	52.8	6.25	1.02857	1		57		3		1	57
Senp7	66315	755553918	XP_011244296.1	sentrin-specific protease 7	80	116.3	6.52	1.02503	6	3	31; 34; 39; 51; 66; 734	34; 39; 66	13	6	6	31; 34; 39; 51; 66; 734
Zfp512	269639	254553392	NP_766581.2	zinc finger protein 512	63	63.9	9.51	1.02219	2	1	79; 328	79	4	2	2	79; 328
Sarnp	66118	13384730	NP_079640.1	SAP domain-containing ribonucleoprotein	26	23.5	6.65	1.01293	3	2	92; 135; 142	135; 142	7	4	3	92; 135; 142
Hmga1	15361	262331580	NP_001160009.1	high mobility group protein HMG-I/HMG-Y	16	10.6	10.32	1.00863	5	3	15; 35; 63; 77; X	15; 63; X	23	23	5	15; 35; 63; 77; X
Hmga1	15361	86198323	NP_057869.2	high mobility group protein HMG-I/HMG-Y	16	11.6	10.32	0.988776	5	4	15; 46; 74; 88; X	15; 46; 74; X	26	27	5	15; 46; 74; 88; X
Hmgn1	15312	41406074	NP_032277.3	non-histone chromosomal protein HMG-14	19	10.1	9.76	0.987685	2	2	13; X	13; X	12	9	2	13; X
Nop16	28126	30519925	NP_848720.1	nucleolar protein 16	22	21.1	9.91	0.974529		1		90		1	1	90
Mecp2	17257	126517469	NP_001075448.1	methyl-CpG-binding protein 2	64	53.5	9.88	0.974529	3	2	236; 338; 348	236; 338	11	9	3	236; 338; 348
Tmpo	21917	121949760	NP_035735.2	lamina-associated polypeptide 2	47	75.1	8.05	0.969012	7	6	241; 262; 267; 288; 321; 433; X	262; 267; 288; 321; 433; X	25	22	7	241; 262; 267; 288; 321; 433; X
Hdgfrp2	15193	756761804	NP_001291713.1	hepatoma-derived growth factor-related protein 2	73	75.2	8.59	0.967906	3	2	163; 451; 559	451; 559	4	2	3	163; 451; 559
Gpkow	209416	125991228	NP_776108.2	G patch domain and KOW motifs-containing protein	30	53.8	8.07	0.960141	2		54; 181		3		2	54; 181
Cbx3	12417	108860695	NP_031650.3	chromobox protein homolog 3	25	20.8	5.33	0.957915	3	1	10; 44; X	44	8	3	3	10; 44; X
Kif4	16571	162287089	NP_032472.2	chromosome-associated kinesin KIF4	122	139.4	6.68	0.946357	3	1	677; 1179; X	1179	7	1	3	677; 1179; X
Suz12	52615	40353214	NP_954666.1	polycomb protein Suz12	61	83	8.81	0.942984	2	2	397; X	397; X	4	3	2	397; X
Cdca7	66953	21313220	NP_080142.1	cell division cycle-associated protein 7	24	43.8	8.6	0.941858	1	1	17	17	2	2	1	17
Anln	68743	568960015	XP_006510644.1	actin-binding protein anillin	85	124.9	6.8	0.930548	1	1	685	685	2	1	1	685
Cdca2	108912	160333144	NP_780593.3	cell division cycle-associated protein 2	73	106.3	8.65	0.92448	1		320		1		1	320
Kif18b	70218	254939627	NP_932063.2	kinesin-like protein KIF18B	48	91.9	8.4	0.910733		1		300		1	1	300
Rrp1b	72462	254911009	NP_082520.2	ribosomal RNA processing protein 1 homolog B	73	80.5	9.72	0.896853	1		X		3		1	X
Orc2	18393	6679176	NP_032791.1	origin recognition complex subunit 2	48	65.9	6.81	0.895303	9	7	48; 59; 72; 132; 154; 209; 234; 250; X	72; 93; 154; 209; 234; 250; X	22	15	10	48; 59; 72; 93; 132; 154; 209; 234; 250; X
Top2a	21973	568973595	XP_006533216.1	DNA topoisomerase 2-alpha	175	172.7	8.6	0.892974	8	4	1272; 1279; 1319; 1418; 1450; 1480; 1488; 1513	1279; 1418; 1480; 1488	16	7	8	1272; 1279; 1319; 1418; 1450; 1480; 1488; 1513
Zfp871	208292	140969612	NP_766046.3	zinc finger protein 871	51	71.5	8.28	0.892974	1	1	308	308	5	4	1	308
Ddx21	56200	72384374	NP_062426.2	nucleolar RNA helicase 2	101	93.5	9.11	0.886745	2	1	148; 649	649	3	2	2	148; 649
Wiz	22404	568999838	XP_006524118.1	protein Wiz	66	122.5	9	0.88049	13	8	192; 210; 220; 317; 600; 604; 669; 769; 835; 864; 940; 1052; X	317; 604; 669; 835; 864; 940; 1052; X	32	19	13	192; 210; 220; 317; 600; 604; 669; 769; 835; 864; 940; 1052; X
Zmat2	66492	13385046	NP_079870.1	zinc finger matrin-type protein 2	34	23.6	9.01	0.88049	1	1	64	64	2	2	1	64
Baz1b	22385	170295818	NP_035844.2	tyrosine-protein kinase BAZ1B	161	170.5	8.6	0.870266	5	4	297; 335; 371; 964; X	297; 335; 964; X	86	74	5	297; 335; 371; 964; X
H2afx	15270	7106331	NP_034566.1	histone H2AX	13	15.1	10.74	0.851599	2	1	128; X	X	11	8	2	128; X
Emd	13726	6679641	NP_031953.1	emerin	10	29.4	5.01	0.849599	1	1	104	104	1	1	1	104
Champ1	101994	568953079	XP_006508742.1	chromosome alignment-maintaining phosphoprotein 1	74	87.5	7.85	0.848798	6	4	66; 388; 479; 506; 526; 546	479; 506; 526; 546	12	9	6	66; 388; 479; 506; 526; 546
Usp7	252870	568995352	XP_006522201.1	ubiquitin carboxyl-terminal hydrolase 7	78	132.8	5.66	0.836732	1	1	1137	1137	2	3	1	1137
Pabpn1	54196	9506945	NP_062275.1	polyadenylate-binding protein 2	10	32.3	5.17	0.830255	1	1	203	203	2	2	1	203
Fnbp1l	214459	167900466	NP_001108137.1	formin-binding protein 1-like	55	70.4	6.73	0.830255		1		16		1	1	16
Orc3	50793	227116261	NP_056639.3	origin recognition complex subunit 3	56	82.3	7.4	0.824564	4	3	208; 530; 538; X	530; 538; X	11	8	4	208; 530; 538; X
Lmna	16905	568921945	XP_006501136.1	prelamin-A/C	39	74.2	6.98	0.820894	4	4	233; 420; 450; X	233; 420; 450; X	8	8	4	233; 420; 450; X
Hist1h1b	56702	21426893	NP_064418.1	histone H1.5	65	22.6	10.92	0.813114	6	6	46; 64; 81; 85; 90; X	46; 52; 64; 81; 85; 90	17	13	7	46; 52; 64; 81; 85; 90; X
C1d	57316	568970383	XP_006514825.1	nuclear nucleic acid-binding protein C1D	17	15.9	9.04	0.809826	1	1	119	119	2	1	1	119
Rif1	51869	146231944	NP_780447.4	telomere-associated protein RIF1	188	267	5.6	0.798258	19	12	405; 1049; 1077; 1177; 1228; 1276; 1404; 1647; 1693; 1731; 1739; 1866; 2041; 2139; 2155; 2196; 2305; 2337; X	405; 1049; 1077; 1177; 1276; 1404; 1731; 1739; 2041; 2155; 2337; X	43	29	19	405; 1049; 1077; 1177; 1228; 1276; 1404; 1647; 1693; 1731; 1739; 1866; 2041; 2139; 2155; 2196; 2305; 2337; X
Numa1	101706	568949271	XP_006507236.1	nuclear mitotic apparatus protein 1	149	237.2	5.85	0.787432	8	5	926; 1078; 1438; 1512; 1695; 1704; 1762; 1931	1078; 1512; 1695; 1762; 1931	32	25	8	926; 1078; 1438; 1512; 1695; 1704; 1762; 1931
Gnl2	230737	240120093	NP_663527.2	nucleolar GTP-binding protein 2	76	83.3	9.2	0.787432	2	1	108; 131	108	3	2	2	108; 131
2310036O22Rik	68544	85362708	NP_081036.2	uncharacterized protein C19orf43 homolog	17	18.4	9.67	0.78576	1	1	143	143	8	7	1	143
Krcc1	57896	21704142	NP_663543.1	lysine-rich coiled-coil protein 1	29	30.7	9.19	0.782409	1	1	93	93	2	1	1	93
Hist1h1e	50709	13430890	NP_056602.1	histone H1.4	61	22	11.11	0.754888	7	5	46; 52; 81; 85; 90; 192; X	52; 81; 85; 90; 192	10	7	7	46; 52; 81; 85; 90; 192; X
Lmnb1	16906	188219589	NP_034851.2	lamin-B1	38	66.7	5.16	0.746743	1	1	272	272	2	2	1	272
Whsc1l1	234135	124486903	NP_001074738.1	histone-lysine N-methyltransferase NSD3	122	161.5	8.27	0.746743	2	2	481; 542	542; X	3	4	3	481; 542; X
Hist1h1c	50708	9845257	NP_056601.1	histone H1.2	58	21.3	11	0.740712	5	5	52; 81; 85; 190; X	52; 81; 85; 190; X	11	8	5	52; 81; 85; 190; X
Vps72	21427	83921607	NP_033362.2	vacuolar protein sorting-associated protein 72 homolog	24	40.8	6.4	0.73292	2	2	321; 364	321; 364	4	2	2	321; 364
H2afy	26914	41152517	NP_036145.1	core histone macro-H2A.1	47	39.7	9.8	0.726831	1	1	189	189	4	4	1	189
Racgap1	26934	6755266	NP_036155.1	rac GTPase-activating protein 1	48	70.1	8.51	0.72334	1	1	620	620	3	3	1	620
Utp15	105372	30725776	NP_849249.1	U3 small nucleolar RNA-associated protein 15 homolog	40	59.3	8.79	0.722466	1		384		1		1	384
H2afy	26914	568983377	XP_006517320.1	core histone macro-H2A.1	31	21.1	10.51	0.711935	1	1	189	189	2	4	1	189
Cenpv	73139	225703070	NP_082724.1	centromere protein V	16	27.5	9.79	0.705757	1		244		1		1	244
Fam32a	67922	13385950	NP_080731.1	protein FAM32A	24	13.2	9.94	0.691534	1	1	107	107	3	2	1	107
Nifk	67949	224809384	NP_080748.3	MKI67 FHA domain-interacting nucleolar phosphoprotein	45	36.2	10.24	0.673556	1		162		1		1	162
Pds5b	100710	568939230	XP_006504964.1	sister chromatid cohesion protein PDS5 homolog B	145	164.7	8.54	0.667211	1	1	591	591	2	1	1	591
Clint1	216705	568972933	XP_006532901.1	clathrin interactor 1	41	69.7	6.65	0.666302	1	1	6	6	1	1	1	6
H1f0	14958	31560697	NP_032223.2	histone H1.0	55	20.8	10.9	0.660837	2	1	164; 177	177	2	1	2	164; 177
C330007P06Rik	77644	569009123	XP_006541473.1	UPF0428 protein CXorf56 homolog	22	26.3	7.64	0.660381	2	2	128; X	128; X	12	10	2	128; X
Smarca5	93762	40254124	NP_444354.2	SWI/SNF-related matrix-associated actin-dependent regulator of chromatin subfamily A member 5	94	121.6	8.15	0.656268	3	4	646; 723; X	120; 646; 723; X	24	26	4	120; 646; 723; X
Cops5	26754	7304971	NP_038743.1	COP9 signalosome complex subunit 5	26	37.5	6.54	0.643394	1		210		1		1	210
Hmgn3	94353	568962379	XP_006511654.1	high mobility group nucleosome-binding domain-containing protein 3	19	14	9.86	0.641546	1	2	120	111; 120	4	7	2	111; 120
Uhrf1	18140	161621271	NP_001104548.1	E3 ubiquitin-protein ligase UHRF1	58	88.2	8.31	0.631337	1	1	11	11	2	1	1	11
H2afv	77605	256773209	NP_084214.1	histone H2A.V	14	13.5	10.58	0.616358	1	1	116	116	3	2	1	116
Nipbl	71175	568990286	XP_006520058.1	nipped-B-like protein	243	315.3	7.91	0.615416	4	4	222; 948; 959; X	222; 948; 959; X	13	11	4	222; 948; 959; X
Top2b	21974	34328148	NP_033435.2	DNA topoisomerase 2-beta	187	181.8	8.29	0.607863	2		1473; 1477		3		2	1473; 1477
Ttc14	67120	568921029	XP_006535587.1	tetratricopeptide repeat protein 14	78	90.5	8.91	0.588805		1		461		1	1	461
Psip1	101739	19527168	NP_598709.1	PC4 and SFRS1-interacting protein	83	59.7	9.13	0.582074	7	7	6; 143; 188; 200; 302; 507; X	6; 143; 188; 200; 302; 440; X	17	18	8	6; 143; 188; 200; 302; 440; 507; X
Hist1h3a	360198	32880233	NP_038578.2	histone H3.1	13	15.4	11.12	0.57628	5	6	5; 19; 24; 28; 80	5; 19; 24; 28; 80; 123	18	15	6	5; 19; 24; 28; 80; 123
Hist1h3d	319149	30061337	NP_835511.1	histone H3.2	13	15.4	11.27	0.57628	5	6	5; 19; 24; 28; 80	5; 19; 24; 28; 80; 123	18	15	6	5; 19; 24; 28; 80; 123
Rad18	58186	267844910	NP_001161202.1	E3 ubiquitin-protein ligase RAD18	44	62.5	6.68	0.570949	4	4	127; 135; 151; 177	127; 135; 151; 177	9	8	4	127; 135; 151; 177
Zfp62	22720	568973701	XP_006533261.1	zinc finger protein 62	112	104.7	8.85	0.560226	2	1	52; 54	52	4	1	2	52; 54
Wdr70	545085	124487149	NP_001074871.1	WD repeat-containing protein 70	48	73	6.05	0.549916	1	1	593	593	2	2	1	593
Glyr1	74022	119392074	NP_001073282.1	putative oxidoreductase GLYR1	51	60.4	9.13	0.543991	1		504		2		1	504
Tardbp	230908	21704096	NP_663531.1	TAR DNA-binding protein 43	21	44.5	6.7	0.543001	1	1	95	95	2	1	1	95
Tardbp	230908	56682935	NP_001003898.1	TAR DNA-binding protein 43	21	33.6	7.06	0.543001	1	1	95	95	2	1	1	95
Tardbp	230908	56682931	NP_001003899.1	TAR DNA-binding protein 43	21	33.3	7.06	0.543001	1	1	95	95	2	1	1	95
Dnttip2	99480	24418931	NP_722501.1	deoxynucleotidyltransferase terminal-interacting protein 2	78	84.2	6.44	0.540027	5	4	283; 317; 361; 366; 560	317; 361; 366; 608	8	5	6	283; 317; 361; 366; 560; 608
Gatad2b	229542	21314854	NP_647465.1	transcriptional repressor p66-beta	36	65.4	9.7	0.528071	4	3	50; 52; 499; 594	44; 50; 52	4	3	5	44; 50; 52; 499; 594
AU019823	270156	201025411	NP_001128374.1	uncharacterized protein C11orf57 homolog	47	33.9	9.74	0.525067	2	1	8; 76	8	2	1	2	8; 76
Rsl24d1	225215	38348464	NP_941011.1	probable ribosome biogenesis protein RLP24	28	19.6	9.98	0.519039	1	1	88	88	2	2	1	88
Alyref	21681	6755763	NP_035698.1	THO complex subunit 4	11	26.9	11.15	0.512985	2	2	85; 233	85; 233	4	5	2	85; 233
Ddx46	212880	530585119	NP_001268984.1	probable ATP-dependent RNA helicase DDX46	105	117.4	9.26	0.511468	4	4	263; 895; 904; 908	263; 895; 904; 908	19	14	4	263; 895; 904; 908
Kdm2a	225876	569005736	XP_006531785.1	lysine-specific demethylase 2A	74	132.6	7.52	0.50284	3	2	409; 700; 818	409; 818	3	3	3	409; 700; 818
Psip1	101739	568925923	XP_006537605.1	PC4 and SFRS1-interacting protein	55	39.5	8.68	0.493647	7	7	6; 143; 188; 200; 302; 331; X	6; 143; 188; 200; 302; 331; X	18	18	7	6; 143; 188; 200; 302; 331; X
Scaf11	72193	568993404	XP_006521493.1	protein SCAF11	93	163.7	6.77	0.49211	4	4	1040; 1133; 1169; 1374	1040; 1133; 1169; 1374	6	7	4	1040; 1133; 1169; 1374
Ssb	20823	158636012	NP_001103615.1	lupus La protein homolog	58	47.7	9.77	0.49057	1	1	356	356	1	1	1	356
Kdm6b	216850	755538168	XP_011247225.1	lysine-specific demethylase 6B	67	176.2	8.62	0.489543	1	1	817	817	3	2	1	817
Dsn1	66934	254540034	NP_080129.2	kinetochore-associated protein DSN1 homolog	24	39.5	6.21	0.487486		1		155		1	1	155
Pogz	229584	755503733	XP_011238393.1	pogo transposable element with ZNF domain	71	154.8	7.52	0.485942	3	2	356; 486; 867	486; 867	36	34	3	356; 486; 867
Ppil4	67418	165972339	NP_080417.2	peptidyl-prolyl cis-trans isomerase-like 4	56	57.2	6.11	0.484396	1	1	300	300	2	1	1	300
Sart3	53890	568937362	XP_006530468.1	squamous cell carcinoma antigen recognized by T-cells 3	64	111.5	5.2	0.482332	1	1	975	975	1	2	1	975
Mfap1b	100034361	126517472	NP_001075444.1	microfibrillar-associated protein 1	44	51.9	4.98	0.476122	4	3	324; 371; 376; 381	324; 371; 376	8	7	4	324; 371; 376; 381
Trip12	14897	755493353	XP_011236956.1	E3 ubiquitin-protein ligase TRIP12	128	229.5	8.59	0.467801	2	1	311; 1127	1127	4	2	2	311; 1127
Hnrnpf	98758	261878607	NP_001159904.1	heterogeneous nuclear ribonucleoprotein F	16	45.7	5.49	0.464668	1	2	224	200; 224	4	4	2	200; 224
Exosc9	50911	9506981	NP_062266.1	exosome complex component RRP45	28	48.9	5.11	0.457332	1		297		1		1	297
Mdc1	240087	569000261	XP_006524324.1	mediator of DNA damage checkpoint protein 1	76	184.7	5.17	0.455229	4	2	149; 925; 1081; 1419	149; 1081	7	5	4	149; 925; 1081; 1419
Pgrmc2	70804	226442772	NP_081834.1	membrane-associated progesterone receptor component 2	12	23.3	5.15	0.455229	1	1	129	129	4	2	1	129
Larp7	28036	110665742	NP_613059.2	la-related protein 7	88	64.8	9.54	0.453649	2	1	392; 556	392	2	1	2	392; 556
Phkg2	68961	568951325	XP_006508230.1	phosphorylase b kinase gamma catalytic chain, liver/testis	16	46.5	6.48	0.453122	1		27		1		1	27
Slu7	193116	27477103	NP_683514.2	pre-mRNA-splicing factor SLU7	70	68	7.08	0.451013	1	1	358	358	1	2	1	358
Mafk	17135	568938618	XP_006504716.1	transcription factor MafK	14	17.5	10.1	0.443607	1	1	130	130	1	2	1	130
Chd1	12648	239985588	NP_031716.2	chromodomain-helicase-DNA-binding protein 1	155	196.3	7.37	0.443607	1	1	399	399	1	1	1	399
Utp14a	72554	51889716	NP_082552.1	U3 small nucleolar RNA-associated protein 14 homolog A	91	87.2	9.2	0.443076	2	1	56; 721	721	2	1	2	56; 721
Dido1	23856	568920221	XP_006500679.1	death-inducer obliterator 1	147	247	7.91	0.442015	4	4	592; 821; 1225; 1817	446; 592; 821; 1225	4	6	5	446; 592; 821; 1225; 1817
Ddx23	74351	568993535	XP_006521556.1	probable ATP-dependent RNA helicase DDX23	86	95.4	9.58	0.440421	1	1	309	309	2	1	1	309
Ncbp2	68092	13386056	NP_080830.1	nuclear cap-binding protein subunit 2	13	18	7.81	0.438293	1	1	151	151	2	2	1	151
Zc3h11a	70579	115270986	NP_653113.4	zinc finger CCCH domain-containing protein 11A	81	86.4	8.13	0.438293	3	1	309; 372; 641	641	3	1	3	309; 372; 641
Hist1h1a	80838	21426823	NP_085112.1	histone H1.1	58	21.8	10.93	0.423847	2	1	29; 83	83	2	1	2	29; 83
Pold3	67967	755523051	XP_006508212.2	DNA polymerase delta subunit 3	57	50.8	9.32	0.413594	1	1	188	188	1	2	1	188
Rbm39	170791	118403314	NP_573505.2	RNA-binding protein 39	36	59.4	10.1	0.411969	2	2	111; 119	111; 119	4	4	2	111; 119
Nxf1	53319	31980798	NP_058093.2	nuclear RNA export factor 1	38	70.3	8.73	0.411426	1	1	618	618	2	2	1	618
Vamp1	22317	6678549	NP_033522.1	vesicle-associated membrane protein 1	7	12.9	6.65	0.411426	1	1	54	54	1	2	1	54
Esf1	66580	568918050	XP_006500074.1	ESF1 homolog	127	98	5.05	0.404903	2	2	48; 721	48; 721	6	8	2	48; 721
Adnp	11538	851330596	NP_001297015.1	activity-dependent neuroprotector homeobox protein	98	124.2	6.86	0.399445	3	4	203; 266; 698	203; 266; 595; X	12	12	5	203; 266; 595; 698; X
Wrnip1	78903	254540120	NP_084491.3	ATPase WRNIP1	29	71.7	6.18	0.397255	1	1	631	631	2	1	1	631
Fen1	14156	569006370	XP_006526727.1	flap endonuclease 1	37	42.6	8.34	0.390668	1		345		1		1	345
Mis18bp1	217653	31044421	NP_766166.2	mis18-binding protein 1	106	113.9	9.09	0.368489	2		7; 112		2		2	7; 112
Ddx42	72047	568975951	XP_006534344.1	ATP-dependent RNA helicase DDX42	63	101.9	6.98	0.358396	2	2	61; 709	61; 709	5	2	2	61; 709
Xrcc1	22594	568945263	XP_006539800.1	DNA repair protein XRCC1	41	68.9	6.33	0.358396	2	1	166; 188	188	2	2	2	166; 188
Pdlim7	67399	166197681	NP_001107560.1	PDZ and LIM domain protein 7	29	50.1	8.47	0.348232		1		238		1	1	238
Hnrnpa1	15382	85060507	NP_001034218.1	heterogeneous nuclear ribonucleoprotein A1	18	38.8	9.13	0.347099	1	1	351	351	2	2	1	351
Cenpc1	12617	164698406	NP_031709.2	centromere protein C	98	102.1	9.67	0.344828	1	1	292	292	1	1	1	292
Kif2c	73804	227430340	NP_608301.3	kinesin-like protein KIF2C	50	81	7.97	0.329985	1		138		1		1	138
Hnrnpm	76936	21313308	NP_084080.1	heterogeneous nuclear ribonucleoprotein M	40	77.6	8.63	0.324235	2	2	380; 387	87; 387	3	3	3	87; 380; 387
Exosc10	50912	568931575	XP_006539086.1	exosome component 10	64	102	7.46	0.322505	2	2	178; 716	178; 716	5	6	2	178; 716
Rbm19	74111	30794154	NP_083038.1	probable RNA-binding protein 19	95	106	6.57	0.318461	1		533		1		1	533
LOC102642938	102642938	568904639	XP_006544818.1	heterogeneous nuclear ribonucleoproteins A2/B1	16	36	8.65	0.306846	1	1	X	X	2	3	1	X
Cactin	70312	121583673	NP_081657.1	cactin	47	90.6	9.79	0.302758	2	2	268; 491	268; 491	4	4	2	268; 491
Rlf	109263	568928201	XP_006502719.1	zinc finger protein Rlf	146	217.3	6.71	0.301002	2	1	1474; 1766	1474	3	3	2	1474; 1766
Chaf1b	110749	21312470	NP_082359.1	chromatin assembly factor 1 subunit B	35	63.1	6.55	0.297485		1		501		1	1	501
Hnrnpdl	50926	148664250	NP_057899.2	heterogeneous nuclear ribonucleoprotein D-like	28	46.2	9.57	0.291604	2	1	302; 311	302	2	1	2	302; 311
Nop14	75416	114158701	NP_083554.2	nucleolar protein 14	92	98.7	7.59	0.288063	1		775		2		1	775
H2afj	232440	29244126	NP_808356.1	histone H2A.J	13	14	11.05	0.285106	1	2	X	10; X	2	4	2	10; X
Mphosph8	75339	568988970	XP_006519703.1	M-phase phosphoprotein 8	105	98.8	5.85	0.279768	2	2	376; 450	376; 387	5	5	3	376; 387; 450
Msl3	17692	569011775	XP_006528804.1	male-specific lethal 3 homolog	50	60.3	9.55	0.276199	1		387		1		1	387
Ncl	17975	84875537	NP_035010.3	nucleolin	90	76.7	4.75	0.275007	9	9	3; 63; 71; 102; 116; 230; 478; 569; X	3; 63; 71; 102; 116; 230; 478; 569; X	26	22	9	3; 63; 71; 102; 116; 230; 478; 569; X
Whsc1	107823	295424164	NP_001074571.2	histone-lysine N-methyltransferase NSD2	134	152.3	8.51	0.271426	2	2	14; X	14; X	3	6	2	14; X
Zc3h4	330474	568946013	XP_006540165.1	zinc finger CCCH domain-containing protein 4	74	140.9	6.27	0.267835	1	1	1056	1056	2	2	1	1056
Actb	11461	6671509	NP_031419.1	actin, cytoplasmic 1	19	41.7	5.48	0.264236		1		328		2	1	328
Actc1	11464	14192922	NP_033738.1	actin, alpha cardiac muscle 1	19	42	5.39	0.264236		1		330		2	1	330
Acta2	11475	6671507	NP_031418.1	actin, aortic smooth muscle	19	42	5.39	0.264236		1		330		2	1	330
Actbl2	238880	30425250	NP_780706.1	beta-actin-like protein 2	18	42	5.49	0.264236		1		329		2	1	329
Rrp12	107094	40789092	NP_955518.1	RRP12-like protein	101	143	8.91	0.264236	1	1	1123	1123	1	2	1	1123
Atp6ap2	70495	21361250	NP_081715.1	renin receptor precursor	14	39.1	5.54	0.261832	1		346		1		1	346
Zmym4	67785	167555112	NP_001107871.1	zinc finger MYM-type protein 4	117	172.3	6.8	0.26123	3	3	148; 152; 188	152; 188; 232	4	5	4	148; 152; 188; 232
Nup50	18141	38016154	NP_057923.2	nuclear pore complex protein Nup50	45	49.5	6.24	0.260628	1	1	59	59	2	2	1	59
Rps3a1	20091	254553321	NP_058655.3	40S ribosomal protein S3a	38	29.9	9.73	0.259423	1	1	249	249	2	2	1	249
Prpf4	70052	55925589	NP_081573.1	U4/U6 small nuclear ribonucleoprotein Prp4	34	58.3	7.28	0.255803	1		26		1		1	26
Ddx5	13207	568971472	XP_006532198.1	probable ATP-dependent RNA helicase DDX5	34	69.2	8.92	0.253384	2	1	470; 523	470	8	7	2	470; 523
Psmd8	57296	156713423	NP_080821.3	26S proteasome non-ATPase regulatory subunit 8	26	39.9	9.58	0.235114	1		108		1		1	108
Zfp830	66983	31560213	NP_080160.2	zinc finger protein 830	31	40.6	5.4	0.235114	1	1	250	250	1	1	1	250
Noc3l	57753	188497644	NP_067290.2	nucleolar complex protein 3 homolog	95	93.2	9.09	0.222805	2	1	106; 147	106	3	3	2	106; 147
Hnrnpa0	77134	226443091	NP_084148.1	heterogeneous nuclear ribonucleoprotein A0	18	30.5	9.31	0.22033	1		96		1		1	96
Wwox	80707	31980962	NP_062519.2	WW domain-containing oxidoreductase	18	46.5	7.02	0.207268	1	1	28	28	4	4	1	28
Puf60	67959	76677895	NP_598452.2	poly(U)-binding-splicing factor PUF60	32	58.5	5.35	0.202261	1	1	442	442	10	8	1	442
Hnrnpul2	68693	124487099	NP_001074665.1	heterogeneous nuclear ribonucleoprotein U-like protein 2	44	84.9	4.89	0.197865	2	2	7; 26	7; 26	3	3	2	7; 26
Khsrp	16549	163954948	NP_034743.3	far upstream element-binding protein 2	31	76.7	7.33	0.194087	1		72		1		1	72
Nop58	55989	120407050	NP_061356.2	nucleolar protein 58	72	60.3	8.34	0.190299	2	2	411; 415	323; 411	2	2	3	323; 411; 415
Prdm2	110593	197304755	NP_001074824.3	PR domain zinc finger protein 2	138	187.1	8	0.190299	1		685		1		1	685
Gatad2a	234366	568955385	XP_006509699.1	transcriptional repressor p66 alpha	40	67.7	9.89	0.189034	1	1	550	550	1	3	1	550
Vcpip1	70675	70778826	NP_775619.2	deubiquitinating protein VCIP135	78	134.4	7.17	0.187768	1		690		1		1	690
Prpf3	70767	31980657	NP_081817.2	U4/U6 small nuclear ribonucleoprotein Prp3	79	77.4	9.5	0.186501	1	2	270	143; 270	1	2	2	143; 270
Tpr	108989	270309140	NP_598541.3	nucleoprotein TPR	176	273.8	5.03	0.182692	3	2	440; 464; 1633	440; 464	12	9	3	440; 464; 1633
Lcor	212391	755563036	XP_011245516.1	ligand-dependent corepressor	129	200.7	6.18	0.182692	2	2	303; 571	303; 571	3	4	2	303; 571
Raly	19383	213417799	NP_001132984.1	RNA-binding protein Raly short	22	31.2	9.38	0.179511	1	2	149	130; 149	2	4	2	130; 149
Lima1	65970	165905585	NP_001107017.1	LIM domain and actin-binding protein 1	66	84	6.6	0.177599	3	5	186; 649; 719	186; 198; 203; 649; 719	4	8	5	186; 198; 203; 649; 719
Lima1	65970	158518433	NP_075550.2	LIM domain and actin-binding protein 1	52	66	5.91	0.177599	3	5	26; 489; 559	26; 38; 43; 489; 559	4	8	5	26; 38; 43; 489; 559
Foxc1	17300	50345972	NP_032618.2	forkhead box protein C1	18	56.9	8.51	0.177599	1	1	552	552	1	1	1	552
Gpatch1	67471	13385692	NP_080457.1	G patch domain-containing protein 1	92	102.9	6.98	0.175045	1	1	923	923	4	4	1	923
Arglu1	234023	134152669	NP_789819.2	arginine and glutamate-rich protein 1	33	32.9	10.36	0.163499	2	2	251; 262	251; 262	3	4	2	251; 262
Pnn	18949	112420990	NP_032917.2	pinin	61	82.5	7.01	0.158337	4	4	16; 108; 109; 212	16; 108; 109; 212	9	11	4	16; 108; 109; 212
Hcfc2	67933	755534989	XP_011241845.1	host cell factor 2	46	95.6	9.11	0.154454	1	1	587	587	3	3	1	587
Ppp1r10	52040	255308881	NP_001157290.1	serine/threonine-protein phosphatase 1 regulatory subunit 10	66	94.3	9.16	0.151859	1	1	235	235	4	3	1	235
Xab2	67439	13385660	NP_080432.1	pre-mRNA-splicing factor SYF1	43	99.9	6.23	0.15056	1	1	794	794	2	3	1	794
Mybbp1a	18432	31982724	NP_058056.2	myb-binding protein 1A	106	151.9	8.95	0.146655	3	3	9; 1297; 1302	1243; 1297; 1302	7	8	4	9; 1243; 1297; 1302
Hnrnpu	51810	160333923	NP_058085.2	heterogeneous nuclear ribonucleoprotein U	67	87.9	6.24	0.146655	5	4	12; 176; 181; 613; 789	176; 181; 210; 789	12	12	6	12; 176; 181; 210; 613; 789
Fip1l1	66899	568935060	XP_006504327.1	pre-mRNA 3'-end-processing factor FIP1	31	67.5	5.59	0.126973	3	3	234; 264; X	234; 264; X	8	13	3	234; 264; X
Rfc4	106344	21703948	NP_663455.1	replication factor C subunit 4	30	39.8	6.7	0.115033	1		6		1		1	6
Ccdc12	72654	227496903	NP_082588.2	coiled-coil domain-containing protein 12	18	18.9	7.21	0.111031	1	1	53	53	3	4	1	53
Pes1	64934	12584984	NP_075027.1	pescadillo homolog	56	67.8	6.84	0.0806577	1	1	546	546	8	7	1	546
Cdc23	52563	30387632	NP_848124.1	cell division cycle protein 23 homolog	40	68.5	7.05	0.077243	1	1	522	522	1	1	1	522
Rbmx2	209003	27734072	NP_775552.1	RNA-binding motif protein, X-linked 2	42	37.5	9.72	0.0745054	1	1	6	6	2	3	1	6
Nup153	218210	254588102	NP_786925.2	nuclear pore complex protein Nup153	96	151.9	8.84	0.0669502	3	5	597; 1055; 1075	597; 1045; 1055; 1068; 1075	7	11	5	597; 1045; 1055; 1068; 1075
Pop1	67724	23097256	NP_690854.1	ribonucleases P/MRP protein subunit POP1	72	117.3	9.11	0.0593553	1	1	778	778	1	1	1	778
Serbp1	66870	165932375	NP_080090.2	plasminogen activator inhibitor 1 RNA-binding protein	35	44.7	8.54	0.0565835	1	2	122	122; 302	4	6	2	122; 302
Hist1h2bb	319178	28316760	NP_783595.1	histone H2B type 1-B	20	13.9	10.32	0.0496308	5	6	21; 86; 109; 117; X	21; 47; 86; 109; 117; X	11	16	6	21; 47; 86; 109; 117; X
Hist2h2bb	319189	68226433	NP_783597.2	histone H2B type 2-B	20	13.9	10.32	0.0440443	5	6	21; 86; 109; 117; X	21; 47; 86; 109; 117; X	15	22	6	21; 47; 86; 109; 117; X
Taf15	70439	30794412	NP_081703.1	TATA-binding protein-associated factor 2N	16	58.6	8.4	0.0370307		1		304		1	1	304
Fam208b	105203	568981343	XP_006516523.1	protein FAM208B	191	264.1	6.44	0.0285692	2	1	567; 1466	1466	2	1	2	567; 1466
Tead1	21676	262205246	NP_001160056.1	transcriptional enhancer factor TEF-1	31	49.1	8.97	0.0193461	1	1	114	114	3	5	1	114
Nudt21	68219	13386106	NP_080899.1	cleavage and polyadenylation specificity factor subunit 5	14	26.2	8.82	0.0114956	1	1	23	23	1	1	1	23
Jmjd1c	108829	568966274	XP_006513098.1	probable JmjC domain-containing histone demethylation protein 2C	195	281.4	7.88	0.00288251	1	1	2067	2067	1	1	1	2067
Pbrm1	66923	568988483	XP_006519465.1	protein polybromo-1	144	197.4	7.28	0	3	2	315; 1439; 1697	315; 1697	5	3	3	315; 1439; 1697
Rbm28	68272	166235127	NP_598686.2	RNA-binding protein 28	106	84.2	9.54	0	1		X		2		1	X
Utrn	22288	568965341	XP_006512769.1	utrophin	248	393.1	5.38	0	1		2210		1		1	2210
2410004B18Rik	66421	13384984	NP_079831.1	UPF0690 protein C1orf52 homolog	20	20.1	5.11	-0.00433459	1	1	76	76	1	2	1	76
Hnrnpa2b1	53379	755517048	XP_006506436.2	heterogeneous nuclear ribonucleoproteins A2/B1	19	37.4	8.95	-0.00505829	2	2	3; X	3; X	8	9	2	3; X
Rp9	55934	9055300	NP_061209.1	retinitis pigmentosa 9 protein homolog	34	25.2	9.83	-0.011588	1	1	82	82	1	2	1	82
Prpf40a	56194	9055218	NP_061255.1	pre-mRNA-processing factor 40 homolog A	101	108.4	7.69	-0.013043	1	1	205	205	2	2	1	205
Hist3h2bb-ps	382522	46049029	NP_996765.1	histone H2B type 3-B	22	17.1	10.05	-0.013043	5	6	49; 114; 137; 145; X	49; 75; 114; 137; 145; X	10	15	6	49; 75; 114; 137; 145; X
Cbfb	12400	238814337	NP_001154930.1	core-binding factor subunit beta	8	21.5	6.8	-0.0159576	1	1	X	X	2	4	1	X
Poldip3	73826	30519969	NP_848742.1	polymerase delta-interacting protein 3	37	46.1	10.05	-0.0247367	1	1	229	229	2	2	1	229
Med12	59024	125628662	NP_067496.2	mediator of RNA polymerase II transcription subunit 12	109	244.4	7.17	-0.0247367	1	1	1665	1665	1	2	1	1665
Prpf31	68988	568946531	XP_006540409.1	U4/U6 small nuclear ribonucleoprotein Prp31	39	55.4	5.67	-0.0262051	1	1	478	478	2	2	1	478
Snrnp40	66585	115298670	NP_079921.2	U5 small nuclear ribonucleoprotein 40 kDa protein	19	39.3	8.1	-0.0291463	1	1	8	8	2	2	1	8
Nat10	98956	23346561	NP_694766.1	N-acetyltransferase 10	73	115.3	8.32	-0.0320936	1	1	922	922	2	2	1	922
Fip1l1	66899	227330595	NP_001153045.1	pre-mRNA 3'-end-processing factor FIP1	30	64.9	5.77	-0.0320936	2	3	241; X	209; 241; X	4	9	3	209; 241; X
Zfml	18139	568941006	XP_006505769.1	zinc finger protein 638	186	224.2	6.86	-0.0417141	3	4	483; 497; X	489; 497; 1439; X	9	8	5	483; 489; 497; 1439; X
Hist1h4k	319160	30061359	NP_835583.1	histone H4	11	11.4	11.36	-0.0424568	5	5	9; 13; 21; 92; X	9; 13; 21; 92; X	29	34	5	9; 13; 21; 92; X
Ccdc55	237859	59858549	NP_001012309.1	nuclear speckle splicing regulatory protein 1	66	63.8	8.76	-0.0513992		1		108		1	1	108
LOC105243690	105243690	755490560	XP_011236511.1	nucleophosmin-like	26	19.1	5.2	-0.0528949	8	7	62; 66; 75; 85; 95; 135; 145; X	75; 85; 95; 135; 139; 145; X	19	20	9	62; 66; 75; 85; 95; 135; 139; 145; X
Mef2d	17261	19526812	NP_598426.1	myocyte-specific enhancer factor 2D	19	54.2	8.59	-0.0603973	1	2	507	279; 507	1	3	2	279; 507
Pnisr	66625	226437597	NP_079945.1	arginine/serine-rich protein PNISR	72	93.1	10.08	-0.0634092	1	1	730	730	2	3	1	730
Snw1	66354	146149191	NP_079783.2	SNW domain-containing protein 1	53	61.4	9.48	-0.0664274	5	5	95; 115; 170; 193; 441	95; 115; 170; 193; 441	9	10	5	95; 115; 170; 193; 441
Ddx39b	53817	9790069	NP_062667.1	spliceosome RNA helicase Ddx39b	29	49	5.67	-0.0740006		1		36		1	1	36
Ddx39	68278	568957494	XP_006531395.1	ATP-dependent RNA helicase DDX39A	27	49	5.68	-0.0740006		1		35		1	1	35
Mcph1	244329	755524470	XP_011240358.1	microcephalin	72	96.9	8.28	-0.0747601	1	1	405	405	4	3	1	405
Tfe3	209446	157384990	NP_766060.2	transcription factor E3	19	61.4	5.59	-0.07552	2	2	177; 384	177; 384	5	8	2	177; 384
Npm1	18148	356582426	NP_001239190.1	nucleophosmin	29	28.4	4.69	-0.0846703	7	6	27; 201; 211; 221; 248; 255; X	201; 211; 221; 248; 255; X	34	36	7	27; 201; 211; 221; 248; 255; X
Ccnt1	12455	6753316	NP_033963.1	cyclin-T1	47	80.5	8.68	-0.0846703	4	2	342; 484; 556; 589	484; 556	13	9	4	342; 484; 556; 589
Rbm26	74213	123701991	NP_598838.3	RNA-binding protein 26	78	110.9	9.07	-0.0969617	2	2	618; 685	618; 685	3	4	2	618; 685
Safb2	224902	569000046	XP_006524219.1	scaffold attachment factor B2	70	119.6	6.65	-0.107803	1		690		2		1	690
Sf1	22668	569005760	XP_006531797.1	splicing factor 1	30	65.8	9.35	-0.114035	1	1	454	454	3	2	1	454
Knop1	66356	158966725	NP_075686.2	lysine-rich nucleolar protein 1	88	59.6	9.98	-0.118727	2	2	447; 516	447; 516	7	6	2	447; 516
Casc5	76464	125628638	NP_083893.2	protein CASC5	188	238	5.72	-0.121863	1	1	405	405	2	2	1	405
Sap30bp	57230	31560336	NP_065229.2	SAP30-binding protein	32	33.8	4.87	-0.127368	2	2	205; 220	205; 220	2	5	2	205; 220
U2surp	67958	171460910	NP_001108449.1	U2 snRNP-associated SURP motif-containing protein	107	118.2	8.47	-0.128156	1	2	82	82; 760	2	4	2	82; 760
Nono	53610	357394934	NP_001239447.1	non-POU domain-containing octamer-binding protein	27	54.5	8.95	-0.129734	6	7	5; 200; 245; 251; 373; 469	5; 111; 200; 245; 251; 373; 469	18	22	7	5; 111; 200; 245; 251; 373; 469
Nono	53610	569010350	XP_006528201.1	non-POU domain-containing octamer-binding protein	27	55.5	8.66	-0.129734	6	7	5; 200; 245; 251; 373; 478	5; 111; 200; 245; 251; 373; 478	13	17	7	5; 111; 200; 245; 251; 373; 478
Stag1	20842	568960980	XP_006510987.1	cohesin subunit SA-1	74	144.3	5.59	-0.137648	1	1	1177	1177	1	1	1	1177
Cisd1	52637	19527228	NP_598768.1	CDGSH iron-sulfur domain-containing protein 1	13	12.1	9.06	-0.137648	1		68		1		1	68
Epb4.1l1	13821	568915341	XP_006498771.1	band 4.1-like protein 1	99	174.6	5.39	-0.142417	1		536		1		1	536
Safb	224903	569000056	XP_006524223.1	scaffold attachment factor B1	59	105.3	5.38	-0.145605	5	6	458; 497; 590; 600; X	458; 491; 497; 592; 629; X	8	10	8	458; 491; 497; 590; 592; 600; 629; X
Sdpr	20324	20270267	NP_620080.1	serum deprivation-response protein	36	46.7	5.21	-0.147202	1	1	261	261	1	1	1	261
Maff	17133	756761817	NP_001291760.1	transcription factor MafF	14	19.8	10.05	-0.16004	2	2	40; 169	40; 169	4	5	2	40; 169
Myo5a	17918	568960777	XP_006510890.1	unconventional myosin-Va	167	218.6	8.51	-0.16004		1		X		3	1	X
Ints1	68510	568938771	XP_006504790.1	integrator complex subunit 1	87	248.2	6.37	-0.168123		1		60		1	1	60
Atp6v1a	11964	755553090	XP_011244111.1	V-type proton ATPase catalytic subunit A	35	68.3	5.58	-0.177882		1		5		1	1	5
Ktn1	16709	568986868	XP_006518690.1	kinectin	163	152.4	5.9	-0.181149	1		1272		1		1	1272
Wdr18	216156	83649741	NP_780659.2	WD repeat-containing protein 18	16	47.2	6.89	-0.184425	1	1	431	431	2	1	1	431
Zfr	22763	568990435	XP_006520120.1	zinc finger RNA-binding protein	75	117.7	9.01	-0.185245	1	1	509	509	4	3	1	509
Tpm1	22003	256000780	NP_001157720.1	tropomyosin alpha-1 chain	39	32.7	4.74	-0.190997	1	2	149	149; 168	1	2	2	149; 168
Tpm1	22003	256000784	NP_001157722.1	tropomyosin alpha-1 chain	36	32.8	4.78	-0.190997	1	2	149	149; 168	1	2	2	149; 168
Tpm1	22003	256000788	NP_001157724.1	tropomyosin alpha-1 chain	24	28.5	4.77	-0.190997	1	2	113	113; 132	1	2	2	113; 132
Pakap	677884	752507732	NP_001291473.1	paralemmin A kinase anchor protein	71	119.3	5.15	-0.195946	1	1	49	X	1	2	2	49; X
Myef2	17876	244790087	NP_001155889.1	myelin expression factor 2	43	63.3	8.87	-0.199255	1		34		1		1	34
Zfp740	68744	755552076	XP_011244022.1	zinc finger protein 740	19	20.9	9.19	-0.199255	1	1	9	9	1	1	1	9
Ehmt1	77683	568914498	XP_006498485.1	histone-lysine N-methyltransferase EHMT1	78	143.5	5.99	-0.200913	1	1	331	331	17	15	1	331
Nfil3	18030	8393832	NP_059069.1	nuclear factor interleukin-3-regulated protein	40	50.9	7.21	-0.202572	1	1	448	448	2	3	1	448
Sf3a1	67465	165932270	NP_080451.4	splicing factor 3A subunit 1	58	88.5	5.22	-0.204233	1	2	531	465; 531	1	3	2	465; 531
Wdr60	217935	568979469	XP_006515843.1	WD repeat-containing protein 60	85	119.2	7.3	-0.204233		1		413		1	1	413
Tox4	268741	166706895	NP_075923.2	TOX high mobility group box family member 4	27	65.9	5.01	-0.205896	3	3	199; 492; 619	199; 492; 619	19	19	3	199; 492; 619
Surf6	20935	6678185	NP_033324.1	surfeit locus protein 6	58	41.2	10.52	-0.210897	2	2	122; 196	122; 196	7	9	2	122; 196
Zfp516	329003	569005379	XP_006526562.1	zinc finger protein 516	72	124.7	8.51	-0.21424	3	2	138; 717; 1056	138; 1056	8	7	3	138; 717; 1056
Zfp281	226442	237681154	NP_001153723.1	zinc finger protein 281	58	96.6	8.56	-0.21424	1	1	461	461	1	1	1	461
Tfip11	54723	10190660	NP_061253.2	tuftelin-interacting protein 11	63	96.2	5.9	-0.216753	2	2	160; 278	160; 278	4	5	2	160; 278
Dpf2	19708	597517966	NP_001278007.1	zinc finger protein ubi-d4	34	45.8	7.14	-0.226004	1	1	332	332	1	3	1	332
Zc3h14	75553	231570586	NP_083610.2	zinc finger CCCH domain-containing protein 14	52	82.4	7.37	-0.228537	2	3	352; 357	245; 304; 352	3	4	4	245; 304; 352; 357
Cald1	109624	568940274	XP_006505415.1	caldesmon	63	61.9	6.93	-0.232769	12	12	119; 245; 247; 278; 379; 384; 389; 399; 417; 456; 461; 501	119; 245; 247; 379; 384; 389; 399; 417; 456; 461; 501; X	23	28	13	119; 245; 247; 278; 379; 384; 389; 399; 417; 456; 461; 501; X
Cald1	109624	755515846	XP_006505409.2	caldesmon	88	88.3	5.52	-0.232769	14	14	113; 433; 475; 477; 508; 609; 614; 619; 629; 647; 686; 691; 731; 765	113; 433; 475; 477; 609; 614; 619; 629; 647; 686; 691; 731; 765; X	29	34	15	113; 433; 475; 477; 508; 609; 614; 619; 629; 647; 686; 691; 731; 765; X
Tfap4	83383	13626034	NP_112459.1	transcription factor AP-4	17	38.7	6.09	-0.242977		1		X		4	1	X
Tfeb	21425	239835744	NP_035679.3	transcription factor EB	21	59.4	5.54	-0.24554	2	2	149; 332	149; 332	4	4	2	149; 332
Myo1c	17913	568972076	XP_006532492.1	unconventional myosin-Ic	67	121.9	9.35	-0.251539	1	1	532	532	2	1	1	532
Trp53bp1	27223	755499824	XP_011237883.1	tumor suppressor p53-binding protein 1	97	212.6	4.63	-0.254978	1	1	920	920	1	2	1	920
Smarce1	57376	10181166	NP_065643.1	SWI/SNF-related matrix-associated actin-dependent regulator of chromatin subfamily E member 1	30	46.6	4.88	-0.2567	1	1	92	92	3	3	1	92
Phf5a	68479	24415990	NP_081013.1	PHD finger-like domain-containing protein 5A	12	12.4	8.41	-0.258425		1		95		2	1	95
Nes	18008	50363232	NP_057910.3	nestin	74	207	4.34	-0.262746	8	8	380; 401; 657; 745; 855; 912; 1024; X	380; 657; 745; 789; 855; 1024; 1416; X	23	28	10	380; 401; 657; 745; 789; 855; 912; 1024; 1416; X
Rrs1	59014	227908779	NP_067486.2	ribosome biogenesis regulatory protein homolog	43	41.5	10.77	-0.263612	1	1	198	198	4	4	1	198
Ruvbl1	56505	9790083	NP_062659.1	ruvB-like 1	41	50.2	6.42	-0.264478	1	1	2	2	13	17	1	2
Brd4	57261	569001145	XP_006524753.1	bromodomain-containing protein 4	114	152.7	9.2	-0.270556		2		1054; X		3	2	1054; X
Larp1	73158	226442901	NP_082727.1	la-related protein 1	83	121.1	8.79	-0.272297	1	1	125	125	2	2	1	125
Suv420h1	225888	268607625	NP_001161359.1	histone-lysine N-methyltransferase SUV420H1	76	98.5	8.5	-0.272297	1	1	482	482	1	2	1	482
Wdr43	72515	755559096	XP_011244946.1	WD repeat-containing protein 43	53	75.3	5.38	-0.277534	2	1	366; 390	390	3	2	2	366; 390
Pcx	18563	251823980	NP_001156418.1	pyruvate carboxylase, mitochondrial	58	129.7	6.71	-0.277534	1	1	1145	1145	89	79	1	1145
Mphosph10	67973	68303650	NP_080759.2	U3 small nucleolar ribonucleoprotein protein MPP10	86	78.7	4.87	-0.284546	1	1	519	519	1	2	1	519
Phf3	213109	124487309	NP_001074549.1	PHD finger protein 3	185	225.4	6.7	-0.301337	1	2	1114	1114; X	1	5	2	1114; X
Rpl24	68193	18250296	NP_077180.1	60S ribosomal protein L24	27	17.8	11.25	-0.312939		1		147		1	1	147
Cdc5l	71702	22779899	NP_690023.1	cell division cycle 5-like protein	77	92.1	8.02	-0.320126		1		294		1	1	294
Usp36	72344	226442882	NP_001028700.1	ubiquitin carboxyl-terminal hydrolase 36	93	119.8	9.82	-0.321928	1	1	580	580	2	1	1	580
Snrpc	20630	6755596	NP_035562.1	U1 small nuclear ribonucleoprotein C	8	17.4	9.67	-0.328254	1	1	52	52	4	6	1	52
Thrap3	230753	755508129	XP_011238805.1	thyroid hormone receptor-associated protein 3	99	108.1	10.17	-0.330973	3	3	452; 516; 524	452; 516; 524	6	8	3	452; 516; 524
Rbm17	76938	22779924	NP_690037.1	splicing factor 45	36	45.3	5.82	-0.336428	5	5	24; 58; 245; 276; X	24; 34; 58; 256; 276	14	14	7	24; 34; 58; 245; 256; 276; X
Ndc1	72787	28077005	NP_082631.1	nucleoporin NDC1	25	75.4	8.9	-0.341903	1	1	436	436	2	2	1	436
Plec	18810	254675265	NP_958796.2	plectin	262	517	5.8	-0.350155	7	10	430; 1578; 1585; 2424; 2496; 2912; 4468	430; 1578; 1585; 2424; 2469; 2490; 2496; 2912; 3317; 4468	17	31	10	430; 1578; 1585; 2424; 2469; 2490; 2496; 2912; 3317; 4468
Plec	18810	254675115	NP_001157012.1	plectin	264	533.9	5.96	-0.350155	7	10	578; 1726; 1733; 2572; 2644; 3060; 4616	578; 1726; 1733; 2572; 2617; 2638; 2644; 3060; 3465; 4616	17	31	10	578; 1726; 1733; 2572; 2617; 2638; 2644; 3060; 3465; 4616
Atf1	11908	568991174	XP_006520415.1	cyclic AMP-dependent transcription factor ATF-1	15	29.2	8.37	-0.357529	2	1	251; 267	267	5	3	2	251; 267
Cltb	74325	568983719	XP_006517481.1	clathrin light chain B	17	25.2	4.63	-0.358454	1	1	223	223	2	2	1	223
Top1	21969	112734855	NP_033434.2	DNA topoisomerase 1	133	90.8	9.33	-0.367732	1	1	150	150	4	5	1	150
Vim	22352	31982755	NP_035831.2	vimentin	22	53.7	5.12	-0.373327	5	4	143; 294; 439; 445; X	294; 439; 445; X	33	43	5	143; 294; 439; 445; X
Sfpq	71514	23956214	NP_076092.1	splicing factor, proline- and glutamine-rich	33	75.4	9.44	-0.380822	1	2	X	203; X	1	7	2	203; X
Sfpq	71514	568929767	XP_006503469.1	splicing factor, proline- and glutamine-rich	34	81.6	9.61	-0.380822		1		292		1	1	292
Ahnak2	100041194	568899234	XP_006543088.1	protein AHNAK2	149	209.3	5.95	-0.380822	2	3	592; 606	592; 602; 606	3	6	3	592; 602; 606
Phip	83946	124487035	NP_001074685.1	PH-interacting protein	133	206.6	8.85	-0.392137	2	3	1553; 1736	773; 1553; 1736	2	5	3	773; 1553; 1736
Matr3	17184	25141233	NP_034901.2	matrin-3	66	94.6	6.25	-0.394032	1	1	797	797	2	2	1	797
Sorbs2	234214	755525454	XP_011240504.1	sorbin and SH3 domain-containing protein 2	81	156.4	7.69	-0.394032	2	1	373; 404	373	4	6	2	373; 404
Rnps1	19826	121674793	NP_033096.2	RNA-binding protein with serine-rich domain 1	29	34.2	11.84	-0.397828	2	2	186; X	186; X	18	19	2	186; X
Wdhd1	218973	568987294	XP_006518893.1	WD repeat and HMG-box DNA-binding protein 1	74	124.3	5.6	-0.401635	1	1	906	906	3	4	1	906
Hmgxb4	70823	568957557	XP_006531425.1	HMG domain-containing protein 4	82	69.8	9.51	-0.402588	1	1	234	234	1	1	1	234
Sart1	20227	124244096	NP_058578.3	U4/U6.U5 tri-snRNP-associated protein 1	76	90.8	5.82	-0.406407	6	5	279; 530; 654; 663; 715; X	279; 654; 663; 715; X	12	12	6	279; 530; 654; 663; 715; X
Rbm10	236732	269847199	NP_001161248.1	RNA-binding protein 10	49	94.4	6.7	-0.413115	2	2	124; 843	124; 843	26	38	2	124; 843
Rbm10	236732	21704124	NP_663602.1	RNA-binding protein 10	50	103.4	5.92	-0.413115	2	2	201; 920	201; 920	26	38	2	201; 920
Macf1	11426	755507642	XP_011238694.1	microtubule-actin cross-linking factor 1	557	862.5	5.35	-0.430509	1	1	7434	7434	1	2	1	7434
Tada3	101206	568940039	XP_006505301.1	transcriptional adapter 3	44	49.7	6.27	-0.431481	1	1	137	137	3	5	1	137
Epb4.1l2	13822	568964823	XP_006512572.1	band 4.1-like protein 2	81	117.6	5.39	-0.434403	1	2	1003	507; 1003	2	3	2	507; 1003
Mdn1	100019	568925788	XP_006537539.1	midasin	306	629.9	5.72	-0.441243	1	1	22	22	4	3	1	22
Ssfa2	70599	194473671	NP_542125.3	sperm-specific antigen 2 homolog	56	136.9	5.26	-0.442222		1		580		2	1	580
Tjp2	21873	569006866	XP_006526967.1	tight junction protein ZO-2	69	135.7	7.9	-0.454032	1	1	1101	1101	1	2	1	1101
Nmt1	18107	568972110	XP_006532508.1	glycylpeptide N-tetradecanoyltransferase 1	42	56.9	8	-0.459973		1		94		2	1	94
Dot1l	208266	755534307	XP_011241692.1	histone-lysine N-methyltransferase, H3 lysine-79 specific	98	185.2	9.31	-0.463947		1		776		1	1	776
Rps2	16898	18087805	NP_032529.2	40S ribosomal protein S2	24	31.2	10.24	-0.475936	1	1	263	263	1	2	1	263
Bclaf1	72567	70906449	NP_001020564.1	bcl-2-associated transcription factor 1	87	100.2	9.96	-0.483985	5	7	333; 419; 439; 460; 548	302; 333; 419; 439; 460; 534; 548	8	12	7	302; 333; 419; 439; 460; 534; 548
Erc1	111173	568940315	XP_006505434.1	ELKS/Rab6-interacting/CAST family member 1	110	128.3	5.91	-0.492079	1	1	187	187	2	3	1	187
Vezf1	22344	569017593	XP_006536517.1	vascular endothelial zinc finger 1	36	57.2	9.57	-0.496142	3	3	100; 326; 365	100; 326; 365	8	9	3	100; 326; 365
Kmt2b	75410	594542481	NP_001277502.1	histone-lysine N-methyltransferase 2B	121	295.7	8.03	-0.50226	3	3	802; 805; 2201	802; 805; 2201	10	12	3	802; 805; 2201
Zfp292	30046	169234810	NP_038917.2	zinc finger protein 292	232	300.9	7.53	-0.518701	2	4	621; 2323	621; 816; 1139; 2323	3	6	4	621; 816; 1139; 2323
Sf3b1	81898	153791358	NP_112456.2	splicing factor 3B subunit 1	84	145.7	7.09	-0.524915	3	3	6; 141; 182	6; 141; 182	4	6	3	6; 141; 182
Shroom4	208431	569008587	XP_006527610.1	protein Shroom4	91	165	6.84	-0.53952	1	1	555	555	7	8	1	555
Spen	56381	568931674	XP_006539132.1	msx2-interacting protein	237	398.4	8.54	-0.53952	4	4	1446; 2533; 2613; 2941	1446; 2533; 2613; 2941	7	8	4	1446; 2533; 2613; 2941
Bclaf1	72567	70906447	NP_001020563.1	bcl-2-associated transcription factor 1	92	105.9	9.99	-0.540568	6	9	333; 419; 439; 460; 548; 830	302; 333; 419; 439; 460; 534; 548; 830; X	9	16	9	302; 333; 419; 439; 460; 534; 548; 830; X
Arid1b	239985	145553997	NP_001078824.1	AT-rich interactive domain-containing protein 1B	81	237.6	6.73	-0.547932	2	1	1566; X	X	5	2	2	1566; X
Chd7	320790	460838688	NP_001264078.1	chromodomain-helicase-DNA-binding protein 7	201	333.9	6.47	-0.556393		1		78		2	1	78
Aatf	56321	9790013	NP_062790.1	protein AATF	43	59.4	4.93	-0.567041		1		57		1	1	57
Ints12	71793	21313674	NP_082203.1	integrator complex subunit 12	53	48.5	9.69	-0.575615	1	1	360	360	4	4	1	360
Rad21	19357	568991778	XP_006520707.1	double-strand-break repair protein rad21 homolog	42	72	4.64	-0.577767		1		577		1	1	577
Tjp1	21872	568947647	XP_006540841.1	tight junction protein ZO-1	118	209.6	7.25	-0.586406		1		1449		1	1	1449
Fmr1	14265	51036613	NP_032057.2	fragile X mental retardation protein 1 homolog	41	68.8	7.42	-0.606035	1	1	371	371	1	4	1	371
Nolc1	70769	86198329	NP_001034441.1	nucleolar and coiled-body phosphoprotein 1	109	73.7	9.36	-0.608232	1	2	360	113; 396	1	3	3	113; 360; 396
Zdhhc5	228136	21450253	NP_659136.1	palmitoyltransferase ZDHHC5	33	77.5	9.01	-0.614845		1		414		1	1	414
Bptf	207165	755537881	XP_011247144.1	nucleosome-remodeling factor subunit BPTF	239	346.3	6.81	-0.62371	1	1	2100	2100	1	2	1	2100
Zc3h18	76014	568957777	XP_006531532.1	zinc finger CCCH domain-containing protein 18	81	112.4	8.44	-0.635988	2	3	365; X	365; 956; X	5	9	3	365; 956; X
Wdr33	74320	569004614	XP_006526361.1	pre-mRNA 3' end processing protein WDR33	57	145.2	7.21	-0.639355	1	1	28	28	1	2	1	28
Cwc15	66070	568959923	XP_006510600.1	spliceosome-associated protein CWC15 homolog	23	26.6	5.71	-0.667722	2	3	28; 40	28; 40; 183	6	7	3	28; 40; 183
Sugp1	70616	568955597	XP_006509801.1	SURP and G-patch domain-containing protein 1	56	72.6	7.64	-0.670015	2	2	97; 417	97; 417	4	4	2	97; 417
Hist1h2ao	665433	294712564	NP_001171015.1	histone H2A type 1	13	14.1	11.05	-0.675765	2	3	37; X	37; 119; X	3	6	3	37; 119; X
Ckap5	75786	568918746	XP_006500406.1	cytoskeleton-associated protein 5	214	226.6	8.02	-0.685014		1		1531		1	1	1531
Zfp609	214812	209447068	NP_766124.2	zinc finger protein 609	129	151	8	-0.68966		1		567		2	1	567
Srsf11	69207	568923916	XP_006502078.1	serine/arginine-rich splicing factor 11	50	57.4	10.61	-0.691989	1	1	225	225	2	2	1	225
Zmynd8	228880	568916742	XP_006499441.1	protein kinase C-binding protein 1	117	140.4	7.36	-0.696658	3	5	448; 877; 1224	443; 448; 849; 877; 1224	4	11	5	443; 448; 849; 877; 1224
Arid2	77044	262231796	NP_780460.3	AT-rich interactive domain-containing protein 2	78	195.9	7.47	-0.710756	3	3	706; 1256; 1527	706; 1256; 1527	9	13	3	706; 1256; 1527
Cstf2t	83410	148277061	NP_112539.2	cleavage stimulation factor subunit 2 tau variant	16	65.8	7.25	-0.710756	3	3	194; 622; X	194; 622; X	8	8	3	194; 622; X
Cic	71722	755520084	XP_011248998.1	protein capicua homolog	100	258.2	8.02	-0.713119		2		290; 1826		2	2	290; 1826
Creb1	12912	19745144	NP_034082.1	cyclic AMP-responsive element-binding protein 1	15	36.7	5.57	-0.720232	2	1	136; 323	136	3	2	2	136; 323
Ahnak	66395	569007630	XP_006527317.1	neuroblast differentiation-associated protein AHNAK	790	596.6	6.32	-0.72261	59	87	129; 204; 245; 265; 503; 519; 633; 697; 816; 944; 996; 1053; 1065; 1183; 1267; 1309; 1319; 1328; 1384; 1391; 1445; 1504; 1519; 1561; 1612; 1628; 1708; 1761; 1764; 1885; 1892; 1903; 1966; 2228; 2239; 2302; 2369; 2380; 2497; 2508; 2556; 2818; 2825; 3024; 3065; 3277; 3898; 4169; 4303; 4559; 4616; 4637; 4640; 4948; 5045; 5050; 5329; 5453; X	129; 172; 184; 204; 245; 265; 393; 503; 519; 543; 633; 697; 762; 816; 890; 944; 996; 1011; 1053; 1065; 1076; 1081; 1139; 1183; 1193; 1252; 1260; 1267; 1309; 1319; 1328; 1384; 1391; 1445; 1504; 1519; 1561; 1582; 1628; 1697; 1708; 1761; 1764; 1823; 1885; 1892; 1903; 1966; 2228; 2302; 2369; 2380; 2428; 2497; 2508; 2556; 2818; 2825; 2869; 2890; 3017; 3024; 3065; 3086; 3270; 3277; 3898; 3964; 3967; 41…	127	226	91	129; 172; 184; 204; 245; 265; 393; 503; 519; 543; 633; 697; 762; 816; 890; 944; 996; 1011; 1053; 1065; 1076; 1081; 1139; 1183; 1193; 1252; 1260; 1267; 1309; 1319; 1328; 1384; 1391; 1445; 1504; 1519; 1561; 1582; 1612; 1628; 1697; 1708; 1761; 1764; 1823; 1885; 1892; 1903; 1966; 2228; 2239; 2302; 2369; 2380; 2428; 2497; 2508; 2556; 2818; 2825; 2869; 2890; 3017; 3024; 3065; 3086; 3270; 3277; 3898; 39…
Hnrnpc	15381	283436178	NP_001164453.1	heterogeneous nuclear ribonucleoproteins C1/C2	29	33	5.03	-0.72977	2	2	89; 163	89; 163	2	4	2	89; 163
Pspc1	66645	225543409	NP_079958.3	paraspeckle component 1	24	58.7	6.67	-0.72977		1		14		1	1	14
Baz2b	407823	755500130	XP_011237974.1	bromodomain adjacent to zinc finger domain protein 2B	191	241.7	6.58	-0.732165	2	2	1462; 1542	1462; 1530	2	2	3	1462; 1530; 1542
Acin1	56215	146231985	NP_075679.2	apoptotic chromatin condensation inducer in the nucleus	94	150.6	5.91	-0.746616	3	3	103; 831; 985	103; 831; 985	6	9	3	103; 831; 985
Setd2	235626	568963777	XP_006512150.1	histone-lysine N-methyltransferase SETD2	197	287.2	6.37	-0.75268	2	2	785; 1344	785; 1344	3	4	2	785; 1344
Mllt4	17356	568999211	XP_006523815.1	afadin	121	216.8	6.51	-0.753896	1	1	1734	1734	4	6	1	1734
Tcf20	21411	166706891	NP_001107612.1	transcription factor 20	119	215.6	8.98	-0.75877	1	1	861	861	1	2	1	861
Alms1	236266	568941707	XP_006506112.1	Alstrom syndrome protein 1 homolog	255	413.8	6.01	-0.75877	1	1	X	X	1	3	1	X
Sqstm1	18412	6754954	NP_035148.1	sequestosome-1	21	48.1	5.21	-0.76366	1	1	437	437	1	2	1	437
Ankrd11	77087	323423025	NP_001074848.2	ankyrin repeat domain-containing protein 11	315	296	6.98	-0.76366	1	1	385	385	1	2	1	385
Cstf2	108062	569011221	XP_006528541.1	cleavage stimulation factor subunit 2	13	66.3	7.08	-0.77596	3	3	189; 619; X	189; 619; X	7	8	3	189; 619; X
Hcfc1	15161	569009735	XP_006527898.1	host cell factor 1	72	214.9	6.89	-0.778432	3	4	665; 813; 836	665; 813; 820; 836	7	12	4	665; 813; 820; 836
Acin1	56215	568988260	XP_006519359.1	apoptotic chromatin condensation inducer in the nucleus	94	150.6	5.91	-0.804652	2	3	103; 984	103; 830; 984	2	7	3	103; 830; 984
Taf1	270627	595582247	NP_001277658.1	transcription initiation factor TFIID subunit 1	144	214.5	5.12	-0.804652	2	2	1348; 1556	1348; 1556	3	4	2	1348; 1556
Kmt2a	214162	755528511	XP_011240743.1	histone-lysine N-methyltransferase 2A	307	429.4	9.16	-0.828793	2	2	2345; 2360	311; 2360	2	5	3	311; 2345; 2360
Efhd2	27984	31981086	NP_080270.2	EF-hand domain-containing protein D2	22	26.8	5.14	-0.836501	1	1	197	197	2	2	1	197
Bop1	12181	7304931	NP_038509.1	ribosome biogenesis protein BOP1	30	82.5	6.28	-0.83908	2	1	283; 325	325	3	3	2	283; 325
Gm15142	100040899	149272514	XP_001475488.1	uncharacterized protein Gm15142	13	28.2	8.29	-0.875672	1	1	214	214	1	1	1	214
Rpl3	27367	255308899	NP_038790.2	60S ribosomal protein L3	56	46.1	10.21	-0.880976	1	1	366	373	1	1	2	366; 373
Nup93	71805	27369533	NP_765998.1	nuclear pore complex protein Nup93	40	93.2	5.72	-0.902389	1	1	59	59	2	2	1	59
Cpsf4	54188	568939038	XP_006504908.1	cleavage and polyadenylation specificity factor subunit 4	19	30.2	8.31	-0.92139		1		46		1	1	46
Smarcc2	68094	568968343	XP_006514083.1	SWI/SNF complex subunit SMARCC2	95	135.8	5.6	-0.9771		1		749		1	1	749
Nfrkb	235134	568959267	XP_006510281.1	nuclear factor related to kappa-B-binding protein	81	140.1	9.14	-0.979942	3	7	998; 1216; 1246	959; 991; 998; 1092; 1205; 1216; 1246	4	13	7	959; 991; 998; 1092; 1205; 1216; 1246
Igf2bp3	140488	225543383	NP_076159.3	insulin-like growth factor 2 mRNA-binding protein 3	47	63.5	8.87	-0.979942		1		280		2	1	280
Erh	13877	755542186	XP_011242297.1	enhancer of rudimentary homolog	8	16.6	5.59	-0.997117		1		145		2	1	145
Arid1a	93760	568932200	XP_006539388.1	AT-rich interactive domain-containing protein 1A	74	242.6	6.71	-1	2	1	1609; 1618	1618	2	2	2	1609; 1618
Sipa1l1	217692	755542450	XP_011242365.1	signal-induced proliferation-associated 1-like protein 1	108	198.5	8.13	-1.00578		1		831		2	1	831
Srrm2	75956	569001947	XP_006525139.1	serine/arginine repetitive matrix protein 2	137	294.7	12.03	-1.02327	2	4	1130; X	1130; 1164; 1357; X	9	13	4	1130; 1164; 1357; X
Nup214	227720	568913494	XP_006498008.1	nuclear pore complex protein Nup214	89	213	7.08	-1.02767	2	2	1079; 1155	1079; 1155	3	4	2	1079; 1155
Rangap1	19387	568991782	XP_006520709.1	ran GTPase-activating protein 1	39	68.7	4.6	-1.03505	1	2	63	63; 463	2	4	2	63; 463
Dhx9	13211	755493774	XP_011246220.1	ATP-dependent RNA helicase A	65	149.6	6.83	-1.03949	1	2	149	29; 149	2	3	2	29; 149
Cux1	13047	601984298	NP_001278162.1	protein CASP	104	175.3	6.06	-1.0514	2	2	484; 917	484; 917	3	4	2	484; 917
Ablim1	226251	157057145	NP_848803.3	actin-binding LIM protein 1	53	96.8	8.63	-1.05289	1	1	X	X	2	1	1	X
Cttn	13043	75677414	NP_031829.2	src substrate cortactin	50	61.2	5.4	-1.0862		4		161; 235; 255; 336		7	4	161; 235; 255; 336
Wdr36	225348	158517940	NP_001103485.1	WD repeat-containing protein 36	48	99.7	7.11	-1.09234	1	1	762	762	3	5	1	762
Ik	24010	33468955	NP_036009.1	protein Red	65	65.6	6.64	-1.10625	3	2	38; 164; 173	164; 173	9	8	3	38; 164; 173
Nol8	70930	406353182	NP_001258326.1	nucleolar protein 8	132	130.6	6.51	-1.13606	2	1	569; 1069	1069	3	4	2	569; 1069
Synpo	104027	569002906	XP_006525533.1	synaptopodin	37	121.7	9.73	-1.13924	1	1	391	391	2	2	1	391
Son	20658	124358955	NP_849211.3	protein SON	114	265.5	5.6	-1.14561	2	4	16; 284	16; 284; 2073; 2167	9	14	4	16; 284; 2073; 2167
Jun	16476	6754402	NP_034721.1	transcription factor AP-1	18	35.9	8.75	-1.15521	2	1	56; X	X	2	2	2	56; X
2210018M11Rik	233545	568950187	XP_006507678.1	protein EMSY	80	141.9	9.33	-1.16004	3	4	568; 612; 1072	568; 612; 670; 1072	4	8	4	568; 612; 670; 1072
G3bp1	27041	7305075	NP_038744.1	ras GTPase-activating protein-binding protein 1	19	51.8	5.59	-1.21424	2	2	76; 374	76; 374	2	4	2	76; 374
Yeats2	208146	568994852	XP_006521965.1	YEATS domain-containing protein 2	94	148.9	9.04	-1.21424	5	7	586; 647; 891; 1068; X	100; 459; 586; 647; 683; 891; 1068	12	16	8	100; 459; 586; 647; 683; 891; 1068; X
Ptbp1	19205	116517301	NP_001070831.1	polypyrimidine tract-binding protein 1	33	59.3	9.16	-1.25154	1	1	13	13	4	5	2	13; X
Zfp687	78266	27229259	NP_084350.1	zinc finger protein 687	67	130.3	8.12	-1.25154	3	4	439; 451; 1216	384; 439; 451; 1216	9	19	4	384; 439; 451; 1216
Kif11	16551	45476577	NP_034745.1	kinesin-like protein KIF11	88	118	6	-1.26882	1	1	476	476	2	4	1	476
Snrpe	20643	27883844	NP_033253.1	small nuclear ribonucleoprotein E	6	10.8	9.44	-1.26882		1		9		1	1	9
Prrc2a	53761	92110037	NP_064411.2	protein PRRC2A	99	229.1	9.39	-1.27753	1	2	49	49; 788	2	3	2	49; 788
Cirh1a	21771	163954951	NP_035704.2	cirhin	38	76.9	8.87	-1.2969	1	1	627	627	2	3	1	627
Ranbp2	19386	153792534	NP_035370.2	E3 SUMO-protein ligase RanBP2	257	340.9	6.18	-1.30757	8	12	982; 996; 1133; 1448; 1721; 2018; 2303; 2351	5; 982; 996; 1133; 1448; 1721; 1993; 2018; 2303; 2351; 2430; X	18	29	12	5; 982; 996; 1133; 1448; 1721; 1993; 2018; 2303; 2351; 2430; X
Nip7	66164	257153336	NP_079667.2	60S ribosome subunit biogenesis protein NIP7 homolog	13	20.4	8.24	-1.34008	1	1	62	62	1	2	1	62
Lin54	231506	568935518	XP_006534946.1	protein lin-54 homolog	55	81.4	9.04	-1.3752	1	2	375	165; 375	2	3	2	165; 375
Eif2s3x	26905	6753738	NP_036140.1	eukaryotic translation initiation factor 2 subunit 3, X-linked	36	51	8.4	-1.41889	1	1	27	27	2	2	1	27
Urb1	207932	256818750	NP_083773.1	nucleolar pre-ribosomal-associated protein 1	134	254.7	6.96	-1.44222	1	1	1582	1582	2	3	1	1582
Hist2h2aa2	319192	30061399	NP_835584.1	histone H2A type 2-A	14	14.1	10.9	-1.50226	1	2	X	119; X	2	4	2	119; X
Bcor	71458	269995967	NP_083786.2	BCL-6 corepressor	111	192.5	6.54	-1.56064	1	1	803	803	2	2	1	803
Coro1c	23790	31542413	NP_035909.2	coronin-1C	36	53.1	7.08	-1.57132	1	2	391	391; 403	1	2	2	391; 403
Flot2	14252	545746380	NP_001271156.1	flotillin-2	34	50.2	5.33	-1.57347		1		405		2	1	405
Arhgap21	71435	568912535	XP_006497601.1	rho GTPase-activating protein 21	126	217.5	7.83	-1.59946	1	1	287	287	3	5	1	287
Snrpa1	68981	228480232	NP_067311.4	U2 small nuclear ribonucleoprotein A'	21	28.3	8.62	-1.662	1	1	205	205	9	20	1	205
Zfp148	22661	755553520	XP_011244190.1	zinc finger protein 148	62	89.4	6.54	-1.70369	2	1	348; 427	348	2	1	2	348; 427
Cpsf2	51786	568980060	XP_006516134.1	cleavage and polyadenylation specificity factor subunit 2	57	88.3	5.11	-1.81858	1	2	611	324; 611	1	5	2	324; 611
Rprd2	75137	124486841	NP_001074762.1	regulation of nuclear pre-mRNA domain-containing protein 2	88	156.5	7.59	-1.89432		1		607		3	1	607
Eef1a1	13627	126032329	NP_034236.2	elongation factor 1-alpha 1	47	50.1	9.01	-1.91594	1		273		1		1	273
Sf3b2	319322	268837785	NP_084385.2	splicing factor 3B subunit 2	81	98.1	5.62	-1.92687	2	3	258; 263	258; 263; 469	3	10	3	258; 263; 469
Polr2a	20020	597517934	NP_001277997.1	DNA-directed RNA polymerase II subunit RPB1	105	217	7.37	-1.95176	1	1	992	992	6	8	1	992
Gar1	68147	13384710	NP_080854.1	H/ACA ribonucleoprotein complex subunit 1	12	23.5	11.02	-2.02327	1		161		1		1	161
Hp1bp3	15441	171846285	NP_001116369.1	heterochromatin protein 1-binding protein 3	78	60.8	9.7	-2.04097	1	1	29	29	1	1	1	29
Sin3a	20466	755529837	XP_011240987.1	paired amphipathic helix protein Sin3a	87	145.4	7.25	-2.15843		1		X		3	1	X
Kmt2c	231051	568933127	XP_006535745.1	histone-lysine N-methyltransferase 2C	277	547.6	6.54	-2.2723		1		4011		2	1	4011
Rreb1	68750	568981986	XP_006516815.1	ras-responsive element-binding protein 1	122	190	6.86	-2.27928		1		1512		1	1	1512
Ep400	75560	755512930	XP_011247885.1	E1A-binding protein p400	160	347.5	9.25	-2.28279	1	2	3034	1604; 3034	4	6	2	1604; 3034
Fus	233908	20982845	NP_631888.1	RNA-binding protein FUS	14	52.6	9.36	-2.4112	1	1	358	358	1	3	1	358
Abt1	30946	33468953	NP_038952.1	activator of basal transcription 1	24	30.6	10.01	-2.52284	1	1	255	255	1	1	1	255
Sin3b	20467	568956372	XP_006530852.1	paired amphipathic helix protein Sin3b	67	128.8	6.95	-2.62593	1		1021		1		1	1021
Lmo7	380928	568988017	XP_006519239.1	LIM domain only protein 7	110	201.7	6.39	-2.6529		1		1494		1	1	1494
Sipa1	20469	257153348	NP_001157952.1	signal-induced proliferation-associated protein 1	25	112.2	6.44	-2.7084		2		801; 1028		3	2	801; 1028
Ccdc174	232236	147899958	NP_766318.2	coiled-coil domain-containing protein 174	54	53.9	6.05	-2.9105	2	2	203; 369	203; 369	3	4	2	203; 369
Morc3	338467	255003723	NP_001038994.2	MORC family CW-type zinc finger protein 3	70	106.5	5.68	-3.02327	1		558		1		1	558
Nup88	19069	134053894	NP_001076800.1	nuclear pore complex protein Nup88	45	84.9	6.27	-3.03505	1		228		1		1	228
Rai1	19377	83649747	NP_033047.2	retinoic acid-induced protein 1	122	201.4	8.75	-3.09542	1	1	658	180	1	2	2	180; 658
Zfp512b	269401	257196177	NP_001158069.1	zinc finger protein 512B	91	95.3	9.77	-3.09542	1		305		1		1	305
Chd4	107932	568940125	XP_006505343.1	chromodomain-helicase-DNA-binding protein 4	176	221.4	5.97	-3.15843		2		1316; X		3	2	1316; X
Zbtb33	56805	118442830	NP_001072981.1	transcriptional regulator Kaiso	40	74	5.06	-3.17788	2	3	412; X	372; 412; X	3	12	3	372; 412; X
Myof	226101	569007058	XP_006527057.1	myoferlin	146	236.4	6.23	-3.18442		1		1365		2	1	1365
Pcbp2	18521	157041229	NP_001096635.1	poly(rC)-binding protein 2	17	38.2	6.79	-3.1976	1	1	306	306	1	1	1	306
Sh2d4a	72281	568955624	XP_006509814.1	SH2 domain-containing protein 4A	46	48.4	8.91	-3.23786		1		307		1	1	307
Rrp9	27966	21704248	NP_663595.1	U3 small nucleolar RNA-interacting protein 2	29	52.1	7.88	-3.26534	1	1	84	84	1	1	1	84
Ptbp3	230257	568926551	XP_006537914.1	polypyrimidine tract-binding protein 3	31	60	8.94	-3.26534							1	X
Ptbp2	56195	568923316	XP_006501794.1	polypyrimidine tract-binding protein 2	33	58	8.81	-3.26534	1	1	X	X	2	4	1	X
Tceb3	27224	31543847	NP_038764.2	transcription elongation factor B polypeptide 3	92	87.1	9.61	-3.42663	1		532		1		1	532
Smarcc1	20588	112421097	NP_033237.2	SWI/SNF complex subunit SMARCC1	80	122.8	5.73	-3.45008	2	2	591; 739	591; 739	2	2	2	591; 739
Junb	16477	6680512	NP_032442.1	transcription factor jun-B	19	35.7	9.22	-3.45008	2	2	36; 340	36; 340	9	11	2	36; 340
Prpf8	192159	115583687	NP_619600.2	pre-mRNA-processing-splicing factor 8	152	273.4	8.84	-3.45799	1	1	2049	2049	1	2	1	2049
Nr2f2	11819	45598394	NP_033827.2	COUP transcription factor 2	14	45.5	8.28	-3.47393	1		389		1		1	389
Nr2f6	13864	112807199	NP_034280.2	nuclear receptor subfamily 2 group F member 6	12	41.9	7.56	-3.47393	1		366		1		1	366
Bms1	213895	39930555	NP_919320.1	ribosome biogenesis protein BMS1 homolog	120	145.3	6.27	-3.49005	1		X		2		1	X
Eif4g1	208643	568994925	XP_006521999.1	eukaryotic translation initiation factor 4 gamma 1	96	176.1	5.4	-3.49005	1	1	1064	1064	1	2	1	1064
Mbd1	17190	569003386	XP_006525767.1	methyl-CpG-binding domain protein 1	43	70.7	8.68	-3.50635	1		451		1		1	451
Fosl2	14284	34328117	NP_032063.2	fos-related antigen 2	16	35.3	7.49	-3.55639	1	1	35	35	1	1	1	35
U2surp	67958	171460908	NP_080752.2	U2 snRNP-associated SURP motif-containing protein	105	113.2	8.35	-3.57347	1	3	38	38; 716; X	2	6	3	38; 716; X
Phf2	18676	31543476	NP_035208.2	lysine-specific demethylase PHF2	120	120.7	9.17	-3.68038		1		X		2	1	X
Smarca4	20586	291463269	NP_001167549.1	transcription activator BRG1	129	181.7	8.07	-3.71786	1	1	626	1342	1	1	2	626; 1342
Chmp5	76959	13386442	NP_084090.1	charged multivesicular body protein 5	24	24.6	4.79	-3.79586		1		100		1	1	100
Elf2	69257	12963705	NP_075991.1	ETS-related transcription factor Elf-2	41	63.2	6.42	-3.81604		1		460		1	1	460
Kmt2d	381022	359718904	NP_001028448.3	histone-lysine N-methyltransferase 2D	219	599.9	5.78	-3.87832	1	1	4516	4516	1	2	1	4516
Rsf1	233532	124486905	NP_001074736.1	remodeling and spacing factor 1	152	161.7	5.02	-3.9885		1		530		1	1	530
Zfp532	328977	569004086	XP_006526107.1	zinc finger protein 532	120	141.3	8.59	-4.03505	1	3	519	218; 445; 519	1	7	3	218; 445; 519
Cdkn2aip	70925	27369527	NP_765995.1	CDKN2A-interacting protein	47	59.7	9.16	-4.08314		1		367		2	1	367
Ncor1	20185	755537808	XP_011247132.1	nuclear receptor corepressor 1	145	278.7	7.2	-4.1078		1		1512		2	1	1512
Taf4b	72504	226958537	NP_001093919.1	TAF4B RNA polymerase II, TATA box binding protein (TBP)-associated factor	57	90	9.39	-4.1078	1	1	222	222	1	2	1	222
Ubn1	170644	71534247	NP_080942.1	ubinuclein-1	120	122.3	9.31	-4.32193	1	1	805	805	1	2	1	805
Cep192	70799	569004500	XP_006526305.1	centrosomal protein of 192 kDa	121	276.3	5.55	-4.4112		1		1182		2	1	1182
Med1	19014	121582398	NP_001073587.1	mediator of RNA polymerase II transcription subunit 1	124	167	8.73	-4.59074	1	2	1062	1062; 1076	1	4	2	1062; 1076
Atxn2l	233871	755522553	XP_011240077.1	ataxin-2-like protein	44	115.8	8.66	-4.79586		1		556		1	1	556
Magohb	66441	256985211	NP_079840.2	protein mago nashi homolog 2	13	17.3	6.39	-6.64386	1	1	43	43	2	2	1	43
Npm3	18150	6679110	NP_032749.1	nucleoplasmin-3	5	19	4.82	-6.64386		1		125		1	1	125
Nr2c2	22026	568941407	XP_006505965.1	nuclear receptor subfamily 2 group C member 2	30	68.8	6.24	-6.64386	2	4	96; 243	67; 96; 108; 243	2	7	4	67; 96; 108; 243
Tfap2a	21418	568982449	XP_006516962.1	transcription factor AP-2-alpha	21	52.4	9.07	-6.64386		1		242		2	1	242
Kdm6a	22289	569008692	XP_006527657.1	lysine-specific demethylase 6A	79	163	7.64	-6.64386		1		851		2	1	851
Epc2	227867	157042787	NP_766251.3	enhancer of polycomb homolog 2	55	90.9	8.73	-6.64386		1		760		1	1	760
Mcm3ap	54387	109627648	NP_062307.2	germinal-center associated nuclear protein	108	217.2	6.61	-6.64386		1		X		2	1	X
Edc4	234699	568956599	XP_006530964.1	enhancer of mRNA-decapping protein 4	54	152.5	5.82	-6.64386		1		X		2	1	X
Hnrnpa3	229279	157277969	NP_444493.1	heterogeneous nuclear ribonucleoprotein A3	20	37.1	8.31	#NUM!	1		129		1		1	129
Tpm2	22004	482677666	NP_001264805.1	tropomyosin beta chain	34	32.9	4.67	#NUM!		1		168		1	1	168
Vdac1	22333	6755963	NP_035824.1	voltage-dependent anion-selective channel protein 1	25	30.7	8.54	#NUM!		1		61		1	1	61
Cpsf6	432508	568967991	XP_006513916.1	cleavage and polyadenylation specificity factor subunit 6	19	63.5	7.97	#NUM!		1		173		1	1	173
Wdr46	57315	569020450	XP_006525494.1	WD repeat-containing protein 46	44	70.9	9.83	#NUM!	1		521		1		1	521
Asun	71177	133922586	NP_620096.2	protein asunder homolog	46	82.7	6.92	#NUM!		1		496		1	1	496
Specc1	432572	568974656	XP_006533719.1	cytospin-B	86	117	6.57	#NUM!		1		441		1	1	441
Psmc2	19181	33859604	NP_035318.1	26S protease regulatory subunit 7	36	52.8	6.28	#NUM!	1		76		1		1	76
Rbm15b	109095	241896855	NP_780611.3	putative RNA-binding protein 15B	42	97	9.91	#NUM!		1		210		1	1	210
Gltscr2	68077	228480230	NP_598592.2	glioma tumor suppressor candidate region gene 2 protein	44	55.8	10.35	#NUM!	1		85		1		1	85
Smarcd1	83797	125347396	NP_114030.2	SWI/SNF-related matrix-associated actin-dependent regulator of chromatin subfamily D member 1	32	58.2	9.25	#NUM!		1		101		1	1	101
Ccdc86	108673	165905619	NP_076220.2	coiled-coil domain-containing protein 86	37	46.5	9.64	#NUM!	1	1	48	48	2	1	1	48
Ckap2	80986	269315836	NP_001004140.2	cytoskeleton-associated protein 2	68	74	9.23	#NUM!	1		280		1		1	280
Usp48	170707	755509327	XP_006538661.2	ubiquitin carboxyl-terminal hydrolase 48	83	123.8	6.74	#NUM!	1		976		2		1	976
Cwc27	67285	755546467	XP_011242992.1	peptidyl-prolyl cis-trans isomerase CWC27 homolog	49	53.9	5.53	#NUM!	1		X		2		1	X
Foxk2	68837	755539510	XP_011247520.1	forkhead box protein K2	26	72.8	9.2	#NUM!		1		442		1	1	442
Pax9	18511	568979037	XP_006515644.1	paired box protein Pax-9	12	36.4	9.32	#NUM!		1		222		1	1	222
Snip1	76793	227430375	NP_780455.2	smad nuclear-interacting protein 1	25	44.4	9.89	#NUM!	1		210		1		1	210
Phc3	241915	568920912	XP_006535530.1	polyhomeotic-like protein 3	29	108.5	6.68	#NUM!		1		610		1	1	610
Meaf6	70088	568929712	XP_006503444.1	chromatin modification-related protein MEAF6	17	22.7	9.04	#NUM!		1		189		1	1	189
Phf20l1	239510	568992337	XP_006520979.1	PHD finger protein 20-like protein 1	102	114.4	7.27	#NUM!	1		285		1		1	285
Rfc1	19687	568933905	XP_006503863.1	replication factor C subunit 1	152	126	9.35	#NUM!	1		5		1		1	5
Akap1	11640	110347477	NP_001036006.1	A-kinase anchor protein 1, mitochondrial	43	92.1	5.02	#NUM!	1		387		1		1	387
Erbb2ip	59079	54607114	NP_001005868.1	protein LAP2	84	162.1	5.86	#NUM!		1		879		1	1	879
Trip4	56404	755530307	XP_011241080.1	activating signal cointegrator 1	49	66.2	7.55	#NUM!		1		128		1	1	128
Zcwpw1	381678	254553414	NP_001005426.2	zinc finger CW-type PWWP domain protein 1	73	70.5	5.45	#NUM!	1		555		1		1	555
Snx16	74718	187831285	NP_083344.3	sorting nexin-16	18	38.8	5.21	#NUM!		1		76		1	1	76
Pcm1	18536	568954577	XP_006509361.1	pericentriolar material 1 protein	130	232.7	4.97	#NUM!	1		1393		1		1	1393
Cbx2	12416	568971406	XP_006532166.1	chromobox protein homolog 2	45	62.3	9.82	#NUM!	1		315		1		1	315
Prkrip1	66801	13385244	NP_080050.1	PRKR-interacting protein 1	26	21.5	9.42	#NUM!	1		51		1		1	51

## Sheet: Peptide Level View
Gene symbol	Gene ID	Database ID	RefSeq Accession	Protein Description	# Lysines	Annotated Sequence	Peptide Sequence	Peptide Modifications	m/z [Da]	Charge	Protein Positions	# Missed Cleavages	Peptide Window	Master Protein Accessions	m6A-tracer-BioID w/ DAM-LMNB1 Shield(-)_REP1.raw - #Biotin sites	m6A-tracer-BioID w/ DAM-LMNB1 Shield(-)_REP2.raw - #Biotin sites	m6A-tracer-BioID w/ DAM-LMNB1 Shield(+)_REP1.raw - #Biotin sites	m6A-tracer-BioID w/ DAM-LMNB1 Shield(+)_REP2.raw - #Biotin sites	m6A-tracer-BioID w/ DAM-LMNB1 Shield(-)_REP1.raw - m/z [Da]	m6A-tracer-BioID w/ DAM-LMNB1 Shield(-)_REP2.raw - m/z [Da]	m6A-tracer-BioID w/ DAM-LMNB1 Shield(+)_REP1.raw - m/z [Da]	m6A-tracer-BioID w/ DAM-LMNB1 Shield(+)_REP2.raw - m/z [Da]	m6A-tracer-BioID w/ DAM-LMNB1 Shield(-)_REP1.raw - Charge	m6A-tracer-BioID w/ DAM-LMNB1 Shield(-)_REP2.raw - Charge	m6A-tracer-BioID w/ DAM-LMNB1 Shield(+)_REP1.raw - Charge	m6A-tracer-BioID w/ DAM-LMNB1 Shield(+)_REP2.raw - Charge	m6A-tracer-BioID w/ DAM-LMNB1 Shield(-)_REP1.raw - #PSMs	m6A-tracer-BioID w/ DAM-LMNB1 Shield(-)_REP2.raw - #PSMs	m6A-tracer-BioID w/ DAM-LMNB1 Shield(+)_REP1.raw - #PSMs	m6A-tracer-BioID w/ DAM-LMNB1 Shield(+)_REP2.raw - #PSMs	m6A-tracer-BioID w/ DAM-LMNB1 Shield(-)_REP1.raw - Abundance	m6A-tracer-BioID w/ DAM-LMNB1 Shield(-)_REP2.raw - Abundance	m6A-tracer-BioID w/ DAM-LMNB1 Shield(+)_REP1.raw - Abundance	m6A-tracer-BioID w/ DAM-LMNB1 Shield(+)_REP2.raw - Abundance	m6A-tracer-BioID w/ DAM-LMNB1 Shield(-) - #PSMs	m6A-tracer-BioID w/ DAM-LMNB1 Shield(+) - #PSMs	m6A-tracer-BioID w/ DAM-LMNB1 Shield(+) - Biotin sites	m6A-tracer-BioID w/ DAM-LMNB1 Shield(+) - Total #PSMs	m6A-tracer-BioID w/ DAM-LMNB1 Shield(+) - #Biotin sites	m6A-tracer-BioID w/ DAM-LMNB1 Shield(-) - Biotin sites	m6A-tracer-BioID w/ DAM-LMNB1 Shield(-) - Total #PSMs	m6A-tracer-BioID w/ DAM-LMNB1 Shield(-) - #Biotin sites
Plec	18810	254675265	NP_958796.2	plectin isoform 1a [Mus musculus]	262	[K].ATVSAPFGKFQGR.[T]	ATVSAPFGkFQGR	[K9](Biotin)	796.409	2	2912	1	TVSAPFGkFQGRTVT	254675265	1	1	1	1	796.409	796.404	796.408	796.405	2	2	2	2	1	1	1	1	451142	461553	468043	479400	2	2	430; 1578; 1585; 2424; 2496; 2912; 4468	17	7	430; 1578; 1585; 2424; 2469; 2490; 2496; 2912; 3317; 4468	31	10
Plec	18810	254675265	NP_958796.2	plectin isoform 1a [Mus musculus]	262	[K].SEEMQTVQQEQILQETQALQKSFLSEKDSLLQR.[E]	SEEMQTVQQEQILQETQALQkSFLSEKDSLLQR	[K21](Biotin)	1034.51	4	2490	2	QETQALQkSFLSEKD	254675265	1	1	0	0	1034.51	1030.52			4	4			2	1	0	0	141354	131530	0	0	3	0	430; 1578; 1585; 2424; 2496; 2912; 4468	17	7	430; 1578; 1585; 2424; 2469; 2490; 2496; 2912; 3317; 4468	31	10
Plec	18810	254675265	NP_958796.2	plectin isoform 1a [Mus musculus]	262	[R].SAEVELQSKR.[A]	SAEVELQSkR	[K9](Biotin)	686.848	2	1578	1	AEVELQSkRASFAEK	254675265	1	1	1	1	686.848	686.848	686.847	686.847	2	2	2	2	1	1	1	1	789788	476052	542470	553743	2	2	430; 1578; 1585; 2424; 2496; 2912; 4468	17	7	430; 1578; 1585; 2424; 2469; 2490; 2496; 2912; 3317; 4468	31	10
Plec	18810	254675265	NP_958796.2	plectin isoform 1a [Mus musculus]	262	[R].LLEAAAQSSKGYYSPYSVSGSGSTAGSR.[T]	LLEAAAQSSkGYYSPYSVSGSGSTAGSR	[K10](Biotin)	1003.14	3	4468	1	EAAAQSSkGYYSPYS	254675265	1	1	1	1	1003.14	1003.14	1003.14	1003.14	3	3	3	3	1	1	1	1	817654	938696	739542	755167	2	2	430; 1578; 1585; 2424; 2496; 2912; 4468	17	7	430; 1578; 1585; 2424; 2469; 2490; 2496; 2912; 3317; 4468	31	10
Plec	18810	254675265	NP_958796.2	plectin isoform 1a [Mus musculus]	262	[R].LLASGKVAQR.[A]	LLASGkVAQR	[K6](Biotin)	634.861	2	430	1	IRLLASGkVAQRAGE	254675265	1	1	1	1	634.86	634.861	634.86	634.861	2	2	2	2	1	2	1	2	3718293	2.36584e+06	2336983	2.53128e+06	3	3	430; 1578; 1585; 2424; 2496; 2912; 4468	17	7	430; 1578; 1585; 2424; 2469; 2490; 2496; 2912; 3317; 4468	31	10
Plec	18810	254675265	NP_958796.2	plectin isoform 1a [Mus musculus]	262	[R].ASFAEKTAQLER.[T]	ASFAEkTAQLER	[K6](Biotin)	788.893	3	1585	1	KRASFAEkTAQLERT	254675265	1	1	1	1	788.893	788.893	526.265	526.265	2	2	3	3	2	2	1	1	1.86733e+06	1.69973e+06	566935	424261	4	2	430; 1578; 1585; 2424; 2496; 2912; 4468	17	7	430; 1578; 1585; 2424; 2469; 2490; 2496; 2912; 3317; 4468	31	10
Plec	18810	254675265	NP_958796.2	plectin isoform 1a [Mus musculus]	262	[K].RASFAEKTAQLER.[T]	RASFAEkTAQLER	[K7](Biotin)	578.299	3	1585	2	KRASFAEkTAQLERT	254675265	1	1	1	1	578.298	578.299	578.298	578.298	3	3	3	3	2	1	1	1	1.50368e+06	1.05247e+06	955700	852369	3	2	430; 1578; 1585; 2424; 2496; 2912; 4468	17	7	430; 1578; 1585; 2424; 2469; 2490; 2496; 2912; 3317; 4468	31	10
Plec	18810	254675265	NP_958796.2	plectin isoform 1a [Mus musculus]	262	[R].APVPASELLDAKILSR.[A]	APVPASELLDAkILSR	[K12](Biotin)	636.021	3	3317	1	ASELLDAkILSRAQF	254675265	1	1	0	0	636.021	636.02			3	3			1	1	0	0	53524.3	35217.2	0	0	2	0	430; 1578; 1585; 2424; 2496; 2912; 4468	17	7	430; 1578; 1585; 2424; 2469; 2490; 2496; 2912; 3317; 4468	31	10
Plec	18810	254675265	NP_958796.2	plectin isoform 1a [Mus musculus]	262	[K].SFLSEKDSLLQR.[E]	SFLSEkDSLLQR	[K6](Biotin)	824.925	3	2496	1	QKSFLSEkDSLLQRE	254675265	1	1	1	1	824.923	824.922	824.925	550.285	2	2	2	3	2	2	2	1	362449	250407	197659	71887.5	4	3	430; 1578; 1585; 2424; 2496; 2912; 4468	17	7	430; 1578; 1585; 2424; 2469; 2490; 2496; 2912; 3317; 4468	31	10
Plec	18810	254675265	NP_958796.2	plectin isoform 1a [Mus musculus]	262	[R].TELATQEKVTLVQTLEIQR.[Q]	TELATQEkVTLVQTLEIQR	[K8](Biotin)	809.439	3	2424	1	TELATQEkVTLVQTL	254675265	1	1	0	1	809.437	809.437		809.439	3	3		3	1	1	0	1	157295	97776.1	0	222252	2	1	430; 1578; 1585; 2424; 2496; 2912; 4468	17	7	430; 1578; 1585; 2424; 2469; 2490; 2496; 2912; 3317; 4468	31	10
Plec	18810	254675265	NP_958796.2	plectin isoform 1a [Mus musculus]	262	[K].SEEMQTVQQEQILQETQALQKSFLSEKDSLLQR.[E]	SEEMQTVQQEQILQETQALQkSFLSEKDSLLQR	[K21](Biotin)	1034.51	4	2490	2	QETQALQkSFLSEKD	254675265	1	1	0	0	1034.51	1030.52			4	4			2	1	0	0	141354	131530	0	0	3	0	430; 1578; 1585; 2424; 2496; 2912; 4468	17	7	430; 1578; 1585; 2424; 2469; 2490; 2496; 2912; 3317; 4468	31	10
Plec	18810	254675265	NP_958796.2	plectin isoform 1a [Mus musculus]	262	[K].LLQLKSEEMQTVQQEQILQETQALQK.[S]	LLQLkSEEMQTVQQEQILQETQALQK	[K5](Biotin)	1104.24	3	2469	1	EAKLLQLkSEEMQTV	254675265	1	0	0	0	1104.24				3				1	0	0	0	83617.6	0	0	0	1	0	430; 1578; 1585; 2424; 2496; 2912; 4468	17	7	430; 1578; 1585; 2424; 2469; 2490; 2496; 2912; 3317; 4468	31	10
Plec	18810	254675115	NP_001157012.1	plectin isoform 12alpha [Mus musculus]	264	[K].ATVSAPFGKFQGR.[T]	ATVSAPFGkFQGR	[K9](Biotin)	796.409	2	3060	1	TVSAPFGkFQGRTVT	254675115	1	1	1	1	796.409	796.404	796.408	796.405	2	2	2	2	1	1	1	1	451142	461553	468043	479400	2	2	578; 1726; 1733; 2572; 2644; 3060; 4616	17	7	578; 1726; 1733; 2572; 2617; 2638; 2644; 3060; 3465; 4616	31	10
Plec	18810	254675115	NP_001157012.1	plectin isoform 12alpha [Mus musculus]	264	[K].SEEMQTVQQEQILQETQALQKSFLSEKDSLLQR.[E]	SEEMQTVQQEQILQETQALQkSFLSEKDSLLQR	[K21](Biotin)	1034.51	4	2638	2	QETQALQkSFLSEKD	254675115	1	1	0	0	1034.51	1030.52			4	4			2	1	0	0	141354	131530	0	0	3	0	578; 1726; 1733; 2572; 2644; 3060; 4616	17	7	578; 1726; 1733; 2572; 2617; 2638; 2644; 3060; 3465; 4616	31	10
Plec	18810	254675115	NP_001157012.1	plectin isoform 12alpha [Mus musculus]	264	[R].SAEVELQSKR.[A]	SAEVELQSkR	[K9](Biotin)	686.848	2	1726	1	AEVELQSkRASFAEK	254675115	1	1	1	1	686.848	686.848	686.847	686.847	2	2	2	2	1	1	1	1	789788	476052	542470	553743	2	2	578; 1726; 1733; 2572; 2644; 3060; 4616	17	7	578; 1726; 1733; 2572; 2617; 2638; 2644; 3060; 3465; 4616	31	10
Plec	18810	254675115	NP_001157012.1	plectin isoform 12alpha [Mus musculus]	264	[R].LLEAAAQSSKGYYSPYSVSGSGSTAGSR.[T]	LLEAAAQSSkGYYSPYSVSGSGSTAGSR	[K10](Biotin)	1003.14	3	4616	1	EAAAQSSkGYYSPYS	254675115	1	1	1	1	1003.14	1003.14	1003.14	1003.14	3	3	3	3	1	1	1	1	817654	938696	739542	755167	2	2	578; 1726; 1733; 2572; 2644; 3060; 4616	17	7	578; 1726; 1733; 2572; 2617; 2638; 2644; 3060; 3465; 4616	31	10
Plec	18810	254675115	NP_001157012.1	plectin isoform 12alpha [Mus musculus]	264	[R].LLASGKVAQR.[A]	LLASGkVAQR	[K6](Biotin)	634.861	2	578	1	IRLLASGkVAQRAGE	254675115	1	1	1	1	634.86	634.861	634.86	634.861	2	2	2	2	1	2	1	2	3718293	2.36584e+06	2336983	2.53128e+06	3	3	578; 1726; 1733; 2572; 2644; 3060; 4616	17	7	578; 1726; 1733; 2572; 2617; 2638; 2644; 3060; 3465; 4616	31	10
Plec	18810	254675115	NP_001157012.1	plectin isoform 12alpha [Mus musculus]	264	[R].ASFAEKTAQLER.[T]	ASFAEkTAQLER	[K6](Biotin)	788.893	3	1733	1	KRASFAEkTAQLERT	254675115	1	1	1	1	788.893	788.893	526.265	526.265	2	2	3	3	2	2	1	1	1.86733e+06	1.69973e+06	566935	424261	4	2	578; 1726; 1733; 2572; 2644; 3060; 4616	17	7	578; 1726; 1733; 2572; 2617; 2638; 2644; 3060; 3465; 4616	31	10
Plec	18810	254675115	NP_001157012.1	plectin isoform 12alpha [Mus musculus]	264	[K].RASFAEKTAQLER.[T]	RASFAEkTAQLER	[K7](Biotin)	578.299	3	1733	2	KRASFAEkTAQLERT	254675115	1	1	1	1	578.298	578.299	578.298	578.298	3	3	3	3	2	1	1	1	1.50368e+06	1.05247e+06	955700	852369	3	2	578; 1726; 1733; 2572; 2644; 3060; 4616	17	7	578; 1726; 1733; 2572; 2617; 2638; 2644; 3060; 3465; 4616	31	10
Plec	18810	254675115	NP_001157012.1	plectin isoform 12alpha [Mus musculus]	264	[R].APVPASELLDAKILSR.[A]	APVPASELLDAkILSR	[K12](Biotin)	636.021	3	3465	1	ASELLDAkILSRAQF	254675115	1	1	0	0	636.021	636.02			3	3			1	1	0	0	53524.3	35217.2	0	0	2	0	578; 1726; 1733; 2572; 2644; 3060; 4616	17	7	578; 1726; 1733; 2572; 2617; 2638; 2644; 3060; 3465; 4616	31	10
Plec	18810	254675115	NP_001157012.1	plectin isoform 12alpha [Mus musculus]	264	[K].SFLSEKDSLLQR.[E]	SFLSEkDSLLQR	[K6](Biotin)	824.925	3	2644	1	QKSFLSEkDSLLQRE	254675115	1	1	1	1	824.923	824.922	824.925	550.285	2	2	2	3	2	2	2	1	362449	250407	197659	71887.5	4	3	578; 1726; 1733; 2572; 2644; 3060; 4616	17	7	578; 1726; 1733; 2572; 2617; 2638; 2644; 3060; 3465; 4616	31	10
Plec	18810	254675115	NP_001157012.1	plectin isoform 12alpha [Mus musculus]	264	[R].TELATQEKVTLVQTLEIQR.[Q]	TELATQEkVTLVQTLEIQR	[K8](Biotin)	809.439	3	2572	1	TELATQEkVTLVQTL	254675115	1	1	0	1	809.437	809.437		809.439	3	3		3	1	1	0	1	157295	97776.1	0	222252	2	1	578; 1726; 1733; 2572; 2644; 3060; 4616	17	7	578; 1726; 1733; 2572; 2617; 2638; 2644; 3060; 3465; 4616	31	10
Plec	18810	254675115	NP_001157012.1	plectin isoform 12alpha [Mus musculus]	264	[K].SEEMQTVQQEQILQETQALQKSFLSEKDSLLQR.[E]	SEEMQTVQQEQILQETQALQkSFLSEKDSLLQR	[K21](Biotin)	1034.51	4	2638	2	QETQALQkSFLSEKD	254675115	1	1	0	0	1034.51	1030.52			4	4			2	1	0	0	141354	131530	0	0	3	0	578; 1726; 1733; 2572; 2644; 3060; 4616	17	7	578; 1726; 1733; 2572; 2617; 2638; 2644; 3060; 3465; 4616	31	10
Plec	18810	254675115	NP_001157012.1	plectin isoform 12alpha [Mus musculus]	264	[K].LLQLKSEEMQTVQQEQILQETQALQK.[S]	LLQLkSEEMQTVQQEQILQETQALQK	[K5](Biotin)	1104.24	3	2617	1	EAKLLQLkSEEMQTV	254675115	1	0	0	0	1104.24				3				1	0	0	0	83617.6	0	0	0	1	0	578; 1726; 1733; 2572; 2644; 3060; 4616	17	7	578; 1726; 1733; 2572; 2617; 2638; 2644; 3060; 3465; 4616	31	10
Vim	22352	31982755	NP_035831.2	vimentin [Mus musculus]	22	[R].TLLIKTVETRDGQVINETSQHHDDLE.[-]	TLLIkTVETRDGQVINETSQHHDDLE	[K5](Biotin)	1073.2	4	445	2	SKRTLLIkTVETRDG	31982755	1	1	1	1	1073.2	805.151	805.151	805.151	3	4	4	4	2	1	1	1	3.22866e+06	2357671	1.86457e+06	2653941	3	2	143; 294; 439; 445	32	4	294; 439; 445	39	3
Vim	22352	31982755	NP_035831.2	vimentin [Mus musculus]	22	[K].RTLLIKTVETR.[D]	RTLLIkTVETR	[K6](Biotin)	778.453	3	445	2	SKRTLLIkTVETRDG	31982755	1	1	1	1	519.305	778.453	519.305	519.305	3	2	3	3	2	2	2	2	27212743	15090477	1.58153e+07	1.65066e+07	4	4	143; 294; 439; 445	32	4	294; 439; 445	39	3
Vim	22352	31982755	NP_035831.2	vimentin [Mus musculus]	22	[R].TLLIKTVETR.[D]	TLLIkTVETR	[K5](Biotin)	700.404	3	445	1	SKRTLLIkTVETRDG	31982755	1	1	1	1	700.404	700.403	467.272	700.404	2	2	3	2	12	12	10	8	2.05827e+08	3.36009e+08	2.768e+08	312137277	24	18	143; 294; 439; 445	32	4	294; 439; 445	39	3
Vim	22352	31982755	NP_035831.2	vimentin [Mus musculus]	22	[K].SKFADLSEAANRNNDALR.[Q]	SkFADLSEAANRNNDALR	[K2](Biotin)	740.03	3	294	2	AEEWYKSkFADLSEA	31982755	1	1	1	0	740.028	740.027	740.03		3	3	3		1	1	1	0	396149	268632	280809	0	2	1	143; 294; 439; 445	32	4	294; 439; 445	39	3
Vim	22352	31982755	NP_035831.2	vimentin [Mus musculus]	22	[R].ETNLESLPLVDTHSKR.[T]	ETNLESLPLVDTHSkR	[K15](Biotin)	689.019	3	439	1	PLVDTHSkRTLLIKT	31982755	1	1	1	1	689.018	689.019	689.017	689.018	3	3	3	3	3	3	3	2	6.14152e+07	4.13916e+07	4.41231e+07	32296692	6	5	143; 294; 439; 445	32	4	294; 439; 445	39	3
Vim	22352	31982755	NP_035831.2	vimentin [Mus musculus]	22	[K].ILLAELEQLKGQGKSR.[L]	ILLAELEQLKGQGkSR	[K14](Biotin)	670.379	3	143	2	EQLKGQGkSRLGDLY	31982755	0	0	1	0			670.379				3		0	0	1	0	0	0	89365.6	0	0	1	143; 294; 439; 445	32	4	294; 439; 445	39	3
Vim	22352	31982755	NP_035831.2	vimentin [Mus musculus]	22	[K].RTLLIKTVETRDGQVINETSQHHDDLE.[-]	RTLLIkTVETRDGQVINETSQHHDDLE	[K6](Biotin)	844.176	4	445	3	SKRTLLIkTVETRDG	31982755	0	0	0	1				844.176				4	0	0	0	1	0	0	0	271907	0	1	143; 294; 439; 445	32	4	294; 439; 445	39	3
Vim	22352	31982755	NP_035831.2	vimentin [Mus musculus]	22	[R].TNEKVELQELNDRFANYIDKVR.[F]	TNEKVELQELNDRFANYIDKVR	[K](Biotin)			X	3
Ahnak	66395	569007630	XP_006527317.1	neuroblast differentiation-associated protein AHNAK isoform X2 [Mus musculus]	790	[K].FKMPDMHFKTPK.[I]	FKMPDMHFkTPK	[K9](Biotin)	433.965	4	1761	2	KMPDMHFkTPKISMP	569007630	1	1	1	0	433.964	433.965	433.965		4	4	4		1	1	1	0	96793.9	122260	185495	0	2	1	129; 204; 245; 265; 503; 519; 633; 697; 816; 944; 996; 1053; 1065; 1183; 1267; 1309; 1319; 1328; 1384; 1391; 1445; 1504; 1519; 1561; 1612; 1628; 1708; 1761; 1764; 1885; 1892; 1903; 1966; 2228; 2239; 2302; 2369; 2380; 2497; 2508; 2556; 2818; 2825; 3024; 3065; 3277; 3898; 4169; 4303; 4559; 4616; 4637; 4640; 4948; 5045; 5050; 5329; 5453	119	58	129; 172; 184; 204; 245; 265; 393; 503; 519; 543; 633; 697; 762; 816; 890; 944; 996; 1011; 1053; 1065; 1076; 1081; 1139; 1183; 1193; 1252; 1260; 1267; 1309; 1319; 1328; 1384; 1391; 1445; 1504; 1519; 1561; 1582; 1628; 1697; 1708; 1761; 1764; 1823; 1885; 1892; 1903; 1966; 2228; 2302; 2369; 2380; 2428; 2497; 2508; 2556; 2818; 2825; 2869; 2890; 3017; 3024; 3065; 3086; 3270; 3277; 3898; 3964; 3967; 41…	199	86
Ahnak	66395	569007630	XP_006527317.1	neuroblast differentiation-associated protein AHNAK isoform X2 [Mus musculus]	790	[K].IKFPKFSLPK.[I]	IKFPkFSLPK	[K5](Biotin)	477.612	3	4948	2	EGKIKFPkFSLPKIS	569007630	0	0	1	0			477.612				3		0	0	1	0	0	0	125797	0	0	1	129; 204; 245; 265; 503; 519; 633; 697; 816; 944; 996; 1053; 1065; 1183; 1267; 1309; 1319; 1328; 1384; 1391; 1445; 1504; 1519; 1561; 1612; 1628; 1708; 1761; 1764; 1885; 1892; 1903; 1966; 2228; 2239; 2302; 2369; 2380; 2497; 2508; 2556; 2818; 2825; 3024; 3065; 3277; 3898; 4169; 4303; 4559; 4616; 4637; 4640; 4948; 5045; 5050; 5329; 5453	119	58	129; 172; 184; 204; 245; 265; 393; 503; 519; 543; 633; 697; 762; 816; 890; 944; 996; 1011; 1053; 1065; 1076; 1081; 1139; 1183; 1193; 1252; 1260; 1267; 1309; 1319; 1328; 1384; 1391; 1445; 1504; 1519; 1561; 1582; 1628; 1697; 1708; 1761; 1764; 1823; 1885; 1892; 1903; 1966; 2228; 2302; 2369; 2380; 2428; 2497; 2508; 2556; 2818; 2825; 2869; 2890; 3017; 3024; 3065; 3086; 3270; 3277; 3898; 3964; 3967; 41…	199	86
Ahnak	66395	569007630	XP_006527317.1	neuroblast differentiation-associated protein AHNAK isoform X2 [Mus musculus]	790	[K].FKMPEVNIKAPK.[I]	FkMPEVNIKAPK	[K2](Biotin)	543.294	3	2869	2	KLKGPKFkMPEVNIK	569007630	1	0	0	0	543.294				3				1	0	0	0	94212	0	0	0	1	0	129; 204; 245; 265; 503; 519; 633; 697; 816; 944; 996; 1053; 1065; 1183; 1267; 1309; 1319; 1328; 1384; 1391; 1445; 1504; 1519; 1561; 1612; 1628; 1708; 1761; 1764; 1885; 1892; 1903; 1966; 2228; 2239; 2302; 2369; 2380; 2497; 2508; 2556; 2818; 2825; 3024; 3065; 3277; 3898; 4169; 4303; 4559; 4616; 4637; 4640; 4948; 5045; 5050; 5329; 5453	119	58	129; 172; 184; 204; 245; 265; 393; 503; 519; 543; 633; 697; 762; 816; 890; 944; 996; 1011; 1053; 1065; 1076; 1081; 1139; 1183; 1193; 1252; 1260; 1267; 1309; 1319; 1328; 1384; 1391; 1445; 1504; 1519; 1561; 1582; 1628; 1697; 1708; 1761; 1764; 1823; 1885; 1892; 1903; 1966; 2228; 2302; 2369; 2380; 2428; 2497; 2508; 2556; 2818; 2825; 2869; 2890; 3017; 3024; 3065; 3086; 3270; 3277; 3898; 3964; 3967; 41…	199	86
Ahnak	66395	569007630	XP_006527317.1	neuroblast differentiation-associated protein AHNAK isoform X2 [Mus musculus]	790	[K].APKISMPDLHLK.[G]	APkISMPDLHLK	[K3](Biotin)	525.951	3	1319	1	EMNIKAPkISMPDLH	569007630	1	0	0	0	525.951				3				1	0	0	0	344001	0	0	0	1	0	129; 204; 245; 265; 503; 519; 633; 697; 816; 944; 996; 1053; 1065; 1183; 1267; 1309; 1319; 1328; 1384; 1391; 1445; 1504; 1519; 1561; 1612; 1628; 1708; 1761; 1764; 1885; 1892; 1903; 1966; 2228; 2239; 2302; 2369; 2380; 2497; 2508; 2556; 2818; 2825; 3024; 3065; 3277; 3898; 4169; 4303; 4559; 4616; 4637; 4640; 4948; 5045; 5050; 5329; 5453	119	58	129; 172; 184; 204; 245; 265; 393; 503; 519; 543; 633; 697; 762; 816; 890; 944; 996; 1011; 1053; 1065; 1076; 1081; 1139; 1183; 1193; 1252; 1260; 1267; 1309; 1319; 1328; 1384; 1391; 1445; 1504; 1519; 1561; 1582; 1628; 1697; 1708; 1761; 1764; 1823; 1885; 1892; 1903; 1966; 2228; 2302; 2369; 2380; 2428; 2497; 2508; 2556; 2818; 2825; 2869; 2890; 3017; 3024; 3065; 3086; 3270; 3277; 3898; 3964; 3967; 41…	199	86
Ahnak	66395	569007630	XP_006527317.1	neuroblast differentiation-associated protein AHNAK isoform X2 [Mus musculus]	790	[K].LKGPKFKVPDVQFK.[T]	LKGPKFKVPDVQFK	[K](Biotin)			X	3
Ahnak	66395	569007630	XP_006527317.1	neuroblast differentiation-associated protein AHNAK isoform X2 [Mus musculus]	790	[K].GPKVEAPDVEVHGPDWHLK.[M]	GPkVEAPDVEVHGPDWHLK	[K3](Biotin)	584.794	4	1612	1	AVDIKGPkVEAPDVE	569007630	0	0	1	0			584.794				4		0	0	1	0	0	0	166504	0	0	1	129; 204; 245; 265; 503; 519; 633; 697; 816; 944; 996; 1053; 1065; 1183; 1267; 1309; 1319; 1328; 1384; 1391; 1445; 1504; 1519; 1561; 1612; 1628; 1708; 1761; 1764; 1885; 1892; 1903; 1966; 2228; 2239; 2302; 2369; 2380; 2497; 2508; 2556; 2818; 2825; 3024; 3065; 3277; 3898; 4169; 4303; 4559; 4616; 4637; 4640; 4948; 5045; 5050; 5329; 5453	119	58	129; 172; 184; 204; 245; 265; 393; 503; 519; 543; 633; 697; 762; 816; 890; 944; 996; 1011; 1053; 1065; 1076; 1081; 1139; 1183; 1193; 1252; 1260; 1267; 1309; 1319; 1328; 1384; 1391; 1445; 1504; 1519; 1561; 1582; 1628; 1697; 1708; 1761; 1764; 1823; 1885; 1892; 1903; 1966; 2228; 2302; 2369; 2380; 2428; 2497; 2508; 2556; 2818; 2825; 2869; 2890; 3017; 3024; 3065; 3086; 3270; 3277; 3898; 3964; 3967; 41…	199	86
Ahnak	66395	569007630	XP_006527317.1	neuroblast differentiation-associated protein AHNAK isoform X2 [Mus musculus]	790	[K].ISMPDLHLKGPK.[V]	ISMPDLHLkGPK	[K9](Biotin)	781.417	3	1328	1	SMPDLHLkGPKVKGD	569007630	1	1	1	1	781.416	521.278	781.417	521.28	2	3	2	3	2	1	2	1	732520	501443	709504	435301	3	3	129; 204; 245; 265; 503; 519; 633; 697; 816; 944; 996; 1053; 1065; 1183; 1267; 1309; 1319; 1328; 1384; 1391; 1445; 1504; 1519; 1561; 1612; 1628; 1708; 1761; 1764; 1885; 1892; 1903; 1966; 2228; 2239; 2302; 2369; 2380; 2497; 2508; 2556; 2818; 2825; 3024; 3065; 3277; 3898; 4169; 4303; 4559; 4616; 4637; 4640; 4948; 5045; 5050; 5329; 5453	119	58	129; 172; 184; 204; 245; 265; 393; 503; 519; 543; 633; 697; 762; 816; 890; 944; 996; 1011; 1053; 1065; 1076; 1081; 1139; 1183; 1193; 1252; 1260; 1267; 1309; 1319; 1328; 1384; 1391; 1445; 1504; 1519; 1561; 1582; 1628; 1697; 1708; 1761; 1764; 1823; 1885; 1892; 1903; 1966; 2228; 2302; 2369; 2380; 2428; 2497; 2508; 2556; 2818; 2825; 2869; 2890; 3017; 3024; 3065; 3086; 3270; 3277; 3898; 3964; 3967; 41…	199	86
Ahnak	66395	569007630	XP_006527317.1	neuroblast differentiation-associated protein AHNAK isoform X2 [Mus musculus]	790	[K].AKGLDLGGK.[G]	AkGLDLGGK	[K2](Biotin)	542.796	2	265	1	LDVNVKAkGLDLGGK	569007630	1	0	1	0	542.796		542.795		2		2		1	0	1	0	273545	0	331037	0	1	1	129; 204; 245; 265; 503; 519; 633; 697; 816; 944; 996; 1053; 1065; 1183; 1267; 1309; 1319; 1328; 1384; 1391; 1445; 1504; 1519; 1561; 1612; 1628; 1708; 1761; 1764; 1885; 1892; 1903; 1966; 2228; 2239; 2302; 2369; 2380; 2497; 2508; 2556; 2818; 2825; 3024; 3065; 3277; 3898; 4169; 4303; 4559; 4616; 4637; 4640; 4948; 5045; 5050; 5329; 5453	119	58	129; 172; 184; 204; 245; 265; 393; 503; 519; 543; 633; 697; 762; 816; 890; 944; 996; 1011; 1053; 1065; 1076; 1081; 1139; 1183; 1193; 1252; 1260; 1267; 1309; 1319; 1328; 1384; 1391; 1445; 1504; 1519; 1561; 1582; 1628; 1697; 1708; 1761; 1764; 1823; 1885; 1892; 1903; 1966; 2228; 2302; 2369; 2380; 2428; 2497; 2508; 2556; 2818; 2825; 2869; 2890; 3017; 3024; 3065; 3086; 3270; 3277; 3898; 3964; 3967; 41…	199	86
Ahnak	66395	569007630	XP_006527317.1	neuroblast differentiation-associated protein AHNAK isoform X2 [Mus musculus]	790	[K].LHAPGLDLKGVGGK.[V]	LHAPGLDLkGVGGK	[K9](Biotin)	529.961	3	5045	1	HAPGLDLkGVGGKVH	569007630	0	1	0	1		529.961		529.961		3		3	0	1	0	1	0	186189	0	136930	1	1	129; 204; 245; 265; 503; 519; 633; 697; 816; 944; 996; 1053; 1065; 1183; 1267; 1309; 1319; 1328; 1384; 1391; 1445; 1504; 1519; 1561; 1612; 1628; 1708; 1761; 1764; 1885; 1892; 1903; 1966; 2228; 2239; 2302; 2369; 2380; 2497; 2508; 2556; 2818; 2825; 3024; 3065; 3277; 3898; 4169; 4303; 4559; 4616; 4637; 4640; 4948; 5045; 5050; 5329; 5453	119	58	129; 172; 184; 204; 245; 265; 393; 503; 519; 543; 633; 697; 762; 816; 890; 944; 996; 1011; 1053; 1065; 1076; 1081; 1139; 1183; 1193; 1252; 1260; 1267; 1309; 1319; 1328; 1384; 1391; 1445; 1504; 1519; 1561; 1582; 1628; 1697; 1708; 1761; 1764; 1823; 1885; 1892; 1903; 1966; 2228; 2302; 2369; 2380; 2428; 2497; 2508; 2556; 2818; 2825; 2869; 2890; 3017; 3024; 3065; 3086; 3270; 3277; 3898; 3964; 3967; 41…	199	86
Ahnak	66395	569007630	XP_006527317.1	neuroblast differentiation-associated protein AHNAK isoform X2 [Mus musculus]	790	[R].HEVTEISNTDVETQPGKTVIR.[L]	HEVTEISNTDVETQPGkTVIR	[K17](Biotin)	860.432	3	204	1	DVETQPGkTVIRLPS	569007630	1	1	1	0	860.431	860.432	860.431		3	3	3		1	1	1	0	664629	520037	716237	0	2	1	129; 204; 245; 265; 503; 519; 633; 697; 816; 944; 996; 1053; 1065; 1183; 1267; 1309; 1319; 1328; 1384; 1391; 1445; 1504; 1519; 1561; 1612; 1628; 1708; 1761; 1764; 1885; 1892; 1903; 1966; 2228; 2239; 2302; 2369; 2380; 2497; 2508; 2556; 2818; 2825; 3024; 3065; 3277; 3898; 4169; 4303; 4559; 4616; 4637; 4640; 4948; 5045; 5050; 5329; 5453	119	58	129; 172; 184; 204; 245; 265; 393; 503; 519; 543; 633; 697; 762; 816; 890; 944; 996; 1011; 1053; 1065; 1076; 1081; 1139; 1183; 1193; 1252; 1260; 1267; 1309; 1319; 1328; 1384; 1391; 1445; 1504; 1519; 1561; 1582; 1628; 1697; 1708; 1761; 1764; 1823; 1885; 1892; 1903; 1966; 2228; 2302; 2369; 2380; 2428; 2497; 2508; 2556; 2818; 2825; 2869; 2890; 3017; 3024; 3065; 3086; 3270; 3277; 3898; 3964; 3967; 41…	199	86
Ahnak	66395	569007630	XP_006527317.1	neuroblast differentiation-associated protein AHNAK isoform X2 [Mus musculus]	790	[K].APKISMPDIDLNLKGPK.[V]	APkISMPDIDLNLKGPK	[K3](Biotin)	693.706	3	2497	2	EMNIKAPkISMPDID	569007630	1	1	1	1	688.372	688.374	693.706	688.374	3	3	3	3	2	2	3	2	2.90751e+06	2.98278e+06	1.60065e+06	1.57922e+06	4	5	129; 204; 245; 265; 503; 519; 633; 697; 816; 944; 996; 1053; 1065; 1183; 1267; 1309; 1319; 1328; 1384; 1391; 1445; 1504; 1519; 1561; 1612; 1628; 1708; 1761; 1764; 1885; 1892; 1903; 1966; 2228; 2239; 2302; 2369; 2380; 2497; 2508; 2556; 2818; 2825; 3024; 3065; 3277; 3898; 4169; 4303; 4559; 4616; 4637; 4640; 4948; 5045; 5050; 5329; 5453	119	58	129; 172; 184; 204; 245; 265; 393; 503; 519; 543; 633; 697; 762; 816; 890; 944; 996; 1011; 1053; 1065; 1076; 1081; 1139; 1183; 1193; 1252; 1260; 1267; 1309; 1319; 1328; 1384; 1391; 1445; 1504; 1519; 1561; 1582; 1628; 1697; 1708; 1761; 1764; 1823; 1885; 1892; 1903; 1966; 2228; 2302; 2369; 2380; 2428; 2497; 2508; 2556; 2818; 2825; 2869; 2890; 3017; 3024; 3065; 3086; 3270; 3277; 3898; 3964; 3967; 41…	199	86
Ahnak	66395	569007630	XP_006527317.1	neuroblast differentiation-associated protein AHNAK isoform X2 [Mus musculus]	790	[K].TPKVGISAPK.[L]	TPkVGISAPK	[K3](Biotin)	612.344	2	4640	1	NVHLKTPkVGISAPK	569007630	0	1	1	0		612.344	612.344			2	2		0	1	1	0	0	272090	468637	0	1	1	129; 204; 245; 265; 503; 519; 633; 697; 816; 944; 996; 1053; 1065; 1183; 1267; 1309; 1319; 1328; 1384; 1391; 1445; 1504; 1519; 1561; 1612; 1628; 1708; 1761; 1764; 1885; 1892; 1903; 1966; 2228; 2239; 2302; 2369; 2380; 2497; 2508; 2556; 2818; 2825; 3024; 3065; 3277; 3898; 4169; 4303; 4559; 4616; 4637; 4640; 4948; 5045; 5050; 5329; 5453	119	58	129; 172; 184; 204; 245; 265; 393; 503; 519; 543; 633; 697; 762; 816; 890; 944; 996; 1011; 1053; 1065; 1076; 1081; 1139; 1183; 1193; 1252; 1260; 1267; 1309; 1319; 1328; 1384; 1391; 1445; 1504; 1519; 1561; 1582; 1628; 1697; 1708; 1761; 1764; 1823; 1885; 1892; 1903; 1966; 2228; 2302; 2369; 2380; 2428; 2497; 2508; 2556; 2818; 2825; 2869; 2890; 3017; 3024; 3065; 3086; 3270; 3277; 3898; 3964; 3967; 41…	199	86
Ahnak	66395	569007630	XP_006527317.1	neuroblast differentiation-associated protein AHNAK isoform X2 [Mus musculus]	790	[RK].APKISMPDVDLHLK.[G]	APkISMPDVDLHLK	[K3](Biotin)	597.316	3	816	1	EMNIRAPkISMPDVD	569007630	1	0	1	0	597.316		597.316		3		3		1	0	1	0	72474.8	0	120778	0	1	1	129; 204; 245; 265; 503; 519; 633; 697; 816; 944; 996; 1053; 1065; 1183; 1267; 1309; 1319; 1328; 1384; 1391; 1445; 1504; 1519; 1561; 1612; 1628; 1708; 1761; 1764; 1885; 1892; 1903; 1966; 2228; 2239; 2302; 2369; 2380; 2497; 2508; 2556; 2818; 2825; 3024; 3065; 3277; 3898; 4169; 4303; 4559; 4616; 4637; 4640; 4948; 5045; 5050; 5329; 5453	119	58	129; 172; 184; 204; 245; 265; 393; 503; 519; 543; 633; 697; 762; 816; 890; 944; 996; 1011; 1053; 1065; 1076; 1081; 1139; 1183; 1193; 1252; 1260; 1267; 1309; 1319; 1328; 1384; 1391; 1445; 1504; 1519; 1561; 1582; 1628; 1697; 1708; 1761; 1764; 1823; 1885; 1892; 1903; 1966; 2228; 2302; 2369; 2380; 2428; 2497; 2508; 2556; 2818; 2825; 2869; 2890; 3017; 3024; 3065; 3086; 3270; 3277; 3898; 3964; 3967; 41…	199	86
Ahnak	66395	569007630	XP_006527317.1	neuroblast differentiation-associated protein AHNAK isoform X2 [Mus musculus]	790	[K].APKISMPDLHLKGPK.[V]	APkISMPDLHLKGPK	[K3](Biotin)	620.007	4	1319	2	EMNIKAPkISMPDLH	569007630	1	1	1	1	469.257	620.007	620.007	465.258	4	3	3	4	3	2	3	2	3.64052e+06	1.83056e+06	5.69662e+06	1.44213e+06	5	5	129; 204; 245; 265; 503; 519; 633; 697; 816; 944; 996; 1053; 1065; 1183; 1267; 1309; 1319; 1328; 1384; 1391; 1445; 1504; 1519; 1561; 1612; 1628; 1708; 1761; 1764; 1885; 1892; 1903; 1966; 2228; 2239; 2302; 2369; 2380; 2497; 2508; 2556; 2818; 2825; 3024; 3065; 3277; 3898; 4169; 4303; 4559; 4616; 4637; 4640; 4948; 5045; 5050; 5329; 5453	119	58	129; 172; 184; 204; 245; 265; 393; 503; 519; 543; 633; 697; 762; 816; 890; 944; 996; 1011; 1053; 1065; 1076; 1081; 1139; 1183; 1193; 1252; 1260; 1267; 1309; 1319; 1328; 1384; 1391; 1445; 1504; 1519; 1561; 1582; 1628; 1697; 1708; 1761; 1764; 1823; 1885; 1892; 1903; 1966; 2228; 2302; 2369; 2380; 2428; 2497; 2508; 2556; 2818; 2825; 2869; 2890; 3017; 3024; 3065; 3086; 3270; 3277; 3898; 3964; 3967; 41…	199	86
Ahnak	66395	569007630	XP_006527317.1	neuroblast differentiation-associated protein AHNAK isoform X2 [Mus musculus]	790	[K].FSMPGFKGEGPEVDIPK.[A]	FSMPGFkGEGPEVDIPK	[K7](Biotin)	687.667	3	1519	1	KFSMPGFkGEGPEVD	569007630	1	1	1	1	687.666	687.665	687.666	687.667	3	3	3	3	1	1	1	1	108724	77575.1	95012	73454.7	2	2	129; 204; 245; 265; 503; 519; 633; 697; 816; 944; 996; 1053; 1065; 1183; 1267; 1309; 1319; 1328; 1384; 1391; 1445; 1504; 1519; 1561; 1612; 1628; 1708; 1761; 1764; 1885; 1892; 1903; 1966; 2228; 2239; 2302; 2369; 2380; 2497; 2508; 2556; 2818; 2825; 3024; 3065; 3277; 3898; 4169; 4303; 4559; 4616; 4637; 4640; 4948; 5045; 5050; 5329; 5453	119	58	129; 172; 184; 204; 245; 265; 393; 503; 519; 543; 633; 697; 762; 816; 890; 944; 996; 1011; 1053; 1065; 1076; 1081; 1139; 1183; 1193; 1252; 1260; 1267; 1309; 1319; 1328; 1384; 1391; 1445; 1504; 1519; 1561; 1582; 1628; 1697; 1708; 1761; 1764; 1823; 1885; 1892; 1903; 1966; 2228; 2302; 2369; 2380; 2428; 2497; 2508; 2556; 2818; 2825; 2869; 2890; 3017; 3024; 3065; 3086; 3270; 3277; 3898; 3964; 3967; 41…	199	86
Ahnak	66395	569007630	XP_006527317.1	neuroblast differentiation-associated protein AHNAK isoform X2 [Mus musculus]	790	[K].TPKISMPDVDLHIKGPK.[V]	TPkISMPDVDLHIKGPK	[K3](Biotin)	530.282	4	697	2	EVSVKTPkISMPDVD	569007630	1	1	1	1	530.282	526.284	526.284	526.284	4	4	4	4	3	2	1	2	1.57387e+06	1.38404e+06	599299	843080	5	3	129; 204; 245; 265; 503; 519; 633; 697; 816; 944; 996; 1053; 1065; 1183; 1267; 1309; 1319; 1328; 1384; 1391; 1445; 1504; 1519; 1561; 1612; 1628; 1708; 1761; 1764; 1885; 1892; 1903; 1966; 2228; 2239; 2302; 2369; 2380; 2497; 2508; 2556; 2818; 2825; 3024; 3065; 3277; 3898; 4169; 4303; 4559; 4616; 4637; 4640; 4948; 5045; 5050; 5329; 5453	119	58	129; 172; 184; 204; 245; 265; 393; 503; 519; 543; 633; 697; 762; 816; 890; 944; 996; 1011; 1053; 1065; 1076; 1081; 1139; 1183; 1193; 1252; 1260; 1267; 1309; 1319; 1328; 1384; 1391; 1445; 1504; 1519; 1561; 1582; 1628; 1697; 1708; 1761; 1764; 1823; 1885; 1892; 1903; 1966; 2228; 2302; 2369; 2380; 2428; 2497; 2508; 2556; 2818; 2825; 2869; 2890; 3017; 3024; 3065; 3086; 3270; 3277; 3898; 3964; 3967; 41…	199	86
Ahnak	66395	569007630	XP_006527317.1	neuroblast differentiation-associated protein AHNAK isoform X2 [Mus musculus]	790	[K].FKMPDMHFK.[AT]	FkMPDMHFK	[K2](Biotin)	469.553	3	1183	1	KLKGPKFkMPDMHFK	569007630	1	1	1	0	469.553	469.552	469.552		3	3	3		1	1	1	0	472291	355029	529805	0	2	1	129; 204; 245; 265; 503; 519; 633; 697; 816; 944; 996; 1053; 1065; 1183; 1267; 1309; 1319; 1328; 1384; 1391; 1445; 1504; 1519; 1561; 1612; 1628; 1708; 1761; 1764; 1885; 1892; 1903; 1966; 2228; 2239; 2302; 2369; 2380; 2497; 2508; 2556; 2818; 2825; 3024; 3065; 3277; 3898; 4169; 4303; 4559; 4616; 4637; 4640; 4948; 5045; 5050; 5329; 5453	119	58	129; 172; 184; 204; 245; 265; 393; 503; 519; 543; 633; 697; 762; 816; 890; 944; 996; 1011; 1053; 1065; 1076; 1081; 1139; 1183; 1193; 1252; 1260; 1267; 1309; 1319; 1328; 1384; 1391; 1445; 1504; 1519; 1561; 1582; 1628; 1697; 1708; 1761; 1764; 1823; 1885; 1892; 1903; 1966; 2228; 2302; 2369; 2380; 2428; 2497; 2508; 2556; 2818; 2825; 2869; 2890; 3017; 3024; 3065; 3086; 3270; 3277; 3898; 3964; 3967; 41…	199	86
Ahnak	66395	569007630	XP_006527317.1	neuroblast differentiation-associated protein AHNAK isoform X2 [Mus musculus]	790	[R].AGAISASGPELEGAGHSKFQVTVPGAK.[V]	AGAISASGPELEGAGHSkFQVTVPGAK	[K18](Biotin)	698.857	4	245	1	LEGAGHSkFQVTVPG	569007630	1	1	1	1	698.856	698.857	698.857	698.857	4	4	4	4	2	1	2	1	2.15792e+06	501757	1.45987e+06	310116	3	3	129; 204; 245; 265; 503; 519; 633; 697; 816; 944; 996; 1053; 1065; 1183; 1267; 1309; 1319; 1328; 1384; 1391; 1445; 1504; 1519; 1561; 1612; 1628; 1708; 1761; 1764; 1885; 1892; 1903; 1966; 2228; 2239; 2302; 2369; 2380; 2497; 2508; 2556; 2818; 2825; 3024; 3065; 3277; 3898; 4169; 4303; 4559; 4616; 4637; 4640; 4948; 5045; 5050; 5329; 5453	119	58	129; 172; 184; 204; 245; 265; 393; 503; 519; 543; 633; 697; 762; 816; 890; 944; 996; 1011; 1053; 1065; 1076; 1081; 1139; 1183; 1193; 1252; 1260; 1267; 1309; 1319; 1328; 1384; 1391; 1445; 1504; 1519; 1561; 1582; 1628; 1697; 1708; 1761; 1764; 1823; 1885; 1892; 1903; 1966; 2228; 2302; 2369; 2380; 2428; 2497; 2508; 2556; 2818; 2825; 2869; 2890; 3017; 3024; 3065; 3086; 3270; 3277; 3898; 3964; 3967; 41…	199	86
Ahnak	66395	569007630	XP_006527317.1	neuroblast differentiation-associated protein AHNAK isoform X2 [Mus musculus]	790	[K].FNFSGSKVQTPEVDVK.[L]	FNFSGSkVQTPEVDVK	[K7](Biotin)	670.002	3	3024	1	KFNFSGSkVQTPEVD	569007630	1	1	1	1	670.001	670.002	670	670	3	3	3	3	1	1	1	1	499900	374765	561260	244424	2	2	129; 204; 245; 265; 503; 519; 633; 697; 816; 944; 996; 1053; 1065; 1183; 1267; 1309; 1319; 1328; 1384; 1391; 1445; 1504; 1519; 1561; 1612; 1628; 1708; 1761; 1764; 1885; 1892; 1903; 1966; 2228; 2239; 2302; 2369; 2380; 2497; 2508; 2556; 2818; 2825; 3024; 3065; 3277; 3898; 4169; 4303; 4559; 4616; 4637; 4640; 4948; 5045; 5050; 5329; 5453	119	58	129; 172; 184; 204; 245; 265; 393; 503; 519; 543; 633; 697; 762; 816; 890; 944; 996; 1011; 1053; 1065; 1076; 1081; 1139; 1183; 1193; 1252; 1260; 1267; 1309; 1319; 1328; 1384; 1391; 1445; 1504; 1519; 1561; 1582; 1628; 1697; 1708; 1761; 1764; 1823; 1885; 1892; 1903; 1966; 2228; 2302; 2369; 2380; 2428; 2497; 2508; 2556; 2818; 2825; 2869; 2890; 3017; 3024; 3065; 3086; 3270; 3277; 3898; 3964; 3967; 41…	199	86
Ahnak	66395	569007630	XP_006527317.1	neuroblast differentiation-associated protein AHNAK isoform X2 [Mus musculus]	790	[KS].LKGPKFK.[MV]	LKGPkFK	[K5](Biotin)	522.307	3	1053	2	EGKLKGPkFKMPEMH	569007630	1	1	1	1	348.54	348.54	522.307	348.54	3	3	2	3	2	1	2	1	9912034	5.45915e+06	9438603	4152264	3	3	129; 204; 245; 265; 503; 519; 633; 697; 816; 944; 996; 1053; 1065; 1183; 1267; 1309; 1319; 1328; 1384; 1391; 1445; 1504; 1519; 1561; 1612; 1628; 1708; 1761; 1764; 1885; 1892; 1903; 1966; 2228; 2239; 2302; 2369; 2380; 2497; 2508; 2556; 2818; 2825; 3024; 3065; 3277; 3898; 4169; 4303; 4559; 4616; 4637; 4640; 4948; 5045; 5050; 5329; 5453	119	58	129; 172; 184; 204; 245; 265; 393; 503; 519; 543; 633; 697; 762; 816; 890; 944; 996; 1011; 1053; 1065; 1076; 1081; 1139; 1183; 1193; 1252; 1260; 1267; 1309; 1319; 1328; 1384; 1391; 1445; 1504; 1519; 1561; 1582; 1628; 1697; 1708; 1761; 1764; 1823; 1885; 1892; 1903; 1966; 2228; 2302; 2369; 2380; 2428; 2497; 2508; 2556; 2818; 2825; 2869; 2890; 3017; 3024; 3065; 3086; 3270; 3277; 3898; 3964; 3967; 41…	199	86
Ahnak	66395	569007630	XP_006527317.1	neuroblast differentiation-associated protein AHNAK isoform X2 [Mus musculus]	790	[K].APKISMPDLHLKGPK.[V]	APkISMPDLHLKGPK	[K3](Biotin)	620.007	4	1319	2	EMNIKAPkISMPDLH	569007630	1	1	1	1	469.257	620.007	620.007	465.258	4	3	3	4	3	2	3	2	3.64052e+06	1.83056e+06	5.69662e+06	1.44213e+06	5	5	129; 204; 245; 265; 503; 519; 633; 697; 816; 944; 996; 1053; 1065; 1183; 1267; 1309; 1319; 1328; 1384; 1391; 1445; 1504; 1519; 1561; 1612; 1628; 1708; 1761; 1764; 1885; 1892; 1903; 1966; 2228; 2239; 2302; 2369; 2380; 2497; 2508; 2556; 2818; 2825; 3024; 3065; 3277; 3898; 4169; 4303; 4559; 4616; 4637; 4640; 4948; 5045; 5050; 5329; 5453	119	58	129; 172; 184; 204; 245; 265; 393; 503; 519; 543; 633; 697; 762; 816; 890; 944; 996; 1011; 1053; 1065; 1076; 1081; 1139; 1183; 1193; 1252; 1260; 1267; 1309; 1319; 1328; 1384; 1391; 1445; 1504; 1519; 1561; 1582; 1628; 1697; 1708; 1761; 1764; 1823; 1885; 1892; 1903; 1966; 2228; 2302; 2369; 2380; 2428; 2497; 2508; 2556; 2818; 2825; 2869; 2890; 3017; 3024; 3065; 3086; 3270; 3277; 3898; 3964; 3967; 41…	199	86
Ahnak	66395	569007630	XP_006527317.1	neuroblast differentiation-associated protein AHNAK isoform X2 [Mus musculus]	790	[K].GDVKGPQMAVKGSR.[V]	GDVKGPQMAVkGSR	[K11](Biotin)	552.617	3	543	2	KGPQMAVkGSRVDIE	569007630	1	0	0	0	552.617				3				1	0	0	0	409286	0	0	0	1	0	129; 204; 245; 265; 503; 519; 633; 697; 816; 944; 996; 1053; 1065; 1183; 1267; 1309; 1319; 1328; 1384; 1391; 1445; 1504; 1519; 1561; 1612; 1628; 1708; 1761; 1764; 1885; 1892; 1903; 1966; 2228; 2239; 2302; 2369; 2380; 2497; 2508; 2556; 2818; 2825; 3024; 3065; 3277; 3898; 4169; 4303; 4559; 4616; 4637; 4640; 4948; 5045; 5050; 5329; 5453	119	58	129; 172; 184; 204; 245; 265; 393; 503; 519; 543; 633; 697; 762; 816; 890; 944; 996; 1011; 1053; 1065; 1076; 1081; 1139; 1183; 1193; 1252; 1260; 1267; 1309; 1319; 1328; 1384; 1391; 1445; 1504; 1519; 1561; 1582; 1628; 1697; 1708; 1761; 1764; 1823; 1885; 1892; 1903; 1966; 2228; 2302; 2369; 2380; 2428; 2497; 2508; 2556; 2818; 2825; 2869; 2890; 3017; 3024; 3065; 3086; 3270; 3277; 3898; 3964; 3967; 41…	199	86
Ahnak	66395	569007630	XP_006527317.1	neuroblast differentiation-associated protein AHNAK isoform X2 [Mus musculus]	790	[K].GPKVEAPDVEVHGPDWHLKMPK.[V]	GPKVEAPDVEVHGPDWHLkMPK	[K19](Biotin)	673.837	5	1628	2	HGPDWHLkMPKVKMP	569007630	1	1	1	0	539.274	539.273	673.837		5	5	4		2	1	2	0	473740	327702	346894	0	3	2	129; 204; 245; 265; 503; 519; 633; 697; 816; 944; 996; 1053; 1065; 1183; 1267; 1309; 1319; 1328; 1384; 1391; 1445; 1504; 1519; 1561; 1612; 1628; 1708; 1761; 1764; 1885; 1892; 1903; 1966; 2228; 2239; 2302; 2369; 2380; 2497; 2508; 2556; 2818; 2825; 3024; 3065; 3277; 3898; 4169; 4303; 4559; 4616; 4637; 4640; 4948; 5045; 5050; 5329; 5453	119	58	129; 172; 184; 204; 245; 265; 393; 503; 519; 543; 633; 697; 762; 816; 890; 944; 996; 1011; 1053; 1065; 1076; 1081; 1139; 1183; 1193; 1252; 1260; 1267; 1309; 1319; 1328; 1384; 1391; 1445; 1504; 1519; 1561; 1582; 1628; 1697; 1708; 1761; 1764; 1823; 1885; 1892; 1903; 1966; 2228; 2302; 2369; 2380; 2428; 2497; 2508; 2556; 2818; 2825; 2869; 2890; 3017; 3024; 3065; 3086; 3270; 3277; 3898; 3964; 3967; 41…	199	86
Ahnak	66395	569007630	XP_006527317.1	neuroblast differentiation-associated protein AHNAK isoform X2 [Mus musculus]	790	[K].GKFSLFK.[S]	GkFSLFK	[K2](Biotin)	526.784	2	5473	1	EASSPKGkFSLFKSK	569007630	1	0	0	0	526.784				2				1	0	0	0	198371	0	0	0	1	0	129; 204; 245; 265; 503; 519; 633; 697; 816; 944; 996; 1053; 1065; 1183; 1267; 1309; 1319; 1328; 1384; 1391; 1445; 1504; 1519; 1561; 1612; 1628; 1708; 1761; 1764; 1885; 1892; 1903; 1966; 2228; 2239; 2302; 2369; 2380; 2497; 2508; 2556; 2818; 2825; 3024; 3065; 3277; 3898; 4169; 4303; 4559; 4616; 4637; 4640; 4948; 5045; 5050; 5329; 5453	119	58	129; 172; 184; 204; 245; 265; 393; 503; 519; 543; 633; 697; 762; 816; 890; 944; 996; 1011; 1053; 1065; 1076; 1081; 1139; 1183; 1193; 1252; 1260; 1267; 1309; 1319; 1328; 1384; 1391; 1445; 1504; 1519; 1561; 1582; 1628; 1697; 1708; 1761; 1764; 1823; 1885; 1892; 1903; 1966; 2228; 2302; 2369; 2380; 2428; 2497; 2508; 2556; 2818; 2825; 2869; 2890; 3017; 3024; 3065; 3086; 3270; 3277; 3898; 3964; 3967; 41…	199	86
Ahnak	66395	569007630	XP_006527317.1	neuroblast differentiation-associated protein AHNAK isoform X2 [Mus musculus]	790	[K].FKMPEMNIK.[AP]	FkMPEMNIK	[K2](Biotin)	682.333	2	1309	1	KLKGPKFkMPEMNIK	569007630	1	1	1	0	682.331	682.333	682.332		2	2	2		1	1	1	0	1.04839e+06	727825	1.07592e+06	0	2	1	129; 204; 245; 265; 503; 519; 633; 697; 816; 944; 996; 1053; 1065; 1183; 1267; 1309; 1319; 1328; 1384; 1391; 1445; 1504; 1519; 1561; 1612; 1628; 1708; 1761; 1764; 1885; 1892; 1903; 1966; 2228; 2239; 2302; 2369; 2380; 2497; 2508; 2556; 2818; 2825; 3024; 3065; 3277; 3898; 4169; 4303; 4559; 4616; 4637; 4640; 4948; 5045; 5050; 5329; 5453	119	58	129; 172; 184; 204; 245; 265; 393; 503; 519; 543; 633; 697; 762; 816; 890; 944; 996; 1011; 1053; 1065; 1076; 1081; 1139; 1183; 1193; 1252; 1260; 1267; 1309; 1319; 1328; 1384; 1391; 1445; 1504; 1519; 1561; 1582; 1628; 1697; 1708; 1761; 1764; 1823; 1885; 1892; 1903; 1966; 2228; 2302; 2369; 2380; 2428; 2497; 2508; 2556; 2818; 2825; 2869; 2890; 3017; 3024; 3065; 3086; 3270; 3277; 3898; 3964; 3967; 41…	199	86
Ahnak	66395	569007630	XP_006527317.1	neuroblast differentiation-associated protein AHNAK isoform X2 [Mus musculus]	790	[K].LKGPQITGPSLEGDLGLKGTK.[L]	LKGPQITGPSLEGDLGLkGTK	[K18](Biotin)	779.096	3	393	2	LEGDLGLkGTKLQGN	569007630	0	1	0	0		779.096				3			0	1	0	0	0	270974	0	0	1	0	129; 204; 245; 265; 503; 519; 633; 697; 816; 944; 996; 1053; 1065; 1183; 1267; 1309; 1319; 1328; 1384; 1391; 1445; 1504; 1519; 1561; 1612; 1628; 1708; 1761; 1764; 1885; 1892; 1903; 1966; 2228; 2239; 2302; 2369; 2380; 2497; 2508; 2556; 2818; 2825; 3024; 3065; 3277; 3898; 4169; 4303; 4559; 4616; 4637; 4640; 4948; 5045; 5050; 5329; 5453	119	58	129; 172; 184; 204; 245; 265; 393; 503; 519; 543; 633; 697; 762; 816; 890; 944; 996; 1011; 1053; 1065; 1076; 1081; 1139; 1183; 1193; 1252; 1260; 1267; 1309; 1319; 1328; 1384; 1391; 1445; 1504; 1519; 1561; 1582; 1628; 1697; 1708; 1761; 1764; 1823; 1885; 1892; 1903; 1966; 2228; 2302; 2369; 2380; 2428; 2497; 2508; 2556; 2818; 2825; 2869; 2890; 3017; 3024; 3065; 3086; 3270; 3277; 3898; 3964; 3967; 41…	199	86
Ahnak	66395	569007630	XP_006527317.1	neuroblast differentiation-associated protein AHNAK isoform X2 [Mus musculus]	790	[R].IYTTKIKPR.[L]	IYTTkIKPR	[K5](Biotin)	673.387	3	129	1	YQRIYTTkIKPRLRS	569007630	1	1	0	1	673.387	673.386		449.26	2	2		3	2	1	0	1	2.31084e+06	80860.2	0	998940	3	1	129; 204; 245; 265; 503; 519; 633; 697; 816; 944; 996; 1053; 1065; 1183; 1267; 1309; 1319; 1328; 1384; 1391; 1445; 1504; 1519; 1561; 1612; 1628; 1708; 1761; 1764; 1885; 1892; 1903; 1966; 2228; 2239; 2302; 2369; 2380; 2497; 2508; 2556; 2818; 2825; 3024; 3065; 3277; 3898; 4169; 4303; 4559; 4616; 4637; 4640; 4948; 5045; 5050; 5329; 5453	119	58	129; 172; 184; 204; 245; 265; 393; 503; 519; 543; 633; 697; 762; 816; 890; 944; 996; 1011; 1053; 1065; 1076; 1081; 1139; 1183; 1193; 1252; 1260; 1267; 1309; 1319; 1328; 1384; 1391; 1445; 1504; 1519; 1561; 1582; 1628; 1697; 1708; 1761; 1764; 1823; 1885; 1892; 1903; 1966; 2228; 2302; 2369; 2380; 2428; 2497; 2508; 2556; 2818; 2825; 2869; 2890; 3017; 3024; 3065; 3086; 3270; 3277; 3898; 3964; 3967; 41…	199	86
Ahnak	66395	569007630	XP_006527317.1	neuroblast differentiation-associated protein AHNAK isoform X2 [Mus musculus]	790	[K].VEAPDVEVHGPDWHLKMPK.[V]	VEAPDVEVHGPDWHLkMPK	[K16](Biotin)	603.298	4	1628	1	HGPDWHLkMPKVKMP	569007630	1	1	1	1	603.298	603.298	603.298	603.297	4	4	4	4	1	1	1	1	612282	495930	502863	355326	2	2	129; 204; 245; 265; 503; 519; 633; 697; 816; 944; 996; 1053; 1065; 1183; 1267; 1309; 1319; 1328; 1384; 1391; 1445; 1504; 1519; 1561; 1612; 1628; 1708; 1761; 1764; 1885; 1892; 1903; 1966; 2228; 2239; 2302; 2369; 2380; 2497; 2508; 2556; 2818; 2825; 3024; 3065; 3277; 3898; 4169; 4303; 4559; 4616; 4637; 4640; 4948; 5045; 5050; 5329; 5453	119	58	129; 172; 184; 204; 245; 265; 393; 503; 519; 543; 633; 697; 762; 816; 890; 944; 996; 1011; 1053; 1065; 1076; 1081; 1139; 1183; 1193; 1252; 1260; 1267; 1309; 1319; 1328; 1384; 1391; 1445; 1504; 1519; 1561; 1582; 1628; 1697; 1708; 1761; 1764; 1823; 1885; 1892; 1903; 1966; 2228; 2302; 2369; 2380; 2428; 2497; 2508; 2556; 2818; 2825; 2869; 2890; 3017; 3024; 3065; 3086; 3270; 3277; 3898; 3964; 3967; 41…	199	86
Ahnak	66395	569007630	XP_006527317.1	neuroblast differentiation-associated protein AHNAK isoform X2 [Mus musculus]	790	[K].VKTPEMIIQKPK.[I]	VKTPEMIIQkPK	[K10](Biotin)	546.643	3	503	1	TPEMIIQkPKISMQD	569007630	1	1	1	1	546.642	546.642	546.643	546.643	3	3	3	3	1	1	1	1	450967	311188	425132	193981	2	2	129; 204; 245; 265; 503; 519; 633; 697; 816; 944; 996; 1053; 1065; 1183; 1267; 1309; 1319; 1328; 1384; 1391; 1445; 1504; 1519; 1561; 1612; 1628; 1708; 1761; 1764; 1885; 1892; 1903; 1966; 2228; 2239; 2302; 2369; 2380; 2497; 2508; 2556; 2818; 2825; 3024; 3065; 3277; 3898; 4169; 4303; 4559; 4616; 4637; 4640; 4948; 5045; 5050; 5329; 5453	119	58	129; 172; 184; 204; 245; 265; 393; 503; 519; 543; 633; 697; 762; 816; 890; 944; 996; 1011; 1053; 1065; 1076; 1081; 1139; 1183; 1193; 1252; 1260; 1267; 1309; 1319; 1328; 1384; 1391; 1445; 1504; 1519; 1561; 1582; 1628; 1697; 1708; 1761; 1764; 1823; 1885; 1892; 1903; 1966; 2228; 2302; 2369; 2380; 2428; 2497; 2508; 2556; 2818; 2825; 2869; 2890; 3017; 3024; 3065; 3086; 3270; 3277; 3898; 3964; 3967; 41…	199	86
Ahnak	66395	569007630	XP_006527317.1	neuroblast differentiation-associated protein AHNAK isoform X2 [Mus musculus]	790	[K].MKGNLDMSAPK.[I]	MkGNLDMSAPK	[K2](Biotin)	709.337	2	1081	1	DLKGPKMkGNLDMSA	569007630	1	1	0	0	709.336	709.337			2	2			1	1	0	0	391942	226683	0	0	2	0	129; 204; 245; 265; 503; 519; 633; 697; 816; 944; 996; 1053; 1065; 1183; 1267; 1309; 1319; 1328; 1384; 1391; 1445; 1504; 1519; 1561; 1612; 1628; 1708; 1761; 1764; 1885; 1892; 1903; 1966; 2228; 2239; 2302; 2369; 2380; 2497; 2508; 2556; 2818; 2825; 3024; 3065; 3277; 3898; 4169; 4303; 4559; 4616; 4637; 4640; 4948; 5045; 5050; 5329; 5453	119	58	129; 172; 184; 204; 245; 265; 393; 503; 519; 543; 633; 697; 762; 816; 890; 944; 996; 1011; 1053; 1065; 1076; 1081; 1139; 1183; 1193; 1252; 1260; 1267; 1309; 1319; 1328; 1384; 1391; 1445; 1504; 1519; 1561; 1582; 1628; 1697; 1708; 1761; 1764; 1823; 1885; 1892; 1903; 1966; 2228; 2302; 2369; 2380; 2428; 2497; 2508; 2556; 2818; 2825; 2869; 2890; 3017; 3024; 3065; 3086; 3270; 3277; 3898; 3964; 3967; 41…	199	86
Ahnak	66395	569007630	XP_006527317.1	neuroblast differentiation-associated protein AHNAK isoform X2 [Mus musculus]	790	[K].ISMPDVGLNLKGPK.[L]	ISMPDVGLNLkGPK	[K11](Biotin)	847.953	2	1708	1	PDVGLNLkGPKLKSG	569007630	1	0	1	0	847.953		847.951		2		2		1	0	1	0	121343	0	92105.7	0	1	1	129; 204; 245; 265; 503; 519; 633; 697; 816; 944; 996; 1053; 1065; 1183; 1267; 1309; 1319; 1328; 1384; 1391; 1445; 1504; 1519; 1561; 1612; 1628; 1708; 1761; 1764; 1885; 1892; 1903; 1966; 2228; 2239; 2302; 2369; 2380; 2497; 2508; 2556; 2818; 2825; 3024; 3065; 3277; 3898; 4169; 4303; 4559; 4616; 4637; 4640; 4948; 5045; 5050; 5329; 5453	119	58	129; 172; 184; 204; 245; 265; 393; 503; 519; 543; 633; 697; 762; 816; 890; 944; 996; 1011; 1053; 1065; 1076; 1081; 1139; 1183; 1193; 1252; 1260; 1267; 1309; 1319; 1328; 1384; 1391; 1445; 1504; 1519; 1561; 1582; 1628; 1697; 1708; 1761; 1764; 1823; 1885; 1892; 1903; 1966; 2228; 2302; 2369; 2380; 2428; 2497; 2508; 2556; 2818; 2825; 2869; 2890; 3017; 3024; 3065; 3086; 3270; 3277; 3898; 3964; 3967; 41…	199	86
Ahnak	66395	569007630	XP_006527317.1	neuroblast differentiation-associated protein AHNAK isoform X2 [Mus musculus]	790	[K].APKISMPDVDLNMKGPK.[V]	APkISMPDVDLNMKGPK	[K3](Biotin)	689.686	3	1193	2	DMHFKAPkISMPDVD	569007630	0	1	0	0		689.686				3			0	1	0	0	0	409693	0	0	1	0	129; 204; 245; 265; 503; 519; 633; 697; 816; 944; 996; 1053; 1065; 1183; 1267; 1309; 1319; 1328; 1384; 1391; 1445; 1504; 1519; 1561; 1612; 1628; 1708; 1761; 1764; 1885; 1892; 1903; 1966; 2228; 2239; 2302; 2369; 2380; 2497; 2508; 2556; 2818; 2825; 3024; 3065; 3277; 3898; 4169; 4303; 4559; 4616; 4637; 4640; 4948; 5045; 5050; 5329; 5453	119	58	129; 172; 184; 204; 245; 265; 393; 503; 519; 543; 633; 697; 762; 816; 890; 944; 996; 1011; 1053; 1065; 1076; 1081; 1139; 1183; 1193; 1252; 1260; 1267; 1309; 1319; 1328; 1384; 1391; 1445; 1504; 1519; 1561; 1582; 1628; 1697; 1708; 1761; 1764; 1823; 1885; 1892; 1903; 1966; 2228; 2302; 2369; 2380; 2428; 2497; 2508; 2556; 2818; 2825; 2869; 2890; 3017; 3024; 3065; 3086; 3270; 3277; 3898; 3964; 3967; 41…	199	86
Ahnak	66395	569007630	XP_006527317.1	neuroblast differentiation-associated protein AHNAK isoform X2 [Mus musculus]	790	[K].FKMPDMHFKAPK.[I]	FKMPDMHFKAPK	[K](Biotin)			X	2
Ahnak	66395	569007630	XP_006527317.1	neuroblast differentiation-associated protein AHNAK isoform X2 [Mus musculus]	790	[K].FKMPKLNIK.[A]	FKMPkLNIK	[K5](Biotin)	448.923	3	1885	2	GSKFKMPkLNIKAAK	569007630	1	1	1	0	448.923	448.922	448.922		3	3	3		1	1	1	0	275704	159147	263610	0	2	1	129; 204; 245; 265; 503; 519; 633; 697; 816; 944; 996; 1053; 1065; 1183; 1267; 1309; 1319; 1328; 1384; 1391; 1445; 1504; 1519; 1561; 1612; 1628; 1708; 1761; 1764; 1885; 1892; 1903; 1966; 2228; 2239; 2302; 2369; 2380; 2497; 2508; 2556; 2818; 2825; 3024; 3065; 3277; 3898; 4169; 4303; 4559; 4616; 4637; 4640; 4948; 5045; 5050; 5329; 5453	119	58	129; 172; 184; 204; 245; 265; 393; 503; 519; 543; 633; 697; 762; 816; 890; 944; 996; 1011; 1053; 1065; 1076; 1081; 1139; 1183; 1193; 1252; 1260; 1267; 1309; 1319; 1328; 1384; 1391; 1445; 1504; 1519; 1561; 1582; 1628; 1697; 1708; 1761; 1764; 1823; 1885; 1892; 1903; 1966; 2228; 2302; 2369; 2380; 2428; 2497; 2508; 2556; 2818; 2825; 2869; 2890; 3017; 3024; 3065; 3086; 3270; 3277; 3898; 3964; 3967; 41…	199	86
Ahnak	66395	569007630	XP_006527317.1	neuroblast differentiation-associated protein AHNAK isoform X2 [Mus musculus]	790	[K].APKISMPDFDLHLK.[G]	APkISMPDFDLHLK	[K3](Biotin)	613.317	3	2369	1	EMNIKAPkISMPDFD	569007630	1	1	1	1	613.316	613.315	613.316	613.317	3	3	3	3	1	1	1	1	113782	91217.5	80387.2	62852.6	2	2	129; 204; 245; 265; 503; 519; 633; 697; 816; 944; 996; 1053; 1065; 1183; 1267; 1309; 1319; 1328; 1384; 1391; 1445; 1504; 1519; 1561; 1612; 1628; 1708; 1761; 1764; 1885; 1892; 1903; 1966; 2228; 2239; 2302; 2369; 2380; 2497; 2508; 2556; 2818; 2825; 3024; 3065; 3277; 3898; 4169; 4303; 4559; 4616; 4637; 4640; 4948; 5045; 5050; 5329; 5453	119	58	129; 172; 184; 204; 245; 265; 393; 503; 519; 543; 633; 697; 762; 816; 890; 944; 996; 1011; 1053; 1065; 1076; 1081; 1139; 1183; 1193; 1252; 1260; 1267; 1309; 1319; 1328; 1384; 1391; 1445; 1504; 1519; 1561; 1582; 1628; 1697; 1708; 1761; 1764; 1823; 1885; 1892; 1903; 1966; 2228; 2302; 2369; 2380; 2428; 2497; 2508; 2556; 2818; 2825; 2869; 2890; 3017; 3024; 3065; 3086; 3270; 3277; 3898; 3964; 3967; 41…	199	86
Ahnak	66395	569007630	XP_006527317.1	neuroblast differentiation-associated protein AHNAK isoform X2 [Mus musculus]	790	[K].FKMPFLSISSPK.[V]	FkMPFLSISSPK	[K2](Biotin)	804.421	2	3065	1	KVKGSKFkMPFLSIS	569007630	1	1	1	1	804.42	804.421	804.42	804.418	2	2	2	2	1	2	2	1	204031	181391	230022	77674	3	3	129; 204; 245; 265; 503; 519; 633; 697; 816; 944; 996; 1053; 1065; 1183; 1267; 1309; 1319; 1328; 1384; 1391; 1445; 1504; 1519; 1561; 1612; 1628; 1708; 1761; 1764; 1885; 1892; 1903; 1966; 2228; 2239; 2302; 2369; 2380; 2497; 2508; 2556; 2818; 2825; 3024; 3065; 3277; 3898; 4169; 4303; 4559; 4616; 4637; 4640; 4948; 5045; 5050; 5329; 5453	119	58	129; 172; 184; 204; 245; 265; 393; 503; 519; 543; 633; 697; 762; 816; 890; 944; 996; 1011; 1053; 1065; 1076; 1081; 1139; 1183; 1193; 1252; 1260; 1267; 1309; 1319; 1328; 1384; 1391; 1445; 1504; 1519; 1561; 1582; 1628; 1697; 1708; 1761; 1764; 1823; 1885; 1892; 1903; 1966; 2228; 2302; 2369; 2380; 2428; 2497; 2508; 2556; 2818; 2825; 2869; 2890; 3017; 3024; 3065; 3086; 3270; 3277; 3898; 3964; 3967; 41…	199	86
Ahnak	66395	569007630	XP_006527317.1	neuroblast differentiation-associated protein AHNAK isoform X2 [Mus musculus]	790	[K].APAVDIKGPKVEAPDVEVHGPDWHLK.[M]	APAVDIKGPKVEAPDVEVHGPDWHLK	[K](Biotin)			X	2
Ahnak	66395	569007630	XP_006527317.1	neuroblast differentiation-associated protein AHNAK isoform X2 [Mus musculus]	790	[K].MPKFSMPGFK.[AG]	MPkFSMPGFK	[K3](Biotin)	698.335	2	1260	1	MPKMKMPkFSMPGFK	569007630	1	0	0	0	698.335				2				1	0	0	0	162811	0	0	0	1	0	129; 204; 245; 265; 503; 519; 633; 697; 816; 944; 996; 1053; 1065; 1183; 1267; 1309; 1319; 1328; 1384; 1391; 1445; 1504; 1519; 1561; 1612; 1628; 1708; 1761; 1764; 1885; 1892; 1903; 1966; 2228; 2239; 2302; 2369; 2380; 2497; 2508; 2556; 2818; 2825; 3024; 3065; 3277; 3898; 4169; 4303; 4559; 4616; 4637; 4640; 4948; 5045; 5050; 5329; 5453	119	58	129; 172; 184; 204; 245; 265; 393; 503; 519; 543; 633; 697; 762; 816; 890; 944; 996; 1011; 1053; 1065; 1076; 1081; 1139; 1183; 1193; 1252; 1260; 1267; 1309; 1319; 1328; 1384; 1391; 1445; 1504; 1519; 1561; 1582; 1628; 1697; 1708; 1761; 1764; 1823; 1885; 1892; 1903; 1966; 2228; 2302; 2369; 2380; 2428; 2497; 2508; 2556; 2818; 2825; 2869; 2890; 3017; 3024; 3065; 3086; 3270; 3277; 3898; 3964; 3967; 41…	199	86
Ahnak	66395	569007630	XP_006527317.1	neuroblast differentiation-associated protein AHNAK isoform X2 [Mus musculus]	790	[K].APKISMPDVDLHLKGPK.[V]	APkISMPDVDLHLKGPK	[K3](Biotin)	522.78	4	1966	2	DMHFKAPkISMPDVD	569007630	1	1	1	1	522.78	518.781	518.781	518.781	4	4	4	4	2	2	2	1	2.94466e+06	2.59212e+06	2.41695e+06	1.41104e+06	4	3	129; 204; 245; 265; 503; 519; 633; 697; 816; 944; 996; 1053; 1065; 1183; 1267; 1309; 1319; 1328; 1384; 1391; 1445; 1504; 1519; 1561; 1612; 1628; 1708; 1761; 1764; 1885; 1892; 1903; 1966; 2228; 2239; 2302; 2369; 2380; 2497; 2508; 2556; 2818; 2825; 3024; 3065; 3277; 3898; 4169; 4303; 4559; 4616; 4637; 4640; 4948; 5045; 5050; 5329; 5453	119	58	129; 172; 184; 204; 245; 265; 393; 503; 519; 543; 633; 697; 762; 816; 890; 944; 996; 1011; 1053; 1065; 1076; 1081; 1139; 1183; 1193; 1252; 1260; 1267; 1309; 1319; 1328; 1384; 1391; 1445; 1504; 1519; 1561; 1582; 1628; 1697; 1708; 1761; 1764; 1823; 1885; 1892; 1903; 1966; 2228; 2302; 2369; 2380; 2428; 2497; 2508; 2556; 2818; 2825; 2869; 2890; 3017; 3024; 3065; 3086; 3270; 3277; 3898; 3964; 3967; 41…	199	86
Ahnak	66395	569007630	XP_006527317.1	neuroblast differentiation-associated protein AHNAK isoform X2 [Mus musculus]	790	[K].APKVSLPDVDLDLKGPK.[M]	APkVSLPDVDLDLKGPK	[K3](Biotin)	673.372	3	1065	2	EMHFKAPkVSLPDVD	569007630	1	0	0	1	673.372			673.37	3			3	1	0	0	1	262193	0	0	114558	1	1	129; 204; 245; 265; 503; 519; 633; 697; 816; 944; 996; 1053; 1065; 1183; 1267; 1309; 1319; 1328; 1384; 1391; 1445; 1504; 1519; 1561; 1612; 1628; 1708; 1761; 1764; 1885; 1892; 1903; 1966; 2228; 2239; 2302; 2369; 2380; 2497; 2508; 2556; 2818; 2825; 3024; 3065; 3277; 3898; 4169; 4303; 4559; 4616; 4637; 4640; 4948; 5045; 5050; 5329; 5453	119	58	129; 172; 184; 204; 245; 265; 393; 503; 519; 543; 633; 697; 762; 816; 890; 944; 996; 1011; 1053; 1065; 1076; 1081; 1139; 1183; 1193; 1252; 1260; 1267; 1309; 1319; 1328; 1384; 1391; 1445; 1504; 1519; 1561; 1582; 1628; 1697; 1708; 1761; 1764; 1823; 1885; 1892; 1903; 1966; 2228; 2302; 2369; 2380; 2428; 2497; 2508; 2556; 2818; 2825; 2869; 2890; 3017; 3024; 3065; 3086; 3270; 3277; 3898; 3964; 3967; 41…	199	86
Ahnak	66395	569007630	XP_006527317.1	neuroblast differentiation-associated protein AHNAK isoform X2 [Mus musculus]	790	[K].FSVPGFKAEGPEVDVNLPK.[A]	FSVPGFkAEGPEVDVNLPK	[K7](Biotin)	752.718	3	762	1	KFSVPGFkAEGPEVD	569007630	1	0	0	0	752.718				3				1	0	0	0	90766.3	0	0	0	1	0	129; 204; 245; 265; 503; 519; 633; 697; 816; 944; 996; 1053; 1065; 1183; 1267; 1309; 1319; 1328; 1384; 1391; 1445; 1504; 1519; 1561; 1612; 1628; 1708; 1761; 1764; 1885; 1892; 1903; 1966; 2228; 2239; 2302; 2369; 2380; 2497; 2508; 2556; 2818; 2825; 3024; 3065; 3277; 3898; 4169; 4303; 4559; 4616; 4637; 4640; 4948; 5045; 5050; 5329; 5453	119	58	129; 172; 184; 204; 245; 265; 393; 503; 519; 543; 633; 697; 762; 816; 890; 944; 996; 1011; 1053; 1065; 1076; 1081; 1139; 1183; 1193; 1252; 1260; 1267; 1309; 1319; 1328; 1384; 1391; 1445; 1504; 1519; 1561; 1582; 1628; 1697; 1708; 1761; 1764; 1823; 1885; 1892; 1903; 1966; 2228; 2302; 2369; 2380; 2428; 2497; 2508; 2556; 2818; 2825; 2869; 2890; 3017; 3024; 3065; 3086; 3270; 3277; 3898; 3964; 3967; 41…	199	86
Ahnak	66395	569007630	XP_006527317.1	neuroblast differentiation-associated protein AHNAK isoform X2 [Mus musculus]	790	[K].APKISMPDVDLHMKGPK.[V]	APkISMPDVDLHMKGPK	[K3](Biotin)	697.362	4	944	2	EMNIKAPkISMPDVD	569007630	0	1	1	1		697.362	523.271	523.271		3	4	4	0	1	1	1	0	0	388196	258642	1	2	129; 204; 245; 265; 503; 519; 633; 697; 816; 944; 996; 1053; 1065; 1183; 1267; 1309; 1319; 1328; 1384; 1391; 1445; 1504; 1519; 1561; 1612; 1628; 1708; 1761; 1764; 1885; 1892; 1903; 1966; 2228; 2239; 2302; 2369; 2380; 2497; 2508; 2556; 2818; 2825; 3024; 3065; 3277; 3898; 4169; 4303; 4559; 4616; 4637; 4640; 4948; 5045; 5050; 5329; 5453	119	58	129; 172; 184; 204; 245; 265; 393; 503; 519; 543; 633; 697; 762; 816; 890; 944; 996; 1011; 1053; 1065; 1076; 1081; 1139; 1183; 1193; 1252; 1260; 1267; 1309; 1319; 1328; 1384; 1391; 1445; 1504; 1519; 1561; 1582; 1628; 1697; 1708; 1761; 1764; 1823; 1885; 1892; 1903; 1966; 2228; 2302; 2369; 2380; 2428; 2497; 2508; 2556; 2818; 2825; 2869; 2890; 3017; 3024; 3065; 3086; 3270; 3277; 3898; 3964; 3967; 41…	199	86
Ahnak	66395	569007630	XP_006527317.1	neuroblast differentiation-associated protein AHNAK isoform X2 [Mus musculus]	790	[K].FKMPEMNIKAPK.[I]	FKMPEMNIKAPK	[K](Biotin)			X	2
Ahnak	66395	569007630	XP_006527317.1	neuroblast differentiation-associated protein AHNAK isoform X2 [Mus musculus]	790	[K].GVGGKVHIGADGVK.[M]	GVGGkVHIGADGVK	[K5](Biotin)	507.274	3	5050	1	DLKGVGGkVHIGADG	569007630	1	1	1	0	507.274	507.274	507.274		3	3	3		1	1	1	0	901756	686930	701569	0	2	1	129; 204; 245; 265; 503; 519; 633; 697; 816; 944; 996; 1053; 1065; 1183; 1267; 1309; 1319; 1328; 1384; 1391; 1445; 1504; 1519; 1561; 1612; 1628; 1708; 1761; 1764; 1885; 1892; 1903; 1966; 2228; 2239; 2302; 2369; 2380; 2497; 2508; 2556; 2818; 2825; 3024; 3065; 3277; 3898; 4169; 4303; 4559; 4616; 4637; 4640; 4948; 5045; 5050; 5329; 5453	119	58	129; 172; 184; 204; 245; 265; 393; 503; 519; 543; 633; 697; 762; 816; 890; 944; 996; 1011; 1053; 1065; 1076; 1081; 1139; 1183; 1193; 1252; 1260; 1267; 1309; 1319; 1328; 1384; 1391; 1445; 1504; 1519; 1561; 1582; 1628; 1697; 1708; 1761; 1764; 1823; 1885; 1892; 1903; 1966; 2228; 2302; 2369; 2380; 2428; 2497; 2508; 2556; 2818; 2825; 2869; 2890; 3017; 3024; 3065; 3086; 3270; 3277; 3898; 3964; 3967; 41…	199	86
Ahnak	66395	569007630	XP_006527317.1	neuroblast differentiation-associated protein AHNAK isoform X2 [Mus musculus]	790	[K].ISMPDVDLHLKGPK.[V]	ISMPDVDLHLKGPK	[K](Biotin)			X	1
Ahnak	66395	569007630	XP_006527317.1	neuroblast differentiation-associated protein AHNAK isoform X2 [Mus musculus]	790	[K].FKMPDLHLKAPK.[I]	FKMPDLHLkAPK	[K9](Biotin)	413.477	4	3964	2	KMPDLHLkAPKISMP	569007630	1	0	0	0	413.477				4				1	0	0	0	200034	0	0	0	1	0	129; 204; 245; 265; 503; 519; 633; 697; 816; 944; 996; 1053; 1065; 1183; 1267; 1309; 1319; 1328; 1384; 1391; 1445; 1504; 1519; 1561; 1612; 1628; 1708; 1761; 1764; 1885; 1892; 1903; 1966; 2228; 2239; 2302; 2369; 2380; 2497; 2508; 2556; 2818; 2825; 3024; 3065; 3277; 3898; 4169; 4303; 4559; 4616; 4637; 4640; 4948; 5045; 5050; 5329; 5453	119	58	129; 172; 184; 204; 245; 265; 393; 503; 519; 543; 633; 697; 762; 816; 890; 944; 996; 1011; 1053; 1065; 1076; 1081; 1139; 1183; 1193; 1252; 1260; 1267; 1309; 1319; 1328; 1384; 1391; 1445; 1504; 1519; 1561; 1582; 1628; 1697; 1708; 1761; 1764; 1823; 1885; 1892; 1903; 1966; 2228; 2302; 2369; 2380; 2428; 2497; 2508; 2556; 2818; 2825; 2869; 2890; 3017; 3024; 3065; 3086; 3270; 3277; 3898; 3964; 3967; 41…	199	86
Ahnak	66395	569007630	XP_006527317.1	neuroblast differentiation-associated protein AHNAK isoform X2 [Mus musculus]	790	[K].FSMPGFKAEGPEVSLPK.[A]	FSMPGFkAEGPEVSLPK	[K7](Biotin)	683.006	3	1267	1	KFSMPGFkAEGPEVS	569007630	1	1	1	0	683.006	683.006	683.006		3	3	3		1	1	1	0	157582	107343	108752	0	2	1	129; 204; 245; 265; 503; 519; 633; 697; 816; 944; 996; 1053; 1065; 1183; 1267; 1309; 1319; 1328; 1384; 1391; 1445; 1504; 1519; 1561; 1612; 1628; 1708; 1761; 1764; 1885; 1892; 1903; 1966; 2228; 2239; 2302; 2369; 2380; 2497; 2508; 2556; 2818; 2825; 3024; 3065; 3277; 3898; 4169; 4303; 4559; 4616; 4637; 4640; 4948; 5045; 5050; 5329; 5453	119	58	129; 172; 184; 204; 245; 265; 393; 503; 519; 543; 633; 697; 762; 816; 890; 944; 996; 1011; 1053; 1065; 1076; 1081; 1139; 1183; 1193; 1252; 1260; 1267; 1309; 1319; 1328; 1384; 1391; 1445; 1504; 1519; 1561; 1582; 1628; 1697; 1708; 1761; 1764; 1823; 1885; 1892; 1903; 1966; 2228; 2302; 2369; 2380; 2428; 2497; 2508; 2556; 2818; 2825; 2869; 2890; 3017; 3024; 3065; 3086; 3270; 3277; 3898; 3964; 3967; 41…	199	86
Ahnak	66395	569007630	XP_006527317.1	neuroblast differentiation-associated protein AHNAK isoform X2 [Mus musculus]	790	[K].APKISMPDFDLHLKGPK.[V]	APkISMPDFDLHLKGPK	[K3](Biotin)	530.782	4	2369	2	EMNIKAPkISMPDFD	569007630	1	1	1	1	530.781	530.781	530.782	530.781	4	4	4	4	1	1	1	1	751019	898459	434176	599219	2	2	129; 204; 245; 265; 503; 519; 633; 697; 816; 944; 996; 1053; 1065; 1183; 1267; 1309; 1319; 1328; 1384; 1391; 1445; 1504; 1519; 1561; 1612; 1628; 1708; 1761; 1764; 1885; 1892; 1903; 1966; 2228; 2239; 2302; 2369; 2380; 2497; 2508; 2556; 2818; 2825; 3024; 3065; 3277; 3898; 4169; 4303; 4559; 4616; 4637; 4640; 4948; 5045; 5050; 5329; 5453	119	58	129; 172; 184; 204; 245; 265; 393; 503; 519; 543; 633; 697; 762; 816; 890; 944; 996; 1011; 1053; 1065; 1076; 1081; 1139; 1183; 1193; 1252; 1260; 1267; 1309; 1319; 1328; 1384; 1391; 1445; 1504; 1519; 1561; 1582; 1628; 1697; 1708; 1761; 1764; 1823; 1885; 1892; 1903; 1966; 2228; 2302; 2369; 2380; 2428; 2497; 2508; 2556; 2818; 2825; 2869; 2890; 3017; 3024; 3065; 3086; 3270; 3277; 3898; 3964; 3967; 41…	199	86
Ahnak	66395	569007630	XP_006527317.1	neuroblast differentiation-associated protein AHNAK isoform X2 [Mus musculus]	790	[K].TPKISMPDIDLHLKSPK.[I]	TPkISMPDIDLHLKSPK	[K3](Biotin)	537.292	4	2302	2	DMHFKTPkISMPDID	569007630	1	1	1	1	537.291	537.291	537.291	537.292	4	4	4	4	1	1	1	1	812033	560410	427941	399422	2	2	129; 204; 245; 265; 503; 519; 633; 697; 816; 944; 996; 1053; 1065; 1183; 1267; 1309; 1319; 1328; 1384; 1391; 1445; 1504; 1519; 1561; 1612; 1628; 1708; 1761; 1764; 1885; 1892; 1903; 1966; 2228; 2239; 2302; 2369; 2380; 2497; 2508; 2556; 2818; 2825; 3024; 3065; 3277; 3898; 4169; 4303; 4559; 4616; 4637; 4640; 4948; 5045; 5050; 5329; 5453	119	58	129; 172; 184; 204; 245; 265; 393; 503; 519; 543; 633; 697; 762; 816; 890; 944; 996; 1011; 1053; 1065; 1076; 1081; 1139; 1183; 1193; 1252; 1260; 1267; 1309; 1319; 1328; 1384; 1391; 1445; 1504; 1519; 1561; 1582; 1628; 1697; 1708; 1761; 1764; 1823; 1885; 1892; 1903; 1966; 2228; 2302; 2369; 2380; 2428; 2497; 2508; 2556; 2818; 2825; 2869; 2890; 3017; 3024; 3065; 3086; 3270; 3277; 3898; 3964; 3967; 41…	199	86
Ahnak	66395	569007630	XP_006527317.1	neuroblast differentiation-associated protein AHNAK isoform X2 [Mus musculus]	790	[K].TPKISMPDVDLHLKGPK.[V]	TPkISMPDVDLHLKGPK	[K3](Biotin)	530.282	4	1764	2	DMHFKTPkISMPDVD	569007630	1	1	1	1	530.282	526.284	526.284	526.284	4	4	4	4	3	2	1	2	1.57387e+06	1.38404e+06	599299	843080	5	3	129; 204; 245; 265; 503; 519; 633; 697; 816; 944; 996; 1053; 1065; 1183; 1267; 1309; 1319; 1328; 1384; 1391; 1445; 1504; 1519; 1561; 1612; 1628; 1708; 1761; 1764; 1885; 1892; 1903; 1966; 2228; 2239; 2302; 2369; 2380; 2497; 2508; 2556; 2818; 2825; 3024; 3065; 3277; 3898; 4169; 4303; 4559; 4616; 4637; 4640; 4948; 5045; 5050; 5329; 5453	119	58	129; 172; 184; 204; 245; 265; 393; 503; 519; 543; 633; 697; 762; 816; 890; 944; 996; 1011; 1053; 1065; 1076; 1081; 1139; 1183; 1193; 1252; 1260; 1267; 1309; 1319; 1328; 1384; 1391; 1445; 1504; 1519; 1561; 1582; 1628; 1697; 1708; 1761; 1764; 1823; 1885; 1892; 1903; 1966; 2228; 2302; 2369; 2380; 2428; 2497; 2508; 2556; 2818; 2825; 2869; 2890; 3017; 3024; 3065; 3086; 3270; 3277; 3898; 3964; 3967; 41…	199	86
Ahnak	66395	569007630	XP_006527317.1	neuroblast differentiation-associated protein AHNAK isoform X2 [Mus musculus]	790	[K].APKISMPDVDLNIKGPK.[G]	APkISMPDVDLNIKGPK	[K3](Biotin)	683.702	3	1445	2	DMHFKAPkISMPDVD	569007630	1	1	1	1	683.701	683.702	683.7	683.702	3	3	3	3	1	1	1	1	381877	418661	234356	234712	2	2	129; 204; 245; 265; 503; 519; 633; 697; 816; 944; 996; 1053; 1065; 1183; 1267; 1309; 1319; 1328; 1384; 1391; 1445; 1504; 1519; 1561; 1612; 1628; 1708; 1761; 1764; 1885; 1892; 1903; 1966; 2228; 2239; 2302; 2369; 2380; 2497; 2508; 2556; 2818; 2825; 3024; 3065; 3277; 3898; 4169; 4303; 4559; 4616; 4637; 4640; 4948; 5045; 5050; 5329; 5453	119	58	129; 172; 184; 204; 245; 265; 393; 503; 519; 543; 633; 697; 762; 816; 890; 944; 996; 1011; 1053; 1065; 1076; 1081; 1139; 1183; 1193; 1252; 1260; 1267; 1309; 1319; 1328; 1384; 1391; 1445; 1504; 1519; 1561; 1582; 1628; 1697; 1708; 1761; 1764; 1823; 1885; 1892; 1903; 1966; 2228; 2302; 2369; 2380; 2428; 2497; 2508; 2556; 2818; 2825; 2869; 2890; 3017; 3024; 3065; 3086; 3270; 3277; 3898; 3964; 3967; 41…	199	86
Ahnak	66395	569007630	XP_006527317.1	neuroblast differentiation-associated protein AHNAK isoform X2 [Mus musculus]	790	[K].ISMPDFDLHLKGPK.[V]	ISMPDFDLHLkGPK	[K11](Biotin)	608.644	3	2380	1	PDFDLHLkGPKVKGD	569007630	1	1	1	1	608.644	608.644	608.643	608.643	3	3	3	3	1	1	1	1	436443	299691	222070	194103	2	2	129; 204; 245; 265; 503; 519; 633; 697; 816; 944; 996; 1053; 1065; 1183; 1267; 1309; 1319; 1328; 1384; 1391; 1445; 1504; 1519; 1561; 1612; 1628; 1708; 1761; 1764; 1885; 1892; 1903; 1966; 2228; 2239; 2302; 2369; 2380; 2497; 2508; 2556; 2818; 2825; 3024; 3065; 3277; 3898; 4169; 4303; 4559; 4616; 4637; 4640; 4948; 5045; 5050; 5329; 5453	119	58	129; 172; 184; 204; 245; 265; 393; 503; 519; 543; 633; 697; 762; 816; 890; 944; 996; 1011; 1053; 1065; 1076; 1081; 1139; 1183; 1193; 1252; 1260; 1267; 1309; 1319; 1328; 1384; 1391; 1445; 1504; 1519; 1561; 1582; 1628; 1697; 1708; 1761; 1764; 1823; 1885; 1892; 1903; 1966; 2228; 2302; 2369; 2380; 2428; 2497; 2508; 2556; 2818; 2825; 2869; 2890; 3017; 3024; 3065; 3086; 3270; 3277; 3898; 3964; 3967; 41…	199	86
Ahnak	66395	569007630	XP_006527317.1	neuroblast differentiation-associated protein AHNAK isoform X2 [Mus musculus]	790	[K].ISMPDVSLNLKGPK.[V]	ISMPDVSLNLkGPK	[K11](Biotin)	575.641	3	1582	1	PDVSLNLkGPKVKAD	569007630	1	1	0	0	575.641	575.641			3	3			1	1	0	0	139033	122689	0	0	2	0	129; 204; 245; 265; 503; 519; 633; 697; 816; 944; 996; 1053; 1065; 1183; 1267; 1309; 1319; 1328; 1384; 1391; 1445; 1504; 1519; 1561; 1612; 1628; 1708; 1761; 1764; 1885; 1892; 1903; 1966; 2228; 2239; 2302; 2369; 2380; 2497; 2508; 2556; 2818; 2825; 3024; 3065; 3277; 3898; 4169; 4303; 4559; 4616; 4637; 4640; 4948; 5045; 5050; 5329; 5453	119	58	129; 172; 184; 204; 245; 265; 393; 503; 519; 543; 633; 697; 762; 816; 890; 944; 996; 1011; 1053; 1065; 1076; 1081; 1139; 1183; 1193; 1252; 1260; 1267; 1309; 1319; 1328; 1384; 1391; 1445; 1504; 1519; 1561; 1582; 1628; 1697; 1708; 1761; 1764; 1823; 1885; 1892; 1903; 1966; 2228; 2302; 2369; 2380; 2428; 2497; 2508; 2556; 2818; 2825; 2869; 2890; 3017; 3024; 3065; 3086; 3270; 3277; 3898; 3964; 3967; 41…	199	86
Ahnak	66395	569007630	XP_006527317.1	neuroblast differentiation-associated protein AHNAK isoform X2 [Mus musculus]	790	[K].APKISMPDFDLNLKGPK.[V]	APkISMPDFDLNLKGPK	[K3](Biotin)	699.702	3	4169	2	DMHIKAPkISMPDFD	569007630	1	1	1	1	699.701	699.701	699.701	699.702	3	3	3	3	1	1	1	1	1.22174e+06	747932	490742	593368	2	2	129; 204; 245; 265; 503; 519; 633; 697; 816; 944; 996; 1053; 1065; 1183; 1267; 1309; 1319; 1328; 1384; 1391; 1445; 1504; 1519; 1561; 1612; 1628; 1708; 1761; 1764; 1885; 1892; 1903; 1966; 2228; 2239; 2302; 2369; 2380; 2497; 2508; 2556; 2818; 2825; 3024; 3065; 3277; 3898; 4169; 4303; 4559; 4616; 4637; 4640; 4948; 5045; 5050; 5329; 5453	119	58	129; 172; 184; 204; 245; 265; 393; 503; 519; 543; 633; 697; 762; 816; 890; 944; 996; 1011; 1053; 1065; 1076; 1081; 1139; 1183; 1193; 1252; 1260; 1267; 1309; 1319; 1328; 1384; 1391; 1445; 1504; 1519; 1561; 1582; 1628; 1697; 1708; 1761; 1764; 1823; 1885; 1892; 1903; 1966; 2228; 2302; 2369; 2380; 2428; 2497; 2508; 2556; 2818; 2825; 2869; 2890; 3017; 3024; 3065; 3086; 3270; 3277; 3898; 3964; 3967; 41…	199	86
Ahnak	66395	569007630	XP_006527317.1	neuroblast differentiation-associated protein AHNAK isoform X2 [Mus musculus]	790	[K].LAGNLHFSGPKIEGDVK.[G]	LAGNLHFSGPkIEGDVK	[K11](Biotin)	670.017	3	5329	1	NLHFSGPkIEGDVKG	569007630	1	1	0	1	670.017	670.015		670.017	3	3		3	1	1	0	1	484091	374301	0	272720	2	1	129; 204; 245; 265; 503; 519; 633; 697; 816; 944; 996; 1053; 1065; 1183; 1267; 1309; 1319; 1328; 1384; 1391; 1445; 1504; 1519; 1561; 1612; 1628; 1708; 1761; 1764; 1885; 1892; 1903; 1966; 2228; 2239; 2302; 2369; 2380; 2497; 2508; 2556; 2818; 2825; 3024; 3065; 3277; 3898; 4169; 4303; 4559; 4616; 4637; 4640; 4948; 5045; 5050; 5329; 5453	119	58	129; 172; 184; 204; 245; 265; 393; 503; 519; 543; 633; 697; 762; 816; 890; 944; 996; 1011; 1053; 1065; 1076; 1081; 1139; 1183; 1193; 1252; 1260; 1267; 1309; 1319; 1328; 1384; 1391; 1445; 1504; 1519; 1561; 1582; 1628; 1697; 1708; 1761; 1764; 1823; 1885; 1892; 1903; 1966; 2228; 2302; 2369; 2380; 2428; 2497; 2508; 2556; 2818; 2825; 2869; 2890; 3017; 3024; 3065; 3086; 3270; 3277; 3898; 3964; 3967; 41…	199	86
Ahnak	66395	569007630	XP_006527317.1	neuroblast differentiation-associated protein AHNAK isoform X2 [Mus musculus]	790	[K].FSMPGFKGEGPEVDVNLPK.[A]	FSMPGFkGEGPEVDVNLPK	[K7](Biotin)	758.704	3	2825	1	KFSMPGFkGEGPEVD	569007630	1	1	1	1	758.703	758.703	758.703	758.704	3	3	3	3	1	2	1	1	670813	539029	234918	410126	3	2	129; 204; 245; 265; 503; 519; 633; 697; 816; 944; 996; 1053; 1065; 1183; 1267; 1309; 1319; 1328; 1384; 1391; 1445; 1504; 1519; 1561; 1612; 1628; 1708; 1761; 1764; 1885; 1892; 1903; 1966; 2228; 2239; 2302; 2369; 2380; 2497; 2508; 2556; 2818; 2825; 3024; 3065; 3277; 3898; 4169; 4303; 4559; 4616; 4637; 4640; 4948; 5045; 5050; 5329; 5453	119	58	129; 172; 184; 204; 245; 265; 393; 503; 519; 543; 633; 697; 762; 816; 890; 944; 996; 1011; 1053; 1065; 1076; 1081; 1139; 1183; 1193; 1252; 1260; 1267; 1309; 1319; 1328; 1384; 1391; 1445; 1504; 1519; 1561; 1582; 1628; 1697; 1708; 1761; 1764; 1823; 1885; 1892; 1903; 1966; 2228; 2302; 2369; 2380; 2428; 2497; 2508; 2556; 2818; 2825; 2869; 2890; 3017; 3024; 3065; 3086; 3270; 3277; 3898; 3964; 3967; 41…	199	86
Ahnak	66395	569007630	XP_006527317.1	neuroblast differentiation-associated protein AHNAK isoform X2 [Mus musculus]	790	[K].FSMPGFKAEGPEVDVNLPK.[AV]	FSMPGFkAEGPEVDVNLPK	[K7](Biotin)	763.377	3	1391	1	KFSMPGFkAEGPEVD	569007630	1	1	1	1	763.377	763.376	763.374	763.374	3	3	3	3	2	2	1	1	816705	971165	233491	469116	4	2	129; 204; 245; 265; 503; 519; 633; 697; 816; 944; 996; 1053; 1065; 1183; 1267; 1309; 1319; 1328; 1384; 1391; 1445; 1504; 1519; 1561; 1612; 1628; 1708; 1761; 1764; 1885; 1892; 1903; 1966; 2228; 2239; 2302; 2369; 2380; 2497; 2508; 2556; 2818; 2825; 3024; 3065; 3277; 3898; 4169; 4303; 4559; 4616; 4637; 4640; 4948; 5045; 5050; 5329; 5453	119	58	129; 172; 184; 204; 245; 265; 393; 503; 519; 543; 633; 697; 762; 816; 890; 944; 996; 1011; 1053; 1065; 1076; 1081; 1139; 1183; 1193; 1252; 1260; 1267; 1309; 1319; 1328; 1384; 1391; 1445; 1504; 1519; 1561; 1582; 1628; 1697; 1708; 1761; 1764; 1823; 1885; 1892; 1903; 1966; 2228; 2302; 2369; 2380; 2428; 2497; 2508; 2556; 2818; 2825; 2869; 2890; 3017; 3024; 3065; 3086; 3270; 3277; 3898; 3964; 3967; 41…	199	86
Ahnak	66395	569007630	XP_006527317.1	neuroblast differentiation-associated protein AHNAK isoform X2 [Mus musculus]	790	[K].FKMPEMNIKPQK.[I]	FkMPEMNIKPQK	[K2](Biotin)	572.961	3	1561	1	KLKGPKFkMPEMNIK	569007630	1	0	1	0	572.961		572.96		3		3		1	0	1	0	170368	0	96389.1	0	1	1	129; 204; 245; 265; 503; 519; 633; 697; 816; 944; 996; 1053; 1065; 1183; 1267; 1309; 1319; 1328; 1384; 1391; 1445; 1504; 1519; 1561; 1612; 1628; 1708; 1761; 1764; 1885; 1892; 1903; 1966; 2228; 2239; 2302; 2369; 2380; 2497; 2508; 2556; 2818; 2825; 3024; 3065; 3277; 3898; 4169; 4303; 4559; 4616; 4637; 4640; 4948; 5045; 5050; 5329; 5453	119	58	129; 172; 184; 204; 245; 265; 393; 503; 519; 543; 633; 697; 762; 816; 890; 944; 996; 1011; 1053; 1065; 1076; 1081; 1139; 1183; 1193; 1252; 1260; 1267; 1309; 1319; 1328; 1384; 1391; 1445; 1504; 1519; 1561; 1582; 1628; 1697; 1708; 1761; 1764; 1823; 1885; 1892; 1903; 1966; 2228; 2302; 2369; 2380; 2428; 2497; 2508; 2556; 2818; 2825; 2869; 2890; 3017; 3024; 3065; 3086; 3270; 3277; 3898; 3964; 3967; 41…	199	86
Ahnak	66395	569007630	XP_006527317.1	neuroblast differentiation-associated protein AHNAK isoform X2 [Mus musculus]	790	[K].FSMPGFKGEGPEVDVSLPK.[A]	FSMPGFkGEGPEVDVSLPK	[K7](Biotin)	749.7	3	3277	1	KFSMPGFkGEGPEVD	569007630	1	1	1	0	749.699	749.7	749.7		3	3	3		1	1	1	0	498360	368599	164196	0	2	1	129; 204; 245; 265; 503; 519; 633; 697; 816; 944; 996; 1053; 1065; 1183; 1267; 1309; 1319; 1328; 1384; 1391; 1445; 1504; 1519; 1561; 1612; 1628; 1708; 1761; 1764; 1885; 1892; 1903; 1966; 2228; 2239; 2302; 2369; 2380; 2497; 2508; 2556; 2818; 2825; 3024; 3065; 3277; 3898; 4169; 4303; 4559; 4616; 4637; 4640; 4948; 5045; 5050; 5329; 5453	119	58	129; 172; 184; 204; 245; 265; 393; 503; 519; 543; 633; 697; 762; 816; 890; 944; 996; 1011; 1053; 1065; 1076; 1081; 1139; 1183; 1193; 1252; 1260; 1267; 1309; 1319; 1328; 1384; 1391; 1445; 1504; 1519; 1561; 1582; 1628; 1697; 1708; 1761; 1764; 1823; 1885; 1892; 1903; 1966; 2228; 2302; 2369; 2380; 2428; 2497; 2508; 2556; 2818; 2825; 2869; 2890; 3017; 3024; 3065; 3086; 3270; 3277; 3898; 3964; 3967; 41…	199	86
Ahnak	66395	569007630	XP_006527317.1	neuroblast differentiation-associated protein AHNAK isoform X2 [Mus musculus]	790	[K].AAKISMPDVDLNFKGPK.[L]	AAkISMPDVDLNFKGPK	[K3](Biotin)	686.358	3	1892	2	KLNIKAAkISMPDVD	569007630	1	1	1	1	686.357	686.358	686.357	686.357	3	3	3	3	1	1	1	1	419183	462280	210595	230636	2	2	129; 204; 245; 265; 503; 519; 633; 697; 816; 944; 996; 1053; 1065; 1183; 1267; 1309; 1319; 1328; 1384; 1391; 1445; 1504; 1519; 1561; 1612; 1628; 1708; 1761; 1764; 1885; 1892; 1903; 1966; 2228; 2239; 2302; 2369; 2380; 2497; 2508; 2556; 2818; 2825; 3024; 3065; 3277; 3898; 4169; 4303; 4559; 4616; 4637; 4640; 4948; 5045; 5050; 5329; 5453	119	58	129; 172; 184; 204; 245; 265; 393; 503; 519; 543; 633; 697; 762; 816; 890; 944; 996; 1011; 1053; 1065; 1076; 1081; 1139; 1183; 1193; 1252; 1260; 1267; 1309; 1319; 1328; 1384; 1391; 1445; 1504; 1519; 1561; 1582; 1628; 1697; 1708; 1761; 1764; 1823; 1885; 1892; 1903; 1966; 2228; 2302; 2369; 2380; 2428; 2497; 2508; 2556; 2818; 2825; 2869; 2890; 3017; 3024; 3065; 3086; 3270; 3277; 3898; 3964; 3967; 41…	199	86
Ahnak	66395	569007630	XP_006527317.1	neuroblast differentiation-associated protein AHNAK isoform X2 [Mus musculus]	790	[K].LSGPNLKMPSLEVSVPK.[I]	LSGPNLkMPSLEVSVPK	[K7](Biotin)	674.698	3	4616	1	KLSGPNLkMPSLEVS	569007630	1	1	1	1	674.697	674.698	674.698	674.696	3	3	3	3	1	1	1	1	308330	214040	177647	92581.8	2	2	129; 204; 245; 265; 503; 519; 633; 697; 816; 944; 996; 1053; 1065; 1183; 1267; 1309; 1319; 1328; 1384; 1391; 1445; 1504; 1519; 1561; 1612; 1628; 1708; 1761; 1764; 1885; 1892; 1903; 1966; 2228; 2239; 2302; 2369; 2380; 2497; 2508; 2556; 2818; 2825; 3024; 3065; 3277; 3898; 4169; 4303; 4559; 4616; 4637; 4640; 4948; 5045; 5050; 5329; 5453	119	58	129; 172; 184; 204; 245; 265; 393; 503; 519; 543; 633; 697; 762; 816; 890; 944; 996; 1011; 1053; 1065; 1076; 1081; 1139; 1183; 1193; 1252; 1260; 1267; 1309; 1319; 1328; 1384; 1391; 1445; 1504; 1519; 1561; 1582; 1628; 1697; 1708; 1761; 1764; 1823; 1885; 1892; 1903; 1966; 2228; 2302; 2369; 2380; 2428; 2497; 2508; 2556; 2818; 2825; 2869; 2890; 3017; 3024; 3065; 3086; 3270; 3277; 3898; 3964; 3967; 41…	199	86
Ahnak	66395	569007630	XP_006527317.1	neuroblast differentiation-associated protein AHNAK isoform X2 [Mus musculus]	790	[K].APKISMPEVDLNLKGPK.[V]	APkISMPEVDLNLKGPK	[K3](Biotin)	688.376	3	4303	2	DLHLKAPkISMPEVD	569007630	1	0	1	0	688.376		688.375		3		3		1	0	1	0	293620	0	143675	0	1	1	129; 204; 245; 265; 503; 519; 633; 697; 816; 944; 996; 1053; 1065; 1183; 1267; 1309; 1319; 1328; 1384; 1391; 1445; 1504; 1519; 1561; 1612; 1628; 1708; 1761; 1764; 1885; 1892; 1903; 1966; 2228; 2239; 2302; 2369; 2380; 2497; 2508; 2556; 2818; 2825; 3024; 3065; 3277; 3898; 4169; 4303; 4559; 4616; 4637; 4640; 4948; 5045; 5050; 5329; 5453	119	58	129; 172; 184; 204; 245; 265; 393; 503; 519; 543; 633; 697; 762; 816; 890; 944; 996; 1011; 1053; 1065; 1076; 1081; 1139; 1183; 1193; 1252; 1260; 1267; 1309; 1319; 1328; 1384; 1391; 1445; 1504; 1519; 1561; 1582; 1628; 1697; 1708; 1761; 1764; 1823; 1885; 1892; 1903; 1966; 2228; 2302; 2369; 2380; 2428; 2497; 2508; 2556; 2818; 2825; 2869; 2890; 3017; 3024; 3065; 3086; 3270; 3277; 3898; 3964; 3967; 41…	199	86
Ahnak	66395	569007630	XP_006527317.1	neuroblast differentiation-associated protein AHNAK isoform X2 [Mus musculus]	790	[K].TPKISMPDIDLHLK.[S]	TPkISMPDIDLHLK	[K3](Biotin)	611.992	3	2302	1	DMHFKTPkISMPDID	569007630	1	0	1	0	611.992		611.992		3		3		1	0	1	0	505568	0	189937	0	1	1	129; 204; 245; 265; 503; 519; 633; 697; 816; 944; 996; 1053; 1065; 1183; 1267; 1309; 1319; 1328; 1384; 1391; 1445; 1504; 1519; 1561; 1612; 1628; 1708; 1761; 1764; 1885; 1892; 1903; 1966; 2228; 2239; 2302; 2369; 2380; 2497; 2508; 2556; 2818; 2825; 3024; 3065; 3277; 3898; 4169; 4303; 4559; 4616; 4637; 4640; 4948; 5045; 5050; 5329; 5453	119	58	129; 172; 184; 204; 245; 265; 393; 503; 519; 543; 633; 697; 762; 816; 890; 944; 996; 1011; 1053; 1065; 1076; 1081; 1139; 1183; 1193; 1252; 1260; 1267; 1309; 1319; 1328; 1384; 1391; 1445; 1504; 1519; 1561; 1582; 1628; 1697; 1708; 1761; 1764; 1823; 1885; 1892; 1903; 1966; 2228; 2302; 2369; 2380; 2428; 2497; 2508; 2556; 2818; 2825; 2869; 2890; 3017; 3024; 3065; 3086; 3270; 3277; 3898; 3964; 3967; 41…	199	86
Ahnak	66395	569007630	XP_006527317.1	neuroblast differentiation-associated protein AHNAK isoform X2 [Mus musculus]	790	[K].VGIDAPDVEVHGPDWHLKMPK.[V]	VGIDAPDVEVHGPDWHLkMPK	[K18](Biotin)	642.321	4	1504	1	HGPDWHLkMPKVKMP	569007630	1	1	0	1	642.32	642.319		642.321	4	4		4	1	1	0	1	1.30702e+06	1.71202e+06	0	983086	2	1	129; 204; 245; 265; 503; 519; 633; 697; 816; 944; 996; 1053; 1065; 1183; 1267; 1309; 1319; 1328; 1384; 1391; 1445; 1504; 1519; 1561; 1612; 1628; 1708; 1761; 1764; 1885; 1892; 1903; 1966; 2228; 2239; 2302; 2369; 2380; 2497; 2508; 2556; 2818; 2825; 3024; 3065; 3277; 3898; 4169; 4303; 4559; 4616; 4637; 4640; 4948; 5045; 5050; 5329; 5453	119	58	129; 172; 184; 204; 245; 265; 393; 503; 519; 543; 633; 697; 762; 816; 890; 944; 996; 1011; 1053; 1065; 1076; 1081; 1139; 1183; 1193; 1252; 1260; 1267; 1309; 1319; 1328; 1384; 1391; 1445; 1504; 1519; 1561; 1582; 1628; 1697; 1708; 1761; 1764; 1823; 1885; 1892; 1903; 1966; 2228; 2302; 2369; 2380; 2428; 2497; 2508; 2556; 2818; 2825; 2869; 2890; 3017; 3024; 3065; 3086; 3270; 3277; 3898; 3964; 3967; 41…	199	86
Ahnak	66395	569007630	XP_006527317.1	neuroblast differentiation-associated protein AHNAK isoform X2 [Mus musculus]	790	[K].APKISMPDIDLNLKGPK.[V]	APkISMPDIDLNLKGPK	[K3](Biotin)	693.706	3	2497	2	EMNIKAPkISMPDID	569007630	1	1	1	1	688.372	688.374	693.706	688.374	3	3	3	3	2	2	3	2	2.90751e+06	2.98278e+06	1.60065e+06	1.57922e+06	4	5	129; 204; 245; 265; 503; 519; 633; 697; 816; 944; 996; 1053; 1065; 1183; 1267; 1309; 1319; 1328; 1384; 1391; 1445; 1504; 1519; 1561; 1612; 1628; 1708; 1761; 1764; 1885; 1892; 1903; 1966; 2228; 2239; 2302; 2369; 2380; 2497; 2508; 2556; 2818; 2825; 3024; 3065; 3277; 3898; 4169; 4303; 4559; 4616; 4637; 4640; 4948; 5045; 5050; 5329; 5453	119	58	129; 172; 184; 204; 245; 265; 393; 503; 519; 543; 633; 697; 762; 816; 890; 944; 996; 1011; 1053; 1065; 1076; 1081; 1139; 1183; 1193; 1252; 1260; 1267; 1309; 1319; 1328; 1384; 1391; 1445; 1504; 1519; 1561; 1582; 1628; 1697; 1708; 1761; 1764; 1823; 1885; 1892; 1903; 1966; 2228; 2302; 2369; 2380; 2428; 2497; 2508; 2556; 2818; 2825; 2869; 2890; 3017; 3024; 3065; 3086; 3270; 3277; 3898; 3964; 3967; 41…	199	86
Ahnak	66395	569007630	XP_006527317.1	neuroblast differentiation-associated protein AHNAK isoform X2 [Mus musculus]	790	[K].ISMPDVDLNFKGPK.[L]	ISMPDVDLNFkGPK	[K11](Biotin)	893.949	3	1903	1	PDVDLNFkGPKLKGE	569007630	1	1	1	1	596.301	596.3	893.949	596.302	3	3	2	3	2	1	2	1	162042	63399.4	84620.9	55093.2	3	3	129; 204; 245; 265; 503; 519; 633; 697; 816; 944; 996; 1053; 1065; 1183; 1267; 1309; 1319; 1328; 1384; 1391; 1445; 1504; 1519; 1561; 1612; 1628; 1708; 1761; 1764; 1885; 1892; 1903; 1966; 2228; 2239; 2302; 2369; 2380; 2497; 2508; 2556; 2818; 2825; 3024; 3065; 3277; 3898; 4169; 4303; 4559; 4616; 4637; 4640; 4948; 5045; 5050; 5329; 5453	119	58	129; 172; 184; 204; 245; 265; 393; 503; 519; 543; 633; 697; 762; 816; 890; 944; 996; 1011; 1053; 1065; 1076; 1081; 1139; 1183; 1193; 1252; 1260; 1267; 1309; 1319; 1328; 1384; 1391; 1445; 1504; 1519; 1561; 1582; 1628; 1697; 1708; 1761; 1764; 1823; 1885; 1892; 1903; 1966; 2228; 2302; 2369; 2380; 2428; 2497; 2508; 2556; 2818; 2825; 2869; 2890; 3017; 3024; 3065; 3086; 3270; 3277; 3898; 3964; 3967; 41…	199	86
Ahnak	66395	569007630	XP_006527317.1	neuroblast differentiation-associated protein AHNAK isoform X2 [Mus musculus]	790	[K].ISMQDVDLSLGSCKLK.[G]	ISMQDVDLSLGSCkLK	[K14](Biotin)	674.003	3	519	1	DLSLGSCkLKGNMKT	569007630	1	1	1	0	674.003	674.003	674.002		3	3	3		1	1	1	0	90887.1	84875.2	46659.9	0	2	1	129; 204; 245; 265; 503; 519; 633; 697; 816; 944; 996; 1053; 1065; 1183; 1267; 1309; 1319; 1328; 1384; 1391; 1445; 1504; 1519; 1561; 1612; 1628; 1708; 1761; 1764; 1885; 1892; 1903; 1966; 2228; 2239; 2302; 2369; 2380; 2497; 2508; 2556; 2818; 2825; 3024; 3065; 3277; 3898; 4169; 4303; 4559; 4616; 4637; 4640; 4948; 5045; 5050; 5329; 5453	119	58	129; 172; 184; 204; 245; 265; 393; 503; 519; 543; 633; 697; 762; 816; 890; 944; 996; 1011; 1053; 1065; 1076; 1081; 1139; 1183; 1193; 1252; 1260; 1267; 1309; 1319; 1328; 1384; 1391; 1445; 1504; 1519; 1561; 1582; 1628; 1697; 1708; 1761; 1764; 1823; 1885; 1892; 1903; 1966; 2228; 2302; 2369; 2380; 2428; 2497; 2508; 2556; 2818; 2825; 2869; 2890; 3017; 3024; 3065; 3086; 3270; 3277; 3898; 3964; 3967; 41…	199	86
Ahnak	66395	569007630	XP_006527317.1	neuroblast differentiation-associated protein AHNAK isoform X2 [Mus musculus]	790	[K].FSMPTLKGEGPDVDVSLPK.[A]	FSMPTLkGEGPDVDVSLPK	[K7](Biotin)	748.374	3	1139	1	KFSMPTLkGEGPDVD	569007630	1	0	0	0	748.374				3				1	0	0	0	68421.4	0	0	0	1	0	129; 204; 245; 265; 503; 519; 633; 697; 816; 944; 996; 1053; 1065; 1183; 1267; 1309; 1319; 1328; 1384; 1391; 1445; 1504; 1519; 1561; 1612; 1628; 1708; 1761; 1764; 1885; 1892; 1903; 1966; 2228; 2239; 2302; 2369; 2380; 2497; 2508; 2556; 2818; 2825; 3024; 3065; 3277; 3898; 4169; 4303; 4559; 4616; 4637; 4640; 4948; 5045; 5050; 5329; 5453	119	58	129; 172; 184; 204; 245; 265; 393; 503; 519; 543; 633; 697; 762; 816; 890; 944; 996; 1011; 1053; 1065; 1076; 1081; 1139; 1183; 1193; 1252; 1260; 1267; 1309; 1319; 1328; 1384; 1391; 1445; 1504; 1519; 1561; 1582; 1628; 1697; 1708; 1761; 1764; 1823; 1885; 1892; 1903; 1966; 2228; 2302; 2369; 2380; 2428; 2497; 2508; 2556; 2818; 2825; 2869; 2890; 3017; 3024; 3065; 3086; 3270; 3277; 3898; 3964; 3967; 41…	199	86
Ahnak	66395	569007630	XP_006527317.1	neuroblast differentiation-associated protein AHNAK isoform X2 [Mus musculus]	790	[R].EGVKDIDITSPEFMIK.[I]	EGVkDIDITSPEFMIK	[K4](Biotin)	683.342	3	172	1	VTGREGVkDIDITSP	569007630	1	1	0	0	683.342	683.342			3	3			2	1	0	0	93577.1	52383.9	0	0	3	0	129; 204; 245; 265; 503; 519; 633; 697; 816; 944; 996; 1053; 1065; 1183; 1267; 1309; 1319; 1328; 1384; 1391; 1445; 1504; 1519; 1561; 1612; 1628; 1708; 1761; 1764; 1885; 1892; 1903; 1966; 2228; 2239; 2302; 2369; 2380; 2497; 2508; 2556; 2818; 2825; 3024; 3065; 3277; 3898; 4169; 4303; 4559; 4616; 4637; 4640; 4948; 5045; 5050; 5329; 5453	119	58	129; 172; 184; 204; 245; 265; 393; 503; 519; 543; 633; 697; 762; 816; 890; 944; 996; 1011; 1053; 1065; 1076; 1081; 1139; 1183; 1193; 1252; 1260; 1267; 1309; 1319; 1328; 1384; 1391; 1445; 1504; 1519; 1561; 1582; 1628; 1697; 1708; 1761; 1764; 1823; 1885; 1892; 1903; 1966; 2228; 2302; 2369; 2380; 2428; 2497; 2508; 2556; 2818; 2825; 2869; 2890; 3017; 3024; 3065; 3086; 3270; 3277; 3898; 3964; 3967; 41…	199	86
Ahnak	66395	569007630	XP_006527317.1	neuroblast differentiation-associated protein AHNAK isoform X2 [Mus musculus]	790	[K].MPKFSMPGFKAEGPEVDVNLPK.[AV]	MPkFSMPGFKAEGPEVDVNLPK	[K3](Biotin)	882.105	3	1384	2	MPKMKMPkFSMPGFK	569007630	1	1	0	1	882.105	882.105		882.104	3	3		3	1	1	0	1	166320	139145	0	98658.7	2	1	129; 204; 245; 265; 503; 519; 633; 697; 816; 944; 996; 1053; 1065; 1183; 1267; 1309; 1319; 1328; 1384; 1391; 1445; 1504; 1519; 1561; 1612; 1628; 1708; 1761; 1764; 1885; 1892; 1903; 1966; 2228; 2239; 2302; 2369; 2380; 2497; 2508; 2556; 2818; 2825; 3024; 3065; 3277; 3898; 4169; 4303; 4559; 4616; 4637; 4640; 4948; 5045; 5050; 5329; 5453	119	58	129; 172; 184; 204; 245; 265; 393; 503; 519; 543; 633; 697; 762; 816; 890; 944; 996; 1011; 1053; 1065; 1076; 1081; 1139; 1183; 1193; 1252; 1260; 1267; 1309; 1319; 1328; 1384; 1391; 1445; 1504; 1519; 1561; 1582; 1628; 1697; 1708; 1761; 1764; 1823; 1885; 1892; 1903; 1966; 2228; 2302; 2369; 2380; 2428; 2497; 2508; 2556; 2818; 2825; 2869; 2890; 3017; 3024; 3065; 3086; 3270; 3277; 3898; 3964; 3967; 41…	199	86
Ahnak	66395	569007630	XP_006527317.1	neuroblast differentiation-associated protein AHNAK isoform X2 [Mus musculus]	790	[K].ISMPEIDLNLKGPK.[L]	ISMPEIDLNLKGPK	[K](Biotin)			X	1
Ahnak	66395	569007630	XP_006527317.1	neuroblast differentiation-associated protein AHNAK isoform X2 [Mus musculus]	790	[K].FSMPSLKGEGPELDVNMPK.[A]	FSMPSLkGEGPELDVNMPK	[K7](Biotin)	768.036	3	1011	1	KFSMPSLkGEGPELD	569007630	1	0	0	0	768.036				3				1	0	0	0	57235.3	0	0	0	1	0	129; 204; 245; 265; 503; 519; 633; 697; 816; 944; 996; 1053; 1065; 1183; 1267; 1309; 1319; 1328; 1384; 1391; 1445; 1504; 1519; 1561; 1612; 1628; 1708; 1761; 1764; 1885; 1892; 1903; 1966; 2228; 2239; 2302; 2369; 2380; 2497; 2508; 2556; 2818; 2825; 3024; 3065; 3277; 3898; 4169; 4303; 4559; 4616; 4637; 4640; 4948; 5045; 5050; 5329; 5453	119	58	129; 172; 184; 204; 245; 265; 393; 503; 519; 543; 633; 697; 762; 816; 890; 944; 996; 1011; 1053; 1065; 1076; 1081; 1139; 1183; 1193; 1252; 1260; 1267; 1309; 1319; 1328; 1384; 1391; 1445; 1504; 1519; 1561; 1582; 1628; 1697; 1708; 1761; 1764; 1823; 1885; 1892; 1903; 1966; 2228; 2302; 2369; 2380; 2428; 2497; 2508; 2556; 2818; 2825; 2869; 2890; 3017; 3024; 3065; 3086; 3270; 3277; 3898; 3964; 3967; 41…	199	86
Ahnak	66395	569007630	XP_006527317.1	neuroblast differentiation-associated protein AHNAK isoform X2 [Mus musculus]	790	[K].ISMPDFDLNLKGPK.[V]	ISMPDFDLNLkGPK	[K11](Biotin)	600.972	3	4180	1	PDFDLNLkGPKVKGD	569007630	1	1	0	0	600.972	600.972			3	3			1	1	0	0	81107.8	57483.5	0	0	2	0	129; 204; 245; 265; 503; 519; 633; 697; 816; 944; 996; 1053; 1065; 1183; 1267; 1309; 1319; 1328; 1384; 1391; 1445; 1504; 1519; 1561; 1612; 1628; 1708; 1761; 1764; 1885; 1892; 1903; 1966; 2228; 2239; 2302; 2369; 2380; 2497; 2508; 2556; 2818; 2825; 3024; 3065; 3277; 3898; 4169; 4303; 4559; 4616; 4637; 4640; 4948; 5045; 5050; 5329; 5453	119	58	129; 172; 184; 204; 245; 265; 393; 503; 519; 543; 633; 697; 762; 816; 890; 944; 996; 1011; 1053; 1065; 1076; 1081; 1139; 1183; 1193; 1252; 1260; 1267; 1309; 1319; 1328; 1384; 1391; 1445; 1504; 1519; 1561; 1582; 1628; 1697; 1708; 1761; 1764; 1823; 1885; 1892; 1903; 1966; 2228; 2302; 2369; 2380; 2428; 2497; 2508; 2556; 2818; 2825; 2869; 2890; 3017; 3024; 3065; 3086; 3270; 3277; 3898; 3964; 3967; 41…	199	86
Ahnak	66395	569007630	XP_006527317.1	neuroblast differentiation-associated protein AHNAK isoform X2 [Mus musculus]	790	[K].ISMPDIDLNLKGPK.[V]	ISMPDIDLNLkGPK	[K11](Biotin)	883.965	3	2508	1	PDIDLNLkGPKVKGD	569007630	1	1	1	0	589.645	589.646	883.965		3	3	2		2	1	2	0	893511	432653	199066	0	3	2	129; 204; 245; 265; 503; 519; 633; 697; 816; 944; 996; 1053; 1065; 1183; 1267; 1309; 1319; 1328; 1384; 1391; 1445; 1504; 1519; 1561; 1612; 1628; 1708; 1761; 1764; 1885; 1892; 1903; 1966; 2228; 2239; 2302; 2369; 2380; 2497; 2508; 2556; 2818; 2825; 3024; 3065; 3277; 3898; 4169; 4303; 4559; 4616; 4637; 4640; 4948; 5045; 5050; 5329; 5453	119	58	129; 172; 184; 204; 245; 265; 393; 503; 519; 543; 633; 697; 762; 816; 890; 944; 996; 1011; 1053; 1065; 1076; 1081; 1139; 1183; 1193; 1252; 1260; 1267; 1309; 1319; 1328; 1384; 1391; 1445; 1504; 1519; 1561; 1582; 1628; 1697; 1708; 1761; 1764; 1823; 1885; 1892; 1903; 1966; 2228; 2302; 2369; 2380; 2428; 2497; 2508; 2556; 2818; 2825; 2869; 2890; 3017; 3024; 3065; 3086; 3270; 3277; 3898; 3964; 3967; 41…	199	86
Ahnak	66395	569007630	XP_006527317.1	neuroblast differentiation-associated protein AHNAK isoform X2 [Mus musculus]	790	[K].APKISMPDVDLELKGPK.[V]	APkISMPDVDLELKGPK	[K3](Biotin)	688.702	3	4559	2	EINIKAPkISMPDVD	569007630	1	1	1	0	688.702	688.701	688.701		3	3	3		1	1	1	0	246129	247374	85447.6	0	2	1	129; 204; 245; 265; 503; 519; 633; 697; 816; 944; 996; 1053; 1065; 1183; 1267; 1309; 1319; 1328; 1384; 1391; 1445; 1504; 1519; 1561; 1612; 1628; 1708; 1761; 1764; 1885; 1892; 1903; 1966; 2228; 2239; 2302; 2369; 2380; 2497; 2508; 2556; 2818; 2825; 3024; 3065; 3277; 3898; 4169; 4303; 4559; 4616; 4637; 4640; 4948; 5045; 5050; 5329; 5453	119	58	129; 172; 184; 204; 245; 265; 393; 503; 519; 543; 633; 697; 762; 816; 890; 944; 996; 1011; 1053; 1065; 1076; 1081; 1139; 1183; 1193; 1252; 1260; 1267; 1309; 1319; 1328; 1384; 1391; 1445; 1504; 1519; 1561; 1582; 1628; 1697; 1708; 1761; 1764; 1823; 1885; 1892; 1903; 1966; 2228; 2302; 2369; 2380; 2428; 2497; 2508; 2556; 2818; 2825; 2869; 2890; 3017; 3024; 3065; 3086; 3270; 3277; 3898; 3964; 3967; 41…	199	86
Ahnak	66395	569007630	XP_006527317.1	neuroblast differentiation-associated protein AHNAK isoform X2 [Mus musculus]	790	[K].VSLPDVDLDLKGPK.[M]	VSLPDVDLDLkGPK	[K11](Biotin)	574.643	3	1076	1	PDVDLDLkGPKMKGN	569007630	1	1	0	0	574.643	574.643			3	3			1	1	0	0	66298.7	69633.2	0	0	2	0	129; 204; 245; 265; 503; 519; 633; 697; 816; 944; 996; 1053; 1065; 1183; 1267; 1309; 1319; 1328; 1384; 1391; 1445; 1504; 1519; 1561; 1612; 1628; 1708; 1761; 1764; 1885; 1892; 1903; 1966; 2228; 2239; 2302; 2369; 2380; 2497; 2508; 2556; 2818; 2825; 3024; 3065; 3277; 3898; 4169; 4303; 4559; 4616; 4637; 4640; 4948; 5045; 5050; 5329; 5453	119	58	129; 172; 184; 204; 245; 265; 393; 503; 519; 543; 633; 697; 762; 816; 890; 944; 996; 1011; 1053; 1065; 1076; 1081; 1139; 1183; 1193; 1252; 1260; 1267; 1309; 1319; 1328; 1384; 1391; 1445; 1504; 1519; 1561; 1582; 1628; 1697; 1708; 1761; 1764; 1823; 1885; 1892; 1903; 1966; 2228; 2302; 2369; 2380; 2428; 2497; 2508; 2556; 2818; 2825; 2869; 2890; 3017; 3024; 3065; 3086; 3270; 3277; 3898; 3964; 3967; 41…	199	86
Ahnak	66395	569007630	XP_006527317.1	neuroblast differentiation-associated protein AHNAK isoform X2 [Mus musculus]	790	[K].VDIDVPDVDVHGPDWHLKMPK.[IV]	VDIDVPDVDVHGPDWHLKMPK	[K](Biotin)			X	1
Ahnak	66395	569007630	XP_006527317.1	neuroblast differentiation-associated protein AHNAK isoform X2 [Mus musculus]	790	[R].FKLPKFNFSGSK.[V]	FKLPkFNFSGSK	[K5](Biotin)	542.622	3	3017	2	KSRFKLPkFNFSGSK	569007630	1	1	0	0	542.622	542.622			3	3			1	1	0	0	70096.9	102034	0	0	2	0	129; 204; 245; 265; 503; 519; 633; 697; 816; 944; 996; 1053; 1065; 1183; 1267; 1309; 1319; 1328; 1384; 1391; 1445; 1504; 1519; 1561; 1612; 1628; 1708; 1761; 1764; 1885; 1892; 1903; 1966; 2228; 2239; 2302; 2369; 2380; 2497; 2508; 2556; 2818; 2825; 3024; 3065; 3277; 3898; 4169; 4303; 4559; 4616; 4637; 4640; 4948; 5045; 5050; 5329; 5453	119	58	129; 172; 184; 204; 245; 265; 393; 503; 519; 543; 633; 697; 762; 816; 890; 944; 996; 1011; 1053; 1065; 1076; 1081; 1139; 1183; 1193; 1252; 1260; 1267; 1309; 1319; 1328; 1384; 1391; 1445; 1504; 1519; 1561; 1582; 1628; 1697; 1708; 1761; 1764; 1823; 1885; 1892; 1903; 1966; 2228; 2302; 2369; 2380; 2428; 2497; 2508; 2556; 2818; 2825; 2869; 2890; 3017; 3024; 3065; 3086; 3270; 3277; 3898; 3964; 3967; 41…	199	86
Ahnak	66395	569007630	XP_006527317.1	neuroblast differentiation-associated protein AHNAK isoform X2 [Mus musculus]	790	[K].MPKFSMPGFKGEGPEVDVNLPK.[A]	MPkFSMPGFKGEGPEVDVNLPK	[K3](Biotin)	877.435	3	2818	2	MPKVKMPkFSMPGFK	569007630	1	1	0	1	877.431	877.435		877.435	3	3		3	1	1	0	1	132895	138896	0	178238	2	1	129; 204; 245; 265; 503; 519; 633; 697; 816; 944; 996; 1053; 1065; 1183; 1267; 1309; 1319; 1328; 1384; 1391; 1445; 1504; 1519; 1561; 1612; 1628; 1708; 1761; 1764; 1885; 1892; 1903; 1966; 2228; 2239; 2302; 2369; 2380; 2497; 2508; 2556; 2818; 2825; 3024; 3065; 3277; 3898; 4169; 4303; 4559; 4616; 4637; 4640; 4948; 5045; 5050; 5329; 5453	119	58	129; 172; 184; 204; 245; 265; 393; 503; 519; 543; 633; 697; 762; 816; 890; 944; 996; 1011; 1053; 1065; 1076; 1081; 1139; 1183; 1193; 1252; 1260; 1267; 1309; 1319; 1328; 1384; 1391; 1445; 1504; 1519; 1561; 1582; 1628; 1697; 1708; 1761; 1764; 1823; 1885; 1892; 1903; 1966; 2228; 2302; 2369; 2380; 2428; 2497; 2508; 2556; 2818; 2825; 2869; 2890; 3017; 3024; 3065; 3086; 3270; 3277; 3898; 3964; 3967; 41…	199	86
Ahnak	66395	569007630	XP_006527317.1	neuroblast differentiation-associated protein AHNAK isoform X2 [Mus musculus]	790	[K].APKISMPDVDLHLKGPK.[V]	APkISMPDVDLHLKGPK	[K3](Biotin)	522.78	4	1966	2	DMHFKAPkISMPDVD	569007630	1	1	1	1	522.78	518.781	518.781	518.781	4	4	4	4	2	2	2	1	2.94466e+06	2.59212e+06	2.41695e+06	1.41104e+06	4	3	129; 204; 245; 265; 503; 519; 633; 697; 816; 944; 996; 1053; 1065; 1183; 1267; 1309; 1319; 1328; 1384; 1391; 1445; 1504; 1519; 1561; 1612; 1628; 1708; 1761; 1764; 1885; 1892; 1903; 1966; 2228; 2239; 2302; 2369; 2380; 2497; 2508; 2556; 2818; 2825; 3024; 3065; 3277; 3898; 4169; 4303; 4559; 4616; 4637; 4640; 4948; 5045; 5050; 5329; 5453	119	58	129; 172; 184; 204; 245; 265; 393; 503; 519; 543; 633; 697; 762; 816; 890; 944; 996; 1011; 1053; 1065; 1076; 1081; 1139; 1183; 1193; 1252; 1260; 1267; 1309; 1319; 1328; 1384; 1391; 1445; 1504; 1519; 1561; 1582; 1628; 1697; 1708; 1761; 1764; 1823; 1885; 1892; 1903; 1966; 2228; 2302; 2369; 2380; 2428; 2497; 2508; 2556; 2818; 2825; 2869; 2890; 3017; 3024; 3065; 3086; 3270; 3277; 3898; 3964; 3967; 41…	199	86
Ahnak	66395	569007630	XP_006527317.1	neuroblast differentiation-associated protein AHNAK isoform X2 [Mus musculus]	790	[R].EGVKDIDITSPEFMIKIPR.[H]	EGVKDIDITSPEFMIkIPR	[K16](Biotin)	805.423	3	184	2	TSPEFMIkIPRHEVT	569007630	1	1	0	0	805.421	805.423			3	3			1	1	0	0	105128	97708.3	0	0	2	0	129; 204; 245; 265; 503; 519; 633; 697; 816; 944; 996; 1053; 1065; 1183; 1267; 1309; 1319; 1328; 1384; 1391; 1445; 1504; 1519; 1561; 1612; 1628; 1708; 1761; 1764; 1885; 1892; 1903; 1966; 2228; 2239; 2302; 2369; 2380; 2497; 2508; 2556; 2818; 2825; 3024; 3065; 3277; 3898; 4169; 4303; 4559; 4616; 4637; 4640; 4948; 5045; 5050; 5329; 5453	119	58	129; 172; 184; 204; 245; 265; 393; 503; 519; 543; 633; 697; 762; 816; 890; 944; 996; 1011; 1053; 1065; 1076; 1081; 1139; 1183; 1193; 1252; 1260; 1267; 1309; 1319; 1328; 1384; 1391; 1445; 1504; 1519; 1561; 1582; 1628; 1697; 1708; 1761; 1764; 1823; 1885; 1892; 1903; 1966; 2228; 2302; 2369; 2380; 2428; 2497; 2508; 2556; 2818; 2825; 2869; 2890; 3017; 3024; 3065; 3086; 3270; 3277; 3898; 3964; 3967; 41…	199	86
Ahnak	66395	569007630	XP_006527317.1	neuroblast differentiation-associated protein AHNAK isoform X2 [Mus musculus]	790	[K].MPKFSMPGFKGEGPEVDVSLPK.[A]	MPkFSMPGFKGEGPEVDVSLPK	[K3](Biotin)	868.43	3	3270	2	MPKVKMPkFSMPGFK	569007630	1	1	0	0	868.429	868.43			3	3			1	1	0	0	175048	113469	0	0	2	0	129; 204; 245; 265; 503; 519; 633; 697; 816; 944; 996; 1053; 1065; 1183; 1267; 1309; 1319; 1328; 1384; 1391; 1445; 1504; 1519; 1561; 1612; 1628; 1708; 1761; 1764; 1885; 1892; 1903; 1966; 2228; 2239; 2302; 2369; 2380; 2497; 2508; 2556; 2818; 2825; 3024; 3065; 3277; 3898; 4169; 4303; 4559; 4616; 4637; 4640; 4948; 5045; 5050; 5329; 5453	119	58	129; 172; 184; 204; 245; 265; 393; 503; 519; 543; 633; 697; 762; 816; 890; 944; 996; 1011; 1053; 1065; 1076; 1081; 1139; 1183; 1193; 1252; 1260; 1267; 1309; 1319; 1328; 1384; 1391; 1445; 1504; 1519; 1561; 1582; 1628; 1697; 1708; 1761; 1764; 1823; 1885; 1892; 1903; 1966; 2228; 2302; 2369; 2380; 2428; 2497; 2508; 2556; 2818; 2825; 2869; 2890; 3017; 3024; 3065; 3086; 3270; 3277; 3898; 3964; 3967; 41…	199	86
Ahnak	66395	569007630	XP_006527317.1	neuroblast differentiation-associated protein AHNAK isoform X2 [Mus musculus]	790	[K].VDVSVPDVDVHGPDWNLKMPK.[I]	VDVSVPDVDVHGPDWNLkMPK	[K18](Biotin)	858.424	3	996	1	HGPDWNLkMPKIKMP	569007630	1	1	0	1	858.424	858.422		858.424	3	3		3	1	1	0	1	460544	528749	0	451958	2	1	129; 204; 245; 265; 503; 519; 633; 697; 816; 944; 996; 1053; 1065; 1183; 1267; 1309; 1319; 1328; 1384; 1391; 1445; 1504; 1519; 1561; 1612; 1628; 1708; 1761; 1764; 1885; 1892; 1903; 1966; 2228; 2239; 2302; 2369; 2380; 2497; 2508; 2556; 2818; 2825; 3024; 3065; 3277; 3898; 4169; 4303; 4559; 4616; 4637; 4640; 4948; 5045; 5050; 5329; 5453	119	58	129; 172; 184; 204; 245; 265; 393; 503; 519; 543; 633; 697; 762; 816; 890; 944; 996; 1011; 1053; 1065; 1076; 1081; 1139; 1183; 1193; 1252; 1260; 1267; 1309; 1319; 1328; 1384; 1391; 1445; 1504; 1519; 1561; 1582; 1628; 1697; 1708; 1761; 1764; 1823; 1885; 1892; 1903; 1966; 2228; 2302; 2369; 2380; 2428; 2497; 2508; 2556; 2818; 2825; 2869; 2890; 3017; 3024; 3065; 3086; 3270; 3277; 3898; 3964; 3967; 41…	199	86
Ahnak	66395	569007630	XP_006527317.1	neuroblast differentiation-associated protein AHNAK isoform X2 [Mus musculus]	790	[K].MDISAPDVEVHGPEWNLKMPK.[F]	MDISAPDVEVHGPEWNLkMPK	[K18](Biotin)	873.753	3	633	1	HGPEWNLkMPKFSVP	569007630	1	1	0	1	873.752	873.753		873.753	3	3		3	1	2	0	1	430912	828325	0	336697	3	1	129; 204; 245; 265; 503; 519; 633; 697; 816; 944; 996; 1053; 1065; 1183; 1267; 1309; 1319; 1328; 1384; 1391; 1445; 1504; 1519; 1561; 1612; 1628; 1708; 1761; 1764; 1885; 1892; 1903; 1966; 2228; 2239; 2302; 2369; 2380; 2497; 2508; 2556; 2818; 2825; 3024; 3065; 3277; 3898; 4169; 4303; 4559; 4616; 4637; 4640; 4948; 5045; 5050; 5329; 5453	119	58	129; 172; 184; 204; 245; 265; 393; 503; 519; 543; 633; 697; 762; 816; 890; 944; 996; 1011; 1053; 1065; 1076; 1081; 1139; 1183; 1193; 1252; 1260; 1267; 1309; 1319; 1328; 1384; 1391; 1445; 1504; 1519; 1561; 1582; 1628; 1697; 1708; 1761; 1764; 1823; 1885; 1892; 1903; 1966; 2228; 2302; 2369; 2380; 2428; 2497; 2508; 2556; 2818; 2825; 2869; 2890; 3017; 3024; 3065; 3086; 3270; 3277; 3898; 3964; 3967; 41…	199	86
Ahnak	66395	569007630	XP_006527317.1	neuroblast differentiation-associated protein AHNAK isoform X2 [Mus musculus]	790	[K].ITGPDANVHLKTPK.[V]	ITGPDANVHLkTPK	[K11](Biotin)	572.976	3	4637	1	PDANVHLkTPKVGIS	569007630	1	0	0	1	572.975			572.976	3			3	1	0	0	1	418903	0	0	206779	1	1	129; 204; 245; 265; 503; 519; 633; 697; 816; 944; 996; 1053; 1065; 1183; 1267; 1309; 1319; 1328; 1384; 1391; 1445; 1504; 1519; 1561; 1612; 1628; 1708; 1761; 1764; 1885; 1892; 1903; 1966; 2228; 2239; 2302; 2369; 2380; 2497; 2508; 2556; 2818; 2825; 3024; 3065; 3277; 3898; 4169; 4303; 4559; 4616; 4637; 4640; 4948; 5045; 5050; 5329; 5453	119	58	129; 172; 184; 204; 245; 265; 393; 503; 519; 543; 633; 697; 762; 816; 890; 944; 996; 1011; 1053; 1065; 1076; 1081; 1139; 1183; 1193; 1252; 1260; 1267; 1309; 1319; 1328; 1384; 1391; 1445; 1504; 1519; 1561; 1582; 1628; 1697; 1708; 1761; 1764; 1823; 1885; 1892; 1903; 1966; 2228; 2302; 2369; 2380; 2428; 2497; 2508; 2556; 2818; 2825; 2869; 2890; 3017; 3024; 3065; 3086; 3270; 3277; 3898; 3964; 3967; 41…	199	86
Ahnak	66395	569007630	XP_006527317.1	neuroblast differentiation-associated protein AHNAK isoform X2 [Mus musculus]	790	[K].GPKVDIDVPDVDVHGPDWHLKMPK.[IV]	GPKVDIDVPDVDVHGPDWHLkMPK	[K21](Biotin)	730.87	4	2556	2	HGPDWHLkMPKIKMP	569007630	1	1	0	1	730.864	730.87		730.87	4	4		4	3	3	0	2	645995	1.54422e+06	0	861772	6	2	129; 204; 245; 265; 503; 519; 633; 697; 816; 944; 996; 1053; 1065; 1183; 1267; 1309; 1319; 1328; 1384; 1391; 1445; 1504; 1519; 1561; 1612; 1628; 1708; 1761; 1764; 1885; 1892; 1903; 1966; 2228; 2239; 2302; 2369; 2380; 2497; 2508; 2556; 2818; 2825; 3024; 3065; 3277; 3898; 4169; 4303; 4559; 4616; 4637; 4640; 4948; 5045; 5050; 5329; 5453	119	58	129; 172; 184; 204; 245; 265; 393; 503; 519; 543; 633; 697; 762; 816; 890; 944; 996; 1011; 1053; 1065; 1076; 1081; 1139; 1183; 1193; 1252; 1260; 1267; 1309; 1319; 1328; 1384; 1391; 1445; 1504; 1519; 1561; 1582; 1628; 1697; 1708; 1761; 1764; 1823; 1885; 1892; 1903; 1966; 2228; 2302; 2369; 2380; 2428; 2497; 2508; 2556; 2818; 2825; 2869; 2890; 3017; 3024; 3065; 3086; 3270; 3277; 3898; 3964; 3967; 41…	199	86
Ahnak	66395	569007630	XP_006527317.1	neuroblast differentiation-associated protein AHNAK isoform X2 [Mus musculus]	790	[K].FSLPKISAPGVK.[M]	FSLPkISAPGVK	[K5](Biotin)	490.611	3	4953	1	FPKFSLPkISAPGVK	569007630	1	1	0	0	490.611	490.611			3	3			1	1	0	0	142435	137381	0	0	2	0	129; 204; 245; 265; 503; 519; 633; 697; 816; 944; 996; 1053; 1065; 1183; 1267; 1309; 1319; 1328; 1384; 1391; 1445; 1504; 1519; 1561; 1612; 1628; 1708; 1761; 1764; 1885; 1892; 1903; 1966; 2228; 2239; 2302; 2369; 2380; 2497; 2508; 2556; 2818; 2825; 3024; 3065; 3277; 3898; 4169; 4303; 4559; 4616; 4637; 4640; 4948; 5045; 5050; 5329; 5453	119	58	129; 172; 184; 204; 245; 265; 393; 503; 519; 543; 633; 697; 762; 816; 890; 944; 996; 1011; 1053; 1065; 1076; 1081; 1139; 1183; 1193; 1252; 1260; 1267; 1309; 1319; 1328; 1384; 1391; 1445; 1504; 1519; 1561; 1582; 1628; 1697; 1708; 1761; 1764; 1823; 1885; 1892; 1903; 1966; 2228; 2302; 2369; 2380; 2428; 2497; 2508; 2556; 2818; 2825; 2869; 2890; 3017; 3024; 3065; 3086; 3270; 3277; 3898; 3964; 3967; 41…	199	86
Ahnak	66395	569007630	XP_006527317.1	neuroblast differentiation-associated protein AHNAK isoform X2 [Mus musculus]	790	[K].MDISAPDVDVHGPDWHLKMPK.[V]	MDISAPDVDVHGPDWHLkMPK	[K18](Biotin)	654.313	4	3898	1	HGPDWHLkMPKVKMP	569007630	0	1	0	1		654.313		654.312		4		4	0	1	0	1	0	700189	0	464948	1	1	129; 204; 245; 265; 503; 519; 633; 697; 816; 944; 996; 1053; 1065; 1183; 1267; 1309; 1319; 1328; 1384; 1391; 1445; 1504; 1519; 1561; 1612; 1628; 1708; 1761; 1764; 1885; 1892; 1903; 1966; 2228; 2239; 2302; 2369; 2380; 2497; 2508; 2556; 2818; 2825; 3024; 3065; 3277; 3898; 4169; 4303; 4559; 4616; 4637; 4640; 4948; 5045; 5050; 5329; 5453	119	58	129; 172; 184; 204; 245; 265; 393; 503; 519; 543; 633; 697; 762; 816; 890; 944; 996; 1011; 1053; 1065; 1076; 1081; 1139; 1183; 1193; 1252; 1260; 1267; 1309; 1319; 1328; 1384; 1391; 1445; 1504; 1519; 1561; 1582; 1628; 1697; 1708; 1761; 1764; 1823; 1885; 1892; 1903; 1966; 2228; 2302; 2369; 2380; 2428; 2497; 2508; 2556; 2818; 2825; 2869; 2890; 3017; 3024; 3065; 3086; 3270; 3277; 3898; 3964; 3967; 41…	199	86
Ahnak	66395	569007630	XP_006527317.1	neuroblast differentiation-associated protein AHNAK isoform X2 [Mus musculus]	790	[K].GPKVDIDVPDVDVHGPDWHLKMPK.[IV]	GPKVDIDVPDVDVHGPDWHLkMPK	[K21](Biotin)	730.87	4	2556	2	HGPDWHLkMPKIKMP	569007630	1	1	0	1	730.864	730.87		730.87	4	4		4	3	3	0	2	645995	1.54422e+06	0	861772	6	2	129; 204; 245; 265; 503; 519; 633; 697; 816; 944; 996; 1053; 1065; 1183; 1267; 1309; 1319; 1328; 1384; 1391; 1445; 1504; 1519; 1561; 1612; 1628; 1708; 1761; 1764; 1885; 1892; 1903; 1966; 2228; 2239; 2302; 2369; 2380; 2497; 2508; 2556; 2818; 2825; 3024; 3065; 3277; 3898; 4169; 4303; 4559; 4616; 4637; 4640; 4948; 5045; 5050; 5329; 5453	119	58	129; 172; 184; 204; 245; 265; 393; 503; 519; 543; 633; 697; 762; 816; 890; 944; 996; 1011; 1053; 1065; 1076; 1081; 1139; 1183; 1193; 1252; 1260; 1267; 1309; 1319; 1328; 1384; 1391; 1445; 1504; 1519; 1561; 1582; 1628; 1697; 1708; 1761; 1764; 1823; 1885; 1892; 1903; 1966; 2228; 2302; 2369; 2380; 2428; 2497; 2508; 2556; 2818; 2825; 2869; 2890; 3017; 3024; 3065; 3086; 3270; 3277; 3898; 3964; 3967; 41…	199	86
Ahnak	66395	569007630	XP_006527317.1	neuroblast differentiation-associated protein AHNAK isoform X2 [Mus musculus]	790	[K].VSMPDVELNLKGPK.[V]	VSMPDVELNLkGPK	[K11](Biotin)	584.973	3	3086	1	PDVELNLkGPKVKGD	569007630	1	1	0	0	584.973	584.973			3	3			1	1	0	0	83644	93394.8	0	0	2	0	129; 204; 245; 265; 503; 519; 633; 697; 816; 944; 996; 1053; 1065; 1183; 1267; 1309; 1319; 1328; 1384; 1391; 1445; 1504; 1519; 1561; 1612; 1628; 1708; 1761; 1764; 1885; 1892; 1903; 1966; 2228; 2239; 2302; 2369; 2380; 2497; 2508; 2556; 2818; 2825; 3024; 3065; 3277; 3898; 4169; 4303; 4559; 4616; 4637; 4640; 4948; 5045; 5050; 5329; 5453	119	58	129; 172; 184; 204; 245; 265; 393; 503; 519; 543; 633; 697; 762; 816; 890; 944; 996; 1011; 1053; 1065; 1076; 1081; 1139; 1183; 1193; 1252; 1260; 1267; 1309; 1319; 1328; 1384; 1391; 1445; 1504; 1519; 1561; 1582; 1628; 1697; 1708; 1761; 1764; 1823; 1885; 1892; 1903; 1966; 2228; 2302; 2369; 2380; 2428; 2497; 2508; 2556; 2818; 2825; 2869; 2890; 3017; 3024; 3065; 3086; 3270; 3277; 3898; 3964; 3967; 41…	199	86
Ahnak	66395	569007630	XP_006527317.1	neuroblast differentiation-associated protein AHNAK isoform X2 [Mus musculus]	790	[K].VDINAPDVDVRGPDWHLKMPK.[VM]	VDINAPDVDVRGPDWHLkMPK	[K18](Biotin)	657.833	4	1823	2	RGPDWHLkMPKVKMP	569007630	1	0	0	0	657.833				4				1	0	0	0	349657	0	0	0	1	0	129; 204; 245; 265; 503; 519; 633; 697; 816; 944; 996; 1053; 1065; 1183; 1267; 1309; 1319; 1328; 1384; 1391; 1445; 1504; 1519; 1561; 1612; 1628; 1708; 1761; 1764; 1885; 1892; 1903; 1966; 2228; 2239; 2302; 2369; 2380; 2497; 2508; 2556; 2818; 2825; 3024; 3065; 3277; 3898; 4169; 4303; 4559; 4616; 4637; 4640; 4948; 5045; 5050; 5329; 5453	119	58	129; 172; 184; 204; 245; 265; 393; 503; 519; 543; 633; 697; 762; 816; 890; 944; 996; 1011; 1053; 1065; 1076; 1081; 1139; 1183; 1193; 1252; 1260; 1267; 1309; 1319; 1328; 1384; 1391; 1445; 1504; 1519; 1561; 1582; 1628; 1697; 1708; 1761; 1764; 1823; 1885; 1892; 1903; 1966; 2228; 2302; 2369; 2380; 2428; 2497; 2508; 2556; 2818; 2825; 2869; 2890; 3017; 3024; 3065; 3086; 3270; 3277; 3898; 3964; 3967; 41…	199	86
Ahnak	66395	569007630	XP_006527317.1	neuroblast differentiation-associated protein AHNAK isoform X2 [Mus musculus]	790	[K].APKISMPDVDFNLKGPK.[I]	APkISMPDVDFNLKGPK	[K3](Biotin)	695.029	3	2228	2	DMHFKAPkISMPDVD	569007630	1	1	1	1	695.028	695.029	695.029	695.028	3	3	3	3	1	1	1	1	387784	283020	0	137003	2	2	129; 204; 245; 265; 503; 519; 633; 697; 816; 944; 996; 1053; 1065; 1183; 1267; 1309; 1319; 1328; 1384; 1391; 1445; 1504; 1519; 1561; 1612; 1628; 1708; 1761; 1764; 1885; 1892; 1903; 1966; 2228; 2239; 2302; 2369; 2380; 2497; 2508; 2556; 2818; 2825; 3024; 3065; 3277; 3898; 4169; 4303; 4559; 4616; 4637; 4640; 4948; 5045; 5050; 5329; 5453	119	58	129; 172; 184; 204; 245; 265; 393; 503; 519; 543; 633; 697; 762; 816; 890; 944; 996; 1011; 1053; 1065; 1076; 1081; 1139; 1183; 1193; 1252; 1260; 1267; 1309; 1319; 1328; 1384; 1391; 1445; 1504; 1519; 1561; 1582; 1628; 1697; 1708; 1761; 1764; 1823; 1885; 1892; 1903; 1966; 2228; 2302; 2369; 2380; 2428; 2497; 2508; 2556; 2818; 2825; 2869; 2890; 3017; 3024; 3065; 3086; 3270; 3277; 3898; 3964; 3967; 41…	199	86
Ahnak	66395	569007630	XP_006527317.1	neuroblast differentiation-associated protein AHNAK isoform X2 [Mus musculus]	790	[K].VDISAPDVDVHGPDWHLKMPK.[V]	VDISAPDVDVHGPDWHLkMPK	[K18](Biotin)	646.32	4	4362	1	HGPDWHLkMPKVKMP	569007630	1	1	0	0	646.32	646.319			4	4			1	1	0	0	196117	631447	0	0	2	0	129; 204; 245; 265; 503; 519; 633; 697; 816; 944; 996; 1053; 1065; 1183; 1267; 1309; 1319; 1328; 1384; 1391; 1445; 1504; 1519; 1561; 1612; 1628; 1708; 1761; 1764; 1885; 1892; 1903; 1966; 2228; 2239; 2302; 2369; 2380; 2497; 2508; 2556; 2818; 2825; 3024; 3065; 3277; 3898; 4169; 4303; 4559; 4616; 4637; 4640; 4948; 5045; 5050; 5329; 5453	119	58	129; 172; 184; 204; 245; 265; 393; 503; 519; 543; 633; 697; 762; 816; 890; 944; 996; 1011; 1053; 1065; 1076; 1081; 1139; 1183; 1193; 1252; 1260; 1267; 1309; 1319; 1328; 1384; 1391; 1445; 1504; 1519; 1561; 1582; 1628; 1697; 1708; 1761; 1764; 1823; 1885; 1892; 1903; 1966; 2228; 2302; 2369; 2380; 2428; 2497; 2508; 2556; 2818; 2825; 2869; 2890; 3017; 3024; 3065; 3086; 3270; 3277; 3898; 3964; 3967; 41…	199	86
Ahnak	66395	569007630	XP_006527317.1	neuroblast differentiation-associated protein AHNAK isoform X2 [Mus musculus]	790	[K].VDISAPDVDVQGPDWHLKMPK.[M]	VDISAPDVDVQGPDWHLkMPK	[K18](Biotin)	858.421	3	1252	1	QGPDWHLkMPKMKMP	569007630	1	0	0	0	858.421				3				1	0	0	0	69444.4	0	0	0	1	0	129; 204; 245; 265; 503; 519; 633; 697; 816; 944; 996; 1053; 1065; 1183; 1267; 1309; 1319; 1328; 1384; 1391; 1445; 1504; 1519; 1561; 1612; 1628; 1708; 1761; 1764; 1885; 1892; 1903; 1966; 2228; 2239; 2302; 2369; 2380; 2497; 2508; 2556; 2818; 2825; 3024; 3065; 3277; 3898; 4169; 4303; 4559; 4616; 4637; 4640; 4948; 5045; 5050; 5329; 5453	119	58	129; 172; 184; 204; 245; 265; 393; 503; 519; 543; 633; 697; 762; 816; 890; 944; 996; 1011; 1053; 1065; 1076; 1081; 1139; 1183; 1193; 1252; 1260; 1267; 1309; 1319; 1328; 1384; 1391; 1445; 1504; 1519; 1561; 1582; 1628; 1697; 1708; 1761; 1764; 1823; 1885; 1892; 1903; 1966; 2228; 2302; 2369; 2380; 2428; 2497; 2508; 2556; 2818; 2825; 2869; 2890; 3017; 3024; 3065; 3086; 3270; 3277; 3898; 3964; 3967; 41…	199	86
Ahnak	66395	569007630	XP_006527317.1	neuroblast differentiation-associated protein AHNAK isoform X2 [Mus musculus]	790	[K].LEGPHLSLKGPGVDLPSVDLSMPK.[V]	LEGPHLSLkGPGVDLPSVDLSMPK	[K9](Biotin)	904.811	3	4994	1	EGPHLSLkGPGVDLP	569007630	1	1	0	0	904.811	904.81			3	3			1	1	0	0	43258.8	71134.2	0	0	2	0	129; 204; 245; 265; 503; 519; 633; 697; 816; 944; 996; 1053; 1065; 1183; 1267; 1309; 1319; 1328; 1384; 1391; 1445; 1504; 1519; 1561; 1612; 1628; 1708; 1761; 1764; 1885; 1892; 1903; 1966; 2228; 2239; 2302; 2369; 2380; 2497; 2508; 2556; 2818; 2825; 3024; 3065; 3277; 3898; 4169; 4303; 4559; 4616; 4637; 4640; 4948; 5045; 5050; 5329; 5453	119	58	129; 172; 184; 204; 245; 265; 393; 503; 519; 543; 633; 697; 762; 816; 890; 944; 996; 1011; 1053; 1065; 1076; 1081; 1139; 1183; 1193; 1252; 1260; 1267; 1309; 1319; 1328; 1384; 1391; 1445; 1504; 1519; 1561; 1582; 1628; 1697; 1708; 1761; 1764; 1823; 1885; 1892; 1903; 1966; 2228; 2302; 2369; 2380; 2428; 2497; 2508; 2556; 2818; 2825; 2869; 2890; 3017; 3024; 3065; 3086; 3270; 3277; 3898; 3964; 3967; 41…	199	86
Ahnak	66395	569007630	XP_006527317.1	neuroblast differentiation-associated protein AHNAK isoform X2 [Mus musculus]	790	[K].ISMPDLNLNLKGPNVK.[G]	ISMPDLNLNLkGPNVK	[K11](Biotin)	660.355	3	2890	1	PDLNLNLkGPNVKGD	569007630	1	0	0	0	660.355				3				1	0	0	0	19199.7	0	0	0	1	0	129; 204; 245; 265; 503; 519; 633; 697; 816; 944; 996; 1053; 1065; 1183; 1267; 1309; 1319; 1328; 1384; 1391; 1445; 1504; 1519; 1561; 1612; 1628; 1708; 1761; 1764; 1885; 1892; 1903; 1966; 2228; 2239; 2302; 2369; 2380; 2497; 2508; 2556; 2818; 2825; 3024; 3065; 3277; 3898; 4169; 4303; 4559; 4616; 4637; 4640; 4948; 5045; 5050; 5329; 5453	119	58	129; 172; 184; 204; 245; 265; 393; 503; 519; 543; 633; 697; 762; 816; 890; 944; 996; 1011; 1053; 1065; 1076; 1081; 1139; 1183; 1193; 1252; 1260; 1267; 1309; 1319; 1328; 1384; 1391; 1445; 1504; 1519; 1561; 1582; 1628; 1697; 1708; 1761; 1764; 1823; 1885; 1892; 1903; 1966; 2228; 2302; 2369; 2380; 2428; 2497; 2508; 2556; 2818; 2825; 2869; 2890; 3017; 3024; 3065; 3086; 3270; 3277; 3898; 3964; 3967; 41…	199	86
Ahnak	66395	569007630	XP_006527317.1	neuroblast differentiation-associated protein AHNAK isoform X2 [Mus musculus]	790	[K].FGMPGFKAESPEMEVNLPK.[S]	FGMPGFkAESPEMEVNLPK	[K7](Biotin)	778.704	3	890	1	KFGMPGFkAESPEME	569007630	1	1	0	0	778.704	778.704			3	3			1	1	0	0	0	88851.1	0	0	2	0	129; 204; 245; 265; 503; 519; 633; 697; 816; 944; 996; 1053; 1065; 1183; 1267; 1309; 1319; 1328; 1384; 1391; 1445; 1504; 1519; 1561; 1612; 1628; 1708; 1761; 1764; 1885; 1892; 1903; 1966; 2228; 2239; 2302; 2369; 2380; 2497; 2508; 2556; 2818; 2825; 3024; 3065; 3277; 3898; 4169; 4303; 4559; 4616; 4637; 4640; 4948; 5045; 5050; 5329; 5453	119	58	129; 172; 184; 204; 245; 265; 393; 503; 519; 543; 633; 697; 762; 816; 890; 944; 996; 1011; 1053; 1065; 1076; 1081; 1139; 1183; 1193; 1252; 1260; 1267; 1309; 1319; 1328; 1384; 1391; 1445; 1504; 1519; 1561; 1582; 1628; 1697; 1708; 1761; 1764; 1823; 1885; 1892; 1903; 1966; 2228; 2302; 2369; 2380; 2428; 2497; 2508; 2556; 2818; 2825; 2869; 2890; 3017; 3024; 3065; 3086; 3270; 3277; 3898; 3964; 3967; 41…	199	86
Ahnak	66395	569007630	XP_006527317.1	neuroblast differentiation-associated protein AHNAK isoform X2 [Mus musculus]	790	[K].TPQISMSDIDLNVKGPK.[I]	TPQISMSDIDLNVkGPK	[K14](Biotin)	690.352	3	4240	1	SDIDLNVkGPKIKGD	569007630	0	1	0	0		690.352				3			0	1	0	0	0	116258	0	0	1	0	129; 204; 245; 265; 503; 519; 633; 697; 816; 944; 996; 1053; 1065; 1183; 1267; 1309; 1319; 1328; 1384; 1391; 1445; 1504; 1519; 1561; 1612; 1628; 1708; 1761; 1764; 1885; 1892; 1903; 1966; 2228; 2239; 2302; 2369; 2380; 2497; 2508; 2556; 2818; 2825; 3024; 3065; 3277; 3898; 4169; 4303; 4559; 4616; 4637; 4640; 4948; 5045; 5050; 5329; 5453	119	58	129; 172; 184; 204; 245; 265; 393; 503; 519; 543; 633; 697; 762; 816; 890; 944; 996; 1011; 1053; 1065; 1076; 1081; 1139; 1183; 1193; 1252; 1260; 1267; 1309; 1319; 1328; 1384; 1391; 1445; 1504; 1519; 1561; 1582; 1628; 1697; 1708; 1761; 1764; 1823; 1885; 1892; 1903; 1966; 2228; 2302; 2369; 2380; 2428; 2497; 2508; 2556; 2818; 2825; 2869; 2890; 3017; 3024; 3065; 3086; 3270; 3277; 3898; 3964; 3967; 41…	199	86
Ahnak	66395	569007630	XP_006527317.1	neuroblast differentiation-associated protein AHNAK isoform X2 [Mus musculus]	790	[K].FKMPSMNIQTHKISMPDVGLNLKGPK.[L]	FKMPSMNIQTHkISMPDVGLNLKGPK	[K12](Biotin)	628.331	5	1697	3	SMNIQTHkISMPDVG	569007630	0	1	0	0		628.331				5			0	1	0	0	0	77782.7	0	0	1	0	129; 204; 245; 265; 503; 519; 633; 697; 816; 944; 996; 1053; 1065; 1183; 1267; 1309; 1319; 1328; 1384; 1391; 1445; 1504; 1519; 1561; 1612; 1628; 1708; 1761; 1764; 1885; 1892; 1903; 1966; 2228; 2239; 2302; 2369; 2380; 2497; 2508; 2556; 2818; 2825; 3024; 3065; 3277; 3898; 4169; 4303; 4559; 4616; 4637; 4640; 4948; 5045; 5050; 5329; 5453	119	58	129; 172; 184; 204; 245; 265; 393; 503; 519; 543; 633; 697; 762; 816; 890; 944; 996; 1011; 1053; 1065; 1076; 1081; 1139; 1183; 1193; 1252; 1260; 1267; 1309; 1319; 1328; 1384; 1391; 1445; 1504; 1519; 1561; 1582; 1628; 1697; 1708; 1761; 1764; 1823; 1885; 1892; 1903; 1966; 2228; 2302; 2369; 2380; 2428; 2497; 2508; 2556; 2818; 2825; 2869; 2890; 3017; 3024; 3065; 3086; 3270; 3277; 3898; 3964; 3967; 41…	199	86
Ahnak	66395	569007630	XP_006527317.1	neuroblast differentiation-associated protein AHNAK isoform X2 [Mus musculus]	790	[K].FKVPDVQFK.[T]	FkVPDVQFK	[K2](Biotin)	667.352	2	4219	1	KLKGPKFkVPDVQFK	569007630	1	0	0	0	667.352				2				1	0	0	0	63745.6	0	0	0	1	0	129; 204; 245; 265; 503; 519; 633; 697; 816; 944; 996; 1053; 1065; 1183; 1267; 1309; 1319; 1328; 1384; 1391; 1445; 1504; 1519; 1561; 1612; 1628; 1708; 1761; 1764; 1885; 1892; 1903; 1966; 2228; 2239; 2302; 2369; 2380; 2497; 2508; 2556; 2818; 2825; 3024; 3065; 3277; 3898; 4169; 4303; 4559; 4616; 4637; 4640; 4948; 5045; 5050; 5329; 5453	119	58	129; 172; 184; 204; 245; 265; 393; 503; 519; 543; 633; 697; 762; 816; 890; 944; 996; 1011; 1053; 1065; 1076; 1081; 1139; 1183; 1193; 1252; 1260; 1267; 1309; 1319; 1328; 1384; 1391; 1445; 1504; 1519; 1561; 1582; 1628; 1697; 1708; 1761; 1764; 1823; 1885; 1892; 1903; 1966; 2228; 2302; 2369; 2380; 2428; 2497; 2508; 2556; 2818; 2825; 2869; 2890; 3017; 3024; 3065; 3086; 3270; 3277; 3898; 3964; 3967; 41…	199	86
Ahnak	66395	569007630	XP_006527317.1	neuroblast differentiation-associated protein AHNAK isoform X2 [Mus musculus]	790	[K].FKVPDVQFKTPQISMSDIDLNVKGPK.[I]	FKVPDVQFKTPQISMSDIDLNVKGPK	[K](Biotin)			X	3
Ahnak	66395	569007630	XP_006527317.1	neuroblast differentiation-associated protein AHNAK isoform X2 [Mus musculus]	790	[K].GPSFNVASPESDFGVSLKGPK.[V]	GPSFNVASPESDFGVSLkGPK	[K18](Biotin)	782.719	3	5268	1	SDFGVSLkGPKVKGG	569007630	1	0	0	0	782.719				3				1	0	0	0	269686	0	0	0	1	0	129; 204; 245; 265; 503; 519; 633; 697; 816; 944; 996; 1053; 1065; 1183; 1267; 1309; 1319; 1328; 1384; 1391; 1445; 1504; 1519; 1561; 1612; 1628; 1708; 1761; 1764; 1885; 1892; 1903; 1966; 2228; 2239; 2302; 2369; 2380; 2497; 2508; 2556; 2818; 2825; 3024; 3065; 3277; 3898; 4169; 4303; 4559; 4616; 4637; 4640; 4948; 5045; 5050; 5329; 5453	119	58	129; 172; 184; 204; 245; 265; 393; 503; 519; 543; 633; 697; 762; 816; 890; 944; 996; 1011; 1053; 1065; 1076; 1081; 1139; 1183; 1193; 1252; 1260; 1267; 1309; 1319; 1328; 1384; 1391; 1445; 1504; 1519; 1561; 1582; 1628; 1697; 1708; 1761; 1764; 1823; 1885; 1892; 1903; 1966; 2228; 2302; 2369; 2380; 2428; 2497; 2508; 2556; 2818; 2825; 2869; 2890; 3017; 3024; 3065; 3086; 3270; 3277; 3898; 3964; 3967; 41…	199	86
Ahnak	66395	569007630	XP_006527317.1	neuroblast differentiation-associated protein AHNAK isoform X2 [Mus musculus]	790	[K].APKISMPDIDLNLK.[G]	APkISMPDIDLNLK	[K3](Biotin)	890.969	2	2497	1	EMNIKAPkISMPDID	569007630	0	1	0	0		890.969				2			0	1	0	0	0	87015.7	0	0	1	0	129; 204; 245; 265; 503; 519; 633; 697; 816; 944; 996; 1053; 1065; 1183; 1267; 1309; 1319; 1328; 1384; 1391; 1445; 1504; 1519; 1561; 1612; 1628; 1708; 1761; 1764; 1885; 1892; 1903; 1966; 2228; 2239; 2302; 2369; 2380; 2497; 2508; 2556; 2818; 2825; 3024; 3065; 3277; 3898; 4169; 4303; 4559; 4616; 4637; 4640; 4948; 5045; 5050; 5329; 5453	119	58	129; 172; 184; 204; 245; 265; 393; 503; 519; 543; 633; 697; 762; 816; 890; 944; 996; 1011; 1053; 1065; 1076; 1081; 1139; 1183; 1193; 1252; 1260; 1267; 1309; 1319; 1328; 1384; 1391; 1445; 1504; 1519; 1561; 1582; 1628; 1697; 1708; 1761; 1764; 1823; 1885; 1892; 1903; 1966; 2228; 2302; 2369; 2380; 2428; 2497; 2508; 2556; 2818; 2825; 2869; 2890; 3017; 3024; 3065; 3086; 3270; 3277; 3898; 3964; 3967; 41…	199	86
Ahnak	66395	569007630	XP_006527317.1	neuroblast differentiation-associated protein AHNAK isoform X2 [Mus musculus]	790	[K].APKISMPEIDLNLKGPK.[L]	APkISMPEIDLNLKGPK	[K3](Biotin)	693.044	3	3967	2	DLHLKAPkISMPEID	569007630	1	0	0	0	693.044				3				1	0	0	0	132351	0	0	0	1	0	129; 204; 245; 265; 503; 519; 633; 697; 816; 944; 996; 1053; 1065; 1183; 1267; 1309; 1319; 1328; 1384; 1391; 1445; 1504; 1519; 1561; 1612; 1628; 1708; 1761; 1764; 1885; 1892; 1903; 1966; 2228; 2239; 2302; 2369; 2380; 2497; 2508; 2556; 2818; 2825; 3024; 3065; 3277; 3898; 4169; 4303; 4559; 4616; 4637; 4640; 4948; 5045; 5050; 5329; 5453	119	58	129; 172; 184; 204; 245; 265; 393; 503; 519; 543; 633; 697; 762; 816; 890; 944; 996; 1011; 1053; 1065; 1076; 1081; 1139; 1183; 1193; 1252; 1260; 1267; 1309; 1319; 1328; 1384; 1391; 1445; 1504; 1519; 1561; 1582; 1628; 1697; 1708; 1761; 1764; 1823; 1885; 1892; 1903; 1966; 2228; 2302; 2369; 2380; 2428; 2497; 2508; 2556; 2818; 2825; 2869; 2890; 3017; 3024; 3065; 3086; 3270; 3277; 3898; 3964; 3967; 41…	199	86
Ahnak	66395	569007630	XP_006527317.1	neuroblast differentiation-associated protein AHNAK isoform X2 [Mus musculus]	790	[K].APKISMPEVDLNLK.[G]	APkISMPEVDLNLK	[K3](Biotin)	890.969	2	4303	1	DLHLKAPkISMPEVD	569007630	0	1	0	0		890.969				2			0	1	0	0	0	87015.7	0	0	1	0	129; 204; 245; 265; 503; 519; 633; 697; 816; 944; 996; 1053; 1065; 1183; 1267; 1309; 1319; 1328; 1384; 1391; 1445; 1504; 1519; 1561; 1612; 1628; 1708; 1761; 1764; 1885; 1892; 1903; 1966; 2228; 2239; 2302; 2369; 2380; 2497; 2508; 2556; 2818; 2825; 3024; 3065; 3277; 3898; 4169; 4303; 4559; 4616; 4637; 4640; 4948; 5045; 5050; 5329; 5453	119	58	129; 172; 184; 204; 245; 265; 393; 503; 519; 543; 633; 697; 762; 816; 890; 944; 996; 1011; 1053; 1065; 1076; 1081; 1139; 1183; 1193; 1252; 1260; 1267; 1309; 1319; 1328; 1384; 1391; 1445; 1504; 1519; 1561; 1582; 1628; 1697; 1708; 1761; 1764; 1823; 1885; 1892; 1903; 1966; 2228; 2302; 2369; 2380; 2428; 2497; 2508; 2556; 2818; 2825; 2869; 2890; 3017; 3024; 3065; 3086; 3270; 3277; 3898; 3964; 3967; 41…	199	86
Ahnak	66395	569007630	XP_006527317.1	neuroblast differentiation-associated protein AHNAK isoform X2 [Mus musculus]	790	[K].VDINAPDVDVQGPDWHLKMPK.[M]	VDINAPDVDVQGPDWHLkMPK	[K18](Biotin)	867.424	3	2428	1	QGPDWHLkMPKMKMP	569007630	0	1	0	0		867.424				3			0	1	0	0	0	0	0	0	1	0	129; 204; 245; 265; 503; 519; 633; 697; 816; 944; 996; 1053; 1065; 1183; 1267; 1309; 1319; 1328; 1384; 1391; 1445; 1504; 1519; 1561; 1612; 1628; 1708; 1761; 1764; 1885; 1892; 1903; 1966; 2228; 2239; 2302; 2369; 2380; 2497; 2508; 2556; 2818; 2825; 3024; 3065; 3277; 3898; 4169; 4303; 4559; 4616; 4637; 4640; 4948; 5045; 5050; 5329; 5453	119	58	129; 172; 184; 204; 245; 265; 393; 503; 519; 543; 633; 697; 762; 816; 890; 944; 996; 1011; 1053; 1065; 1076; 1081; 1139; 1183; 1193; 1252; 1260; 1267; 1309; 1319; 1328; 1384; 1391; 1445; 1504; 1519; 1561; 1582; 1628; 1697; 1708; 1761; 1764; 1823; 1885; 1892; 1903; 1966; 2228; 2302; 2369; 2380; 2428; 2497; 2508; 2556; 2818; 2825; 2869; 2890; 3017; 3024; 3065; 3086; 3270; 3277; 3898; 3964; 3967; 41…	199	86
Ahnak	66395	569007630	XP_006527317.1	neuroblast differentiation-associated protein AHNAK isoform X2 [Mus musculus]	790	[K].SSKASLGSLEGEVEAEASSPK.[G]	SSkASLGSLEGEVEAEASSPK	[K3](Biotin)	763.702	3	5453	1	KGDLKSSkASLGSLE	569007630	0	0	1	0			763.702				3		0	0	1	0	0	0	39833.1	0	0	1	129; 204; 245; 265; 503; 519; 633; 697; 816; 944; 996; 1053; 1065; 1183; 1267; 1309; 1319; 1328; 1384; 1391; 1445; 1504; 1519; 1561; 1612; 1628; 1708; 1761; 1764; 1885; 1892; 1903; 1966; 2228; 2239; 2302; 2369; 2380; 2497; 2508; 2556; 2818; 2825; 3024; 3065; 3277; 3898; 4169; 4303; 4559; 4616; 4637; 4640; 4948; 5045; 5050; 5329; 5453	119	58	129; 172; 184; 204; 245; 265; 393; 503; 519; 543; 633; 697; 762; 816; 890; 944; 996; 1011; 1053; 1065; 1076; 1081; 1139; 1183; 1193; 1252; 1260; 1267; 1309; 1319; 1328; 1384; 1391; 1445; 1504; 1519; 1561; 1582; 1628; 1697; 1708; 1761; 1764; 1823; 1885; 1892; 1903; 1966; 2228; 2302; 2369; 2380; 2428; 2497; 2508; 2556; 2818; 2825; 2869; 2890; 3017; 3024; 3065; 3086; 3270; 3277; 3898; 3964; 3967; 41…	199	86
Ahnak	66395	569007630	XP_006527317.1	neuroblast differentiation-associated protein AHNAK isoform X2 [Mus musculus]	790	[K].ISMPDVDFNLKGPK.[I]	ISMPDVDFNLkGPK	[K11](Biotin)	893.949	2	2239	1	PDVDFNLkGPKIKGD	569007630	0	0	1	0			893.949				2		0	0	1	0	0	0	43773.3	0	0	1	129; 204; 245; 265; 503; 519; 633; 697; 816; 944; 996; 1053; 1065; 1183; 1267; 1309; 1319; 1328; 1384; 1391; 1445; 1504; 1519; 1561; 1612; 1628; 1708; 1761; 1764; 1885; 1892; 1903; 1966; 2228; 2239; 2302; 2369; 2380; 2497; 2508; 2556; 2818; 2825; 3024; 3065; 3277; 3898; 4169; 4303; 4559; 4616; 4637; 4640; 4948; 5045; 5050; 5329; 5453	119	58	129; 172; 184; 204; 245; 265; 393; 503; 519; 543; 633; 697; 762; 816; 890; 944; 996; 1011; 1053; 1065; 1076; 1081; 1139; 1183; 1193; 1252; 1260; 1267; 1309; 1319; 1328; 1384; 1391; 1445; 1504; 1519; 1561; 1582; 1628; 1697; 1708; 1761; 1764; 1823; 1885; 1892; 1903; 1966; 2228; 2302; 2369; 2380; 2428; 2497; 2508; 2556; 2818; 2825; 2869; 2890; 3017; 3024; 3065; 3086; 3270; 3277; 3898; 3964; 3967; 41…	199	86
Actb	11461	6671509	NP_031419.1	actin, cytoplasmic 1 [Mus musculus]	19	[K].IKIIAPPERK.[Y]	IkIIAPPERK	[K2](Biotin)	464.279	3	328	2	APSTMKIkIIAPPER	6671509	1	1	0	0	464.279	464.279			3	3			1	1	0	0	276580	206405	0	0	2	0				328	2	1
Lmna	16905	568921945	XP_006501136.1	prelamin-A/C isoform X1 [Mus musculus]	39	[R].LVEIDNGKQR.[E]	LVEIDNGkQR	[K8](Biotin)	699.365	2	233	1	LVEIDNGkQREFESR	568921945	1	0	1	1	699.364		699.365	699.364	2		2	2	1	0	1	1	365770	0	781036	810539	1	2	233; 420; 450	7	3	233; 420; 450	4	3
Lmna	16905	568921945	XP_006501136.1	prelamin-A/C isoform X1 [Mus musculus]	39	[R].KLESSESR.[S]	kLESSESR	[K1](Biotin)	581.283	2	420	1	GSVTKKRkLESSESR	568921945	1	0	1	1	581.283		581.283	581.283	2		2	2	1	0	1	1	1.02343e+06	0	2.14519e+06	1.72475e+06	1	2	233; 420; 450	7	3	233; 420; 450	4	3
Lmna	16905	568921945	XP_006501136.1	prelamin-A/C isoform X1 [Mus musculus]	39	[R].LVEIDNGKQREFESR.[L]	LVEIDNGkQREFESR	[K8](Biotin)	682.675	3	233	2	LVEIDNGkQREFESR	568921945	0	0	1	0			682.675				3		0	0	1	0	0	0	680976	0	0	1	233; 420; 450	7	3	233; 420; 450	4	3
Lmna	16905	568921945	XP_006501136.1	prelamin-A/C isoform X1 [Mus musculus]	39	[R].VAVEEVDEEGKFVR.[L]	VAVEEVDEEGkFVR	[K11](Biotin)	611.304	3	450	1	EEVDEEGkFVRLRNK	568921945	1	1	1	1	611.302	611.304	611.302	611.302	3	3	3	3	1	1	1	1	268140	150623	260958	133237	2	2	233; 420; 450	7	3	233; 420; 450	4	3
Lmna	16905	568921945	XP_006501136.1	prelamin-A/C isoform X1 [Mus musculus]	39	[R].LQTLKEELDFQKNIYSEELR.[E]	LQTLKEELDFQKNIYSEELR	[K](Biotin)			X	2
Lmna	16905	568921945	XP_006501136.1	prelamin-A/C isoform X1 [Mus musculus]	39	[R].ASSHSSQSQGGGSVTKK.[R]	ASSHSSQSQGGGSVTKK	[K](Biotin)			X	1
BirA_mCh_m6a	215	215	215		57	[K].HPADIPDYLKLSFPEGFKWER.[V]	HPADIPDYLkLSFPEGFKWER	[K10](Biotin)	693.598	4	462	2	ADIPDYLkLSFPEGF	215	0	0	0	1				693.598				4	0	0	0	1	0	0	0	243525	0	1	4; 183; 194; 278; 288; 294; 318; 387; 393; 452; 462; 470; 499; 517; 540; 546; 556; 563; 609; 615; 631; 634; 637; 644; 681; 686; 704; 710	373	28	4; 194; 288; 294; 452; 470; 609; 615; 631; 634; 637; 644; 681; 686; 704; 710	217	16
BirA_mCh_m6a	215	215	215		57	[K].QGALLLEQDGIIKPWMGGEISLR.[S]	QGALLLEQDGIIkPWMGGEISLR	[K13](Biotin)	917.487	3	318	0	LEQDGIIkPWMGGEI	215	0	0	0	1				917.487				3	0	0	0	2	0	0	0	677305	0	2	4; 183; 194; 278; 288; 294; 318; 387; 393; 452; 462; 470; 499; 517; 540; 546; 556; 563; 609; 615; 631; 634; 637; 644; 681; 686; 704; 710	373	28	4; 194; 288; 294; 452; 470; 609; 615; 631; 634; 637; 644; 681; 686; 704; 710	217	16
BirA_mCh_m6a	215	215	215		57	[R].VMNFEDGGVVTVTQDSSLQDGEFIYKVK.[L]	VMNFEDGGVVTVTQDSSLQDGEFIYkVK	[K26](Biotin)	1111.2	3	499	1	QDGEFIYkVKLRGTN	215	0	0	0	1				1111.2				3	0	0	0	1	0	0	0	114525	0	1	4; 183; 194; 278; 288; 294; 318; 387; 393; 452; 462; 470; 499; 517; 540; 546; 556; 563; 609; 615; 631; 634; 637; 644; 681; 686; 704; 710	373	28	4; 194; 288; 294; 452; 470; 609; 615; 631; 634; 637; 644; 681; 686; 704; 710	217	16
BirA_mCh_m6a	215	215	215		57	[K].LKDGGHYDAEVKTTYK.[A]	LKDGGHYDAEVkTTYK	[K12](Biotin)	513.503	4	556	2	GHYDAEVkTTYKAKK	215	0	0	1	1			513.503	513.502			4	4	0	0	1	1	0	0	240281	238289	0	2	4; 183; 194; 278; 288; 294; 318; 387; 393; 452; 462; 470; 499; 517; 540; 546; 556; 563; 609; 615; 631; 634; 637; 644; 681; 686; 704; 710	373	28	4; 194; 288; 294; 452; 470; 609; 615; 631; 634; 637; 644; 681; 686; 704; 710	217	16
BirA_mCh_m6a	215	215	215		57	[R].WEKLDNFINRPVK.[L]	WEkLDNFINRPVK	[K3](Biotin)	628.998	3	278	1	PYLSRWEkLDNFINR	215	0	0	1	0			628.998				3		0	0	1	0	0	0	36283.2	0	0	1	4; 183; 194; 278; 288; 294; 318; 387; 393; 452; 462; 470; 499; 517; 540; 546; 556; 563; 609; 615; 631; 634; 637; 644; 681; 686; 704; 710	373	28	4; 194; 288; 294; 452; 470; 609; 615; 631; 634; 637; 644; 681; 686; 704; 710	217	16
BirA_mCh_m6a	215	215	215		57	[K].DGGHYDAEVKTTYK.[A]	DGGHYDAEVkTTYK	[K10](Biotin)	603.943	3	556	1	GHYDAEVkTTYKAKK	215	0	0	1	1			603.943	603.943			3	3	0	0	1	1	0	0	367647	245890	0	2	4; 183; 194; 278; 288; 294; 318; 387; 393; 452; 462; 470; 499; 517; 540; 546; 556; 563; 609; 615; 631; 634; 637; 644; 681; 686; 704; 710	373	28	4; 194; 288; 294; 452; 470; 609; 615; 631; 634; 637; 644; 681; 686; 704; 710	217	16
BirA_mCh_m6a	215	215	215		57	[R].MYPEDGALKGEIKQR.[L]	MYPEDGALKGEIkQR	[K13](Biotin)	654.328	3	540	2	GALKGEIkQRLKLKD	215	0	0	1	1			654.328	654.326			3	3	0	0	1	1	0	0	133024	0	0	2	4; 183; 194; 278; 288; 294; 318; 387; 393; 452; 462; 470; 499; 517; 540; 546; 556; 563; 609; 615; 631; 634; 637; 644; 681; 686; 704; 710	373	28	4; 194; 288; 294; 452; 470; 609; 615; 631; 634; 637; 644; 681; 686; 704; 710	217	16
BirA_mCh_m6a	215	215	215		57	[K].KTMGWEASSER.[M]	kTMGWEASSER	[K1](Biotin)	754.337	2	517	1	DGPVMQKkTMGWEAS	215	0	0	1	0			754.337				2		0	0	1	0	0	0	469411	0	0	1	4; 183; 194; 278; 288; 294; 318; 387; 393; 452; 462; 470; 499; 517; 540; 546; 556; 563; 609; 615; 631; 634; 637; 644; 681; 686; 704; 710	373	28	4; 194; 288; 294; 452; 470; 609; 615; 631; 634; 637; 644; 681; 686; 704; 710	217	16
BirA_mCh_m6a	215	215	215		57	[K].LDNFINRPVKLIIGDKEIFGISR.[G]	LDNFINRPVkLIIGDKEIFGISR	[K10](Biotin)	721.655	4	288	2	NFINRPVkLIIGDKE	215	0	0	0	1				721.655				4	0	0	0	3	0	0	0	6.18921e+06	0	3	4; 183; 194; 278; 288; 294; 318; 387; 393; 452; 462; 470; 499; 517; 540; 546; 556; 563; 609; 615; 631; 634; 637; 644; 681; 686; 704; 710	373	28	4; 194; 288; 294; 452; 470; 609; 615; 631; 634; 637; 644; 681; 686; 704; 710	217	16
BirA_mCh_m6a	215	215	215		57	[R].GIDKQGALLLEQDGIIKPWMGGEISLR.[S]	GIDKQGALLLEQDGIIKPWMGGEISLR	[K](Biotin)			X	1
BirA_mCh_m6a	215	215	215		57	[-].MEQKLISEEDLDKDNTVPLK.[L]	MEQkLISEEDLDKDNTVPLK	[K4](Biotin)	871.766	3	4	2	MEQkLISEEDL	215	1	1	1	1	871.765	871.766	871.766	871.765	3	3	3	3	3	4	6	5	1.12482e+07	8.11201e+06	9.06004e+07	6.62161e+07	7	11	4; 183; 194; 278; 288; 294; 318; 387; 393; 452; 462; 470; 499; 517; 540; 546; 556; 563; 609; 615; 631; 634; 637; 644; 681; 686; 704; 710	373	28	4; 194; 288; 294; 452; 470; 609; 615; 631; 634; 637; 644; 681; 686; 704; 710	217	16
BirA_mCh_m6a	215	215	215		57	[K].VTKEFK.[Q]	VTkEFK	[K3](Biotin)	489.26	2	634	1	RDPEKVTkEFKQGLF	215	1	0	1	1	489.26		489.26	489.26	2		2	2	1	0	1	1	1.37279e+06	0	6.16152e+06	4.8677e+06	1	2	4; 183; 194; 278; 288; 294; 318; 387; 393; 452; 462; 470; 499; 517; 540; 546; 556; 563; 609; 615; 631; 634; 637; 644; 681; 686; 704; 710	373	28	4; 194; 288; 294; 452; 470; 609; 615; 631; 634; 637; 644; 681; 686; 704; 710	217	16
BirA_mCh_m6a	215	215	215		57	[R].DPEKVTKEFK.[Q]	DPEKVTkEFK	[K7](Biotin)	482.915	3	634	2	RDPEKVTkEFKQGLF	215	1	1	1	1	482.915	482.915	482.915	482.915	3	3	3	3	1	1	2	2	0	0	9.47125e+06	7.81234e+06	2	4	4; 183; 194; 278; 288; 294; 318; 387; 393; 452; 462; 470; 499; 517; 540; 546; 556; 563; 609; 615; 631; 634; 637; 644; 681; 686; 704; 710	373	28	4; 194; 288; 294; 452; 470; 609; 615; 631; 634; 637; 644; 681; 686; 704; 710	217	16
BirA_mCh_m6a	215	215	215		57	[R].HSTGGMDELYKSQVPSKGR.[I]	HSTGGMDELYkSQVPSkGR	[K11; K17](Biotin)	849.061	3	609; 615	2	GGMDELYkSQVPSKG; YKSQVPSkGRIFLVQ	215	2	2	2	2	843.73	843.729	849.061	843.73	3	3	3	3	6	9	20	9	2.62593e+08	2.91383e+08	1168038132	1.20415e+09	15	29	4; 183; 194; 278; 288; 294; 318; 387; 393; 452; 462; 470; 499; 517; 540; 546; 556; 563; 609; 615; 631; 634; 637; 644; 681; 686; 704; 710	373	28	4; 194; 288; 294; 452; 470; 609; 615; 631; 634; 637; 644; 681; 686; 704; 710	217	16
BirA_mCh_m6a	215	215	215		57	[R].DPEKVTK.[E]	DPEkVTK	[K4](Biotin)	521.765	2	631	1	GQVRDPEkVTKEFKQ	215	0	0	1	0			521.765				2		0	0	1	0	0	0	5855556	0	0	1	4; 183; 194; 278; 288; 294; 318; 387; 393; 452; 462; 470; 499; 517; 540; 546; 556; 563; 609; 615; 631; 634; 637; 644; 681; 686; 704; 710	373	28	4; 194; 288; 294; 452; 470; 609; 615; 631; 634; 637; 644; 681; 686; 704; 710	217	16
BirA_mCh_m6a	215	215	215		57	[K].LSFPEGFKWER.[V]	LSFPEGFkWER	[K8](Biotin)	811.397	3	470	1	LSFPEGFkWERVMNF	215	1	1	1	1	811.396	541.265	811.397	541.267	2	3	2	3	1	2	2	3	0	168696	733972	666952	3	5	4; 183; 194; 278; 288; 294; 318; 387; 393; 452; 462; 470; 499; 517; 540; 546; 556; 563; 609; 615; 631; 634; 637; 644; 681; 686; 704; 710	373	28	4; 194; 288; 294; 452; 470; 609; 615; 631; 634; 637; 644; 681; 686; 704; 710	217	16
BirA_mCh_m6a	215	215	215		57	[R].DPEKVTKEFKQGLFLR.[K]	DPEKVTkEFkQGLFLR	[K7; K10](Biotin)	796.415	3	634; 637	3	RDPEKVTkEFKQGLF; EKVTKEFkQGLFLRK	215	2	2	2	2	796.413	796.415	796.414	796.413	3	3	3	3	1	1	2	1	147737	90808.1	437390	892860	2	3	4; 183; 194; 278; 288; 294; 318; 387; 393; 452; 462; 470; 499; 517; 540; 546; 556; 563; 609; 615; 631; 634; 637; 644; 681; 686; 704; 710	373	28	4; 194; 288; 294; 452; 470; 609; 615; 631; 634; 637; 644; 681; 686; 704; 710	217	16
BirA_mCh_m6a	215	215	215		57	[K].VTKEFKQGLFLR.[K]	VTkEFkQGLFLR	[K3; K6](Biotin)	640.008	3	634; 637	2	RDPEKVTkEFKQGLF; EKVTKEFkQGLFLRK	215	2	2	2	2	640.008	640.008	640.007	640.008	3	3	3	3	1	1	2	2	104021	72499.1	197458	472671	2	4	4; 183; 194; 278; 288; 294; 318; 387; 393; 452; 462; 470; 499; 517; 540; 546; 556; 563; 609; 615; 631; 634; 637; 644; 681; 686; 704; 710	373	28	4; 194; 288; 294; 452; 470; 609; 615; 631; 634; 637; 644; 681; 686; 704; 710	217	16
BirA_mCh_m6a	215	215	215		57	[R].IFLVQDGQVRDPEKVTKEFK.[Q]	IFLVQDGQVRDPEkVTkEFK	[K14; K17](Biotin)	707.868	4	631; 634	3	GQVRDPEkVTKEFKQ; RDPEKVTkEFKQGLF	215	2	0	2	2	707.868		707.868	707.868	4		4	4	1	0	2	2	108361	0	1.24479e+06	2.70449e+06	1	4	4; 183; 194; 278; 288; 294; 318; 387; 393; 452; 462; 470; 499; 517; 540; 546; 556; 563; 609; 615; 631; 634; 637; 644; 681; 686; 704; 710	373	28	4; 194; 288; 294; 452; 470; 609; 615; 631; 634; 637; 644; 681; 686; 704; 710	217	16
BirA_mCh_m6a	215	215	215		57	[K].VTKEFKQGLFLR.[K]	VTKEFkQGLFLR	[K6](Biotin)	564.649	3	637	2	EKVTKEFkQGLFLRK	215	1	1	1	1	564.648	564.649	564.648	564.648	3	3	3	3	1	1	1	1	1.25693e+06	1.6352e+06	5327313	4343305	2	2	4; 183; 194; 278; 288; 294; 318; 387; 393; 452; 462; 470; 499; 517; 540; 546; 556; 563; 609; 615; 631; 634; 637; 644; 681; 686; 704; 710	373	28	4; 194; 288; 294; 452; 470; 609; 615; 631; 634; 637; 644; 681; 686; 704; 710	217	16
BirA_mCh_m6a	215	215	215		57	[R].HSTGGMDELYKSQVPSK.[G]	HSTGGMDELYkSQVPSK	[K11](Biotin)	702.662	3	609	1	GGMDELYkSQVPSKG	215	1	1	1	1	702.662	702.66	697.327	702.659	3	3	3	3	16	14	19	15	2.20275e+08	1.57765e+08	6.22025e+08	5.64356e+07	30	34	4; 183; 194; 278; 288; 294; 318; 387; 393; 452; 462; 470; 499; 517; 540; 546; 556; 563; 609; 615; 631; 634; 637; 644; 681; 686; 704; 710	373	28	4; 194; 288; 294; 452; 470; 609; 615; 631; 634; 637; 644; 681; 686; 704; 710	217	16
BirA_mCh_m6a	215	215	215		57	[R].IFLVQDGQVRDPEKVTK.[E]	IFLVQDGQVRDPEkVTK	[K14](Biotin)	733.394	3	631	2	GQVRDPEkVTKEFKQ	215	1	1	1	1	733.394	733.394	733.393	733.393	3	3	3	3	3	4	5	5	1.07959e+08	7.42841e+07	3.26591e+08	2.69449e+08	7	10	4; 183; 194; 278; 288; 294; 318; 387; 393; 452; 462; 470; 499; 517; 540; 546; 556; 563; 609; 615; 631; 634; 637; 644; 681; 686; 704; 710	373	28	4; 194; 288; 294; 452; 470; 609; 615; 631; 634; 637; 644; 681; 686; 704; 710	217	16
BirA_mCh_m6a	215	215	215		57	[K].EFKQGLFLRK.[S]	EFkQGLFLRK	[K3](Biotin)	746.412	3	637	2	EKVTKEFkQGLFLRK	215	1	1	1	1	497.943	746.412	746.411	497.943	3	2	2	3	2	2	4	2	66352379	4.04721e+07	372403946	139013826	4	6	4; 183; 194; 278; 288; 294; 318; 387; 393; 452; 462; 470; 499; 517; 540; 546; 556; 563; 609; 615; 631; 634; 637; 644; 681; 686; 704; 710	373	28	4; 194; 288; 294; 452; 470; 609; 615; 631; 634; 637; 644; 681; 686; 704; 710	217	16
BirA_mCh_m6a	215	215	215		57	[R].HSTGGMDELYKSQVPSKGR.[I]	HSTGGMDELYkSQVPSkGR	[K11; K17](Biotin)	849.061	3	609; 615	2	GGMDELYkSQVPSKG; YKSQVPSkGRIFLVQ	215	2	2	2	2	843.73	843.729	849.061	843.73	3	3	3	3	6	9	20	9	2.62593e+08	2.91383e+08	1168038132	1.20415e+09	15	29	4; 183; 194; 278; 288; 294; 318; 387; 393; 452; 462; 470; 499; 517; 540; 546; 556; 563; 609; 615; 631; 634; 637; 644; 681; 686; 704; 710	373	28	4; 194; 288; 294; 452; 470; 609; 615; 631; 634; 637; 644; 681; 686; 704; 710	217	16
BirA_mCh_m6a	215	215	215		57	[R].IFLVQDGQVRDPEKVTKEFK.[Q]	IFLVQDGQVRDPEKVTKEFK	[K](Biotin)			X	3
BirA_mCh_m6a	215	215	215		57	[K].SQVPSKGR.[I]	SQVPSkGR	[K6](Biotin)	542.783	3	615	1	YKSQVPSkGRIFLVQ	215	1	1	1	1	542.783	362.19	542.783	362.19	2	3	2	3	3	5	6	15	1957342728	7.22268e+07	10674843940	8.12733e+09	8	21	4; 183; 194; 278; 288; 294; 318; 387; 393; 452; 462; 470; 499; 517; 540; 546; 556; 563; 609; 615; 631; 634; 637; 644; 681; 686; 704; 710	373	28	4; 194; 288; 294; 452; 470; 609; 615; 631; 634; 637; 644; 681; 686; 704; 710	217	16
BirA_mCh_m6a	215	215	215		57	[K].LKDGGHYDAEVK.[T]	LkDGGHYDAEVK	[K2](Biotin)	519.917	3	546	1	IKQRLKLkDGGHYDA	215	0	0	1	1			519.917	519.917			3	3	0	0	1	1	0	0	646161	781835	0	2	4; 183; 194; 278; 288; 294; 318; 387; 393; 452; 462; 470; 499; 517; 540; 546; 556; 563; 609; 615; 631; 634; 637; 644; 681; 686; 704; 710	373	28	4; 194; 288; 294; 452; 470; 609; 615; 631; 634; 637; 644; 681; 686; 704; 710	217	16
BirA_mCh_m6a	215	215	215		57	[R].FESDLKNIFVK.[N]	FESDLkNIFVK	[K6](Biotin)	783.406	2	681	1	YRFESDLkNIFVKNN	215	0	1	1	1		783.406	783.406	783.406		2	2	2	0	1	1	2	0	595671	2.71583e+06	3.32039e+06	1	3	4; 183; 194; 278; 288; 294; 318; 387; 393; 452; 462; 470; 499; 517; 540; 546; 556; 563; 609; 615; 631; 634; 637; 644; 681; 686; 704; 710	373	28	4; 194; 288; 294; 452; 470; 609; 615; 631; 634; 637; 644; 681; 686; 704; 710	217	16
BirA_mCh_m6a	215	215	215		57	[K].EFKQGLFLR.[K]	EFkQGLFLR	[K3](Biotin)	682.364	2	637	1	EKVTKEFkQGLFLRK	215	1	1	1	1	682.364	682.364	682.363	682.364	2	2	2	2	20	12	50	30	6.76852e+08	5.24152e+08	2.61884e+09	2.06195e+09	32	80	4; 183; 194; 278; 288; 294; 318; 387; 393; 452; 462; 470; 499; 517; 540; 546; 556; 563; 609; 615; 631; 634; 637; 644; 681; 686; 704; 710	373	28	4; 194; 288; 294; 452; 470; 609; 615; 631; 634; 637; 644; 681; 686; 704; 710	217	16
BirA_mCh_m6a	215	215	215		57	[K].LDNFINRPVKLIIGDK.[E]	LDNFINRPVkLIIGDK	[K10](Biotin)	694.392	3	288	1	NFINRPVkLIIGDKE	215	0	1	1	1		694.392	694.391	694.392		3	3	3	0	1	1	1	0	278395	635663	1.06395e+06	1	2	4; 183; 194; 278; 288; 294; 318; 387; 393; 452; 462; 470; 499; 517; 540; 546; 556; 563; 609; 615; 631; 634; 637; 644; 681; 686; 704; 710	373	28	4; 194; 288; 294; 452; 470; 609; 615; 631; 634; 637; 644; 681; 686; 704; 710	217	16
BirA_mCh_m6a	215	215	215		57	[K].AYVKHPADIPDYLK.[L]	AYVkHPADIPDYLK	[K4](Biotin)	619.319	3	452	1	YGSKAYVkHPADIPD	215	1	1	1	1	619.319	619.319	619.317	619.319	3	3	3	3	1	1	1	1	779498	571141	1.75576e+06	1.55369e+06	2	2	4; 183; 194; 278; 288; 294; 318; 387; 393; 452; 462; 470; 499; 517; 540; 546; 556; 563; 609; 615; 631; 634; 637; 644; 681; 686; 704; 710	373	28	4; 194; 288; 294; 452; 470; 609; 615; 631; 634; 637; 644; 681; 686; 704; 710	217	16
BirA_mCh_m6a	215	215	215		57	[K].VTKEFKQGLFLRK.[S]	VTKEFkQGLFLRK	[K6](Biotin)	455.762	4	637	3	EKVTKEFkQGLFLRK	215	1	1	1	1	455.761	455.762	455.762	455.761	4	4	4	4	1	1	2	1	380053	266030	1.26287e+06	476781	2	3	4; 183; 194; 278; 288; 294; 318; 387; 393; 452; 462; 470; 499; 517; 540; 546; 556; 563; 609; 615; 631; 634; 637; 644; 681; 686; 704; 710	373	28	4; 194; 288; 294; 452; 470; 609; 615; 631; 634; 637; 644; 681; 686; 704; 710	217	16
BirA_mCh_m6a	215	215	215		57	[R].QQLQILRDKEIIEFKGR.[G]	QQLQILRDKEIIEFkGR	[K15](Biotin)	780.767	4	710	3	DKEIIEFkGRGKYRK	215	1	1	1	1	780.767	585.828	585.828	585.828	3	4	4	4	2	2	1	1	269736	643252	354054	1.4594e+06	4	2	4; 183; 194; 278; 288; 294; 318; 387; 393; 452; 462; 470; 499; 517; 540; 546; 556; 563; 609; 615; 631; 634; 637; 644; 681; 686; 704; 710	373	28	4; 194; 288; 294; 452; 470; 609; 615; 631; 634; 637; 644; 681; 686; 704; 710	217	16
BirA_mCh_m6a	215	215	215		57	[R].HSTGGMDELYKSQVPSKGR.[I]	HSTGGMDELYKSQVPSKGR	[K](Biotin)			X	2
BirA_mCh_m6a	215	215	215		57	[K].NIFVKNNHIKEK.[I]	NIFVkNNHIKEK	[K5](Biotin)	855.462	4	686	2	DLKNIFVkNNHIKEK	215	1	1	1	1	428.234	855.462	428.234	855.461	4	2	4	2	3	2	3	3	4726978	3.74967e+06	1.11841e+07	7.32179e+06	5	6	4; 183; 194; 278; 288; 294; 318; 387; 393; 452; 462; 470; 499; 517; 540; 546; 556; 563; 609; 615; 631; 634; 637; 644; 681; 686; 704; 710	373	28	4; 194; 288; 294; 452; 470; 609; 615; 631; 634; 637; 644; 681; 686; 704; 710	217	16
BirA_mCh_m6a	215	215	215		57	[R].HSTGGMDELYKSQVPSKGR.[I]	HSTGGMDELYKSQVPSKGR	[K](Biotin)			X	2
BirA_mCh_m6a	215	215	215		57	[K].NIFVKNNHIK.[E]	NIFVkNNHIK	[K5](Biotin)	726.893	3	686	1	DLKNIFVkNNHIKEK	215	1	1	1	1	484.931	484.931	726.893	484.931	3	3	2	3	2	2	2	2	5907637	4.3711e+06	7626155	6.41183e+06	4	4	4; 183; 194; 278; 288; 294; 318; 387; 393; 452; 462; 470; 499; 517; 540; 546; 556; 563; 609; 615; 631; 634; 637; 644; 681; 686; 704; 710	373	28	4; 194; 288; 294; 452; 470; 609; 615; 631; 634; 637; 644; 681; 686; 704; 710	217	16
BirA_mCh_m6a	215	215	215		57	[K].EIIEFKGR.[G]	EIIEFkGR	[K6](Biotin)	609.323	2	710	1	DKEIIEFkGRGKYRK	215	0	1	1	1		609.323	609.321	609.321		2	2	2	0	1	1	1	0	154169	347810	174003	1	2	4; 183; 194; 278; 288; 294; 318; 387; 393; 452; 462; 470; 499; 517; 540; 546; 556; 563; 609; 615; 631; 634; 637; 644; 681; 686; 704; 710	373	28	4; 194; 288; 294; 452; 470; 609; 615; 631; 634; 637; 644; 681; 686; 704; 710	217	16
BirA_mCh_m6a	215	215	215		57	[R].KLAGILVELTGK.[T]	kLAGILVELTGK	[K1](Biotin)	734.434	3	194	1	DLYLQDRkLAGILVE	215	1	1	1	1	734.434	489.958	734.434	734.434	2	3	2	2	4	5	3	9	23767073	19727196	7.93263e+06	1.04786e+08	9	12	4; 183; 194; 278; 288; 294; 318; 387; 393; 452; 462; 470; 499; 517; 540; 546; 556; 563; 609; 615; 631; 634; 637; 644; 681; 686; 704; 710	373	28	4; 194; 288; 294; 452; 470; 609; 615; 631; 634; 637; 644; 681; 686; 704; 710	217	16
BirA_mCh_m6a	215	215	215		57	[K].LIIGDKEIFGISR.[G]	LIIGDkEIFGISR	[K6](Biotin)	843.968	3	294	1	VKLIIGDkEIFGISR	215	1	1	1	1	562.98	562.98	843.967	843.968	3	3	2	2	10	9	8	17	8.78374e+07	5.99708e+07	3.45371e+07	3.06336e+08	19	25	4; 183; 194; 278; 288; 294; 318; 387; 393; 452; 462; 470; 499; 517; 540; 546; 556; 563; 609; 615; 631; 634; 637; 644; 681; 686; 704; 710	373	28	4; 194; 288; 294; 452; 470; 609; 615; 631; 634; 637; 644; 681; 686; 704; 710	217	16
BirA_mCh_m6a	215	215	215		57	[R].KSSLSSR.[G]	kSSLSSR	[K1](Biotin)	495.756	2	644	1	KQGLFLRkSSLSSRG	215	1	0	1	1	495.756		495.756	495.755	2		2	2	1	0	2	2	41381624	0	64342548	49807828	1	4	4; 183; 194; 278; 288; 294; 318; 387; 393; 452; 462; 470; 499; 517; 540; 546; 556; 563; 609; 615; 631; 634; 637; 644; 681; 686; 704; 710	373	28	4; 194; 288; 294; 452; 470; 609; 615; 631; 634; 637; 644; 681; 686; 704; 710	217	16
BirA_mCh_m6a	215	215	215		57	[R].DKEIIEFKGR.[G]	DKEIIEFKGR	[K](Biotin)			X	2
BirA_mCh_m6a	215	215	215		57	[R].DKEIIEFKGR.[G]	DkEIIEFkGR	[K2; K8](Biotin)	562.95	3	704; 710	2	QLQILRDkEIIEFKG; DKEIIEFkGRGKYRK	215	2	0	2	0	562.949		562.95		3		3		1	0	1	0	56812.7	0	52327.6	0	1	1	4; 183; 194; 278; 288; 294; 318; 387; 393; 452; 462; 470; 499; 517; 540; 546; 556; 563; 609; 615; 631; 634; 637; 644; 681; 686; 704; 710	373	28	4; 194; 288; 294; 452; 470; 609; 615; 631; 634; 637; 644; 681; 686; 704; 710	217	16
BirA_mCh_m6a	215	215	215		57	[R].HSTGGMDELYKSQVPSK.[G]	HSTGGMDELYkSQVPSK	[K11](Biotin)	702.662	3	609	1	GGMDELYkSQVPSKG	215	1	1	1	1	702.662	702.66	697.327	702.659	3	3	3	3	16	14	19	15	2.20275e+08	1.57765e+08	6.22025e+08	5.64356e+07	30	34	4; 183; 194; 278; 288; 294; 318; 387; 393; 452; 462; 470; 499; 517; 540; 546; 556; 563; 609; 615; 631; 634; 637; 644; 681; 686; 704; 710	373	28	4; 194; 288; 294; 452; 470; 609; 615; 631; 634; 637; 644; 681; 686; 704; 710	217	16
BirA_mCh_m6a	215	215	215		57	[R].DKEIIEFK.[G]	DkEIIEFK	[K2](Biotin)	624.321	2	704	1	QLQILRDkEIIEFKG	215	1	1	1	1	624.321	624.321	624.321	624.321	2	2	2	2	2	3	2	2	48180032	3.4388e+07	32370608	11790060	5	4	4; 183; 194; 278; 288; 294; 318; 387; 393; 452; 462; 470; 499; 517; 540; 546; 556; 563; 609; 615; 631; 634; 637; 644; 681; 686; 704; 710	373	28	4; 194; 288; 294; 452; 470; 609; 615; 631; 634; 637; 644; 681; 686; 704; 710	217	16
BirA_mCh_m6a	215	215	215		57	[R].QQLQILRDKEIIEFK.[G]	QQLQILRDkEIIEFK	[K9](Biotin)	709.726	3	704	2	QLQILRDkEIIEFKG	215	1	0	0	1	709.726			709.726	3			3	1	0	0	1	169787	0	0	143501	1	1	4; 183; 194; 278; 288; 294; 318; 387; 393; 452; 462; 470; 499; 517; 540; 546; 556; 563; 609; 615; 631; 634; 637; 644; 681; 686; 704; 710	373	28	4; 194; 288; 294; 452; 470; 609; 615; 631; 634; 637; 644; 681; 686; 704; 710	217	16
BirA_mCh_m6a	215	215	215		57	[R].GIDKQGALLLEQDGIIKPWMGGEISLR.[S]	GIDKQGALLLEQDGIIKPWMGGEISLR	[K](Biotin)			X	1
BirA_mCh_m6a	215	215	215		57	[K].AYVKHPADIPDYLKLSFPEGFKWER.[V]	AYVKHPADIPDYLkLSFPEGFKWER	[K14](Biotin)	647.332	5	462	3	ADIPDYLkLSFPEGF	215	0	0	0	1				647.332				5	0	0	0	2	0	0	0	639143	0	2	4; 183; 194; 278; 288; 294; 318; 387; 393; 452; 462; 470; 499; 517; 540; 546; 556; 563; 609; 615; 631; 634; 637; 644; 681; 686; 704; 710	373	28	4; 194; 288; 294; 452; 470; 609; 615; 631; 634; 637; 644; 681; 686; 704; 710	217	16
BirA_mCh_m6a	215	215	215		57	[R].FKVHMEGSVNGHEFEIEGEGEGRPYEGTQTAK.[L]	FkVHMEGSVNGHEFEIEGEGEGRPYEGTQTAK	[K2](Biotin)	759.15	5	393	1	IKEFMRFkVHMEGSV	215	0	0	0	1				759.15				5	0	0	0	1	0	0	0	0	0	1	4; 183; 194; 278; 288; 294; 318; 387; 393; 452; 462; 470; 499; 517; 540; 546; 556; 563; 609; 615; 631; 634; 637; 644; 681; 686; 704; 710	373	28	4; 194; 288; 294; 452; 470; 609; 615; 631; 634; 637; 644; 681; 686; 704; 710	217	16
BirA_mCh_m6a	215	215	215		57	[K].GEEDNMAIIKEFMR.[F]	GEEDNMAIIkEFMR	[K10](Biotin)	636.959	3	387	1	EDNMAIIkEFMRFKV	215	0	0	0	1				636.959				3	0	0	0	1	0	0	0	17180.8	0	1	4; 183; 194; 278; 288; 294; 318; 387; 393; 452; 462; 470; 499; 517; 540; 546; 556; 563; 609; 615; 631; 634; 637; 644; 681; 686; 704; 710	373	28	4; 194; 288; 294; 452; 470; 609; 615; 631; 634; 637; 644; 681; 686; 704; 710	217	16
BirA_mCh_m6a	215	215	215		57	[K].KPVQLPGAYNVNIK.[L]	kPVQLPGAYNVNIK	[K1](Biotin)	589.659	3	563	0	KTTYKAKkPVQLPGA	215	0	0	1	0			589.659				3		0	0	1	0	0	0	67132.2	0	0	1	4; 183; 194; 278; 288; 294; 318; 387; 393; 452; 462; 470; 499; 517; 540; 546; 556; 563; 609; 615; 631; 634; 637; 644; 681; 686; 704; 710	373	28	4; 194; 288; 294; 452; 470; 609; 615; 631; 634; 637; 644; 681; 686; 704; 710	217	16
BirA_mCh_m6a	215	215	215		57	[R].VKWPNDLYLQDR.[K]	VkWPNDLYLQDR	[K2](Biotin)	886.948	2	183	1	GADKVRVkWPNDLYL	215	0	0	1	0			886.948				2		0	0	1	0	0	0	97373.6	0	0	1	4; 183; 194; 278; 288; 294; 318; 387; 393; 452; 462; 470; 499; 517; 540; 546; 556; 563; 609; 615; 631; 634; 637; 644; 681; 686; 704; 710	373	28	4; 194; 288; 294; 452; 470; 609; 615; 631; 634; 637; 644; 681; 686; 704; 710	217	16
Nes	18008	50363232	NP_057910.3	nestin [Mus musculus]	74	[R].VSSIFQEEEGQIWELVKK.[E]	VSSIFQEEEGQIWELVKK	[K](Biotin)			X	1
Nes	18008	50363232	NP_057910.3	nestin [Mus musculus]	74	[K].SLLEDKTHEILGSLEDR.[N]	SLLEDkTHEILGSLEDR	[K6](Biotin)	727.701	3	912	1	IKSLLEDkTHEILGS	50363232	0	0	0	1				727.701				3	0	0	0	1	0	0	0	54626.5	0	1	380; 401; 657; 745; 855; 912; 1024	10	7	380; 657; 745; 789; 855; 1024; 1416	13	7
Nes	18008	50363232	NP_057910.3	nestin [Mus musculus]	74	[R].TPTLASTPIPPMSEAPYPKNAEVR.[A]	TPTLASTPIPPMSEAPYPkNAEVR	[K19](Biotin)	931.807	3	401	1	MSEAPYPkNAEVRAQ	50363232	0	0	1	0			931.807				3		0	0	1	0	0	0	101868	0	0	1	380; 401; 657; 745; 855; 912; 1024	10	7	380; 657; 745; 789; 855; 1024; 1416	13	7
Nes	18008	50363232	NP_057910.3	nestin [Mus musculus]	74	[R].SLDENQETIVLLESKNQRPLR.[S]	SLDENQETIVLLESkNQRPLR	[K15](Biotin)	903.475	4	855	1	TIVLLESkNQRPLRS	50363232	1	1	1	1	903.472	677.856	903.474	903.475	3	4	3	3	1	2	2	1	1.21587e+06	892956	1.03346e+06	1.15145e+06	3	3	380; 401; 657; 745; 855; 912; 1024	10	7	380; 657; 745; 789; 855; 1024; 1416	13	7
Nes	18008	50363232	NP_057910.3	nestin [Mus musculus]	74	[R].SSQASLGFPDPKLK.[L]	SSQASLGFPDPKLK	[K](Biotin)			X	1
Nes	18008	50363232	NP_057910.3	nestin [Mus musculus]	74	[K].TQEFLKAR.[T]	TQEFLkAR	[K6](Biotin)	609.819	3	380	1	LKTQEFLkARTPTLA	50363232	1	1	1	1	609.819	406.881	609.819	609.819	2	3	2	2	1	2	1	1	2.03338e+06	1.47128e+06	1.73403e+06	1.28932e+06	3	2	380; 401; 657; 745; 855; 912; 1024	10	7	380; 657; 745; 789; 855; 1024; 1416	13	7
Nes	18008	50363232	NP_057910.3	nestin [Mus musculus]	74	[R].TGKPLEKENQESLR.[S]	TGKPLEKENQESLR	[K](Biotin)			X	1
Nes	18008	50363232	NP_057910.3	nestin [Mus musculus]	74	[R].IVKPLEKVSQVSLESLEKENVQSPR.[Y]	IVKPLEKVSQVSLESLEKENVQSPR	[K](Biotin)			X	2
Nes	18008	50363232	NP_057910.3	nestin [Mus musculus]	74	[R].SSEEQNLESLITFKEESQYPLGGPEAEDQMLER.[L]	SSEEQNLESLITFkEESQYPLGGPEAEDQMLER	[K14](Biotin)	1003.22	4	657	1	LESLITFkEESQYPL	50363232	0	1	0	1		1003.22		1003.21		4		4	0	1	0	1	0	57390.2	0	136580	1	1	380; 401; 657; 745; 855; 912; 1024	10	7	380; 657; 745; 789; 855; 1024; 1416	13	7
Nes	18008	50363232	NP_057910.3	nestin [Mus musculus]	74	[R].LLEKENQEPLRFEDAEDQVLER.[L]	LLEkENQEPLRFEDAEDQVLER	[K4](Biotin)	976.148	3	745	2	QAFRLLEkENQEPLR	50363232	1	0	1	0	976.148		976.148		3		3		1	0	1	0	96875.4	0	124482	0	1	1	380; 401; 657; 745; 855; 912; 1024	10	7	380; 657; 745; 789; 855; 1024; 1416	13	7
Nes	18008	50363232	NP_057910.3	nestin [Mus musculus]	74	[K].EAGALDSGIPELPKTSSETLECK.[G]	EAGALDSGIPELPkTSSETLECK	[K14](Biotin)	886.764	3	1416	1	SGIPELPkTSSETLE	50363232	1	1	0	0	886.763	886.764			3	3			1	1	0	0	177594	133364	0	0	2	0	380; 401; 657; 745; 855; 912; 1024	10	7	380; 657; 745; 789; 855; 1024; 1416	13	7
Nes	18008	50363232	NP_057910.3	nestin [Mus musculus]	74	[K].SLEDESQETFGSLEKENLESLR.[S]	SLEDESQETFGSLEkENLESLR	[K15](Biotin)	922.764	3	1024	1	ETFGSLEkENLESLR	50363232	1	1	0	0	922.764	922.764			3	3			1	1	0	0	38441.3	20407.4	0	0	2	0	380; 401; 657; 745; 855; 912; 1024	10	7	380; 657; 745; 789; 855; 1024; 1416	13	7
Nes	18008	50363232	NP_057910.3	nestin [Mus musculus]	74	[R].KSLEDESQETFGSLEKENLESLR.[S]	KSLEDESQETFGSLEkENLESLR	[K16](Biotin)	965.465	3	1024	2	ETFGSLEkENLESLR	50363232	0	0	1	0			965.465				3		0	0	1	0	0	0	0	0	0	1	380; 401; 657; 745; 855; 912; 1024	10	7	380; 657; 745; 789; 855; 1024; 1416	13	7
Nes	18008	50363232	NP_057910.3	nestin [Mus musculus]	74	[R].LLEKENQEPLRFEEAEDQVLER.[L]	LLEkENQEPLRFEEAEDQVLER	[K4](Biotin)	980.818	3	789	2	QAFRLLEkENQEPLR	50363232	0	1	0	0		980.818				3			0	1	0	0	0	128467	0	0	1	0	380; 401; 657; 745; 855; 912; 1024	10	7	380; 657; 745; 789; 855; 1024; 1416	13	7
Prpf8	192159	115583687	NP_619600.2	pre-mRNA-processing-splicing factor 8 [Mus musculus]	152	[R].TVNKHGDEIITSTTSNYETQTFSSK.[T]	TVNkHGDEIITSTTSNYETQTFSSK	[K4](Biotin)	1005.48	3	2049	1	TQTRTVNkHGDEIIT	115583687	1	1	1	0	1005.47	1005.47	1005.48		3	3	3		1	1	1	0	450462	244923	374188	0	2	1	2049	1	1	2049	2	1
Mybbp1a	18432	31982724	NP_058056.2	myb-binding protein 1A [Mus musculus]	106	[K].KHHQEALSTKEVIRK.[S]	KHHQEALSTkEVIRK	[K10](Biotin)	508.28	4	1297	3	HQEALSTkEVIRKSP	31982724	1	0	0	1	508.28			508.28	4			4	1	0	0	1	98096.1	0	0	58551.9	1	1	9; 1297; 1302	7	3	1243; 1297; 1302	8	3
Mybbp1a	18432	31982724	NP_058056.2	myb-binding protein 1A [Mus musculus]	106	[R].KSPHPQSALPK.[K]	kSPHPQSALPK	[K1](Biotin)	472.587	3	1302	1	STKEVIRkSPHPQSA	31982724	1	1	1	1	472.587	472.587	472.587	472.587	3	3	3	3	1	1	1	1	908898	580302	925736	698608	2	2	9; 1297; 1302	7	3	1243; 1297; 1302	8	3
Mybbp1a	18432	31982724	NP_058056.2	myb-binding protein 1A [Mus musculus]	106	[K].KHHQEALSTKEVIR.[K]	KHHQEALSTkEVIR	[K10](Biotin)	634.672	4	1297	2	HQEALSTkEVIRKSP	31982724	1	1	1	1	476.257	634.672	476.257	476.256	4	3	4	4	2	1	2	1	1.41505e+06	101780	1.17875e+06	764042	3	3	9; 1297; 1302	7	3	1243; 1297; 1302	8	3
Mybbp1a	18432	31982724	NP_058056.2	myb-binding protein 1A [Mus musculus]	106	[K].ASTPSQVNGITGAKSPAPSNPTLSPSTPAKTPK.[L]	ASTPSQVNGITGAkSPAPSNPTLSPSTPAKTPK	[K14](Biotin)	854.696	4	1243	2	VNGITGAkSPAPSNP	31982724	1	1	0	0	854.696	854.696			4	4			1	1	0	0	0	0	0	0	2	0	9; 1297; 1302	7	3	1243; 1297; 1302	8	3
Mybbp1a	18432	31982724	NP_058056.2	myb-binding protein 1A [Mus musculus]	106	[K].SPTKAEPATPAEAAQSDRHSLLEHSR.[E]	SPTkAEPATPAEAAQSDRHSLLEHSR	[K4](Biotin)	603.297	5	9	2	AEMKSPTkAEPATPA	31982724	0	0	1	0			603.297				5		0	0	1	0	0	0	0	0	0	1	9; 1297; 1302	7	3	1243; 1297; 1302	8	3
Hnrnpa2b1	53379	755517048	XP_006506436.2	heterogeneous nuclear ribonucleoproteins A2/B1 isoform X1 [Mus musculus]	19	[R].EESGKPGAHVTVKK.[L]	EESGKPGAHVTVKK	[K](Biotin)			X	1
Hnrnpa2b1	53379	755517048	XP_006506436.2	heterogeneous nuclear ribonucleoproteins A2/B1 isoform X1 [Mus musculus]	19	[-].MEKTLETVPLER.[K]	MEkTLETVPLER	[K3](Biotin)	857.433	3	3	1	MEkTLETVPL	755517048	1	1	1	1	857.431	571.956	857.43	857.433	2	3	2	2	2	3	2	3	657041	674938	562494	399156	5	5	3	6	1	3	6	1
Hnrnpa2b1	53379	755517048	XP_006506436.2	heterogeneous nuclear ribonucleoproteins A2/B1 isoform X1 [Mus musculus]	19	[-].MEKTLETVPLERK.[K]	MEkTLETVPLERK	[K3](Biotin)	614.654	3	3	2	MEkTLETVPL	755517048	1	0	1	0	614.654		614.654		3		3		1	0	1	0	249142	0	274912	0	1	1	3	6	1	3	6	1
Actc1	11464	14192922	NP_033738.1	actin, alpha cardiac muscle 1 [Mus musculus]	19	[K].IKIIAPPERK.[Y]	IkIIAPPERK	[K2](Biotin)	464.279	3	330	2	APSTMKIkIIAPPER	14192922	1	1	0	0	464.279	464.279			3	3			1	1	0	0	276580	206405	0	0	2	0				330	2	1
LOC102642938	102642938	568904639	XP_006544818.1	heterogeneous nuclear ribonucleoproteins A2/B1 isoform X1 [Mus musculus]	16	[R].EESGKPGAHVTVKK.[L]	EESGKPGAHVTVKK	[K](Biotin)			X	1
Hnrnpu	51810	160333923	NP_058085.2	heterogeneous nuclear ribonucleoprotein U [Mus musculus]	67	[K].NQSQGYNQWQQGQFWGQKPWSQHYHQGYY.[-]	NQSQGYNQWQQGQFWGQkPWSQHYHQGYY	[K18](Biotin)	971.928	4	789	0	QGQFWGQkPWSQHYH	160333923	1	1	1	1	971.928	971.927	971.927	971.928	4	4	4	4	1	1	1	1	176264	152546	197922	701927	2	2	12; 176; 181; 613; 789	12	5	176; 181; 210; 789	12	4
Hnrnpu	51810	160333923	NP_058085.2	heterogeneous nuclear ribonucleoprotein U [Mus musculus]	67	[R].QGQQQAGGDGKTEQK.[G]	QGQQQAGGDGkTEQK	[K11](Biotin)	595.945	3	210	1	QQAGGDGkTEQKGGD	160333923	0	1	0	0		595.945				3			0	1	0	0	0	66750.8	0	0	1	0	12; 176; 181; 613; 789	12	5	176; 181; 210; 789	12	4
Hnrnpu	51810	160333923	NP_058085.2	heterogeneous nuclear ribonucleoprotein U [Mus musculus]	67	[K].EAAGKSSGPTSLFAVTVAPPGAR.[Q]	EAAGkSSGPTSLFAVTVAPPGAR	[K5](Biotin)	799.749	3	181	1	AGKEAAGkSSGPTSL	160333923	1	1	1	1	799.746	799.749	799.746	799.747	3	3	3	3	1	2	1	2	1200145	1.38129e+06	1.27775e+06	1711292	3	3	12; 176; 181; 613; 789	12	5	176; 181; 210; 789	12	4
Hnrnpu	51810	160333923	NP_058085.2	heterogeneous nuclear ribonucleoprotein U [Mus musculus]	67	[K].LKVSELKEELK.[K]	LkVSELKEELK	[K2](Biotin)	514.625	3	12	2	PVNVKKLkVSELKEE	160333923	0	0	1	0			514.625				3		0	0	1	0	0	0	231269	0	0	1	12; 176; 181; 613; 789	12	5	176; 181; 210; 789	12	4
Hnrnpu	51810	160333923	NP_058085.2	heterogeneous nuclear ribonucleoprotein U [Mus musculus]	67	[R].GAGKEAAGKSSGPTSLFAVTVAPPGAR.[Q]	GAGKEAAGkSSGPTSLFAVTVAPPGAR	[K9](Biotin)	904.14	3	181	2	AGKEAAGkSSGPTSL	160333923	1	1	1	1	904.138	904.139	904.138	904.14	3	3	3	3	2	2	2	2	1.60008e+06	1.32714e+06	1.66041e+06	1.30168e+06	4	4	12; 176; 181; 613; 789	12	5	176; 181; 210; 789	12	4
Hnrnpu	51810	160333923	NP_058085.2	heterogeneous nuclear ribonucleoprotein U [Mus musculus]	67	[R].GAGKEAAGK.[S]	GAGkEAAGK	[K4](Biotin)	507.756	2	176	1	SQQRGAGkEAAGKSS	160333923	1	1	1	0	507.756	507.755	507.755		2	2	2		1	1	1	0	973986	140418	936600	0	2	1	12; 176; 181; 613; 789	12	5	176; 181; 210; 789	12	4
Hnrnpu	51810	160333923	NP_058085.2	heterogeneous nuclear ribonucleoprotein U [Mus musculus]	67	[K].DLPEHAVLKMK.[G]	DLPEHAVLKMk	[K11](Biotin)	502.932	3	613	1	EHAVLKMkGNFTLPE	160333923	0	0	0	1				502.932				3	0	0	0	1	0	0	0	0	0	1	12; 176; 181; 613; 789	12	5	176; 181; 210; 789	12	4
Acta2	11475	6671507	NP_031418.1	actin, aortic smooth muscle [Mus musculus]	19	[K].IKIIAPPERK.[Y]	IkIIAPPERK	[K2](Biotin)	464.279	3	330	2	APSTMKIkIIAPPER	6671507	1	1	0	0	464.279	464.279			3	3			1	1	0	0	276580	206405	0	0	2	0				330	2	1
Hnrnpa3	229279	157277969	NP_444493.1	heterogeneous nuclear ribonucleoprotein A3 isoform c [Mus musculus]	20	[K].YGKIETIEVMEDR.[Q]	YGkIETIEVMEDR	[K3](Biotin)	904.933	2	129	1	DYFEKYGkIETIEVM	157277969	0	0	1	0			904.933				2		0	0	1	0	0	0	229957	0	0	1	129	1	1
Mki67	17345	169234624	NP_001074586.2	antigen KI-67 [Mus musculus]	312	[K].IVSNKLESVEEQVSTVMKTEEMEAK.[R]	IVSNkLESVEEQVSTVMKTEEMEAK	[K5](Biotin)	1022.17	3	2995	2	HLKIVSNkLESVEEQ	169234624	0	0	0	1				1022.17				3	0	0	0	1	0	0	0	80291.2	0	1	169; 289; 292; 351; 357; 508; 599; 666; 675; 685; 748; 785; 806; 831; 853; 945; 976; 999; 1034; 1047; 1050; 1057; 1113; 1136; 1261; 1377; 1420; 1438; 1464; 1604; 1621; 1646; 1668; 1696; 1732; 2027; 2087; 2204; 2344; 2369; 2662; 2995	104	42	289; 292; 351; 357; 508; 599; 666; 675; 685; 748; 785; 806; 831; 853; 945; 999; 1047; 1136; 1420; 1604; 1621; 1646; 2027; 2087; 2204; 2344; 2369	68	27
Mki67	17345	169234624	NP_001074586.2	antigen KI-67 [Mus musculus]	312	[R].SIKHENTVQTPKNVHNITDLEK.[K]	SIKHENTVQTPkNVHNITDLEK	[K12](Biotin)	693.611	4	785	2	ENTVQTPkNVHNITD	169234624	1	0	1	0	693.611		693.609		4		4		1	0	1	0	0	0	212819	0	1	1	169; 289; 292; 351; 357; 508; 599; 666; 675; 685; 748; 785; 806; 831; 853; 945; 976; 999; 1034; 1047; 1050; 1057; 1113; 1136; 1261; 1377; 1420; 1438; 1464; 1604; 1621; 1646; 1668; 1696; 1732; 2027; 2087; 2204; 2344; 2369; 2662; 2995	104	42	289; 292; 351; 357; 508; 599; 666; 675; 685; 748; 785; 806; 831; 853; 945; 999; 1047; 1136; 1420; 1604; 1621; 1646; 2027; 2087; 2204; 2344; 2369	68	27
Mki67	17345	169234624	NP_001074586.2	antigen KI-67 [Mus musculus]	312	[K].AIMEIPKETLQTAADGTR.[L]	AIMEIPkETLQTAADGTR	[K7](Biotin)	729.698	3	1646	1	KAIMEIPkETLQTAA	169234624	1	1	1	1	724.365	724.367	729.698	724.366	3	3	3	3	1	1	3	1	515427	367200	1.36599e+06	756127	2	4	169; 289; 292; 351; 357; 508; 599; 666; 675; 685; 748; 785; 806; 831; 853; 945; 976; 999; 1034; 1047; 1050; 1057; 1113; 1136; 1261; 1377; 1420; 1438; 1464; 1604; 1621; 1646; 1668; 1696; 1732; 2027; 2087; 2204; 2344; 2369; 2662; 2995	104	42	289; 292; 351; 357; 508; 599; 666; 675; 685; 748; 785; 806; 831; 853; 945; 999; 1047; 1136; 1420; 1604; 1621; 1646; 2027; 2087; 2204; 2344; 2369	68	27
Mki67	17345	169234624	NP_001074586.2	antigen KI-67 [Mus musculus]	312	[K].SSCASQKVMQTLTLGEDHGR.[E]	SSCASQkVMQTLTLGEDHGR	[K7](Biotin)	811.045	3	2344	1	KSSCASQkVMQTLTL	169234624	1	0	1	1	811.044		811.045	811.043	3		3	3	1	0	1	1	0	0	244412	201959	1	2	169; 289; 292; 351; 357; 508; 599; 666; 675; 685; 748; 785; 806; 831; 853; 945; 976; 999; 1034; 1047; 1050; 1057; 1113; 1136; 1261; 1377; 1420; 1438; 1464; 1604; 1621; 1646; 1668; 1696; 1732; 2027; 2087; 2204; 2344; 2369; 2662; 2995	104	42	289; 292; 351; 357; 508; 599; 666; 675; 685; 748; 785; 806; 831; 853; 945; 999; 1047; 1136; 1420; 1604; 1621; 1646; 2027; 2087; 2204; 2344; 2369	68	27
Mki67	17345	169234624	NP_001074586.2	antigen KI-67 [Mus musculus]	312	[K].ILKLECEDIKALK.[Q]	ILKLECEDIkALK	[K10](Biotin)	600.332	3	1057	2	KLECEDIkALKQSEN	169234624	0	0	1	0			600.332				3		0	0	1	0	0	0	125559	0	0	1	169; 289; 292; 351; 357; 508; 599; 666; 675; 685; 748; 785; 806; 831; 853; 945; 976; 999; 1034; 1047; 1050; 1057; 1113; 1136; 1261; 1377; 1420; 1438; 1464; 1604; 1621; 1646; 1668; 1696; 1732; 2027; 2087; 2204; 2344; 2369; 2662; 2995	104	42	289; 292; 351; 357; 508; 599; 666; 675; 685; 748; 785; 806; 831; 853; 945; 999; 1047; 1136; 1420; 1604; 1621; 1646; 2027; 2087; 2204; 2344; 2369	68	27
Mki67	17345	169234624	NP_001074586.2	antigen KI-67 [Mus musculus]	312	[K].SSCASQKVMQTLTLGEDHGRETK.[D]	SSCASQkVMQTLTLGEDHGRETK	[K7](Biotin)	698.082	4	2344	2	KSSCASQkVMQTLTL	169234624	1	0	0	1	698.082			698.081	4			4	1	0	0	1	121370	0	0	249872	1	1	169; 289; 292; 351; 357; 508; 599; 666; 675; 685; 748; 785; 806; 831; 853; 945; 976; 999; 1034; 1047; 1050; 1057; 1113; 1136; 1261; 1377; 1420; 1438; 1464; 1604; 1621; 1646; 1668; 1696; 1732; 2027; 2087; 2204; 2344; 2369; 2662; 2995	104	42	289; 292; 351; 357; 508; 599; 666; 675; 685; 748; 785; 806; 831; 853; 945; 999; 1047; 1136; 1420; 1604; 1621; 1646; 2027; 2087; 2204; 2344; 2369	68	27
Mki67	17345	169234624	NP_001074586.2	antigen KI-67 [Mus musculus]	312	[R].EQKVDQQVQDNENAPQR.[C]	EQkVDQQVQDNENAPQR	[K3](Biotin)	751.351	3	853	1	RGTFREQkVDQQVQD	169234624	1	1	1	1	751.349	751.351	751.35	751.35	3	3	3	3	1	1	1	1	98578.6	0	263130	204434	2	2	169; 289; 292; 351; 357; 508; 599; 666; 675; 685; 748; 785; 806; 831; 853; 945; 976; 999; 1034; 1047; 1050; 1057; 1113; 1136; 1261; 1377; 1420; 1438; 1464; 1604; 1621; 1646; 1668; 1696; 1732; 2027; 2087; 2204; 2344; 2369; 2662; 2995	104	42	289; 292; 351; 357; 508; 599; 666; 675; 685; 748; 785; 806; 831; 853; 945; 999; 1047; 1136; 1420; 1604; 1621; 1646; 2027; 2087; 2204; 2344; 2369	68	27
Mki67	17345	169234624	NP_001074586.2	antigen KI-67 [Mus musculus]	312	[K].TGLSKVDVREDPSTLGK.[K]	TGLSkVDVREDPSTLGK	[K5](Biotin)	676.685	3	2204	2	LSKTGLSkVDVREDP	169234624	0	0	1	0			676.685				3		0	0	1	0	0	0	217863	0	0	1	169; 289; 292; 351; 357; 508; 599; 666; 675; 685; 748; 785; 806; 831; 853; 945; 976; 999; 1034; 1047; 1050; 1057; 1113; 1136; 1261; 1377; 1420; 1438; 1464; 1604; 1621; 1646; 1668; 1696; 1732; 2027; 2087; 2204; 2344; 2369; 2662; 2995	104	42	289; 292; 351; 357; 508; 599; 666; 675; 685; 748; 785; 806; 831; 853; 945; 999; 1047; 1136; 1420; 1604; 1621; 1646; 2027; 2087; 2204; 2344; 2369	68	27
Mki67	17345	169234624	NP_001074586.2	antigen KI-67 [Mus musculus]	312	[K].KVDMKEESSALTKR.[I]	KVDMKEESSALTkR	[K13](Biotin)	616.649	3	1034	3	EESSALTkRIHMPGE	169234624	0	0	0	1				616.649				3	0	0	0	1	0	0	0	90283.9	0	1	169; 289; 292; 351; 357; 508; 599; 666; 675; 685; 748; 785; 806; 831; 853; 945; 976; 999; 1034; 1047; 1050; 1057; 1113; 1136; 1261; 1377; 1420; 1438; 1464; 1604; 1621; 1646; 1668; 1696; 1732; 2027; 2087; 2204; 2344; 2369; 2662; 2995	104	42	289; 292; 351; 357; 508; 599; 666; 675; 685; 748; 785; 806; 831; 853; 945; 999; 1047; 1136; 1420; 1604; 1621; 1646; 2027; 2087; 2204; 2344; 2369	68	27
Mki67	17345	169234624	NP_001074586.2	antigen KI-67 [Mus musculus]	312	[R].TPKDITGFQDSFQIPDHANGPLVVVK.[T]	TPkDITGFQDSFQIPDHANGPLVVVK	[K3](Biotin)	1017.19	3	1438	1	RKQSRTPkDITGFQD	169234624	0	0	1	0			1017.19				3		0	0	1	0	0	0	53373.5	0	0	1	169; 289; 292; 351; 357; 508; 599; 666; 675; 685; 748; 785; 806; 831; 853; 945; 976; 999; 1034; 1047; 1050; 1057; 1113; 1136; 1261; 1377; 1420; 1438; 1464; 1604; 1621; 1646; 1668; 1696; 1732; 2027; 2087; 2204; 2344; 2369; 2662; 2995	104	42	289; 292; 351; 357; 508; 599; 666; 675; 685; 748; 785; 806; 831; 853; 945; 999; 1047; 1136; 1420; 1604; 1621; 1646; 2027; 2087; 2204; 2344; 2369	68	27
Mki67	17345	169234624	NP_001074586.2	antigen KI-67 [Mus musculus]	312	[K].ILKLECEDIK.[A]	ILkLECEDIK	[K3](Biotin)	743.887	2	1050	1	RHNPKILkLECEDIK	169234624	0	0	1	0			743.887				2		0	0	1	0	0	0	583915	0	0	1	169; 289; 292; 351; 357; 508; 599; 666; 675; 685; 748; 785; 806; 831; 853; 945; 976; 999; 1034; 1047; 1050; 1057; 1113; 1136; 1261; 1377; 1420; 1438; 1464; 1604; 1621; 1646; 1668; 1696; 1732; 2027; 2087; 2204; 2344; 2369; 2662; 2995	104	42	289; 292; 351; 357; 508; 599; 666; 675; 685; 748; 785; 806; 831; 853; 945; 999; 1047; 1136; 1420; 1604; 1621; 1646; 2027; 2087; 2204; 2344; 2369	68	27
Mki67	17345	169234624	NP_001074586.2	antigen KI-67 [Mus musculus]	312	[K].KSLPKIILR.[K]	KSLPkIILR	[K5](Biotin)	431.941	3	1604	2	INKKSLPkIILRKMD	169234624	0	1	0	1		431.941		431.941		3		3	0	1	0	1	0	430509	0	715638	1	1	169; 289; 292; 351; 357; 508; 599; 666; 675; 685; 748; 785; 806; 831; 853; 945; 976; 999; 1034; 1047; 1050; 1057; 1113; 1136; 1261; 1377; 1420; 1438; 1464; 1604; 1621; 1646; 1668; 1696; 1732; 2027; 2087; 2204; 2344; 2369; 2662; 2995	104	42	289; 292; 351; 357; 508; 599; 666; 675; 685; 748; 785; 806; 831; 853; 945; 999; 1047; 1136; 1420; 1604; 1621; 1646; 2027; 2087; 2204; 2344; 2369	68	27
Mki67	17345	169234624	NP_001074586.2	antigen KI-67 [Mus musculus]	312	[K].TGLSKVDVR.[QE]	TGLSkVDVR	[K5](Biotin)	600.825	2	1136	1	LSKTGLSkVDVRQEP	169234624	1	1	1	1	600.824	600.825	600.825	600.825	2	2	2	2	1	1	1	1	482430	243771	1.27943e+06	797350	2	2	169; 289; 292; 351; 357; 508; 599; 666; 675; 685; 748; 785; 806; 831; 853; 945; 976; 999; 1034; 1047; 1050; 1057; 1113; 1136; 1261; 1377; 1420; 1438; 1464; 1604; 1621; 1646; 1668; 1696; 1732; 2027; 2087; 2204; 2344; 2369; 2662; 2995	104	42	289; 292; 351; 357; 508; 599; 666; 675; 685; 748; 785; 806; 831; 853; 945; 999; 1047; 1136; 1420; 1604; 1621; 1646; 2027; 2087; 2204; 2344; 2369	68	27
Mki67	17345	169234624	NP_001074586.2	antigen KI-67 [Mus musculus]	312	[K].TDLSKVDVREDPSILGKK.[T]	TDLSkVDVREDPSILGKK	[K5](Biotin)	557.301	4	1377	3	LSKTDLSkVDVREDP	169234624	0	0	1	1			557.301	557.301			4	4	0	0	1	1	0	0	221620	136286	0	2	169; 289; 292; 351; 357; 508; 599; 666; 675; 685; 748; 785; 806; 831; 853; 945; 976; 999; 1034; 1047; 1050; 1057; 1113; 1136; 1261; 1377; 1420; 1438; 1464; 1604; 1621; 1646; 1668; 1696; 1732; 2027; 2087; 2204; 2344; 2369; 2662; 2995	104	42	289; 292; 351; 357; 508; 599; 666; 675; 685; 748; 785; 806; 831; 853; 945; 999; 1047; 1136; 1420; 1604; 1621; 1646; 2027; 2087; 2204; 2344; 2369	68	27
Mki67	17345	169234624	NP_001074586.2	antigen KI-67 [Mus musculus]	312	[R].YCSDPLIGNKQTR.[M]	YCSDPLIGNkQTR	[K10](Biotin)	593.284	3	1696	1	SDPLIGNkQTRMSLR	169234624	0	0	1	1			593.283	593.284			3	3	0	0	1	1	0	0	317626	209425	0	2	169; 289; 292; 351; 357; 508; 599; 666; 675; 685; 748; 785; 806; 831; 853; 945; 976; 999; 1034; 1047; 1050; 1057; 1113; 1136; 1261; 1377; 1420; 1438; 1464; 1604; 1621; 1646; 1668; 1696; 1732; 2027; 2087; 2204; 2344; 2369; 2662; 2995	104	42	289; 292; 351; 357; 508; 599; 666; 675; 685; 748; 785; 806; 831; 853; 945; 999; 1047; 1136; 1420; 1604; 1621; 1646; 2027; 2087; 2204; 2344; 2369	68	27
Mki67	17345	169234624	NP_001074586.2	antigen KI-67 [Mus musculus]	312	[K].TGLSKVDVREDPSILEKK.[T]	TGLSkVDVREDPSILEKK	[K5](Biotin)	560.805	4	2087	3	LSKTGLSkVDVREDP	169234624	1	0	1	1	560.805		560.803	560.804	4		4	4	1	0	1	1	283595	0	488754	360468	1	2	169; 289; 292; 351; 357; 508; 599; 666; 675; 685; 748; 785; 806; 831; 853; 945; 976; 999; 1034; 1047; 1050; 1057; 1113; 1136; 1261; 1377; 1420; 1438; 1464; 1604; 1621; 1646; 1668; 1696; 1732; 2027; 2087; 2204; 2344; 2369; 2662; 2995	104	42	289; 292; 351; 357; 508; 599; 666; 675; 685; 748; 785; 806; 831; 853; 945; 999; 1047; 1136; 1420; 1604; 1621; 1646; 2027; 2087; 2204; 2344; 2369	68	27
Mki67	17345	169234624	NP_001074586.2	antigen KI-67 [Mus musculus]	312	[K].TVTPGKLATR.[N]	TVTPGkLATR	[K6](Biotin)	635.354	2	357	1	HKTVTPGkLATRNQA	169234624	1	1	1	1	635.354	635.352	635.353	635.353	2	2	2	2	1	1	1	1	389662	212583	951930	607806	2	2	169; 289; 292; 351; 357; 508; 599; 666; 675; 685; 748; 785; 806; 831; 853; 945; 976; 999; 1034; 1047; 1050; 1057; 1113; 1136; 1261; 1377; 1420; 1438; 1464; 1604; 1621; 1646; 1668; 1696; 1732; 2027; 2087; 2204; 2344; 2369; 2662; 2995	104	42	289; 292; 351; 357; 508; 599; 666; 675; 685; 748; 785; 806; 831; 853; 945; 999; 1047; 1136; 1420; 1604; 1621; 1646; 2027; 2087; 2204; 2344; 2369	68	27
Mki67	17345	169234624	NP_001074586.2	antigen KI-67 [Mus musculus]	312	[R].HSVNLDEGESAQAVHKTVTPGK.[L]	HSVNLDEGESAQAVHkTVTPGK	[K16](Biotin)	844.083	4	351	1	ESAQAVHkTVTPGKL	169234624	1	1	1	1	844.083	633.313	633.314	633.313	3	4	4	4	2	1	2	2	732778	410441	1.62188e+06	1.25666e+06	3	4	169; 289; 292; 351; 357; 508; 599; 666; 675; 685; 748; 785; 806; 831; 853; 945; 976; 999; 1034; 1047; 1050; 1057; 1113; 1136; 1261; 1377; 1420; 1438; 1464; 1604; 1621; 1646; 1668; 1696; 1732; 2027; 2087; 2204; 2344; 2369; 2662; 2995	104	42	289; 292; 351; 357; 508; 599; 666; 675; 685; 748; 785; 806; 831; 853; 945; 999; 1047; 1136; 1420; 1604; 1621; 1646; 2027; 2087; 2204; 2344; 2369	68	27
Mki67	17345	169234624	NP_001074586.2	antigen KI-67 [Mus musculus]	312	[R].AQIEKVSVPARPYK.[M]	AQIEkVSVPARPYK	[K5](Biotin)	604.667	3	666	1	VGRAQIEkVSVPARP	169234624	1	1	1	1	604.666	604.667	604.666	604.666	3	3	3	3	1	1	1	1	1.68388e+06	1.03519e+06	3.69642e+06	2.89846e+06	2	2	169; 289; 292; 351; 357; 508; 599; 666; 675; 685; 748; 785; 806; 831; 853; 945; 976; 999; 1034; 1047; 1050; 1057; 1113; 1136; 1261; 1377; 1420; 1438; 1464; 1604; 1621; 1646; 1668; 1696; 1732; 2027; 2087; 2204; 2344; 2369; 2662; 2995	104	42	289; 292; 351; 357; 508; 599; 666; 675; 685; 748; 785; 806; 831; 853; 945; 999; 1047; 1136; 1420; 1604; 1621; 1646; 2027; 2087; 2204; 2344; 2369	68	27
Mki67	17345	169234624	NP_001074586.2	antigen KI-67 [Mus musculus]	312	[K].QKLESIENLTGLRK.[Q]	QkLESIENLTGLRK	[K2](Biotin)	619.01	3	1420	2	YMETPKQkLESIENL	169234624	1	0	1	1	619.008		619.01	619.008	3		3	3	1	0	1	1	103673	0	378932	187953	1	2	169; 289; 292; 351; 357; 508; 599; 666; 675; 685; 748; 785; 806; 831; 853; 945; 976; 999; 1034; 1047; 1050; 1057; 1113; 1136; 1261; 1377; 1420; 1438; 1464; 1604; 1621; 1646; 1668; 1696; 1732; 2027; 2087; 2204; 2344; 2369; 2662; 2995	104	42	289; 292; 351; 357; 508; 599; 666; 675; 685; 748; 785; 806; 831; 853; 945; 999; 1047; 1136; 1420; 1604; 1621; 1646; 2027; 2087; 2204; 2344; 2369	68	27
Mki67	17345	169234624	NP_001074586.2	antigen KI-67 [Mus musculus]	312	[K].KIPSKSPHTQPVR.[T]	KIPSkSPHTQPVR	[K5](Biotin)	425.987	4	1113	2	IIKKIPSkSPHTQPV	169234624	0	0	1	1			425.987	425.987			4	4	0	0	1	1	0	0	230580	218598	0	2	169; 289; 292; 351; 357; 508; 599; 666; 675; 685; 748; 785; 806; 831; 853; 945; 976; 999; 1034; 1047; 1050; 1057; 1113; 1136; 1261; 1377; 1420; 1438; 1464; 1604; 1621; 1646; 1668; 1696; 1732; 2027; 2087; 2204; 2344; 2369; 2662; 2995	104	42	289; 292; 351; 357; 508; 599; 666; 675; 685; 748; 785; 806; 831; 853; 945; 999; 1047; 1136; 1420; 1604; 1621; 1646; 2027; 2087; 2204; 2344; 2369	68	27
Mki67	17345	169234624	NP_001074586.2	antigen KI-67 [Mus musculus]	312	[R].KSLGTHSPAVLKTIIK.[E]	KSLGTHSPAVLkTIIK	[K12](Biotin)	640.378	4	508	2	THSPAVLkTIIKERP	169234624	1	1	1	1	480.535	640.378	480.534	480.534	4	3	4	4	2	2	2	2	2.18639e+06	1.85856e+06	6.08979e+06	3.7377e+06	4	4	169; 289; 292; 351; 357; 508; 599; 666; 675; 685; 748; 785; 806; 831; 853; 945; 976; 999; 1034; 1047; 1050; 1057; 1113; 1136; 1261; 1377; 1420; 1438; 1464; 1604; 1621; 1646; 1668; 1696; 1732; 2027; 2087; 2204; 2344; 2369; 2662; 2995	104	42	289; 292; 351; 357; 508; 599; 666; 675; 685; 748; 785; 806; 831; 853; 945; 999; 1047; 1136; 1420; 1604; 1621; 1646; 2027; 2087; 2204; 2344; 2369	68	27
Mki67	17345	169234624	NP_001074586.2	antigen KI-67 [Mus musculus]	312	[K].VGKIWTER.[W]	VGkIWTER	[K3](Biotin)	607.822	2	292	1	ASSPKVGkIWTERWR	169234624	1	0	1	0	607.822		607.821		2		2		1	0	1	0	216981	0	512929	0	1	1	169; 289; 292; 351; 357; 508; 599; 666; 675; 685; 748; 785; 806; 831; 853; 945; 976; 999; 1034; 1047; 1050; 1057; 1113; 1136; 1261; 1377; 1420; 1438; 1464; 1604; 1621; 1646; 1668; 1696; 1732; 2027; 2087; 2204; 2344; 2369; 2662; 2995	104	42	289; 292; 351; 357; 508; 599; 666; 675; 685; 748; 785; 806; 831; 853; 945; 999; 1047; 1136; 1420; 1604; 1621; 1646; 2027; 2087; 2204; 2344; 2369	68	27
Mki67	17345	169234624	NP_001074586.2	antigen KI-67 [Mus musculus]	312	[K].SPQPEEKETLAGLKR.[Q]	SPQPEEKETLAGLkR	[K14](Biotin)	637	3	2662	2	KETLAGLkRQLRIQL	169234624	0	0	1	1			637	636.999			3	3	0	0	1	1	0	0	264814	265158	0	2	169; 289; 292; 351; 357; 508; 599; 666; 675; 685; 748; 785; 806; 831; 853; 945; 976; 999; 1034; 1047; 1050; 1057; 1113; 1136; 1261; 1377; 1420; 1438; 1464; 1604; 1621; 1646; 1668; 1696; 1732; 2027; 2087; 2204; 2344; 2369; 2662; 2995	104	42	289; 292; 351; 357; 508; 599; 666; 675; 685; 748; 785; 806; 831; 853; 945; 999; 1047; 1136; 1420; 1604; 1621; 1646; 2027; 2087; 2204; 2344; 2369	68	27
Mki67	17345	169234624	NP_001074586.2	antigen KI-67 [Mus musculus]	312	[R].HNPKILKLECEDIK.[A]	HNPkILKLECEDIK	[K4](Biotin)	655.012	4	1047	2	GESRHNPkILKLECE	169234624	1	1	1	1	655.012	491.509	655.011	655.01	3	4	3	3	2	2	2	2	4.16494e+06	2666818	8654008	6759609	4	4	169; 289; 292; 351; 357; 508; 599; 666; 675; 685; 748; 785; 806; 831; 853; 945; 976; 999; 1034; 1047; 1050; 1057; 1113; 1136; 1261; 1377; 1420; 1438; 1464; 1604; 1621; 1646; 1668; 1696; 1732; 2027; 2087; 2204; 2344; 2369; 2662; 2995	104	42	289; 292; 351; 357; 508; 599; 666; 675; 685; 748; 785; 806; 831; 853; 945; 999; 1047; 1136; 1420; 1604; 1621; 1646; 2027; 2087; 2204; 2344; 2369	68	27
Mki67	17345	169234624	NP_001074586.2	antigen KI-67 [Mus musculus]	312	[K].SLGTHSPAVLKTIIK.[E]	SLGTHSPAVLkTIIK	[K11](Biotin)	597.679	3	508	1	THSPAVLkTIIKERP	169234624	1	1	1	1	597.679	597.678	597.678	597.678	3	3	3	3	1	1	2	1	2.47134e+06	2.40323e+06	14243456	4.32893e+06	2	3	169; 289; 292; 351; 357; 508; 599; 666; 675; 685; 748; 785; 806; 831; 853; 945; 976; 999; 1034; 1047; 1050; 1057; 1113; 1136; 1261; 1377; 1420; 1438; 1464; 1604; 1621; 1646; 1668; 1696; 1732; 2027; 2087; 2204; 2344; 2369; 2662; 2995	104	42	289; 292; 351; 357; 508; 599; 666; 675; 685; 748; 785; 806; 831; 853; 945; 999; 1047; 1136; 1420; 1604; 1621; 1646; 2027; 2087; 2204; 2344; 2369	68	27
Mki67	17345	169234624	NP_001074586.2	antigen KI-67 [Mus musculus]	312	[K].RRPQTPKIR.[A]	RRPQTPkIR	[K7](Biotin)	459.935	3	2027	2	KRRPQTPkIRAQPLE	169234624	1	1	0	1	459.935	459.935		459.935	3	3		3	1	1	0	1	423441	143668	0	459877	2	1	169; 289; 292; 351; 357; 508; 599; 666; 675; 685; 748; 785; 806; 831; 853; 945; 976; 999; 1034; 1047; 1050; 1057; 1113; 1136; 1261; 1377; 1420; 1438; 1464; 1604; 1621; 1646; 1668; 1696; 1732; 2027; 2087; 2204; 2344; 2369; 2662; 2995	104	42	289; 292; 351; 357; 508; 599; 666; 675; 685; 748; 785; 806; 831; 853; 945; 999; 1047; 1136; 1420; 1604; 1621; 1646; 2027; 2087; 2204; 2344; 2369	68	27
Mki67	17345	169234624	NP_001074586.2	antigen KI-67 [Mus musculus]	312	[R].VLCKSPQVTTENITTNTKPQTSTSGK.[K]	VLCkSPQVTTENITTNTKPQTSTSGK	[K4](Biotin)	1016.18	3	999	1	DRTRVLCkSPQVTTE	169234624	1	1	1	1	1016.18	1016.18	1016.18	1016.18	3	3	3	3	2	1	2	2	453909	228288	1.58638e+06	1.31676e+06	3	4	169; 289; 292; 351; 357; 508; 599; 666; 675; 685; 748; 785; 806; 831; 853; 945; 976; 999; 1034; 1047; 1050; 1057; 1113; 1136; 1261; 1377; 1420; 1438; 1464; 1604; 1621; 1646; 1668; 1696; 1732; 2027; 2087; 2204; 2344; 2369; 2662; 2995	104	42	289; 292; 351; 357; 508; 599; 666; 675; 685; 748; 785; 806; 831; 853; 945; 999; 1047; 1136; 1420; 1604; 1621; 1646; 2027; 2087; 2204; 2344; 2369	68	27
Mki67	17345	169234624	NP_001074586.2	antigen KI-67 [Mus musculus]	312	[K].VDMKELSILEK.[Q]	VDMkELSILEK	[K4](Biotin)	765.901	2	1261	1	SLMKVDMkELSILEK	169234624	0	0	1	1			765.901	765.899			2	2	0	0	2	1	0	0	199900	124095	0	3	169; 289; 292; 351; 357; 508; 599; 666; 675; 685; 748; 785; 806; 831; 853; 945; 976; 999; 1034; 1047; 1050; 1057; 1113; 1136; 1261; 1377; 1420; 1438; 1464; 1604; 1621; 1646; 1668; 1696; 1732; 2027; 2087; 2204; 2344; 2369; 2662; 2995	104	42	289; 292; 351; 357; 508; 599; 666; 675; 685; 748; 785; 806; 831; 853; 945; 999; 1047; 1136; 1420; 1604; 1621; 1646; 2027; 2087; 2204; 2344; 2369	68	27
Mki67	17345	169234624	NP_001074586.2	antigen KI-67 [Mus musculus]	312	[K].AIMEIPKETLQTAADGTR.[L]	AIMEIPkETLQTAADGTR	[K7](Biotin)	729.698	3	1646	1	KAIMEIPkETLQTAA	169234624	1	1	1	1	724.365	724.367	729.698	724.366	3	3	3	3	1	1	3	1	515427	367200	1.36599e+06	756127	2	4	169; 289; 292; 351; 357; 508; 599; 666; 675; 685; 748; 785; 806; 831; 853; 945; 976; 999; 1034; 1047; 1050; 1057; 1113; 1136; 1261; 1377; 1420; 1438; 1464; 1604; 1621; 1646; 1668; 1696; 1732; 2027; 2087; 2204; 2344; 2369; 2662; 2995	104	42	289; 292; 351; 357; 508; 599; 666; 675; 685; 748; 785; 806; 831; 853; 945; 999; 1047; 1136; 1420; 1604; 1621; 1646; 2027; 2087; 2204; 2344; 2369	68	27
Mki67	17345	169234624	NP_001074586.2	antigen KI-67 [Mus musculus]	312	[K].GLSADSPASDGSKNSVSQDSSGHVEQHTGR.[N]	GLSADSPASDGSkNSVSQDSSGHVEQHTGR	[K13](Biotin)	806.615	4	169	1	SPASDGSkNSVSQDS	169234624	0	0	1	0			806.615				4		0	0	1	0	0	0	305815	0	0	1	169; 289; 292; 351; 357; 508; 599; 666; 675; 685; 748; 785; 806; 831; 853; 945; 976; 999; 1034; 1047; 1050; 1057; 1113; 1136; 1261; 1377; 1420; 1438; 1464; 1604; 1621; 1646; 1668; 1696; 1732; 2027; 2087; 2204; 2344; 2369; 2662; 2995	104	42	289; 292; 351; 357; 508; 599; 666; 675; 685; 748; 785; 806; 831; 853; 945; 999; 1047; 1136; 1420; 1604; 1621; 1646; 2027; 2087; 2204; 2344; 2369	68	27
Mki67	17345	169234624	NP_001074586.2	antigen KI-67 [Mus musculus]	312	[R].RHSVNLDEGESAQAVHKTVTPGK.[L]	RHSVNLDEGESAQAVHkTVTPGK	[K17](Biotin)	672.342	4	351	2	ESAQAVHkTVTPGKL	169234624	1	0	1	1	672.342		672.339	672.339	4		4	4	1	0	1	1	345379	0	531168	456779	1	2	169; 289; 292; 351; 357; 508; 599; 666; 675; 685; 748; 785; 806; 831; 853; 945; 976; 999; 1034; 1047; 1050; 1057; 1113; 1136; 1261; 1377; 1420; 1438; 1464; 1604; 1621; 1646; 1668; 1696; 1732; 2027; 2087; 2204; 2344; 2369; 2662; 2995	104	42	289; 292; 351; 357; 508; 599; 666; 675; 685; 748; 785; 806; 831; 853; 945; 999; 1047; 1136; 1420; 1604; 1621; 1646; 2027; 2087; 2204; 2344; 2369	68	27
Mki67	17345	169234624	NP_001074586.2	antigen KI-67 [Mus musculus]	312	[K].TGLSKVDVREDPSTLGKK.[T]	TGLSkVDVREDPSTLGKK	[K5](Biotin)	539.79	4	2204	3	LSKTGLSkVDVREDP	169234624	1	0	0	1	539.79			539.79	4			4	1	0	0	1	333109	0	0	501908	1	1	169; 289; 292; 351; 357; 508; 599; 666; 675; 685; 748; 785; 806; 831; 853; 945; 976; 999; 1034; 1047; 1050; 1057; 1113; 1136; 1261; 1377; 1420; 1438; 1464; 1604; 1621; 1646; 1668; 1696; 1732; 2027; 2087; 2204; 2344; 2369; 2662; 2995	104	42	289; 292; 351; 357; 508; 599; 666; 675; 685; 748; 785; 806; 831; 853; 945; 999; 1047; 1136; 1420; 1604; 1621; 1646; 2027; 2087; 2204; 2344; 2369	68	27
Mki67	17345	169234624	NP_001074586.2	antigen KI-67 [Mus musculus]	312	[K].KVNIIVYATK.[E]	kVNIIVYATK	[K1](Biotin)	687.896	2	945	1	DQGITEKkVNIIVYA	169234624	1	1	1	1	687.895	687.894	687.896	687.896	2	2	2	2	1	1	1	1	305405	210449	342098	787717	2	2	169; 289; 292; 351; 357; 508; 599; 666; 675; 685; 748; 785; 806; 831; 853; 945; 976; 999; 1034; 1047; 1050; 1057; 1113; 1136; 1261; 1377; 1420; 1438; 1464; 1604; 1621; 1646; 1668; 1696; 1732; 2027; 2087; 2204; 2344; 2369; 2662; 2995	104	42	289; 292; 351; 357; 508; 599; 666; 675; 685; 748; 785; 806; 831; 853; 945; 999; 1047; 1136; 1420; 1604; 1621; 1646; 2027; 2087; 2204; 2344; 2369	68	27
Mki67	17345	169234624	NP_001074586.2	antigen KI-67 [Mus musculus]	312	[K].QKLESIENLTGLR.[K]	QkLESIENLTGLR	[K2](Biotin)	863.966	3	1420	1	YMETPKQkLESIENL	169234624	1	0	1	1	863.966		863.963	576.311	2		2	3	2	0	2	1	121597	0	242852	83173.3	2	3	169; 289; 292; 351; 357; 508; 599; 666; 675; 685; 748; 785; 806; 831; 853; 945; 976; 999; 1034; 1047; 1050; 1057; 1113; 1136; 1261; 1377; 1420; 1438; 1464; 1604; 1621; 1646; 1668; 1696; 1732; 2027; 2087; 2204; 2344; 2369; 2662; 2995	104	42	289; 292; 351; 357; 508; 599; 666; 675; 685; 748; 785; 806; 831; 853; 945; 999; 1047; 1136; 1420; 1604; 1621; 1646; 2027; 2087; 2204; 2344; 2369	68	27
Mki67	17345	169234624	NP_001074586.2	antigen KI-67 [Mus musculus]	312	[K].SLPKIILR.[K]	SLPkIILR	[K4](Biotin)	583.361	2	1604	1	INKKSLPkIILRKMD	169234624	1	1	1	1	583.361	583.361	583.36	583.36	2	2	2	2	1	1	2	1	6577895	3.18034e+06	22089272	7112140	2	3	169; 289; 292; 351; 357; 508; 599; 666; 675; 685; 748; 785; 806; 831; 853; 945; 976; 999; 1034; 1047; 1050; 1057; 1113; 1136; 1261; 1377; 1420; 1438; 1464; 1604; 1621; 1646; 1668; 1696; 1732; 2027; 2087; 2204; 2344; 2369; 2662; 2995	104	42	289; 292; 351; 357; 508; 599; 666; 675; 685; 748; 785; 806; 831; 853; 945; 999; 1047; 1136; 1420; 1604; 1621; 1646; 2027; 2087; 2204; 2344; 2369	68	27
Mki67	17345	169234624	NP_001074586.2	antigen KI-67 [Mus musculus]	312	[K].TGLSKVDVREDPSILEK.[K]	TGLSkVDVREDPSILEK	[K5](Biotin)	704.705	3	2087	2	LSKTGLSkVDVREDP	169234624	0	0	1	0			704.705				3		0	0	1	0	0	0	349972	0	0	1	169; 289; 292; 351; 357; 508; 599; 666; 675; 685; 748; 785; 806; 831; 853; 945; 976; 999; 1034; 1047; 1050; 1057; 1113; 1136; 1261; 1377; 1420; 1438; 1464; 1604; 1621; 1646; 1668; 1696; 1732; 2027; 2087; 2204; 2344; 2369; 2662; 2995	104	42	289; 292; 351; 357; 508; 599; 666; 675; 685; 748; 785; 806; 831; 853; 945; 999; 1047; 1136; 1420; 1604; 1621; 1646; 2027; 2087; 2204; 2344; 2369	68	27
Mki67	17345	169234624	NP_001074586.2	antigen KI-67 [Mus musculus]	312	[K].SSGSTPVTAASSPKVGK.[I]	SSGSTPVTAASSPkVGK	[K14](Biotin)	596.306	3	289	1	VTAASSPkVGKIWTE	169234624	1	0	1	1	596.305		596.306	596.304	3		3	3	1	0	1	1	122060	0	285049	168725	1	2	169; 289; 292; 351; 357; 508; 599; 666; 675; 685; 748; 785; 806; 831; 853; 945; 976; 999; 1034; 1047; 1050; 1057; 1113; 1136; 1261; 1377; 1420; 1438; 1464; 1604; 1621; 1646; 1668; 1696; 1732; 2027; 2087; 2204; 2344; 2369; 2662; 2995	104	42	289; 292; 351; 357; 508; 599; 666; 675; 685; 748; 785; 806; 831; 853; 945; 999; 1047; 1136; 1420; 1604; 1621; 1646; 2027; 2087; 2204; 2344; 2369	68	27
Mki67	17345	169234624	NP_001074586.2	antigen KI-67 [Mus musculus]	312	[R].SGASEANLIVAKSWADVVK.[L]	SGASEANLIVAkSWADVVK	[K12](Biotin)	724.379	3	599	1	EANLIVAkSWADVVK	169234624	1	1	1	1	724.378	724.378	724.377	724.379	3	3	3	3	1	1	1	1	148292	81902.3	137134	276812	2	2	169; 289; 292; 351; 357; 508; 599; 666; 675; 685; 748; 785; 806; 831; 853; 945; 976; 999; 1034; 1047; 1050; 1057; 1113; 1136; 1261; 1377; 1420; 1438; 1464; 1604; 1621; 1646; 1668; 1696; 1732; 2027; 2087; 2204; 2344; 2369; 2662; 2995	104	42	289; 292; 351; 357; 508; 599; 666; 675; 685; 748; 785; 806; 831; 853; 945; 999; 1047; 1136; 1420; 1604; 1621; 1646; 2027; 2087; 2204; 2344; 2369	68	27
Mki67	17345	169234624	NP_001074586.2	antigen KI-67 [Mus musculus]	312	[K].VLLAQKLEPAIYVTR.[G]	VLLAQkLEPAIYVTR	[K6](Biotin)	970.557	3	2369	1	GKVLLAQkLEPAIYV	169234624	1	1	1	1	647.373	970.557	647.374	647.374	3	2	3	3	2	3	4	4	1.71363e+06	1.74687e+06	3362843	5.53013e+06	5	8	169; 289; 292; 351; 357; 508; 599; 666; 675; 685; 748; 785; 806; 831; 853; 945; 976; 999; 1034; 1047; 1050; 1057; 1113; 1136; 1261; 1377; 1420; 1438; 1464; 1604; 1621; 1646; 1668; 1696; 1732; 2027; 2087; 2204; 2344; 2369; 2662; 2995	104	42	289; 292; 351; 357; 508; 599; 666; 675; 685; 748; 785; 806; 831; 853; 945; 999; 1047; 1136; 1420; 1604; 1621; 1646; 2027; 2087; 2204; 2344; 2369	68	27
Mki67	17345	169234624	NP_001074586.2	antigen KI-67 [Mus musculus]	312	[K].EKVQPLEDHSVFQELFQTSR.[Y]	EkVQPLEDHSVFQELFQTSR	[K2](Biotin)	881.77	3	1668	1	QPQTPKEkVQPLEDH	169234624	0	0	1	0			881.77				3		0	0	1	0	0	0	100758	0	0	1	169; 289; 292; 351; 357; 508; 599; 666; 675; 685; 748; 785; 806; 831; 853; 945; 976; 999; 1034; 1047; 1050; 1057; 1113; 1136; 1261; 1377; 1420; 1438; 1464; 1604; 1621; 1646; 1668; 1696; 1732; 2027; 2087; 2204; 2344; 2369; 2662; 2995	104	42	289; 292; 351; 357; 508; 599; 666; 675; 685; 748; 785; 806; 831; 853; 945; 999; 1047; 1136; 1420; 1604; 1621; 1646; 2027; 2087; 2204; 2344; 2369	68	27
Mki67	17345	169234624	NP_001074586.2	antigen KI-67 [Mus musculus]	312	[R].HTLVETMNEKTEAVLAENTTAR.[H]	HTLVETMNEkTEAVLAENTTAR	[K10](Biotin)	895.439	3	831	1	LVETMNEkTEAVLAE	169234624	1	1	1	0	895.438	895.436	895.439		3	3	3		1	3	1	0	190937	267605	197315	0	4	1	169; 289; 292; 351; 357; 508; 599; 666; 675; 685; 748; 785; 806; 831; 853; 945; 976; 999; 1034; 1047; 1050; 1057; 1113; 1136; 1261; 1377; 1420; 1438; 1464; 1604; 1621; 1646; 1668; 1696; 1732; 2027; 2087; 2204; 2344; 2369; 2662; 2995	104	42	289; 292; 351; 357; 508; 599; 666; 675; 685; 748; 785; 806; 831; 853; 945; 999; 1047; 1136; 1420; 1604; 1621; 1646; 2027; 2087; 2204; 2344; 2369	68	27
Mki67	17345	169234624	NP_001074586.2	antigen KI-67 [Mus musculus]	312	[K].DGKVLLAQKLEPAIYVTR.[G]	DGKVLLAQKLEPAIYVTR	[K](Biotin)			X	2
Mki67	17345	169234624	NP_001074586.2	antigen KI-67 [Mus musculus]	312	[K].VSVPARPYKMLNNLMLNR.[K]	VSVPARPYkMLNNLMLNR	[K9](Biotin)	781.417	3	675	1	SVPARPYkMLNNLML	169234624	1	1	1	1	781.417	781.414	781.414	781.417	3	3	3	3	1	1	1	1	157931	113581	82697.3	364725	2	2	169; 289; 292; 351; 357; 508; 599; 666; 675; 685; 748; 785; 806; 831; 853; 945; 976; 999; 1034; 1047; 1050; 1057; 1113; 1136; 1261; 1377; 1420; 1438; 1464; 1604; 1621; 1646; 1668; 1696; 1732; 2027; 2087; 2204; 2344; 2369; 2662; 2995	104	42	289; 292; 351; 357; 508; 599; 666; 675; 685; 748; 785; 806; 831; 853; 945; 999; 1047; 1136; 1420; 1604; 1621; 1646; 2027; 2087; 2204; 2344; 2369	68	27
Mki67	17345	169234624	NP_001074586.2	antigen KI-67 [Mus musculus]	312	[K].AQPLEGPAGLKEHFETPNPK.[D]	AQPLEGPAGLkEHFETPNPK	[K11](Biotin)	796.068	3	976	1	LEGPAGLkEHFETPN	169234624	0	0	1	0			796.068				3		0	0	1	0	0	0	208780	0	0	1	169; 289; 292; 351; 357; 508; 599; 666; 675; 685; 748; 785; 806; 831; 853; 945; 976; 999; 1034; 1047; 1050; 1057; 1113; 1136; 1261; 1377; 1420; 1438; 1464; 1604; 1621; 1646; 1668; 1696; 1732; 2027; 2087; 2204; 2344; 2369; 2662; 2995	104	42	289; 292; 351; 357; 508; 599; 666; 675; 685; 748; 785; 806; 831; 853; 945; 999; 1047; 1136; 1420; 1604; 1621; 1646; 2027; 2087; 2204; 2344; 2369	68	27
Mki67	17345	169234624	NP_001074586.2	antigen KI-67 [Mus musculus]	312	[R].QLQVTNSGDIPEPITTEILGEKVLSSTR.[N]	QLQVTNSGDIPEPITTEILGEkVLSSTR	[K22](Biotin)	1084.57	4	748	1	TTEILGEkVLSSTRN	169234624	1	1	0	1	1084.57	813.676		813.677	3	4		4	2	2	0	3	250752	145858	0	1.06114e+06	4	3	169; 289; 292; 351; 357; 508; 599; 666; 675; 685; 748; 785; 806; 831; 853; 945; 976; 999; 1034; 1047; 1050; 1057; 1113; 1136; 1261; 1377; 1420; 1438; 1464; 1604; 1621; 1646; 1668; 1696; 1732; 2027; 2087; 2204; 2344; 2369; 2662; 2995	104	42	289; 292; 351; 357; 508; 599; 666; 675; 685; 748; 785; 806; 831; 853; 945; 999; 1047; 1136; 1420; 1604; 1621; 1646; 2027; 2087; 2204; 2344; 2369	68	27
Mki67	17345	169234624	NP_001074586.2	antigen KI-67 [Mus musculus]	312	[R].KMDVTEEISGLWKQSLGR.[V]	KMDVTEEISGLWkQSLGR	[K13](Biotin)	768.39	3	1621	2	EEISGLWkQSLGRVH	169234624	0	1	0	1		768.39		768.39		3		3	0	1	0	1	0	33064.2	0	178077	1	1	169; 289; 292; 351; 357; 508; 599; 666; 675; 685; 748; 785; 806; 831; 853; 945; 976; 999; 1034; 1047; 1050; 1057; 1113; 1136; 1261; 1377; 1420; 1438; 1464; 1604; 1621; 1646; 1668; 1696; 1732; 2027; 2087; 2204; 2344; 2369; 2662; 2995	104	42	289; 292; 351; 357; 508; 599; 666; 675; 685; 748; 785; 806; 831; 853; 945; 999; 1047; 1136; 1420; 1604; 1621; 1646; 2027; 2087; 2204; 2344; 2369	68	27
Mki67	17345	169234624	NP_001074586.2	antigen KI-67 [Mus musculus]	312	[R].KVDFSEDLSGLTEMFKTPVK.[E]	kVDFSEDLSGLTEMFKTPVK	[K1](Biotin)	833.084	3	685	2	NNLMLNRkVDFSEDL	169234624	0	1	0	1		833.084		833.083		3		3	0	1	0	1	0	28918.4	0	117421	1	1	169; 289; 292; 351; 357; 508; 599; 666; 675; 685; 748; 785; 806; 831; 853; 945; 976; 999; 1034; 1047; 1050; 1057; 1113; 1136; 1261; 1377; 1420; 1438; 1464; 1604; 1621; 1646; 1668; 1696; 1732; 2027; 2087; 2204; 2344; 2369; 2662; 2995	104	42	289; 292; 351; 357; 508; 599; 666; 675; 685; 748; 785; 806; 831; 853; 945; 999; 1047; 1136; 1420; 1604; 1621; 1646; 2027; 2087; 2204; 2344; 2369	68	27
Mki67	17345	169234624	NP_001074586.2	antigen KI-67 [Mus musculus]	312	[R].GTFREQKVDQQVQDNENAPQR.[C]	GTFREQkVDQQVQDNENAPQR	[K7](Biotin)	905.099	3	853	2	RGTFREQkVDQQVQD	169234624	1	0	1	1	905.095		905.095	905.099	3		3	3	1	0	1	1	0	0	0	0	1	2	169; 289; 292; 351; 357; 508; 599; 666; 675; 685; 748; 785; 806; 831; 853; 945; 976; 999; 1034; 1047; 1050; 1057; 1113; 1136; 1261; 1377; 1420; 1438; 1464; 1604; 1621; 1646; 1668; 1696; 1732; 2027; 2087; 2204; 2344; 2369; 2662; 2995	104	42	289; 292; 351; 357; 508; 599; 666; 675; 685; 748; 785; 806; 831; 853; 945; 999; 1047; 1136; 1420; 1604; 1621; 1646; 2027; 2087; 2204; 2344; 2369	68	27
Mki67	17345	169234624	NP_001074586.2	antigen KI-67 [Mus musculus]	312	[R].EKISPVSLPQCATGEVVHIPIGPEDDTENK.[G]	EkISPVSLPQCATGEVVHIPIGPEDDTENK	[K2](Biotin)	872.183	4	1732	1	GNIAVREkISPVSLP	169234624	0	0	1	0			872.183				4		0	0	1	0	0	0	0	0	0	1	169; 289; 292; 351; 357; 508; 599; 666; 675; 685; 748; 785; 806; 831; 853; 945; 976; 999; 1034; 1047; 1050; 1057; 1113; 1136; 1261; 1377; 1420; 1438; 1464; 1604; 1621; 1646; 1668; 1696; 1732; 2027; 2087; 2204; 2344; 2369; 2662; 2995	104	42	289; 292; 351; 357; 508; 599; 666; 675; 685; 748; 785; 806; 831; 853; 945; 999; 1047; 1136; 1420; 1604; 1621; 1646; 2027; 2087; 2204; 2344; 2369	68	27
Mki67	17345	169234624	NP_001074586.2	antigen KI-67 [Mus musculus]	312	[K].KMFFNSPQPESAITR.[K]	kMFFNSPQPESAITR	[K1](Biotin)	989.979	2	1464	1	LVVVKTKkMFFNSPQ	169234624	0	0	1	0			989.979				2		0	0	1	0	0	0	0	0	0	1	169; 289; 292; 351; 357; 508; 599; 666; 675; 685; 748; 785; 806; 831; 853; 945; 976; 999; 1034; 1047; 1050; 1057; 1113; 1136; 1261; 1377; 1420; 1438; 1464; 1604; 1621; 1646; 1668; 1696; 1732; 2027; 2087; 2204; 2344; 2369; 2662; 2995	104	42	289; 292; 351; 357; 508; 599; 666; 675; 685; 748; 785; 806; 831; 853; 945; 999; 1047; 1136; 1420; 1604; 1621; 1646; 2027; 2087; 2204; 2344; 2369	68	27
Mki67	17345	169234624	NP_001074586.2	antigen KI-67 [Mus musculus]	312	[K].KTPVSETEPLKTASSVSK.[L]	KTPVSETEPLkTASSVSK	[K11](Biotin)	705.706	3	806	2	VSETEPLkTASSVSK	169234624	1	1	1	1	705.706	705.704	705.705	705.704	3	3	3	3	1	1	1	1	0	0	0	0	2	2	169; 289; 292; 351; 357; 508; 599; 666; 675; 685; 748; 785; 806; 831; 853; 945; 976; 999; 1034; 1047; 1050; 1057; 1113; 1136; 1261; 1377; 1420; 1438; 1464; 1604; 1621; 1646; 1668; 1696; 1732; 2027; 2087; 2204; 2344; 2369; 2662; 2995	104	42	289; 292; 351; 357; 508; 599; 666; 675; 685; 748; 785; 806; 831; 853; 945; 999; 1047; 1136; 1420; 1604; 1621; 1646; 2027; 2087; 2204; 2344; 2369	68	27
Dhx9	13211	755493774	XP_011246220.1	ATP-dependent RNA helicase A isoform X1 [Mus musculus]	65	[R].GANLKDYYSR.[K]	GANLkDYYSR	[K5](Biotin)	706.836	2	149	1	WDRGANLkDYYSRKE	755493774	1	1	1	1	706.835	706.836	706.835	706.835	2	2	2	2	1	1	1	1	574883	474793	629731	401973	2	2	149	2	1	29; 149	3	2
Dhx9	13211	755493774	XP_011246220.1	ATP-dependent RNA helicase A isoform X1 [Mus musculus]	65	[R].AVGNKNR.[Q]	AVGNkNR	[K5](Biotin)	492.756	2	29	1	EIRAVGNkNRQKFMC	755493774	1	0	0	0	492.756				2				1	0	0	0	180831	0	0	0	1	0	149	2	1	29; 149	3	2
Ranbp2	19386	153792534	NP_035370.2	E3 SUMO-protein ligase RanBP2 [Mus musculus]	257	[R].SDDMFAFHGPGKSVFTTAASELANK.[S]	SDDMFAFHGPGkSVFTTAASELANK	[K12](Biotin)	957.445	3	1133	1	FAFHGPGkSVFTTAA	153792534	1	1	1	1	952.113	952.113	957.445	952.112	3	3	3	3	1	1	1	1	284671	204834	52671.4	308959	2	2	982; 996; 1133; 1448; 1721; 2018; 2303; 2351	18	8	5; 982; 996; 1133; 1448; 1721; 1993; 2018; 2303; 2351; 2430	27	11
Ranbp2	19386	153792534	NP_035370.2	E3 SUMO-protein ligase RanBP2 [Mus musculus]	257	[R].SAESKVIEFGK.[S]	SAESkVIEFGK	[K5](Biotin)	710.862	2	996	1	ASRSAESkVIEFGKS	153792534	1	0	1	1	710.862		710.862	710.861	2		2	2	1	0	1	1	1460072	0	990211	672460	1	2	982; 996; 1133; 1448; 1721; 2018; 2303; 2351	18	8	5; 982; 996; 1133; 1448; 1721; 1993; 2018; 2303; 2351; 2430	27	11
Ranbp2	19386	153792534	NP_035370.2	E3 SUMO-protein ligase RanBP2 [Mus musculus]	257	[K].AVVSPPKFVFGSESVK.[S]	AVVSPPkFVFGSESVK	[K7](Biotin)	635.339	3	2351	1	KAVVSPPkFVFGSES	153792534	1	1	1	1	635.338	635.339	635.339	635.339	3	3	3	3	1	1	1	1	167153	101001	103075	64139.3	2	2	982; 996; 1133; 1448; 1721; 2018; 2303; 2351	18	8	5; 982; 996; 1133; 1448; 1721; 1993; 2018; 2303; 2351; 2430	27	11
Ranbp2	19386	153792534	NP_035370.2	E3 SUMO-protein ligase RanBP2 [Mus musculus]	257	[K].SGLKDFKTFLTNDQVK.[V]	SGLKDFkTFLTNDQVK	[K7](Biotin)	689.692	3	2018	2	KSGLKDFkTFLTNDQ	153792534	1	1	1	1	689.692	689.691	689.691	689.691	3	3	3	3	1	1	1	1	441572	292760	273930	167397	2	2	982; 996; 1133; 1448; 1721; 2018; 2303; 2351	18	8	5; 982; 996; 1133; 1448; 1721; 1993; 2018; 2303; 2351; 2430	27	11
Ranbp2	19386	153792534	NP_035370.2	E3 SUMO-protein ligase RanBP2 [Mus musculus]	257	[R].GDDYFNYNVQQTSTNPPLPEPGYFTKPPLVAHASR.[S]	GDDYFNYNVQQTSTNPPLPEPGYFTkPPLVAHASR	[K26](Biotin)	1037.5	4	982	0	PEPGYFTkPPLVAHA	153792534	1	1	0	1	1037.49	1037.5		1037.5	4	4		4	1	1	0	1	476525	347727	0	366730	2	1	982; 996; 1133; 1448; 1721; 2018; 2303; 2351	18	8	5; 982; 996; 1133; 1448; 1721; 1993; 2018; 2303; 2351; 2430	27	11
Ranbp2	19386	153792534	NP_035370.2	E3 SUMO-protein ligase RanBP2 [Mus musculus]	257	[K].SASSFVQTSFKFGQGDLPK.[S]	SASSFVQTSFkFGQGDLPK	[K11](Biotin)	753.037	3	1448	1	SFVQTSFkFGQGDLP	153792534	1	1	1	0	753.037	753.037	753.037		3	3	3		1	1	1	0	291621	196425	83529.7	0	2	1	982; 996; 1133; 1448; 1721; 2018; 2303; 2351	18	8	5; 982; 996; 1133; 1448; 1721; 1993; 2018; 2303; 2351; 2430	27	11
Ranbp2	19386	153792534	NP_035370.2	E3 SUMO-protein ligase RanBP2 [Mus musculus]	257	[R].ESPCGKIAIAVLEETTR.[E]	ESPCGkIAIAVLEETTR	[K6](Biotin)	700.688	3	2303	1	PRESPCGkIAIAVLE	153792534	1	1	1	1	700.687	700.687	700.688	700.687	3	3	3	3	1	1	1	1	161016	92186.7	31530.7	82062.5	2	2	982; 996; 1133; 1448; 1721; 2018; 2303; 2351	18	8	5; 982; 996; 1133; 1448; 1721; 1993; 2018; 2303; 2351; 2430	27	11
Ranbp2	19386	153792534	NP_035370.2	E3 SUMO-protein ligase RanBP2 [Mus musculus]	257	[R].SDDMFAFHGPGKSVFTTAASELANK.[S]	SDDMFAFHGPGkSVFTTAASELANK	[K12](Biotin)	957.445	3	1133	1	FAFHGPGkSVFTTAA	153792534	1	1	1	1	952.113	952.113	957.445	952.112	3	3	3	3	1	1	1	1	284671	204834	52671.4	308959	2	2	982; 996; 1133; 1448; 1721; 2018; 2303; 2351	18	8	5; 982; 996; 1133; 1448; 1721; 1993; 2018; 2303; 2351; 2430	27	11
Ranbp2	19386	153792534	NP_035370.2	E3 SUMO-protein ligase RanBP2 [Mus musculus]	257	[K].SIKDGFSFCIPVSADGFK.[F]	SIkDGFSFCIPVSADGFK	[K3](Biotin)	734.353	3	1721	1	NTEFKSIkDGFSFCI	153792534	1	1	1	1	734.352	734.353	734.35	734.352	3	3	3	3	4	4	1	3	3.03322e+06	2.26519e+06	110270	3.71329e+06	8	4	982; 996; 1133; 1448; 1721; 2018; 2303; 2351	18	8	5; 982; 996; 1133; 1448; 1721; 1993; 2018; 2303; 2351; 2430	27	11
Ranbp2	19386	153792534	NP_035370.2	E3 SUMO-protein ligase RanBP2 [Mus musculus]	257	[R].LLLDIPLQTPHKLVDTGR.[A]	LLLDIPLQTPHkLVDTGR	[K12](Biotin)	752.425	3	1993	1	IPLQTPHkLVDTGRA	153792534	1	0	0	0	752.425				3				1	0	0	0	367397	0	0	0	1	0	982; 996; 1133; 1448; 1721; 2018; 2303; 2351	18	8	5; 982; 996; 1133; 1448; 1721; 1993; 2018; 2303; 2351; 2430	27	11
Ranbp2	19386	153792534	NP_035370.2	E3 SUMO-protein ligase RanBP2 [Mus musculus]	257	[R].SKADVER.[Y]	SkADVER	[K2](Biotin)	515.754	2	5	1	MRRSkADVERYI	153792534	0	1	0	0		515.754				2			0	1	0	0	0	144064	0	0	1	0	982; 996; 1133; 1448; 1721; 2018; 2303; 2351	18	8	5; 982; 996; 1133; 1448; 1721; 1993; 2018; 2303; 2351; 2430	27	11
Ranbp2	19386	153792534	NP_035370.2	E3 SUMO-protein ligase RanBP2 [Mus musculus]	257	[K].SHETDGGSAHGDEEDDGPHFEPVVPLPDKIEVK.[T]	SHETDGGSAHGDEEDDGPHFEPVVPLPDKIEVK	[K](Biotin)			X	1
Ranbp2	19386	153792534	NP_035370.2	E3 SUMO-protein ligase RanBP2 [Mus musculus]	257	[R].ESPCGKIAIAVLEETTRER.[T]	ESPCGkIAIAVLEETTRER	[K6](Biotin)	795.737	3	2303	2	PRESPCGkIAIAVLE	153792534	1	0	0	0	795.737				3				1	0	0	0	56805.9	0	0	0	1	0	982; 996; 1133; 1448; 1721; 2018; 2303; 2351	18	8	5; 982; 996; 1133; 1448; 1721; 1993; 2018; 2303; 2351; 2430	27	11
Ranbp2	19386	153792534	NP_035370.2	E3 SUMO-protein ligase RanBP2 [Mus musculus]	257	[K].QSSDGKVK.[N]	QSSDGkVK	[K6](Biotin)	537.767	2	2430	1	IKQSSDGkVKNLSAF	153792534	1	0	0	0	537.767				2				1	0	0	0	206851	0	0	0	1	0	982; 996; 1133; 1448; 1721; 2018; 2303; 2351	18	8	5; 982; 996; 1133; 1448; 1721; 1993; 2018; 2303; 2351; 2430	27	11
Hnrnpa1	15382	85060507	NP_001034218.1	heterogeneous nuclear ribonucleoprotein A1 isoform b [Mus musculus]	18	[R].SSGPYGGGGQYFAKPR.[N]	SSGPYGGGGQYFAkPR	[K14](Biotin)	618.959	3	351	0	GGGQYFAkPRNQGGY	85060507	1	1	1	1	618.957	618.959	618.958	618.959	3	3	3	3	1	1	1	1	326856	297235	420438	374023	2	2	351	2	1	351	2	1
Ncl	17975	84875537	NP_035010.3	nucleolin [Mus musculus]	90	[R].SQPSKTLFVK.[G]	SQPSkTLFVK	[K5](Biotin)	680.869	2	569	1	NSRSQPSkTLFVKGL	84875537	1	0	1	1	680.868		680.869	680.869	2		2	2	1	0	1	1	241962	0	571386	360406	1	2	3; 63; 71; 102; 116; 230; 478; 569	15	8	3; 63; 71; 102; 116; 230; 478; 569	13	8
Ncl	17975	84875537	NP_035010.3	nucleolin [Mus musculus]	90	[R].LVSQDGKSK.[G]	LVSQDGKSK	[K](Biotin)			X	1
Ncl	17975	84875537	NP_035010.3	nucleolin [Mus musculus]	90	[K].NITPAKVIPTPGK.[K]	NITPAkVIPTPGK	[K6](Biotin)	781.445	2	102	1	KKNITPAkVIPTPGK	84875537	1	0	1	0	781.443		781.445		2		2		1	0	1	0	232741	0	404277	0	1	1	3; 63; 71; 102; 116; 230; 478; 569	15	8	3; 63; 71; 102; 116; 230; 478; 569	13	8
Ncl	17975	84875537	NP_035010.3	nucleolin [Mus musculus]	90	[-].MVKLAK.[A]	MVkLAK	[K3](Biotin)	479.267	2	3	1	MVkLAKAGKT	84875537	1	0	1	0	479.267		479.267		2		2		1	0	1	0	291842	0	359327	0	1	1	3; 63; 71; 102; 116; 230; 478; 569	15	8	3; 63; 71; 102; 116; 230; 478; 569	13	8
Ncl	17975	84875537	NP_035010.3	nucleolin [Mus musculus]	90	[K].TPAKVVPMK.[A]	TPAkVVPMK	[K4](Biotin)	598.83	2	230	1	KGKKTPAkVVPMKAK	84875537	1	0	1	1	598.83		598.83	598.83	2		2	2	1	0	1	1	624597	0	865050	587696	1	2	3; 63; 71; 102; 116; 230; 478; 569	15	8	3; 63; 71; 102; 116; 230; 478; 569	13	8
Ncl	17975	84875537	NP_035010.3	nucleolin [Mus musculus]	90	[K].VVVSQTKK.[A]	VVVSQTKK	[K](Biotin)			X	1
Ncl	17975	84875537	NP_035010.3	nucleolin [Mus musculus]	90	[K].KVVVSQTK.[K]	kVVVSQTK	[K1](Biotin)	557.819	2	63	1	ATTTPAKkVVVSQTK	84875537	0	1	1	0		557.818	557.819			2	2		0	1	1	0	0	703104	1.25598e+06	0	1	1	3; 63; 71; 102; 116; 230; 478; 569	15	8	3; 63; 71; 102; 116; 230; 478; 569	13	8
Ncl	17975	84875537	NP_035010.3	nucleolin [Mus musculus]	90	[K].NITPAKVIPTPGKK.[G]	NITPAkVIPTPGKK	[K6](Biotin)	563.996	3	102	2	KKNITPAkVIPTPGK	84875537	1	1	1	1	563.996	563.996	563.995	563.996	3	3	3	3	1	1	1	1	1.86663e+06	1.31193e+06	2.21666e+06	1.48478e+06	2	2	3; 63; 71; 102; 116; 230; 478; 569	15	8	3; 63; 71; 102; 116; 230; 478; 569	13	8
Ncl	17975	84875537	NP_035010.3	nucleolin [Mus musculus]	90	[K].KAAVPTPAKK.[A]	kAAVPTPAKK	[K1](Biotin)	412.909	3	71	2	VVVSQTKkAAVPTPA	84875537	0	1	0	1		412.909		412.909		3		3	0	1	0	1	0	180165	0	194706	1	1	3; 63; 71; 102; 116; 230; 478; 569	15	8	3; 63; 71; 102; 116; 230; 478; 569	13	8
Ncl	17975	84875537	NP_035010.3	nucleolin [Mus musculus]	90	[K].KVVVSQTKK.[A]	KVVVSQTKK	[K](Biotin)			X	2
Ncl	17975	84875537	NP_035010.3	nucleolin [Mus musculus]	90	[K].GAAQAKALVPTPGKK.[G]	GAAQAkALVPTPGKK	[K6](Biotin)	554.984	3	116	2	KKGAAQAkALVPTPG	84875537	1	1	1	1	554.983	554.983	554.983	554.984	3	3	3	3	1	1	1	1	784452	604709	779796	590645	2	2	3; 63; 71; 102; 116; 230; 478; 569	15	8	3; 63; 71; 102; 116; 230; 478; 569	13	8
Ncl	17975	84875537	NP_035010.3	nucleolin [Mus musculus]	90	[R].TGKTSTWSGESK.[T]	TGkTSTWSGESK	[K3](Biotin)	747.852	2	478	1	QRQERTGkTSTWSGE	84875537	1	0	1	1	747.852		747.85	747.849	2		2	2	1	0	1	1	232500	0	470728	0	1	2	3; 63; 71; 102; 116; 230; 478; 569	15	8	3; 63; 71; 102; 116; 230; 478; 569	13	8
Ncl	17975	84875537	NP_035010.3	nucleolin [Mus musculus]	90	[K].KTPAKVVPMK.[A]	KTPAkVVPMK	[K5](Biotin)	442.254	3	230	2	KGKKTPAkVVPMKAK	84875537	1	1	0	1	442.254	442.254		442.254	3	3		3	1	1	0	1	690502	415794	0	688633	2	1	3; 63; 71; 102; 116; 230; 478; 569	15	8	3; 63; 71; 102; 116; 230; 478; 569	13	8
Ddx21	56200	72384374	NP_062426.2	nucleolar RNA helicase 2 [Mus musculus]	101	[K].ASSKDAIR.[L]	ASSkDAIR	[K4](Biotin)	537.275	2	649	1	EIIKASSkDAIRLLD	72384374	1	1	1	1	537.274	537.275	537.274	537.274	2	2	2	2	1	1	1	1	843870	601177	1306151	1.32839e+06	2	2	148; 649	3	2	649	2	1
Ddx21	56200	72384374	NP_062426.2	nucleolar RNA helicase 2 [Mus musculus]	101	[K].LKNGLSQPSEEEADIPKPK.[K]	LkNGLSQPSEEEADIPKPK	[K2](Biotin)	769.396	3	148	1	GEKSPKLkNGLSQPS	72384374	0	0	0	1				769.396				3	0	0	0	1	0	0	0	0	0	1	148; 649	3	2	649	2	1
Top2a	21973	568973595	XP_006533216.1	DNA topoisomerase 2-alpha isoform X1 [Mus musculus]	175	[K].TATKSQSSVSTAGTK.[K]	TATkSQSSVSTAGTK	[K4](Biotin)	840.42	2	1418	1	GVKKTATkSQSSVST	568973595	1	1	1	1	840.417	840.42	840.419	840.419	2	2	2	2	1	1	1	1	0	0	108712	61156.7	2	2	1272; 1279; 1319; 1418; 1450; 1480; 1488; 1513	16	8	1279; 1418; 1480; 1488	7	4
Top2a	21973	568973595	XP_006533216.1	DNA topoisomerase 2-alpha isoform X1 [Mus musculus]	175	[R].SAAAKAK.[F]	SAAAkAK	[K5](Biotin)	436.737	2	1319	1	EQRSAAAkAKFTVDL	568973595	0	0	1	1			436.736	436.737			2	2	0	0	1	1	0	0	1.27809e+06	32413.7	0	2	1272; 1279; 1319; 1418; 1450; 1480; 1488; 1513	16	8	1279; 1418; 1480; 1488	7	4
Top2a	21973	568973595	XP_006533216.1	DNA topoisomerase 2-alpha isoform X1 [Mus musculus]	175	[K].QTTLPFKPVKK.[G]	QTTLPFkPVKK	[K7](Biotin)	504.959	3	1279	1	KQTTLPFkPVKKGRK	568973595	1	0	1	1	504.958		504.959	504.959	3		3	3	1	0	1	1	103114	0	315949	111725	1	2	1272; 1279; 1319; 1418; 1450; 1480; 1488; 1513	16	8	1279; 1418; 1480; 1488	7	4
Top2a	21973	568973595	XP_006533216.1	DNA topoisomerase 2-alpha isoform X1 [Mus musculus]	175	[K].KQTTLPFKPVKK.[G]	kQTTLPFKPVKK	[K1](Biotin)	410.995	4	1272	2	KKEPGAKkQTTLPFK	568973595	0	0	1	1			410.994	410.995			4	4	0	0	1	1	0	0	351953	242259	0	2	1272; 1279; 1319; 1418; 1450; 1480; 1488; 1513	16	8	1279; 1418; 1480; 1488	7	4
Top2a	21973	568973595	XP_006533216.1	DNA topoisomerase 2-alpha isoform X1 [Mus musculus]	175	[R].KPIKYLEESDDDDDLF.[-]	kPIKYLEESDDDDDLF	[K1](Biotin)	1084.49	2	1513	1	AKSDRARkPIKYLEE	568973595	0	0	1	0			1084.49				2		0	0	1	0	0	0	363476	0	0	1	1272; 1279; 1319; 1418; 1450; 1480; 1488; 1513	16	8	1279; 1418; 1480; 1488	7	4
Top2a	21973	568973595	XP_006533216.1	DNA topoisomerase 2-alpha isoform X1 [Mus musculus]	175	[R].VSEKPAPAK.[A]	VSEkPAPAK	[K4](Biotin)	576.808	2	1450	0	LSARVSEkPAPAKAK	568973595	0	0	0	1				576.808				2	0	0	0	1	0	0	0	133936	0	1	1272; 1279; 1319; 1418; 1450; 1480; 1488; 1513	16	8	1279; 1418; 1480; 1488	7	4
Top2a	21973	568973595	XP_006533216.1	DNA topoisomerase 2-alpha isoform X1 [Mus musculus]	175	[K].KTATKSQSSVSTAGTK.[K]	KTATkSQSSVSTAGTK	[K5](Biotin)	603.313	3	1418	2	GVKKTATkSQSSVST	568973595	0	0	0	1				603.313				3	0	0	0	1	0	0	0	41466.6	0	1	1272; 1279; 1319; 1418; 1450; 1480; 1488; 1513	16	8	1279; 1418; 1480; 1488	7	4
Top2a	21973	568973595	XP_006533216.1	DNA topoisomerase 2-alpha isoform X1 [Mus musculus]	175	[K].AKGEEQDFPVDLEDTIAPR.[A]	AkGEEQDFPVDLEDTIAPR	[K2](Biotin)	786.043	3	1488	1	GATSKKAkGEEQDFP	568973595	1	0	1	0	786.043		786.042		3		3		1	0	2	0	45390.1	0	171682	0	1	2	1272; 1279; 1319; 1418; 1450; 1480; 1488; 1513	16	8	1279; 1418; 1480; 1488	7	4
Top2a	21973	568973595	XP_006533216.1	DNA topoisomerase 2-alpha isoform X1 [Mus musculus]	175	[R].AISKGATSKK.[A]	AISkGATSKK	[K4](Biotin)	406.229	3	1480	2	DFERAISkGATSKKA	568973595	1	1	1	1	406.229	406.229	406.229	406.229	3	3	3	3	2	1	2	1	683230	360520	1.10249e+06	109590	3	3	1272; 1279; 1319; 1418; 1450; 1480; 1488; 1513	16	8	1279; 1418; 1480; 1488	7	4
Tpm1	22003	256000780	NP_001157720.1	tropomyosin alpha-1 chain isoform Tpm1.1st [Mus musculus]	39	[R].AQKDEEKMEIQEIQLKEAK.[H]	AQKDEEKMEIQEIQLkEAK	[K16](Biotin)	629.321	4	149	3	EIQEIQLkEAKHIAE	256000780	1	0	0	1	629.321			629.321	4			4	1	0	0	1	189779	0	0	127564	1	1	149	1	1	149; 168	2	2
Tpm1	22003	256000780	NP_001157720.1	tropomyosin alpha-1 chain isoform Tpm1.1st [Mus musculus]	39	[R].KLVIIESDLERAEER.[A]	kLVIIESDLERAEER	[K1](Biotin)	676.028	3	168	2	KYEEVARkLVIIESD	256000780	1	0	0	0	676.028				3				1	0	0	0	67377.8	0	0	0	1	0	149	1	1	149; 168	2	2
Hnrnpm	76936	21313308	NP_084080.1	heterogeneous nuclear ribonucleoprotein M isoform a [Mus musculus]	40	[R].INEILSNALKR.[G]	INEILSNALkR	[K10](Biotin)	748.917	2	380	1	EILSNALkRGEIIAK	21313308	0	0	1	0			748.917				2		0	0	1	0	0	0	242837	0	0	1	380; 387	3	2	87; 387	3	2
Hnrnpm	76936	21313308	NP_084080.1	heterogeneous nuclear ribonucleoprotein M isoform a [Mus musculus]	40	[K].RGEIIAKQGGGGAGGSVPGIER.[M]	RGEIIAkQGGGGAGGSVPGIER	[K7](Biotin)	764.736	3	387	2	KRGEIIAkQGGGGAG	21313308	1	1	1	1	764.736	764.735	764.733	764.735	3	3	3	3	1	1	1	1	401269	313512	428825	460208	2	2	380; 387	3	2	87; 387	3	2
Hnrnpm	76936	21313308	NP_084080.1	heterogeneous nuclear ribonucleoprotein M isoform a [Mus musculus]	40	[K].WQSLKDLVK.[E]	WQSLkDLVK	[K5](Biotin)	671.863	2	87	1	DVKWQSLkDLVKEKV	21313308	1	0	0	0	671.863				2				1	0	0	0	72364.1	0	0	0	1	0	380; 387	3	2	87; 387	3	2
Tpx2	72119	568918482	XP_006500277.1	targeting protein for Xklp2 isoform X1 [Mus musculus]	97	[R].NKKDESLLPSKSVNK.[I]	NKKDESLLPSkSVNK	[K11](Biotin)	479.009	4	358	3	DESLLPSkSVNKIAR	568918482	0	0	0	1				479.009				4	0	0	0	2	0	0	0	249910	0	2	58; 65; 75; 233; 239; 258; 307; 358; 362; 375; 396; 420; 425; 485; 492; 506; 523; 564; 566; 598; 603; 625; 684; 708; 719; 726; 739	88	27	75; 239; 258; 375; 485; 492; 506; 523; 566; 684; 708; 726; 739	45	13
Tpx2	72119	568918482	XP_006500277.1	targeting protein for Xklp2 isoform X1 [Mus musculus]	97	[K].NVTQAEPFSLETDKR.[G]	NVTQAEPFSLETDkR	[K14](Biotin)	654.321	3	598	1	PFSLETDkRGAYKAE	568918482	0	0	1	0			654.321				3		0	0	1	0	0	0	736444	0	0	1	58; 65; 75; 233; 239; 258; 307; 358; 362; 375; 396; 420; 425; 485; 492; 506; 523; 564; 566; 598; 603; 625; 684; 708; 719; 726; 739	88	27	75; 239; 258; 375; 485; 492; 506; 523; 566; 684; 708; 726; 739	45	13
Tpx2	72119	568918482	XP_006500277.1	targeting protein for Xklp2 isoform X1 [Mus musculus]	97	[R].IFESGPILPKR.[A]	IFESGPILPkR	[K10](Biotin)	741.912	2	420	1	ESGPILPkRAPVKPP	568918482	0	0	1	0			741.912				2		0	0	1	0	0	0	122513	0	0	1	58; 65; 75; 233; 239; 258; 307; 358; 362; 375; 396; 420; 425; 485; 492; 506; 523; 564; 566; 598; 603; 625; 684; 708; 719; 726; 739	88	27	75; 239; 258; 375; 485; 492; 506; 523; 566; 684; 708; 726; 739	45	13
Tpx2	72119	568918482	XP_006500277.1	targeting protein for Xklp2 isoform X1 [Mus musculus]	97	[K].DAACFKARPNTVIFQEPFVPKK.[E]	DAACFkARPNTVIFQEPFVPKK	[K6](Biotin)	698.112	4	625	2	QKDAACFkARPNTVI	568918482	0	0	0	1				698.112				4	0	0	0	1	0	0	0	74501.5	0	1	58; 65; 75; 233; 239; 258; 307; 358; 362; 375; 396; 420; 425; 485; 492; 506; 523; 564; 566; 598; 603; 625; 684; 708; 719; 726; 739	88	27	75; 239; 258; 375; 485; 492; 506; 523; 566; 684; 708; 726; 739	45	13
Tpx2	72119	568918482	XP_006500277.1	targeting protein for Xklp2 isoform X1 [Mus musculus]	97	[R].GIGEPFQGKNSLRK.[A]	GIGEPFQGkNSLRK	[K9](Biotin)	586.311	3	58	2	IGEPFQGkNSLRKAK	568918482	0	0	1	0			586.311				3		0	0	1	0	0	0	393527	0	0	1	58; 65; 75; 233; 239; 258; 307; 358; 362; 375; 396; 420; 425; 485; 492; 506; 523; 564; 566; 598; 603; 625; 684; 708; 719; 726; 739	88	27	75; 239; 258; 375; 485; 492; 506; 523; 566; 684; 708; 726; 739	45	13
Tpx2	72119	568918482	XP_006500277.1	targeting protein for Xklp2 isoform X1 [Mus musculus]	97	[R].GAYKAEMWKHQLEEEQK.[Q]	GAYkAEMWKHQLEEEQK	[K4](Biotin)	583.528	4	603	2	TDKRGAYkAEMWKHQ	568918482	0	0	0	1				583.528				4	0	0	0	1	0	0	0	272681	0	1	58; 65; 75; 233; 239; 258; 307; 358; 362; 375; 396; 420; 425; 485; 492; 506; 523; 564; 566; 598; 603; 625; 684; 708; 719; 726; 739	88	27	75; 239; 258; 375; 485; 492; 506; 523; 566; 684; 708; 726; 739	45	13
Tpx2	72119	568918482	XP_006500277.1	targeting protein for Xklp2 isoform X1 [Mus musculus]	97	[K].EMQKGEVPKFK.[A]	EMQKGEVPkFK	[K9](Biotin)	516.263	3	564	2	MQKGEVPkFKALPVP	568918482	0	0	0	1				516.263				3	0	0	0	1	0	0	0	367455	0	1	58; 65; 75; 233; 239; 258; 307; 358; 362; 375; 396; 420; 425; 485; 492; 506; 523; 564; 566; 598; 603; 625; 684; 708; 719; 726; 739	88	27	75; 239; 258; 375; 485; 492; 506; 523; 566; 684; 708; 726; 739	45	13
Tpx2	72119	568918482	XP_006500277.1	targeting protein for Xklp2 isoform X1 [Mus musculus]	97	[K].MAEVEAWKLQQLEEVR.[Q]	MAEVEAWkLQQLEEVR	[K8](Biotin)	729.03	3	684	1	MAEVEAWkLQQLEEV	568918482	1	0	1	1	729.029		729.03	729.03	3		3	3	1	0	1	1	16608.2	0	19979.5	95839.8	1	2	58; 65; 75; 233; 239; 258; 307; 358; 362; 375; 396; 420; 425; 485; 492; 506; 523; 564; 566; 598; 603; 625; 684; 708; 719; 726; 739	88	27	75; 239; 258; 375; 485; 492; 506; 523; 566; 684; 708; 726; 739	45	13
Tpx2	72119	568918482	XP_006500277.1	targeting protein for Xklp2 isoform X1 [Mus musculus]	97	[K].SSELPLTVPVSPKFSTRFQ.[-]	SSELPLTVPVSPkFSTRFQ	[K13](Biotin)	782.747	3	739	2	LTVPVSPkFSTRFQ	568918482	1	0	0	0	782.747				3				1	0	0	0	46722.2	0	0	0	1	0	58; 65; 75; 233; 239; 258; 307; 358; 362; 375; 396; 420; 425; 485; 492; 506; 523; 564; 566; 598; 603; 625; 684; 708; 719; 726; 739	88	27	75; 239; 258; 375; 485; 492; 506; 523; 566; 684; 708; 726; 739	45	13
Tpx2	72119	568918482	XP_006500277.1	targeting protein for Xklp2 isoform X1 [Mus musculus]	97	[K].SVNKIARDPQTPILQTK.[Y]	SVNkIARDPQTPILQTK	[K4](Biotin)	712.393	3	362	2	LPSKSVNkIARDPQT	568918482	0	0	1	0			712.393				3		0	0	1	0	0	0	478644	0	0	1	58; 65; 75; 233; 239; 258; 307; 358; 362; 375; 396; 420; 425; 485; 492; 506; 523; 564; 566; 598; 603; 625; 684; 708; 719; 726; 739	88	27	75; 239; 258; 375; 485; 492; 506; 523; 566; 684; 708; 726; 739	45	13
Tpx2	72119	568918482	XP_006500277.1	targeting protein for Xklp2 isoform X1 [Mus musculus]	97	[R].GAYKAEMWKHQLEEEQKQQK.[D]	GAYKAEMWKHQLEEEQKQQK	[K](Biotin)			X	3
Tpx2	72119	568918482	XP_006500277.1	targeting protein for Xklp2 isoform X1 [Mus musculus]	97	[K].LQQGFVTPLKAVDNTYHK.[E]	LQQGFVTPLkAVDNTYHK	[K10](Biotin)	762.398	3	75	1	QGFVTPLkAVDNTYH	568918482	0	0	1	1			762.398	762.398			3	3	0	0	1	1	0	0	651411	364919	0	2	58; 65; 75; 233; 239; 258; 307; 358; 362; 375; 396; 420; 425; 485; 492; 506; 523; 564; 566; 598; 603; 625; 684; 708; 719; 726; 739	88	27	75; 239; 258; 375; 485; 492; 506; 523; 566; 684; 708; 726; 739	45	13
Tpx2	72119	568918482	XP_006500277.1	targeting protein for Xklp2 isoform X1 [Mus musculus]	97	[K].STAEQEAEELEKLQQYK.[F]	STAEQEAEELEkLQQYK	[K12](Biotin)	750.692	3	396	1	QEAEELEkLQQYKFK	568918482	0	0	1	0			750.692				3		0	0	1	0	0	0	276327	0	0	1	58; 65; 75; 233; 239; 258; 307; 358; 362; 375; 396; 420; 425; 485; 492; 506; 523; 564; 566; 598; 603; 625; 684; 708; 719; 726; 739	88	27	75; 239; 258; 375; 485; 492; 506; 523; 566; 684; 708; 726; 739	45	13
Tpx2	72119	568918482	XP_006500277.1	targeting protein for Xklp2 isoform X1 [Mus musculus]	97	[K].IARDPQTPILQTKYR.[T]	IARDPQTPILQTkYR	[K13](Biotin)	676.036	3	375	2	QTPILQTkYRTRAVT	568918482	1	1	1	1	676.034	676.034	676.036	676.035	3	3	3	3	1	1	1	1	337275	262263	1367834	849866	2	2	58; 65; 75; 233; 239; 258; 307; 358; 362; 375; 396; 420; 425; 485; 492; 506; 523; 564; 566; 598; 603; 625; 684; 708; 719; 726; 739	88	27	75; 239; 258; 375; 485; 492; 506; 523; 566; 684; 708; 726; 739	45	13
Tpx2	72119	568918482	XP_006500277.1	targeting protein for Xklp2 isoform X1 [Mus musculus]	97	[K].VIPATVPKSPVFALKNR.[I]	VIPATVPkSPVFALkNR	[K8; K15](Biotin)	763.76	3	485; 492	2	VIPATVPkSPVFALK; KSPVFALkNRIRVPI	568918482	2	2	2	2	763.759	763.758	763.759	763.76	3	3	3	3	1	1	1	1	161992	100005	459078	453765	2	2	58; 65; 75; 233; 239; 258; 307; 358; 362; 375; 396; 420; 425; 485; 492; 506; 523; 564; 566; 598; 603; 625; 684; 708; 719; 726; 739	88	27	75; 239; 258; 375; 485; 492; 506; 523; 566; 684; 708; 726; 739	45	13
Tpx2	72119	568918482	XP_006500277.1	targeting protein for Xklp2 isoform X1 [Mus musculus]	97	[K].SPVFALKNR.[I]	SPVFALkNR	[K7](Biotin)	629.343	3	492	1	KSPVFALkNRIRVPI	568918482	1	1	1	1	629.343	419.898	629.342	629.343	2	3	2	2	4	4	7	4	1.6253e+08	8.5753e+07	6.49648e+08	374421907	8	11	58; 65; 75; 233; 239; 258; 307; 358; 362; 375; 396; 420; 425; 485; 492; 506; 523; 564; 566; 598; 603; 625; 684; 708; 719; 726; 739	88	27	75; 239; 258; 375; 485; 492; 506; 523; 566; 684; 708; 726; 739	45	13
Tpx2	72119	568918482	XP_006500277.1	targeting protein for Xklp2 isoform X1 [Mus musculus]	97	[K].ALPVPHFDTINLPEKKVK.[N]	ALPVPHFDTINLPEKKVK	[K](Biotin)			X	2
Tpx2	72119	568918482	XP_006500277.1	targeting protein for Xklp2 isoform X1 [Mus musculus]	97	[K].KLALAGPGQPVKK.[S]	kLALAGPGQPVKK	[K1](Biotin)	511.637	3	239	2	RKNEEFKkLALAGPG	568918482	1	0	1	0	511.637		511.636		3		3		1	0	1	0	392219	0	1.26679e+06	0	1	1	58; 65; 75; 233; 239; 258; 307; 358; 362; 375; 396; 420; 425; 485; 492; 506; 523; 564; 566; 598; 603; 625; 684; 708; 719; 726; 739	88	27	75; 239; 258; 375; 485; 492; 506; 523; 566; 684; 708; 726; 739	45	13
Tpx2	72119	568918482	XP_006500277.1	targeting protein for Xklp2 isoform X1 [Mus musculus]	97	[K].AQPVPHYGVPYKPHIAEAR.[N]	AQPVPHYGVPYkPHIAEAR	[K12](Biotin)	786.073	4	523	0	PHYGVPYkPHIAEAR	568918482	1	1	1	1	589.806	589.806	786.073	589.806	4	4	3	4	1	1	2	1	1.39858e+06	1.1402e+06	5.10209e+06	3.36453e+06	2	3	58; 65; 75; 233; 239; 258; 307; 358; 362; 375; 396; 420; 425; 485; 492; 506; 523; 564; 566; 598; 603; 625; 684; 708; 719; 726; 739	88	27	75; 239; 258; 375; 485; 492; 506; 523; 566; 684; 708; 726; 739	45	13
Tpx2	72119	568918482	XP_006500277.1	targeting protein for Xklp2 isoform X1 [Mus musculus]	97	[R].IRVPIKDEEEEKPVVIK.[A]	IRVPIKDEEEEkPVVIK	[K12](Biotin)	749.753	4	506	2	IKDEEEEkPVVIKAQ	568918482	1	1	1	1	562.566	749.753	562.566	562.565	4	3	4	4	1	2	2	1	1384663	1.136e+06	4.78839e+06	3277124	3	3	58; 65; 75; 233; 239; 258; 307; 358; 362; 375; 396; 420; 425; 485; 492; 506; 523; 564; 566; 598; 603; 625; 684; 708; 719; 726; 739	88	27	75; 239; 258; 375; 485; 492; 506; 523; 566; 684; 708; 726; 739	45	13
Tpx2	72119	568918482	XP_006500277.1	targeting protein for Xklp2 isoform X1 [Mus musculus]	97	[R].KYAAVEVK.[S]	kYAAVEVK	[K1](Biotin)	567.305	2	719	1	HKANPIRkYAAVEVK	568918482	0	0	1	1			567.305	567.305			2	2	0	0	1	1	0	0	1.33984e+06	1.02967e+06	0	2	58; 65; 75; 233; 239; 258; 307; 358; 362; 375; 396; 420; 425; 485; 492; 506; 523; 564; 566; 598; 603; 625; 684; 708; 719; 726; 739	88	27	75; 239; 258; 375; 485; 492; 506; 523; 566; 684; 708; 726; 739	45	13
Tpx2	72119	568918482	XP_006500277.1	targeting protein for Xklp2 isoform X1 [Mus musculus]	97	[K].ILEDVVGVPEKK.[V]	ILEDVVGVPEKK	[K](Biotin)			X	1
Tpx2	72119	568918482	XP_006500277.1	targeting protein for Xklp2 isoform X1 [Mus musculus]	97	[K].AKLQQGFVTPLK.[A]	AkLQQGFVTPLK	[K2](Biotin)	778.438	2	65	1	KNSLRKAkLQQGFVT	568918482	0	0	1	0			778.438				2		0	0	1	0	0	0	368490	0	0	1	58; 65; 75; 233; 239; 258; 307; 358; 362; 375; 396; 420; 425; 485; 492; 506; 523; 564; 566; 598; 603; 625; 684; 708; 719; 726; 739	88	27	75; 239; 258; 375; 485; 492; 506; 523; 566; 684; 708; 726; 739	45	13
Tpx2	72119	568918482	XP_006500277.1	targeting protein for Xklp2 isoform X1 [Mus musculus]	97	[R].GCTIIKPFNLSK.[G]	GCTIIkPFNLSK	[K6](Biotin)	802.422	2	307	0	TRGCTIIkPFNLSKG	568918482	0	0	1	1			802.422	802.421			2	2	0	0	2	1	0	0	332472	109373	0	3	58; 65; 75; 233; 239; 258; 307; 358; 362; 375; 396; 420; 425; 485; 492; 506; 523; 564; 566; 598; 603; 625; 684; 708; 719; 726; 739	88	27	75; 239; 258; 375; 485; 492; 506; 523; 566; 684; 708; 726; 739	45	13
Tpx2	72119	568918482	XP_006500277.1	targeting protein for Xklp2 isoform X1 [Mus musculus]	97	[K].VIPATVPKSPVFALK.[N]	VIPATVPkSPVFALK	[K8](Biotin)	598.352	3	485	1	VIPATVPkSPVFALK	568918482	1	1	1	1	598.352	598.351	598.351	598.351	3	3	3	3	1	1	2	1	167975	105320	797822	0	2	3	58; 65; 75; 233; 239; 258; 307; 358; 362; 375; 396; 420; 425; 485; 492; 506; 523; 564; 566; 598; 603; 625; 684; 708; 719; 726; 739	88	27	75; 239; 258; 375; 485; 492; 506; 523; 566; 684; 708; 726; 739	45	13
Tpx2	72119	568918482	XP_006500277.1	targeting protein for Xklp2 isoform X1 [Mus musculus]	97	[K].KSTSQVTKTVDFHFLTDER.[I]	KSTSQVTkTVDFHFLTDER	[K8](Biotin)	617.06	4	258	2	KSTSQVTkTVDFHFL	568918482	1	1	1	1	617.059	617.06	617.06	617.059	4	4	4	4	1	1	1	1	231023	241870	533164	941447	2	2	58; 65; 75; 233; 239; 258; 307; 358; 362; 375; 396; 420; 425; 485; 492; 506; 523; 564; 566; 598; 603; 625; 684; 708; 719; 726; 739	88	27	75; 239; 258; 375; 485; 492; 506; 523; 566; 684; 708; 726; 739	45	13
Tpx2	72119	568918482	XP_006500277.1	targeting protein for Xklp2 isoform X1 [Mus musculus]	97	[K].STAEQEAEELEKLQQYKFK.[A]	STAEQEAEELEKLQQYKFK	[K](Biotin)			X	2
Tpx2	72119	568918482	XP_006500277.1	targeting protein for Xklp2 isoform X1 [Mus musculus]	97	[R].LRKELVHK.[A]	LRkELVHK	[K3](Biotin)	416.913	3	708	2	EELARLRkELVHKAN	568918482	1	1	1	1	416.913	416.913	416.913	416.913	3	3	3	3	2	2	2	2	3577028	2.50335e+06	8982187	6.79479e+06	4	4	58; 65; 75; 233; 239; 258; 307; 358; 362; 375; 396; 420; 425; 485; 492; 506; 523; 564; 566; 598; 603; 625; 684; 708; 719; 726; 739	88	27	75; 239; 258; 375; 485; 492; 506; 523; 566; 684; 708; 726; 739	45	13
Tpx2	72119	568918482	XP_006500277.1	targeting protein for Xklp2 isoform X1 [Mus musculus]	97	[R].KELVHK.[A]	kELVHK	[K1](Biotin)	490.273	3	708	1	EELARLRkELVHKAN	568918482	1	0	1	1	327.184		490.273	490.273	3		2	2	1	0	2	2	1.94065e+06	0	6.59042e+06	3.99455e+06	1	4	58; 65; 75; 233; 239; 258; 307; 358; 362; 375; 396; 420; 425; 485; 492; 506; 523; 564; 566; 598; 603; 625; 684; 708; 719; 726; 739	88	27	75; 239; 258; 375; 485; 492; 506; 523; 566; 684; 708; 726; 739	45	13
Tpx2	72119	568918482	XP_006500277.1	targeting protein for Xklp2 isoform X1 [Mus musculus]	97	[K].FKALPVPHFDTINLPEKK.[V]	FkALPVPHFDTINLPEKK	[K2](Biotin)	774.088	4	566	2	KGEVPKFkALPVPHF	568918482	1	1	1	1	580.819	580.818	774.088	580.817	4	4	3	4	1	1	2	1	189224	307220	667180	633446	2	3	58; 65; 75; 233; 239; 258; 307; 358; 362; 375; 396; 420; 425; 485; 492; 506; 523; 564; 566; 598; 603; 625; 684; 708; 719; 726; 739	88	27	75; 239; 258; 375; 485; 492; 506; 523; 566; 684; 708; 726; 739	45	13
Tpx2	72119	568918482	XP_006500277.1	targeting protein for Xklp2 isoform X1 [Mus musculus]	97	[K].LQQGFVTPLKAVDNTYHKETEKENLQK.[Q]	LQQGFVTPLkAVDNTYHKETEKENLQK	[K10](Biotin)	677.752	5	75	3	QGFVTPLkAVDNTYH	568918482	1	0	1	1	677.752		677.752	677.751	5		5	5	1	0	1	1	549792	0	1.562e+06	933401	1	2	58; 65; 75; 233; 239; 258; 307; 358; 362; 375; 396; 420; 425; 485; 492; 506; 523; 564; 566; 598; 603; 625; 684; 708; 719; 726; 739	88	27	75; 239; 258; 375; 485; 492; 506; 523; 566; 684; 708; 726; 739	45	13
Tpx2	72119	568918482	XP_006500277.1	targeting protein for Xklp2 isoform X1 [Mus musculus]	97	[K].SSELPLTVPVSPKFSTR.[F]	SSELPLTVPVSPkFSTR	[K13](Biotin)	1036.05	3	739	1	LTVPVSPkFSTRFQ	568918482	1	1	1	1	691.035	1036.05	691.035	691.036	3	2	3	3	2	2	3	3	929734	558607	4.20953e+06	1.35639e+06	4	6	58; 65; 75; 233; 239; 258; 307; 358; 362; 375; 396; 420; 425; 485; 492; 506; 523; 564; 566; 598; 603; 625; 684; 708; 719; 726; 739	88	27	75; 239; 258; 375; 485; 492; 506; 523; 566; 684; 708; 726; 739	45	13
Tpx2	72119	568918482	XP_006500277.1	targeting protein for Xklp2 isoform X1 [Mus musculus]	97	[K].VKNVTQAEPFSLETDKR.[G]	VKNVTQAEPFSLETDKR	[K](Biotin)			X	2
Tpx2	72119	568918482	XP_006500277.1	targeting protein for Xklp2 isoform X1 [Mus musculus]	97	[R].KNEEFKK.[L]	kNEEFKK	[K1](Biotin)	383.53	3	233	2	EVVELRRkNEEFKKL	568918482	0	0	0	1				383.53				3	0	0	0	1	0	0	0	173388	0	1	58; 65; 75; 233; 239; 258; 307; 358; 362; 375; 396; 420; 425; 485; 492; 506; 523; 564; 566; 598; 603; 625; 684; 708; 719; 726; 739	88	27	75; 239; 258; 375; 485; 492; 506; 523; 566; 684; 708; 726; 739	45	13
Tpx2	72119	568918482	XP_006500277.1	targeting protein for Xklp2 isoform X1 [Mus musculus]	97	[K].SPVFALK.[N]	SPVFALk	[K7](Biotin)	494.27	2	492	0	KSPVFALkNRIRVPI	568918482	1	1	1	1	494.27	494.27	494.27	494.27	2	2	2	2	1	1	1	2	1.37051e+06	585727	3.36523e+06	2.02888e+06	2	3	58; 65; 75; 233; 239; 258; 307; 358; 362; 375; 396; 420; 425; 485; 492; 506; 523; 564; 566; 598; 603; 625; 684; 708; 719; 726; 739	88	27	75; 239; 258; 375; 485; 492; 506; 523; 566; 684; 708; 726; 739	45	13
Tpx2	72119	568918482	XP_006500277.1	targeting protein for Xklp2 isoform X1 [Mus musculus]	97	[K].STSQVTKTVDFHFLTDER.[I]	STSQVTkTVDFHFLTDER	[K7](Biotin)	779.712	3	258	1	KSTSQVTkTVDFHFL	568918482	1	1	1	1	779.712	779.711	779.711	779.712	3	3	3	3	2	2	4	5	9.05643e+06	11540913	2.28857e+07	3.35539e+07	4	9	58; 65; 75; 233; 239; 258; 307; 358; 362; 375; 396; 420; 425; 485; 492; 506; 523; 564; 566; 598; 603; 625; 684; 708; 719; 726; 739	88	27	75; 239; 258; 375; 485; 492; 506; 523; 566; 684; 708; 726; 739	45	13
Tpx2	72119	568918482	XP_006500277.1	targeting protein for Xklp2 isoform X1 [Mus musculus]	97	[K].RAPVKPPTQPVGFDLEIEKR.[I]	RAPVkPPTQPVGFDLEIEKR	[K5](Biotin)	626.593	4	425	2	LPKRAPVkPPTQPVG	568918482	0	0	0	1				626.593				4	0	0	0	1	0	0	0	1.03105e+06	0	1	58; 65; 75; 233; 239; 258; 307; 358; 362; 375; 396; 420; 425; 485; 492; 506; 523; 564; 566; 598; 603; 625; 684; 708; 719; 726; 739	88	27	75; 239; 258; 375; 485; 492; 506; 523; 566; 684; 708; 726; 739	45	13
Tpx2	72119	568918482	XP_006500277.1	targeting protein for Xklp2 isoform X1 [Mus musculus]	97	[K].YAAVEVKSSELPLTVPVSPK.[F]	YAAVEVkSSELPLTVPVSPK	[K7](Biotin)	780.758	3	726	1	KYAAVEVkSSELPLT	568918482	1	0	1	1	780.755		780.757	780.758	3		3	3	1	0	1	1	102131	0	128352	205664	1	2	58; 65; 75; 233; 239; 258; 307; 358; 362; 375; 396; 420; 425; 485; 492; 506; 523; 564; 566; 598; 603; 625; 684; 708; 719; 726; 739	88	27	75; 239; 258; 375; 485; 492; 506; 523; 566; 684; 708; 726; 739	45	13
Tpx2	72119	568918482	XP_006500277.1	targeting protein for Xklp2 isoform X1 [Mus musculus]	97	[R].RKNEEFKK.[L]	RkNEEFKK	[K2](Biotin)	435.564	3	233	3	EVVELRRkNEEFKKL	568918482	0	0	1	0			435.564				3		0	0	1	0	0	0	1395795	0	0	1	58; 65; 75; 233; 239; 258; 307; 358; 362; 375; 396; 420; 425; 485; 492; 506; 523; 564; 566; 598; 603; 625; 684; 708; 719; 726; 739	88	27	75; 239; 258; 375; 485; 492; 506; 523; 566; 684; 708; 726; 739	45	13
Tpx2	72119	568918482	XP_006500277.1	targeting protein for Xklp2 isoform X1 [Mus musculus]	97	[K].STSQVTKTVDFHFLTDERIK.[Q]	STSQVTkTVDFHFLTDERIK	[K7](Biotin)	645.331	4	258	2	KSTSQVTkTVDFHFL	568918482	1	1	1	1	645.331	645.33	645.329	645.329	4	4	4	4	1	1	1	1	268426	210582	131393	345412	2	2	58; 65; 75; 233; 239; 258; 307; 358; 362; 375; 396; 420; 425; 485; 492; 506; 523; 564; 566; 598; 603; 625; 684; 708; 719; 726; 739	88	27	75; 239; 258; 375; 485; 492; 506; 523; 566; 684; 708; 726; 739	45	13
Tpx2	72119	568918482	XP_006500277.1	targeting protein for Xklp2 isoform X1 [Mus musculus]	97	[R].GAYKAEMWK.[H]	GAYkAEMWK	[K4](Biotin)	655.306	2	603	1	TDKRGAYkAEMWKHQ	568918482	0	0	0	1				655.306				2	0	0	0	1	0	0	0	0	0	1	58; 65; 75; 233; 239; 258; 307; 358; 362; 375; 396; 420; 425; 485; 492; 506; 523; 564; 566; 598; 603; 625; 684; 708; 719; 726; 739	88	27	75; 239; 258; 375; 485; 492; 506; 523; 566; 684; 708; 726; 739	45	13
Tpx2	72119	568918482	XP_006500277.1	targeting protein for Xklp2 isoform X1 [Mus musculus]	97	[K].AKLQQGFVTPLKAVDNTYHK.[E]	AKLQQGFVTPLkAVDNTYHK	[K12](Biotin)	621.832	4	75	2	QGFVTPLkAVDNTYH	568918482	0	0	1	1			621.832	621.832			4	4	0	0	1	1	0	0	0	0	0	2	58; 65; 75; 233; 239; 258; 307; 358; 362; 375; 396; 420; 425; 485; 492; 506; 523; 564; 566; 598; 603; 625; 684; 708; 719; 726; 739	88	27	75; 239; 258; 375; 485; 492; 506; 523; 566; 684; 708; 726; 739	45	13
Lmnb1	16906	188219589	NP_034851.2	lamin-B1 [Mus musculus]	38	[R].LYKEELEQTYHAKLENAR.[L]	LYKEELEQTYHAkLENAR	[K13](Biotin)	616.061	4	272	2	LEQTYHAkLENARLS	188219589	1	1	1	1	616.06	616.06	616.061	616.06	4	4	4	4	1	1	1	1	391465	280992	615195	503293	2	2	272	2	1	272	2	1
Npm1	18148	356582426	NP_001239190.1	nucleophosmin isoform 3 [Mus musculus]	29	[K].GPSSVEDIKAK.[M]	GPSSVEDIKAK	[K](Biotin)			X	1
Npm1	18148	356582426	NP_001239190.1	nucleophosmin isoform 3 [Mus musculus]	29	[K].AKMQASIEKAH.[-]	AkMQASIEKAH	[K2](Biotin)	480.576	3	248	2	SVEDIKAkMQASIEK	356582426	1	1	1	0	480.576	480.576	480.576		3	3	3		1	1	1	0	539655	358827	603593	0	2	1	27; 201; 211; 221; 248; 255	10	6	201; 211; 221; 248; 255	12	5
Npm1	18148	356582426	NP_001239190.1	nucleophosmin isoform 3 [Mus musculus]	29	[K].MQASIEKAH.[-]	MQASIEkAH	[K7](Biotin)	620.794	2	255	1	KMQASIEkAH	356582426	1	1	1	1	620.794	620.794	620.794	620.794	2	2	2	2	1	1	1	1	445570	276589	465713	323993	2	2	27; 201; 211; 221; 248; 255	10	6	201; 211; 221; 248; 255	12	5
Npm1	18148	356582426	NP_001239190.1	nucleophosmin isoform 3 [Mus musculus]	29	[R].SKGQESFK.[K]	SkGQESFK	[K2](Biotin)	568.774	2	221	1	KPSTPRSkGQESFKK	356582426	1	1	1	1	568.774	568.774	568.774	568.774	2	2	2	2	1	1	1	1	693351	579505	747807	541128	2	2	27; 201; 211; 221; 248; 255	10	6	201; 211; 221; 248; 255	12	5
Npm1	18148	356582426	NP_001239190.1	nucleophosmin isoform 3 [Mus musculus]	29	[K].TPKGPSSVEDIKAK.[M]	TPKGPSSVEDIKAK	[K](Biotin)			X	2
Npm1	18148	356582426	NP_001239190.1	nucleophosmin isoform 3 [Mus musculus]	29	[R].DTPAKNAQK.[S]	DTPAkNAQK	[K5](Biotin)	599.798	2	201	1	SVRDTPAkNAQKSNQ	356582426	1	1	0	1	599.796	599.798		599.798	2	2		2	1	1	0	1	512288	326750	0	314553	2	1	27; 201; 211; 221; 248; 255	10	6	201; 211; 221; 248; 255	12	5
Npm1	18148	356582426	NP_001239190.1	nucleophosmin isoform 3 [Mus musculus]	29	[K].RSAPGGGNKVPQKK.[V]	RSAPGGGNKVPQKK	[K](Biotin)			X	3
Npm1	18148	356582426	NP_001239190.1	nucleophosmin isoform 3 [Mus musculus]	29	[K].SNQNGKDLKPSTPR.[S]	SNQNGkDLKPSTPR	[K6](Biotin)	589.966	3	211	1	QKSNQNGkDLKPSTP	356582426	1	1	1	1	589.965	589.965	589.966	589.965	3	3	3	3	1	1	1	1	1.46332e+06	806834	1.16644e+06	780875	2	2	27; 201; 211; 221; 248; 255	10	6	201; 211; 221; 248; 255	12	5
Npm1	18148	356582426	NP_001239190.1	nucleophosmin isoform 3 [Mus musculus]	29	[R].SAPGGGNKVPQKK.[V]	SAPGGGNKVPQKK	[K](Biotin)			X	2
Npm1	18148	356582426	NP_001239190.1	nucleophosmin isoform 3 [Mus musculus]	29	[R].SKGQESFKK.[Q]	SKGQESFKK	[K](Biotin)			X	2
Npm1	18148	356582426	NP_001239190.1	nucleophosmin isoform 3 [Mus musculus]	29	[R].SKGQESFKKQEK.[T]	SkGQESFKKQEK	[K2](Biotin)	413.213	4	221	3	KPSTPRSkGQESFKK	356582426	0	1	0	1		413.213		413.213		4		4	0	1	0	1	0	241685	0	174466	1	1	27; 201; 211; 221; 248; 255	10	6	201; 211; 221; 248; 255	12	5
Npm1	18148	356582426	NP_001239190.1	nucleophosmin isoform 3 [Mus musculus]	29	[K].ADKDYHFKVDNDENEHQLSLR.[T]	ADkDYHFKVDNDENEHQLSLR	[K3](Biotin)	560.661	5	27	2	GCELKADkDYHFKVD	356582426	0	0	1	0			560.661				5		0	0	1	0	0	0	0	0	0	1	27; 201; 211; 221; 248; 255	10	6	201; 211; 221; 248; 255	12	5
Npm1	18148	356582426	NP_001239190.1	nucleophosmin isoform 3 [Mus musculus]	29	[K].SVRDTPAKNAQK.[S]	SVRDTPAkNAQK	[K8](Biotin)	514.268	3	201	2	SVRDTPAkNAQKSNQ	356582426	0	1	0	0		514.268				3			0	1	0	0	0	0	0	0	1	0	27; 201; 211; 221; 248; 255	10	6	201; 211; 221; 248; 255	12	5
Hist1h4k	319160	30061359	NP_835583.1	histone H4 [Mus musculus]	11	[K].GLGKGGAK.[R]	GLGkGGAK	[K4](Biotin)	457.25	2	13	1	KGGKGLGkGGAKRHR	30061359	1	1	1	1	457.25	457.25	457.25	457.25	2	2	2	2	1	1	1	1	18648158	13882318	33001484	27374010	2	2	9; 13; 21; 92	16	4	9; 13; 21; 92	20	4
Hist1h4k	319160	30061359	NP_835583.1	histone H4 [Mus musculus]	11	[K].GGKGLGK.[G]	GGkGLGK	[K3](Biotin)	421.732	2	9	1	SGRGKGGkGLGKGGA	30061359	1	1	1	1	421.732	421.731	421.731	421.731	2	2	2	2	3	2	2	1	5.7739e+07	41805060	100103616	20100036	5	3	9; 13; 21; 92	16	4	9; 13; 21; 92	20	4
Hist1h4k	319160	30061359	NP_835583.1	histone H4 [Mus musculus]	11	[K].GLGKGGAKR.[H]	GLGkGGAKR	[K4](Biotin)	535.301	3	13	2	KGGKGLGkGGAKRHR	30061359	1	1	1	1	357.202	535.301	535.3	535.301	3	2	2	2	4	4	4	3	192553517	1.35696e+08	281587847	71777236	8	7	9; 13; 21; 92	16	4	9; 13; 21; 92	20	4
Hist1h4k	319160	30061359	NP_835583.1	histone H4 [Mus musculus]	11	[R].KVLRDNIQGITKPAIR.[R]	kVLRDNIQGITKPAIR	[K1](Biotin)	512.801	4	21	2	GGAKRHRkVLRDNIQ	30061359	1	1	1	1	512.801	512.8	512.801	512.8	4	4	4	4	1	1	1	1	506214	318426	398047	381759	2	2	9; 13; 21; 92	16	4	9; 13; 21; 92	20	4
Hist1h4k	319160	30061359	NP_835583.1	histone H4 [Mus musculus]	11	[R].GKGGKGLGK.[G]	GKGGKGLGK	[K](Biotin)			X	2
Hist1h4k	319160	30061359	NP_835583.1	histone H4 [Mus musculus]	11	[K].TVTAMDVVYALKR.[Q]	TVTAMDVVYALkR	[K12](Biotin)	564.967	3	92	1	MDVVYALkRQGRTLY	30061359	1	1	1	1	564.964	564.963	564.967	564.966	3	3	3	3	2	1	1	1	98329.6	66805.2	26922.5	73716.3	3	2	9; 13; 21; 92	16	4	9; 13; 21; 92	20	4
Hist1h4k	319160	30061359	NP_835583.1	histone H4 [Mus musculus]	11	[K].GGKGLGKGGAK.[R]	GGKGLGKGGAK	[K](Biotin)			X	2
Ddx5	13207	568971472	XP_006532198.1	probable ATP-dependent RNA helicase DDX5 isoform X1 [Mus musculus]	34	[R].GYSNLLKR.[D]	GYSNLLkR	[K7](Biotin)	588.814	2	523	1	RGYSNLLkRDFGAKT	568971472	0	0	0	1				588.814				2	0	0	0	1	0	0	0	129341	0	1	470; 523	8	2	470	7	1
Ddx5	13207	568971472	XP_006532198.1	probable ATP-dependent RNA helicase DDX5 isoform X1 [Mus musculus]	34	[R].EANQAINPKLLQLVEDR.[G]	EANQAINPkLLQLVEDR	[K9](Biotin)	1089.07	3	470	1	ANQAINPkLLQLVED	568971472	1	1	1	1	726.384	726.385	726.385	1089.07	3	3	3	2	3	2	3	2	3.3865e+06	1.31912e+06	3.72638e+06	1.7196e+06	5	5	470; 523	8	2	470	7	1
Ddx5	13207	568971472	XP_006532198.1	probable ATP-dependent RNA helicase DDX5 isoform X1 [Mus musculus]	34	[R].EANQAINPKLLQLVEDRGSGR.[S]	EANQAINPkLLQLVEDRGSGR	[K9](Biotin)	845.444	3	470	2	ANQAINPkLLQLVED	568971472	1	1	1	1	845.444	845.443	845.444	845.441	3	3	3	3	1	1	1	1	500395	195001	285641	321552	2	2	470; 523	8	2	470	7	1
Tpm1	22003	256000784	NP_001157722.1	tropomyosin alpha-1 chain isoform Tpm1.7cy [Mus musculus]	36	[R].AQKDEEKMEIQEIQLKEAK.[H]	AQKDEEKMEIQEIQLkEAK	[K16](Biotin)	629.321	4	149	3	EIQEIQLkEAKHIAE	256000784	1	0	0	1	629.321			629.321	4			4	1	0	0	1	189779	0	0	127564	1	1	149	1	1	149; 168	2	2
Tpm1	22003	256000784	NP_001157722.1	tropomyosin alpha-1 chain isoform Tpm1.7cy [Mus musculus]	36	[R].KLVIIESDLERAEER.[A]	kLVIIESDLERAEER	[K1](Biotin)	676.028	3	168	2	KYEEVARkLVIIESD	256000784	1	0	0	0	676.028				3				1	0	0	0	67377.8	0	0	0	1	0	149	1	1	149; 168	2	2
Nono	53610	357394934	NP_001239447.1	non-POU domain-containing octamer-binding protein [Mus musculus]	27	[K].LVIKNQQFHK.[E]	LVIkNQQFHK	[K4](Biotin)	494.275	3	245	1	LPEKLVIkNQQFHKE	357394934	1	1	1	1	494.275	494.274	494.274	494.275	3	3	3	3	1	1	1	1	617043	449848	884126	676626	2	2	5; 200; 245; 251; 373; 469	18	6	5; 111; 200; 245; 251; 373; 469	22	7
Nono	53610	357394934	NP_001239447.1	non-POU domain-containing octamer-binding protein [Mus musculus]	27	[K].GIVEFSGKPAAR.[K]	GIVEFSGkPAAR	[K8](Biotin)	729.383	2	200	0	GIVEFSGkPAARKAL	357394934	1	0	1	0	729.383		729.382		2		2		1	0	1	0	287190	0	341056	0	1	1	5; 200; 245; 251; 373; 469	18	6	5; 111; 200; 245; 251; 373; 469	22	7
Nono	53610	357394934	NP_001239447.1	non-POU domain-containing octamer-binding protein [Mus musculus]	27	[K].NQQFHKER.[E]	NQQFHkER	[K6](Biotin)	438.212	3	251	1	IKNQQFHkEREQPPR	357394934	1	1	1	1	438.212	438.212	438.212	438.212	3	3	3	3	1	1	1	1	325175	313428	478652	379057	2	2	5; 200; 245; 251; 373; 469	18	6	5; 111; 200; 245; 251; 373; 469	22	7
Nono	53610	357394934	NP_001239447.1	non-POU domain-containing octamer-binding protein [Mus musculus]	27	[R].QQEGFKGTFPDAR.[E]	QQEGFkGTFPDAR	[K6](Biotin)	853.902	3	373	1	RRQQEGFkGTFPDAR	357394934	1	1	1	1	569.604	853.902	569.603	569.604	3	2	3	3	2	2	2	1	1.13662e+06	968559	1413104	559445	4	3	5; 200; 245; 251; 373; 469	18	6	5; 111; 200; 245; 251; 373; 469	22	7
Nono	53610	357394934	NP_001239447.1	non-POU domain-containing octamer-binding protein [Mus musculus]	27	[R].RQQEGFKGTFPDAR.[E]	RQQEGFkGTFPDAR	[K7](Biotin)	621.638	3	373	2	RRQQEGFkGTFPDAR	357394934	1	1	1	1	621.638	621.637	621.636	621.637	3	3	3	3	1	1	1	1	3953366	2959135	4.18378e+06	3.50209e+06	2	2	5; 200; 245; 251; 373; 469	18	6	5; 111; 200; 245; 251; 373; 469	22	7
Nono	53610	357394934	NP_001239447.1	non-POU domain-containing octamer-binding protein [Mus musculus]	27	[-].MQSNKAFNLEK.[Q]	MQSNkAFNLEK	[K5](Biotin)	789.377	2	5	1	MQSNkAFNLEKQ	357394934	1	1	1	1	789.376	789.377	789.376	789.377	2	2	2	2	1	1	1	1	3769386	2147816	3.52631e+06	1.93753e+06	2	2	5; 200; 245; 251; 373; 469	18	6	5; 111; 200; 245; 251; 373; 469	22	7
Nono	53610	357394934	NP_001239447.1	non-POU domain-containing octamer-binding protein [Mus musculus]	27	[K].AGEVFIHKDKGFGFIR.[L]	AGEVFIHKDkGFGFIR	[K10](Biotin)	512.52	4	111	2	EVFIHKDkGFGFIRL	357394934	1	0	0	0	512.52				4				1	0	0	0	145833	0	0	0	1	0	5; 200; 245; 251; 373; 469	18	6	5; 111; 200; 245; 251; 373; 469	22	7
Nono	53610	357394934	NP_001239447.1	non-POU domain-containing octamer-binding protein [Mus musculus]	27	[R].FGQAATMEGIGAIGGTPPAFNRPAPGAEFAPNKR.[R]	FGQAATMEGIGAIGGTPPAFNRPAPGAEFAPNkR	[K33](Biotin)	906.953	4	469	1	GAEFAPNkRRRY	357394934	1	1	1	1	906.953	906.952	906.951	906.952	4	4	4	4	2	1	1	1	319653	243392	297424	199902	3	2	5; 200; 245; 251; 373; 469	18	6	5; 111; 200; 245; 251; 373; 469	22	7
Nono	53610	357394934	NP_001239447.1	non-POU domain-containing octamer-binding protein [Mus musculus]	27	[-].MQSNKAFNLEKQNHTPR.[K]	MQSNkAFNLEKQNHTPR	[K5](Biotin)	771.041	3	5	2	MQSNkAFNLEKQ	357394934	1	1	1	0	771.04	771.039	771.041		3	3	3		1	1	1	0	911360	414623	476080	0	2	1	5; 200; 245; 251; 373; 469	18	6	5; 111; 200; 245; 251; 373; 469	22	7
Nono	53610	357394934	NP_001239447.1	non-POU domain-containing octamer-binding protein [Mus musculus]	27	[R].QQEGFKGTFPDAREQEIR.[M]	QQEGFkGTFPDAREQEIR	[K6](Biotin)	788.046	3	373	2	RRQQEGFkGTFPDAR	357394934	0	0	1	0			788.046				3		0	0	1	0	0	0	205028	0	0	1	5; 200; 245; 251; 373; 469	18	6	5; 111; 200; 245; 251; 373; 469	22	7
Nono	53610	357394934	NP_001239447.1	non-POU domain-containing octamer-binding protein [Mus musculus]	27	[R].RQQEGFKGTFPDAREQEIR.[M]	RQQEGFkGTFPDAREQEIR	[K7](Biotin)	630.313	4	373	3	RRQQEGFkGTFPDAR	357394934	1	1	1	0	630.312	630.312	630.313		4	4	4		1	1	1	0	1.2371e+06	595231	579209	0	2	1	5; 200; 245; 251; 373; 469	18	6	5; 111; 200; 245; 251; 373; 469	22	7
Nono	53610	357394934	NP_001239447.1	non-POU domain-containing octamer-binding protein [Mus musculus]	27	[K].NQQFHKEREQPPR.[F]	NQQFHkEREQPPR	[K6](Biotin)	480.738	4	251	2	IKNQQFHkEREQPPR	357394934	0	1	0	1		480.737		480.738		4		4	0	1	0	1	0	66153.9	0	87153.5	1	1	5; 200; 245; 251; 373; 469	18	6	5; 111; 200; 245; 251; 373; 469	22	7
Sfpq	71514	23956214	NP_076092.1	splicing factor, proline- and glutamine-rich [Mus musculus]	33	[R].GREEYEGPNKKPR.[F]	GREEYEGPNKKPR	[K](Biotin)			X	2
Sfpq	71514	23956214	NP_076092.1	splicing factor, proline- and glutamine-rich [Mus musculus]	33	[K].GGKMPGGPKPGGGPGMGAPGGHPKPPHR.[G]	GGkMPGGPKPGGGPGMGAPGGHPKPPHR	[K3](Biotin)	560.081	5	203	1	PGGPKGGkMPGGPKP	23956214	1	0	0	0	560.081				5				1	0	0	0	120143	0	0	0	1	0				203	1	1
Sfpq	71514	23956214	NP_076092.1	splicing factor, proline- and glutamine-rich [Mus musculus]	33	[R].GREEYEGPNKKPRF.[-]	GREEYEGPNKKPRF	[K](Biotin)			X	3
Acin1	56215	146231985	NP_075679.2	apoptotic chromatin condensation inducer in the nucleus isoform 2 [Mus musculus]	94	[R].KISVVSATKGVQAGNSDTEGGQPGRK.[R]	KISVVSATkGVQAGNSDTEGGQPGRK	[K9](Biotin)	700.115	4	831	3	ISVVSATkGVQAGNS	146231985	1	1	1	1	700.113	700.113	700.112	700.115	4	4	4	4	1	1	1	1	446659	305310	278316	342212	2	2	103; 831; 985	6	3	103; 831; 985	9	3
Acin1	56215	146231985	NP_075679.2	apoptotic chromatin condensation inducer in the nucleus isoform 2 [Mus musculus]	94	[R].LKGALMLENLQK.[H]	LkGALMLENLQK	[K2](Biotin)	792.437	2	103	1	SALVKRLkGALMLEN	146231985	1	1	0	1	792.437	792.436		792.437	2	2		2	1	1	0	1	263744	135739	0	117570	2	1	103; 831; 985	6	3	103; 831; 985	9	3
Acin1	56215	146231985	NP_075679.2	apoptotic chromatin condensation inducer in the nucleus isoform 2 [Mus musculus]	94	[R].RSISQQKSGVSITIDDPVR.[T]	RSISQQkSGVSITIDDPVR	[K7](Biotin)	771.407	3	985	2	RRSISQQkSGVSITI	146231985	0	1	0	0		771.407				3			0	1	0	0	0	231055	0	0	1	0	103; 831; 985	6	3	103; 831; 985	9	3
Acin1	56215	146231985	NP_075679.2	apoptotic chromatin condensation inducer in the nucleus isoform 2 [Mus musculus]	94	[R].SISQQKSGVSITIDDPVR.[T]	SISQQkSGVSITIDDPVR	[K6](Biotin)	719.373	3	985	1	RRSISQQkSGVSITI	146231985	1	1	0	1	719.372	719.373		719.373	3	3		3	1	1	0	1	552017	426332	0	323410	2	1	103; 831; 985	6	3	103; 831; 985	9	3
Acin1	56215	146231985	NP_075679.2	apoptotic chromatin condensation inducer in the nucleus isoform 2 [Mus musculus]	94	[R].KISVVSATKGVQAGNSDTEGGQPGR.[K]	KISVVSATkGVQAGNSDTEGGQPGR	[K9](Biotin)	890.451	3	831	2	ISVVSATkGVQAGNS	146231985	1	1	1	1	890.451	890.449	890.451	890.45	3	3	3	3	1	1	1	1	574344	385198	0	0	2	2	103; 831; 985	6	3	103; 831; 985	9	3
Tmpo	21917	121949765	NP_001073598.1	lamina-associated polypeptide 2 isoform epsilon [Mus musculus]	36	[K].LEKREPLKGR.[A]	LEKREPLkGR	[K8](Biotin)	484.61	3	202	3	LEKREPLkGRAKTPV	121949765	0	0	0	1				484.61				3	0	0	0	1	0	0	0	202221	0	1	202; 206; 212; 259; 285; 302; 322; 333; 345; 367; 388; 392	43	12	206; 212; 285; 302; 322; 333; 345; 367; 388; 392	33	10
Tmpo	21917	121949765	NP_001073598.1	lamina-associated polypeptide 2 isoform epsilon [Mus musculus]	36	[R].MEESFSSKYVPK.[Y]	MEESFSSkYVPK	[K8](Biotin)	837.382	3	388	1	MEESFSSkYVPKYAP	121949765	1	1	1	1	558.59	553.259	837.382	829.386	3	3	2	2	2	1	3	2	809296	929167	6.69091e+06	7.54551e+06	3	5	202; 206; 212; 259; 285; 302; 322; 333; 345; 367; 388; 392	43	12	206; 212; 285; 302; 322; 333; 345; 367; 388; 392	33	10
Tmpo	21917	121949765	NP_001073598.1	lamina-associated polypeptide 2 isoform epsilon [Mus musculus]	36	[R].IDGAVISESTPIAETIKASSNESLVANR.[L]	IDGAVISESTPIAETIkASSNESLVANR	[K17](Biotin)	1033.53	4	285	1	TPIAETIkASSNESL	121949765	1	1	1	1	775.395	1033.53	775.395	1033.52	4	3	4	3	2	2	2	2	82414.3	84381.5	60235.3	1.1688e+06	4	4	202; 206; 212; 259; 285; 302; 322; 333; 345; 367; 388; 392	43	12	206; 212; 285; 302; 322; 333; 345; 367; 388; 392	33	10
Tmpo	21917	121949765	NP_001073598.1	lamina-associated polypeptide 2 isoform epsilon [Mus musculus]	36	[K].TPVTLKQR.[R]	TPVTLkQR	[K6](Biotin)	584.829	2	212	1	AKTPVTLkQRRTEHN	121949765	0	0	1	0			584.829				2		0	0	1	0	0	0	621249	0	0	1	202; 206; 212; 259; 285; 302; 322; 333; 345; 367; 388; 392	43	12	206; 212; 285; 302; 322; 333; 345; 367; 388; 392	33	10
Tmpo	21917	121949765	NP_001073598.1	lamina-associated polypeptide 2 isoform epsilon [Mus musculus]	36	[R].AKTPVTLK.[Q]	AkTPVTLK	[K2](Biotin)	542.315	2	206	1	EPLKGRAkTPVTLKQ	121949765	1	0	1	1	542.315		542.315	542.315	2		2	2	1	0	1	1	1265839	0	2.76293e+06	2.57918e+06	1	2	202; 206; 212; 259; 285; 302; 322; 333; 345; 367; 388; 392	43	12	206; 212; 285; 302; 322; 333; 345; 367; 388; 392	33	10
Tmpo	21917	121949765	NP_001073598.1	lamina-associated polypeptide 2 isoform epsilon [Mus musculus]	36	[R].AEVGEKTEER.[R]	AEVGEkTEER	[K6](Biotin)	687.327	2	333	1	TRAEVGEkTEERRVD	121949765	0	1	1	1		687.322	687.327	687.326		2	2	2	0	2	1	1	0	769827	1.55274e+06	1.32354e+06	2	2	202; 206; 212; 259; 285; 302; 322; 333; 345; 367; 388; 392	43	12	206; 212; 285; 302; 322; 333; 345; 367; 388; 392	33	10
Tmpo	21917	121949765	NP_001073598.1	lamina-associated polypeptide 2 isoform epsilon [Mus musculus]	36	[R].AKTPVTLKQR.[R]	AKTPVTLkQR	[K8](Biotin)	456.603	3	212	2	AKTPVTLkQRRTEHN	121949765	1	1	1	1	456.603	456.602	456.599	456.602	3	3	3	3	1	1	1	1	2.95729e+06	1.69866e+06	6298085	5105902	2	2	202; 206; 212; 259; 285; 302; 322; 333; 345; 367; 388; 392	43	12	206; 212; 285; 302; 322; 333; 345; 367; 388; 392	33	10
Tmpo	21917	121949765	NP_001073598.1	lamina-associated polypeptide 2 isoform epsilon [Mus musculus]	36	[R].MEESFSSKYVPK.[Y]	MEESFSSkYVPK	[K8](Biotin)	837.382	3	388	1	MEESFSSkYVPKYAP	121949765	1	1	1	1	558.59	553.259	837.382	829.386	3	3	2	2	2	1	3	2	809296	929167	6.69091e+06	7.54551e+06	3	5	202; 206; 212; 259; 285; 302; 322; 333; 345; 367; 388; 392	43	12	206; 212; 285; 302; 322; 333; 345; 367; 388; 392	33	10
Tmpo	21917	121949765	NP_001073598.1	lamina-associated polypeptide 2 isoform epsilon [Mus musculus]	36	[R].RPIKGAAGRPLELSDFR.[M]	RPIkGAAGRPLELSDFR	[K4](Biotin)	528.041	4	367	1	ASCRRPIkGAAGRPL	121949765	1	1	1	1	528.04	528.04	528.04	528.041	4	4	4	4	1	1	1	1	158972	129839	341235	330887	2	2	202; 206; 212; 259; 285; 302; 322; 333; 345; 367; 388; 392	43	12	206; 212; 285; 302; 322; 333; 345; 367; 388; 392	33	10
Tmpo	21917	121949765	NP_001073598.1	lamina-associated polypeptide 2 isoform epsilon [Mus musculus]	36	[R].TPKKPLTR.[A]	TPkKPLTR	[K3](Biotin)	389.562	3	322	1	DITRRTPkKPLTRAE	121949765	0	0	0	1				389.562				3	0	0	0	1	0	0	0	487015	0	1	202; 206; 212; 259; 285; 302; 322; 333; 345; 367; 388; 392	43	12	206; 212; 285; 302; 322; 333; 345; 367; 388; 392	33	10
Tmpo	21917	121949765	NP_001073598.1	lamina-associated polypeptide 2 isoform epsilon [Mus musculus]	36	[R].KRVETSQHFR.[I]	kRVETSQHFR	[K1](Biotin)	379.198	4	259	2	GSRRTPRkRVETSQH	121949765	0	0	1	1			379.198	379.198			4	4	0	0	1	1	0	0	240980	164269	0	2	202; 206; 212; 259; 285; 302; 322; 333; 345; 367; 388; 392	43	12	206; 212; 285; 302; 322; 333; 345; 367; 388; 392	33	10
Tmpo	21917	121949765	NP_001073598.1	lamina-associated polypeptide 2 isoform epsilon [Mus musculus]	36	[K].YVPKYAPLADVK.[S]	YVPkYAPLADVK	[K4](Biotin)	795.425	2	392	1	FSSKYVPkYAPLADV	121949765	1	1	1	0	795.425	795.424	795.425		2	2	2		1	1	1	0	565637	430403	1.11088e+06	0	2	1	202; 206; 212; 259; 285; 302; 322; 333; 345; 367; 388; 392	43	12	206; 212; 285; 302; 322; 333; 345; 367; 388; 392	33	10
Tmpo	21917	121949765	NP_001073598.1	lamina-associated polypeptide 2 isoform epsilon [Mus musculus]	36	[R].RTPKKPLTR.[A]	RTPkKPLTR	[K4](Biotin)	441.596	3	322	2	DITRRTPkKPLTRAE	121949765	1	1	1	1	441.596	441.595	441.596	441.596	3	3	3	3	2	2	2	2	873631	466707	1.54284e+06	997154	4	4	202; 206; 212; 259; 285; 302; 322; 333; 345; 367; 388; 392	43	12	206; 212; 285; 302; 322; 333; 345; 367; 388; 392	33	10
Tmpo	21917	121949765	NP_001073598.1	lamina-associated polypeptide 2 isoform epsilon [Mus musculus]	36	[R].DILKEMFPYEASTPTGISASCR.[R]	DILkEMFPYEASTPTGISASCR	[K4](Biotin)	900.423	3	345	1	RVDRDILkEMFPYEA	121949765	1	0	1	0	900.423		900.421		3		3		1	0	1	0	43988.7	0	57246.1	0	1	1	202; 206; 212; 259; 285; 302; 322; 333; 345; 367; 388; 392	43	12	206; 212; 285; 302; 322; 333; 345; 367; 388; 392	33	10
Tmpo	21917	121949765	NP_001073598.1	lamina-associated polypeptide 2 isoform epsilon [Mus musculus]	36	[R].RVDRDILKEMFPYEASTPTGISASCR.[R]	RVDRDILkEMFPYEASTPTGISASCR	[K8](Biotin)	807.144	4	345	3	RVDRDILkEMFPYEA	121949765	1	1	1	1	807.143	807.142	807.144	807.144	4	4	4	4	1	1	1	1	185185	98751.2	135975	280964	2	2	202; 206; 212; 259; 285; 302; 322; 333; 345; 367; 388; 392	43	12	206; 212; 285; 302; 322; 333; 345; 367; 388; 392	33	10
Tmpo	21917	121949765	NP_001073598.1	lamina-associated polypeptide 2 isoform epsilon [Mus musculus]	36	[R].LTGNFKHASSILPITEFSDITR.[R]	LTGNFkHASSILPITEFSDITR	[K6](Biotin)	891.797	3	302	1	NRLTGNFkHASSILP	121949765	1	1	1	1	891.796	891.797	891.797	891.797	3	3	3	3	2	3	1	3	6.88022e+06	3.70859e+06	1.34689e+06	1.0926e+07	5	4	202; 206; 212; 259; 285; 302; 322; 333; 345; 367; 388; 392	43	12	206; 212; 285; 302; 322; 333; 345; 367; 388; 392	33	10
Tmpo	21917	121949765	NP_001073598.1	lamina-associated polypeptide 2 isoform epsilon [Mus musculus]	36	[R].LTGNFKHASSILPITEFSDITRR.[T]	LTGNFkHASSILPITEFSDITRR	[K6](Biotin)	708.126	4	302	2	NRLTGNFkHASSILP	121949765	1	1	1	1	708.124	708.126	708.124	708.125	4	4	4	4	1	1	1	2	1.5061e+06	1.10913e+06	597276	5662781	2	3	202; 206; 212; 259; 285; 302; 322; 333; 345; 367; 388; 392	43	12	206; 212; 285; 302; 322; 333; 345; 367; 388; 392	33	10
Tmpo	21917	121949765	NP_001073598.1	lamina-associated polypeptide 2 isoform epsilon [Mus musculus]	36	[K].YVPKYAPLADVKSEK.[T]	YVPkYAPLADVKSEK	[K4](Biotin)	645.342	3	392	2	FSSKYVPkYAPLADV	121949765	0	0	1	0			645.342				3		0	0	1	0	0	0	0	0	0	1	202; 206; 212; 259; 285; 302; 322; 333; 345; 367; 388; 392	43	12	206; 212; 285; 302; 322; 333; 345; 367; 388; 392	33	10
Sf3b1	81898	153791358	NP_112456.2	splicing factor 3B subunit 1 [Mus musculus]	84	[K].IAKTHEDIEAQIR.[E]	IAkTHEDIEAQIR	[K3](Biotin)	583.97	3	6	1	MAKIAkTHEDIEA	153791358	0	1	0	1		583.97		583.969		3		3	0	1	0	1	0	326004	0	381850	1	1	6; 141; 182	4	3	6; 141; 182	6	3
Sf3b1	81898	153791358	NP_112456.2	splicing factor 3B subunit 1 [Mus musculus]	84	[R].TMIISPERLDPFADGGKTPDPK.[M]	TMIISPERLDPFADGGkTPDPK	[K17](Biotin)	871.103	3	141	2	DPFADGGkTPDPKMN	153791358	1	1	1	1	871.102	871.103	871.1	871.101	3	3	3	3	1	1	1	1	294055	224856	221940	143854	2	2	6; 141; 182	4	3	6; 141; 182	6	3
Sf3b1	81898	153791358	NP_112456.2	splicing factor 3B subunit 1 [Mus musculus]	84	[K].AGELKVVNGAAASQPPSKR.[K]	AGELkVVNGAAASQPPSKR	[K5](Biotin)	702.71	3	182	2	KAKAGELkVVNGAAA	153791358	1	1	1	0	702.71	702.709	702.708		3	3	3		1	2	1	0	361986	415862	0	0	3	1	6; 141; 182	4	3	6; 141; 182	6	3
Nono	53610	569010350	XP_006528201.1	non-POU domain-containing octamer-binding protein isoform X1 [Mus musculus]	27	[K].LVIKNQQFHK.[E]	LVIkNQQFHK	[K4](Biotin)	494.275	3	245	1	LPEKLVIkNQQFHKE	569010350	1	1	1	1	494.275	494.274	494.274	494.275	3	3	3	3	1	1	1	1	617043	449848	884126	676626	2	2	5; 200; 245; 251; 373; 478	13	6	5; 111; 200; 245; 251; 373; 478	17	7
Nono	53610	569010350	XP_006528201.1	non-POU domain-containing octamer-binding protein isoform X1 [Mus musculus]	27	[K].GIVEFSGKPAAR.[K]	GIVEFSGkPAAR	[K8](Biotin)	729.383	2	200	0	GIVEFSGkPAARKAL	569010350	1	0	1	0	729.383		729.382		2		2		1	0	1	0	287190	0	341056	0	1	1	5; 200; 245; 251; 373; 478	13	6	5; 111; 200; 245; 251; 373; 478	17	7
Nono	53610	569010350	XP_006528201.1	non-POU domain-containing octamer-binding protein isoform X1 [Mus musculus]	27	[K].NQQFHKER.[E]	NQQFHkER	[K6](Biotin)	438.212	3	251	1	IKNQQFHkEREQPPR	569010350	1	1	1	1	438.212	438.212	438.212	438.212	3	3	3	3	1	1	1	1	325175	313428	478652	379057	2	2	5; 200; 245; 251; 373; 478	13	6	5; 111; 200; 245; 251; 373; 478	17	7
Nono	53610	569010350	XP_006528201.1	non-POU domain-containing octamer-binding protein isoform X1 [Mus musculus]	27	[R].QQEGFKGTFPDAVYLPCAYDVR.[E]	QQEGFkGTFPDAVYLPCAYDVR	[K6](Biotin)	929.772	3	373	1	RRQQEGFkGTFPDAV	569010350	1	1	1	0	929.768	929.772	929.768		3	3	3		1	1	1	0	73596.5	62816.4	42650.5	0	2	1	5; 200; 245; 251; 373; 478	13	6	5; 111; 200; 245; 251; 373; 478	17	7
Nono	53610	569010350	XP_006528201.1	non-POU domain-containing octamer-binding protein isoform X1 [Mus musculus]	27	[-].MQSNKAFNLEK.[Q]	MQSNkAFNLEK	[K5](Biotin)	789.377	2	5	1	MQSNkAFNLEKQ	569010350	1	1	1	1	789.376	789.377	789.376	789.377	2	2	2	2	1	1	1	1	3769386	2147816	3.52631e+06	1.93753e+06	2	2	5; 200; 245; 251; 373; 478	13	6	5; 111; 200; 245; 251; 373; 478	17	7
Nono	53610	569010350	XP_006528201.1	non-POU domain-containing octamer-binding protein isoform X1 [Mus musculus]	27	[K].AGEVFIHKDKGFGFIR.[L]	AGEVFIHKDkGFGFIR	[K10](Biotin)	512.52	4	111	2	EVFIHKDkGFGFIRL	569010350	1	0	0	0	512.52				4				1	0	0	0	145833	0	0	0	1	0	5; 200; 245; 251; 373; 478	13	6	5; 111; 200; 245; 251; 373; 478	17	7
Nono	53610	569010350	XP_006528201.1	non-POU domain-containing octamer-binding protein isoform X1 [Mus musculus]	27	[R].FGQAATMEGIGAIGGTPPAFNRPAPGAEFAPNKR.[R]	FGQAATMEGIGAIGGTPPAFNRPAPGAEFAPNkR	[K33](Biotin)	906.953	4	478	1	GAEFAPNkRRRY	569010350	1	1	1	1	906.953	906.952	906.951	906.952	4	4	4	4	2	1	1	1	319653	243392	297424	199902	3	2	5; 200; 245; 251; 373; 478	13	6	5; 111; 200; 245; 251; 373; 478	17	7
Nono	53610	569010350	XP_006528201.1	non-POU domain-containing octamer-binding protein isoform X1 [Mus musculus]	27	[R].RQQEGFKGTFPDAVYLPCAYDVR.[E]	RQQEGFkGTFPDAVYLPCAYDVR	[K7](Biotin)	981.805	3	373	2	RRQQEGFkGTFPDAV	569010350	0	1	1	0		981.805	981.802			3	3		0	1	1	0	0	126110	109401	0	1	1	5; 200; 245; 251; 373; 478	13	6	5; 111; 200; 245; 251; 373; 478	17	7
Nono	53610	569010350	XP_006528201.1	non-POU domain-containing octamer-binding protein isoform X1 [Mus musculus]	27	[-].MQSNKAFNLEKQNHTPR.[K]	MQSNkAFNLEKQNHTPR	[K5](Biotin)	771.041	3	5	2	MQSNkAFNLEKQ	569010350	1	1	1	0	771.04	771.039	771.041		3	3	3		1	1	1	0	911360	414623	476080	0	2	1	5; 200; 245; 251; 373; 478	13	6	5; 111; 200; 245; 251; 373; 478	17	7
Nono	53610	569010350	XP_006528201.1	non-POU domain-containing octamer-binding protein isoform X1 [Mus musculus]	27	[K].NQQFHKEREQPPR.[F]	NQQFHkEREQPPR	[K6](Biotin)	480.738	4	251	2	IKNQQFHkEREQPPR	569010350	0	1	0	1		480.737		480.738		4		4	0	1	0	1	0	66153.9	0	87153.5	1	1	5; 200; 245; 251; 373; 478	13	6	5; 111; 200; 245; 251; 373; 478	17	7
Acin1	56215	568988260	XP_006519359.1	apoptotic chromatin condensation inducer in the nucleus isoform X3 [Mus musculus]	94	[R].LKGALMLENLQK.[H]	LkGALMLENLQK	[K2](Biotin)	792.437	2	103	1	SALVKRLkGALMLEN	568988260	1	1	0	1	792.437	792.436		792.437	2	2		2	1	1	0	1	263744	135739	0	117570	2	1	103; 984	2	2	103; 830; 984	7	3
Acin1	56215	568988260	XP_006519359.1	apoptotic chromatin condensation inducer in the nucleus isoform X3 [Mus musculus]	94	[R].RSISQQKSGVSITIDDPVR.[T]	RSISQQkSGVSITIDDPVR	[K7](Biotin)	771.407	3	984	2	RRSISQQkSGVSITI	568988260	0	1	0	0		771.407				3			0	1	0	0	0	231055	0	0	1	0	103; 984	2	2	103; 830; 984	7	3
Acin1	56215	568988260	XP_006519359.1	apoptotic chromatin condensation inducer in the nucleus isoform X3 [Mus musculus]	94	[R].SISQQKSGVSITIDDPVR.[T]	SISQQkSGVSITIDDPVR	[K6](Biotin)	719.373	3	984	1	RRSISQQkSGVSITI	568988260	1	1	0	1	719.372	719.373		719.373	3	3		3	1	1	0	1	552017	426332	0	323410	2	1	103; 984	2	2	103; 830; 984	7	3
Acin1	56215	568988260	XP_006519359.1	apoptotic chromatin condensation inducer in the nucleus isoform X3 [Mus musculus]	94	[R].KISVVSTKGVQAGNSDTEGGQPGR.[K]	KISVVSTkGVQAGNSDTEGGQPGR	[K8](Biotin)	866.768	3	830	2	KISVVSTkGVQAGNS	568988260	1	1	0	0	866.768	866.765			3	3			1	1	0	0	285196	209406	0	0	2	0	103; 984	2	2	103; 830; 984	7	3
Smarca5	93762	40254124	NP_444354.2	SWI/SNF-related matrix-associated actin-dependent regulator of chromatin subfamily A member 5 [Mus musculus]	94	[R].LVDQNLNKIGKDEMLQMIR.[H]	LVDQNLNKIGkDEMLQMIR	[K11](Biotin)	828.764	3	646	2	QNLNKIGkDEMLQMI	40254124	1	0	0	0	828.764				3				1	0	0	0	47242.6	0	0	0	1	0	646; 723	11	2	120; 646; 723	15	3
Smarca5	93762	40254124	NP_444354.2	SWI/SNF-related matrix-associated actin-dependent regulator of chromatin subfamily A member 5 [Mus musculus]	94	[K].TPTSPLKMKPGRPR.[V]	TPTSPLKMKPGRPR	[K](Biotin)			X	1
Smarca5	93762	40254124	NP_444354.2	SWI/SNF-related matrix-associated actin-dependent regulator of chromatin subfamily A member 5 [Mus musculus]	94	[R].VKKDEKQNLLSVGDYR.[H]	VKKDEKQNLLSVGDYR	[K](Biotin)			X	3
Smarca5	93762	40254124	NP_444354.2	SWI/SNF-related matrix-associated actin-dependent regulator of chromatin subfamily A member 5 [Mus musculus]	94	[K].MKPGRPR.[V]	MkPGRPR	[K2](Biotin)	356.525	3	120	0	PTSPLKMkPGRPRVK	40254124	1	0	0	0	356.525				3				1	0	0	0	1222266	0	0	0	1	0	646; 723	11	2	120; 646; 723	15	3
Smarca5	93762	40254124	NP_444354.2	SWI/SNF-related matrix-associated actin-dependent regulator of chromatin subfamily A member 5 [Mus musculus]	94	[K].IGKDEMLQMIR.[H]	IGkDEMLQMIR	[K3](Biotin)	780.392	2	646	1	QNLNKIGkDEMLQMI	40254124	1	1	1	0	780.391	780.392	780.391		2	2	2		1	1	1	0	59747.9	30963.4	69102.1	0	2	1	646; 723	11	2	120; 646; 723	15	3
Smarca5	93762	40254124	NP_444354.2	SWI/SNF-related matrix-associated actin-dependent regulator of chromatin subfamily A member 5 [Mus musculus]	94	[K].QKIAFTEWIEPPKR.[E]	QkIAFTEWIEPPKR	[K2](Biotin)	657.018	3	723	2	EDYREKQkIAFTEWI	40254124	1	1	1	1	657.017	657.017	657.017	657.018	3	3	3	3	3	2	3	4	19405317	7.6719e+06	16885062	2.30124e+07	5	7	646; 723	11	2	120; 646; 723	15	3
Smarca5	93762	40254124	NP_444354.2	SWI/SNF-related matrix-associated actin-dependent regulator of chromatin subfamily A member 5 [Mus musculus]	94	[K].QKIAFTEWIEPPKRER.[K]	QkIAFTEWIEPPKRER	[K2](Biotin)	564.301	4	723	3	EDYREKQkIAFTEWI	40254124	1	1	1	1	564.301	564.301	564.301	564.3	4	4	4	4	5	1	1	2	1.99747e+06	538964	707320	780192	6	3	646; 723	11	2	120; 646; 723	15	3
Smarca5	93762	40254124	NP_444354.2	SWI/SNF-related matrix-associated actin-dependent regulator of chromatin subfamily A member 5 [Mus musculus]	94	[R].NFTMDTESSVYNFEGEDYREKQK.[I]	NFTMDTESSVYNFEGEDYREKQK	[K](Biotin)			X	2
Sfpq	71514	568929767	XP_006503469.1	splicing factor, proline- and glutamine-rich isoform X1 [Mus musculus]	34	[K].GGKMPGGPKPGGGPGMGAPGGHPKPPHR.[G]	GGkMPGGPKPGGGPGMGAPGGHPKPPHR	[K3](Biotin)	560.081	5	292	1	PGGPKGGkMPGGPKP	568929767	1	0	0	0	560.081				5				1	0	0	0	120143	0	0	0	1	0				292	1	1
Tpm1	22003	256000788	NP_001157724.1	tropomyosin alpha-1 chain isoform Tpm1.8cy [Mus musculus]	24	[R].AQKDEEKMEIQEIQLKEAK.[H]	AQKDEEKMEIQEIQLkEAK	[K16](Biotin)	629.321	4	113	3	EIQEIQLkEAKHIAE	256000788	1	0	0	1	629.321			629.321	4			4	1	0	0	1	189779	0	0	127564	1	1	113	1	1	113; 132	2	2
Tpm1	22003	256000788	NP_001157724.1	tropomyosin alpha-1 chain isoform Tpm1.8cy [Mus musculus]	24	[R].KLVIIESDLERAEER.[A]	kLVIIESDLERAEER	[K1](Biotin)	676.028	3	132	2	KYEEVARkLVIIESD	256000788	1	0	0	0	676.028				3				1	0	0	0	67377.8	0	0	0	1	0	113	1	1	113; 132	2	2
Chd4	107932	568940125	XP_006505343.1	chromodomain-helicase-DNA-binding protein 4 isoform X1 [Mus musculus]	176	[K].KVAPLKIK.[L]	KVAPLKIK	[K](Biotin)			X	2
Chd4	107932	568940125	XP_006505343.1	chromodomain-helicase-DNA-binding protein 4 isoform X1 [Mus musculus]	176	[R].EIIKQEESVDPDYWEKLLR.[H]	EIIKQEESVDPDYWEkLLR	[K16](Biotin)	872.772	3	1316	2	VDPDYWEkLLRHHYE	568940125	0	1	0	0		872.772				3			0	1	0	0	0	36701.1	0	0	1	0				1316	1	1
Cald1	109624	568940274	XP_006505415.1	caldesmon isoform X7 [Mus musculus]	63	[K].GSSLKIEERAEFLNK.[S]	GSSLkIEERAEFLNK	[K5](Biotin)	649.672	3	389	2	TPKGSSLkIEERAEF	568940274	1	0	0	0	649.672				3				1	0	0	0	350324	0	0	0	1	0	119; 245; 247; 278; 379; 384; 389; 399; 417; 456; 461; 501	23	12	119; 245; 247; 379; 384; 389; 399; 417; 456; 461; 501	25	11
Cald1	109624	568940274	XP_006505415.1	caldesmon isoform X7 [Mus musculus]	63	[K].GSSLKIEER.[A]	GSSLkIEER	[K5](Biotin)	622.82	2	389	1	TPKGSSLkIEERAEF	568940274	1	1	1	1	622.82	622.819	622.82	622.819	2	2	2	2	1	1	1	1	12838852	7.98205e+06	10601729	9916071	2	2	119; 245; 247; 278; 379; 384; 389; 399; 417; 456; 461; 501	23	12	119; 245; 247; 379; 384; 389; 399; 417; 456; 461; 501	25	11
Cald1	109624	568940274	XP_006505415.1	caldesmon isoform X7 [Mus musculus]	63	[R].NIKSMWEK.[G]	NIkSMWEK	[K3](Biotin)	631.308	2	456	1	AEGVRNIkSMWEKGS	568940274	1	1	1	1	631.308	631.307	631.307	631.307	2	2	2	2	1	1	2	1	2.81486e+06	1476926	2.72895e+06	1.65644e+06	2	3	119; 245; 247; 278; 379; 384; 389; 399; 417; 456; 461; 501	23	12	119; 245; 247; 379; 384; 389; 399; 417; 456; 461; 501	25	11
Cald1	109624	568940274	XP_006505415.1	caldesmon isoform X7 [Mus musculus]	63	[K].CFTPKGSSLKIEER.[A]	CFTPkGSSLKIEER	[K5](Biotin)	626.648	3	384	2	PFKCFTPkGSSLKIE	568940274	1	1	1	1	626.646	626.646	626.646	626.648	3	3	3	3	1	1	1	1	407856	204268	285634	262325	2	2	119; 245; 247; 278; 379; 384; 389; 399; 417; 456; 461; 501	23	12	119; 245; 247; 379; 384; 389; 399; 417; 456; 461; 501	25	11
Cald1	109624	568940274	XP_006505415.1	caldesmon isoform X7 [Mus musculus]	63	[R].NIKSMWEK.[G]	NIkSMWEK	[K3](Biotin)	631.308	2	456	1	AEGVRNIkSMWEKGS	568940274	1	1	1	1	631.308	631.307	631.307	631.307	2	2	2	2	1	1	2	1	2.81486e+06	1476926	2.72895e+06	1.65644e+06	2	3	119; 245; 247; 278; 379; 384; 389; 399; 417; 456; 461; 501	23	12	119; 245; 247; 379; 384; 389; 399; 417; 456; 461; 501	25	11
Cald1	109624	568940274	XP_006505415.1	caldesmon isoform X7 [Mus musculus]	63	[R].AEFLNKSVQK.[S]	AEFLNkSVQK	[K6](Biotin)	695.364	2	399	1	ERAEFLNkSVQKSGV	568940274	1	0	1	0	695.364		695.364		2		2		1	0	1	0	209456	0	226205	0	1	1	119; 245; 247; 278; 379; 384; 389; 399; 417; 456; 461; 501	23	12	119; 245; 247; 379; 384; 389; 399; 417; 456; 461; 501	25	11
Cald1	109624	568940274	XP_006505415.1	caldesmon isoform X7 [Mus musculus]	63	[R].QKEFDPTITDGSLSGPSRR.[M]	QkEFDPTITDGSLSGPSRR	[K2](Biotin)	773.047	3	119	2	QEALERQkEFDPTIT	568940274	1	1	1	1	773.047	773.045	773.046	773.047	3	3	3	3	1	1	1	1	1113710	661443	801415	706238	2	2	119; 245; 247; 278; 379; 384; 389; 399; 417; 456; 461; 501	23	12	119; 245; 247; 379; 384; 389; 399; 417; 456; 461; 501	25	11
Cald1	109624	568940274	XP_006505415.1	caldesmon isoform X7 [Mus musculus]	63	[K].SPDGNKSPAPKPSDLRPGDVSGKR.[N]	SPDGNkSPAPKPSDLRPGDVSGKR	[K6](Biotin)	672.845	5	501	2	TKSPDGNkSPAPKPS	568940274	1	1	1	1	538.477	538.476	672.845	672.845	5	5	4	4	2	2	1	1	782984	487836	214345	154113	4	2	119; 245; 247; 278; 379; 384; 389; 399; 417; 456; 461; 501	23	12	119; 245; 247; 379; 384; 389; 399; 417; 456; 461; 501	25	11
Cald1	109624	568940274	XP_006505415.1	caldesmon isoform X7 [Mus musculus]	63	[K].AQNGEFMTHKLK.[Q]	AQNGEFMTHkLK	[K10](Biotin)	543.934	3	245	1	NGEFMTHkLKQTENA	568940274	1	0	1	1	543.934		543.934	543.934	3		3	3	1	0	1	1	834600	0	509886	544521	1	2	119; 245; 247; 278; 379; 384; 389; 399; 417; 456; 461; 501	23	12	119; 245; 247; 379; 384; 389; 399; 417; 456; 461; 501	25	11
Cald1	109624	568940274	XP_006505415.1	caldesmon isoform X7 [Mus musculus]	63	[K].LKQTENAFSPSR.[S]	LkQTENAFSPSR	[K2](Biotin)	802.4	2	247	1	EFMTHKLkQTENAFS	568940274	1	1	1	1	802.398	802.398	802.4	802.398	2	2	2	2	1	1	1	1	366937	193880	241412	166102	2	2	119; 245; 247; 278; 379; 384; 389; 399; 417; 456; 461; 501	23	12	119; 245; 247; 379; 384; 389; 399; 417; 456; 461; 501	25	11
Cald1	109624	568940274	XP_006505415.1	caldesmon isoform X7 [Mus musculus]	63	[R].ASGDKEAEGAPQVEAGKR.[L]	ASGDKEAEGAPQVEAGkR	[K17](Biotin)	675.994	3	278	2	APQVEAGkRLEELRR	568940274	0	0	0	1				675.994				3	0	0	0	1	0	0	0	79939.9	0	1	119; 245; 247; 278; 379; 384; 389; 399; 417; 456; 461; 501	23	12	119; 245; 247; 379; 384; 389; 399; 417; 456; 461; 501	25	11
Cald1	109624	568940274	XP_006505415.1	caldesmon isoform X7 [Mus musculus]	63	[R].QKMPEDGLSEDKKPFKCFTPK.[G]	QKMPEDGLSEDKKPFkCFTPK	[K16](Biotin)	684.838	4	379	3	SEDKKPFkCFTPKGS	568940274	1	1	0	1	684.835	684.837		684.838	4	4		4	1	1	0	1	405872	323580	0	252551	2	1	119; 245; 247; 278; 379; 384; 389; 399; 417; 456; 461; 501	23	12	119; 245; 247; 379; 384; 389; 399; 417; 456; 461; 501	25	11
Cald1	109624	568940274	XP_006505415.1	caldesmon isoform X7 [Mus musculus]	63	[K].SMWEKGSVFSAPSASGTPNKETAGLK.[V]	SMWEkGSVFSAPSASGTPNKETAGLK	[K5](Biotin)	965.137	3	461	2	NIKSMWEkGSVFSAP	568940274	1	1	1	0	965.135	965.136	965.137		3	3	3		1	1	1	0	705960	366446	492687	0	2	1	119; 245; 247; 278; 379; 384; 389; 399; 417; 456; 461; 501	23	12	119; 245; 247; 379; 384; 389; 399; 417; 456; 461; 501	25	11
Cald1	109624	568940274	XP_006505415.1	caldesmon isoform X7 [Mus musculus]	63	[R].INEWLTKSPDGNKSPAPKPSDLRPGDVSGKR.[N]	INEWLTKSPDGNKSPAPKPSDLRPGDVSGKR	[K](Biotin)			X	3
Cald1	109624	568940274	XP_006505415.1	caldesmon isoform X7 [Mus musculus]	63	[R].STHQAAVVSKIDSR.[L]	STHQAAVVSkIDSR	[K10](Biotin)	862.943	2	417	1	HQAAVVSkIDSRLEQ	568940274	1	1	1	0	862.943	862.941	862.941		2	2	2		1	1	1	0	158011	0	0	0	2	1	119; 245; 247; 278; 379; 384; 389; 399; 417; 456; 461; 501	23	12	119; 245; 247; 379; 384; 389; 399; 417; 456; 461; 501	25	11
Cald1	109624	755515846	XP_006505409.2	caldesmon isoform X2 [Mus musculus]	88	[K].GSSLKIEERAEFLNK.[S]	GSSLkIEERAEFLNK	[K5](Biotin)	649.672	3	619	2	TPKGSSLkIEERAEF	755515846	1	0	0	0	649.672				3				1	0	0	0	350324	0	0	0	1	0	113; 433; 475; 477; 508; 609; 614; 619; 629; 647; 686; 691; 731; 765	29	14	113; 433; 475; 477; 609; 614; 619; 629; 647; 686; 691; 731; 765	31	13
Cald1	109624	755515846	XP_006505409.2	caldesmon isoform X2 [Mus musculus]	88	[K].QSVDKVTSPTKV.[-]	QSVDKVTSPTkV	[K11](Biotin)	757.899	2	765	2	DKVTSPTkV	755515846	1	1	1	1	757.897	757.899	757.897	757.898	2	2	2	2	1	1	1	1	256547	150168	218480	201057	2	2	113; 433; 475; 477; 508; 609; 614; 619; 629; 647; 686; 691; 731; 765	29	14	113; 433; 475; 477; 609; 614; 619; 629; 647; 686; 691; 731; 765	31	13
Cald1	109624	755515846	XP_006505409.2	caldesmon isoform X2 [Mus musculus]	88	[K].GSSLKIEER.[A]	GSSLkIEER	[K5](Biotin)	622.82	2	619	1	TPKGSSLkIEERAEF	755515846	1	1	1	1	622.82	622.819	622.82	622.819	2	2	2	2	1	1	1	1	12838852	7.98205e+06	10601729	9916071	2	2	113; 433; 475; 477; 508; 609; 614; 619; 629; 647; 686; 691; 731; 765	29	14	113; 433; 475; 477; 609; 614; 619; 629; 647; 686; 691; 731; 765	31	13
Cald1	109624	755515846	XP_006505409.2	caldesmon isoform X2 [Mus musculus]	88	[R].NIKSMWEK.[G]	NIkSMWEK	[K3](Biotin)	631.308	2	686	1	AEGVRNIkSMWEKGS	755515846	1	1	1	1	631.308	631.307	631.307	631.307	2	2	2	2	1	1	2	1	2.81486e+06	1476926	2.72895e+06	1.65644e+06	2	3	113; 433; 475; 477; 508; 609; 614; 619; 629; 647; 686; 691; 731; 765	29	14	113; 433; 475; 477; 609; 614; 619; 629; 647; 686; 691; 731; 765	31	13
Cald1	109624	755515846	XP_006505409.2	caldesmon isoform X2 [Mus musculus]	88	[K].CFTPKGSSLKIEER.[A]	CFTPkGSSLKIEER	[K5](Biotin)	626.648	3	614	2	PFKCFTPkGSSLKIE	755515846	1	1	1	1	626.646	626.646	626.646	626.648	3	3	3	3	1	1	1	1	407856	204268	285634	262325	2	2	113; 433; 475; 477; 508; 609; 614; 619; 629; 647; 686; 691; 731; 765	29	14	113; 433; 475; 477; 609; 614; 619; 629; 647; 686; 691; 731; 765	31	13
Cald1	109624	755515846	XP_006505409.2	caldesmon isoform X2 [Mus musculus]	88	[R].NIKSMWEK.[G]	NIkSMWEK	[K3](Biotin)	631.308	2	686	1	AEGVRNIkSMWEKGS	755515846	1	1	1	1	631.308	631.307	631.307	631.307	2	2	2	2	1	1	2	1	2.81486e+06	1476926	2.72895e+06	1.65644e+06	2	3	113; 433; 475; 477; 508; 609; 614; 619; 629; 647; 686; 691; 731; 765	29	14	113; 433; 475; 477; 609; 614; 619; 629; 647; 686; 691; 731; 765	31	13
Cald1	109624	755515846	XP_006505409.2	caldesmon isoform X2 [Mus musculus]	88	[R].AEFLNKSVQK.[S]	AEFLNkSVQK	[K6](Biotin)	695.364	2	629	1	ERAEFLNkSVQKSGV	755515846	1	0	1	0	695.364		695.364		2		2		1	0	1	0	209456	0	226205	0	1	1	113; 433; 475; 477; 508; 609; 614; 619; 629; 647; 686; 691; 731; 765	29	14	113; 433; 475; 477; 609; 614; 619; 629; 647; 686; 691; 731; 765	31	13
Cald1	109624	755515846	XP_006505409.2	caldesmon isoform X2 [Mus musculus]	88	[R].QKEFDPTITDGSLSGPSRR.[M]	QkEFDPTITDGSLSGPSRR	[K2](Biotin)	773.047	3	113	2	QEALERQkEFDPTIT	755515846	1	1	1	1	773.047	773.045	773.046	773.047	3	3	3	3	1	1	1	1	1113710	661443	801415	706238	2	2	113; 433; 475; 477; 508; 609; 614; 619; 629; 647; 686; 691; 731; 765	29	14	113; 433; 475; 477; 609; 614; 619; 629; 647; 686; 691; 731; 765	31	13
Cald1	109624	755515846	XP_006505409.2	caldesmon isoform X2 [Mus musculus]	88	[K].SPDGNKSPAPKPSDLRPGDVSGKR.[N]	SPDGNkSPAPKPSDLRPGDVSGKR	[K6](Biotin)	672.845	5	731	2	TKSPDGNkSPAPKPS	755515846	1	1	1	1	538.477	538.476	672.845	672.845	5	5	4	4	2	2	1	1	782984	487836	214345	154113	4	2	113; 433; 475; 477; 508; 609; 614; 619; 629; 647; 686; 691; 731; 765	29	14	113; 433; 475; 477; 609; 614; 619; 629; 647; 686; 691; 731; 765	31	13
Cald1	109624	755515846	XP_006505409.2	caldesmon isoform X2 [Mus musculus]	88	[K].AQNGEFMTHKLK.[Q]	AQNGEFMTHkLK	[K10](Biotin)	543.934	3	475	1	NGEFMTHkLKQTENA	755515846	1	0	1	1	543.934		543.934	543.934	3		3	3	1	0	1	1	834600	0	509886	544521	1	2	113; 433; 475; 477; 508; 609; 614; 619; 629; 647; 686; 691; 731; 765	29	14	113; 433; 475; 477; 609; 614; 619; 629; 647; 686; 691; 731; 765	31	13
Cald1	109624	755515846	XP_006505409.2	caldesmon isoform X2 [Mus musculus]	88	[K].LKQTENAFSPSR.[S]	LkQTENAFSPSR	[K2](Biotin)	802.4	2	477	1	EFMTHKLkQTENAFS	755515846	1	1	1	1	802.398	802.398	802.4	802.398	2	2	2	2	1	1	1	1	366937	193880	241412	166102	2	2	113; 433; 475; 477; 508; 609; 614; 619; 629; 647; 686; 691; 731; 765	29	14	113; 433; 475; 477; 609; 614; 619; 629; 647; 686; 691; 731; 765	31	13
Cald1	109624	755515846	XP_006505409.2	caldesmon isoform X2 [Mus musculus]	88	[R].KEEIKDEK.[I]	kEEIKDEK	[K1](Biotin)	622.814	3	433	2	DDKPAFRkEEIKDEK	755515846	1	1	1	1	415.544	622.814	415.545	415.544	3	2	3	3	2	2	2	2	1.78734e+06	1.33869e+06	1.2602e+06	859264	4	4	113; 433; 475; 477; 508; 609; 614; 619; 629; 647; 686; 691; 731; 765	29	14	113; 433; 475; 477; 609; 614; 619; 629; 647; 686; 691; 731; 765	31	13
Cald1	109624	755515846	XP_006505409.2	caldesmon isoform X2 [Mus musculus]	88	[R].ASGDKEAEGAPQVEAGKR.[L]	ASGDKEAEGAPQVEAGkR	[K17](Biotin)	675.994	3	508	2	APQVEAGkRLEELRR	755515846	0	0	0	1				675.994				3	0	0	0	1	0	0	0	79939.9	0	1	113; 433; 475; 477; 508; 609; 614; 619; 629; 647; 686; 691; 731; 765	29	14	113; 433; 475; 477; 609; 614; 619; 629; 647; 686; 691; 731; 765	31	13
Cald1	109624	755515846	XP_006505409.2	caldesmon isoform X2 [Mus musculus]	88	[R].QKMPEDGLSEDKKPFKCFTPK.[G]	QKMPEDGLSEDKKPFkCFTPK	[K16](Biotin)	684.838	4	609	3	SEDKKPFkCFTPKGS	755515846	1	1	0	1	684.835	684.837		684.838	4	4		4	1	1	0	1	405872	323580	0	252551	2	1	113; 433; 475; 477; 508; 609; 614; 619; 629; 647; 686; 691; 731; 765	29	14	113; 433; 475; 477; 609; 614; 619; 629; 647; 686; 691; 731; 765	31	13
Cald1	109624	755515846	XP_006505409.2	caldesmon isoform X2 [Mus musculus]	88	[K].SMWEKGSVFSAPSASGTPNKETAGLK.[V]	SMWEkGSVFSAPSASGTPNKETAGLK	[K5](Biotin)	965.137	3	691	2	NIKSMWEkGSVFSAP	755515846	1	1	1	0	965.135	965.136	965.137		3	3	3		1	1	1	0	705960	366446	492687	0	2	1	113; 433; 475; 477; 508; 609; 614; 619; 629; 647; 686; 691; 731; 765	29	14	113; 433; 475; 477; 609; 614; 619; 629; 647; 686; 691; 731; 765	31	13
Cald1	109624	755515846	XP_006505409.2	caldesmon isoform X2 [Mus musculus]	88	[R].INEWLTKSPDGNKSPAPKPSDLRPGDVSGKR.[N]	INEWLTKSPDGNKSPAPKPSDLRPGDVSGKR	[K](Biotin)			X	3
Cald1	109624	755515846	XP_006505409.2	caldesmon isoform X2 [Mus musculus]	88	[R].STHQAAVVSKIDSR.[L]	STHQAAVVSkIDSR	[K10](Biotin)	862.943	2	647	1	HQAAVVSkIDSRLEQ	755515846	1	1	1	0	862.943	862.941	862.941		2	2	2		1	1	1	0	158011	0	0	0	2	1	113; 433; 475; 477; 508; 609; 614; 619; 629; 647; 686; 691; 731; 765	29	14	113; 433; 475; 477; 609; 614; 619; 629; 647; 686; 691; 731; 765	31	13
Ddx3x	13205	6753620	NP_034158.1	ATP-dependent RNA helicase DDX3X [Mus musculus]	32	[K].GFYDKDSSGWSSSKDKDAYSSFGSR.[G]	GFYDKDSSGWSSSKDKDAYSSFGSR	[K](Biotin)			X	3
Ddx3x	13205	6753620	NP_034158.1	ATP-dependent RNA helicase DDX3X [Mus musculus]	32	[R].GKSSFFGDRGSGSR.[G]	GkSSFFGDRGSGSR	[K2](Biotin)	557.596	3	81	2	SRGDSRGkSSFFGDR	6753620	1	1	1	1	557.595	557.595	557.596	557.595	3	3	3	3	1	1	1	1	400155	272869	307761	212184	2	2	81	2	1	81	2	1
Baz1b	22385	170295818	NP_035844.2	tyrosine-protein kinase BAZ1B [Mus musculus]	161	[K].YSLPSKFSDFLLDPYKYMTLNPSTKR.[R]	YSLPSKFSDFLLDPYkYMTLNPSTKR	[K16](Biotin)	835.171	4	297	3	DFLLDPYkYMTLNPS	170295818	0	0	0	1				835.171				4	0	0	0	1	0	0	0	131625	0	1	297; 335; 371; 964	72	4	297; 335; 964	62	3
Baz1b	22385	170295818	NP_035844.2	tyrosine-protein kinase BAZ1B [Mus musculus]	161	[K].SPEEHLEGVMKIMSPNNNK.[L]	SPEEHLEGVMkIMSPNNNK	[K11](Biotin)	794.043	3	371	1	EHLEGVMkIMSPNNN	170295818	0	0	1	1			794.043	794.043			3	3	0	0	1	1	0	0	276707	280856	0	2	297; 335; 371; 964	72	4	297; 335; 964	62	3
Baz1b	22385	170295818	NP_035844.2	tyrosine-protein kinase BAZ1B [Mus musculus]	161	[K].YSLPSKFSDFLLDPYKYMTLNPSTK.[R]	YSLPSKFSDFLLDPYkYMTLNPSTK	[K16](Biotin)	1066.53	4	297	2	DFLLDPYkYMTLNPS	170295818	1	1	1	1	800.146	1066.53	1066.53	1061.2	4	3	3	3	3	2	2	3	339372	56185.9	136666	1493822	5	5	297; 335; 371; 964	72	4	297; 335; 964	62	3
Baz1b	22385	170295818	NP_035844.2	tyrosine-protein kinase BAZ1B [Mus musculus]	161	[K].FSDFLLDPYKYMTLNPSTK.[R]	FSDFLLDPYkYMTLNPSTK	[K10](Biotin)	841.406	3	297	1	DFLLDPYkYMTLNPS	170295818	1	1	1	1	841.405	841.405	841.406	841.405	3	3	3	3	8	8	8	8	1.06718e+07	6.3275e+06	9.56833e+06	2.34677e+07	16	16	297; 335; 371; 964	72	4	297; 335; 964	62	3
Baz1b	22385	170295818	NP_035844.2	tyrosine-protein kinase BAZ1B [Mus musculus]	161	[K].FSDFLLDPYKYMTLNPSTKR.[R]	FSDFLLDPYkYMTLNPSTKR	[K10](Biotin)	893.44	3	297	2	DFLLDPYkYMTLNPS	170295818	1	1	1	1	893.436	893.436	888.108	893.44	3	3	3	3	4	3	4	4	1.48175e+06	853023	1.24316e+06	4.11928e+06	7	8	297; 335; 371; 964	72	4	297; 335; 964	62	3
Baz1b	22385	170295818	NP_035844.2	tyrosine-protein kinase BAZ1B [Mus musculus]	161	[K].FSDFLLDPYKYMTLNPSTK.[R]	FSDFLLDPYkYMTLNPSTK	[K10](Biotin)	841.406	3	297	1	DFLLDPYkYMTLNPS	170295818	1	1	1	1	841.405	841.405	841.406	841.405	3	3	3	3	8	8	8	8	1.06718e+07	6.3275e+06	9.56833e+06	2.34677e+07	16	16	297; 335; 371; 964	72	4	297; 335; 964	62	3
Baz1b	22385	170295818	NP_035844.2	tyrosine-protein kinase BAZ1B [Mus musculus]	161	[K].FSDFLLDPYKYMTLNPSTKR.[R]	FSDFLLDPYkYMTLNPSTKR	[K10](Biotin)	893.44	3	297	2	DFLLDPYkYMTLNPS	170295818	1	1	1	1	893.436	893.436	888.108	893.44	3	3	3	3	4	3	4	4	1.48175e+06	853023	1.24316e+06	4.11928e+06	7	8	297; 335; 371; 964	72	4	297; 335; 964	62	3
Baz1b	22385	170295818	NP_035844.2	tyrosine-protein kinase BAZ1B [Mus musculus]	161	[K].ANLGKNASVNAHHGPALEAVETTVPK.[Q]	ANLGkNASVNAHHGPALEAVETTVPK	[K5](Biotin)	713.62	4	964	1	SKKANLGkNASVNAH	170295818	0	1	1	1		713.618	713.619	713.62		4	4	4	0	1	1	1	0	102590	246777	194747	1	2	297; 335; 371; 964	72	4	297; 335; 964	62	3
Baz1b	22385	170295818	NP_035844.2	tyrosine-protein kinase BAZ1B [Mus musculus]	161	[K].KYSLPSKFSDFLLDPYKYMTLNPSTK.[R]	KYSLPSKFSDFLLDPYKYMTLNPSTK	[K](Biotin)			X	3
Baz1b	22385	170295818	NP_035844.2	tyrosine-protein kinase BAZ1B [Mus musculus]	161	[R].DSSSLSSPLNPKLWCHVHLEK.[S]	DSSSLSSPLNPkLWCHVHLEK	[K12](Biotin)	887.442	4	335	1	LSSPLNPkLWCHVHL	170295818	1	1	1	1	665.83	887.438	665.831	887.442	4	3	4	3	2	2	2	2	3.57643e+06	3.16497e+06	5.02176e+06	6.12292e+06	4	4	297; 335; 371; 964	72	4	297; 335; 964	62	3
Baz1b	22385	170295818	NP_035844.2	tyrosine-protein kinase BAZ1B [Mus musculus]	161	[K].KYSLPSKFSDFLLDPYKYMTLNPSTK.[R]	KYSLPSKFSDFLLDPYkYMTLNPSTK	[K17](Biotin)	832.17	4	297	3	DFLLDPYkYMTLNPS	170295818	1	1	1	1	832.169	828.17	832.169	832.17	4	4	4	4	2	1	2	3	402499	108214	212278	2.83541e+06	3	5	297; 335; 371; 964	72	4	297; 335; 964	62	3
Baz1b	22385	170295818	NP_035844.2	tyrosine-protein kinase BAZ1B [Mus musculus]	161	[K].RDSSSLSSPLNPKLWCHVHLEK.[S]	RDSSSLSSPLNPkLWCHVHLEK	[K13](Biotin)	704.856	5	335	2	LSSPLNPkLWCHVHL	170295818	1	1	1	1	704.856	564.086	704.855	704.855	4	5	4	4	1	2	3	2	3530532	5427936	8.37912e+06	9.56611e+06	3	5	297; 335; 371; 964	72	4	297; 335; 964	62	3
Baz1b	22385	170295818	NP_035844.2	tyrosine-protein kinase BAZ1B [Mus musculus]	161	[K].YSLPSKFSDFLLDPYKYMTLNPSTK.[R]	YSLPSKFSDFLLDPYKYMTLNPSTK	[K](Biotin)			X	2
Hnrnpf	98758	261878607	NP_001159904.1	heterogeneous nuclear ribonucleoprotein F [Mus musculus]	16	[R].YIGIVKQAGLDR.[M]	YIGIVkQAGLDR	[K6](Biotin)	779.926	2	224	1	RRYIGIVkQAGLDRM	261878607	1	0	1	1	779.925		779.925	779.926	2		2	2	1	0	1	1	1.06827e+06	0	1.39328e+06	1.0591e+06	1	2	224	4	1	200; 224	4	2
Hnrnpf	98758	261878607	NP_001159904.1	heterogeneous nuclear ribonucleoprotein F [Mus musculus]	16	[R].RYIGIVKQAGLDR.[M]	RYIGIVkQAGLDR	[K7](Biotin)	572.32	3	224	2	RRYIGIVkQAGLDRM	261878607	1	1	1	1	572.32	572.319	572.32	572.32	3	3	3	3	1	1	1	1	1.54351e+06	1.19752e+06	2.09742e+06	1.67942e+06	2	2	224	4	1	200; 224	4	2
Hnrnpf	98758	261878607	NP_001159904.1	heterogeneous nuclear ribonucleoprotein F [Mus musculus]	16	[R].SYSDPPLKFMSVQRPGPYDRPGTAR.[R]	SYSDPPLkFMSVQRPGPYDRPGTAR	[K8](Biotin)	762.877	4	200	1	SYSDPPLkFMSVQRP	261878607	0	1	0	0		762.877				4			0	1	0	0	0	520209	0	0	1	0	224	4	1	200; 224	4	2
Tmpo	21917	121949760	NP_035735.2	lamina-associated polypeptide 2 isoform alpha [Mus musculus]	47	[R].ETTTTYSKDIVENICR.[G]	ETTTTYSkDIVENICR	[K8](Biotin)	719.339	3	321	1	ETTTTYSkDIVENIC	121949760	1	1	1	1	719.339	719.338	719.338	719.339	3	3	3	3	1	1	1	1	1.06577e+06	0	2227667	909026	2	2	241; 262; 267; 288; 321; 433	22	6	262; 267; 288; 321; 433	18	5
Tmpo	21917	121949760	NP_035735.2	lamina-associated polypeptide 2 isoform alpha [Mus musculus]	47	[R].ETCTDTALPGKGQTHKLAPGR.[S]	ETCTDTALPGKGQTHkLAPGR	[K16](Biotin)	616.808	4	267	2	PGKGQTHkLAPGRSL	121949760	0	1	1	1		616.805	616.807	616.808		4	4	4	0	2	1	2	0	400619	366084	351747	2	3	241; 262; 267; 288; 321; 433	22	6	262; 267; 288; 321; 433	18	5
Tmpo	21917	121949760	NP_035735.2	lamina-associated polypeptide 2 isoform alpha [Mus musculus]	47	[K].KVQTTK.[R]	kVQTTK	[K1](Biotin)	465.757	2	241	1	TELQAAKkVQTTKRD	121949760	0	0	1	1			465.757	465.757			2	2	0	0	1	1	0	0	2.41546e+06	0	0	2	241; 262; 267; 288; 321; 433	22	6	262; 267; 288; 321; 433	18	5
Tmpo	21917	121949760	NP_035735.2	lamina-associated polypeptide 2 isoform alpha [Mus musculus]	47	[R].SLFIPSESSYDRCVEKSSSPSSQR.[E]	SLFIPSESSYDRCVEkSSSPSSQR	[K16](Biotin)	987.128	3	288	2	SYDRCVEkSSSPSSQ	121949760	1	1	1	1	987.122	987.126	987.123	987.128	3	3	3	3	1	1	1	1	0	243280	563356	334753	2	2	241; 262; 267; 288; 321; 433	22	6	262; 267; 288; 321; 433	18	5
Tmpo	21917	121949760	NP_035735.2	lamina-associated polypeptide 2 isoform alpha [Mus musculus]	47	[R].LSEKPAR.[G]	LSEkPAR	[K4](Biotin)	513.774	2	433	0	KVPRLSEkPARGGDS	121949760	1	1	1	1	513.774	513.774	513.773	513.772	2	2	2	2	1	1	1	1	370819	297352	802081	537531	2	2	241; 262; 267; 288; 321; 433	22	6	262; 267; 288; 321; 433	18	5
Tmpo	21917	121949760	NP_035735.2	lamina-associated polypeptide 2 isoform alpha [Mus musculus]	47	[R].ETCTDTALPGKGQTHK.[L]	ETCTDTALPGKGQTHK	[K](Biotin)			X	1
Tmpo	21917	121949760	NP_035735.2	lamina-associated polypeptide 2 isoform alpha [Mus musculus]	47	[R].CVEKSSSPSSQR.[E]	CVEkSSSPSSQR	[K4](Biotin)	789.357	2	288	1	SYDRCVEkSSSPSSQ	121949760	1	1	1	1	789.356	789.357	789.357	789.357	2	2	2	2	1	2	1	2	2.38762e+06	2.56701e+06	4.39837e+06	5374091	3	3	241; 262; 267; 288; 321; 433	22	6	262; 267; 288; 321; 433	18	5
Tmpo	21917	121949760	NP_035735.2	lamina-associated polypeptide 2 isoform alpha [Mus musculus]	47	[K].RDPPRETCTDTALPGKGQTHK.[L]	RDPPRETCTDTALPGkGQTHK	[K16](Biotin)	864.424	4	262	3	TDTALPGkGQTHKLA	121949760	1	1	1	1	648.567	648.567	864.424	864.422	4	4	3	3	2	2	2	3	3.30962e+06	2.66346e+06	5.2396e+06	5.33716e+06	4	5	241; 262; 267; 288; 321; 433	22	6	262; 267; 288; 321; 433	18	5
Tmpo	21917	121949760	NP_035735.2	lamina-associated polypeptide 2 isoform alpha [Mus musculus]	47	[R].CVEKSSSPSSQREFAAR.[L]	CVEkSSSPSSQREFAAR	[K4](Biotin)	718.004	3	288	2	SYDRCVEkSSSPSSQ	121949760	1	1	1	1	718.003	718.002	718.004	718.004	3	3	3	3	1	1	1	1	0	98939.1	0	139377	2	2	241; 262; 267; 288; 321; 433	22	6	262; 267; 288; 321; 433	18	5
Tmpo	21917	121949760	NP_035735.2	lamina-associated polypeptide 2 isoform alpha [Mus musculus]	47	[R].LSEKPARGGDSGSCVAFQNTPGSEHR.[S]	LSEkPARGGDSGSCVAFQNTPGSEHR	[K4](Biotin)	743.345	4	433	1	KVPRLSEkPARGGDS	121949760	1	0	0	1	743.345			743.345	4			4	1	0	0	1	327042	0	0	217734	1	1	241; 262; 267; 288; 321; 433	22	6	262; 267; 288; 321; 433	18	5
Ddx39b	53817	9790069	NP_062667.1	spliceosome RNA helicase Ddx39b [Mus musculus]	29	[K].DVKGSYVSIHSSGFR.[D]	DVkGSYVSIHSSGFR	[K3](Biotin)	622.304	3	36	1	APAKKDVkGSYVSIH	9790069	1	0	0	0	622.304				3				1	0	0	0	227452	0	0	0	1	0				36	1	1
Hnrnpul2	68693	124487099	NP_001074665.1	heterogeneous nuclear ribonucleoprotein U-like protein 2 [Mus musculus]	44	[R].LKVTELR.[S]	LkVTELR	[K2](Biotin)	542.813	2	7	1	MEVKRLkVTELRSE	124487099	1	0	1	1	542.812		542.813	542.812	2		2	2	1	0	1	1	607884	0	769681	486759	1	2	7; 26	3	2	7; 26	3	2
Hnrnpul2	68693	124487099	NP_001074665.1	heterogeneous nuclear ribonucleoprotein U-like protein 2 [Mus musculus]	44	[R].GLKMDLAQR.[L]	GLkMDLAQR	[K3](Biotin)	629.326	2	26	1	GLDSRGLkMDLAQRL	124487099	1	1	1	0	629.326	629.326	629.325		2	2	2		1	1	1	0	527492	290486	419952	0	2	1	7; 26	3	2	7; 26	3	2
Nop58	55989	120407050	NP_061356.2	nucleolar protein 58 [Mus musculus]	72	[K].ALAKAEKYEHK.[S]	ALAkAEKYEHK	[K4](Biotin)	505.264	3	415	2	GTGKALAkAEKYEHK	120407050	0	0	0	1				505.264				3	0	0	0	1	0	0	0	115581	0	1	411; 415	2	2	323; 411	2	2
Nop58	55989	120407050	NP_061356.2	nucleolar protein 58 [Mus musculus]	72	[R].KISGTGKALAK.[A]	KISGTGkALAK	[K7](Biotin)	433.92	3	411	2	RKISGTGkALAKAEK	120407050	0	1	0	1		433.92		433.92		3		3	0	1	0	1	0	134161	0	171428	1	1	411; 415	2	2	323; 411	2	2
Nop58	55989	120407050	NP_061356.2	nucleolar protein 58 [Mus musculus]	72	[K].HAASTVQILGAEKALFR.[A]	HAASTVQILGAEkALFR	[K13](Biotin)	680.035	3	323	1	VQILGAEkALFRALK	120407050	1	0	0	0	680.035				3				1	0	0	0	84102	0	0	0	1	0	411; 415	2	2	323; 411	2	2
Matr3	17184	25141233	NP_034901.2	matrin-3 [Mus musculus]	66	[R].IGPYQPNVPVGIDYVIPKTGFYCK.[L]	IGPYQPNVPVGIDYVIPkTGFYCK	[K18](Biotin)	984.506	3	797	1	GIDYVIPkTGFYCKL	25141233	1	0	1	1	984.505		984.506	984.499	3		3	3	2	0	1	1	127977	0	24014.2	52729.7	2	2	797	2	1	797	2	1
Ptbp1	19205	116517301	NP_001070831.1	polypyrimidine tract-binding protein 1 isoform 1 [Mus musculus]	33	[-].MDGIVPDIAVGTKR.[G]	MDGIVPDIAVGTkR	[K13](Biotin)	870.447	3	13	1	PDIAVGTkRGSDELF	116517301	1	1	1	1	870.446	580.632	870.447	870.445	2	3	2	2	2	3	2	2	357874	498609	375578	256598	5	4	13	4	1	13	5	1
Ptbp1	19205	116517301	NP_001070831.1	polypyrimidine tract-binding protein 1 isoform 1 [Mus musculus]	33	[K].VTNILMLKGK.[SN]	VTNILMLKGK	[K](Biotin)			X	1
Rif1	51869	146231944	NP_780447.4	telomere-associated protein RIF1 [Mus musculus]	188	[R].RQTFITLEKFDGSETRPFSPSPLNNISSTVTVR.[N]	RQTFITLEkFDGSETRPFSPSPLNNISSTVTVR	[K9](Biotin)	988.508	4	1228	2	QTFITLEkFDGSETR	146231944	0	0	0	1				988.508				4	0	0	0	1	0	0	0	372458	0	1	405; 1049; 1077; 1177; 1228; 1276; 1404; 1647; 1693; 1731; 1739; 1866; 2041; 2139; 2155; 2196; 2305; 2337	39	18	405; 1049; 1077; 1177; 1276; 1404; 1731; 1739; 2041; 2155; 2337	27	11
Rif1	51869	146231944	NP_780447.4	telomere-associated protein RIF1 [Mus musculus]	188	[R].CVWSPLASPSTSILKR.[G]	CVWSPLASPSTSILkR	[K15](Biotin)	676.685	3	2139	1	SPSTSILkRGLKRSQ	146231944	0	0	1	0			676.685				3		0	0	1	0	0	0	56803.5	0	0	1	405; 1049; 1077; 1177; 1228; 1276; 1404; 1647; 1693; 1731; 1739; 1866; 2041; 2139; 2155; 2196; 2305; 2337	39	18	405; 1049; 1077; 1177; 1276; 1404; 1731; 1739; 2041; 2155; 2337	27	11
Rif1	51869	146231944	NP_780447.4	telomere-associated protein RIF1 [Mus musculus]	188	[K].SKINKCVDSSFVSLPVPESNLR.[T]	SKINKCVDSSFVSLPVPESNLR	[K](Biotin)			X	2
Rif1	51869	146231944	NP_780447.4	telomere-associated protein RIF1 [Mus musculus]	188	[R].EVTNSKSDSENLANAGKK.[S]	EVTNSkSDSENLANAGKK	[K6](Biotin)	706.677	3	1276	2	KREVTNSkSDSENLA	146231944	1	1	1	1	706.677	706.676	706.675	706.674	3	3	3	3	1	1	1	1	271618	200632	727597	468222	2	2	405; 1049; 1077; 1177; 1228; 1276; 1404; 1647; 1693; 1731; 1739; 1866; 2041; 2139; 2155; 2196; 2305; 2337	39	18	405; 1049; 1077; 1177; 1276; 1404; 1731; 1739; 2041; 2155; 2337	27	11
Rif1	51869	146231944	NP_780447.4	telomere-associated protein RIF1 [Mus musculus]	188	[R].SPKVFNVK.[K]	SPkVFNVK	[K3](Biotin)	572.813	2	2305	1	TLPIRSPkVFNVKKA	146231944	0	0	0	1				572.813				2	0	0	0	1	0	0	0	428624	0	1	405; 1049; 1077; 1177; 1228; 1276; 1404; 1647; 1693; 1731; 1739; 1866; 2041; 2139; 2155; 2196; 2305; 2337	39	18	405; 1049; 1077; 1177; 1276; 1404; 1731; 1739; 2041; 2155; 2337	27	11
Rif1	51869	146231944	NP_780447.4	telomere-associated protein RIF1 [Mus musculus]	188	[R].GSASPGLSPLTPGHKGASPYGSPR.[G]	GSASPGLSPLTPGHkGASPYGSPR	[K15](Biotin)	835.419	3	405	1	SPLTPGHkGASPYGS	146231944	1	1	1	1	835.419	835.418	835.418	835.418	3	3	3	3	1	1	1	1	639934	405927	1.30548e+06	841539	2	2	405; 1049; 1077; 1177; 1228; 1276; 1404; 1647; 1693; 1731; 1739; 1866; 2041; 2139; 2155; 2196; 2305; 2337	39	18	405; 1049; 1077; 1177; 1276; 1404; 1731; 1739; 2041; 2155; 2337	27	11
Rif1	51869	146231944	NP_780447.4	telomere-associated protein RIF1 [Mus musculus]	188	[R].VSDSSLSPEKFTQVECQHKR.[S]	VSDSSLSPEkFTQVECQHKR	[K10](Biotin)	647.812	4	1693	2	DSSLSPEkFTQVECQ	146231944	0	0	1	0			647.812				4		0	0	1	0	0	0	392366	0	0	1	405; 1049; 1077; 1177; 1228; 1276; 1404; 1647; 1693; 1731; 1739; 1866; 2041; 2139; 2155; 2196; 2305; 2337	39	18	405; 1049; 1077; 1177; 1276; 1404; 1731; 1739; 2041; 2155; 2337	27	11
Rif1	51869	146231944	NP_780447.4	telomere-associated protein RIF1 [Mus musculus]	188	[R].KEVLISSK.[I]	kEVLISSK	[K1](Biotin)	565.319	2	1177	1	ITGFDARkEVLISSK	146231944	1	1	1	1	565.319	565.318	565.318	565.318	2	2	2	2	1	1	1	1	5.60016e+06	2623179	8932536	6475780	2	2	405; 1049; 1077; 1177; 1228; 1276; 1404; 1647; 1693; 1731; 1739; 1866; 2041; 2139; 2155; 2196; 2305; 2337	39	18	405; 1049; 1077; 1177; 1276; 1404; 1731; 1739; 2041; 2155; 2337	27	11
Rif1	51869	146231944	NP_780447.4	telomere-associated protein RIF1 [Mus musculus]	188	[R].TEQIVNEDSQAAALAPNPKTLR.[R]	TEQIVNEDSQAAALAPNPkTLR	[K19](Biotin)	864.777	3	1404	1	AALAPNPkTLRRSSR	146231944	1	1	1	1	864.776	864.776	864.777	864.776	3	3	3	3	1	1	1	1	217897	258689	567478	377565	2	2	405; 1049; 1077; 1177; 1228; 1276; 1404; 1647; 1693; 1731; 1739; 1866; 2041; 2139; 2155; 2196; 2305; 2337	39	18	405; 1049; 1077; 1177; 1276; 1404; 1731; 1739; 2041; 2155; 2337	27	11
Rif1	51869	146231944	NP_780447.4	telomere-associated protein RIF1 [Mus musculus]	188	[R].TEQIVNEDSQAAALAPNPKTLRR.[S]	TEQIVNEDSQAAALAPNPkTLRR	[K19](Biotin)	916.81	3	1404	2	AALAPNPkTLRRSSR	146231944	1	1	1	1	916.81	916.808	916.809	916.808	3	3	3	3	1	1	1	1	766867	499586	1.36831e+06	1.0421e+06	2	2	405; 1049; 1077; 1177; 1228; 1276; 1404; 1647; 1693; 1731; 1739; 1866; 2041; 2139; 2155; 2196; 2305; 2337	39	18	405; 1049; 1077; 1177; 1276; 1404; 1731; 1739; 2041; 2155; 2337	27	11
Rif1	51869	146231944	NP_780447.4	telomere-associated protein RIF1 [Mus musculus]	188	[K].LKLESSSPKIK.[S]	LKLESSSPKIK	[K](Biotin)			X	2
Rif1	51869	146231944	NP_780447.4	telomere-associated protein RIF1 [Mus musculus]	188	[R].SQEDEISPVNKIR.[R]	SQEDEISPVNkIR	[K11](Biotin)	580.958	3	2155	1	DEISPVNkIRRVSFA	146231944	1	1	1	1	580.958	580.958	580.958	580.958	3	3	3	3	2	2	2	2	1.36332e+06	942922	2.42042e+06	1.60602e+06	4	4	405; 1049; 1077; 1177; 1228; 1276; 1404; 1647; 1693; 1731; 1739; 1866; 2041; 2139; 2155; 2196; 2305; 2337	39	18	405; 1049; 1077; 1177; 1276; 1404; 1731; 1739; 2041; 2155; 2337	27	11
Rif1	51869	146231944	NP_780447.4	telomere-associated protein RIF1 [Mus musculus]	188	[R].TVNCKTETSIELNKLDEAK.[L]	TVNCkTETSIELNKLDEAK	[K5](Biotin)	807.067	3	2041	2	GERTVNCkTETSIEL	146231944	1	1	1	1	807.067	807.067	807.067	807.067	3	3	3	3	1	1	1	1	1577369	1239327	2.37142e+06	2.17843e+06	2	2	405; 1049; 1077; 1177; 1228; 1276; 1404; 1647; 1693; 1731; 1739; 1866; 2041; 2139; 2155; 2196; 2305; 2337	39	18	405; 1049; 1077; 1177; 1276; 1404; 1731; 1739; 2041; 2155; 2337	27	11
Rif1	51869	146231944	NP_780447.4	telomere-associated protein RIF1 [Mus musculus]	188	[K].LLEEEKSTDFVFIPPEGK.[E]	LLEEEkSTDFVFIPPEGK	[K6](Biotin)	768.723	3	1049	1	GKLLEEEkSTDFVFI	146231944	1	1	1	1	768.723	768.722	768.721	768.722	3	3	3	3	1	1	1	2	648162	438682	766188	1.09001e+06	2	3	405; 1049; 1077; 1177; 1228; 1276; 1404; 1647; 1693; 1731; 1739; 1866; 2041; 2139; 2155; 2196; 2305; 2337	39	18	405; 1049; 1077; 1177; 1276; 1404; 1731; 1739; 2041; 2155; 2337	27	11
Rif1	51869	146231944	NP_780447.4	telomere-associated protein RIF1 [Mus musculus]	188	[R].SQEDEISPVNKIRR.[V]	SQEDEISPVNkIRR	[K11](Biotin)	632.992	3	2155	2	DEISPVNkIRRVSFA	146231944	0	0	1	1			632.991	632.992			3	3	0	0	1	1	0	0	855731	635084	0	2	405; 1049; 1077; 1177; 1228; 1276; 1404; 1647; 1693; 1731; 1739; 1866; 2041; 2139; 2155; 2196; 2305; 2337	39	18	405; 1049; 1077; 1177; 1276; 1404; 1731; 1739; 2041; 2155; 2337	27	11
Rif1	51869	146231944	NP_780447.4	telomere-associated protein RIF1 [Mus musculus]	188	[K].SFIGLKNTESYAIK.[S]	SFIGLkNTESYAIK	[K6](Biotin)	898.967	3	1731	1	EKSFIGLkNTESYAI	146231944	1	1	1	1	599.648	599.647	898.967	599.646	3	3	2	3	1	1	2	1	173236	206545	725079	235629	2	3	405; 1049; 1077; 1177; 1228; 1276; 1404; 1647; 1693; 1731; 1739; 1866; 2041; 2139; 2155; 2196; 2305; 2337	39	18	405; 1049; 1077; 1177; 1276; 1404; 1731; 1739; 2041; 2155; 2337	27	11
Rif1	51869	146231944	NP_780447.4	telomere-associated protein RIF1 [Mus musculus]	188	[K].EVLKTKR.[C]	EVLkTKR	[K4](Biotin)	367.215	3	1077	2	EHQKEVLkTKRCDIP	146231944	1	1	1	1	367.214	367.215	367.215	367.214	3	3	3	3	1	1	1	1	1.12344e+06	776547	1504917	1.22401e+06	2	2	405; 1049; 1077; 1177; 1228; 1276; 1404; 1647; 1693; 1731; 1739; 1866; 2041; 2139; 2155; 2196; 2305; 2337	39	18	405; 1049; 1077; 1177; 1276; 1404; 1731; 1739; 2041; 2155; 2337	27	11
Rif1	51869	146231944	NP_780447.4	telomere-associated protein RIF1 [Mus musculus]	188	[K].NTESYAIKSVEKK.[K]	NTESYAIkSVEKK	[K8](Biotin)	574.963	3	1739	2	NTESYAIkSVEKKKT	146231944	1	0	1	0	574.962		574.963		3		3		1	0	1	0	246071	0	316743	0	1	1	405; 1049; 1077; 1177; 1228; 1276; 1404; 1647; 1693; 1731; 1739; 1866; 2041; 2139; 2155; 2196; 2305; 2337	39	18	405; 1049; 1077; 1177; 1276; 1404; 1731; 1739; 2041; 2155; 2337	27	11
Rif1	51869	146231944	NP_780447.4	telomere-associated protein RIF1 [Mus musculus]	188	[K].INKCVDSSFVSLPVPESNLR.[T]	INkCVDSSFVSLPVPESNLR	[K3](Biotin)	829.751	3	1647	1	EEKSKINkCVDSSFV	146231944	0	0	1	1			829.751	829.751			3	3	0	0	1	1	0	0	83198.3	65538	0	2	405; 1049; 1077; 1177; 1228; 1276; 1404; 1647; 1693; 1731; 1739; 1866; 2041; 2139; 2155; 2196; 2305; 2337	39	18	405; 1049; 1077; 1177; 1276; 1404; 1731; 1739; 2041; 2155; 2337	27	11
Rif1	51869	146231944	NP_780447.4	telomere-associated protein RIF1 [Mus musculus]	188	[K].SGKLLEEEKSTDFVFIPPEGK.[E]	SGKLLEEEkSTDFVFIPPEGK	[K9](Biotin)	859.439	3	1049	2	GKLLEEEkSTDFVFI	146231944	1	1	1	0	859.438	859.439	859.439		3	3	3		1	1	1	0	413038	244640	439156	0	2	1	405; 1049; 1077; 1177; 1228; 1276; 1404; 1647; 1693; 1731; 1739; 1866; 2041; 2139; 2155; 2196; 2305; 2337	39	18	405; 1049; 1077; 1177; 1276; 1404; 1731; 1739; 2041; 2155; 2337	27	11
Rif1	51869	146231944	NP_780447.4	telomere-associated protein RIF1 [Mus musculus]	188	[K].QLSENGELDISDVGKACK.[V]	QLSENGELDISDVGkACK	[K15](Biotin)	730.346	3	1866	1	LDISDVGkACKVIAG	146231944	0	0	1	1			730.346	730.346			3	3	0	0	1	1	0	0	120566	226827	0	2	405; 1049; 1077; 1177; 1228; 1276; 1404; 1647; 1693; 1731; 1739; 1866; 2041; 2139; 2155; 2196; 2305; 2337	39	18	405; 1049; 1077; 1177; 1276; 1404; 1731; 1739; 2041; 2155; 2337	27	11
Rif1	51869	146231944	NP_780447.4	telomere-associated protein RIF1 [Mus musculus]	188	[K].SVKTSPTSHSK.[H]	SVkTSPTSHSK	[K3](Biotin)	462.234	3	2196	1	SPIIKSVkTSPTSHS	146231944	0	0	0	1				462.234				3	0	0	0	1	0	0	0	151445	0	1	405; 1049; 1077; 1177; 1228; 1276; 1404; 1647; 1693; 1731; 1739; 1866; 2041; 2139; 2155; 2196; 2305; 2337	39	18	405; 1049; 1077; 1177; 1276; 1404; 1731; 1739; 2041; 2155; 2337	27	11
Rif1	51869	146231944	NP_780447.4	telomere-associated protein RIF1 [Mus musculus]	188	[R].GLEEIPIFDISEKAVNGVESR.[T]	GLEEIPIFDISEkAVNGVESR	[K13](Biotin)	843.433	3	2337	1	PIFDISEkAVNGVES	146231944	1	1	1	1	843.427	843.433	843.428	843.43	3	3	3	3	1	1	1	1	54317.4	42796.1	12678.3	170516	2	2	405; 1049; 1077; 1177; 1228; 1276; 1404; 1647; 1693; 1731; 1739; 1866; 2041; 2139; 2155; 2196; 2305; 2337	39	18	405; 1049; 1077; 1177; 1276; 1404; 1731; 1739; 2041; 2155; 2337	27	11
Ddx39	68278	568957494	XP_006531395.1	ATP-dependent RNA helicase DDX39A isoform X1 [Mus musculus]	27	[K].DVKGSYVSIHSSGFR.[D]	DVkGSYVSIHSSGFR	[K3](Biotin)	622.304	3	35	1	APPKKDVkGSYVSIH	568957494	1	0	0	0	622.304				3				1	0	0	0	227452	0	0	0	1	0				35	1	1
Hist2h2bb	319189	68226433	NP_783597.2	histone H2B type 2-B [Mus musculus]	20	[K].AVTKVQK.[K]	AVTkVQK	[K4](Biotin)	500.288	2	21	1	GSKKAVTkVQKKDGK	68226433	1	1	1	1	500.286	500.288	500.287	500.286	2	2	2	2	1	1	1	1	6.30255e+06	3.67336e+06	10801760	6148698	2	2	21; 86; 109; 117	7	4	21; 47; 86; 109; 117	11	5
Hist2h2bb	319189	68226433	NP_783597.2	histone H2B type 2-B [Mus musculus]	20	[R].LLLPGELAKHAVSEGTK.[A]	LLLPGELAkHAVSEGTK	[K9](Biotin)	663.699	3	109	1	LLPGELAkHAVSEGT	68226433	1	1	1	1	663.698	663.699	663.699	663.699	3	3	3	3	1	1	1	1	737650	969819	1.00021e+06	996168	2	2	21; 86; 109; 117	7	4	21; 47; 86; 109; 117	11	5
Hist2h2bb	319189	68226433	NP_783597.2	histone H2B type 2-B [Mus musculus]	20	[K].HAVSEGTKAVTK.[Y]	HAVSEGTkAVTK	[K8](Biotin)	727.377	3	117	1	HAVSEGTkAVTKYTS	68226433	1	1	1	1	485.254	727.377	485.254	485.254	3	2	3	3	2	2	1	1	1.18871e+06	742999	941783	749563	4	2	21; 86; 109; 117	7	4	21; 47; 86; 109; 117	11	5
Hist2h2bb	319189	68226433	NP_783597.2	histone H2B type 2-B [Mus musculus]	20	[R].LAHYNKR.[S]	LAHYNkR	[K6](Biotin)	564.292	3	86	1	SRLAHYNkRSTITSR	68226433	1	1	0	1	564.292	376.531		376.531	2	3		3	1	1	0	1	148905	1.0241e+06	0	937236	2	1	21; 86; 109; 117	7	4	21; 47; 86; 109; 117	11	5
Hist2h2bb	319189	68226433	NP_783597.2	histone H2B type 2-B [Mus musculus]	20	[K].AVTKYTSSK.[-I]	AVTKYTSSK	[K](Biotin)			X	1
Hist2h2bb	319189	68226433	NP_783597.2	histone H2B type 2-B [Mus musculus]	20	[K].VLKQVHPDTGISSK.[A]	VLkQVHPDTGISSK	[K3](Biotin)	578.979	3	47	1	VYVYKVLkQVHPDTG	68226433	0	1	0	0		578.979				3			0	1	0	0	0	526147	0	0	1	0	21; 86; 109; 117	7	4	21; 47; 86; 109; 117	11	5
Hist2h2bb	319189	68226433	NP_783597.2	histone H2B type 2-B [Mus musculus]	20	[K].AVTKVQKK.[D]	AVTKVQKK	[K](Biotin)			X	2
Tpr	108989	270309140	NP_598541.3	nucleoprotein TPR [Mus musculus]	176	[R].KGAILSEEELAAMSPTAAAVAK.[I]	kGAILSEEELAAMSPTAAAVAK	[K1](Biotin)	795.413	3	440	1	LLSATKRkGAILSEE	270309140	1	0	1	0	795.413		795.41		3		3		1	0	1	0	57498.5	0	88025.6	0	1	1	440; 464; 1633	12	3	440; 464	9	2
Tpr	108989	270309140	NP_598541.3	nucleoprotein TPR [Mus musculus]	176	[K].IVKPGMK.[L]	IVkPGMK	[K3](Biotin)	507.778	2	464	0	AAVAKIVkPGMKLTE	270309140	1	1	1	1	499.78	507.777	507.777	507.778	2	2	2	2	2	2	2	3	4.24408e+07	2.70005e+07	39159872	3.58085e+07	4	5	440; 464; 1633	12	3	440; 464	9	2
Tpr	108989	270309140	NP_598541.3	nucleoprotein TPR [Mus musculus]	176	[K].IVKPGMK.[L]	IVkPGMK	[K3](Biotin)	507.778	2	464	0	AAVAKIVkPGMKLTE	270309140	1	1	1	1	499.78	507.777	507.777	507.778	2	2	2	2	2	2	2	3	4.24408e+07	2.70005e+07	39159872	3.58085e+07	4	5	440; 464; 1633	12	3	440; 464	9	2
Tpr	108989	270309140	NP_598541.3	nucleoprotein TPR [Mus musculus]	176	[K].SKITHLSGVKDQLTK.[E]	SkITHLSGVKDQLTK	[K2](Biotin)	627.682	3	1633	2	TLALAKSkITHLSGV	270309140	0	0	0	1				627.682				3	0	0	0	1	0	0	0	129783	0	1	440; 464; 1633	12	3	440; 464	9	2
Ahctf1	226747	568910764	XP_006496863.1	protein ELYS isoform X1 [Mus musculus]	128	[K].LVSPLASPVDEIKTGKPR.[K]	LVSPLASPVDEIkTGKPR	[K13](Biotin)	711.73	3	2280	1	ASPVDEIkTGKPRKT	568910764	0	0	1	0			711.73				3		0	0	1	0	0	0	154495	0	0	1	1041; 1328; 1337; 1352; 1542; 1554; 1560; 1721; 1750; 1771; 2078; 2085; 2220; 2255; 2267; 2280; 2307	30	17	1328; 1337; 1560; 1721; 1750; 1771; 2078; 2267	12	8
Ahctf1	226747	568910764	XP_006496863.1	protein ELYS isoform X1 [Mus musculus]	128	[R].SLGQKLTLNLKEDEIEAHVPK.[E]	SLGQkLTLNLKEDEIEAHVPK	[K5](Biotin)	647.85	4	1554	2	SERSLGQkLTLNLKE	568910764	0	0	0	1				647.85				4	0	0	0	1	0	0	0	110932	0	1	1041; 1328; 1337; 1352; 1542; 1554; 1560; 1721; 1750; 1771; 2078; 2085; 2220; 2255; 2267; 2280; 2307	30	17	1328; 1337; 1560; 1721; 1750; 1771; 2078; 2267	12	8
Ahctf1	226747	568910764	XP_006496863.1	protein ELYS isoform X1 [Mus musculus]	128	[R].TSILTADHKESVANTVADVESSGSTSSKCPVTSER.[S]	TSILTADHKESVANTVADVESSGSTSSkCPVTSER	[K28](Biotin)	969.961	4	1542	2	SSGSTSSkCPVTSER	568910764	0	0	1	0			969.961				4		0	0	1	0	0	0	251022	0	0	1	1041; 1328; 1337; 1352; 1542; 1554; 1560; 1721; 1750; 1771; 2078; 2085; 2220; 2255; 2267; 2280; 2307	30	17	1328; 1337; 1560; 1721; 1750; 1771; 2078; 2267	12	8
Ahctf1	226747	568910764	XP_006496863.1	protein ELYS isoform X1 [Mus musculus]	128	[K].TSDKNTYFPLDVPAK.[G]	TSDkNTYFPLDVPAK	[K4](Biotin)	641.317	3	1352	1	EWMKTSDkNTYFPLD	568910764	0	0	1	0			641.317				3		0	0	1	0	0	0	39775.5	0	0	1	1041; 1328; 1337; 1352; 1542; 1554; 1560; 1721; 1750; 1771; 2078; 2085; 2220; 2255; 2267; 2280; 2307	30	17	1328; 1337; 1560; 1721; 1750; 1771; 2078; 2267	12	8
Ahctf1	226747	568910764	XP_006496863.1	protein ELYS isoform X1 [Mus musculus]	128	[K].EATPVAAGEAGDEDGAVIVSKAAHSSR.[L]	EATPVAAGEAGDEDGAVIVSkAAHSSR	[K21](Biotin)	941.12	3	1771	1	DGAVIVSkAAHSSRL	568910764	0	0	1	0			941.12				3		0	0	1	0	0	0	584548	0	0	1	1041; 1328; 1337; 1352; 1542; 1554; 1560; 1721; 1750; 1771; 2078; 2085; 2220; 2255; 2267; 2280; 2307	30	17	1328; 1337; 1560; 1721; 1750; 1771; 2078; 2267	12	8
Ahctf1	226747	568910764	XP_006496863.1	protein ELYS isoform X1 [Mus musculus]	128	[K].SVLVPNKEAALVVTSK.[R]	SVLVPNkEAALVVTSK	[K7](Biotin)	627.69	3	2085	1	KSVLVPNkEAALVVT	568910764	0	0	1	1			627.69	627.69			3	3	0	0	1	1	0	0	271119	153730	0	2	1041; 1328; 1337; 1352; 1542; 1554; 1560; 1721; 1750; 1771; 2078; 2085; 2220; 2255; 2267; 2280; 2307	30	17	1328; 1337; 1560; 1721; 1750; 1771; 2078; 2267	12	8
Ahctf1	226747	568910764	XP_006496863.1	protein ELYS isoform X1 [Mus musculus]	128	[R].KKPSSFPKQILR.[R]	KKPSSFPkQILR	[K8](Biotin)	552.32	3	2307	2	KKPSSFPkQILRRKM	568910764	0	0	1	1			552.32	552.32			3	3	0	0	1	1	0	0	744762	541682	0	2	1041; 1328; 1337; 1352; 1542; 1554; 1560; 1721; 1750; 1771; 2078; 2085; 2220; 2255; 2267; 2280; 2307	30	17	1328; 1337; 1560; 1721; 1750; 1771; 2078; 2267	12	8
Ahctf1	226747	568910764	XP_006496863.1	protein ELYS isoform X1 [Mus musculus]	128	[R].NTGKGSSWSPPPVEIK.[L]	NTGkGSSWSPPPVEIK	[K4](Biotin)	637.321	3	2255	1	RASRNTGkGSSWSPP	568910764	0	0	1	1			637.32	637.321			3	3	0	0	1	1	0	0	186531	200699	0	2	1041; 1328; 1337; 1352; 1542; 1554; 1560; 1721; 1750; 1771; 2078; 2085; 2220; 2255; 2267; 2280; 2307	30	17	1328; 1337; 1560; 1721; 1750; 1771; 2078; 2267	12	8
Ahctf1	226747	568910764	XP_006496863.1	protein ELYS isoform X1 [Mus musculus]	128	[R].VTDLPSAVTADQESHKVETLPYVPEPVK.[V]	VTDLPSAVTADQESHkVETLPYVPEPVK	[K16](Biotin)	1092.56	3	1721	1	TADQESHkVETLPYV	568910764	1	0	1	1	1092.56		1092.56	1092.55	3		3	3	1	0	2	1	165529	0	1054500	384153	1	3	1041; 1328; 1337; 1352; 1542; 1554; 1560; 1721; 1750; 1771; 2078; 2085; 2220; 2255; 2267; 2280; 2307	30	17	1328; 1337; 1560; 1721; 1750; 1771; 2078; 2267	12	8
Ahctf1	226747	568910764	XP_006496863.1	protein ELYS isoform X1 [Mus musculus]	128	[K].TSDKNTYFPLDVPAKGPQK.[V]	TSDKNTYFPLDVPAKGPQK	[K](Biotin)			X	2
Ahctf1	226747	568910764	XP_006496863.1	protein ELYS isoform X1 [Mus musculus]	128	[R].SKEATPVAAGEAGDEDGAVIVSKAAHSSR.[L]	SKEATPVAAGEAGDEDGAVIVSkAAHSSR	[K23](Biotin)	1012.83	4	1771	2	DGAVIVSkAAHSSRL	568910764	1	1	1	1	759.875	759.874	1012.83	759.876	4	4	3	4	1	1	2	1	1.63751e+06	1.07238e+06	3.84677e+06	3111461	2	3	1041; 1328; 1337; 1352; 1542; 1554; 1560; 1721; 1750; 1771; 2078; 2085; 2220; 2255; 2267; 2280; 2307	30	17	1328; 1337; 1560; 1721; 1750; 1771; 2078; 2267	12	8
Ahctf1	226747	568910764	XP_006496863.1	protein ELYS isoform X1 [Mus musculus]	128	[R].SKEATPVAAGEAGDEDGAVIVSK.[A]	SkEATPVAAGEAGDEDGAVIVSK	[K2](Biotin)	809.729	3	1750	1	VIKDTRSkEATPVAA	568910764	0	1	1	1		809.729	809.729	809.729		3	3	3	0	1	1	1	0	240218	826818	555436	1	2	1041; 1328; 1337; 1352; 1542; 1554; 1560; 1721; 1750; 1771; 2078; 2085; 2220; 2255; 2267; 2280; 2307	30	17	1328; 1337; 1560; 1721; 1750; 1771; 2078; 2267	12	8
Ahctf1	226747	568910764	XP_006496863.1	protein ELYS isoform X1 [Mus musculus]	128	[R].ATDDRNTKAFVSTSFHK.[C]	ATDDRNTkAFVSTSFHK	[K8](Biotin)	717.683	4	1328	2	ATDDRNTkAFVSTSF	568910764	1	0	1	1	538.513		538.513	717.683	4		4	3	1	0	1	2	413064	0	731235	737398	1	3	1041; 1328; 1337; 1352; 1542; 1554; 1560; 1721; 1750; 1771; 2078; 2085; 2220; 2255; 2267; 2280; 2307	30	17	1328; 1337; 1560; 1721; 1750; 1771; 2078; 2267	12	8
Ahctf1	226747	568910764	XP_006496863.1	protein ELYS isoform X1 [Mus musculus]	128	[R].NVSTLEKSVLVPNKEAALVVTSK.[R]	NVSTLEkSVLVPNKEAALVVTSK	[K7](Biotin)	884.829	3	2078	2	RNVSTLEkSVLVPNK	568910764	1	1	1	1	884.828	884.827	884.827	884.829	3	3	3	3	1	1	1	1	331544	244918	630501	581101	2	2	1041; 1328; 1337; 1352; 1542; 1554; 1560; 1721; 1750; 1771; 2078; 2085; 2220; 2255; 2267; 2280; 2307	30	17	1328; 1337; 1560; 1721; 1750; 1771; 2078; 2267	12	8
Ahctf1	226747	568910764	XP_006496863.1	protein ELYS isoform X1 [Mus musculus]	128	[K].AFVSTSFHKCGLPAETEWMK.[T]	AFVSTSFHkCGLPAETEWMK	[K9](Biotin)	851.398	3	1337	1	FVSTSFHkCGLPAET	568910764	1	0	0	1	851.398			851.397	3			3	1	0	0	1	181731	0	0	300467	1	1	1041; 1328; 1337; 1352; 1542; 1554; 1560; 1721; 1750; 1771; 2078; 2085; 2220; 2255; 2267; 2280; 2307	30	17	1328; 1337; 1560; 1721; 1750; 1771; 2078; 2267	12	8
Ahctf1	226747	568910764	XP_006496863.1	protein ELYS isoform X1 [Mus musculus]	128	[K].SISNTSKLLGELESDPKPLEIIEQKPK.[R]	SISNTSkLLGELESDPKPLEIIEQKPK	[K7](Biotin)	805.686	4	2220	1	KSISNTSkLLGELES	568910764	0	0	0	1				805.686				4	0	0	0	1	0	0	0	281637	0	1	1041; 1328; 1337; 1352; 1542; 1554; 1560; 1721; 1750; 1771; 2078; 2085; 2220; 2255; 2267; 2280; 2307	30	17	1328; 1337; 1560; 1721; 1750; 1771; 2078; 2267	12	8
Ahctf1	226747	568910764	XP_006496863.1	protein ELYS isoform X1 [Mus musculus]	128	[R].ANYISALKLNQILK.[N]	ANYISALkLNQILK	[K8](Biotin)	605.677	3	1041	1	ANYISALkLNQILKN	568910764	0	0	0	1				605.677				3	0	0	0	1	0	0	0	64163.3	0	1	1041; 1328; 1337; 1352; 1542; 1554; 1560; 1721; 1750; 1771; 2078; 2085; 2220; 2255; 2267; 2280; 2307	30	17	1328; 1337; 1560; 1721; 1750; 1771; 2078; 2267	12	8
Ahctf1	226747	568910764	XP_006496863.1	protein ELYS isoform X1 [Mus musculus]	128	[K].LTLNLKEDEIEAHVPKENVGLPEESPR.[I]	LTLNLkEDEIEAHVPKENVGLPEESPR	[K6](Biotin)	821.425	4	1560	2	QKLTLNLkEDEIEAH	568910764	1	1	0	1	821.425	821.423		821.423	4	4		4	1	1	0	1	291197	368450	0	495105	2	1	1041; 1328; 1337; 1352; 1542; 1554; 1560; 1721; 1750; 1771; 2078; 2085; 2220; 2255; 2267; 2280; 2307	30	17	1328; 1337; 1560; 1721; 1750; 1771; 2078; 2267	12	8
Ahctf1	226747	568910764	XP_006496863.1	protein ELYS isoform X1 [Mus musculus]	128	[K].GSSWSPPPVEIKLVSPLASPVDEIK.[T]	GSSWSPPPVEIkLVSPLASPVDEIK	[K12](Biotin)	953.506	3	2267	1	SPPPVEIkLVSPLAS	568910764	1	1	0	1	953.505	953.505		953.506	3	3		3	1	1	0	1	64242.3	110169	0	483334	2	1	1041; 1328; 1337; 1352; 1542; 1554; 1560; 1721; 1750; 1771; 2078; 2085; 2220; 2255; 2267; 2280; 2307	30	17	1328; 1337; 1560; 1721; 1750; 1771; 2078; 2267	12	8
Ahctf1	226747	568910764	XP_006496863.1	protein ELYS isoform X1 [Mus musculus]	128	[R].SLGQKLTLNLKEDEIEAHVPKENVGLPEESPR.[I]	SLGQKLTLNLKEDEIEAHVPKENVGLPEESPR	[K](Biotin)			X	3
Ahctf1	226747	568910764	XP_006496863.1	protein ELYS isoform X1 [Mus musculus]	128	[R].NVSTLEKSVLVPNK.[E]	NVSTLEkSVLVPNK	[K7](Biotin)	585.323	3	2078	1	RNVSTLEkSVLVPNK	568910764	0	0	0	1				585.323				3	0	0	0	1	0	0	0	0	0	1	1041; 1328; 1337; 1352; 1542; 1554; 1560; 1721; 1750; 1771; 2078; 2085; 2220; 2255; 2267; 2280; 2307	30	17	1328; 1337; 1560; 1721; 1750; 1771; 2078; 2267	12	8
Nup98	269966	568950761	XP_006507958.1	nuclear pore complex protein Nup98-Nup96 isoform X1 [Mus musculus]	83	[R].SIVGGLLQSKFASGTFLSPSASVQECR.[T]	SIVGGLLQSkFASGTFLSPSASVQECR	[K10](Biotin)	1018.18	3	1051	1	VGGLLQSkFASGTFL	568950761	0	1	0	1		1018.18		1018.18		3		3	0	1	0	1	0	32424.8	0	146931	1	1	1051	1	1	551; 639; 1051	4	3
Nup98	269966	568950761	XP_006507958.1	nuclear pore complex protein Nup98-Nup96 isoform X1 [Mus musculus]	83	[K].ALTTPTHYKLTPRPATR.[V]	ALTTPTHYkLTPRPATR	[K9](Biotin)	538.294	4	551	1	LTTPTHYkLTPRPAT	568950761	1	1	0	0	538.294	538.293			4	4			1	1	0	0	406060	281365	0	0	2	0	1051	1	1	551; 639; 1051	4	3
Nup98	269966	568950761	XP_006507958.1	nuclear pore complex protein Nup98-Nup96 isoform X1 [Mus musculus]	83	[R].FSFLSKPVDENNQQDGEDDSLVSR.[F]	FSFLSkPVDENNQQDGEDDSLVSR	[K6](Biotin)	984.782	3	639	0	ERFSFLSkPVDENNQ	568950761	1	0	0	0	984.782				3				1	0	0	0	30091.6	0	0	0	1	0	1051	1	1	551; 639; 1051	4	3
LOC105243690	105243690	755490560	XP_011236511.1	nucleophosmin-like [Mus musculus]	26	[K].VKLDEDDEDDDEDDEDDDDDDFDEEETEEKVPVK.[K]	VKLDEDDEDDDEDDEDDDDDDFDEEETEEkVPVk	[K30; K34](Biotin)	1125.19	4	62; 66	2	DEEETEEkVPVKKSV; TEEKVPVkKSVRDTP	755490560	0	0	0	2				1125.19				4	0	0	0	1	0	0	0	284979	0	1	62; 66; 75; 85; 95; 135; 145	11	7	75; 85; 95; 135; 139; 145	14	6
LOC105243690	105243690	755490560	XP_011236511.1	nucleophosmin-like [Mus musculus]	26	[K].GGSLPKVEAK.[F]	GGSLPkVEAK	[K6](Biotin)	606.327	2	135	1	EKGGSLPkVEAKFIN	755490560	1	1	1	1	606.326	606.327	606.327	606.327	2	2	2	2	1	1	1	1	1.95059e+06	1.05968e+06	2.52209e+06	1.6755e+06	2	2	62; 66; 75; 85; 95; 135; 145	11	7	75; 85; 95; 135; 139; 145	14	6
LOC105243690	105243690	755490560	XP_011236511.1	nucleophosmin-like [Mus musculus]	26	[K].GPSSVEDIKAK.[M]	GPSSVEDIKAK	[K](Biotin)			X	1
LOC105243690	105243690	755490560	XP_011236511.1	nucleophosmin-like [Mus musculus]	26	[K].FINYVKNCFR.[M]	FINYVkNCFR	[K6](Biotin)	793.885	2	145	1	AKFINYVkNCFRMTD	755490560	1	1	1	1	793.885	793.884	793.885	793.884	2	2	2	2	1	1	1	1	344125	258420	482443	267291	2	2	62; 66; 75; 85; 95; 135; 145	11	7	75; 85; 95; 135; 139; 145	14	6
LOC105243690	105243690	755490560	XP_011236511.1	nucleophosmin-like [Mus musculus]	26	[R].SKGQESFK.[K]	SkGQESFK	[K2](Biotin)	568.774	2	95	1	KPSTPRSkGQESFKK	755490560	1	1	1	1	568.774	568.774	568.774	568.774	2	2	2	2	1	1	1	1	693351	579505	747807	541128	2	2	62; 66; 75; 85; 95; 135; 145	11	7	75; 85; 95; 135; 139; 145	14	6
LOC105243690	105243690	755490560	XP_011236511.1	nucleophosmin-like [Mus musculus]	26	[K].TPKGPSSVEDIKAK.[M]	TPKGPSSVEDIKAK	[K](Biotin)			X	2
LOC105243690	105243690	755490560	XP_011236511.1	nucleophosmin-like [Mus musculus]	26	[R].DTPAKNAQK.[S]	DTPAkNAQK	[K5](Biotin)	599.798	2	75	1	SVRDTPAkNAQKSNQ	755490560	1	1	0	1	599.796	599.798		599.798	2	2		2	1	1	0	1	512288	326750	0	314553	2	1	62; 66; 75; 85; 95; 135; 145	11	7	75; 85; 95; 135; 139; 145	14	6
LOC105243690	105243690	755490560	XP_011236511.1	nucleophosmin-like [Mus musculus]	26	[K].SNQNGKDLKPSTPR.[S]	SNQNGkDLKPSTPR	[K6](Biotin)	589.966	3	85	1	QKSNQNGkDLKPSTP	755490560	1	1	1	1	589.965	589.965	589.966	589.965	3	3	3	3	1	1	1	1	1.46332e+06	806834	1.16644e+06	780875	2	2	62; 66; 75; 85; 95; 135; 145	11	7	75; 85; 95; 135; 139; 145	14	6
LOC105243690	105243690	755490560	XP_011236511.1	nucleophosmin-like [Mus musculus]	26	[K].MQASIEKGGSLPKVEAK.[F]	MQASIEKGGSLPkVEAK	[K13](Biotin)	667.017	3	135	2	EKGGSLPkVEAKFIN	755490560	1	0	0	0	667.017				3				1	0	0	0	659888	0	0	0	1	0	62; 66; 75; 85; 95; 135; 145	11	7	75; 85; 95; 135; 139; 145	14	6
LOC105243690	105243690	755490560	XP_011236511.1	nucleophosmin-like [Mus musculus]	26	[R].SKGQESFKK.[Q]	SKGQESFKK	[K](Biotin)			X	2
LOC105243690	105243690	755490560	XP_011236511.1	nucleophosmin-like [Mus musculus]	26	[R].SKGQESFKKQEK.[T]	SkGQESFKKQEK	[K2](Biotin)	413.213	4	95	3	KPSTPRSkGQESFKK	755490560	0	1	0	1		413.213		413.213		4		4	0	1	0	1	0	241685	0	174466	1	1	62; 66; 75; 85; 95; 135; 145	11	7	75; 85; 95; 135; 139; 145	14	6
LOC105243690	105243690	755490560	XP_011236511.1	nucleophosmin-like [Mus musculus]	26	[K].GGSLPKVEAKFINYVK.[N]	GGSLPKVEAkFINYVK	[K10](Biotin)	659.361	3	139	2	SLPKVEAkFINYVKN	755490560	1	0	0	0	659.361				3				1	0	0	0	210367	0	0	0	1	0	62; 66; 75; 85; 95; 135; 145	11	7	75; 85; 95; 135; 139; 145	14	6
LOC105243690	105243690	755490560	XP_011236511.1	nucleophosmin-like [Mus musculus]	26	[K].SVRDTPAKNAQK.[S]	SVRDTPAkNAQK	[K8](Biotin)	514.268	3	75	2	SVRDTPAkNAQKSNQ	755490560	0	1	0	0		514.268				3			0	1	0	0	0	0	0	0	1	0	62; 66; 75; 85; 95; 135; 145	11	7	75; 85; 95; 135; 139; 145	14	6
Hist1h2bb	319178	28316760	NP_783595.1	histone H2B type 1-B [Mus musculus]	20	[R].LLLPGELAKHAVSEGTK.[A]	LLLPGELAkHAVSEGTK	[K9](Biotin)	663.699	3	109	1	LLPGELAkHAVSEGT	28316760	1	1	1	1	663.698	663.699	663.699	663.699	3	3	3	3	1	1	1	1	737650	969819	1.00021e+06	996168	2	2	21; 86; 109; 117	7	4	21; 47; 86; 109; 117	11	5
Hist1h2bb	319178	28316760	NP_783595.1	histone H2B type 1-B [Mus musculus]	20	[K].AISKAQKK.[D]	AISkAQKK	[K4](Biotin)	367.214	3	21	2	GSKKAISkAQKKDGK	28316760	1	0	1	0	367.214		367.214		3		3		2	0	1	0	1.63032e+06	0	2.62205e+06	0	2	1	21; 86; 109; 117	7	4	21; 47; 86; 109; 117	11	5
Hist1h2bb	319178	28316760	NP_783595.1	histone H2B type 1-B [Mus musculus]	20	[K].HAVSEGTKAVTK.[Y]	HAVSEGTkAVTK	[K8](Biotin)	727.377	3	117	1	HAVSEGTkAVTKYTS	28316760	1	1	1	1	485.254	727.377	485.254	485.254	3	2	3	3	2	2	1	1	1.18871e+06	742999	941783	749563	4	2	21; 86; 109; 117	7	4	21; 47; 86; 109; 117	11	5
Hist1h2bb	319178	28316760	NP_783595.1	histone H2B type 1-B [Mus musculus]	20	[R].LAHYNKR.[S]	LAHYNkR	[K6](Biotin)	564.292	3	86	1	SRLAHYNkRSTITSR	28316760	1	1	0	1	564.292	376.531		376.531	2	3		3	1	1	0	1	148905	1.0241e+06	0	937236	2	1	21; 86; 109; 117	7	4	21; 47; 86; 109; 117	11	5
Hist1h2bb	319178	28316760	NP_783595.1	histone H2B type 1-B [Mus musculus]	20	[K].AVTKYTSSK.[-I]	AVTKYTSSK	[K](Biotin)			X	1
Hist1h2bb	319178	28316760	NP_783595.1	histone H2B type 1-B [Mus musculus]	20	[K].VLKQVHPDTGISSK.[A]	VLkQVHPDTGISSK	[K3](Biotin)	578.979	3	47	1	VYVYKVLkQVHPDTG	28316760	0	1	0	0		578.979				3			0	1	0	0	0	526147	0	0	1	0	21; 86; 109; 117	7	4	21; 47; 86; 109; 117	11	5
Hist1h2bb	319178	28316760	NP_783595.1	histone H2B type 1-B [Mus musculus]	20	[K].KAISKAQK.[K]	KAISkAQK	[K5](Biotin)	550.318	2	21	2	GSKKAISkAQKKDGK	28316760	0	0	1	0			550.318				2		0	0	1	0	0	0	470928	0	0	1	21; 86; 109; 117	7	4	21; 47; 86; 109; 117	11	5
Smchd1	74355	148839318	NP_083163.3	structural maintenance of chromosomes flexible hinge domain-containing protein 1 [Mus musculus]	162	[R].CNESLCHSPKIEVTECPIPTKR.[M]	CNESLCHSPkIEVTECPIPTKR	[K10](Biotin)	961.119	4	1977	2	ESLCHSPkIEVTECP	148839318	1	1	1	1	721.093	961.119	721.093	721.093	4	3	4	4	2	2	2	2	8649257	5.558e+06	2.43809e+07	1.69906e+07	4	4	1636; 1977	9	2	1977	8	1
Smchd1	74355	148839318	NP_083163.3	structural maintenance of chromosomes flexible hinge domain-containing protein 1 [Mus musculus]	162	[R].RCNESLCHSPKIEVTECPIPTKR.[M]	RCNESLCHSPkIEVTECPIPTKR	[K11](Biotin)	760.119	5	1977	3	ESLCHSPkIEVTECP	148839318	1	1	1	1	760.119	608.295	608.295	608.296	4	5	5	5	2	2	2	2	962184	664951	2.67503e+06	1.97794e+06	4	4	1636; 1977	9	2	1977	8	1
Smchd1	74355	148839318	NP_083163.3	structural maintenance of chromosomes flexible hinge domain-containing protein 1 [Mus musculus]	162	[K].EKDELSKSITMYR.[S]	EKDELSkSITMYR	[K7](Biotin)	609.298	3	1636	2	KEKDELSkSITMYRS	148839318	0	0	1	0			609.298				3		0	0	1	0	0	0	235730	0	0	1	1636; 1977	9	2	1977	8	1
Hnrnpr	74326	568931988	XP_006539284.1	heterogeneous nuclear ribonucleoprotein R isoform X1 [Mus musculus]	44	[K].VKVLFVR.[N]	VkVLFVR	[K2](Biotin)	543.828	2	344	1	PEVMAKVkVLFVRNL	568931988	0	0	1	0			543.828				2		0	0	1	0	0	0	81924.7	0	0	1	344	1	1
Bclaf1	72567	70906447	NP_001020563.1	bcl-2-associated transcription factor 1 isoform 1 [Mus musculus]	92	[K].TGKFLK.[R]	TGkFLK	[K3](Biotin)	460.257	2	333	1	QETAKTGkFLKRFTD	70906447	1	0	0	0	460.257				2				1	0	0	0	199384	0	0	0	1	0	333; 419; 439; 460; 548; 830	9	6	302; 333; 419; 439; 460; 534; 548; 830	14	8
Bclaf1	72567	70906447	NP_001020563.1	bcl-2-associated transcription factor 1 isoform 1 [Mus musculus]	92	[K].LKMAPVPLDDSNRPASLTK.[D]	LkMAPVPLDDSNRPASLTK	[K2](Biotin)	760.404	3	548	1	HRPEVKLkMAPVPLD	70906447	1	1	1	1	760.404	760.402	760.401	760.4	3	3	3	3	1	1	1	1	798935	835260	677655	651803	2	2	333; 419; 439; 460; 548; 830	9	6	302; 333; 419; 439; 460; 534; 548; 830	14	8
Bclaf1	72567	70906447	NP_001020563.1	bcl-2-associated transcription factor 1 isoform 1 [Mus musculus]	92	[K].SKVSLKGNR.[E]	SkVSLKGNR	[K2](Biotin)	405.561	3	439	2	EGPKYKSkVSLKGNR	70906447	1	0	0	1	405.56			405.561	3			3	1	0	0	1	297206	0	0	172473	1	1	333; 419; 439; 460; 548; 830	9	6	302; 333; 419; 439; 460; 534; 548; 830	14	8
Bclaf1	72567	70906447	NP_001020563.1	bcl-2-associated transcription factor 1 isoform 1 [Mus musculus]	92	[K].TGKFLKR.[F]	TGkFLKR	[K3](Biotin)	359.207	3	333	2	QETAKTGkFLKRFTD	70906447	0	1	0	1		359.207		359.207		3		3	0	1	0	1	0	439753	0	328630	1	1	333; 419; 439; 460; 548; 830	9	6	302; 333; 419; 439; 460; 534; 548; 830	14	8
Bclaf1	72567	70906447	NP_001020563.1	bcl-2-associated transcription factor 1 isoform 1 [Mus musculus]	92	[R].IKMIASDSHRPEVK.[L]	IkMIASDSHRPEVK	[K2](Biotin)	459.992	4	534	1	EESPLRIkMIASDSH	70906447	1	0	0	0	459.992				4				1	0	0	0	992000	0	0	0	1	0	333; 419; 439; 460; 548; 830	9	6	302; 333; 419; 439; 460; 534; 548; 830	14	8
Bclaf1	72567	70906447	NP_001020563.1	bcl-2-associated transcription factor 1 isoform 1 [Mus musculus]	92	[K].LKETAYIVERPSTAK.[D]	LkETAYIVERPSTAK	[K2](Biotin)	644.683	3	460	1	EEKNYKLkETAYIVE	70906447	1	1	1	1	644.682	644.683	644.682	644.681	3	3	3	3	1	1	1	1	601545	463263	346250	369243	2	2	333; 419; 439; 460; 548; 830	9	6	302; 333; 419; 439; 460; 534; 548; 830	14	8
Bclaf1	72567	70906447	NP_001020563.1	bcl-2-associated transcription factor 1 isoform 1 [Mus musculus]	92	[K].RPKEEEWDPEYTPK.[S]	RPkEEEWDPEYTPK	[K3](Biotin)	677.318	3	830	1	TTFQKRPkEEEWDPE	70906447	1	1	1	0	677.316	677.318	677.315		3	3	3		1	1	1	0	281683	218035	181648	0	2	1	333; 419; 439; 460; 548; 830	9	6	302; 333; 419; 439; 460; 534; 548; 830	14	8
Bclaf1	72567	70906447	NP_001020563.1	bcl-2-associated transcription factor 1 isoform 1 [Mus musculus]	92	[K].SVLADQGKSFATSSHR.[N]	SVLADQGkSFATSSHR	[K8](Biotin)	639.649	3	419	1	SVLADQGkSFATSSH	70906447	1	1	1	1	639.648	639.649	639.648	639.648	3	3	3	3	1	1	1	1	478911	259895	0	284563	2	2	333; 419; 439; 460; 548; 830	9	6	302; 333; 419; 439; 460; 534; 548; 830	14	8
Bclaf1	72567	70906447	NP_001020563.1	bcl-2-associated transcription factor 1 isoform 1 [Mus musculus]	92	[K].RPKEEEWDPEYTPKSK.[K]	RPKEEEWDPEYTPKSK	[K](Biotin)			X	2
Bclaf1	72567	70906447	NP_001020563.1	bcl-2-associated transcription factor 1 isoform 1 [Mus musculus]	92	[R].SPAKTITPQNAPREESR.[G]	SPAkTITPQNAPREESR	[K4](Biotin)	703.357	3	302	2	PSRRSPAkTITPQNA	70906447	1	1	0	0	703.357	703.357			3	3			1	1	0	0	88844.1	0	0	0	2	0	333; 419; 439; 460; 548; 830	9	6	302; 333; 419; 439; 460; 534; 548; 830	14	8
Numa1	101706	568949271	XP_006507236.1	nuclear mitotic apparatus protein 1 isoform X2 [Mus musculus]	149	[R].DLGKFQVATDALKSR.[E]	DLGKFQVATDALkSR	[K13](Biotin)	625.665	3	1704	2	QVATDALkSREPQVK	568949271	0	0	1	0			625.665				3		0	0	1	0	0	0	133842	0	0	1	926; 1078; 1438; 1512; 1695; 1704; 1762; 1931	32	8	1078; 1512; 1695; 1762; 1931	25	5
Numa1	101706	568949271	XP_006507236.1	nuclear mitotic apparatus protein 1 isoform X2 [Mus musculus]	149	[R].NRVCPPHLKTCYPLESRPTLSLATITDEEMK.[T]	NRVCPPHLkTCYPLESRPTLSLATITDEEMK	[K9](Biotin)	780.587	5	1931	2	RVCPPHLkTCYPLES	568949271	1	1	1	1	777.387	777.388	780.587	777.385	5	5	5	5	1	1	1	1	889346	1157104	561635	2.01861e+06	2	2	926; 1078; 1438; 1512; 1695; 1704; 1762; 1931	32	8	1078; 1512; 1695; 1762; 1931	25	5
Numa1	101706	568949271	XP_006507236.1	nuclear mitotic apparatus protein 1 isoform X2 [Mus musculus]	149	[R].VCPPHLKTCYPLESRPTLSLATITDEEMK.[T]	VCPPHLkTCYPLESRPTLSLATITDEEMK	[K7](Biotin)	903.947	4	1931	1	RVCPPHLkTCYPLES	568949271	1	1	1	1	903.947	903.944	903.944	903.945	4	4	4	4	1	1	2	1	519213	566893	521825	1.35977e+06	2	3	926; 1078; 1438; 1512; 1695; 1704; 1762; 1931	32	8	1078; 1512; 1695; 1762; 1931	25	5
Numa1	101706	568949271	XP_006507236.1	nuclear mitotic apparatus protein 1 isoform X2 [Mus musculus]	149	[K].KAHGLLAEENR.[G]	kAHGLLAEENR	[K1](Biotin)	488.586	3	1438	1	EQLSMLKkAHGLLAE	568949271	0	0	0	1				488.586				3	0	0	0	1	0	0	0	263685	0	1	926; 1078; 1438; 1512; 1695; 1704; 1762; 1931	32	8	1078; 1512; 1695; 1762; 1931	25	5
Numa1	101706	568949271	XP_006507236.1	nuclear mitotic apparatus protein 1 isoform X2 [Mus musculus]	149	[R].LPPKVESLESLYFTPTPAR.[G]	LPPkVESLESLYFTPTPAR	[K4](Biotin)	1186.13	3	1762	1	ISQRLPPkVESLESL	568949271	1	1	1	1	1186.13	791.085	791.083	791.084	2	3	3	3	7	4	6	7	21450516	1.16101e+07	2.1078e+07	4.10141e+07	11	13	926; 1078; 1438; 1512; 1695; 1704; 1762; 1931	32	8	1078; 1512; 1695; 1762; 1931	25	5
Numa1	101706	568949271	XP_006507236.1	nuclear mitotic apparatus protein 1 isoform X2 [Mus musculus]	149	[R].DLGKFQVATDALK.[S]	DLGkFQVATDALK	[K4](Biotin)	816.428	2	1695	1	QQLRDLGkFQVATDA	568949271	1	1	1	0	816.428	816.428	816.426		2	2	2		1	1	1	0	2.08094e+06	1041703	3.62743e+06	0	2	1	926; 1078; 1438; 1512; 1695; 1704; 1762; 1931	32	8	1078; 1512; 1695; 1762; 1931	25	5
Numa1	101706	568949271	XP_006507236.1	nuclear mitotic apparatus protein 1 isoform X2 [Mus musculus]	149	[K].YEGAKVK.[V]	YEGAkVK	[K5](Biotin)	510.762	2	1512	1	TAKYEGAkVKVLEER	568949271	0	1	1	1		510.762	510.761	510.762		2	2	2	0	1	1	1	0	578431	1.17479e+06	1.2442e+06	1	2	926; 1078; 1438; 1512; 1695; 1704; 1762; 1931	32	8	1078; 1512; 1695; 1762; 1931	25	5
Numa1	101706	568949271	XP_006507236.1	nuclear mitotic apparatus protein 1 isoform X2 [Mus musculus]	149	[K].AGEQQETASLELLKEPPR.[A]	AGEQQETASLELLkEPPR	[K14](Biotin)	741.372	3	926	1	TASLELLkEPPRAAN	568949271	0	0	1	0			741.372				3		0	0	1	0	0	0	117365	0	0	1	926; 1078; 1438; 1512; 1695; 1704; 1762; 1931	32	8	1078; 1512; 1695; 1762; 1931	25	5
Numa1	101706	568949271	XP_006507236.1	nuclear mitotic apparatus protein 1 isoform X2 [Mus musculus]	149	[R].VCPPHLKTCYPLESRPTLSLATITDEEMK.[T]	VCPPHLkTCYPLESRPTLSLATITDEEMK	[K7](Biotin)	903.947	4	1931	1	RVCPPHLkTCYPLES	568949271	1	1	1	1	903.947	903.944	903.944	903.945	4	4	4	4	1	1	2	1	519213	566893	521825	1.35977e+06	2	3	926; 1078; 1438; 1512; 1695; 1704; 1762; 1931	32	8	1078; 1512; 1695; 1762; 1931	25	5
Numa1	101706	568949271	XP_006507236.1	nuclear mitotic apparatus protein 1 isoform X2 [Mus musculus]	149	[R].NRVCPPHLKTCYPLESRPTLSLATITDEEMK.[T]	NRVCPPHLkTCYPLESRPTLSLATITDEEMK	[K9](Biotin)	780.587	5	1931	2	RVCPPHLkTCYPLES	568949271	1	1	1	1	777.387	777.388	780.587	777.385	5	5	5	5	1	1	1	1	889346	1157104	561635	2.01861e+06	2	2	926; 1078; 1438; 1512; 1695; 1704; 1762; 1931	32	8	1078; 1512; 1695; 1762; 1931	25	5
Numa1	101706	568949271	XP_006507236.1	nuclear mitotic apparatus protein 1 isoform X2 [Mus musculus]	149	[K].ELQQTLEQLKIQLVKK.[E]	ELQQTLEQLkIQLVKK	[K10](Biotin)	722.418	3	1078	2	QQTLEQLkIQLVKKE	568949271	1	1	1	1	722.418	722.418	722.417	722.416	3	3	3	3	1	1	1	1	234793	186381	24169.6	312341	2	2	926; 1078; 1438; 1512; 1695; 1704; 1762; 1931	32	8	1078; 1512; 1695; 1762; 1931	25	5
Numa1	101706	568949271	XP_006507236.1	nuclear mitotic apparatus protein 1 isoform X2 [Mus musculus]	149	[K].ELQQTLEQLKIQLVK.[K]	ELQQTLEQLkIQLVK	[K10](Biotin)	679.72	3	1078	1	QQTLEQLkIQLVKKE	568949271	0	1	0	1		679.72		679.719		3		3	0	1	0	1	0	34694.8	0	241694	1	1	926; 1078; 1438; 1512; 1695; 1704; 1762; 1931	32	8	1078; 1512; 1695; 1762; 1931	25	5
Mdn1	100019	568925788	XP_006537539.1	midasin isoform X1 [Mus musculus]	306	[K].NEKSSGELNR.[F]	NEkSSGELNR	[K3](Biotin)	680.32	2	22	1	LIAAKNEkSSGELNR	568925788	0	1	1	1		680.32	680.319	680.32		2	2	2	0	1	1	1	0	244888	353100	232718	1	2	22	4	1	22	3	1
Mdn1	100019	568925788	XP_006537539.1	midasin isoform X1 [Mus musculus]	306	[R].LIAAKNEKSSGELNR.[F]	LIAAKNEkSSGELNR	[K8](Biotin)	619.329	3	22	2	LIAAKNEkSSGELNR	568925788	1	1	1	1	619.328	619.329	619.329	619.327	3	3	3	3	1	1	1	1	616703	343841	261449	214704	2	2	22	4	1	22	3	1
Tpm2	22004	482677666	NP_001264805.1	tropomyosin beta chain isoform Tpm2.1sm/cy [Mus musculus]	34	[R].KLVILEGELERSEER.[A]	kLVILEGELERSEER	[K1](Biotin)	676.028	3	168	2	KYEEVARkLVILEGE	482677666	1	0	0	0	676.028				3				1	0	0	0	67377.8	0	0	0	1	0				168	1	1
Tmpo	21917	121949769	NP_001073601.1	lamina-associated polypeptide 2 isoform beta [Mus musculus]	31	[R].TEHNQVGEKTEER.[R]	TEHNQVGEkTEER	[K9](Biotin)	594.941	3	224	1	EHNQVGEkTEERRVD	121949769	0	0	0	1				594.941				3	0	0	0	1	0	0	0	93932.3	0	1	202; 206; 212; 224; 236; 258; 279; 283	26	8	206; 212; 224; 236; 258; 279; 283	18	7
Tmpo	21917	121949769	NP_001073601.1	lamina-associated polypeptide 2 isoform beta [Mus musculus]	31	[K].LEKREPLKGR.[A]	LEKREPLkGR	[K8](Biotin)	484.61	3	202	3	LEKREPLkGRAKTPV	121949769	0	0	0	1				484.61				3	0	0	0	1	0	0	0	202221	0	1	202; 206; 212; 224; 236; 258; 279; 283	26	8	206; 212; 224; 236; 258; 279; 283	18	7
Tmpo	21917	121949769	NP_001073601.1	lamina-associated polypeptide 2 isoform beta [Mus musculus]	31	[R].MEESFSSKYVPK.[Y]	MEESFSSkYVPK	[K8](Biotin)	837.382	3	279	1	MEESFSSkYVPKYAP	121949769	1	1	1	1	558.59	553.259	837.382	829.386	3	3	2	2	2	1	3	2	809296	929167	6.69091e+06	7.54551e+06	3	5	202; 206; 212; 224; 236; 258; 279; 283	26	8	206; 212; 224; 236; 258; 279; 283	18	7
Tmpo	21917	121949769	NP_001073601.1	lamina-associated polypeptide 2 isoform beta [Mus musculus]	31	[K].TPVTLKQR.[R]	TPVTLkQR	[K6](Biotin)	584.829	2	212	1	AKTPVTLkQRRTEHN	121949769	0	0	1	0			584.829				2		0	0	1	0	0	0	621249	0	0	1	202; 206; 212; 224; 236; 258; 279; 283	26	8	206; 212; 224; 236; 258; 279; 283	18	7
Tmpo	21917	121949769	NP_001073601.1	lamina-associated polypeptide 2 isoform beta [Mus musculus]	31	[R].AKTPVTLK.[Q]	AkTPVTLK	[K2](Biotin)	542.315	2	206	1	EPLKGRAkTPVTLKQ	121949769	1	0	1	1	542.315		542.315	542.315	2		2	2	1	0	1	1	1265839	0	2.76293e+06	2.57918e+06	1	2	202; 206; 212; 224; 236; 258; 279; 283	26	8	206; 212; 224; 236; 258; 279; 283	18	7
Tmpo	21917	121949769	NP_001073601.1	lamina-associated polypeptide 2 isoform beta [Mus musculus]	31	[R].AKTPVTLKQR.[R]	AKTPVTLkQR	[K8](Biotin)	456.603	3	212	2	AKTPVTLkQRRTEHN	121949769	1	1	1	1	456.603	456.602	456.599	456.602	3	3	3	3	1	1	1	1	2.95729e+06	1.69866e+06	6298085	5105902	2	2	202; 206; 212; 224; 236; 258; 279; 283	26	8	206; 212; 224; 236; 258; 279; 283	18	7
Tmpo	21917	121949769	NP_001073601.1	lamina-associated polypeptide 2 isoform beta [Mus musculus]	31	[R].MEESFSSKYVPK.[Y]	MEESFSSkYVPK	[K8](Biotin)	837.382	3	279	1	MEESFSSkYVPKYAP	121949769	1	1	1	1	558.59	553.259	837.382	829.386	3	3	2	2	2	1	3	2	809296	929167	6.69091e+06	7.54551e+06	3	5	202; 206; 212; 224; 236; 258; 279; 283	26	8	206; 212; 224; 236; 258; 279; 283	18	7
Tmpo	21917	121949769	NP_001073601.1	lamina-associated polypeptide 2 isoform beta [Mus musculus]	31	[R].RPIKGAAGRPLELSDFR.[M]	RPIkGAAGRPLELSDFR	[K4](Biotin)	528.041	4	258	1	ASCRRPIkGAAGRPL	121949769	1	1	1	1	528.04	528.04	528.04	528.041	4	4	4	4	1	1	1	1	158972	129839	341235	330887	2	2	202; 206; 212; 224; 236; 258; 279; 283	26	8	206; 212; 224; 236; 258; 279; 283	18	7
Tmpo	21917	121949769	NP_001073601.1	lamina-associated polypeptide 2 isoform beta [Mus musculus]	31	[R].RTEHNQVGEKTEER.[R]	RTEHNQVGEkTEER	[K10](Biotin)	646.974	4	224	2	EHNQVGEkTEERRVD	121949769	1	1	0	1	485.482	485.482		646.974	4	4		3	1	1	0	2	108587	56964.6	0	201285	2	2	202; 206; 212; 224; 236; 258; 279; 283	26	8	206; 212; 224; 236; 258; 279; 283	18	7
Tmpo	21917	121949769	NP_001073601.1	lamina-associated polypeptide 2 isoform beta [Mus musculus]	31	[K].YVPKYAPLADVK.[S]	YVPkYAPLADVK	[K4](Biotin)	795.425	2	283	1	FSSKYVPkYAPLADV	121949769	1	1	1	0	795.425	795.424	795.425		2	2	2		1	1	1	0	565637	430403	1.11088e+06	0	2	1	202; 206; 212; 224; 236; 258; 279; 283	26	8	206; 212; 224; 236; 258; 279; 283	18	7
Tmpo	21917	121949769	NP_001073601.1	lamina-associated polypeptide 2 isoform beta [Mus musculus]	31	[R].DILKEMFPYEASTPTGISASCR.[R]	DILkEMFPYEASTPTGISASCR	[K4](Biotin)	900.423	3	236	1	RVDRDILkEMFPYEA	121949769	1	0	1	0	900.423		900.421		3		3		1	0	1	0	43988.7	0	57246.1	0	1	1	202; 206; 212; 224; 236; 258; 279; 283	26	8	206; 212; 224; 236; 258; 279; 283	18	7
Tmpo	21917	121949769	NP_001073601.1	lamina-associated polypeptide 2 isoform beta [Mus musculus]	31	[R].RVDRDILKEMFPYEASTPTGISASCR.[R]	RVDRDILkEMFPYEASTPTGISASCR	[K8](Biotin)	807.144	4	236	3	RVDRDILkEMFPYEA	121949769	1	1	1	1	807.143	807.142	807.144	807.144	4	4	4	4	1	1	1	1	185185	98751.2	135975	280964	2	2	202; 206; 212; 224; 236; 258; 279; 283	26	8	206; 212; 224; 236; 258; 279; 283	18	7
Tmpo	21917	121949769	NP_001073601.1	lamina-associated polypeptide 2 isoform beta [Mus musculus]	31	[K].YVPKYAPLADVKSEK.[T]	YVPkYAPLADVKSEK	[K4](Biotin)	645.342	3	283	2	FSSKYVPkYAPLADV	121949769	0	0	1	0			645.342				3		0	0	1	0	0	0	0	0	0	1	202; 206; 212; 224; 236; 258; 279; 283	26	8	206; 212; 224; 236; 258; 279; 283	18	7
Hnrnpc	15381	283436178	NP_001164453.1	heterogeneous nuclear ribonucleoproteins C1/C2 isoform 2 [Mus musculus]	29	[K].SGFNSKSGQR.[G]	SGFNSkSGQR	[K6](Biotin)	647.305	2	163	1	GKSGFNSkSGQRGSS	283436178	1	1	0	1	647.304	647.305		647.304	2	2		2	1	1	0	1	0	146139	0	157727	2	1	89; 163	2	2	89; 163	4	2
Hnrnpc	15381	283436178	NP_001164453.1	heterogeneous nuclear ribonucleoproteins C1/C2 isoform 2 [Mus musculus]	29	[R].MIAGQVLDINLAAEPKVNR.[G]	MIAGQVLDINLAAEPkVNR	[K16](Biotin)	760.076	3	89	1	INLAAEPkVNRGKAG	283436178	1	1	0	1	760.075	760.076		760.074	3	3		3	1	1	0	1	61644	58675.7	0	94925.6	2	1	89; 163	2	2	89; 163	4	2
Hist1h1b	56702	21426893	NP_064418.1	histone H1.5 [Mus musculus]	65	[K].AVSASKER.[G]	AVSASkER	[K6](Biotin)	537.274	2	52	1	TKAVSASkERGGVSL	21426893	1	0	0	0	537.274				2				1	0	0	0	344423	0	0	0	1	0	46; 64; 81; 85; 90	15	5	46; 52; 64; 81; 85; 90	13	6
Hist1h1b	56702	21426893	NP_064418.1	histone H1.5 [Mus musculus]	65	[R].IKLGLKSLVSK.[G]	IKLGLkSLVSK	[K6](Biotin)	471.296	3	85	2	SRIKLGLkSLVSKGT	21426893	1	0	1	0	471.295		471.296		3		3		1	0	1	0	61594.1	0	147372	0	1	1	46; 64; 81; 85; 90	15	5	46; 52; 64; 81; 85; 90	13	6
Hist1h1b	56702	21426893	NP_064418.1	histone H1.5 [Mus musculus]	65	[K].SLVSKGTLVQTK.[G]	SLVSkGTLVQTK	[K5](Biotin)	743.92	3	90	1	GLKSLVSkGTLVQTK	21426893	1	1	1	1	496.282	743.92	496.282	743.919	3	2	3	2	2	1	2	1	1.20948e+06	432153	2.04319e+06	971173	3	3	46; 64; 81; 85; 90	15	5	46; 52; 64; 81; 85; 90	13	6
Hist1h1b	56702	21426893	NP_064418.1	histone H1.5 [Mus musculus]	65	[R].KATGPPVSELITKAVSASK.[E]	KATGPPVSELITkAVSASK	[K13](Biotin)	704.06	3	46	2	PVSELITkAVSASKE	21426893	1	1	1	1	704.06	704.059	704.057	704.059	3	3	3	3	1	1	1	1	221013	169647	385083	300739	2	2	46; 64; 81; 85; 90	15	5	46; 52; 64; 81; 85; 90	13	6
Hist1h1b	56702	21426893	NP_064418.1	histone H1.5 [Mus musculus]	65	[R].IKLGLK.[S]	IkLGLK	[K2](Biotin)	449.283	2	81	1	EKNNSRIkLGLKSLV	21426893	1	0	1	0	449.283		449.283		2		2		1	0	1	0	104410	0	187375	0	1	1	46; 64; 81; 85; 90	15	5	46; 52; 64; 81; 85; 90	13	6
Hist1h1b	56702	21426893	NP_064418.1	histone H1.5 [Mus musculus]	65	[K].ATGPPVSELITKAVSASK.[E]	ATGPPVSELITkAVSASK	[K12](Biotin)	661.359	3	46	1	PVSELITkAVSASKE	21426893	1	1	1	1	661.359	661.359	661.359	661.359	3	3	3	3	2	1	3	2	160592	60973.6	368233	0	3	5	46; 64; 81; 85; 90	15	5	46; 52; 64; 81; 85; 90	13	6
Hist1h1b	56702	21426893	NP_064418.1	histone H1.5 [Mus musculus]	65	[K].KALAAGGYDVEKNNSR.[I]	kALAAGGYDVEKNNSR	[K1](Biotin)	640.32	3	64	2	VSLPALKkALAAGGY	21426893	0	1	1	1		640.318	640.318	640.32		3	3	3	0	1	1	1	0	97646	0	0	1	2	46; 64; 81; 85; 90	15	5	46; 52; 64; 81; 85; 90	13	6
Hist1h1b	56702	21426893	NP_064418.1	histone H1.5 [Mus musculus]	65	[K].GTGASGSFKLNKK.[A]	GTGASGSFKLNKK	[K](Biotin)			X	2
Hist1h1b	56702	21426893	NP_064418.1	histone H1.5 [Mus musculus]	65	[K].ATGPPVSELITKAVSASKER.[G]	ATGPPVSELITkAVSASKER	[K12](Biotin)	756.409	3	46	2	PVSELITkAVSASKE	21426893	1	0	0	0	756.409				3				1	0	0	0	0	0	0	0	1	0	46; 64; 81; 85; 90	15	5	46; 52; 64; 81; 85; 90	13	6
Hist1h1b	56702	21426893	NP_064418.1	histone H1.5 [Mus musculus]	65	[R].KATGPPVSELITKAVSASKER.[G]	KATGPPVSELITkAVSASKER	[K13](Biotin)	599.579	4	46	3	PVSELITkAVSASKE	21426893	0	0	1	0			599.579				4		0	0	1	0	0	0	32100.7	0	0	1	46; 64; 81; 85; 90	15	5	46; 52; 64; 81; 85; 90	13	6
Bclaf1	72567	70906449	NP_001020564.1	bcl-2-associated transcription factor 1 isoform 3 [Mus musculus]	87	[K].TGKFLK.[R]	TGkFLK	[K3](Biotin)	460.257	2	333	1	QETAKTGkFLKRFTD	70906449	1	0	0	0	460.257				2				1	0	0	0	199384	0	0	0	1	0	333; 419; 439; 460; 548	8	5	302; 333; 419; 439; 460; 534; 548	12	7
Bclaf1	72567	70906449	NP_001020564.1	bcl-2-associated transcription factor 1 isoform 3 [Mus musculus]	87	[K].LKMAPVPLDDSNRPASLTK.[D]	LkMAPVPLDDSNRPASLTK	[K2](Biotin)	760.404	3	548	1	HRPEVKLkMAPVPLD	70906449	1	1	1	1	760.404	760.402	760.401	760.4	3	3	3	3	1	1	1	1	798935	835260	677655	651803	2	2	333; 419; 439; 460; 548	8	5	302; 333; 419; 439; 460; 534; 548	12	7
Bclaf1	72567	70906449	NP_001020564.1	bcl-2-associated transcription factor 1 isoform 3 [Mus musculus]	87	[K].SKVSLKGNR.[E]	SkVSLKGNR	[K2](Biotin)	405.561	3	439	2	EGPKYKSkVSLKGNR	70906449	1	0	0	1	405.56			405.561	3			3	1	0	0	1	297206	0	0	172473	1	1	333; 419; 439; 460; 548	8	5	302; 333; 419; 439; 460; 534; 548	12	7
Bclaf1	72567	70906449	NP_001020564.1	bcl-2-associated transcription factor 1 isoform 3 [Mus musculus]	87	[K].TGKFLKR.[F]	TGkFLKR	[K3](Biotin)	359.207	3	333	2	QETAKTGkFLKRFTD	70906449	0	1	0	1		359.207		359.207		3		3	0	1	0	1	0	439753	0	328630	1	1	333; 419; 439; 460; 548	8	5	302; 333; 419; 439; 460; 534; 548	12	7
Bclaf1	72567	70906449	NP_001020564.1	bcl-2-associated transcription factor 1 isoform 3 [Mus musculus]	87	[R].IKMIASDSHRPEVK.[L]	IkMIASDSHRPEVK	[K2](Biotin)	459.992	4	534	1	EESPLRIkMIASDSH	70906449	1	0	0	0	459.992				4				1	0	0	0	992000	0	0	0	1	0	333; 419; 439; 460; 548	8	5	302; 333; 419; 439; 460; 534; 548	12	7
Bclaf1	72567	70906449	NP_001020564.1	bcl-2-associated transcription factor 1 isoform 3 [Mus musculus]	87	[K].LKETAYIVERPSTAK.[D]	LkETAYIVERPSTAK	[K2](Biotin)	644.683	3	460	1	EEKNYKLkETAYIVE	70906449	1	1	1	1	644.682	644.683	644.682	644.681	3	3	3	3	1	1	1	1	601545	463263	346250	369243	2	2	333; 419; 439; 460; 548	8	5	302; 333; 419; 439; 460; 534; 548	12	7
Bclaf1	72567	70906449	NP_001020564.1	bcl-2-associated transcription factor 1 isoform 3 [Mus musculus]	87	[K].SVLADQGKSFATSSHR.[N]	SVLADQGkSFATSSHR	[K8](Biotin)	639.649	3	419	1	SVLADQGkSFATSSH	70906449	1	1	1	1	639.648	639.649	639.648	639.648	3	3	3	3	1	1	1	1	478911	259895	0	284563	2	2	333; 419; 439; 460; 548	8	5	302; 333; 419; 439; 460; 534; 548	12	7
Bclaf1	72567	70906449	NP_001020564.1	bcl-2-associated transcription factor 1 isoform 3 [Mus musculus]	87	[R].SPAKTITPQNAPREESR.[G]	SPAkTITPQNAPREESR	[K4](Biotin)	703.357	3	302	2	PSRRSPAkTITPQNA	70906449	1	1	0	0	703.357	703.357			3	3			1	1	0	0	88844.1	0	0	0	2	0	333; 419; 439; 460; 548	8	5	302; 333; 419; 439; 460; 534; 548	12	7
Top2b	21974	34328148	NP_033435.2	DNA topoisomerase 2-beta [Mus musculus]	187	[K].QTDKLPSK.[T]	QTDkLPSK	[K4](Biotin)	571.797	2	1473	1	FGLKQTDkLPSKTVA	34328148	0	0	0	1				571.797				2	0	0	0	1	0	0	0	144345	0	1	1473; 1477	3	2
Top2b	21974	34328148	NP_033435.2	DNA topoisomerase 2-beta [Mus musculus]	187	[K].QTDKLPSKTVAAK.[K]	QTDKLPSkTVAAK	[K8](Biotin)	538.296	3	1477	2	QTDKLPSkTVAAKKG	34328148	0	0	1	1			538.295	538.296			3	3	0	0	1	1	0	0	372134	324158	0	2	1473; 1477	3	2
Prpf40a	56194	9055218	NP_061255.1	pre-mRNA-processing factor 40 homolog A [Mus musculus]	101	[K].SDSGKPYYYNSQTKESR.[W]	SDSGKPYYYNSQTkESR	[K14](Biotin)	746.005	3	205	1	YYYNSQTkESRWAKP	9055218	1	1	1	1	746.005	746.005	746.004	746.004	3	3	3	3	1	1	1	1	356189	241670	315664	267953	2	2	205	2	1	205	2	1
Sorbs2	234214	755525454	XP_011240504.1	sorbin and SH3 domain-containing protein 2 isoform X23 [Mus musculus]	81	[K].DWYKTMFK.[Q]	DWYkTMFK	[K4](Biotin)	672.811	2	404	1	DRPKDWYkTMFKQIH	755525454	0	0	1	0			672.811				2		0	0	1	0	0	0	20219.7	0	0	1	373; 404	4	2	373	6	1
Sorbs2	234214	755525454	XP_011240504.1	sorbin and SH3 domain-containing protein 2 isoform X23 [Mus musculus]	81	[K].RVTVIKAPHYPGIGPVDESGIPTAIR.[T]	RVTVIkAPHYPGIGPVDESGIPTAIR	[K6](Biotin)	743.159	4	373	2	EKRVTVIkAPHYPGI	755525454	1	1	1	0	743.159	743.158	743.156		4	4	4		1	1	1	0	372093	352237	251390	0	2	1	373; 404	4	2	373	6	1
Sorbs2	234214	755525454	XP_011240504.1	sorbin and SH3 domain-containing protein 2 isoform X23 [Mus musculus]	81	[R].VTVIKAPHYPGIGPVDESGIPTAIR.[T]	VTVIkAPHYPGIGPVDESGIPTAIR	[K5](Biotin)	938.508	3	373	1	EKRVTVIkAPHYPGI	755525454	1	1	1	1	938.508	938.508	938.507	938.505	3	3	3	3	2	2	1	1	1.11515e+06	1.48098e+06	584638	807680	4	2	373; 404	4	2	373	6	1
Hist1h1c	50708	9845257	NP_056601.1	histone H1.2 [Mus musculus]	58	[R].IKLGLKSLVSK.[G]	IKLGLkSLVSK	[K6](Biotin)	471.296	3	85	2	SRIKLGLkSLVSKGI	9845257	1	0	1	0	471.295		471.296		3		3		1	0	1	0	61594.1	0	147372	0	1	1	52; 81; 85; 190	5	4	52; 81; 85; 190	6	4
Hist1h1c	50708	9845257	NP_056601.1	histone H1.2 [Mus musculus]	58	[K].AVAASKER.[S]	AVAASkER	[K6](Biotin)	529.276	2	52	1	TKAVAASkERSGVSL	9845257	1	0	0	1	529.276			529.276	2			2	1	0	0	1	356703	0	0	359914	1	1	52; 81; 85; 190	5	4	52; 81; 85; 190	6	4
Hist1h1c	50708	9845257	NP_056601.1	histone H1.2 [Mus musculus]	58	[R].IKLGLK.[S]	IkLGLK	[K2](Biotin)	449.283	2	81	1	EKNNSRIkLGLKSLV	9845257	1	0	1	0	449.283		449.283		2		2		1	0	1	0	104410	0	187375	0	1	1	52; 81; 85; 190	5	4	52; 81; 85; 190	6	4
Hist1h1c	50708	9845257	NP_056601.1	histone H1.2 [Mus musculus]	58	[K].KPAAAAVTKK.[V]	KPAAAAVTKK	[K](Biotin)			X	1
Hist1h1c	50708	9845257	NP_056601.1	histone H1.2 [Mus musculus]	58	[K].SASKAVKPK.[A]	SASkAVKPK	[K4](Biotin)	381.218	3	190	1	KKVKSASkAVKPKAA	9845257	1	1	1	1	381.218	381.218	381.218	381.218	3	3	3	3	1	2	1	1	1373963	766641	1.75172e+06	132041	3	2	52; 81; 85; 190	5	4	52; 81; 85; 190	6	4
Hist1h1c	50708	9845257	NP_056601.1	histone H1.2 [Mus musculus]	58	[K].GTGASGSFKLNKK.[A]	GTGASGSFKLNKK	[K](Biotin)			X	2
Hist1h1e	50709	13430890	NP_056602.1	histone H1.4 [Mus musculus]	61	[R].IKLGLKSLVSK.[G]	IKLGLkSLVSK	[K6](Biotin)	471.296	3	85	2	SRIKLGLkSLVSKGT	13430890	1	0	1	0	471.295		471.296		3		3		1	0	1	0	61594.1	0	147372	0	1	1	46; 52; 81; 85; 90; 192	8	6	52; 81; 85; 90; 192	7	5
[truncated: 1,033 more rows]

## Sheet: Unambiguous
Gene symbol	Gene ID	Database ID	RefSeq Accession	Protein Description	# Lysines	# Protein Groups	Annotated Sequence	Peptide Sequence	Peptide Modifications	m/z [Da]	Charge	# Protein Groups	Protein Positions	# Missed Cleavages	Peptide Window	Master Protein Accessions	m6A-tracer-BioID w/ DAM-LMNB1 Shield(-)_REP1.raw - #Biotin sites	m6A-tracer-BioID w/ DAM-LMNB1 Shield(-)_REP2.raw - #Biotin sites	m6A-tracer-BioID w/ DAM-LMNB1 Shield(+)_REP1.raw - #Biotin sites	m6A-tracer-BioID w/ DAM-LMNB1 Shield(+)_REP2.raw - #Biotin sites	m6A-tracer-BioID w/ DAM-LMNB1 Shield(-)_REP1.raw - m/z [Da]	m6A-tracer-BioID w/ DAM-LMNB1 Shield(-)_REP2.raw - m/z [Da]	m6A-tracer-BioID w/ DAM-LMNB1 Shield(+)_REP1.raw - m/z [Da]	m6A-tracer-BioID w/ DAM-LMNB1 Shield(+)_REP2.raw - m/z [Da]	m6A-tracer-BioID w/ DAM-LMNB1 Shield(-)_REP1.raw - Charge	m6A-tracer-BioID w/ DAM-LMNB1 Shield(-)_REP2.raw - Charge	m6A-tracer-BioID w/ DAM-LMNB1 Shield(+)_REP1.raw - Charge	m6A-tracer-BioID w/ DAM-LMNB1 Shield(+)_REP2.raw - Charge	m6A-tracer-BioID w/ DAM-LMNB1 Shield(-)_REP1.raw - #PSMs	m6A-tracer-BioID w/ DAM-LMNB1 Shield(-)_REP2.raw - #PSMs	m6A-tracer-BioID w/ DAM-LMNB1 Shield(+)_REP1.raw - #PSMs	m6A-tracer-BioID w/ DAM-LMNB1 Shield(+)_REP2.raw - #PSMs	m6A-tracer-BioID w/ DAM-LMNB1 Shield(-)_REP1.raw - Abundance	m6A-tracer-BioID w/ DAM-LMNB1 Shield(-)_REP2.raw - Abundance	m6A-tracer-BioID w/ DAM-LMNB1 Shield(+)_REP1.raw - Abundance	m6A-tracer-BioID w/ DAM-LMNB1 Shield(+)_REP2.raw - Abundance	m6A-tracer-BioID w/ DAM-LMNB1 Shield(-) - #PSMs	m6A-tracer-BioID w/ DAM-LMNB1 Shield(+) - #PSMs	m6A-tracer-BioID w/ DAM-LMNB1 Shield(+) - Biotin sites	m6A-tracer-BioID w/ DAM-LMNB1 Shield(+) - Total #PSMs	m6A-tracer-BioID w/ DAM-LMNB1 Shield(+) - #Biotin sites	m6A-tracer-BioID w/ DAM-LMNB1 Shield(-) - Biotin sites	m6A-tracer-BioID w/ DAM-LMNB1 Shield(-) - Total #PSMs	m6A-tracer-BioID w/ DAM-LMNB1 Shield(-) - #Biotin sites
[truncated: 1,335 more rows]

[truncated: 1 more sheets: Ambiguous]
